# Supplementary material
Source: PubMed Central journal article supplement (PMC1276015)
Supplement: plntcell_tpc.105.037242_1.pdf [file plntcell_tpc.105.037242_1.pdf]

Supplemental Table 2. Sequence alignments in maize inbreds, landraces, teosintes and *Tripsacum* at 35 genes that exhibited zero sequence diversity in maize inbreds.

>B73\_AY108876

tgctgtctgtatcgcctttatccccagctgcgatcactttaaggtaacttgattctgttaaactcttctctaggatag  
ttgtaatagcagttcccttcgagcagatattcaactagtttggtgtacttcttttctagttctagaatgcacattga  
cctcttagcatgcgacaaatgagaattaagaaaagaatccctgtctgtggttactcttgagatataatgttgattatga  
ctgtagcccatatgagcagcacacctgatagataagctggattatagtttgatggatttctggattgggtgctgcatgat  
gcctagttggtgaacgacactttattccggtaacctctaactcggtttacttttggtatatacagggattcacaaggtatt  
gcccaagaagtgggacaaaattctggcgatcttcatgatgttcttctgtgtgtatcaaagttagtagcgggtctacagcga  
tgctacaaaatattcaacaaggaaagtgtccttctaactgcctggatcggggagtcactgaaaatagatc-  
ttcgtggtggcttgtacgtta

>Oh43\_AY108876

tgctgtctgtatcgcctttatccccagctgcgatcactttaaggtaacttgattctgttaaactcttctctaggatag  
ttgtaatagcagttcccttcgagcagatattcaactagtttggtgtacttcttttctagttctagaatgcacattga  
cctcttagcatgcgacaaatgagaattaagaaaagaatccctgtctgtggttactcttgagatataatgttgattatga  
ctgtagcccatatgagcagcacacctgatagataagctggattatagtttgatggatttctggattgggtgctgcatgat  
gcctagttggtgaacgacactttattccggtaacctctaactcggtttacttttggtatatacagggattcacaaggtatt  
gcccaagaagtgggacaaaattctggcgatcttcatgatgttcttctgtgtgtatcaaagttagtagcgggtctacagcga  
tgctacaaaatattcaacaaggaaagtgtccttctaactgcctggatcggggagtcactgaaaatagatc-  
ttcgtggtggcttgtacgtta

>IL14H\_AY108876

-----tctgtatcgcctttat----

ccagctgcgatcactttaaggtaacttgattctgttaaactcttctctaggatagttgtaatagcagttcccttcgagca  
gatttattcaactagtttggtgtacttcttttctagttctagaatgcacattgacctcttagcatgcgacaaatgagaa  
ttaagaaaagaatccctgtctgtggttactcttgagatataatgttgattatgactgtagcccatatgagcagcacacctg  
atagataagctggattatagtttgatggatttctggattgggtgctgcatgatgcctagttggtgaacgacactttat  
tccggtaacctctaactcggtttacttttggtatatacagggattcacaaggtattgcccaagaagtgggacaaaattctgg  
cgatcttcatgatgttcttctgtgtgtatcaaagttagtagcgggtctacagcgcgatgcctacaaaatattcaacaaggaa  
agtgtccttctaactgcctggatcggggagtcactgaaaatagatc-ttcgtggtggcttgtacgtta

>Mo17\_AY108876

-----

cgcctttatccccagctgcgatcactttaaggtaacttgattctgttaaactcttctctaggatagttgtaatagcag  
ttcccttcgagcagatattcaactagtttggtgtacttcttttctagttctagaatgcacattgacctcttagcatg  
cgacaaatgagaattaagaaaagaatccctgtctgtggttactcttgagatataatgttgattatgactgtagcccata  
tgagcagcacacctgatagataagctggattatagtttgatggatttctggattgggtgctgcatgatgcctagttggtg  
aacgacactttattccggtaacctctaactcggtttacttttggtatatacagggattcacaaggtattgcccaagaagtgg  
gacaaaattctggcgatcttcatgatgttcttctgtgtgtatcaaagttagtagcgggtctacagcgcgatgcctacaaaat  
attcaacaaggaaagtgtccttctaactgcctggatcggggagtcactgaaaatagatc-  
ttcgtggtggcttgtacgt--

>Ky21\_AY108876

-----

tgcgatcactttaaggtaacttgattctgttaaactcttctctaggatagttgtaatagcagttcccttcgagcagat  
attcaactagtttggtgtacttcttttctagttctagaatgcacattgacctcttagcatgcgacaaatgagaattaag  
aaaagaatccctgtctgtggttactcttgagatataatgttgattatgactgtagcccatatgagcagcacacctgata  
taagctggattatagtttgatggatttctggattgggtgctgcatgatgcctagttggtgaacgacactttattccgg  
taacctctaactcggtttacttttggtatatacagggattcacaaggtattgcccaagaagtgggacaaaattctggcgatc  
tcatgatgttcttctgtgtgtatcaaagttagtagcgggtctacagcgcgatgcctacaaaatattcaacaaggaaagtgc  
tcttctaactgcctggatcggggagtcactgaaaatagatcttctggtggcttgtacgtta

>M37W\_AY108876

-----

ctgtatcgcctttatccccagctgcgatcactttaaggtaacttgattctgttaaactcttctctaggatagttgtaa  
tagcagttcccttcgagcagatattcaactagtttggtgtacttcttttctagttctagaatgcacattgacctctt  
agcatgcgacaaatgagaattaagaaaagaatccctgtctgtggttactcttgagatataatgttgattatgactgtag  
cccatatgagcagcacacctgatagataagctggattatagtttgatggatttctggattgggtgctgcatgatgcctag  
ttggtgaacgacactttattccggtaacctctaactcggtttacttttggtatatacagggattcacaaggtattgcccaag

aagtgggacaaaattctggcgatcttcatgattggttcttgctggtgtatcaaagttagtagcgggtctacagcgatgccta  
caaaatattcaacaaggaaagtgtctccttctaatagcctggatcggggagtgcaactgaaaatagatc-  
ttcgtggtggcttgtacgta  
>HP301\_AY108876

-----  
ttaaggtaacttgattctgttaaactcttctctaggatagttgtaatagcagttcccttcgagcagatttattcaactag  
ttgttgtacttcttttctagttctagaatgcacattgacctcttagcatgcgacaaaatgagaattaagaaaagaatcc  
ctgtctgtggttactcttgagatataattggtgattatgactgtagcccatatgcagcacacctgatagataagctggat  
tatagtttgtatggatttctggattgggtgctgcatgatgcctagttggtgaacgacactttattccggtaacctctaa  
tccgtttacttttggatatacagggattcacaaggtattgccaagaagtgggacaaaattctggcgatcttcatgattg  
ttcttgctggtgtatcaaagttagtagcgggtctacagcgatgcctacaaaatattcaacaaggaaagtgtctccttcta  
gcctggatcggggagtgcaactgaaaatagatc-ttcgtggtggcttgtacg---

>CML247\_AY108876  
tgctgtctgtatcgctttatctt-  
ccagctgcatcactttaaggtaacttgattctgttaaactcttctctaggatagttgtaatagcagttcccttcgagca  
gatttattcaactagtttgttgtacttcttttctagttctagaatgcacattgacctcttagcatgcgacaaaatgaga  
ttaagaaaagaatccctgtctgtggttactcttgagatataattggtgattatgactgtagcccatatgcagcacacctg  
atagataagctggattatagtttgtatggatttctggattgggtgctgcatgatgcctagttggtgaacgacactttat  
tccggtaacctctaataccgtttacttttggatatacagggattcacaaggtattgccaagaagtgggacaaaattctgg  
cgatcttcatgattggttcttgctggtgtatcaaagttagtagcgggtctacagcgatgcctacaaaatattcaacaaggaa  
agtgtccttctaatagcctggatcggggagtgcaactgaaaatagatc-ttcgtggtggcttgtacgta  
>NC350\_AY108876

-  
gctgtctgtatcgctttatcttccagctgcatcactttaaggtaacttgattctgttaaactcttctctaggatagtt  
gtaatagcagttcccttcgagcagatttattcaactagtttgttgtacttcttttctagttctagaatgcacattgac  
ctcttagcatgcgacaaaatgagaattaagaaaagaatccctgtctgtggttactcttgagatataattggtgattatgac  
tgtagcccatatgcagcacacctgatagataagctggattatagtttgtatggatttctggattgggtgctgcatgatg  
cctagttggtgaacgacactttattccggtaacctctaataccgtttacttttggatatacagggattcacaaggtattg  
ccaagaagtgggacaaaattctggcgatcttcatgattggttcttgctggtgtatcaaagttagtagcgggtctacagcgat  
gcctacaaaatattcaacaaggaaagtgtccttctaatagcctggatcggggagtgcaactgaaaatagatc-  
ttcgtggtggcttgtacgt--  
>Ki3\_AY108876

-----  
ctgtatcgctttatcttccagctgcatcactttaaggtaacttgattctgttaaactcttctctaggatagttgtaa  
tagcagttcccttcgagcagatttattcaactagtttgttgtacttcttttctagttctagaatgcacattgacctctt  
agcatgcgacaaaatgagaattaagaaaagaatccctgtctgtggttactcttgagatataattggtgattatgactgtag  
cccatatgcagcacacctgatagataagctggattatagtttgtatggatttctggattgggtgctgcatgatgcctag  
ttgttgaacgacactttattccggtaacctctaataccgtttacttttggatatacagggattcacaaggtattgccaag  
aagtgggacaaaattctggcgatcttcatgattggttcttgctggtgtatcaaagttagtagcgggtctacagcgatgccta  
caaaatattcaacaaggaaagtgtccttctaatagcctggatcggggagtgcaactgaaaatagatc-  
ttcgtggtggcttgtacgta  
>Kill\_AY108876

-----  
atcttctctaggatagttgtaatagcagttcccttcgagcagatttattcaactagtttgttgtacttcttttctagtt  
tctagaatgcacattgacctcttagcatgcgacaaaatgagaattaagaaaagaatccctgtctgtggttactcttgagat  
atatttgttattatgactgtagcccatatgcagcacacctgatagataagctggattatagtttgtatggatttctgga  
ttgggtgctgcatgatgcctagttggtgaacgacactttattccggtaacctctaataccgtttacttttggatataca  
gggattcacaaggtattgccaagaagtgggacaaaattctggcgatcttcatgattggttcttgctggtgtg-  
-----  
-----  
>CML333\_AY108876

-----  
cgctttatcttccagctgcatcactttaaggtaacttgattctgttaaactcttctctaggatagttgtaatagcag  
ttcccttcgagcagatttattcaactagtttgttgtacttcttttctagttctagaatgcacattgacctcttagcatg  
cgacaaaatgagaattaagaaaagaatccctgtctgtggttactcttgagatataattggtgattatgactgtagcccata  
tgagcacacctgatagataagctggattatagtttgtatggatttctggattgggtgctgcatgatgcctagttgttg  
aacgacactttattccggtaacctctaataccgtttacttttggatatacagggattcacaaggtattgccaagaagtgg

gacaaaattctggcgatcttcatgattggttcttgctgttgatcaaagttagtagcgggtctacagcgatgcctacaaaat  
attcaacaaggaaagtgtctccttctaatagcctggatcggggagtcaactgaaaatagatc-  
ttcgtggtggcttgtacgt--

>CML322\_AY108876

tgctgtctgtatcgcctttatccccagctgcatcactttaaggtaacttgattctgttaaactcttctctaggatag  
ttgtaatagcagttcccttcgagcagatatttcaactagtttggttgacttcttttctagttctagaatgcacattga  
cctcttagcatgagcaaaatgagaattaagaaaagaatccctgtctgtggttactcttgagatataattggtgattatga  
ctgtagcccatatgcagcacacctgatagataagctggattatagtttgatggatttctggattgggtgctgcatgat  
gcctagttggtgaacgacactttattccggtaacctctaatacggtttacttttggtatatacagggattcacaaggtatt  
gccaaagaagtgggacaaaattctggcgatcttcatgattggttcttgctgttgatcaaagttagtagcgggtctacagcga  
tgctacaaaatattcaacaaggaaagtgtctccttctaatagcctggatcggggagtcaactgaaaatagatc-  
ttcgtggtggcttgtacgtta

>CML69\_AY108876

tgctgtctgtatcgcctttatccc-

ccagctgcatcactttaaggtaacttgattctgttaaactcttctctaggatagttgtaatagcagttcccttcgagca  
gatttattcaactagtttggttgacttcttttctagttctagaatgcacattgacctcttagcatgagcaaaatgagaa  
ttaagaaaagaatccctgtctgtggttactcttgagatataattggtgattatgactgtagcccatatgcagcacacctg  
atagataagctggattatagtttgatggatttctggattgggtgctgcatgatgcctagttggtgaacgacactttat  
tccggtaacctctaatacggtttacttttggtatatacagggattcacaaggtattgccaaagaagtgggacaaaattctgg  
cgatcttcatgattggttcttgctgttgatcaaagttagtagcgggtctacagcgatgcctacaaaatattcaacaaggaa  
agtgtccttctaatagcctggatcggggagtcaactgaaaatagatc-ttcgtggtggcttgtacgtta

>Assinboine\_PI213793\_AY108876

tgctgtctgtatcgcctttatccccagctgcatcactttaaggtaacttgattctgttaaactcttctctaggatag  
ttgtaatagcagttcccttcgagcagatatttcaactagtttggttgacttcttttctagttctagaatgcacattga  
cctcttagcatgagcaaaatgagaattaagaaaagaatccctgtctgtggttactcttgagatataattggtgattatga  
ctgtagcccatatgcagcacacctgatagataagctggattatagtttgatggatttctggattgggtgctgcatgat  
gcctagttggtgaacgacactttattccggtaacctctaatacggtttacttttggtatatacagggattcacaaggtatt  
gccaaagaagtgggacaaaattctggcgatcttcatgattggttcttgctgttgatcaaagttagtagcgggtctacagcga  
tgctacaaaat-----

>Gordo\_CHH 160\_AY108876

tgctgtctgtatcgcctttatccccagctgcatcactttaaggtaacttgattctgttaaactcttctctaggatag  
ttgtaatagcagttcccttcgagcagatatttcaactagtttggttgacttcttttctagttctagaatgcacattga  
cctcttagcatgagcaaaatgagaattaagaaaagaatccctgtctgtggttactcttgagatataattggtgattatga  
ctgtagcccatatgcagcacacctgatagataagctggattatagtttgatggatttctggattgggtgctgcatgat  
gcctagttggtgaacgacactttattccggtaacctctaatacggtttacttttggtatatacagggattcacaaggtatt  
gccaaagaagtgggacaaaattctggcgatcttcatgattggttcttgctgttgatcaaagttagtagcgggtctacagcga  
tgctacaaaatattcaacaaggaaagtgtctccttctaatagcctggatcggggagtcaactgaaaatagatc-  
ttcgtggtggcttgtacgtta

>Guirua\_MAG 450\_AY108876

---

tgctgtctgtatcgcctttatccccagctgcatcactttaaggtaacttgattctgttaaactcttctctaggatagttg  
taatagcagttcccttcgagcagatatttcaactagtttggttgacttcttttctagttctagaatgcacattgacct  
cttagcatgagcaaaatgagaattaagaaaagaatccctgtctgtggttactcttgagatataattggtgattatgactg  
tagcccatatgcagcacacctgatagataagctggattatagtttgatggatttctggattgggtgctgcatgatgcc  
tagttggtgaacgacactttattccggtaacctctaatacggtttacttttggtatatacagggattcacaaggtattgcc  
aagaagtgggacaaaattctggcgatcttcatgattggttcttgctgttgatcaaagttagtagcgggtctacagcgatgc  
ctacaaaat-----

>Nal-tel\_YUC 7\_AY108876

tgctgtctgtatcgcctttatccccagctgcatcactttaaggtaacttgattctgttaaactcttctctaggatag  
ttgtaatagcagttcccttcgagcagatatttcaactagtttggttgacttcttttctagttctagaatgcacattga  
cctcttagcatgagcaaaatgagaattaagaaaagaatccctgtctgtggttactcttgagatataattggtgattatga  
ctgtagcccatatgcagcacacctgatagataagctggattatagtttgatggatttctggattgggtgctgcatgat  
gcctagttggtgaacgacactttattccggtaacctctaatacggtttacttttggtatatacagggattcacaaggtatt  
gccaaagaagtgggacaaaattctggcgatcttcatgattggttcttgctgttgatcaaagttagtagcgggtctacagcga  
tgctacaaaat-----

-----  
>Pisscotunto\_APC 13\_AY108876

tgctgtctgtatcgcctttatccccagctgcgatcactttaaggtaacttgattctgttaaactcttctctaggatag  
ttgtaatagcagttcccttcgagcagatattcaactagtttggtgtacttcttttctagttctagaatgcacattga  
cctcttagcatgcgacaaatgagaattaagaaaagaatccctgtctgtgggttactcttgagatatatttggtgattatga  
ctgtagcccatatgagcacacctgatagataagctggattatagtttgatggatttctggattgggtgctgccatgat  
gcctagttggtgaacgacactttattccggtaacctctaatacggttttacttttggtatatcagggattcacaaggtatt  
gccagaagtgggacaaaattctggcgatcttcatgattggtcttctgctgttgatcaaagttagtagcgggtctacagcga  
tgctacaaaatattcaacaaggaaagtgtccttctaatacgggtgagtcaggaggagtcactgaaaatagatc-  
ttcgtgggtggcttgtacgtta

>Sabanero\_SAN 329\_AY108876

---

tgtctgtatcgcctttatccccagctgcgatcactttaaggtaacttgattctgttaaactcttctctaggatagttg  
taatagcagttcccttcgagcagatattcaactagtttggtgtacttcttttctagttctagaatgcacattgacct  
cttagcatgcgacaaatgagaattaagaaaagaatccctgtctgtgggttactcttgagatatatttggtgattatgactg  
tagcccatatgagcacacctgatagataagctggattatagtttgatggatttctggattgggtgctgccatgatgcc  
tagttggtgaacgacactttattccggtaacctctaatacggttttacttttggtatatcagggattcacaaggtattgcc  
aagaagtgggacaaaattctggcgatcttcatgattggtcttctgctgttgatcaaagttagtagcgggtctacagcga  
ctacaaaatat-----

-----  
>Serrano\_GUA 14\_AY108876

tgctgtctgtatcgcctttatccccagctgcgatcactttaaggtaacttgattctgttaaactcttctctaggatag  
ttgtaatagcagttcccttcgagcagatattcaactagtttggtgtacttcttttctagttctagaatgcacattga  
cctcttagcatgcgacaaatgagaattaagaaaagaatccctgtctgtgggttactcttgagatatatttggtgattatga  
ctgtagcccatatgagcacacctgatagataagctggattatagtttgatggatttctggattgggtgctgccatgat  
gcctagttggtgaacgacactttattccggtaacctctaatacggttttacttttggtatatcagggattcacaaggtatt  
gccagaagtgggacaaaattctggcgatcttcatgattggtcttctgctgttgatcaaagttagtagcgggtctacagcga  
tgctacaaaatat-----

-----  
>Zapalote Chico\_OAX 70\_AY108876

---

tgtctgtatcgcctttatccccagctgcgatcactttaaggtaacttgattctgttaaactcttctctaggatagttg  
taatagcagttcccttcgagcagatattcaactagtttggtgtacttcttttctagttctagaatgcacattgacct  
cttagcatgcgacaaatgagaattaagaaaagaatccctgtctgtgggttactcttgagatatatttggtgattatgactg  
tagcccatatgagcacacctgatagataagctggattatagtttgatggatttctggattgggtgctgccatgatgcc  
tagttggtgaacgacactttattccggtaacctctaatacggttttacttttggtatatcagggattcacaaggtattgcc  
aagaagtgggacaaaattctggcgatcttcatgattggtcttctgctgttgatcaaagttagtagcgggtctacagcga  
ctacaaaatat-----

-----  
>Bolita\_OAX 68\_AY108876

tgctgtctgtatcgcctttatccccagctgcgatcactttaaggtaacttgattctgttaaactcttctctaggatag  
ttgtaatagcagttcccttcgagcagatattcaactagtttggtgtacttcttttctagttctagaatgcacattga  
cctcttagcatgcgacaaatgagaattaagaaaagaatccctgtctgtgggttactcttgagatatatttggtgattatga  
ctgtagcccatatgagcacacctgatagataagctggattatagtttgatggatttctggattgggtgctgccatgat  
gcctagttggtgaacgacactttattccggtaacctctaatacggttttacttttggtatatcagggattcacaaggtatt  
gccagaagtgggacaaaattctggcgatcttcatgattggtcttctgctgttgatcaaagttagtagcgggtctacagcga  
tgct-----

-----  
>Cateto Sulino\_URG 11\_AY108876

tgctgtctgtatcgcctttatccccagctgcgatcactttaaggtaacttgattctgttaaactcttctctaggatag  
ttgtaatagcagttcccttcgagcagatattcaactagtttggtgtacttcttttctagttctagaatgcacattga  
cctcttagcatgcgacaaatgagaattaagaaaagaatccctgtctgtgggttactcttgagatatatttggtgattatga  
ctgtagcccatatgagcacacctgatagataagctggattatagtttgatggatttctggattgggtgctgccatgat  
gcctagttggtgaacgacactttattccggtaacctctaatacggttttacttttggtatatcagggattcacaaggtatt  
gccagaagtgggacaaaattctggcgatcttcatgattggtcttctgctgttgatcaaagttagtagcgggtctacagcga  
tgctacaaaatat-----

-----

>Chapalote\_SIN 2\_AY108876

tgctgtctgtatcgccctttatccccagctgcatcactttaaggaacttgattctgttaaactcttctctaggatag  
ttgtaatagcagttcccttcgagcagatattcaactagtttggtgtacttctttctctagttctagaatgcacattga  
cctcttagcatgagcaaaatgagaattaagaaaagaatccctgtctgtgggtactcttgagatatattggtgattatga  
ctgtagcccatatgcagcacacctgatagataagctggattatagtttgatggatttctggattgggtgctgccatgat  
gcctagttggtgaaacgacactttattccggtaacctctaactcggttttacttttggtatatcagggattcacaaggtatt  
gccaaagaagtgggacaaaattctggcgatcttcatgattgttcttctgtgttgatcaaatgtagtagcggtctacagcga  
tgctacaaaatat-----

>Conico\_PUE 32\_AY108876

tgctgtctgtatcgccctttatccccagctgcatcactttaaggaacttgattctgttaaactcttctctaggatag  
ttgtaatagcagttcccttcgagcagatattcaactagtttggtgtacttctttctctagttctagaatgcacattga  
cctcttagcatgagcaaaatgagaattaagaaaagaatccctgtctgtgggtactcttgagatatattggtgattatga  
ctgtagcccatatgcagcacacctgatagataagctggattatagtttgatggatttctggattgggtgctgccatgat  
gcctagttggtgaaacgacactttattccggtaacctctaactcggttttacttttggtatatcagggattcacaaggtatt  
gccaaagaagtgggacaaaattctggcgatcttcatgattgttcttctgtgttgatcaaatgtagtagcggtctacagcga  
tgctacaaaatatcaacaaggaaagtgtctcttctaactgctggatcggggagtcactgaaaatagatc-  
ttcgtgggtggcttgtacgtta

>Costeno\_VEN 453\_AY108876

tgctgtctgtatcgccctttatccccagctgcatcactttaaggaacttgattctgttaaactcttctctaggatag  
ttgtaatagcagttcccttcgagcagatattcaactagtttggtgtacttctttctctagttctagaatgcacattga  
cctcttagcatgagcaaaatgagaattaagaaaagaatccctgtctgtgggtactcttgagatatattggtgattatga  
ctgtagcccatatgcagcacacctgatagataagctggattatagtttgatggatttctggattgggtgctgccatgat  
gcctagttggtgaaacgacactttattccggtaacctctaactcggttttacttttggtatatcagggattcacaaggtatt  
gccaaagaagtgggacaaaattctggcgatcttcatgattgttcttctgtgttgatcaaatgtagtagcggtctacagcga  
tgctacaaaatatcaacaaggaaagtgtctcttctaactgctggatcggggagtcactgaaaatagatc-  
ttcgtgggtggcttgtacgtta

>Cristalino Norteno\_CHI 349\_AY108876

tgctgtctgtatcgccctttatccccagctgcatcactttaaggaacttgattctgttaaactcttctctaggatag  
ttgtaatagcagttcccttcgagcagatattcaactagtttggtgtacttctttctctagttctagaatgcacattga  
cctcttagcatgagcaaaatgagaattaagaaaagaatccctgtctgtgggtactcttgagatatattggtgattatga  
ctgtagcccatatgcagcacacctgatagataagctggattatagtttgatggatttctggattgggtgctgccatgat  
gcctagttggtgaaacgacactttattccggtaacctctaactcggttttacttttggtatatcagggattcacaaggtatt  
gccaaagaagtgggacaaaattctggcgatcttcatgattgttcttctgtgttgatcaaatgtagtagcggtctacagcga  
tgctacaaaatatcaacaaggaaagtgtctcttctaactgctggatcggggagtcactgaaaatagatc-  
ttcgtgggtggcttgtacgtta

>Dzit Bacal\_GUA 131\_AY108876

tgctgtctgtatcgccctttatccccagctgcatcactttaaggaacttgattctgttaaactcttctctaggatag  
ttgtaatagcagttcccttcgagcagatattcaactagtttggtgtacttctttctctagttctagaatgcacattga  
cctcttagcatgagcaaaatgagaattaagaaaagaatccctgtctgtgggtactcttgagatatattggtgattatga  
ctgtagcccatatgcagcacacctgatagataagctggattatagtttgatggatttctggattgggtgctgccatgat  
gcctagttggtgaaacgacactttattccggtaacctctaactcggttttacttttggtatatcagggattcacaaggtatt  
gccaaagaagtgggacaaaattctggcgatcttcatgattgttcttctgtgttgatcaaatgtagtagcggtctacagcga  
tgct-----

>Jalisco\_Benz 967\_AY108876

-----  
tgcgatcactttaaggaacttgattctgttaaactcttctctaggatagttgtaatagcagttcccttcgagcagatatt  
attcaactagtttggtgtacttctttctctagttctagaatgcacattgacctcttagcatgagcaaaatgagaattaag  
aaaagaatccctgtctgtgggtactcttgagatatattggtgattatgactgtagcccatatgcagcacacctgataga  
taagctggattatagtttgatggatttctggattgggtgctgccatgatgcctagttggtgaaagacactttattccgg  
taacctctaactcggttttacttttggtatatcagggattcacaaggtattgccaaagaagtgggacaaaattctggcgatc  
ttcatgattgttcttctgtgttgatcaaatgtagtagcggtctacagcgaatgcctacaaaatatcaacaaggaaagtgc  
tcttctaactgctggatcggggagtcactgaaaatagatc-ttcgtgggtggcttgtacgtta

>Balsas\_Beadle & Kato Site 4\_AY108876

tgctgtctgtatcgccctttatccccagctgcatcactttaaggaacttgattctgttaaactcttctctaggatag  
ttgtaatagcagttcccttcgagcagatattcaactagtttggtgtacttctttctctagttctagaatgcacattga

cctcttagcatgcgacaaatgagaattaagaaaagaatccctgtctgtgggttactcttgagatatatttggttgattatga  
ctgtagcccatatgacgacacacctgatagataagctggattatagtttgatggatttctggattgggtgctgcatgat  
gcctagttggtgaaagacactttattccggtaacctctaataccggtttacttttggtatatcagggattcacaaggtatt  
gccaaagaagtgggacaaaattctggcgatcttcatgattggtcttctgtgtgtatcaaatgtagtagcgggtctacagcga  
tgcctacaaaatattcaacaaggaaagtgct-----  
-----

>Balsas\_Kato Site 4\_AY108876

tgctgtctgtatcgccctttatccccagctgcatcactttaaggtaacttgattctgttaaactcttctctaggatag  
ttgtaatagcagttcccttcgagcagatttattcaactagtttggtgtacttcttttctagttctagaatgcacattga  
cctcttagcatgcgacaaatgagaattaagaaaagaatccctgtctgtgggttactcttgagatatatttggttgattatga  
ctgtagcccatatgacgacacacctgatagataagctggattatagtttgatggatttctggattgggtgctgcatgat  
gcctagttggtgaaacgacactttattccggtaacctctaataccggtttacttttggtatatcagggattcacaaggtatt  
gccaaagaagtgggacaaaattctggcgatcttcatgattggtcttctgtgtgtatcaaatgtagtagcgggtctacagcga  
tgcctacaaaatattcaacaaggaaagtgctccttctaataccgctggatcggggagtcactgaaaatagatc-  
ttcgtgggtggcttgtacgtta

>Balsas\_Wilkes Site 6\_AY108876

tgctgtctgtatcgccctttatccccagctgcatcactttaaggtaacttgattctgttaaactcttctctaggatag  
ttgtaatagcagttcccttcgagcagatttattcaactagtttggtgtacttcttttctagttctagaatgcacattga  
cctcttagcatgcgacaaatgagaattaagaaaagaatccctgtctgtgggttactcttgagatatatttggttgattatga  
ctgtagcccatatgacgacacacctgatagataagctggattatagtttgatggatttctggattgggtgctgcatgat  
gcctagttggtgaaacgacactttattccggtaacctctaataccggtttacttttggtatatcagggattcacaaggtatt  
gccaaagaagtgggacaaaattctggcgatcttcatgattggtcttctgtgtgtatcaaatgtagtagcgggtctacagcga  
tgcctacaaaatattcaacaaggaaagtgctccttctaataccgctggatcggggagtcactgaaaatagatc-  
ttcgtgggtggcttgtacgtta

>Balsas\_INIFAP JSP y Lo5130\_AY108876

tgctgtctgtatcgccctttatccccagctgcatcactttaaggtaacttgattctgttaaactcttctctaggatag  
ttgtaatagcagttcccttcgagcagatttattcaactagtttggtgtacttcttttctagttctagaatgcacattga  
cctcttagcatgcgacaaatgagaattaagaaaagaatccctgtctgtgggttactcttgagatatatttggttgattatga  
ctgtagcccatatgacgacacacctgatagataagctggattatagtttgatggatttctggattgggtgctgcatgat  
gcctagttggtgaaacgacactttattccggtaacctctaataccggtttacttttggtatatcagggattcacaaggtatt  
gccaaagaagtgggacaaaattctggcgatcttcatgattggtcttctgtgtgtatcaaatgtagtagcgggtctacagcga  
tgcctacaaaatattcaacaaggaaagtgctccttctaataccgctggatcggggagtcactgaaaatagatc-  
ttcgtgggtggcttgtacgtta

>Balsas\_INIFAP JSG y LOS 119\_AY108876

tgctgtctgtatcgccctttatccccagctgcatcactttaaggtaacttgattctgttaaactcttctctaggatag  
ttgtaatagcaattcccttcgagcagatttattcaactagtttggtgtacttcttttctagttctagaatgcacattga  
cctcttagcatgcgacaaatgagaattaagaaaagaatccctgtctgtgggttactcttgagatatatttggttgattatga  
ctgtagcccatatgtagcacacacctgatagataagctggattatagtttgatggatttctggattgggtgctgcatgat  
gcctagttggtgaaacgacactttattctggtaacctctaataccggtttacttttggtatatcagggattcacaaggtatt  
gccaaagaagtgggacaaaattctggcgatcttcatgattggtcttctgtgtgtatcaaatgtagtagcgggtctacagcga  
tgcctacaaaatattcaacaaggaaagtgctccttctaataccgctggatcggggagtcactgaaaatagatc-  
ttcgtgggtggcttgtacgtta

>Jalisco\_INIFAP JSG y MAS 401\_AY108876

-----  
tcttctctaggatagttgtaatagcagttcccttcgagcagatttattcaactagtttggtgtacttcttttctagtt  
ctagaatgcacattgacctcttagcatgcgacaaatgagaattaagaaaagaatccctgtctgtgggttactcttgagata  
tatttggttgattatgactgtagcccatatgacgacacacctgatagataagctggattatagtttgatggatttctggat  
tggttgcctgcatgatgcctagttggtgaaagacactttattccggtaacctctaataccggtttacttttggtatatcag  
ggattcacaaggtattgccaaagaagtgggacaaaattctggcgatcttcatgattggtcttctgtgtgtatcaaatgtag  
tagcgggtctacagcagatgctacaaaatattcaacaaggaaagtgctccttctaataccgctggatcggggagtcactgaa  
aatagatc-ttcgtgggtggcttgtacgtta

>Balsas\_CIMMYT 8783\_AY108876

-----  
gcatcactttaaggtaacttgattctgttaaactcttctctaggatagttgtaatagcagttcccttcgagcagattta  
ttcaactagtttggtgtacttcttttctagttctagaatgcacattgacctcttagcatgcgacaaatgagaattaaga  
aagaatccctgtctgtgggttacccttgagatatatttggttgattatgactgtagcccatatgtagcacacacctgatagat  
aagctggattatagtttgatggatttctggattgggtgctgcatgatgcctagttggtgaaacgacactttattctgggt

aacctctaataccggttttacttttgggtatatcagggattcacaaggtattgccaagaagtgggacaaaattctggcgatct  
tcatgattggttcttctgctgttgatcaaagttagtagcgggtctacagcgcgatgcctacaaaatattcaacaaggaaagtgc  
ccttctaatagcctggatcggggagtcactgaaaatagatc-ttcgtgggtggcttgtacgtta

>Oaxaca\_INIFAP JSG 197\_AY108876

tgctgtctgtatcgcctttatccccagctgcatcactttaaggtaacttgattctgttaaactcttctctaggatag  
ttgtaatagcagttcccttcgagcagatatttcaactagtttggttgtacttcttttctagttctagaatgcacattga  
cctcttagcatgcgacaaaatgagaattaagaaaagaatccctgtctgtgggttactcttgagatataattggtgattatga  
ctgtagcccatatgcagcacacctgatagataagctggattatagtttgtatggatttctggattgggtgctgccatgat  
gcctagttggtgaacgcacactttattccggtaacctctaataccggttttacttttgggtatatcagggattcacaaggtatt  
gccaagaagtgggacaaaattctggcgatcttcatgattggttcttctgctgttgatcaaagttagtagcgggtctacagcga  
tgctacaaaatattcaacaaggaaagtgcctccttctaatagcctggatcggggagtcactgaaaatagatc-  
ttcgtgggtggcttgtacgtta

>Balsas\_INIFAP JSG y LOS 109\_AY108876

-----  
cttgattctgttaaactcttctctaggatagttgtaatagcagttcccttcgagcagatttattcaactagtttggttgta  
cttcttttctagttctagaatgcacattgacctcttagcatgcgacaaaatgagaattaagaaaagaatccctgtctgtg  
gttactcttgagatataattggtgattatgactgtagcccatatgtagcacacctgatagataagctggattatagtttg  
tatggatttctggattgggttgcctgatgcctagttggtgaacgcacactttattctggtaacctctaataccggtttta  
cttttgggtatatcagggattcacaaggtattgccaagaagtgggacaaaattctggcgatcttcatgattggttcttctgctg  
ttgtatcaaagttagtagcgggtctacagcgcgatgcctacaaaatattcaacaaggaaagtg-----  
-----

>Balsas\_INIFAP JSG 378\_AY108876

---  
tgtctgtatcgcctttatccccagctgcatcactttaaggtaacttgattctgttaaactcttctctaggatagttg  
taatagcagttcccttcgagcagatttattcaactagtttggttgtacttcttttctagttctagaatgcacattgacct  
cttagcatgcgacaaaatgagaattaagaaaagaatccctgtctgtgggttactcttgagatataattggtgattatgactg  
tagcccatatgcagcacacctgatagataagctggattatagtttgtatggatttctggattgggtgctgccatgatgcc  
tagttggtgaacgcacactttattccggtaacctctaataccggttttacttttgggtatatcagggattcacaaggtattgcc  
aagaagtgggacaaaattctggcgatcttcatgattggttcttctgctgttgatcaaagttagtagcgggtctacagcgcgatgc  
ctacaaaatattcaacaaggaaagtgcctccttctaatagcctggatcggggagtcactgaaaatagatc-  
ttcgtgggtggcttgtacgtta

>Balsas\_INIFAP JSG 374\_AY108876

tgctgtctgtatcgcctttatccccagctgcatcactttaaggtaacttgattctgttaaactcttctctaggatag  
ttgtaatagcagttcccttcgagcagatatttcaactagtttggttgtacttcttttctagttctagaatgcacattga  
cctcttagcatgcgacaaaatgagaattaagaaaagaatccctgtctgtgggttactcttgagatataattggtgattatga  
ctgtagcccatatgcagcacacctgatagataagctggattatagtttgtatggatttctggattgggtgctgccatgat  
gcctagttggtgaacgcacactttattccggtaacctctaataccggttttacttttgggtatatcagggattcacaaggtatt  
gccaagaagtgggacaaaattctggcgatcttcatgattggttcttctgctgttgatcaaagttagtagcgggtctacagcga  
tgctacaaaatattcaacaaggaaagtgcctccttctaatagcctggatcggggagtcactgaaaatagatc-  
ttcgtgggtggcttgtacgtta

>Balsas\_INIFAP JSG y LOS 161\_AY108876

tgctgtctgtatcgcctttatccccagctgcatcactttaaggtaacttgattctgttaaactcttctctaggatag  
ttgtaatagcagttcccttcgagcagatatttcaactagtttggttgtacttcttttctagttctagaatgcacattga  
cctcttagcatgcgacaaaatgagaattaagaaaagaatccctgtctgtgggttactcttgagatataattggtgattatga  
ctgtagcccatatgcagcacacctgatagataagctggattatagtttgtatggatttctggattgggtgctgccatgat  
gcctagttggtgaaagacactttattccggtaacctctaataccggttttacttttgggtatatcagggattcacaaggtatt  
gccaagaagtgggacaaaattctggcgatcttcatgattggttcttctgctgttgatcaaagttagtagcgggtctacagcga  
tgctacaaaatattcaacaaggaaagtgcctccttctaatagcctggatcggggagtcactgaaaata-----  
-----

>Balsas\_CIMMYT 11355\_AY108876

-----  
atcttctctaggatagttgtaatagcagttcccttcgagcagatttattcaactagtttggttgtacttcttttctagtt  
tctagaatgcacattgacctcttagcatgcgacaaaatgagaattaagaaaataatccctgtctgtgggttactcttgagat  
atatttgggtgattatgactgtagcccatatgcagcacacctgatagataagctggattatagtttataatggatttctgga  
ttgggtgctgccatgatgcctagttggtgaacgcacactttattccggtaacctctaataccggttttacttttgggtatatca  
gggattcacaaggtattgccaagaagtgggacaaaattctggcgatcttcatgattggttcttctgctgttgatcaaagttag  
tagcgggtctacagcgcgatgcctacaaaatattcaacaaggaaagtgcctccttctaatagcctggatcggggagtcactg

aaata-----  
>Jalisco\_INIFAP JSG y MAS 264\_AY108876  
---

tgtctgtatcgccctttatccccagctgcgatcactttaaggtaacttgattctgtttaaactctttctctaggatagttg  
taatagcagttcccttcgagcagatttattcaactagtttggtgtacttcttttctagttctagaatgcacattgacct  
cttagcatgcgacaaatgagaattaagaaaagaatccctgtctgtgggtactcttgagatataatgttgattatgactg  
tagcccatatgagcagcacacctgatagataagctggattatagtttgatggatttctggattgggtgctgcatgatgcc  
tagttggtgaacgacactttatccggtaacatctaactcgttttacttttggtatatacagggattcacaaggattgcc  
aagaagtgggacaaaattctggcgatcttcatgattgttcttgctgtgtatcaaagttagtagcgggtctacagcgatgc  
ctacaaaatattcaacaaggaaagtgtccttctaagtgcctggatcggggagtcaactgaaaatagatc-  
ttcgtggtggcttgtagctta

>Tripsacum\_WW-2120\_AY108876

tgctgtctgtatcgccctttatccccagctgcgatcactttaaggtaacttgattctgtttaaactctttgtctaggatag  
ttgtaatagcagttctcttcctgcgatttattcaactagtttggtgtacttctgtttctagttctagaatgcacattga  
cctcttagcatgtggcaaatgagaattaagaaaagaaccctgtctgtgggtactct-  
aagatataatgttgattatgactgtagcccatatgtagcacacctgatagataagctggattataatgttgattgatt  
ctggattgggtgctgcatgatgttttagttggtgaacaacactttatctggtaacctctaactctgttttacttttggt  
tatcagggatccacaaggcattgccaagaagtgggacaaaattctggcgatcttcatgattgttcttgctgttgatcaa  
atgtagtagcgggtctacagcgatgcctacaaaatattccacaaggaaagtgtccttctaagtgcctgaatcggggagtca  
gctgaaa-tagatc-ttcgtggtggcttgtagctta

>B73\_AY106123

-----ggggggcagactcgtccagtttattattatgcgctgtaagttaaaaaaa-  
tgactgtcttatttgccctttgtacataccatgacattggactataacaatcagagcaatatagtgaaatcccttttcttg  
atgttggttgaaatatgttttccaggagatgcaacaatacagaggaagaaacttttagatataaccattctgaactgctct  
tagatggaagtcgctgcaatccccacaagtgggattttgaccag-  
caaaaaccgctattacaatggaaaaaactggctctg-----ttgtgttgctcggattgggtggacaaaaaa-  
gcgc-accgactttgtgttgctcggattgcctgggtcaaaatgctc

>Oh43\_AY106123

-----ttattatgcgctgtaagttaaaaaaa-  
tgactgtcttatttgccctttgtacataccatgacattggactataacaatcagagcaatatagtgaaatcccttttcttg  
atgttggttgaaatatgttttccaggagatgcaacaatacagaggaagaaacttttagatataaccattctgaactgctct  
tagatggaagtcgctgcaatccccacaagtgggattttgaccag-  
caaaaaccgctattacaatggaaaaaactggctctg-----ttgtgttgctcggattgggtggacaaaaaa-  
gcgc-accgactttgtgttgctcggattgcctgggtcaaaatgctc

>IL14H\_AY106123

aaatgacgattggggggcagactcgtcctggtttattattatgcgctgtaagttaaaaaaa-  
tgactgtcttatttgccctttgtacataccatgacattggactataacaatcagagcaatatagtgaaatcccttttcttg  
atgttggttgaaatatgttttccaggagatgcaacaatacagaggaagaaacttttagatataaccattctgaactgctct  
tagatggaagtcgctgcaatccccacaagtgggattttgaccag-  
caaaaaccgctattacaatggaaaaaactggctctg-----ttgtgttgctcggattgggtggacaaaaaa-  
gcgc-accgactttgtgttgctcggattgcctgggtcaaaatgctc

>Mo17\_AY106123

aaatgacgattggggggcagactcgtcctggtttattattatgcgctgtaagttaaaaaaa-  
tgactgtcttatttgccctttgtacataccatgacattggactataacaatcagagcaatatagtgaaatcccttttcttg  
atgttggttgaaatatgttttccaggagatgcaacaatacagaggaagaaacttttagatataaccattctgaactgctct  
tagatggaagtcgctgcaatccccacaagtgggattttgaccag-  
caaaaaccgctattacaatggaaaaaactggctctg-----ttgtgttgctcggattgggtggacaaaaaa-  
gcgc-accgactttgtgttgctcggattgcctgggtcaaaatgc--

>Ky21\_AY106123

aaatgacgattggggggcagactcgtcctggtttattattatgcgctgtaagttaaaaaaa-  
tgactgtcttatttgccctttgtacataccatgacattggactataacaatcagagcaatatagtgaaatcccttttcttg  
atgttggttgaaatatgttttccaggagatgcaacaatacagaggaagaaacttttagatataaccattctgaactgctct  
tagatggaagtcgctgcaatccccacaagtgggattttgaccag-  
caaaaaccgctattacaatggaaaaaactggctctg-----ttgtgttgctcggattgggtggacaaaaaa-



gcgc-accgactttgtgttgctcggattgcctggtcaaaatgctc  
>M37W\_AY106123  
aaatgacgattggggggcagactcgtcctgtttattattatgcgctgtaagttaaaaaa-  
tgactgtccttatttgctttgtacataccatgacattggactataacaatcagagcaatatagtgaaatcccttttcttg  
atTTTggTtgaaatAtgTTTTcaggagatgcaacaatacagaggaagaaactTTTtagatataccattctgaactgctct  
tagatggaagtcgctgcaatccccacaagtgggattttgaccag-  
caaaaaccgctattacaatggaaaaaactggtcctg-----ttgtgttgctcggattgggtggacaaaaa-  
gcgc-accgactttgtgttgctcggattgcctggtcaaaatgctc  
>HP301\_AY106123  
aaatgacgattggggggcagactcgtcctgtttattattatgcgctgtaagttaaaaaa-  
tgactgtccttatttgctttgtacataccatgacattggactataacaatcagagcaatatagtgaaatcccttttcttg  
atTTTggTtgaaatAtgTTTTcaggagatgcaacaatacagaggaagaaactTTTtagatataccattctgaactgctct  
tagatggaagtcgctgcaatccccacaagtgggattttgaccag-  
caaaaaccgctattacaatggaaaaaactggtcctg-----ttgtgttgctcggattgggtggacaaaaa-  
gcgc-accgactttgtgttgctcggattgcctggtcaaaatgctc  
>CML247\_AY106123  
aaatgacgattggggggcagactcgtcctgtttattattatgcgctgtaagttaaaaaa-  
tgactgtccttatttgctttgtacataccatgacattggactataacaatcagagcaatatagtgaaatcccttttcttg  
atTTTggTtgaaatAtgTTTTcaggagatgcaacaatacagaggaagaaactTTTtagatataccattctgaactgctct  
tagatggaagtcgctgcaatccccacaagtgggattttgaccag-  
caaaaaccgctattacaatggaaaaaactggtcctg-----ttgtgttgctcggattgggtggacaaaaa-  
gcgc-accgactttgtgttgctcggattgcctggtcaaaatgctc  
>NC350\_AY106123  
-----ctcgtccagtttattattatgcgctgtaagttaaaaaa-  
tgactgtccttatttgctttgtacataccatgacattggactataacaatcagagcaatatagtgaaatcccttttcttg  
atTTTggTtgaaatAtgTTTTcaggagatgcaacaatacagaggaagaaactTTTtagatataccattctgaactgctct  
tagatggaagtcgctgcaatccccacaagtgggattttgaccag-  
caaaaaccgctattacaatggaaaaaactggtcctg-----ttgtgttgctcggattgggtggacaaaaa-  
gcgc-accgactttgtgttgctcggattgcctggtcaaaatgctc  
>Ki3\_AY106123  
-----ctcgtcctgtttattattatgcgctgtaagttaaaaaa-  
tgactgtccttatttgctttgtacataccatgacattggactataacaatcagagcaatatagtgaaatcccttttcttg  
atTTTggTtgaaatAtgTTTTcaggagatgcaacaatacagaggaagaaactTTTtagatataccattctgaactgctct  
tagatggaagtcgctgcaatccccacaagtgggattttgaccag-  
caaaaaccgctattacaatggaaaaaactggtcctg-----ttgtgttgctcggattgggtggacaaaaa-  
gcgc-accgactttgtgttgctcggattgcctggtcaaaatgctc  
>Kill\_AY106123  
aaatgacgattggggggcagactcgtcctgtttattattatgcgctgtaagttaaaaaa-  
tgactgtccttatttgctttgtacataccatgacattggactataacaatcagagcaatatagtgaaatcccttttcttg  
atTTTggTtgaaatAtgTTTTcaggagatgcaacaatacagaggaagaaactTTTtagatataccattctgaactgctct  
tagatggaagtcgctgcaatccccacaagtgggattttgaccag-  
caaaaaccgctattacaatggaaaaaactggtcctg-----ttgtgttgctcggattgggtggacaaaaa-  
gcgc-accgactttgtgttgctcggattgcctggtcaaaatgctc  
>CML333\_AY106123  
-----ctcgtccagtttattattatgcgctgtaagttaaaaaa-  
tgactgtccttatttgctttgtacataccatgacattggactataacaatcagagcaatatagtgaaatcccttttcttg  
atTTTggTtgaaatAtgTTTTcaggagatgcaacaatacagaggaagaaactTTTtagatataccattctgaactgctct  
tagatggaagtcgctgcaatccccacaagtgggattttgaccag-  
caaaaaccgctattacaatggaaaaaactggtcctg-----ttgtgttgctcggattgggtggacaaaaa-  
gcgc-accgactttgtgttgctcggattgcctggtcaaaatgctc  
>CML322\_AY106123  
-----ggggggcagactcgtcctgtttattattatgcgctgtaagttaaaaaa-  
tgactgtccttatttgctttgtacataccatgacattggactataacaatcagagcaatatagtgaaatcccttttcttg  
atTTTggTtgaaatAtgTTTTcaggagatgcaacaatacagaggaagaaactTTTtagatataccattctgaactgctct  
tagatggaagtcgctgcaatccccacaagtgggattttgaccag-  
caaaaaccgctattacaatggaaaaaactggtcctg-----ttgtgttgctcggattgggtggacaaaaa-  
gcgc-accgactttgtgttgctcggattgcctggtcaaaatgctc

>CML69\_AY106123

--atgacgattggggggcagactcgtcctgtttattattatgcgctgtaagttaaaaaaa-  
tgactgtccttatttgcctttgtacataccatgacattggactataacaatcagagcaatatagtgaaatcccttttcttg  
attttgggttgaaatatgtttttcaggagatgcaacaatacagaggaagaaacttttagatataaccattctgaactgctct  
tagatggaagtcgctgcaatccccacaagtgggattttgaccag-  
caaaaaccgctattacaatggaaaaaactggctctg-----ttgtgttgctcggattgggtggacaaaaaa-  
gcgc-accgactttgtgttgctcggattgccc-----

>Assinboine\_PI213793\_AY106123

aatgacgattggggggcagactcgtcctgtttattattatgcgctgtaagttaaaaaaa-  
tgactgtccttatttgcctttgtacataccatgacattggactataacaatcagagcaatatagtgaaatcccttttcttg  
attttgggttgaaatatgtttttcaggagatgcaacaatacagaggaagaaacttttagatataaccattctgaactgctct  
tagatggaagtcgctgcaatccccacaagtgggattttgaccag-  
caaaaaccgctattacaatggaaaaaactggctctg-----ttgtgttgctcggattgggtggacaaaaaa-  
gcgc-accgactttgtgttgctcggattgccc-----

>Guirua\_MAG 450\_AY106123

aatgacgattggggggcagactcgtccagtttattattatgcgctgtaagttaaaaaaa-  
tgactgtccttatttgcctttgtacataccatgacattggactataacaatcagagcaatatagtgaaatcccttttcttg  
attttgggttgaaatatgtttttcaggagatgcaacaatacagaggaagaaacttttagatataaccattctgaactgctct  
tagatggaagtcgctgcaatccccacaagtgggattttgaccag-  
caaaaaccgctattacaatggaaaaaactggctctg-----ttgtgttgctcggattgggtggacaaaaaa-  
gcgc-accgactttgtgttgctcggattgccc-----

>Nal-tel\_YUC 7\_AY106123

aatgacgattggggggcagactcgtcctgtttattattatgcgctgtaagttaaaaaaa-  
tgactgtccttatttgcctttgtacataccatgacattggactataacaatcagagcaatatagtgaaatcccttttcttg  
attttgggttgaaatatgtttttcaggagatgcaacaatacagaggaagaaacttttagatataaccattctgaactgctct  
tagatggaagtcgctgcaatccccacaagtgggattttgaccag-  
caaaaaccgctattacaatggaaaaaactggctctg-----ttgtgttgctcggattgggtggacaaaaaa-  
gcgc-accgactttgtgttgctcggattgccc-----

>Pisscotunto\_APC 13\_AY106123

aatgacgattggggggcagactcgtcctgtttattattatgcgctgtaagttaaaaaaa-  
tgactgtccttatttgcctttgtacataccatgacattggactataacaatcagagcaatatagtgaaatcccttttcttg  
attttgggttgaaatatgtttttcaggagatgcaacaatacagaggaagaaacttctagatataactattctgaactgctct  
tagatggaagtcgctgcaatccccacaagtgggattatgaccag-  
caaaaaccgctattacaatggaaaaaactggctctg-----ttgtgttgctcggattgggtggacaaaaaa-  
gccccaccgact--gtgttgctcggattgccc-----

>Sabanero\_SAN 329\_AY106123

aatgacgattggggggcagactcgtcctgtttattattatgcgctgtaagttaaaaaaa-  
tgactgtccttatttgcctttgtacataccatgacattggactataacaatcagagcaatatagtgaaatcccttttcttg  
attttgggttgaaatatgtttttcaggagatgcaacaatacagaggaagaaacttttagatataaccattctgaactgctct  
tagatggaagtcgctgcaatccccacaagtgggattttgaccag-  
caaaaaccgctattacaatggaaaaaactggctctg-----ttgtgttgctcggattgggtggacaaaaaa-  
gcgc-accgactttgtgttgctcggattgccc-----

>Serrano\_GUA 14\_AY106123

aatgacgattggggggcagactcgtccagtttattattatgcgctgtaagttaaaaaaa-  
tgactgtccttatttgcctttgtacataccatgacattggactataacaatcagagcaatatagtgaaatcccttttcttg  
attttgggttgaaatatgtttttcaggagatgcaacaatacagaggaagaaacttttagatataaccattctgaactgctct  
tagatggaagtcgctgcaatccccacaagtgggattttgaccag-  
caaaaaccgctattacaatggaaaaaactggctctg-----ttgtgttgctcggattgggtggacaaaaaa-  
gcgc-accgactttgtgttgctcggattgccc-----

>Bolita\_OAX 68\_AY106123

aatgacgattggggggcagactcgtcctgtttattattatgcgctgtaagttaaaaaaa-  
tgactgtccttatttgcctttgtacataccatgacattggactataacaatcagagcaatatagtgaaatcccttttcttg  
attttgggttgaaatatgtttttcaggagatgcaacaatacagaggaagaaacttttagatataaccattctgaactgctct  
tagatggaagtcgctgcaatccccacaagtgggattttgaccag-  
caaaaaccgctattacaatggaaaaaactggctctg-----ttgtgttgctcggattgggtggacaaaaaa-  
gcgc-accgactttgtgttgctcggattgccc-----

>Cateto Sulino\_URG 11\_AY106123

aaatgacgattggggggcagactcgtcctgtttattattatgcgctgtaagttaaaaaaa-  
tgactgtccttatttgcctttgtacataccatgacattggactataacaatcagagcaatatagtgaaatcccttttcttg  
atthttggttgaaatatgtthtttcaggagatgcaacaatacagaggaagaaactthtttagatataccattctgaaactgctct  
tagatggaagtcgctgcaatccccacaagtgggattttgaccag-  
caaaaaccgctattacaatggaaaaaactggtcctg-----ttgtgttgctcggattgggtggacaaaaaa-  
gcgc-accgactttgtgttgctcggattgcctgggtcaaaatgctc

>Chalqueno\_MEX 48\_AY106123

aaatgacgattggggggcagactcgtcctgtttattattatgcgctgtaagttaaaaaaa-  
tgactgtccttatttgcctttgtacataccatgacattggactataacaatcagagcaatatagtgaaatcccttttcttg  
atthttggttgaaatatgtthtttcaggagatgcaacaatacagaggaagaaactthtttagatataccattctgaaactgctct  
tagatggaagtcgctgcaatccccacaagtgggattttgaccag-  
caaaaaccgctattacaatggaaaaaactggtcctg-----ttgtgttgctcggattgggtggacaaaaaa-  
gcgc-accgactttgtgttgctcggattgcctgggtcaaaatgctc

>Chapalote\_SIN 2\_AY106123

aaatgacgattggggggcagactcgtcctgtttattattatgcgctgtaagttaaaaaaa-  
tgactgtccttatttgcctttgtacataccatgacattggactataacaatcagagcaatatagtgaaatcccttttcttg  
atthttggttgaaatatgtthtttcaggagatgcaacaatacagaggaagaaactthtttagatataccattctgaaactgctct  
tagatggaagtcgctgcaatccccacaagtgggattttgaccag-  
caaaaaccgctattacaatggaaaaaactggtcctg-----ttgtgttgctcggattgggtggacaaaaaa-  
gcgc-accgactttgtgttgctcggattgcctgggtcaaaatgctc

>Conico\_PUE 32\_AY106123

aaatgacgattggggggcagactcgtccagtttattattatgcgctgtaagttaaaaaaa-  
tgactgtccttatttgcctttgtacataccatgacattggactataacaatcagagcaatatagtgaaatcccttttcttg  
atthttggttgaaatatgtthtttcaggagatgcaacaatacagaggaagaaactthtttagatataccattctgaaactgctct  
tagatggaagtcgctgcaatccccacaagtgggattttgaccag-  
caaaaaccgctattacaatggaaaaaactggtcctg-----ttgtgttgctcggattgggtggacaaaaaa-  
gcgc-accgactttgtgttgctcggattgcctgggtcaaaatgctc

>Costeno\_VEN 453\_AY106123

aaatgacgattggggggcagactcgtcctgtttattattatgcgctgtaagttaaaaaaa-  
tgactgtccttatttgcctttgtacataccatgacattggactataacaatcagagcaatatagtgaaatcccttttcttg  
atthttggttgaaatatgtthtttcaggagatgcaacaatacagaggaagaaactthtttagatataccattctgaaactgctct  
tagatggaagtcgctgcaatccccacaagtgggattttgaccag-  
caaaaaccgctattacaatggaaaaaactggtcctg-----ttgtgttgctcggattgggtggacaaaaaa-  
gcgc-accgactttgtgttgctcggattgcctgggtcaaaatgctc

>Cristalino Norteno\_CHI 349\_AY106123

aaatgacgattggggggcagactcgtcctgtttattattatgcgctgtaagttaaaaaaa-  
tgactgtccttatttgcctttgtacataccatgacattggactataacaatcagagcaatatagtgaaatcccttttcttg  
atthttggttgaaatatgtthtttcaggagatgcaacaatacagaggaagaaactthtttagatataccattctgaaactgctct  
tagatggaagtcgctgcaatccccacaagtgggattttgaccag-  
caaaaaccgctattacaatggaaaaaactggtcctg-----ttgtgttgctcggattgggtggacaaaaaa-  
gcgc-accgactttgtgttgctcggattgcctgggtcaaaatgctc

>Dzit Bacal\_GUA 131\_AY106123

aaatgacgattggggggcagactcgtcctgtttattattatgcgctgtaagttaaaaaaa-  
tgactgtccttatttgcctttgtacataccatgacattggactataacaatcagagcaatatagtgaaatcccttttcttg  
atthttggttgaaatatgtthtttcaggagatgcaacaatacagaggaagaaactthtttagatataccattctgaaactgctct  
tagatggaagtcgctgcaatccccacaagtgggattttgaccag-  
caaaaaccgctattacaatggaaaaaactggtcctg-----ttgtgttgctcggattgggtggacaaaaaa-  
gcgc-accgactttgtgttgctcggattgcctgggtcaaaatgctc

>Jalisco\_Benz 967\_AY106123

aaatgacgattggggggcagactcgtcctgtttattattatgcgctgtaagttaaaaaaa-  
tgactgtccttatttgcctttgtacataccatgacattggactataacaatcagagcaatatagtgaaatcccttttcttg  
atthttggttgaaatatgtthtttcaggagatgcaacaatacagaggaagaaactthtttagatataactattctgaaactgctct  
tagatggaagtcgctgcaatccccacaagtgggattatgaccag-  
caaaaaccgctattacaatggaaaaaactggtcctg-----ttgtgttgctcggattgggtggacaaaaaa-  
gccccaccgactttgtgttgctcggattgcctgggtcaaaatgctc

>Balsas\_Kato Site 4\_AY106123

aaatgacgattggggggcagactcgtcctgtttattattatgcgctgtaagttaaaaaaa-

tgactgtccttattttgcctttgtacataccatgacattggactataacaatcagagcaatatagtgaaatcccttttcttg  
atthttgattgaaatatgtttttcaggagatgcaacaatacagaggaagaaacttttagatataaccattctgaaactgctct  
tagatggaagtcgctgcaatccccacaagtgggattttgaccag-  
caaaaaccgctattacaatggaaaaaactggctctg-----ttgtgttgctcggattgggtggacaaaaaa-  
gcgc-accgactttgtgttgctcggattgcctgggtcaaaatgctc  
>Balsas\_Wilkes Site 6\_AY106123  
aaatgacgattggggggcagactcgtcctgctttattattatgcgctgtaagttaaaaaaa-  
tgactgtccttattttgcctttgtacataccatgacattggactataacaatcagagcaatatagtgaaatcccttttcttg  
atthttggttgaaatatgtttttcaggagatgcaacaatacagaggaagaaacttttagatataactattctgaaactgctct  
tagatggaagtcgctgcaatccccacaagtgggattatgaccag-  
caaaaaccgctattacaatggaaaaaactggctctg-----ttgtgttgctcggattgggtggacaaaaaa-  
gccccaccgactttgtgttgctcggattgcctgggtcaaaatgctc  
>Balsas\_INIFAP JSP y Lo5130\_AY106123  
aaatgacgattggggggcagactcgtcctgctttattattatgcgctgtaagttaaaaaaa-  
tgactgtccttattttgcctttgtacataccatgacattggactataacaatcagagcaatatagtgaaatcccttttcttg  
atthttggttgaaatatgtttttcaggagatgcaacaatacagaggaagaaacttttagatataaccattctgaaactgctct  
tagatggaagtcgctgcaatccccacaagtgggattttgaccag-  
caaaaaccgctattacaatggaaaaaactggctctg-----ttgtgttgctcggattgggtggacaaaaaa-  
gcgc-accgactttgtgttgctcggattgcctgggtcaaaatgctc  
>Balsas\_INIFAP JSG y LOS 119\_AY106123  
aaatgacgattggggggcagactcgtcctgctttattattatgcgctgtaagttaaaaaaa-  
tgactgtccttattttgcctttgtacataccatgacattggactataacaatcagagcaatatagtgaaatcccttttcttg  
atthttggttgaaatatgtttttcaggagatgcaacaatacagaggaagaaacttttagatataaccattctgaaactgctct  
tagatggaagtcgctgcaatccccacaagtgggattttgaccag-  
caaaaaccgctattacaatggaaaaaactggctctg-----ttgtgttgctcggattgggtggacaaaaaa-  
gcgc-accgactttgtgttgctcggattgcctgggtcaaaatgctc  
>Jalisco\_INIFAP JSG y MAS 401\_AY106123  
aaatgacgattggggggcagactcgtcctgctttattattatgcgctgtaagttaaaaaaa-  
tgactgtccttattttgcctttgtacataccatgacattggactataacaatcagagcaatatagtgaaatcccttttcttg  
atthttggttgaaatatgtttttcaggagatgcaacaatacagaggaagaaacttttagatataactattctgaaactgctct  
tagatggaagtcgctgcaatccccacaagtgggattatgaccag-  
caaaaaccgctattacaatggaaaaaactggctctg-----ttgtgttgctcggattgggtggacaaaaaa-  
gccccaccgactttgtgttgctcggattgcctgggtcaaaatgctc  
>Balsas\_CIMMYT 8783\_AY106123  
aaatgacgattggggggcagactcgtcctgctttattattatgcgctgtaagttaaaaaaa-  
tgactgtccttattttgcctttgtacataccatgacattggactataacaatcagagcaatatagtgaaatcccttttcttg  
atthttggttgaaatatgtttttcaggagatgcaacaatacagaggaagaaacttttagatataaccattctgaaactgctct  
tagatggaagtcgctgcaatccccacaagtgggattttgaccag-  
caaaaaccgctattacaatggaaaaaactggctctg-----ttgtgttgctcggattgggtggacaaaaaa-  
gcgc-accgactttgtgttgctcggattgcctgggtcaaaatgctc  
>Oaxaca\_INIFAP JSG 197\_AY106123  
aaatgacgattggggggcagactcgtcctgctttattattatgcgctgtaagttaaaaaaa-  
tgactgtccttattttgcctttgtacataccatgacattggactataacaatcagagcaatatagtgaaatcccttttcttg  
atthttggttgaaatatgtttttcaggagatgcaacaatacagaggaagaaacttttagatataaccattctgaaactgctct  
tagatggaagtcgctgcaatccccacaagtgggattttgaccag-  
caaaaaccgctattacaatggaaaaaactggctctg-----ttgtgttgctcggattgggtggacaaaaaa-  
gcgc-accgactttgtgttgctcggattgcctgggtcaaaatgctc  
>Balsas\_INIFAP JSG y LOS 109\_AY106123  
aaatgacgattggggggcagactcgtcctgctttattattatgcgctgtaagttaaaaaaaatgactgtccttattttgcct  
ttgtacataccatgacattggactataacaatcagagcaatatagtgaaatcccttttcttgatthttggttgaaatatgt  
ttttcaggagatgcaacaatacagaggaagaaacttttagatataactattctgaaactgctcttagatggaagtcgctgca  
atccccacaagtgggattatgaccag-caaaaaccgctattacaatggaaaaaactggctctg-----  
ttgtgttgctcggattgggtggacaaaaaaagccccaccgactttgtgttgctcggattgcctgggtcaaaatgctc  
>Balsas\_INIFAP JSG  
378\_AY106123\_225851aaatgacgattggggggcagactcgtcctgctttattattatgcgctgtaagttaaaaaaa  
-  
tgactgtccttattttgcctttgtacataccatgacattggactataacaatcagagcaatatagtgaaatcccttttcttg



ttatgaaagccattgaatcaaataagaatgtagttgaagtttcacctgaggaagctgcctgggcagattcatgcttcgtg  
cagacttctgaactgtcatatgatgactgggg-  
agcgatgaggagtagctgcttgatgccctcgaaaagccaacagaaagtcccagtgatacttcagaaagtgacataatg  
caatctcagaggcaaaacctcactcccttcctgctgaaaacatttctgagcatggcgacatccacatggagcaataaac  
aataccgatgatgacaaggatggtactgaagcttttgaattgctgatgtaatcagacgtgtagacgataatggtaagca  
aattgatagttat

>IL14H\_AY106190

-----

caaataagaatgtagttgaagtttcacctgaggaagctgcctgggcagattcatgcttcgtgcagacttctgaactgtca  
tatgatgactgggg-  
agcgatgaggagtagctgcttgatgccctcgaaaagccaacagaaagtcccagtgatacttcagaaagtgacataatg  
caatctcagaggcaaaacctcactcccttcctgctgaaaacatttctgagcatggcgacatccacatggagcaataaac  
aataccgatgatgacaaggatggtactgaagcttttgaattgctgatgtaatcagacgtgtagacgataatggtaagca  
aattga-----

>Mo17\_AY106190

ttatgaaagccattgaatcaaataagaatgtagttgaagtttcacctgaggaagctgcctgggcagattcatgcttcgtg  
cagacttctgaactgtcatatgatgactgggg-  
agcgatgaggagtagctgcttgatgccctcgaaaagccaacagaaagtcccagtgatacttcagaaagtgacataatg  
caatctcagaggcaaaacctcactcccttcctgctgaaaacatttctgagcatggcgacatccacatggagcaataaac  
aataccgatgatgacaaggatggtactgaagcttttgaattgctgatgtaatcagacgtgtagacgataatggtaagca  
aattgatagttat

>Ky21\_AY106190

----

gaaagccattgaatcaaataagaatgtagttgaagtttcacctgaggaagctgcctgggcagattcatgcttcgtgcaga  
cttctgaactgtcatatgatgactgggg-  
agcgatgaggagtagctgcttgatgccctcgaaaagccaacagaaagtcccagtgatacttcagaaagtgacataatg  
caatctcagaggcaaaacctcactcccttcctgctgaaaacatttctgagcatggcgacatccacatggagcaataaac  
aataccgatgatgacaaggatggtactgaagcttttgaattgctgatgtaatcagacgtgtagacgataatggtaagca  
aattga-----

>M37W\_AY106190

ttatgaaagccattgaatcaaataagaatgtagttgaagtttcacctgaggaagctgcctgggcagattcatgcttcgtg  
cagacttctgaactgtcatatgatgactgggg-  
agcgatgaggagtagctgcttgatgccctcgaaaagccaacagaaagtcccagtgatacttcagaaagtgacataatg  
caatctcagaggcaaaacctcactcccttcctgctgaaaacatttctgagcatggcgacatccacatggagcaataaac  
aataccgatgatgacaaggatggtactgaagcttttgaattgctgatgtaatcagacgtgtagacgataatggtaagca  
aattga-----

>HP301\_AY106190

ttatgaaagccattgaatcaaataagaatgtagttgaagtttcacctgaggaagctgcctgggcagattcatgcttcgtg  
cagacttctgaactgtcatatgatgactgggg-  
agcgatgaggagtagctgcttgatgccctcgaaaagccaacagaaagtcccagtgatacttcagaaagtgacataatg  
caatctcagaggcaaaacctcactcccttcctgctgaaaacatttctgagcatggcgacatccacatggagcaataaac  
aataccgatgatgacaaggatggtactgaagcttttgaattgctgatgtaatcagacgtgtagacgataatggtaagca  
aattgatagttat

>CML247\_AY106190

---

tgaaagccattgaatcaaataagaatgtagttgaagtttcacctgaggaagctgcctgggcagattcatgcttcgtgcag  
acttctgaactgtcatatgatgactgggg-  
agcgatgaggagtagctgcttgatgccctcgaaaagccaacagaaagtcccagtgatacttcagaaagtgacataatg  
caatctcagaggcaaaacctcactcccttcctgctgaaaacatttctgagcatggcgacatccacatggagcaataaac  
aataccgatgatgacaaggatggtactgaagcttttgaattgctgatgtaatcagacgtgtagacgataatggtaagca  
aattgatagttat

>NC350\_AY106190

---

tgaaagccattgaatcaaataagaatgtagttgaagtttcacctgaggaagctgcctgggcagattcatgcttcgtgcag  
acttctgaactgtcatatgatgactgggg-  
agcgatgaggagtagctgcttgatgccctcgaaaagccaacagaaagtcccagtgatacttcagaaagtgacataatg  
caatctcagaggcaaaacctcactcccttcctgctgaaaacatttctgagcatggcgacatccacatggagcaataaac

aataccgatgatgacaaggatggtactgaagcttttgaattgctgatgtaatcagacgtgtagacgataat-----  
-----

>Ki3\_AY106190

ttatgaaagccattgaatcaaataagaatgtagttgaagtttcacctgaggaagctgcctgggcagattcatgcttcgtg  
cagacttctgaactgtcatatgatgactgggg-  
agcgatgaggagtatgctgcttgatgccctcgaaaagccaacagaaagtcccagtgatacttcagaaagtgcacataatg  
caatctcagaggcaaaacctcactcccttcctgctgaaaacatttctgagcatggcgacatccacatggagcaataaac  
aataccgatgatgacaaggatggtactgaagcttttgaattgctgatgtaatcagacgtgtagacgataatggtaagca  
aattgatagttat

>Kill\_AY106190

-

tatgaaagccattgaatcaaataagaatgtagttgaagtttcacctgaggaagctgcctgggcagattcatgcttcgtg  
agacttctgaactgtcatatgatgactgggg-  
agcgatgaggagtatgctgcttgatgccctcgaaaagccaacagaaagtcccagtgatacttcagaaagtgcacataatg  
caatctcagaggcaaaacctcactcccttcctgctgaaaacatttctgagcatggcgacatccacatggagcaataaac  
aataccgatgatgacaaggatggtactgaagcttttgaattgctgatgtaatcagacgtgtagacgataat-----  
-----

>CML333\_AY106190

-----

caaataagaatgtagttgaagtttcacctgaggaagctgcctgggcagattcatgcttcgtgcagacttctgaactgtca  
tatgatgactgggg-  
agcgatgaggagtatgctgcttgatgccctcgaaaagccaacagaaagtcccagtgatacttcagaaagtgcacataatg  
caatctcagaggcaaaacctcactcccttcctgctgaaaacatttctgagcatggcgacatccacatggagcaataaac  
aataccgatgatgacaaggatggtactgaagcttttgaattgctgatgtaatcagacgtgtagacgataatggtaagca  
aattga-----

>CML322\_AY106190

---

tgaaagccattgaatcaaataagaatgtagttgaagtttcacctgaggaagctgcctgggcagattcatgcttcgtgcag  
acttctgaactgtcatatgatgactgggg-  
agcgatgaggagtatgctgcttgatgccctcgaaaagccaacagaaagtcccagtgatacttcagaaagtgcacataatg  
caatctcagaggcaaaacctcactcccttcctgctgaaaacatttctgagcatggcgacatccacatggagcaataaac  
aataccgatgatgacaaggatggtactgaagcttttgaattgctgatgtaatcagacgtgtagacgataatggtaagca  
aattgatagttat

>CML69\_AY106190

ttatgaaagccattgaatcaaataagaatgtagttgaagtttcacctgaggaagctgcctgggcagattcatgcttcgtg  
cagacttctgaactgtcatatgatgactgggg-  
agcgatgaggagtatgctgcttgatgccctcgaaaagccaacagaaagtcccagtgatacttcagaaagtgcacataatg  
caatctcagaggcaaaacctcactcccttcctgctgaaaacatttctgagcatggcgacatccacatggagcaataaac  
aataccgatgatgacaaggatggtactgaagcttttgaattgctgatgtaatcagacgtgtagacgataatggtaagca  
aattgata-----

>Assinboine\_PI213793\_AY106190

ttatgaaagccattgaatcaaataagaatgtagttgaagtttcacctgaggaagctgcctgggcagattcatgcttcgtg  
cagacttctgaactgtcatatgatgactgggg-  
agcgatgaggagtatgctgcttgatgccctcgaaaagccaacagaaagtcccagtgatacttcagaaagtgcacataatg  
caatctcagaggcaaaacctcactcccttcctgctgaaaacatttctgagcatggcgacatccacatggagcaataaac  
aataccgatgatgacaaggatggtactgaagcttttgaattgctgatgtaatcagacgtgtagacgataatggtaagca  
aattgatagttat

>Gordo\_CHH 160\_AY106190

ttatgaaagccattgaatcaaataagaatgtagttgaagtttcacctgaggaagctgcctgggcagattcatgcttcgtg  
cagacttctgaactgtcatatgatgactgggg-  
agcgatgaggagtatgctgcttgatgccctcgaaaagccaacagaaagtcccagtgatacttcagaaagtgcacataatg  
caatctcagaggcaaaacctcactcccttcctgctgaaaacatttctgagcatggcgacatccacatggagcaataaac  
aataccgatgatgacaaggatggtactgaagcttttgaattgctgatgtaatcagacgtgtagacgataatggtaagca  
aattgatagttat

>Guirua\_MAG 450\_AY106190

ttatgaaagccattgaatcaaataagaatgtagttgaagtttcacctgaggaagctgcctgggcagattcatgcttcgtg  
cagacttctgaactgtcatatgatgactgggg-

agcgatgaggagtatgctgcttgatgccctcgaaaagccaacagaaagtcccagtgatacttcagaaagtgacataatg  
caatctcagaggcaaaacctcactcccttctgctgaaaacatttctgagcatggcgacatccacatggagcaataaac  
aataccgatgatgacaaggatggtactgaagcttttgaaattgctgatgtaatcagacgtgtagacgataatggtaagca  
aattgatagttat

>Nal-tel\_YUC 7\_AY106190

ttatgaaagccattgaatcaaataagaatgtagttgaagttcacctgaggaagctgcctgggagattcatgcttcgtg  
cagacttctgaactgtcatacgatgactgggg-

agcgatgaggagtatgctgcttgatgccctcgaaaagccaacagaaagtcccagtgatacttcagaaagtgacataatg  
caatctcagaggcaaaacctcactcccttctgctgaaaacatttctgagcatggcgacatccacatggagcaataaac  
aataccgatgatgacaaggatggtactgaagcttttgaaattgctgatgtaatcagacgtgtagacgataatggtaagca  
aattgatagttat

>Pisscotunto\_APC 13\_AY106190

ttatgaaagccattgaatcaaataagaatgtagttgaagttcacctgaggaagctgcctgggagattcatgcttcgtg  
cagacttctgaactgtcatatgatgactgggg-

agcgatgaggagtatgctgcttgatgccctcgaaaagccaacagaaagtcccagtgatacttcagaaagtgacataatg  
caatctcagaggcaaaacctcactcccttctgctgaaaacatttctgagcatggcgacatccacatggagcaataaac  
aataccgatgatgacaaggatggtactgaagcttttgaaattgctgatgtaatcagacgtgtagacgataatggtaagca  
aattgatagttat

>Sabanero\_SAN 329\_AY106190

ttatgaaagccattgaatcaaataagaatgtagttgaagttcacctgaggaagctgcctgggagattcatgcttcgtg  
cagacttctgaactgtcatatgatgactgggg-

agcgatgaggagtatgctgcttgatgccctcgaaaagccaacagaaagtcccagtgatacttcagaaagtgacataatg  
caatctcagaggcaaaacctcactcccttctgctgaaaacatttctgagcatggcgacatccacatggagcaataaac  
aataccgatgatgacaaggatggtactgaagcttttgaaattgctgatgtaatcagacgtgtagacgataatggtaagca  
aattgatagttat

>Bolita\_OAX 68\_AY106190

ttatgaaagccattgaatcaaataagaatgtagttgaagttcacctgaggaagctgcctgggagattcatgcttcgtg  
cagacttctgaactgtcatatgatgactgggg-

agcgatgaggagtatgctgcttgatgccctcgaaaagccaacagaaagtcccagtgatacttcagaaagtgacataatg  
caatctcagaggcaaaacctcactcccttctgctgaaaacatttctgagcatggcgacatccacatggagcaataaac  
aataccgatgatgacaaggatggtactgaagcttttgaaattgctgatgtaatcagacgtgtagacgataatggtaagca  
aattgatagttat

>Cateto Sulino\_URG 11\_AY106190

ttatgaaagccattgaatcaaataagaatgtagttgaagttcacctgaggaagctgcctgggagattcatgcttcgtg  
cagacttctgaactgtcatatgatgactgggg-

agcgatgaggagtatgctgcttgatgccctcgaaaagccaacagaaagtcccagtgatacttcagaaagtgacataatg  
caatctcagaggcaaaacctcactcccttctgctgaaaacatttctgagcatggcgacatccacatggagcaataaac  
aataccgatgatgacaaggatggtactgaagcttttgaaattgctgatgtaatcagacgtgtagacgataatggtaagca  
aattgatagttat

>Chalqueno\_MEX 48\_AY106190

ttatgaaagccattgaatcaaataagaatgtagttgaagttcacctgaggaagctgcctgggagattcatgcttcgtg  
cagacttctgaactgtcatacgatgactgggg-

agcgatgaggagtatgctgcttgatgccctcgaaaagccaacagaaagtcccagtgatacttcagaaagtgacataatg  
caatctcagaggcaaaacctcactcccttctgctgaaaacatttctgagcatggcgacatccacatggagcaataaac  
aataccgatgatgacaaggatggtactgaagcttttgaaattgctgatgtaatcagacgtgtagacgataatggtaagca  
aattgatagttat

>Chapalote\_SIN 2\_AY106190

ttatgaaagccattgaatcaaataagaatgtagttgaagttcacctgaggaagctgcctgggagattcatgcttcgtg  
cagacttctgaactgtcatatgatgactgggg-

agcgatgaggagtatgctgcttgatgccctcgaaaagccaacagaaagtcccagtgatacttcagaaagtgacataatg  
caatctcagaggcaaaacctcactcccttctgctgaaaacatttctgagcatggcgacatccacatggagcaataaac  
aataccgatgatgacaaggatggtactgaagcttttgaaattgctgatgtaatcagacgtgtagacgataatggtaagca  
aattgatagttat

>Conico\_PUE 32\_AY106190

ttatgaaagccattgaatcaaataagaatgtagttgaagttcacctgaggaagctgcctgggagattcatgcttcgtg  
cagacttctgaactgtcatatgatgactgggg-

agcgatgaggagtatgctgcttgatgccctcgaaaagccaacagaaagtcccagtgatacttcagaaagtgacataatg



caatctcagaggcaaaacctcactcccttcctgctgaaaacattttctgagcatggcgacatccacatggagcaaataaac  
aataccgatgatgacaaggatggtactgaagcttttgaaattgctgatgtaatcagacgtgtagacgataatggtaagca  
aattgatagttat

>Costeno\_VEN 453\_AY106190

ttatgaaagccattgaatcaaataagaatgtagttgaagttcacctgaggaagctgcctgggcagattcatgcttcgtg  
cagacttctgaactgtcatatgatgactgggg-  
agcgatgaggagtatgctgcttgatgccctcgaaaagccaacagaaagtcccagtgatacttcagaaagtgcacataatg  
caatctcagaggcaaaacctcactcccttcctgctgaaaacattttctgagcatggcgacatccacatggagcaaataaac  
aataccgatgatgacaaggatggtactgaagcttttgaaattgctgatgtaatcagacgtgtagacgataatggtaagca  
aattgatagttat

>Cristalino Norteno\_CHI 349\_AY106190

ttatgaaagccattgaatcaaataagaatgtagttgaagttcacctgaggaagctgcctgggcagattcatgcttcgtg  
cagacttctgaactgtcatatgatgactgggg-  
agcgatgaggagtatgctgcttgatgccctcgaaaagccaacagaaagtcccagtgatacttcagaaagtgcacataatg  
caatctcagaggcaaaacctcactcccttcctgctgaaaacattttctgagcatggcgacatccacatggagcaaataaac  
aataccgatgatgacaaggatggtactgaagcttttgaaattgctgatgtaatcagacgtgtagacgataatggtaagca  
aattgatagttat

>Dzit Bacal\_GUA 131\_AY106190

ttatgaaagccattgaatcaaataagaatgtagttgaagttcacctgaggaagctgcctgggcagattcatgcttcgtg  
cagacttctgaactgtcatatgatgactgggg-  
agcgatgaggagtatgctgcttgatgccctcgaaaagccaacagaaagtcccagtgatacttcagaaagtgcacataatg  
caatctcagaggcaaaacctcactcccttcctgctgaaaacattttctgagcatggcgacatccacatggagcaaataaac  
aataccgatgatgacaaggatggtactgaagcttttgaaattgctgatgtaatcagacgtgtagacgataatggtaagca  
aattgatagttat

>Jalisco\_Benz 967\_AY106190

-----  
tgaagtttcacctgaggaagctgcctgggcagattcatgcttcgtgcagacttctgaactgtcatatgatgactggggg-  
gcgatgaggagtatgctgcttgatgccctcgaaaagccaacagaaagtcccagtgatacttcagaaagtgcacataatgc  
aatctcagaggcaaaacctcactcccttcctgctgaaaacattttctgagcatggcgacatccacatggagcaaataaaca  
ataccgatgatgacaaggatggtactgaagcttttgaaattgctgatgtaatcagacgtgtagacgataatggtaagcaa  
attgatagttat

>Balsas\_Beadle & Kato Site 4\_AY106190

ttatgaaagccattgaatcaaataagaatgtagttgaagttcacctgaggaagctgcctgggcagattcatgcttcgtg  
cagacttctgaactgtcatatgatgactgggg-  
agcgatgaggagtatgctgcttgatgccctcgaaaagccaacagaaagtcccagtgatacttcagaaagtgcacataatg  
caatctcagaggcaaaacctcactcccttcctgctgaaaacattttctgagcatggcgacatccacatggagcaaataaac  
aataccgatgatgacaaggatggtactgaagcttttgaaattgctgatgtaatcagacgtgtagacgataatgataagca  
aattgatagttat

>Balsas\_Kato Site 4\_AY106190

ttatgaaagccattgaatcaaataagaatgtagttgaagttcacctgaggaagctgcctgggcagattcatgcttcgtg  
cagacttctgaactgtcatatgatgactgggg-  
agcgatgaggagtatgctgcttgatgccctcgaaaagccaacagaaagtcccagtgatacttcagaaagtgcacataatg  
caatctcagaggcaaaacctcactcccttcctgctgaaaacattttctgagcatggcgacatccacatggagcaaataaac  
aataccgatgatgacaaggatggtactgaagcttttgaaattgctgatgtaatcagacgtgtagacgataatggtaagca  
aattgatagttat

>Balsas\_Wilkes Site 6\_AY106190

-----  
tgaagtttcacctgaggaagctgcctgggcagattcatgcttcgtgcagacttctgaactgtcatacgatgactggggga  
gcgatgaggagtatgctgcttgatgccctcgaaaagccaacagaaagtcccagtgatacttcagaaagtgcacataatgc  
aatctcagaggcaaaacctcactcccttcctgctgaaaacattttctgagcatggcgacatccacatggagcaaataaaca  
ataccgatgatgacaaggatggtactgaagcttttgaaattgctgatgtaatcagacgtgtagacgataatggtaagcaa  
attgatagttat

>Balsas\_INIFAP JSP y Lo5130\_AY106190

ttatgaaagccattgaatcaaataagaatgtagttgaagttcacctgaggaagctgcctgggcagattcatgcttcgtg  
cagacttctgaactgtcatatgatgactgggg-  
agcgatgaggagtatgctgcttgatgccctcgaaaagccaacagaaagtcccagtgatacttcagaaagtgcacataatg  
caatctcagaggcaaaacctcactcccttcctgctgaaaacattttctgagcatggcgacatccacatggagcaaataaac

aataccgatgatgacaaggatggtactgaagcttttgaaattgctgatgtaatcagacgtgtagacgataatggtaagca  
aattgatagttat

>Balsas\_INIFAP JSG y LOS 119\_AY106190

ttatgaaagccattgaaatcaaataagaatgtagttgaagtttcacctgaggaagctgacctgggagattcatgcttcgtg  
cagacttctgaactgtcatacgatgactgggg-

agcgatgaggagtatgctgcttgatgccctcgaaaagccaacagaaagtcccagtgatacttcagaaagtgcacataatg  
caatctcagaggcaaaacctcactcccttcctgctgaaaacatttctgagcatggcgacatccacatggagcaataaac  
aataccgatgatgacaaggatggtactgaagcttttgaaattgctgatgtaatcagacgtgtagacgataatggtaagca  
aattgatagttat

>Jalisco\_INIFAP JSG y MAS 401\_AY106190

ttatgaaagccattgaaatcaaataagaatgtagttgaagtttcacctgaggaagctgacctgggagattcatgcttcgtg  
cagacttctgaactgtcatatgatgactgggg-

gcgatgaggagtatgctgcttgatgccctcgaaaagccaacagaaagtcccagtgatacttcagaaagtgcacataatg  
aatctcagaggcaaaacctcactcccttcctgctgaaaacatttctgagcatggcgacatccacatggagcaataaaca  
ataccgatgatgacaaggatggtactgaagcttttgaaattgctgatgtaatcagacgtgtagacgataatggtaagca  
attgatagttat

>Balsas\_CIMMYT 8783\_AY106190

ttatgaaagccattgaaatcaaataagaatgtagttgaagtttcacctgaggaagctgacctgggagattcatgcttcgtg  
cagacttctgaactgtcatacgatgactgggg-

agcgatgaggagtatgctgcttgatgccctcgaaaagccaacagaaagtcccagtgatacttcagaaagtgcacataatg  
caatctcagaggcaaaacctcactcccttcctgctgaaaacatttctgagcatggcgacatccacatggagcaataaac  
aataccgatgatgacaaggatggtactgaagcttttgaaattgctgatgtaatcagacgtgtagacgataatggtaagca  
aattgatagttat

>Oaxaca\_INIFAP JSG 197\_AY106190

-----

tgaagtttcacctgaggaagctgacctgggagattcatgcttcgtgcagacttctgaactgtcatatgatgactggggg-  
gcgatgaggagtatgctgcttgatgccctcgaaaagccaacagaaagtcccagtgatacttcagaaagtgcacataatg

aatctcagaggcaaaacctcactcccttcctgctgaaaacatttctgagcatggcgacatccacatggagcaataaaca  
ataccgatgatgacaaggatggtactgaagcttttgaaattgctgatgtaatcagacgtgtagacgataatggtaagca  
attgatagttat

>Balsas\_INIFAP JSG y LOS 109\_AY106190

ttatgaaagccattgaaatcaaataagaatgtagttgaagtttcacctgaggaagctgacctgggagattcatgcttcgtg  
cagacttctgaactgtcatacgatgactgggg-

agcgatgaggagtatgctgcttgatgccctcgaaaagccaacagaaagtcccagtgatacttcagaaagtgcacataatg  
caatctcagaggcaaaacctcactcccttcctgctgaaaacatttctgagcatggcgacatccacatggagcaataaac  
aataccgatgatgacaaggatggtactgaagcttttgaaattgctgatgtaatcagacgtgtagacgataatggtaagca  
aattgatagttat

>Balsas\_INIFAP JSG 378\_AY106190

-----

caaataagaatgtagttgaagtttcacctgaggaagctgacctgggagattcatgcttcgtgcagacttctgaactgtca  
tacgatgactgggg-

agcgatgaggagtatgctgcttgatgccctcgaaaagccaacagaaagtcccagtgatacttcagaaagtgcacataatg  
caatctcagaggcaaaacctcactcccttcctgctgaaaacatttctgagcatggcgacatccacatggagcaataaac  
aataccgatgatgacaaggatggtactgaagcttttgaaattgctgatgtaatcagacgtgtagacgataatggtaagca  
aattgatagttat

>Balsas\_INIFAP JSG 374\_AY106190

ttatgaaagccattgaaatcaaataagaatgtagttgaagtttcacctgaggaagctgacctgggagattcatgcttcgtg  
cagacttctgaactgtcatatgatgactgggg-

agcgatgaggagtatgctgcttgatgccctcgaaaagccaacagaaagtcccagtgatacttcagaaagtgcacataatg  
caatctcagaggcaaaacctcactcccttcctgctgaaaacatttctgagcatggcgacatccacatggagcaataaac  
aataccgatgatgacaaggatggtactgaagcttttgaaattgctgatgtaatcagacgtgtagacgataatggtaagca  
aattgatagttat

>Balsas\_INIFAP JSG y LOS 161\_AY106190

ttatgaaagccattgaaatcaaataagaatgtagttgaagtttcacctgaggaagctgacctgggagattcatgcttcgtg  
cagacttctgaactgtcatatgatgactgggg-

agcgatgaggagtatgctgcttgatgccctcgaaaagccaacagaaagtcccagtgatacttcagaaagtgcacataatg  
caatctcagaggcaaaacctcactcccttcctgctgaaaacatttctgagcatggcgacatccacatggagcaataaac

aataccgatgatgacaaggatggtactgaagcttttgaaattgctgatgtaatcagacgtgtagacgataatggtaagca  
aattgatagttat

>Balsas\_CIMMYT 11355\_AY106190

ttatgaaagccattgaaatcaaataagaatgtagttgaagtttcacctgaggaagctgcctgggcagattcatgcttcgtg  
cagacttctgaactgtcatacgatgactgggg-

agcgatgaggagtatgctgcttgatgccctcgaaaagccaacagaaagtcacagtgatacttcagaaagtgacataatg  
caatctcagaggcaaaacctcactcccttcctgctgaaaacatttctgagcatggcgacatccacatggagcaataaac  
aataccgatgatgacaaggatggtactgaagcttttgaaattgctgatgtaatcagacgtgtagacgataatggtaagca  
aattgatagttat

>Balsas\_USDA PI566686\_AY106190

-----

tgaagtttcacctgaggaagctgcctgggcagattcatgcttcgtgcagacttctgaactgtcatacgatgactgggg-

agcgatgaggagtatgctgcttgatgccctcgaaaagccaacagaaagtcacagtgatacttcagaaagtgacataatg  
caatctcagaggcaaaacctcactcccttcctgctgaaaacatttctgagcatggcgacatccacatggagcaataaac  
aataccgatgatgacaaggatggtactgaagcttttgaaattgctgatgtaatcagacgtgtagacgataatggtaagca  
aattgatagttat

>Jalisco\_INIFAP JSG y MAS 264\_AY106190

ttatgaaagccattgaaatcaaataagaatgtagttgaagtttcacctgaggaagctgcctgggcagattcatgcttcgtg  
cagacttctgaactgtcatatgatgactgggg-

agcgatgaggagtatgctgcttgatgccctcgaaaagccaacagaaagtcacagtgatacttcagaaagtgacataatg  
caatctcagaggcaaaacctcactcccttcctgctgaaaacatttctgagcatggcgacatccacatggagcaataaac  
aataccgatgatgacaaggatggtactgaagcttttgaaattgctgatgtaatcagacgtgtagacgataatggtaagca  
aattgatagttat

>Tripsacum\_WW-2120\_AY106190

ttatgaaagccattgaaatcaaataagaatgtagttgaacttttcacctgaggaagctgcctgggcagattcatgcttcgtg  
cagacttctgaactgtcatacgatgactgggg-

agcgatgaggagtatgctgcttgatgccctcgaaaagccaacagaaagtcacagtgatacttcagaaagtgacataatg  
caatctcagaggcaaaacctcactcccttcctgctgaaaacatttctgagcatggcgacatccacatggagcatatagac  
aataccgatgacgacaaggatggtactgaagcttttgaaattgctgatgtaatcagaggtgcagacgaacatggtaagcc  
aatggatagttat

>B73\_AY108504

ttaaggagacatggcaacagatggccgcaaaagtgccgcattgaacatttcaagcatgctggcaggaaaaccaccatgg  
caagtcatcgacaattctgtacattacattgggagattagagatgtctccttggttaacacacaactgtagagtttcgggc  
cgtcctgagttgaactagctggataggattctttgtacaatagttt-

gtttctctccttgcccgttgtaaccttatatatcacatcaaaaccattctttggttaagtttcagggcacagttgtgttg  
tgcacacgaaatgtttaagaaatgtgcagtttagtcatacctgttgtca-

>Oh43\_AY108504

ttaaggagacatggcaacagatggccgcaaaagtgccgcattgaacatttcaagcatgctggcaggaaaaccaccatgg  
caagtcatcgacaattctgtacattacattgggagattagagatgtctccttggttaacacacaactgtagagtttcgggc  
cgtcctgagttgaactagctggataggattctttgtacaatagttt-

gtttctctccttgcccgttgtaaccttatatatcacatcaaaaccattctttggttaagtttcagggcacagttgtgttg  
tgcacacgaaatgtttaagaaatgtgcagtttagtcatacctgttgtc--

>IL14H\_AY108504

ttaaggagacatggcaacagatggccgcaaaagtgccgcattgaacatttcaagcatgctggcaggaaaaccaccatgg  
caagtcatcgacaattctgtacattacattgggagattagagatgtctccttggttaacacacaactgtagagtttcgggc  
cgtcctgagttgaactagctggataggattctttgtacaatagttt-

gtttctctccttgcccgttgtaaccttatatatcacatcaaaaccattctttggttaagtttcagggcacagttgtgttg  
tgcacacgaaatgtttaagaaatgtgcagtttagtcatacctgttgtca-

>Mo17\_AY108504

ttaaggagacatggcaacagatggccgcaaaagtgccgcattgaacatttcaagcatgctggcaggaaaaccaccatgg  
caagtcatcgacaattctgtacattacattgggagattagagatgtctccttggttaacacacaactgtagagtttcgggc  
cgtcctgagttgaactagctggataggattctttgtacaatagttt-

gtttctctccttgcccgttgtaaccttatatatcacatcaaaaccattctttggttaagtttcagggcacagttgtgttg  
tgcacacgaaatgtttaagaaatgtgcagtttagtcatacctgttgtca-

>Ky21\_AY108504

ttaaggagacatggcaacagatggccgcaaaagtgccgcattgaacatttcaagcatgctggcaggaaaaccacatgg  
caagtcacgacaattctgtacattacattgggagattagagatgtctccttggttaacacacaactgtagagtttcgggc  
cgtcctgagttgaactagctggataggattctttgtacaatagttt-  
gtttctctccttgcccgttgtaaccttatatatcacatcaaaaccattctttggttaagtttcagggcacagttgtgttg  
tgcacacgaaatgtttaagaaatgttcagtttagtcatacctgtttgtca-

>M37W\_AY108504

ttaaggagacatggcaacagatggccgcaaaagtgccgcattgaacatttcaagcatgctggcaggaaaaccacatgg  
caagtcacgacaattctgtacattacattgggagattagagatgtctccttggttaacacacaactgtagagtttcgggc  
cgtcctgagttgaactagctggataggattctttgtacaatagttt-  
gtttctctccttgcccgttgtaaccttatatatcacatcaaaaccattctttggttaagtttcagggcacagttgtgttg  
tgcacacgaaatgtttaagaaatgttcagtttagtcatacctgtttgtcaa

>HP301\_AY108504

ttaaggagacatggcaacagatggccgcaaaagtgccgcattgaacatttcaagcatgctggcaggaaaaccacatgg  
caagtcacgacaattctgtacattacattgggagattagagatgtctccttggttaacacacaactgtagagtttcgggc  
cgtcctgagttgaactagctggataggattctttgtacaatagttt-  
gtttctctccttgcccgttgtaaccttatatatcacatcaaaaccattctttggttaagtttcagggcacagttgtgttg  
tgcacacgaaatgtttaagaaatgttcagtttagtcatacctgtttgtc--

>CML247\_AY108504

ttaaggagacatggcaacagatggccgcaaaagtgccgcattgaacatttcaagcatgctggcaggaaaaccacatgg  
caagtcacgacaattctgtacattacattgggagattagagatgtctccttggttaacacacaactgtagagtttcgggc  
cgtcctgagttgaactagctggataggattctttgtacaatagttt-  
gtttctctccttgcccgttgtaaccttatatatcacatcaaaaccattctttggttaagtttcagggcacagttgtgttg  
tgcacacgaaatgtttaagaaatgttcagtttagtcatacctgtttgtc--

>NC350\_AY108504

ttaaggagacatggcaacagatggccgcaaaagtgccgcattgaacatttcaagcatgctggcaggaaaaccacatgg  
caagtcacgacaattctgtacattacattgggagattagagatgtctccttggttaacacacaactgtagagtttcgggc  
cgtcctgagttgaactagctggataggattctttgtacaatagttt-  
gtttctctccttgcccgttgtaaccttatatatcacatcaaaaccattctttggttaagtttcagggcacagttgtgttg  
tgcacacgaaatgtttaagaaatgttcagtttagtcatacctgtttg----

>Ki3\_AY108504

ttaaggagacatggcaacagatggccgcaaaagtgccgcattgaacatttcaagcatgctggcaggaaaaccacatgg  
caagtcacgacaattctgtacattacattgggagattagagatgtctccttggttaacacacaactgtagagtttcgggc  
cgtcctgagttgaactagctggataggattctttgtacaatagttt-  
gtttctctccttgcccgttgtaaccttatatatcacatcaaaaccattctttggttaagtttcagggcacagttgtgttg  
tgcacacgaaatgtttaagaaatgttcagtttagtcatacctgtttgt---

>Kill\_AY108504

----

ggagacatggcaacagatggccgcaaaagtgccgcattgaacatttcaagcatgctggcaggaaaaccacatggcaag  
tcatcgacaattctgtacattacattgggagattagagatgtctccttggttaacacacaactgtagagtttcgggcccgc  
ctgagttgaactagctggataggattctttgtacaatagttt-  
gtttctctccttgcccgttgtaaccttatatatcacatcaaaaccattctttggttaagtttcagggcacagttgtgttg  
tgcacacgaaatgtttaagaaatgttcagtttagtcatacctgtttgtc--

>CML333\_AY108504

----

ggagacatggcaacagatggccgcaaaagtgccgcattgaacatttcaagcatgctggcaggaaaaccacatggcaag  
tcatcgacaattctgtacattacattgggagattagagatgtctccttggttaacacacaactgtagagtttcgggcccgc  
ctgagttgaactagctggataggattctttgtacaatagttt-  
gtttctctccttgcccgttgtaaccttatatatcacatcaaaaccattctttggttaagtttcagggcacagttgtgttg  
tgcacacgaaatgtttaagaaatgttcagtttagtcatacctgtttgtcaa

>CML322\_AY108504

-----

tggcaacagatggccgcaaaagtgccgcattgaacatttcaagcatgctggcaggaaaaccacatggcaagtcacg  
caattctgtacattacattgggagattagagatgtctccttggttaacacacaactgtagagtttcgggcccgc  
gaactagctggataggattctttgtacaatagttt-  
gtttctctccttgcccgttgtaaccttatatatcacatcaaaaccattctttggttaagtttcagggcacagttgtgttg  
tgcacacgaaatgtttaagaaatgttcagtttagtcatacctgtttgtc---

>CML69\_AY108504

----

ggagacatggcaacagatggccgcaaaagtgccgcattgaacatttcaagcatgctggcaggaaaaccacatggcaag  
tcatcgacaattctgtacattacattgggagattagagatgtctccttggttaacacacaactgtagagtttcgggcccgc  
ctgagttgaactagctggataggattctttgtacaatagttt-

gtttctctccttgcccgttgtaaccttatatatcacatcaaaaccattctttggttaagtttcagggcacagttgtgttg  
tgcacacgaaatgtttaagaaatttgagtttagtcatacctgttgtcaa

>Assinboine\_PI213793\_AY108504

ttaaggagacatggcaacagatggccgcaaaagtgccgcattgaacatttcaagcatgctggcaggaaaaccacatgg  
caagtcatcgacaattctgtacattacattgggagattagagatgtctccttggttaacacacaactgtagagtttcgggc  
cgtcccagattgaactagctggataggattctttgtacaatagttt-

gtttctctccttgcccgttgtaaccttatatatcacatcaaaaccattctttggttaagtttcagggcacagttgtgttg  
tgcacacgaaatgtttaagaaatttgagtttagtcatacctgttgtcaa

>Guirua\_MAG 450\_AY108504

ttaaggagacatggcaacagatggccgcaaaagtgccgcattgaacatttcaagcatgctggcaggaaaaccacatgg  
caagtcatcgacaattctgtacattacattgggagattagagatgtctccttggttaacacacaactgtagagtttcgggc  
cgtcctgagttgaactagctggataggattctttgtacaatagttt-

gtttctctccttgcccgttgtaaccttatatatcacatcaaaaccattctttggttaagtttcagggcacagttgtgttg  
tgcacacgaaatgtttaagaaatttgagtttagtcatacctgttgtcaa

>Nal-tel\_YUC 7\_AY108504

ttaaggagacatggcaacagatggccgcaaaagtgccgcattgaacatttcaagcatgctggcaggaaaaccacatgg  
caagtcatcgacaattctgtacattacattgggagattagagatgtctccttggttaacacacaactgtagagtttcgggc  
cgtcctgagttgaactagctggataggattctttgtacaatagttt-

gtttctctccttgcccgttgtaaccttatatatcacatcaaaaccattctttggttaagtttcagggcacagttgtgttg  
tgcacacgaaatgtttaagaaatttgagtttagtcatacctgttgtcaa

>Pisscotunto\_APC 13\_AY108504

ttaaggagacatggcaacagatggccgcaaaagtgccgcattgaacatttcaagcatgctggcaggaaaaccacatgg  
caagtcatcgacaattctgtacattacattgggagattagagatgtctccttggttaacacacaactgtagagtttcgggc  
cgtcctgagttgaactagctggataggattctttgtacaatagttt-

gtttctctccttgcccgttgtaaccttatatatcacatcaaaaccattctttggttaagtttcagggcacagttgtgttg  
tgcacacgaaatgtttaagaaatttgagtttagtcatacctgttgtcaa

>Sabanero\_SAN 329\_AY108504

ttaaggagacatggcaacagatggccgcaaaagtgccgcattgaacatttcaagcatgctggcaggaaaaccacatgg  
caagtcatcgacaattctgtacattacattgggagattagagatgtctccttggttaacacacaactgtagagtttcgggc  
cgtcctgagttgaactagctggataggattctttgtacaatagttt-

gtttctctccttgcccgttgtaaccttatatatcacatcaaaaccattctttggttaagtttcagggcacagttgtgttg  
tgcacacgaaatgtttaagaaatttgagtttagtcatacctgttgtcaa

>Serrano\_GUA 14\_AY108504

ttaaggagacatggcaacagatggccgcaaaagtgccgcattgaacatttcaagcatgctggcaggaaaaccacatgg  
caagtcatcgacaattctgtacattacattgggagattagagatgtctccttggttaacacacaactgtagagtttcgggc  
cgtcctgagttgaactagctggataggattctttgtacaatagttt-

gtttctctccttgcccgttgtaaccttatatatcacatcaaaaccattctttggttaagtttcagggcacagttgtgttg  
tgcacacgaaatgtttaagaaatttgagtttagtcatacctgttgtcaa

>Zapalote Chico\_OAX 70\_AY108504

ttaaggagacatggcaacagatggccgcaaaagtgccgcattgaacatttcaagcatgctggcaggaaaaccacatgg  
caagtcatcgacaattctgtacattacattgggagattagagatgtctccttggttaacacacaactgtagagtttcgggc  
cgtcctgagttgaactagctggataggattctttgtacaatagttt-

gtttctctccttgcccgttgtaaccttatatatcacatcaaaaccattctttggttaagtttcagggcacagttgtgttg  
tgcacacgaaatgtttaagaaatttgagtttagtcatacctgttgtcaa

>Bolita\_OAX 68\_AY108504

ttaaggagacatggcaacagatggccgcaaaagtgccgcattgaacatttcaagcatgctggcaggaaaaccacatgg  
caagtcatcgacaattctgtacattacattgggagattagagatgtctccttggttaacacacaactgtagagtttcgggc  
cgtcctgagttgaactagctggataggattctttgtacaatagttt-

gtttctctccttgcccgttgtaaccttatatatcacatcaaaaccattctttggttaagtttcagggcacagttgtgttg  
tgcacacgaaatgtttaagaaatttgagtttagtcatacctgttgtcaa

>Cateto Sulino\_URG 11\_AY108504

ttaaggagacatggcaacagatggccgcaaaagtgccgcattgaacatttcaagcatgctggcaggaaaaccacatgg

caagtcacgacaattctgtacattacattgggagattagagatgtctccttggttaacacacaactgtagagtttcggggc  
cgtcctgagttgaactagctggataggattctttgtacaatagttt-  
gtttctctccttgcccgttgaaccttatatatcacatcaaaaccattctttggttaagtttcagggcacagttgtgttg  
tgcacacgaaatgtttaagaaatttgcagtttagtcatacctgttgtcaa

>Chalqueno\_MEX 48\_AY108504

ttaaggagacatggcaacagatggccgcaaaagtgccgcattgaacatttcaagcatgctggcaggaaaaccaccatgg  
caagtcacgacaattctgtacattacattgggagattagagatgtctccttggttaacacacaactgtagagtttcggggc  
cgtcctgagttgaactagctggataggattctttgtacaatagttt-  
gtttctctccttgcccgttgaaccttatatatcacatcaaaaccattctttggttaagtttcagggcacagttgtgttg  
tgcacacgaaatgtttaagaaatttgcagtttagtcatacctgttgtcaa

>Chapalote\_SIN 2\_AY108504

ttaaggagacatggcaacagatggccgcaaaagtgccgcattgaacatttcaagcatgctggcaggaaaaccaccatgg  
caagtcacgacaattctgtacattacattgggagattagagatgtctccttggttaacacacaactgtagagtttcggggc  
cgtcctgagttgaactagctggataggattctttgtacaatagttt-  
gtttctctccttgcccgttgaaccttatatatcacatcaaaaccattctttggttaagtttcagggcacagttgtgttg  
tgcacacgaaatgtttaagaaatttgcagtttagtcatacctgttgtcaa

>Conico\_PUE 32\_AY108504

ttaaggagacatggcaacagatggccgcaaaagtgccgcattgaacatttcaagcatgctggcaggaaaaccaccatgg  
caagtcacgacaattctgtacattacattgggagattagagatgtctccttggttaacacacaactgtagagtttcggggc  
cgtcctgagttgaactagctggataggattctttgtacaatagttt-  
gtttctctccttgcccgttgaaccttatatatcacatcaaaaccattctttggttaagtttcagggcacagttgtgttg  
tgcacacgaaatgtttaagaaatttgcagtttagtcatacctgttgtcaa

>Costeno\_VEN 453\_AY108504

ttaaggagacatggcaacagatggccgcaaaagtgccgcattgaacatttcaagcatgctggcaggaaaaccaccatgg  
caagtcacgacaattctgtacattacattgggagattagagatgtctccttggttaacacacaactgtagagtttcggggc  
cgtcctgagttgaactagctggataggattctttgtacaatagttt-  
gtttctctccttgcccgttgaaccttatatatcacatcaaaaccattctttggttaagtttcagggcacagttgtgttg  
tgcacacgaaatgtttaagaaatttgcagtttagtcatacctgttgtcaa

>Crystalino Norteno\_CHI 349\_AY108504

ttaaggagacatggcaacagatggccgcaaaagtgccgcattgaacatttcaagcatgctggcaggaaaaccaccatgg  
caagtcacgacaattctgtacattacattgggagattagagatgtctccttggttaacacacaactgtagagtttcggggc  
cgtcctgagttgaactagctggataggattctttgtacaatagttt-  
gtttctctccttgcccgttgaaccttatatatcacatcaaaaccattctttggttaagtttcagggcacagttgtgttg  
tgcacacgaaatgtttaagaaatttgcagtttagtcatacctgttgtcaa

>Dzit Bacal\_GUA 131\_AY108504

ttaaggagacatggcaacagatggccgcaaaagtgccgcattgaacatttcaagcatgctggcaggaaaaccaccatgg  
caagtcacgacaattctgtacattacattgggagattagagatgtctccttggttaacacacaactgtagagtttcggggc  
cgtcctgagttgaactagctggataggattctttgtacaatagttt-  
gtttctctccttgcccgttgaaccttatatatcacatcaaaaccattctttggttaagtttcagggcacagttgtgttg  
tgcacacgaaatgtttaagaaatttgcagtttagtcatacctgttgtcaa

>Jalisco\_Benz 967\_AY108504

ttaaggagacatggcaacagatggccgcaaaagtgccgcattgaacatttcaagcatgctggcaggaaaaccaccatgg  
caagtcacgacaattctgtacattacattgggagattagagatgtctccttggttaacacacaactgtagagtttcggggc  
cgtcctgagttgaactagctggataggattctttgtacaatagttt-  
gtttctctccttgcccgttgaaccttatatatcacatcaaaaccattctttggttaagtttcagggcacagttgtgttg  
tgcacacgaaatgtttaagaaatttgcagtttagtcatacctgttgtcaa

>Balsas\_Beadle & Kato Site 4\_AY108504

ttaaggagacatggcaacagatggccgcaaaagtgccgcattgaacatttcaagcatgctggcaggaaaaccaccatgg  
caagtcacgacaattctgtacattacattgggagattagagatgtctccttggttaacacacaactgtagagtttcggggc  
cgtcctgagttgaactagctggataggattctttgtacaatagttt-  
gtttctctccttgcccgttgaaccttatatatcacatcaaaaccattctttggttaagtttcagggcacagttgtgttg  
tgcacacgaaatgtttaagaaatttgcagtttagtcatacctgttgtcaa

>Balsas\_Wilkes Site 6\_AY108504

ttaaggagacatggcaacagatggccgcaaaagtgccgcattgaacatttcaagcatgctggcaggaaaaccaccatgg  
caagtcacgacaattctgtacattacattgggagattagagatgtctccttggttaacacacaactgtagagtttcggggc  
cgtcctgagttgaactagctggataggattctttgtacaatagttt-  
gtttctctccttgcccgttgaaccttatatatcacatcaaaaccattctttggttaagtttcagggcacagttgtgttg

tgcacacgaaatgtttaagaaatgttcagtttagtcatacctgttggtcaa  
>Balsas\_INIFAP JSP y Lo5130\_AY108504  
ttaaggagacatggcaacagatggccgcaaaagtgccgcattgaacatttcaagcatgctggcaggaaaaccaccatgg  
caagtcacgcacaattctgtacattacattgggagattagagatgtctccttggttaacacacaactgtagagtttcgggc  
cgtcctgagttgaactagctggataggattctttgtacaatagttt-  
gtttctctccttgcccgttgtaaccttatatatcacatcaaaaccattctttggttaagtttcagggcacagttgtggtg  
tgcacacgaaatgtttaagaaatgttcagtttagtcatacctgttggtcaa  
>Balsas\_INIFAP JSG y LOS 119\_AY108504  
ttaaggagacatggcaacagatggccgcaaaagtgccgcattgaacatttcaagcatgctggcaggaaaaccaccatgg  
caagtcacgcacaattctgtacattacattgggagattagagatgtctccttggttaacacacaactgtagagtttcgggc  
cgtcctgagttgaactagctggataggattctttgtacaatagttt-  
gtttctctccttgcccgttgtaaccttatatatcacatcaaaaccattctttggttaagtttcagggcacagttgtggtg  
tgcacacgaaatgtttaagaaatgttcagtttagtcatacctgttggtcaa  
>Jalisco\_INIFAP JSG y MAS 401\_AY108504  
ttaaggagacatggcaacagatggccgcaaaagtgccgcattgaacatttcaagcatgctggcaggaaaaccaccatgg  
caagtcacgcacaattctgtacattacattgggagattagagatgtctccttggttaacacacaactgtagagtttcgggc  
cgtcctgagttgaactagctggataggattctttgtacaatagttt-  
gtttctctccttgcccgttgtaaccttatatatcacatcaaaaccattctttggttaagtttcagggcacagttgtggtg  
tgcacacgaaatgtttaagaaatgttcagtttagtcatacctgttggtcaa  
>Balsas\_CIMMYT 8783\_AY108504  
ttaaggagacatggcaacagatggccgcaaaagtgccgcattgaacatttcaagcatgctggcaggaaaaccaccatgg  
caagtcacgcacaattctgtacattacattgggagattagagatgtctccttggttaacacacaactgtagagtttcgggc  
cgtcctgagttgaactagctggataggattctttgtacaatagttt-  
gtttctctccttgcccgttgtaaccttatatatcacatcaaaaccattctttggttaagtttcagggcacagttgtggtg  
tgcacacgaaatgtttaagaaatgttcagtttagtcatacctgttggtcaa  
>Oaxaca\_INIFAP JSG 197\_AY108504  
ttaaggagacatggcaacagatggccgcaaaagtgccgcattgaacatttcaagcatgctggcaggaaaaccaccatgg  
caagtcacgcacaattctgtacattacattgggagattagagatgtctccttggttaacacacaactgtagagtttcgggc  
cattcctgagttgaactagctggataggattctttgtacaatagttt-  
gtttctctccttgcccgttgtaaccttatatatcacatcaaaaccattctttggttaagtttcagggcacagttgtggtg  
tgcacacgaaatgtttaagaaatgttcagtttagtcatacctgttggtcaa  
>Balsas\_INIFAP JSG y LOS 109\_AY108504  
ttaaggagacatggcaacagatggccgcaaaagtgccgcattgaacatttcaagcatgctggcagaaaaaccaccatgg  
caagtcacgcacaattctgtacattacattgggagattagagatgtctccttggttaacacacaactgtagagtttcgggc  
cgtcctgagttgaactagctggataggattctttgtacaatagttt-  
gtttctctccttgcccgttgtaaccttatatatcacatcaaaaccattctttggttaagtttcagggcacagttgtggtg  
tgcacacgaaatgtttaagaaatgttcagtttagtcatacctgttggtcaa  
>Balsas\_INIFAP JSG 378\_AY108504  
ttaaggagacatggcaacagatggccgcaaaagtgccgcattgaacatttcaagcatgctggcaggaaaaccaccatgg  
caagtcacgcacaattctgtacattacattgggagattagagatgtctccttggttaacacacaactgtagagtttcgggc  
cgtcctgagttgaactagctggataggattctttgtacaatagttt-  
gtttctctccttgcccgttgtaaccttatatatcacatcaaaaccattctttggttaagtttcagggcacagttgtggtg  
tgcacacgaaatgtttaagaaatgttcagtttagtcatacctgttggtcaa  
>Balsas\_INIFAP JSG 374\_AY108504  
ttaaggagacatggcaacagatggccgcaaaagtgccgcattgaacatttcaagcatgctggcaggaaaaccaccatgg  
caagtcacgcacaattctgtacattacattgggagattagagatgtctccttggttaacacacaactgtagagtttcgggc  
cgtcctgagttgaactagctggataggattctttgtacaatagttt-  
gtttctctccttgcccgttgtaaccttatatatcacatcaaaaccattctttggttaagtttcagggcacagttgtggtg  
tgcacacgaaatgtttaagaaatgttcagtttagtcatacctgttggtcaa  
>Balsas\_INIFAP JSG y LOS 161\_AY108504  
ttaaggagacatggcaacagatggccgcaaaagtgccgcattgaacatttcaagcatgctggcaggaaaaccaccatgg  
caagtcacgcacaattctgtacattacattgggagattagagatgtctccttggttaacacacaactgtagagtttcgggc  
cgtcctgagttgaactagctggataggattctttgtacaatagttt-  
gtttctctccttgcccgttgtaaccttatatatcacatcaaaaccattctttggttaagtttcagggcacagttgtggtg  
tgcacacgaaatgtttaagaaatgttcagtttagtcatacctgttggtcaa  
>Balsas\_CIMMYT 11355\_AY108504  
ttaaggagacatggcaacagatggccgcaaaagtgccgcattgaacatttcaagcatgctggcaggaaaaccaccatgg

caagtcacgcacaattctgtacattacattgggagattagagatgtctccttggttaacacacaactgtagagtttcggggc  
cgtcctgagttgaactagctggataggattctttgtacaatagttt-  
gtttctctccttgcccgttgtaaccttatatatcacatcaaaaccattctttggttaagtttcagggcacagttgtgttg  
tgcacacgaaatgtttaagaaatgtgcagtttagtcatacctgttgtcaa  
>Balsas\_USDA PI566686\_AY108504  
ttaaggagacatggcaacagatggccgcaaaagtgccgcattgaacatttcaagcatgctggcaggaaaaccacatgg  
caagtcacgcacaattctgtacattacattgggagattagagatgtctccttggttaacacacaactgtagagtttcggggc  
cgtcctgagttgaactagctggataggattctttgtacaatagttt-  
gtttctctccttgcccgttgtaaccttatatatcacatcaaaaccattctttggttaagtttcagggcacagttgtgttg  
tgcacacgaaatgtttaagaaatgtgcagtttagtcatacctgttgtcaa  
>Jalisco\_INIFAP JSG y MAS 264\_AY108504  
ttaaggagacatggcaacagatggccgcaaaagtgccgcattgaacatttcaagcatgctggcaggaaaaccacatgg  
caagtcacgcacaattctgtacattacattgggagattagagatgtctccttggttaacacacaactgtagagtttcggggc  
cgtcctgagttgaactagctggataggattctttgtacaatagtttagtttctccttgcccgttgtaaccttatatat  
cacatcaaaaccattctttggttaagtttcagggcacagttgtgtgtgacacgaaatgtttaagaaatgtgcagtt  
gtcatacctgttgtcaa  
>Tripsacum\_WW-2120\_AY108504  
ttacagagacatggcaacagatggccgcaaaagtgccgcattgaacatttcaagcatgctggcaggaaaaccacatgg  
taagtcacgaaacttctgtacattacattggaagattagagatgtctccttggttaacacacaactgtagagtttcggtg  
catcctgagttgaactagctggataggattctttgtacaatagttt-  
gtttctctccttgcccgttgtaaccttatatatcacatcaaaaccattctttgataagtttcagggcatagttgtgttg  
tgcacacgaaatgcttaagaaatgtgcagtttagtcatacctgttgtcaa

>B73\_AY108957  
athtagtcaa-gggcaggttttgtgaaatacgcccaa-ttgccagtatggcgtcttcacatta----  
tgtcgaagaaggaaatcgattgagttatgtgtggtgaaagaaagtgggtagacaaatattact----  
gactggtgaaagctaccaataggccatccgcacattaatgaccatgtttaggagttgttgctatgtactaacagaactgc  
atgttttgttgt---gtggctccattctgacttgt---  
gaaatgaactctcggtaagtcatagggcatttcatgtttgtacagggcatgtaggttagctttctggatgtagctaaat  
tca-aa-----

>Oh43\_AY108957  
athtagtcaa-gggcaggttttgtgaaatacgcccaa-ttgccagtatggcgtcttcacatta----  
tgtcgaagaaggaaatcgattgagttatgtgtggtgaaagaaagtgggtagacaaatattact----  
gactggtgaaagctaccaataggccatccgcacattaatgaccatgtttaggagttgttgctatgtactaacagaactgc  
atgttttgttgt---gtggctccattctgacttgt---  
gaaatgaactctcggtaagtcatagggcatttcatgtttgtacagggcatgtaggttagctttctggatgtagctaaat  
tca-a-----

>IL14H\_AY108957  
--ttagtcaa-gggcaggttttgtgaaatacgcccaa-ttgccagtatggcgtcttcacatta----  
tgtcgaagaaggaaatcgattgagttatgtgtggtgaaagaaagtgggtagacaaatattact----  
gactggtgaaagctaccaataggccatccgcacattaatgaccatgtttaggagttgttgctatgtactaacagaactgc  
atgttttgttgt---gtggctccattctgacttgt---  
gaaatgaactctcggtaagtcatagggcatttcatgtttgtacagggcatgtaggttagctttctggatgtagctaaat  
tca-aagcatcat-

>Mo17\_AY108957  
athtagtcaa-gggcaggttttgtgaaatacgcccaa-ttgccagtatggcgtcttcacatta----  
tgtcgaagaaggaaatcgattgagttatgtgtggtgaaagaaagtgggtagacaaatattact----  
gactggtgaaagctaccaataggccatccgcacattaatgaccatgtttaggagttgttgctatgtactaacagaactgc  
atgttttgttgt---gtggctccattctgacttgt---  
gaaatgaactctcggtaagtcatagggcatttcatgtttgtacagggcatgtaggttagctttctggatgtagctaaat  
tca-aagcat----

>Ky21\_AY108957  
athtagtcaa-gggcaggttttgtgaaatacgcccaa-ttgccagtatggcgtcttcacatta----  
tgtcgaagaaggaaatcgattgagttatgtgtggtgaaagaaagtgggtagacaaatattact----  
gactggtgaaagctaccaataggccatccgcacattaatgaccatgtttaggagttgttgctatgtactaacagaactgc



atgttttgttgt---gtggctccattctgacttgt---  
gaaatgaactctcggtaagtcataagggcatttcatgtttgtacagggcatgtaggtttagctttctgggatgtagctaaat  
tca-aagcatcatc  
>M37W\_AY108957  
athtagtcaa-gggcaggttttgtgaaatacgcccaa-ttgccagtatggcgtcttcacatta----  
tgtcgaagaaggaaatcgattgagttatgtgtggtgaaagaaagtgggtagacaaatattact----  
gactggtgaaagctaccaataggccatccgcacattaatgaccatgtttaggagttggtgctatgtactaacagaactgc  
atgttttgttgt---gtggctccattctgacttgt---  
gaaatgaactctcggtaagtcataagggcatttcatgtttgtacagggcatgtaggtttagctttctgggatgtagctaaat  
tca-aagcatca--  
>HP301\_AY108957  
athtagtcaaagggcaggttttgtgaaatacgcccaa-ttgccagtatggcgtcttcacatta----  
tgtcgaagaaggaaatcgattgagttatgtgtggtgaaagaaagtgggtagacaaatattact----  
gactggtgaaagctaccaataggccatccgcacattaatgaccatgtttaggagttggtgctatgtactaacagaactgc  
atgttttgttgt---gtggctccattctgacttgt---  
gaaatgaactctcggtaagtcataagggcatttcatgtttgtacagggcatgtaggtttagctttctgggatgtagctaaat  
t-----  
>CML247\_AY108957  
-tttagtcaa-gggcaggttttgtgaaatacgcccaa-ttgccagtatggcgtcttcacatta----  
tgtcgaagaaggaaatcgattgagttatgtgtggtgaaagaaagtgggtagacaaatattact----  
gactggtgaaagctaccaataggccatccgcacattaatgaccatgtttaggagttggtgctatgtactaacagaactgc  
atgttttgttgt---gtggctccattctgacttgt---  
gaaatgaactctcggtaagtcataagggcatttcatgtttgtacagggcatgtaggtttagctttctgggatgtagctaaat  
tca-aagcatcatc  
>NC350\_AY108957  
athtagtcaa-gggcaggttttgtgaaatacgcccaa-ttgccagtatggcgtcttcacatta----  
tgtcgaagaaggaaatcgattgagttatgtgtggtgaaagaaagtgggtagacaaatattact----  
gactggtgaaagctaccaataggccatccgcacattaatgaccatgtttaggagttggtgctatgtactaacagaactgc  
atgttttgttgt---gtggctccattctgacttgt---  
gaaatgaactctcggtaagtcataagggcatttcatgtttgtacagggcatgtaggtttagctttctgggatgtagctaaat  
tca-aagcatcatc  
>Ki3\_AY108957  
athtagtcaa-gggcaggttttgtgaaatacgcccaa-ttgccagtatggcgtcttcacatta----  
tgtcgaagaaggaaatcgattgagttatgtgtggtgaaagaaagtgggtagacaaatattact----  
gactggtgaaagctaccaataggccatccgcacattaatgaccatgtttaggagttggtgctatgtactaacagaactgc  
atgttttgttgt---gtggctccattctgacttgt---  
gaaatgaactctcggtaagtcataagggcatttcatgtttgtacagggcatgtaggtttagctttctgggatgtagctaaat  
tca-aagcatcatc  
>Kill\_AY108957  
athtagtcaa-gggcaggttttgtgaaatacgcccaa-ttgccagtatggcgtcttcacatta----  
tgtcgaagaaggaaatcgattgagttatgtgtggtgaaagaaagtgggtagacaaatattact----  
gactggtgaaagctaccaataggccatccgcacattaatgaccatgtttaggagttggtgctatgtactaacagaactgc  
atgttttgttgt---gtggctccattctgacttgt---  
gaaatgaactctcggtaagtcataagggcatttcatgtttgtacagggcatgtaggtttagctttctgggatgtagctaaat  
tca-a-----  
>CML333\_AY108957  
athtagtcaa-gggcaggttttgtgaaatacgcccaa-ttgccagtatggcgtcttcacatta----  
tgtcgaagaaggaaatcgattgagttatgtgtggtgaaagaaagtgggtagacaaatattact----  
gactggtgaaagctaccaataggccatccgcacattaatgaccatgtttaggagttggtgctatgtactaacagaactgc  
atgttttgttgt---gtggctccattctgacttgt---  
gaaatgaactctcggtaagtcataagggcatttcatgtttgtacagggcatgtaggtttagctttctgggatgtagctaaat  
tca-aagcatcatc  
>CML322\_AY108957  
athtagtcaa-gggcaggttttgtgaaatacgcccaa-ttgccagtatggcgtcttcacatta----  
tgtcgaagaaggaaatcgattgagttatgtgtggtgaaagaaagtgggtagacaaatattact----  
gactggtgaaagctaccaataggccatccgcacattaatgaccatgtttaggagttggtgctatgtactaacagaactgc  
atgttttgttgt---gtggctccattctgacttgt---

gaaatgaactctcggtaagtcataagggcatttcatgtttgtacagggcatgtagggttagctttctgggatgtagctaaat  
tca-aagcat----  
>CML69\_AY108957  
--ttagtcaa-gggcagggttttgtgaaatacgcctcaa-ttgccagatggcgtcttcacatta----  
tgctgaagaaggaaatcgattgagttatgtgtggtgaaagaaagtgggtagacaaatattact----  
gactggtgaaagctaccaataggccatccgcacattaatgacctggttaggagttggtgctatgtactaacagaactgc  
atgttttgttgt---gtggctccattctgacttgt---  
gaaatgaactctcggtaagtcataagggcatttcatgtttgtacagggcatgtagggttagctttctgggatgtagctaaat  
tca-aagcatcatc  
>Assinboine\_PI213793\_AY108957  
athtagtcaaagggcagggttttgtgaaatacgcctcaa-ttgccagatggcgtcttcacatta----  
tgctgaagaaggaaatcgattgagttatgtgtggtgaaagaaagtgggtagacaaatattact----  
gactggtgaaagctaccaataggccatccgcacattaatgacctggttaggagttggtgctatgtactaacagaactgc  
atgttttgttgt---gtggctccattctgacttgt---  
gaaatgaactctcggtaagtcataagggcatttcatgtttgtacagggcatgtagggttagctttctgggatgtagctaaat  
tca-aagcatcatc  
>Gordo\_CHH 160\_AY108957  
athtagtcaa-gggcagggttttgtgaaatacgcctcaaatttgccagatggcgtcttcacatta----  
tgctgaagaaggaaatcgattgagttatgtgtggtgaaagaaagtgggtagacaaatattact----  
gactggtgaaagctaccaataggccatccgcacattaatgacctggttaggagttggtgctatgtactaacagaactgc  
atgttttgttgt---gtggctccattctgacttgt---  
gaaatgaactctcggtaagtcataagggcatttcatgtttgtacagggcatgtagggttagctttctgggatgtagctaaat  
tca-aagcatcatc  
>Guirua\_MAG 450\_AY108957  
athtagtcaa-gggcagggttttgtgaaatacgcctcaa-ttgccagatggcgtcttcacatta----  
tgctgaagaaggaaatcgattgagttatgtgtggtgaaagaaagtgggtagacaaatattact----  
gactggtgaaagctaccaataggccatccgcacattaatgacctggttaggagttggtgctatgtactaacagaactgc  
atgttttgttgt---gtggctccattctgacttgt---  
gaaatgaactctcggtaagtcataagggcatttcatgtttgtacagggcatgtagggttagctttctgggatgtagctaaat  
tca-aagcatcatc  
>Nal-tel\_YUC 7\_AY108957  
athtagtcaa-gggcagggttttgtgaaatacgcctcaa-ttgccagatggcgtcttcacatta----  
tgctgaagaaggaaatcgattgagttatgtgtggtgaaagaaagtgggtagacaaatattact----  
gactggtgaaagctaccaataggccatccgcacattaatgacctggttaggagttggtgctatgtactaacagaactgc  
atgttttgttgt---gtggctccattctgacttgt---  
gaaatgaactctcggtaagtcataagggcatttcatgtttgtacagggcatgtagggttagctttctgggatgtagctaaat  
tca-aagcatcatc  
>Pisscotunto\_APC 13\_AY108957  
athtagtcaa-gggcagggttttgtgaaatacgcctcaa-ttgccagatggcgtcttcacatta----  
tgctgaagaaggaaatcgattgagttatgtgtggtgaaagaaagtgggtagacaaatattact----  
gactggtgaaagctaccaataggccatccgcacattaatgacctggttaggagttggtgctatgtactaacagaactgc  
atgttttgttgt---gtggctccattctgacttgt---  
gaaatgaactctcggtaagtcataagggcatttcatgtttgtacagggcatgtagggttagctttctgggatgtagctaaat  
tca-aagcatcatc  
>Sabanero\_SAN 329\_AY108957  
athtagtcaa-gggcagggttttgtgaaatacgcctcaa-ttgccagatggcgtcttcacatta----  
tgctgaagaaggaaatcgattgagttatgtgtggtgaaagaaagtgggtagacaaatattact----  
gactggtgaaagctaccaataggccatccgcacattaatgacctggttaggagttggtgctatgtactaacagaactgc  
atgttttgttgt---gtggctccattctgacttgt---  
gaaatgaactctcggtaagtcataagggcatttcatgtttgtacagggcatgtagggttagctttctgggatgtagctaaat  
tca-aagcatcatc  
>Serrano\_GUA 14\_AY108957  
athtagtcaa-gggcagggttttgtgaaatacgcctcaa-ttgccagatggcgtcttcacatta----  
tgctgaagaaggaaatcgattgagttatgtgtggtgaaagaaagtgggtagacaaatattact----  
gactggtgaaagctaccaataggccatccgcacattaatgacctggttaggagttggtgctatgtactaacagaactgc  
atgttttgttgt---gtggctccattctgacttgt---  
gaaatgaactctcggtaagtcataagggcatttcatgtttgtacagggcatgtagggttagctttctgggatgtagctaaat

tca-aagcatcatc  
>Zapalote Chico\_OAX 70\_AY108957  
athtagtcaa-gggcagggtttgtgaaatacgcccaa-ttgccagatggcgtcttcacatta----  
tgctgaagaaggaaatcgattgagttatgtgtggtgaaagaaagtgggtagacaaatattact----  
gactggtgaaagctaccaataggccatccgcacattaatgaccatggttaggagttggtgctatgtactaacagaactgc  
atgttttgttgt---gtggctccattctgacttgt---  
gaaatgaactctcggtaagtcatagggcatttcatggttgtacaggcatgtaggttagctttctggatgttagctaaat  
tca-aagcatcatc  
>Bolita\_OAX 68\_AY108957  
athtagtcaa-gggcagggtttgtgaaatacgcccaa-ttgccagatggcgtcttcacatta----  
tgctgaagaaggaaatcgattgagttatgtgtggtgaaagaaagtgggtagacaaatattact----  
gactggtgaaagctaccaataggccatccgcacattaatgaccatggttaggagttggtgctatgtactaacagaactgc  
atgttttgttgt---gtggctccattctgacttgt---  
gaaatgaactctcggtaagtcatagggcatttcatggttgtacaggcatgtaggttagctttctggatgttagctaaat  
tca-aagcatcatc  
>Cateto Sulino\_URG 11\_AY108957  
athtagtcaa-gggcagggtttgtgaaatacgcccaa-ttgccagatggcgtcttcacatta----  
tgctgaagaaggaaatcgattgagttatgtgtggtgaaagaaagtgggtagacaaatattact----  
gactggtgaaagctaccaataggccatccgcacattaatgaccatggttaggagttggtgctatgtactaacagaactgc  
atgttttgttgt---gtggctccattctgacttgt---  
gaaatgaactctcggtaagtcatagggcatttcatggttgtacaggcatgtaggttagctttctggatgttagctaaat  
tca-aagcatcatc  
>Chalqueno\_MEX 48\_AY108957  
athtagtcaa-gggcagggtttgtgaaatacgcccaa-ttgccagatggcgtcttcacatta----  
tgctgaagaaggaaatcgattgagttatgtgtggtgaaagaaagtgggtagacaaatattact----  
gactggtgaaagctaccaataggccatccgcacattaatgaccatggttaggagttggtgctatgtactaacagaactgc  
atgttttgttgt---gtggctccattctgacttgt---  
gaaatgaactctcggtaagtcatagggcatttcatggttgtacaggcatgtaggttagctttctggatgttagctaaat  
tca-aagcatcatc  
>Chapalote\_SIN 2\_AY108957  
athtagtcaa-gggcagggtttgtgaaatacgcccaa-ttgccagatggcgtcttcacatta----  
tgctgaagaaggaaatcgattgagttatgtgtggtgaaagaaagtgggtagacaaatattact----  
gactggtgaaagctaccaataggccatccgcacattaatgaccatggttaggagttggtgctatgtactaacagaactgc  
atgttttgttgt---gtggctccattctgacttgt---  
gaaatgaactctcggtaagtcatagggcatttcatggttgtacaggcatgtaggttagctttctggatgttagctaaat  
tca-aagcatcatc  
>Conico\_PUE 32\_AY108957  
athtagtcaaagggcagggtttgtgaaatacgcccaa-ttgccagatggcgtcttcacatta----  
tgctgaagaaggaaatcgattgagttatgtgtggtgaaagaaagtgggtagacaaatattact----  
gactggtgaaagctaccaataggccatccgcacattaatgaccatggttaggagttggtgctatgtactaacagaactgc  
atgttttgttgt---gtggctccattctgacttgt---  
gaaatgaactctcggtaagtcatagggcatttcatggttgtacaggcatgtaggttagctttctggatgttagctaaat  
tca-aagcatcatc  
>Costeno\_VEN 453\_AY108957  
athtagtcaaagggcagggtttgtgaaatacgcccaa-ttgccagatggcgtcttcacatta----  
tgctgaagaaggaaatcgattgagttatgtgtggtgaaagaaagtgggtagacaaatattact----  
gactggtgaaagctaccaataggccatccgcacattaatgaccatggttaggagttggtgctatgtactaacagaactgc  
atgttttgttgt---gtggctccattctgacttgt---  
gaaatgaactctcggtaagtcatagggcatttcatggttgtacaggcatgtaggttagctttctggatgttagctaaat  
tca-aagcatcatc  
>Cristalino Norteno\_CHI 349\_AY108957  
athtagtcaa-gggcagggtttgtgaaatacgcccaa-ttgccagatggcgtcttcacatta----  
tgctgaagaaggaaatcgattgagttatgtgtggtgaaagaaagtgggtagacaaatattactaacactgactggtgaaagc  
taccaataggccatccgcacattaatgaccatggttaggagttggtgctatgtactaacagaactgcatgttttgttgt-  
--gtggctccattctgacttgt---  
gaaatgaactctcggtaagtcatagggcatttcatggttgtacaggcatgtaggttagctttctggatgttagctaaat  
tca-aagcatcatc

>Dzit Bacal\_GUA 131\_AY108957

athtagtcaa-gggcagggttttgtgaaatacgcccaa-ttgccagatggcgtcttcacatta----  
tgtcgaagaaggaaatcgattgagttatgtgtggtgaaagaaagtgggtagacaaatattact----  
gactggtgaaagctaccaataggccatccgcacattaatgaccatggttaggagttggtgctatgtactaacagaactgc  
atgttttgttgt---gtggctccattctgacttgt---  
gaaatgaactctcggtaagtcatagggcatttcatggttgtacaggcagtaggttagctttctggatgttagctaaat  
tca-aagcatcatc

>Jalisco\_Benz 967\_AY108957

athtagtcaaagggcagggttttgtgaaatacgcccaa-ttgccagatggcgtcttcacatta----  
tgtcgaagaaggaaatcgattgagttatgtgtggtgaaagaaagtgggtagacaaatattact----  
gactggtgaaagctaccaataggccatccgcacattaatgaccatggttaggagttggtgctatgtactaacagaactgc  
atgttttgttgt---gtggctccattctgacttgt---  
gaaatgaactctcggtaagtcatagggcatttcatggttgtacaggcagtaggttagctttctggatgttagctaaat  
tca-aagcatcatc

>Balsas\_Kato Site 4\_AY108957

athtagtcaa-gggcagggttttgtgaaatacgcccaa-ttgccagatggcgtcttcacatta----  
tgtcgaagaaggaaatcgattgagttatgtgtggtgaaagaaagtgggtagacaaatattact----  
gactggtgaaagctaccaataggccatccgcacattaatgaccatggttaggagttggtgctatgtactaacagaactgc  
atgttttgttgt---gtggctccattctgacttgt---  
gaaatgaactctcggtaagtcatagggcatttcatggttgtacaggcagtaggttagctttctggatgttagctaaat  
tca-aagcatcatc

>Balsas\_Wilkes Site 6\_AY108957

-----gggcagggttttgtgaaatacgcccaa-ttgccagatggcgtcttcacatta----  
tgtcgaagaaggaaatcgattgagttatgtgtggtgaaagaaagtgggtagacaaatattact----  
gactggtgaaagctaccaataggccatccgcacattaatgaccatggttaggagttggtgctatgtactaacagaactgc  
atgttttgttgt---gtggctccattctgacttgt---  
gaaatgaactctcggtaagtcatagggcatttcatggttgtacaggcagtaggttagctttctggatgttagctaaat  
tca-----

>Balsas\_INIFAP JSP y Lo5130\_AY108957

athtagtcaa-gggcagggttttgtgaaatacgcccaa-ttgccagatggcgtcttcacatta----  
tgtcgaagaaggaaatcgattgagttatgtgtggtgaaagaaagtgggtagacaaatattact----  
gactggtgaaagctaccaataggccatccgcacattaatgaccatggttaggagttggtgctatgtactaacagaactgc  
atgttttgttgt---gtggctccattctgacttgt---  
gaaatgaactctcggtaagtcatagggcatttcatggttgtacaggcagtaggttagctttctggatgttagctaaat  
tca-aagcatcatc

>Balsas\_INIFAP JSG y LOS 119\_AY108957

athtagtcaa-gggcagggttttgtgaaatacgcccaa-ttgccagatggcgtcttcacatta----  
tgtcgaagaaggaaatcgattgagttatgtgtggtgaaagaaagtgggtagacaaatattact----  
gactggtgaaagctaccaataggccatccgcacattaatgaccatggttaggagttggtgctatgtactaacagaactgc  
atgttttgttgt---gtggctccattctgacttgt---  
gaaatgaactctcggtaagtcatagggcatttcatggttgtacaggcagtaggttagctttctggatgttagctaaat  
tca-aagcatcatc

>Balsas\_CIMMYT 8783\_AY108957

athtagtcaa-gggcagggttttgtgaaatacgcccaa-ttgccagatggcgtcttcacatta----  
tgtcgaagaaggaaatcgattgagttatgtgtggtgaaagaaagtgggtagacaaatattact----  
gactggtgaaagctaccaataggccatccgcacattaatgaccatggttaggagttggtgctatgtactaacagaactgc  
atgttttgttgt---gtggctccattctgacttgt---  
gaaatgaactctcggtaagtcatagggcatttcatggttgtacaggcagtaggttagctttctggatgttagctaaat  
tca-aagcatcatc

>Oaxaca\_INIFAP JSG 197\_AY108957

athtagtcaaagggcagggttttgtgaaatacgcccaa-ttgccagatggcgtcttcacatta----  
tgtcgaagaaggaaatcgattgagttatgtgtggtgaaagaaagtgggtagacaaatattact----  
gactggtgaaagctaccaataggccatccgcacattaatgaccatggttaggagttggtgctatgtactaacagaactgc  
atgttttgttgt---gtggctccattctgacttgt---  
gaaatgaactctcggtaagtcatagggcatttcatggttgtacaggcagtaggttagctttctggatgttagctaaat  
tca-aagcatcatc

>Balsas\_INIFAP JSG y LOS 109\_AY108957

athtagtcaaagggcagggttttgtgaaatacgcccaa-ttgccagtatggcgtcttcacatta----  
tgtcgaagaaggaaatcgattgagttatgtgtggtgaaagaaagtgggtagacaaatattact----  
gactggtgaaagctaccaataggccatccgcacattaatgaccatgtttaggagttgttgctatgtactaacagaactgc  
atgttttgttgt---gtggctccattctgacttgt---  
gaaatgaactctcggtaagtcatagggcatttcatgtttgtacaggcagtaggttttagctttctggatgttagctaaat  
tca-aagcatcatc

>Balsas\_INIFAP JSG 378\_AY108957

athtagtcaa-gggcagggttttgtgaaatacgcccaa-ttgccagtatggcgtcttcacatta----  
tgtcgaagaaggaaatcgattgagttatgtgtggtgaaagaaagtgggtagacaaatattact----  
gactggtgaaagctaccaataggccatccgcacattaatgaccatgtttaggagttgttgctatgtactaacagaactgc  
atgttttgttgt---gtggctccattctgacttgt---  
gaaatgaactctcggtaagtcatagggcatttcatgtttgtacaggcagtaggttttagctttctggatgttagctaaat  
tca-aagcatcatc

>Balsas\_INIFAP JSG 374\_AY108957

athtagtcaa-gggcagggttttgtgaaatacgcccaa-ttgccagtatggcgtcttcacatta----  
tgtcgaagaaggaaatcgattgagttatgtgtggtgaaagaaagtgggtagacaaatattact----  
gactggtgaaagctaccaataggccatccgcacattaatgaccatatttaggagttgttgctatgtactaacagaactgc  
atgttttgttgt---gtggctccattctgacttgt---  
gaaatgaactctcggtaagtcatagggcatttcatgtttgtacaggcagtaggttttagctttctggatgttagctaaat  
tca-aagcatcatc

>Balsas\_INIFAP JSG y LOS 161\_AY108957

athtagtcaa-gggcagggttttgtgaaatacgcccaa-ttgccagtatggcgtcttcacatta----  
tgtcgaagaaggaaatcgattgagttatgtgtggtgaaagaaagtgggtagacaaatattact----  
gactggtgaaagctaccaataggccatccgcacattaatgaccatgtttaggagttgttgctatgtactaacagaactgc  
atgttttgttgt---gtggctccattctgacttgt---  
gaaatgaactctcggtaagtcatagggcatttcatgtttgtacaggcagtaggttttagctttctggatgttagctaaat  
tca-aagcatcatc

>Balsas\_CIMMYT 11355\_AY108957

athtagtcaa-gggcagggttttgtgaaatacgcccaa-ttgccagtatggcgtcttcacatta----  
tgtcgaagaaggaaatcgattgagttatgtgtggtgaaagaaagtgggtagacaaatattactaactgactggtgaaagc  
taccaataggccatccgcacattaatgaccatgtttaggagttgttgctatgtactaacagaactgcatgttttgttgt-  
--gtggctccattctgacttgt---  
gaaatgaactctcggtaagtcatagggcatttcatgtttgtacaggcagtaggttttagctttctggatgttagctaaat  
tca-aagcatcatc

>Balsas\_USDA PI566686\_AY108957

athtagtcaa-gggcagggttttgtgaaatacgcccaa-ttgccagtatggcgtcttcacatta----  
tgtcgaagaaggaaatcgattgagttatgtgtggtgaaagaaagtgggtagacaaatattact----  
gactggtgaaagctaccaataggccatccgcacattaatgaccatgtttaggagttgttgctatgtactaacagaactgc  
atgttttgttgt---gtggctccattctgacttgt---  
gaaatgaactctcggtaagtcatagggcatttcatgtttgtacaggcagtaggttttagctttctggatgttagctaaat  
tca-aagcatcatc

>Jalisco\_INIFAP JSG y MAS 264\_AY108957

athtagtcaaagggcagggttttgtgaaatacgcccaa-ttgccagtatggcgtcttcacatta----  
tgtcgaagaaggaaatcgattgagttatgtgtggtgaaagaaagtgggtagacaaatattact----  
gactggtgaaagctaccaataggccatccgcacattaatgaccatgtttaggagttgttgctatgtactaacagaactgc  
atgttttgttgt---gtggctccattctgacttgt---  
gaaatgaactctcggtaagtcatagggcatttcatgtttgtacaggcagtaggttttagctttctggatgttagctaaat  
tca-aagcatcatc

>Tripsacum\_WW-2120\_AY108957

athtagtcaa-gagcagggttttgtgaaatacgcccaa-  
ttgccagtatggcgtcttcacattaattatgtcgaagaaggaaatcgattgagttatgtgtggtgaaagaaagtgggtag  
acaaatattgct----aactg---  
acagctaccaataggccatccgcacattaattaccatgtttaggagttgttagctatgtactaacagaactgcatgttttgc  
ttgttgtgtggctccattctgacttgttgtgaaatgaactctcgatcagtcagtagggcatttcatgtttgtacaggcag  
taggttttagcttctggatgttagttaaattcataagcatcatc

>B73\_AY108255

ctgacatttgatagcgaaccagtagagaatacgcccagggcacgtcgacctcggaatggcttcacatgcagattggcag  
tggctatgaaaggggttcatgaacgagatgaatccag-  
gcagccgctaataaaagtgaaccatgatcaatcatggccgtgctttagatcattctttttcattttttt--  
gaaaccatcatgttccagacgcattttttattcatgcttggagctgtaattccagccggaacatgtatttttgatgagggc  
gctcatttggttccccatctgaatctcaagactggttctgctgttcatgta

>Oh43\_AY108255

ctgacatttgatagcgaaccagtagagaatacgcccagggcacgtcgacctcggaatggcttcacatgcagattggcag  
tggctatgaaaggggttcatgaacgagatgaatccag-  
gcagccgctaataaaagtgaaccatgatcaatcatggccgtgctttagatcattctttttcattttttt--  
gaaaccatcatgttccagacgcattttttattcatgcttggagctgtaattccagccggaacatgtatttttgatgagggc  
gctcatttggttccccatctgaatctcaagactggttctgctgt-----

>IL14H\_AY108255

ctgacatttgatagcgaaccagtagagaatacgcccagggcacgtcgacctcggaatggcttcacatgcagattggcag  
tggctatgaaaggggttcatgaacgagatgaatccag-  
gcagccgctaataaaagtgaaccatgatcaatcatggccgtgctttagatcattctttttcattttttt--  
gaaaccatcatgttccagacgcattttttattcatgcttggagctgtaattccagccggaacatgtatttttgatgagggc  
gctcatttggttccccatctgaatctcaagactggttctgctgt-----

>Mo17\_AY108255

ctgacatttgatagcgaaccagtagagaatacgcccagggcacgtcgacctcggaatggcttcacatgcagattggcag  
tggctatgaaaggggttcatgaacgagatgaatccag-  
gcagccgctaataaaagtgaaccatgatcaatcatggccgtgctttagatcattctttttcattttttt--  
gaaaccatcatgttccagacgcattttttattcatgcttggagctgtaattccagccggaacatgtatttttgatgagggc  
gctcatttggttccccatctgaatctcaagactggttctgctgttcatgta

>Ky21\_AY108255

ctgacatttgatagcgaaccagtagagaatacgcccagggcacgtcgacctcggaatggcttcacatgcagattggcag  
tggctatgaaaggggttcatgaacgagatgaatccag-  
gcagccgctaataaaagtgaaccatgatcaatcatggccgtgctttagatcattctttttcattttttt--  
gaaaccatcatgttccagacgcattttttattcatgcttggagctgtaattccagccggaacatgtatttttgatgagggc  
gctcatttggttccccatctgaatctcaagactggttctgctgt-----

>M37W\_AY108255

ctgacatttgatagcgaaccagtagagaatacgcccagggcacgtcgacctcggaatggcttcacatgcagattggcag  
tggctatgaaaggggttcatgaacgagatgaatccag-  
gcagccgctaataaaagtgaaccatgatcaatcatggccgtgctttagatcattctttttcattttttt--  
gaaaccatcatgttccagacgcattttttattcatgcttggagctgtaattccagccggaacatgtatttttgatgagggc  
gctcatttggttccccatctgaatctcaagactggttctgctgt-----

>HP301\_AY108255

---

acatttgatagcgaaccagtagagaatacgcccagggcacgtcgacctcggaatggcttcacatgcagattggcagtg  
ctatgaaaggggttcatgaacgagatgaatccag-  
gcagccgctaataaaagtgaaccatgatcaatcatggccgtgctttagatcattctttttcattttttt--  
gaaaccatcatgttccagacgcattttttattcatgcttggagctgtaattccagccggaacatgtatttttgatgagggc  
gctcatttggttccccatctgaatctcaagactggttctgctgtt-----

>CML247\_AY108255

---

acatttgatagcgaaccagtagagaatacgcccagggcacgtcgacctcggaatggcttcacatgcagattggcagtg  
ctatgaaaggggttcatgaacgagatgaatccag-  
gcagccgctaataaaagtgaaccatgatcaatcatggccgtgctttagatcattctttttcattttttt--  
gaaaccatcatgttccagacgcattttttattcatgcttggagctgtaattccagccggaacatgtatttttgatgagggc  
gctcatttggttccccatctgaatctcaagactggttctgctgttcatgta

>NC350\_AY108255

-----

acgcaaccagtagagaatacgcccagggcacgtcgacctcggaatggcttcacatgcagattggcagtggttcatgaa  
gggttcatgaacgagatgaatccag-  
gcagccgctaataaaagtgaaccatgatcaatcatggccgtgctttagatcattctttttcattttttt--  
gaaaccatcatgttccagacgcattttttattcatgcttggagctgtaattccagccggaacatgtatttttgatgagggc

gctcatttggttccccatctgaatctcaagactgtttctgctgt-----

>Ki3\_AY108255

---

acatttgatacgcaaaccagtagagaatacgcccagggcacgtcgacctcggaatggcttcacatgcagattggcagtggt  
ctatgaaaggggtttcatgaacgagatgaatccag-

gcagccgctaataaaagtgaaccatgatcaatcatggccgtgctttagatcattctttttcattttttt--

gaaaccatcatgttccagacgcattttttattcatgcttggagctgtaattccagccggaacatgtatttttgatgagggc

gctcatttggttccccatctgaatctcaagactgtttctgctgt-----

>Kill\_AY108255

ctgacatttgatacgcaaaccagtagagaatacgcccagggcacgtcgacctcggaatggcttcacatgcagattggcag  
tggctatgaaaggggtttcatgaacgagatgaatccag-

gcagccgctaataaaagtgaaccatgatcaatcatggccgtgctttagatcattctttttcattttttt--

gaaaccatcatgttccagacgcattttttattcatgcttggagctgtaattccagccggaacatgtatttttgatgagggc

gctcatttggttccccatctgaatctcaagactgtttctgctgttcatgta

>CML333\_AY108255

ctgacatttgatacgcaaaccagtagagaatacgcccagggcacgtcgacctcggaatggcttcacatgcagattggcag  
tggctatgaaaggggtttcatgaacgagatgaatccag-

gcagccgctaataaaagtgaaccatgatcaatcatggccgtgctttagatcattctttttcattttttt--

gaaaccatcatgttccagacgcattttttattcatgcttggagctgtaattccagccggaacatgtatttttgatgagggc

gctcatttggttccccatctgaatctcaagactgtttctgctgttcatgta

>CML322\_AY108255

ctgacatttgatacgcaaaccagtagagaatacgcccagggcacgtcgacctcggaatggcttcacatgcagattggcag  
tggctatgaaaggggtttcatgaacgagatgaatccag-

gcagccgctaataaaagtgaaccatgatcaatcatggccgtgctttagatcattctttttcattttttt--

gaaaccatcatgttccagacgcattttttattcatgcttggagctgtaattccagccggaacatgtatttttgatgagggc

gctcatttggttccccatctgaatctcaagactgtttctgctgtt-----

>CML69\_AY108255

-----

tttgatacgcaaaccagtagagaatacgcccagggcacgtcgacctcggaatggcttcacatgcagattggcagtggtta  
tgaaaggggtttcatgaacgagatgaatccag-

gcagccgctaataaaagtgaaccatgatcaatcatggccgtgctttagatcattctttttcattttttt--

gaaaccatcatgttccagacgcattttttattcatgcttggagctgtaattccagccggaacatgtatttttgatgagggc

gctcatttggttccccatctgaatctcaagactgtttctgctgt-----

>Assinboine\_PI213793\_AY108255

ctgacatttgatacgcaaaccagtagagaatacgcccagggcacgtcgacctcggaatggcttcacatgcagattggcag  
tggctatgaaaggggtttcatgaacgagatgaatccag-

gcagccgctaataaaagtgaaccatgatcaatcatggccgtgctttagatcattctttttcattttttt--

gaaaccatcatgttccagacgcattttttattcatgcttggagctgtaattccagccggaacatgtatttttgatgagggc

gctcatttggttccccatctgaatctcaagactgtttctgctgttcatgta

>Gordo\_CHH\_160\_AY108255

ctgacatttgatacgcaaaccagtagagaatacgcccagggcacgtcgacctcggaatggcttcacatgcagattggcag  
tggctatgaaaggggtttcatgaacgagatgaatccag-

gcagccgctaataaaagtgaaccatgatcaatcatggccgtgctttagatcattctttttcattttttt--

gaaaccatcatgttccagacgcattttttattcatgcttggagctgtaattccagccggaacatgtatttttgatgagggc

gctcatttggttccccatctgaatctcaagactgtttctgctgttcatgta

>Guirua\_MAG\_450\_AY108255

ctgacatttgatacgcaaaccagtagagaatacgcccagggcacgtcgacctcggaatggcttcacatgcagattggcag  
tggctatgaaaggggtttcatgaacgagatgaatccag-

gcagccgctaataaaagtgaaccatgatcaatcatggccgtgctttagatcattctttttcattttttt--

gaaaccatcatgttccagacgcattttttattcatgcttggagctgtaattccagccggaacatgtatttttgatgagggc

gctcatttggttccccatctgaatctcaagactgtttctgctgttcatgta

>Nal-tel\_YUC\_7\_AY108255

ctgacatttgatacgcaaaccagtagagaatacgcccagggcacgtcgacctcggaatggcttcacatgcagattggcag  
tggctatgaaaggggtttcatgaacgagatgaatccag-

gcagccgctaataaaagtgaaccatgatcaatcatggccgtgctttagatcattctttttcattttttt--

gaaaccatcatgttccagacgcattttttattcatgcttggagctgtaattccagccggaacatgtatttttgatgagggc

gctcatttggttccccatctgaatctcaagactgtttctgctgttcatgta

>Pisscotunto\_APC 13\_AY108255

ctgacatttgatagcgaaccagtagagaatacgcacagggcagctcgacctcggaatggcttcacatgcagattggcag  
tggctatgaaaggggtttcatgaacgagatgaatccag-  
gcagccgctaataaaagtgaacctgatcaatcatggccgtgctttagatcattctttttcatttttttt--  
gaaaccatcatgttccagacgcattttttattcatgcttggagctgtaattccagccggaacatgtatttttgatgaggc  
gctcatttggtttcccatctgaatctcaagactggtttctgctgttcatgta

>Sabanero\_SAN 329\_AY108255

ctgacatttgatagcgaaccagtagagaatacgcacagggcagctcgacctcggaatggcttcacatgcagattggcag  
tggctatgaaaggggtttcatgaacgagatgaatccag-  
gcagccgctaataaaagtgaacctgatcaatcatggccgtgctttagatcattctttttcatttttttt--  
gaaaccatcatgttccagacgcattttttattcatgcttggagctgtaattccagccggaacatgtatttttgatgaggc  
gctcatttggtttcccatctgaatctcaagactggtttctgctgttcatgta

>Serrano\_GUA 14\_AY108255

ctgacatttgatagcgaaccagtagagaatacgcacagggcagctcgacctcggaatggcttcacatgcagattggcag  
tggctatgaaaggggtttcatgaacgagatgaatccag-  
gcagccgctaataaaagtgaacctgatcaatcatggccgtgctttagatcattctttttcatttttttt--  
gaaaccatcatgttccagacgcattttttattcatgcttggagctgtaattccagccggaacatgtatttttgatgaggc  
gctcatttggtttcccatctgaatctcaagactggtttctgctgttcatgta

>Zapalote\_Chico\_OAX 70\_AY108255

ctgacatttgatagcgaaccagtagagaatacgcacagggcagctcgacctcggaatggcttcacatgcagattggcag  
tggctatgaaaggggtttcatgaacgagatgaatccag-  
gcagccgctaataaaagtgaacctgatcaatcatggccgtgctttagatcattctttttcatttttttt--  
gaaaccatcatgttccagacgcattttttattcatgcttggagctgtaattccagccggaacatgtatttttgatgaggc  
gctcatttggtttcccatctgaatctcaagactggtttctgctgttcatgta

>Bolita\_OAX 68\_AY108255

ctgacatttgatagcgaaccagtagagaatacgcacagggcagctcgacctcggaatggcttcacatgcagattggcag  
tggctatgaaaggggtttcatgaacgagatgaatccag-  
gcagccgctaataaaagtgaacctgatcaatcatggccgtgctttagatcattctttttcatttttttt--  
gaaaccatcatgttccagacgcattttttattcatgcttggagctgtaattccagccggaacatgtatttttgatgaggc  
gctcatttggtttcccatctgaatctcaagactggtttctgctgttcatgta

>Cateto\_Sulino\_URG 11\_AY108255

ctgacatttgatagcgaaccagtagagaatacgcacagggcagctcgacctcggaatggcttcacatgcagattggcag  
tggctatgaaaggggtttcatgaacgagatgaatccag-  
gcagccgctaataaaagtgaacctgatcaatcatggccgtgctttagatcattctttttcatttttttt--  
gaaaccatcatgttccagacgcattttttattcatgcttggagctgtaattccagccggaacatgtatttttgatgaggc  
gctcatttggtttcccatctgaatctcaagactggtttctgctgttcatgta

>Chalqueno\_MEX 48\_AY108255

ctgacatttgatagcgaaccagtagagaatacgcacagggcagctcgacctcggaatggcttcacatgcagattggcag  
tggctatgaaaggggtttcatgaacgagatgaatccag-  
gcagccgctaataaaagtgaacctgatcaatcatggccgtgctttagatcattctttttcatttttttt--  
gaaaccatcatgttccagacgcattttttattcatgcttggagctgtaattccagccggaacatgtatttttgatgaggc  
gctcatttggtttcccatctgaatctcaagactggtttctgctgttcatgta

>Conico\_PUE 32\_AY108255

ctgacatttgatagcgaaccagtagagaatacgcacagggcagctcgacctcggaatggcttcacatgcagattggcag  
tggctatgaaaggggtttcatgaacgagatgaatccag-  
gcagccgctaataaaagtgaacctgatcaatcatggccgtgctttagatcattctttttcatttttttt--  
gaaaccatcatgttccagacgcattttttattcatgcttggagctgtaattccagccggaacatgtatttttgatgaggc  
gctcatttggtttcccatctgaatctcaagactggtttctgctgttcatgta

>Costeno\_VEN 453\_AY108255

ctgacatttgatagcgaaccagtagagaatacgcacagggcagctcgacctcggaatggcttcacatgcagattggcag  
tggctatgaaaggggtttcatgaacgagatgaatccag-  
gcagccgctaataaaagtgaacctgatcaatcatggccgtgctttagatcattctttttcatttttttt--  
gaaaccatcatgttccagacgcattttttattcatgcttggagctgtaattccagccggaacatgtatttttgatgaggc  
gctcatttggtttcccatctgaatctcaagactggtttctgctgttcatgta

>Cristalino\_Norteno\_CHI 349\_AY108255

ctgacatttgatagcgaaccagtagagaatacgcacagggcagctcgacctcggaatggcttcacatgcagattggcag  
tggctatgaaaggggtttcatgaacgagatgaatccag-



gcagccgctaataaaagtgaaccatgatcaatcatggccgtgcttgttagatcattctttttcattttttt--  
gaaaccatcatgttccagacgcattttttattcatgcttggagctgtaattccagccggaacatgtatttttgatgagggc  
gctcatttggtttcccatctgaatctcaagactggttctgctgttcatgta  
>Dzit Bacal\_GUA 131\_AY108255  
ctgacatttgatagcgaaccagtagagaatacgcaccagggcacgtcgacctcggaatggcttcacatgcagattggcag  
tggctatgaaaggggtttcatgaacgagatgaatccag-  
gcagccgctaataaaagtgaaccatgatcaatcatggccgtgcttgttagatcattctttttcattttttt--  
gaaaccatcatgttccagacgcattttttattcatgcttggagctgtaattccagccggaacatgtatttttgatgagggc  
gctcatttggtttcccatctgaatctcaagactggttctgctgttcatgta  
>Jalisco\_Benz 967\_AY108255  
ctgacatttgatagcgaaccagtagagaatacgcaccagggcacgtcgacctcggaatggcttcacatgcagattggcag  
tggctatgaaaggggtttcatgaacgagatgaatccag-  
gcagccgctaataaaagtgaaccatgatcaatcatggccgtgcttgttagatcattctttttcattttttt--  
gaaaccatcatgttccagacgcattttttattcatgcttggagctgtaattccagccggaacatgtatttttgatgagggc  
gctcatttggtttcccatctgaatctcaagactggttctgctgttcatgta  
>Balsas\_Kato Site 4\_AY108255  
ctgacatttgatagcgaaccagtagagaatacgcaccagggcacgtcgacctcggaatggcttcacatgcagattggcag  
tggctatgaaaggggtttcctgaacgagatgaatccag-  
gcagccgctaataaaagtgaaccatgatcaatcatggccgtgcttgttagatcattctttttcattttttt--  
gaaaccatcatgttccagacgcattttttattcatgcttggagctgtaattccagccggaacatgtatttt-  
gatgagggcgtcatttggtttcccatctgaatctcaagactggttctgctgttcatgta  
>Balsas\_Wilkes Site 6\_AY108255  
ctgacatttgatagcgaaccagtagagaatacgcaccagggcacgtcgacctcggaatggcttcacatgcagattggcag  
tggctatgaaaggggtttcatgaacgagatgaatccag-  
gcagccgctaataaaagtgaaccatgatcaatcatggccgtgcttgttagatcattctttttcattttttt--  
gaaaccatcatgttccagacgcattttttattcatgcttggagctgtaattccagccggaacatgtatttt-  
gatgagggcgtcatttggtttcccatctgaatctcaagactggttctgctgttcatgta  
>Balsas\_INIFAP JSP y Lo5130\_AY108255  
ctgacatttgatagcgaaccagtagagaatacgcaccagggcacgtcgacctcggaatggcttcacatgcagattggcag  
tggctatgaaaggggtttcatgaacgagatgaatccag-  
gcagccgctaataaaagtgaaccatgatcaatcatggccgtgcttgttagatcattctttttcattttttt--  
gaaaccatcatgttccagacgcattttttattcatgcttggagctgtaattccagccggaacatgtatttttgatgagggc  
gctcatttggtttcccatctgaatctcaagactggttctgctgttcatgta  
>Balsas\_INIFAP JSG y LOS 119\_AY108255  
ctgacatttgatagcgaaccagtagagaatacgcaccagggcacgtcgacctcggaatggcttcacatgcagattggcag  
tggctatgaaaggggtttcatgaacgagatgaatccag-  
gcagccgctaataaaagtgaaccatgatcaatcatggccgtgcttgttagatcattctttttcattttttt--  
gaaaccatcatgttccagacgcattttttattcatgcttggagctgtaattccagccggaacatgtatttttgatgagggc  
gctcatttggtttcccatctgaatctcaagactggttctgctgttcatgta  
>Balsas\_CIMMYT 8783\_AY108255  
ctgacatttgatagcgaaccagtagagaatacgcaccagggcacgtcgacctcggaatggcttcacatgcagattggcag  
tggctatgaaaggggtttcatgaacgagatgaatccag-  
gcagccgctaataaaagtgaaccatgatcaatcatggccgtgcttgttagatcattctttttcattttttt--  
gaaaccatcatgttccagacgcattttttattcatgcttggagctgtaattccagccggaacatgtatttttgatgagggc  
gctcatttggtttcccatctgaatctcaagactggttctgctgttcatgta  
>Oaxaca\_INIFAP JSG 197\_AY108255  
ctgacatttgatagcgaaccagtagagaatacgcaccagggcacgtcgacctcggaatggcttcacatgcagattggcag  
tggctatgaaaggggtttcatgaacgagatgaatccag-  
gcagccgctaataaaagtgaaccatgatcaatcatggccgtgcttgttagatcattctttttcattttttt--  
gaaaccatcatgttccagacgcattttttattcatgcttggagctgtaattccagccggaacatgtatttttgatgagggc  
gctcatttggtttcccatctgaatctcaagactggttctgctgttcatgta  
>Balsas\_INIFAP JSG y LOS 109\_AY108255  
ctgacatttgatagcgaaccagtagagaatacgcaccagggcacgtcgacctcggaatggcttcacatgcagattggcag  
tggctatgaaaggggtttcatgaacgagatgaatccag-  
gcagccgctaataaaagtgaaccatgatcaatcatggccgtgcttgttagatcattctttttcattttttt--  
gaaaccatcatgttccagacgcattttttattcatgcttggagctgtaattccagccggaacatgtatttt-  
gatgagggcgtcatttggtttcccatctgaatctcaagactggttctgctgttcatgta

>Balsas\_INIFAP JSG 378\_AY108255

ctgacatttgatagcgaaccagtagagaatacgcccagggcacgctcgacctcggaatggcttcacatgcagattggcag  
tggctatgaaaggggtttcatgaacgagatgaatccag-  
gcagccgctaataaaagtgaacctgatcaatcatggccgtgcttgttagatcattctttttcatttttttt--  
gaaaccatcatgttccagacgcattttttattcatgcttggagctgtaattccagccggaacatgtatttt-  
gataagggcgtcattttttcccatctgaatctcaagactgtttctgctgttcatgta

>Balsas\_INIFAP JSG 374\_AY108255

ctgacatttgatagcgaaccagtagagaatacgcccagggcacgctcgacctcggaatggcttcacatgcagattggcag  
tggctatgaaaggggtttcatgaacgagatgaatccag-  
gcagccgctaataaaagtgaacctgatcaatcatggccgtgcttgttagatcattctttttcatttttttt--  
gaaaccatcatgttccagacgcattttttattcatgcttggagctgtaattccagccggaacatgtatttttgatgagggc  
gctcatttgtttcccatctgaatctcaagactgtttctgctgttcttctgta

>Balsas\_INIFAP JSG y LOS 161\_AY108255

ctgacatttgatagcgaaccagtagagaatacgcccagggcacgctcgacctcggaatggcttcacatgcagattggcag  
tggctatgaaaggggtttcatgaacgagatgaatccag-  
gcagccgctaataaaagtgaacctgatcaatcatggccgtgcttgttagatcattctttttcatttttttt--  
gaaaccatcatgttccagacgcattttttattcatgcttggagctgtaattccagccggaacatgtatttttgatgagggc  
gctcatttgtttcccatctgaatctcaagactgtttctgctgttcatgta

>Balsas\_CIMMYT 11355\_AY108255

ctgacatttgatagcgaaccagtagagaatacgcccagggcacgctcgacctcggaatggcttcacatgcagattggcag  
tggctatgaaaggggtttcatgaacgagatgaatccag-  
gcagccgctaataaaagtgaacctgatcaatcatggccgtgcttgttagatcattctttttcatttttttttgaacca  
tcatgttccagacgcattttttattcatgcttggagctgtaattccagccggaacatgtatttt-  
gataagggcgtcattttttcccatctgaatctcaagactgtttctgctgttcatgta

>Balsas\_USDA PI566686\_AY108255

ctgacatttgatagcgaaccagtagagaatacgcccagggcacgctcgacctcggaatggcttcacatgcagattggcag  
tggctatgaaaggggtttcatgaacgagatgaatccag-  
gcagccgctaataaaagtgaacctgatcaatcatggccgtgcttgttagatcattctttttcatttttttt--  
gaaaccatcatgttccagacgcattttttattcatgcttggagctgtaattccagccggaacatgtatttttgatgagggc  
gctcatttgtttcccatctgaatctcaagactgtttctgctgttcatgta

>Jalisco\_INIFAP JSG y MAS 264\_AY108255

ctgacatttgatagcgaaccagtagagaatacgcccagggcacgctcgacctcggaatggcttcacatgcagattggcag  
tggctatgaaaggggtttcatgaacgagatgaatccag-  
gcagccgctaataaaagtgaacctgatcaatcatggccgtgcttgttagatcattctttttcatttttttt--  
gaaaccatcatgttccagacgcattttttattcatgcttggagctgtaattccagccggaacatgtatttttgatgagggc  
gctcatttgtttcccatctgaatctcaagactgtttctgctgttcatgta

>Tripsacum\_WW-2120\_\_AY108255

ctgacatttgatagcgaaccagtagagaatacgcccagggcacgctcgacctcggaatggcttcacatgcagattggcag  
tggctatgaaaggggtttcatgaacgagatgaatgcagagtagccgctaataaaagtgaacctgaccaatcatggccgtg  
cttgttagatcattctttttcatttttt----  
gaaaccatcatgttccagacgcattttttattcatgcttggagctgtaattccagccggaacatgtatttt-  
gatgagggcgtcatttttgtttcccatctgaatctcaagactgtttctgctgttcatgta

>B73\_AY107195

-----aagaa-----

gcggtcagctgcaagatggacgggtgccttgccctcttcttcgactacttagctagtaattaggactatgtatgtaatgaat  
gtatatagtgccattaagacgcccattgccctggatttgaggtcccggcatttgatgaatcaa-  
ttgttcggaattgttaccttttagcagcaacgaacctga-  
gggtgtaggggtggccaggtgggagaagtgtgtatgtttctttcagtaacaatctttgtgcaagtgtatctgtatatagtcta  
ctgttttaataagcaatgttgtgcaacttgcg---

>Oh43\_AY107195

ggtttgaagaaagaagcgggtcagctgcaagatggacgggtgccttgccctcttcttcgactacttagctagtaattaggact  
atgtatgtaatgaatgtatatagtgccattaagacgcccattgccctggatttgaggtcccggcatttgatgaatcaa-  
ttgttcggaattgttaccttttagcagcaacgaacctga-  
gggtgtaggggtggccaggtgggagaagtgtgtatgtttctttcagtaacaatctttgtgcaagtgtatctgtatatagtcta

ctgttttaataagcaatggtgtgca-----

>IL14H\_AY107195

-----

aagaagcgggtcagctgcaagatggacgggtgccttgccctcttcttcgactacttagctagtaattaggactatgtatgtaa  
tgaatgtatatagtgccattaagacgcccattgcccctgggtattgaggtcccggcatttgtatgaatcaa-

ttgttcggaaattggttaccttttagcagcaacgaacctga-

gggtgtaggggtggccaggtgggagaagtgtatgtttctttcagtaacaatctttgtgcaagtgtatgtatatagtcta  
ctgttttaataagcaatggtgtgcaacttgcg--

>Mo17\_AY107195

--

ttgaagaagaagcgggtcagctgcaagatggacgggtgccttgccctcttcttcgactacttagctagtaattaggactat  
gtatgtaatgaatgtatatagtgccattaagacgcccattgcccctgggtattgaggtcccggcatttgtatgaatcaa-

ttgttcggaaattggttaccttttagcagcaacgaacctga-

gggtgtaggggtggccaggtgggagaagtgtatgtttctttcagtaacaatctttgtgcaagtgtatgtatatagtcta  
ctgttttaataagcaatggtgtgcaacttgcg--

>Ky21\_AY107195

---

ttgaagaagaagcgggtcagctgcaagatggacgggtgccttgccctcttcttcgactacttagctagtaattaggactatg  
tatgtaatgaatgtatatagtgccattaagacgcccattgcccctgggtattgaggtcccggcatttgtatgaatcaa-

ttgttcggaaattggttaccttttagcagcaacgaacctga-

gggtgtaggggtggccaggtgggagaagtgtatgtttctttcagtaacaatctttgtgcaagtgtatgtatatagtcta  
ctgttttaataagcaatggtgtgcaacttgcgct-

>M37W\_AY107195

ggtttgaagaagaagcgggtcagctgcaagatggacgggtgccttgccctcttcttcgactacttagctagtaattaggact  
atgtatgtaatgaatgtatatagtgccattaagacgcccattgcccctgggtattgaggtcccggcatttgtatgaatcaa-

ttgttcggaaattggttaccttttagcagcaacgaacctga-

gggtgtaggggtggccaggtgggagaagtgtatgtttctttcagtaacaatctttgtgcaagtgtatgtatatagtcta  
ctgttttaataagcaatggtgtgcaacttgcg--

>HP301\_AY107195

-----

aagaagcgggtcagctgcaagatggacgggtgccttgccctcttcttcgactacttagctagtaattaggactatgtatgtaa  
tgaatgtatatagtgccattaagacgcccattgcccctgggtattgaggtcccggcatttgtatgaatcaa-

ttgttcggaaattggttaccttttagcagcaacgaacctga-

gggtgtaggggtggccaggtgggagaagtgtatgtttctttcagtaacaatctttgtgcaagtgtatgtatatagtcta  
ctgttttaataagcaatggtgtgcaacttgcgctc

>CML247\_AY107195

-----

aagaagcgggtcagctgcaagatggacgggtgccttgccctcttcttcgactacttagctagtaattaggactatgtatgtaa  
tgaatgtatatagtgccattaagacgcccattgcccctgggtattgaggtcccggcatttgtatgaatcaa-

ttgttcggaaattggttaccttttagcagcaacgaacctga-

gggtgtaggggtggccaggtgggagaagtgtatgtttctttcagtaacaatctttgtgcaagtgtatgtatatagtcta  
ctgttttaataagcaatggtgtgcaacttgcgctc

>NC350\_AY107195

-----aagaa----

gcgggtcagctgcaagatggacgggtgccttgccctcttcttcgactacttagctagtaattaggactatgtatgtaatgaat  
gtatatagtgccattaagacgcccattgcccctgggtattgaggtcccggcatttgtatgaatcaa-

ttgttcggaaattggttaccttttagcagcaacgaacctga-

gggtgtaggggtggccaggtgggagaagtgtatgtttctttcagtaacaatctttgtgcaagtgtatgtatatagtcta  
ctgttttaataagcaatggtgtgcaac-----

>Ki3\_AY107195

ggtttgaagaagaagcgggtcagctgcaagatggacgggtgccttgccctcttcttcgactacttagctagtaattaggact  
atgtatgtaatgaatgtatatagtgccattaagacgcccattgcccctgggtattgaggtcccggcatttgtatgaatcaa-

ttgttcggaaattggttaccttttagcagcaacgaacctga-

gggtgtaggggtggccaggtgggagaagtgtatgtttctttcagtaacaatctttgtgcaagtgtatgtatatagtcta  
ctgttttaataagcaatggtgtgcaac-----

>Ki11\_AY107195

ggtttgaagaagaagcgggtcagctgcaagatggacgggtgccttgccctcttcttcgactacttagctagtaattaggact

atgtatgtaatgaatgtatatagtgccattaagacgccccatgccctgggtattgaggtcccggcatttgtatgaatcaa-  
ttgttcggaaattgttaccttttagcagcaacgaacctga-  
gggtgtaggggtggccaggtgggagaagtgtatgtttctttcagtaacaatctttgtgcaagtgatctgtatatagtcta  
ctgttttaataagcaatggtgtgcaacttgcgctc

>CML333\_AY107195

-----aagaa-----

gcggctcagctgcaagatggacgggtgccttgccctcttcttcgactacttagctagtaattaggactatgtatgtaatgaat  
gtatatagtgccattaagacgccccatgccctgggtattgaggtcccggcatttgtatgaatcaa-  
ttgttcggaaattgttaccttttagcagcaacgaacctga-  
gggtgtaggggtggccaggtgggagaagtgtatgtttctttcagtaacaatctttgtgcaagtgatctgtatatagtcta  
ctgttttaataagcaatggtgtgca-----

>CML322\_AY107195

ggtttgaagaaagaagcgggtcagctgcaagatggacgggtgccttgccctcttcttcgactacttagctagtaattaggact  
atgtatgtaatgaatgtatatagtgccattaagacgccccatgccctgggtattgaggtcccggcatttgtatgaatcaa-  
ttgttcggaaattgttaccttttagcagcaacgaacctga-  
gggtgtaggggtggccaggtgggagaagtgtatgtttctttcagtaacaatctttgtgcaagtgatctgtatatagtcta  
ctgttttaataagcaatggtgtgcaacttgcgctc

>CML69\_AY107195

-----

aagaagcgggtcagctgcaagatggacgggtgccttgccctcttcttcgactacttagctagtaattaggactatgtatgtaa  
tgaatgtatatagtgccattaagacgccccatgccctgggtattgaggtcccggcatttgtatgaatcaa-  
ttgttcggaaattgttaccttttagcagcaacgaacctga-  
gggtgtaggggtggccaggtgggagaagtgtatgtttctttcagtaacaatctttgtgcaagtgatctgtatatagtcta  
ctgttttaataagcaatggtgtgcaacttgcgctc

>Assinboine\_PI213793\_AY107195

ggtttgaagaaagaagcgggtcagctgcaagatggacgggtgccttgccctcttcttcgactacttagctagtaattaggact  
atgtatgtaatgaatgtatatagtgccattaagacgccccatgccctgggtattgaggtcccggcatttgtatgaatcaa-  
ttgttcggaaattgttaccttttagcagcaacgaacctga-  
gggtgtaggggtggccaggtgggagaagtgtatgtttctttcagtaacaatctttgtgcaagtgatctgtatatagtcta  
ctgttttaataagcaatggtgtgcaacttgcgctc

>Gordo\_CHH 160\_AY107195

-----

gtcagctgcaagatggacgggtgccttgccctcttcttcgactacttagctagtaattaggactatgtatgtaatgaatgta  
tatagtgccattaagacgccccatgccctgggtattgaggtcccggcatttgtatgaatcaa-  
ttgttcggaaattgttaccttttagcagcaacgaacctga-  
gggtgtaggggtggccaggtgggagaagtgtatgtttctttcagtaacaatctttgtgcaagtgatctgtatatagtcta  
ctgttttaataagcaatggtgtgcaacttgcgctc

>Guirua\_MAG 450\_AY107195

ggtttgaagaaagaagcgggtcagctgcaagatggacgggtgccttgccctcttcttcgactacttagctagtaattaggact  
atgtatgtaatgaatgtatatagtgccattaagacgccccatgccctgggtattgaggtcccggcatttgtatgaatcaa-  
ttgttcggaaattgttaccttttagcagcaacgaacctga-  
gggtgtaggggtggccaggtgggagaagtgtatgtttctttcagtaacaatctttgtgcaagtgatctgtatatagtcta  
ctgttttaataagcaatggtgtgcaacttgcgctc

>Pisscotunto\_APC 13\_AY107195

-----

gtcagctgcaagatggacgggtgccttgccctcttcttcgactacttagctagtaattaggactatgtatgtaatgaatgta  
tatagtgccattaagacgccccatgccctgggtattgaggtcccggcatttgtatgaatcaa-  
ttgttcggaaattgttaccttttagcagcaacgaacctga-  
gggtgtaggggtggccaggtgggagaagtgtatgtttctttcagtaacaatctttgtgcaagtgatctgtatatagtcta  
ctgttttaataagcaatggtgtgcaacttgcgctc

>Sabanero\_SAN 329\_AY107195

ggtt-

gaagaaagaagcgggtcagctgcaagatggacgggtgccttgccctcttcttcgactacttagctagtaattaggactatgta  
tgaatgaatgtatatagtgccattaagacgccccatgccctgggtattgaggtcccggcatttgtatgaatcaa-  
ttgttcggaaattgttaccttttagcagcaacgaacctga-  
gggtgtaggggtggccaggtgggagaagtgtatgtttctttcagtaacaatctttgtgcaagtgatctgtatatagtcta  
ctgttttaataagcaatggtgtgcaacttgcgctc

>Zapalote Chico\_OAX 70\_AY107195

-----

gCGGTcagctgcaagatggacggTgcctTgcctcttcttcgactacttagctagtaattaggactatgtatgtaatgaat  
gtatatagtGCCattaagacgcccattgcctggTattgaggtcccggcatttgtatgaatcaa-  
ttgttcggaaattgttaccttttagcagcaacgaacctga-  
gggtgtagggTggccaggtgggagaagTtgtatgtttctttcagtaacaatctttgtgcaagtgtatctgtatatagtcta  
ctgttttaataagcaatgttTgtgcaacttgcgctc

>Bolita\_OAX 68\_AY107195

ggtttgaagaaagaagcggTcagctgcaagatggacggTgcctTgcctcttcttcgactacttagctagtaattaggact  
atgtatgtaatgaatgtatatagtGCCattaagacgcccattgcctggTattgaggtcccggcatttgtatgaatcaa-  
ttgttcggaaattgttaccttttagcagcaacgaacctga-  
gggtgtagggTggccaggtgggagaagTtgtatgtttctttcagtaacaatctttgtgcaagtgtatctgtatatagtcta  
ctgttttaataagcaatgttTgtgcaacttgcgctc

>Cateto Sulino\_URG 11\_AY107195

ggtttgaagaaagaagcggTcagctgcaagatggacggTgcctTgcctcttcttcgactacttagctagtaattaggact  
atgtatgtaatgaatgtatatagtGCCattaagacgcccattgcctggTattgaggtcccggcatttgtatgaatcaa-  
ttgttcggaaattgttaccttttagcagcaacgaacctga-  
gggtgtagggTggccaggtgggagaagTtgtatgtttctttcagtaacaatctttgtgcaagtgtatctgtatatagtcta  
ctgttttaataagcaatgttTgtgcaacttgcgctc

>Chalqueno\_MEX 48\_AY107195

ggtttgaagaaagaagcggTcagctgcaagatggacggTgcctTgcctcttcttcgactacttagctagtaattaggact  
atgtatgtaatgaatgtatatagtGCCattaagacgcccattgcctggTattgaggtcccggcatttgtatgaatcaa-  
ttgttcggaaattgttaccttttagcagcaacgaacctga-  
gggtgtagggTggccaggtgggagaagTtgtatgtttctttcagtaacaatctttgtgcaagtgtatctgtatatagtcta  
ctgttttaataagcaatgttTgtgcaacttgcgctc

>Chapalote\_SIN 2\_AY107195

ggtttgaagaaagaagcggTcagctgcaagatggacggTgcctTgcctcttcttcgactacttagctagtaattaggact  
atgtatgtaatgaatgtatatagtGCCattaagacgcccattgcctggTattgaggtcccggcatttgtatgaatcaa-  
ttgttcggaaattgttaccttttagcagcaacgaacctga-  
gggtgtagggTggccaggtgggagaagTtgtatgtttctttcagtaacaatctttgtgcaagtgtatctgtatatagtcta  
ctgttttaataagcaatgttTgtgcaacttgcgctc

>Conico\_PUE 32\_AY107195

ggtttgaagaaagaagcggTcagctgcaagatggacggTgcctTgcctcttcttcgactacttagctagtaattaggact  
atgtatgtaatgaatgtatatagtGCCattaagacgcccattgcctggTattgaggtcccggcatttgtatgaatcaa-  
ttgttcggaaattgttaccttttagcagcaacgaacctga-  
gggtgtagggTggccaggtgggagaagTtgtatgtttctttcagtaacaatctttgtgcaagtgtatctgtatatagtcta  
ctgttttaataagcaatgttTgtgcaacttgcgctc

>Costeno\_VEN 453\_AY107195

ggtttgaagaaagaagcggTcagctgcaagatggacggTgcctTgcctcttcttcgactacttagctagtaattaggact  
atgtatgtaatgaatgtatatagtGCCattaagacgcccattgcctggTattgaggtcccggcatttgtatgaatcaa-  
ttgttcggaaattgttaccttttagcagcaacgaacctga-  
gggtgtagggTggccaggtgggagaagTtgtatgtttctttcagtaacaatctttgtgcaagtgtatctgtatatagtcta  
ctgttttaataagcaatgttTgtgcaacttgcgctc

>Cristalino Norteno\_CHI 349\_AY107195

ggtttgaagaaagaagcggTcagctgcaagatggacggTgcctTgcctcttcttcgactacttagctagtaattaggact  
atgtatgtaatgaatgtatatagtGCCattaagacgcccattgcctggTattgaggtcccggcatttgtatgaatcaa-  
ttgttcggaaattgttaccttttagcagcaacgaacctga-  
gggtgtagggTggccaggtgggagaagTtgtatgtttctttcagtaacaatctttgtgcaagtgtatctgtatatagtcta  
ctgttttaataagcaatgttTgtgcaacttgcgctc

>Dzit Bacal\_GUA 131\_AY107195

ggtttgaagaaagaagcggTcagctgcaagatggacggTgcctTgcctcttcttcgactacttagctagtaattaggact  
atgtatgtaatgaatgtatatagtGCCattaagacgcccattgcctggTattgaggtcccggcatttgtatgaatcaa-  
ttgttcggaaattgttaccttttagcagcaacgaacctga-  
gggtgtagggTggccaggtgggagaagTtgtatgtttctttcagtaacaatctttgtgcaagtgtatctgtatatagtcta  
ctgttttaataagca-----

>Jalisco\_Benz 967\_AY107195

ggtttgaagaaagaagcggTcagctgcaagatggacggTgcctTgcctcttcttcgactacttagctagtaattaggact

atgtatgtaatgaatgtatatagtgctattaagacgccccatgccctgggtattgaggtcccggcatttgtatgaatcaa-  
ttgttcggtaattgtttacctatagcagcaacgaacctga-  
gggtgtaggctggccaggtgggagaagatgtatgtttctttcagcaacaatctttgtgcaagtgatctgtatatagtcta  
ctgttttaataagcaatgttgtgcaacttgcgctc  
>Balsas\_Beadle & Kato Site 4\_AY107195  
ggtttgaagaaagaagcgggtcagctgcaagatggacgggtgccttgccctcttcttcgactacttagctagtaattaggact  
atgtatgtaatgaatgtatatagtgccattaagacgccccatgccctgggtattgaggtcccggcatttgtatgaatcaa-  
ttgttcggtaattgtttaccttttagcagcaacgaacctga-  
gggtgtaggggtggccaggtgggagaagatgtatgtttctttcagtaacaatctttgtgcaagtgatctgtatatagtcta  
ctgttttaataagcaatgttgtgcaacttgcgctc  
>Balsas\_Kato Site 4\_AY107195  
ggtttgaagaaagaagcgggtcagctgcaagatggacgggtgccttgccctcttcttcgactacttagctagtaattaggact  
atgtatgtaatgaatgtatatagtgccattaagacgccccatgccctgggtattgaggtcccggcatttgtatgaatcaa-  
ttgttcggaaattgtttaccttttagcagcaacgaacctga-  
gggtgtaggggtggccaggtggtagaagttgtatgtttctttcagtaacaatctttgtgcaagtgatctgtatatagtcta  
ctgttttaataagcaatgttgtgcaacttgcgctc  
>Balsas\_Wilkes Site 6\_AY107195  
ggtttgaagaaagaagcgggtcagctgcaagatggacgggtgccttgccctcttcttcgactacttagctagtaattaggact  
atgtatgtaatgaatgtatatagtgccattaagacgccccatgccctgggtattgaggtcccggcatttgtatgaatcaa-  
ttgttcggaaattgtttaccttttagcagcaacgaacctga-  
gggtgtaggggtggccaggtgggagaagttgtatgtttctttcagtaacaatctttgtgcaagtgatctgtatatagtcta  
ctgttttaataagcaatgttgtgcaacttgcgctc  
>Balsas\_INIFAP JSG y LOS 119\_AY107195  
ggtttgaagaaagaagcgggtcagctgcaagatggacgggtgccttgccctcttcttcgactacttagctagtaattaggact  
atgtatgtaatgaatgtatatagtgccattaagacgccccatgccctgggtattgaggtcccggcatttgtatgaatcaa-  
ttgttcggaaattgtttaccttttagcagcaacgaacctga-  
gggtgtaggggtggccaggtgggagaagttgtatgtttctttcagtaacaatctttgtgcaagtgatctgtatatagtcta  
ctgttttaataagcaatgttgtgcaacttgcgctc  
>Balsas\_INIFAP JSG y MAS 401\_AY107195  
ggtttgaagaaagaagcgggtcagctgcaagatggacgggtgccttgccctcttcttcgactacttagctagtaattaggact  
atgtatgtaatgaatgtatatagtgctattaagacgccccatgccctgggtattgaggtcccggcatttgtatgaatcaa-  
ttgttcggtaattgtttacctatagcagcaacgaacctga-  
gggtgtaggctggccaggtgggagaagatgtatgtttctttcagcaacaatctttgtgcaagtgatctgtatatagtcta  
ctgttttaataagcaatgttgtgcaacttgcgctc  
>Balsas\_CIMMYT 8783\_AY107195  
ggtttgaagaaagaagcgggtcagctgcaagatggacgggtgccttgccctcttcttcgactacttagctagtaattaggact  
atgtatgtaatgaatgtatatagtgccattaagacgccccatgccctgggtattgaggtcccggcatttgtatgaatcaaat  
tgttcggtaattgtttaccttttagcagcaacgaacctga-  
gggtctaggggtggccaggtgggagaagatgtatgtttctttcagtaacaatctttgtgcaagtgatctgtatatagtcta  
ctgttttaataagcaatgttgtgcaacttgcgctc  
>Oaxaca\_INIFAP JSG 197\_AY107195  
ggtttgaagaaagaagcgggtcagctgcaagatggacgggtgccttgccctcttcttcgactacttagctagtaattaggact  
atgtatgtaatgaatgtatatagtgccattaagacgccccatgccctgggtattgaggtcccggcatttgtatgaatcaa-  
ttgttcggaaattgtttaccttttagcagcaacgaacctga-  
gggtgtaggggtggccaggtgggagaagttgtatgtttctttcagtaacaatctttgtgcaagtgatctgtatatagtcta  
ctgttttaataagcaatgttgtgcaacttgcgctc  
>Balsas\_INIFAP JSG y LOS 109\_AY107195  
ggtttgaagaaagaagcgggtcagctgcaagatggacgggtgccttgccctcttcttcgactacttagctagtaattaggact  
atgtatgtaatgaatgtatatagtgccattaagacgccccatgccctgggtattgaggtcccggcatttgtatgaatcaa-  
ttgttcggtaattgtttaccttttagcagcaacgaacctga-ggggtgtaggggtggccaggtgggaga---  
tgtatgtttctttcagtaacaatctttgtgcaagtgatctgtatatagtctactgttttaataagcaatgttgtgcaact  
tgcgctc  
>Balsas\_INIFAP JSG 378\_AY107195  
ggtttgaagaaagaagcgggtcagctgcaagatggacgggtgccttgccctcttcttcgactacttagctagtaattaggact  
atgtatgtaatgaatgtatatagtgccattaagacgccccatgccctgggtattgaggtcccggcatttgtatgaatcaa-  
ttgttcggaaattgtttaccttttagcagcaacgaacctga-  
gggtgtaggggtggccaggtggtagaagttgtatgtttctttcagtaacaatctttgtgcaagtgatctgtatatagtcta

ctgttttaataagcaatggttgcaacttgcgctc  
>Balsas\_INIFAP JSG 374\_AY107195  
ggtttgaagaa----gcggtcagctgcaagatggacgggtgccttgccctc---  
gactacttagctagtaattaggactatgtatgtaaatgaatgtatatagtgccattaagacgccccatgccctggattgag  
gtcccggcatttgtatgaatcaa-ttgttcggtaattggttaccttttagcagcaacgaacctga-  
gggtgtaggggtggccaggtgggagaagatgtatgtttctttcagtaacaatctttgtgcaagtgtatctgtatatagtga  
ctgttttaataagcaatggttgcaacttgcgctc  
>Balsas\_INIFAP JSG y LOS 161\_AY107195  
ggtttgaagaaagaagcgggtcagctgcaagatggacgggtgccttgccctcttcttcgactacttagctagtaattaggact  
atgtatgtaaatgaatgtatatagtgccattaagacgccccatgcccctggattgaggtcccggcatttgtatgaatcaa-  
ttgttcggtaattggttaccttttagcagcaacgaacctga-  
gggtgtaggggtggccaggtgggagaagatgtatgtttctttcagtaacaatctttgtgcaagtgtatctgtatatagtcta  
ctgttttaataagcaatggttgcaacttgcgctc  
>Balsas\_CIMMYT 11355\_AY107195  
ggtttgaagaaagaagcgggtcagctgcaagatggacgggtgccttgccctcttcttcgactacttagctagtaattaggact  
atgtatgtaaatgaatgtatatagtgccattaagacgccccatgccctggattgaggtcccggcatttgtatgaatcaa-  
ttgttcggaaattggttaccttttagcagcaacgaacctga-  
gggtgtaggggtggccaggtgggagaagttgtatgtttctttcagtaacaatctttgtgcaagtgtatctgtatatagtcta  
ctgttttaataagcaatggttgcaacttgcgctc  
>Balsas\_USDA PI566686\_AY107195  
ggtttgaagaaagaagcgggtcagctgcaagatggacgggtgccttgccctcttcttcgactacttagctagtaattaggact  
atgtatgtaaatgaatgtatatagtgccattaagacgccccatgccctggattgaggtcccggcatttgtatgaatcaa-  
ttgttcggaaattggttaccttttagcagcaacgaacctga-  
gggtgtaggggtggccaggtgggagaagttgtatgtttctttcagtaacaatctttgtgcaagtgtatctgtatatagtcta  
ctgttttaataagcaatggttgcaacttgcgctc  
>Jalisco\_INIFAP JSG y MAS 264\_AY107195  
ggtttgaagaaagaagcgggtcagctgcaagatggacgggtgccttgccctcttcttcgactacttagctagtaattaggact  
atgtatgtaaatgaatgtatatagtgccattaagacgccccatgccctggattgaggtcccggcatttgtatgaatcaa-  
ttgttcggtaattggttaccttttagcagcaacgaacctga-  
gggtgtaggggtggccaggtgggagaagatgtatgtttctttcagtaacaatctttgtgcaagtgtatctgtatatagtcta  
ctgttttaataagcaatggttgcaacttgcgctc  
>Tripsacum\_WW-2120\_haplotype1\_AY107195  
ggtttgaagaaagaagtggtcagctgcaagatggacgggtgccttgccctcttcttcgactacttagctagtaattaggact  
atgtatgtaaatgaatgtatatagtgccattaagatgcccatgccctggattgaggtcccggcatttgtatgcatcaa-  
ttgttgggtaattggttatcttttagcagcaacgaacctaaaggggtgtagg-tggccaggtgggaga---  
tgtatgtttctttcagcaacaatctttgtgcaagtgtatctgtatatagtctactgttt-  
aataagcaatgctgtgcaacttgcgctc  
>Tripsacum\_WW-2120\_haplotype2\_AY107195  
ggtttgaagaaagaagtggtcagccgcaagatggacgggtgccttgccctcttcttcgactacttagctagtaattaggact  
atgtatgtaaatgaatgtatatagtgccattaagatgcccatgccctggattgaggtcccggcatttgtatgcatcaa-  
ttgttgggtaattggttatcttttagcagcaacgaacctaaaggggtgtagg-tggccaggtgggaga---  
tgtatgtttctttcagcaacaatctttgtgcaagtgtatctgtatatagtctactgttt-  
aataagcaatgctgtgcaacttgcgctc

>B73\_AY105850

ttgtgaaactgaaagaattgagagagaactgcaagacagatcttgagacgctcagcaattcttcaatgagaaaatgagtg  
ctgcatgttgcggtgctgaactgttagtttctgagacttagtatgatcagctggcttgtcttgaagcaagatgtgctga  
gattgaaccacaacttaggaattatgggtgcttaccatcaatttgggacttcaatttggctgtagtgattatcctatcat  
aaagcgttggcttagtatgctttagctgatgtaaaaaataaccatggtaaggttaggaactgtatgtttgtc

>Oh43\_AY105850

ttgtgaaactgaaagaattgagagagaactgcaagacagatcttgagacgctcagcaattcttcaatgagaaaatgagtg  
ctgcatgttgcggtgctgaactgttagtttctgagacttagtatgatcagctggcttgtcttgaagcaagatgtgctga  
gattgaaccacaacttaggaattatgggtgcttaccatcaatttgggacttcaatttggctgtagtgattatcctatcat  
aaagcgttggcttagtatgctttagctgatgtaaaaaataaccatggtaaggttaggaactgtatgtttgtc

>IL14H\_AY105850

-----  
tgagagagaactgcaagacagatcttgagacgctcagcaattcttcaatgagaaaatgagtgctgcatggtgctg  
aactgtagtctcctgagacttagtatgatcagctggcttgtcttgaagcaagatgtgctgagattgaaccacaacttag  
gaattatggtgcttaccatcaatttgggacttcaatttggctgtagtgattatcctatcataaagcgttggcttagt  
gctttagctgatgtaaaaataaacatggtaag-----

>Mo17\_AY105850

ttgtgaaactgaaagaattgagagagaactgcaagacagatcttgagacgctcagcaattcttcaatgagaaaatgagtg  
ctgcatggtgctgactgtagtctcctgagacttagtatgatcagctggcttgtcttgaagcaagatgtgctga  
gattgaaccacaacttaggaattatggtgcttaccatcaatttgggacttcaatttggctgtagtgattatcctatcat  
aaagcgttggcttagtatgctttagctgatgtaaaaataaacatggtaaggttaggaactgtatggttgtc

>Ky21\_AY105850

ttgtgaaactgaaagaattgagagagaactgcaagacagatcttgagacgctcagcaattcttcaatgagaaaatgagtg  
ctgcatggtgctgactgtagtctcctgagacttagtatgatcagctggcttgtcttgaagcaagatgtgctga  
gattgaaccacaacttaggaattatggtgcttaccatcaatttgggacttcaatttggctgtagtgattatcctatcat  
aaagcgttggcttagtatgctttagctgatgtaaaaataaacatggtaaggttaggaactgtatggttgtc

>M37W\_AY105850

ttgtgaaactgaaagaattgagagagaactgcaagacagatcttgagacgctcagcaattcttcaatgagaaaatgagtg  
ctgcatggtgctgactgtagtctcctgagacttagtatgatcagctggcttgtcttgaagcaagatgtgctga  
gattgaaccacaacttaggaattatggtgcttaccatcaatttgggacttcaatttggctgtagtgattatcctatcat  
aaagcgttggcttagtatgctttagctgatgtaaaaataaacatggtaaggttaggaactgtatggtt---

>HP301\_AY105850

ttgtgaaactgaaagaattgagagagaactgcaagacagatcttgagacgctcagcaattcttcaatgagaaaatgagtg  
ctgcatggtgctgactgtagtctcctgagacttagtatgatcagctggcttgtcttgaagcaagatgtgctga  
gattgaaccacaacttaggaattatggtgcttaccatcaatttgggacttcaatttggctgtagtgattatcctatcat  
aaagcgttggcttagtatgctttagctgatgtaaaaataaacatggtaaggttaggaactgtatggttgt-

>CML247\_AY105850

ttgtgaaactgaaagaattgagagagaactgcaagacagatcttgagacgctcagcaattcttcaatgagaaaatgagtg  
ctgcatggtgctgactgtagtctcctgagacttagtatgatcagctggcttgtcttgaagcaagatgtgctga  
gattgaaccacaacttaggaattatggtgcttaccatcaatttgggacttcaatttggctgtagtgattatcctatcat  
aaagcgttggcttagtatgctttagctgatgtaaaaataaacatggtaaggttaggaactgtatggttgt-

>NC350\_AY105850

ttgtgaaactgaaagaattgagagagaactgcaagacagatcttgagacgctcagcaattcttcaatgagaaaatgagtg  
ctgcatggtgctgactgtagtctcctgagacttagtatgatcagctggcttgtcttgaagcaagatgtgctga  
gattgaaccacaacttaggaattatggtgcttaccatcaatttgggacttcaatttggctgtagtgattatcctatcat  
aaagcgttggcttagtatgctttagctgatgtaaaaataaacatggtaaggttaggaactgtatggttgt-

>Ki3\_AY105850

ttgtgaaactgaaagaattgagagagaactgcaagacagatcttgagacgctcagcaattcttcaatgagaaaatgagtg  
ctgcatggtgctgactgtagtctcctgagacttagtatgatcagctggcttgtcttgaagcaagatgtgctga  
gattgaaccacaacttaggaattatggtgcttaccatcaatttgggacttcaatttggctgtagtgattatcctatcat  
aaagcgttggcttagtatgctttagctgatgtaaaaataaacatggtaag-----

>Ki11\_AY105850

ttgtgaaactgaaagaattgagagagaactgcaagacagatcttgagacgctcagcaattcttcaatgagaaaatgagtg  
ctgcatggtgctgactgtagtctcctgagacttagtatgatcagctggcttgtcttgaagcaagatgtgctga  
gattgaaccacaacttaggaattatggtgcttaccatcaatttgggacttcaatttggctgtagtgattatcctatcat  
aaagcgttggcttagtatgctttagctgatgtaaaaataaacatggtaaggttaggaactgtatggttgtc

>CML333\_AY105850

-

tgtgaaactgaaagaattgagagagaactgcaagacagatcttgagacgctcagcaattcttcaatgagaaaatgagtg  
tgcattgctgactgtagtctcctgagacttagtatgatcagctggcttgtcttgaagcaagatgtgctgag  
attgaaccacaacttaggaattatggtgcttaccatcaatttgggacttcaatttggctgtagtgattatcctatcata  
aagcgttggcttagtatgctttagctgatgtaaaaataaacatggta-----

>CML322\_AY105850

ttgtgaaactgaaagaattgagagagaactgcaagacagatcttgagacgctcagcaattcttcaatgagaaaatgagtg  
ctgcatggtgctgactgtagtctcctgagacttagtatgatcagctggcttgtcttgaagcaagatgtgctga  
gattgaaccacaacttaggaattatggtgcttaccatcaatttgggacttcaatttggctgtagtgattatcctatcat  
aaagcgttggcttagtatgctttagctgatgtaaaaataaacatggtaaggttaggaactgtatggttgtc

>Assinboine\_PI213793\_AY105850



ttgtgaaactgaaagaattgagagagaactgcaagacagatcttgagacgctcagcaattcttcaatgagaaaatgagtg  
ctgcatgttgcgcttgctgaactgtagtttctgagacttagtatgatcagctggcttgtcttgaagcaagatgtgctga  
gattgaaccacaacttaggaattatggtgcttaccatcaatttgggacttcaatttggctgtagtgattatcctatcat  
aaagcgttggcttagtatgctttagctgatgtaaaaaataaacatggtaaggttaggaactgtatgtttgtc

>Gordo\_CHH 160\_AY105850

ttgtgaaactgaaagaattgagagagaactgcaagacagatcttgagacgctcagcaattcttcaatgagaaaatgagtg  
ctgcatgttgcgcttgctgaactgtagtttctgagacttagtatgatcagctggcttgtcttgaagcaagatgtgctga  
gattgaaccacaacttaggaattatggtgcttaccatcaatttgggacttcaatttggctgtagtgattatcctatcat  
aaagcgttggcttagtatgctttagctgatgtaaaaaataaacatggtaaggttaggaactgtatgtttgtc

>Guirua\_MAG 450\_AY105850

ttgtgaaactgaaagaattgagagagaactgcaagacagatcttgagacgctcagcaattcttcaatgagaaaatgagtg  
ctgcatgttgcgcttgctgaactgtagtttctgagacttagtatgatcagctggcttgtcttgaagcaagatgtgctga  
gattgaaccacaacttaggaattatggtgcttaccatcaatttgggacttcaatttggctgtagtgattatcctatcat  
aaagcgttggcttagtatgctttagctgatgtaaaaaataaacatggtaaggttaggaactgtatgtttgtc

>Nal-tel\_YUC 7\_AY105850

ttgtgaaactgaaagaattgagagagaactgcaagacagatcttgagacgctcagcaattcttcaatgagaaaatgagtg  
ctgcatgttgcgcttgctgaactgtagtttctgagacttagtatgatcagctggcttgtcttgaagcaagatgtgctga  
gattgaaccacaacttaggaattatggtgcttaccatcaatttgggacttcaatttggctgtagtgattatcctatcat  
aaagcgttggcttagtatgctttagctgatgtaaaaaataaacatggtaaggttaggaactgtatgtttgtc

>Pisscotunto\_APC 13\_AY105850

ttgtgaaactgaaagaattgagagagaactgcaagacagatcttgagacgctcagcaattcttcaatgagaaaatgagtg  
ctgcatgttgcgcttgctgaactgtagtttctgagacttagtatgatcagctggcttgtcttgaagcaagatgtgctga  
gattgaaccacaacttaggaattatggtgcttaccatcaatttgggacttcaatttggctgtagtgattatcctatcat  
aaagcgttggcttagtatgctttagctgatgtaaaaaataaacatggtaaggttaggaactgtatgtttgtc

>Sabanero\_SAN 329\_AY105850

ttgtgaaactgaaagaattgagagagaactgcaagacagatcttgagacgctcagcaattcttcaatgagaaaatgagtg  
ctgcatgttgcgcttgctgaactgtagtttctgagacttagtatgatcagctggcttgtcttgaagcaagatgtgctga  
gattgaaccacaacttaggaattatggtgcttaccatcaatttgggacttcaatttggctgtagtgattatcctatcat  
aaagcgttggcttagtatgctttagctgatgtaaaaaataaacatggtaaggttaggaactgtatgtttgtc

>Serrano\_GUA 14\_AY105850

ttgtgaaactgaaagaattgagagagaactgcaagacagatcttgagacgctcagcaattcttcaatgagaaaatgagtg  
ctgcatgttgcgcttgctgaactgtagtttctgagacttagtatgatcagctggcttggcttgaagcaagatgtgctga  
gattgaaccacaacttaggaattatggtgcttaccatcaatttgggacttcaatttggctgtagtgattatcctatcat  
aaagcgttggcttagtatgctttagctgatgtaaaaaataaacatggtaaggttaggaactgtatgtttgtc

>Zapalote Chico\_OAX 70\_AY105850

ttgtgaaactgaaagaattgagagagaactgcaagacagatcttgagacgctcagcaattcttcaatgagaaaatgagtg  
ctgcatgttgcgcttgctgaactgtagtttctgagacttagtatgatcagctggcttgtcttgaagcaagatgtgctga  
gattgaaccacaacttaggaattatggtgcttaccatcaatttgggacttcaatttggctgtagtgattatcctatcat  
aaagcgttggcttagtatgctttagctgatgtaaaaaataaacatggtaaggttaggaactgtatgtttgtc

>Bolita\_OAX 68\_AY105850

ttgtgaaactgaaagaattgagagagaactgcaagacagatcttgagacgctcagcaattcttcaatgagaaaatgagtg  
ctgcatgttgcgcttgctgaactgtagtttctgagacttagtatgatcagctggcttgtcttgaagcaagatgtgctga  
gattgaaccacaacttaggaattatggtgcttaccatcaatttgggacttcaatttggctgtagtgattatcctatcat  
aaagcgttggcttagtatgctttagctgatgtaaaaaataaacatggtaaggttaggaactgtatgtttgtc

>Cateto Sulino\_URG 11\_AY105850

ttgtgaaactgaaagaattgagagagaactgcaagacagatcttgagacgctcagcaattcttcaatgagaaaatgagtg  
ctgcatgttgcgcttgctgaactgtagtttctgagacttagtatgatcagctggcttgtcttgaagcaagatgtgctga  
gattgaaccacaacttaggaattatggtgcttaccatcaatttgggacttcaatttggctgtagtgattatcctatcat  
aaagcgttggcttagtatgctttagctgatgtaaaaaataaacatggtaaggttaggaactgtatgtttgtc

>Chalqueno\_MEX 48\_AY105850

ttgtgaaactgaaagaattgagagagaactgcaagacagatcttgagacgctcagcaattcttcaatgagaaaatgagtg  
ctgcatgttgcgcttgctgaactgtagtttctgagacttagtatgatcagctggcttggcttgaagcaagatgtgctga  
gattgaaccacaacttaggaattatggtgcttaccatcaatttgggacttcaatttggctgtagtgattatcctatcat  
aaagcgttggcttagtatgctttagctgatgtaaaaaataaacatggtaaggttaggaactgtatgtttgtc

>Chapalote\_SIN 2\_AY105850

ttgtgaaactgaaagaattgagagagaactgcaagacagatcttgagacgctcagcaattcttcaatgagaaaatgagtg  
ctgcatgttgcgcttgctgaactgtagtttctgagacttagtatgatcagctggcttgtcttgaagcaagatgtgctga

gattgaaccacaacttaggaattatggtgcttaccatcaatttgggacttcaatttggctgtagtgattattcctatcat  
aaagcggttggcttagtatgctttagctgatgtaaaaaataaccatggtaaggttaggaactgtatgtttgtc  
>Conico\_PUE 32\_AY105850  
ttgtgaaactgaaagaattgagagagaactgcaagacagatcttgagacgctaagcaattctccaatgagaaaatgagtg  
ctgcatggtgctttagctgaactgtagtttctgagacttagtatgatcagctggcttggcttgaagcaagatgtgctga  
gattgaaccacaacttaggaattatggtgcttaccatcaatttgggacttcaatttggctgtagtgattattcctatcat  
aaagcggttggcttagtatgctttagctgatgtaaaaaataaccatggtaaggttaggaactgtatgtttgtc  
>Costeno\_VEN 453\_AY105850  
ttgtgaaactgaaagaattgagagagaactgcaagacagatcttgagacgctcagcaattcttcaatgagaaaatgagtg  
ctgcatggtgctttagctgaactgtagtttctgagacttagtatgatcagctggcttgtcttgaagcaagatgtgctga  
gattgaaccacaacttaggaattatggtgcttaccatcaatttgggacttcaatttggctgtagtgattattcctatcat  
aaagcggttggcttagtatgctttagctgatgtaaaaaataaccatggtaaggttaggaactgtatgtttgtc  
>Cristalino Norteno\_CHI 349\_AY105850  
ttgtgaaactgaaagaattgagagagaactgcaagacagatcttgagacgctcagcaattcttcaatgagaaaatgagtg  
ctgcatggtgctttagctgaactgtagtttctgagacttagtatgatcagctggcttgtcttgaagcaagatgtgctga  
gattgaaccacaacttaggaattatggtgcttaccatcaatttgggacttcaatttggctgtagtgattattcctatcat  
aaagcggttggcttagtatgctttagctgatgtaaaaaataaccatggtaaggttaggaactgtatgtttgtc  
>Dzit Bacal\_GUA 131\_AY105850  
ttgtgaaactgaaagaattgagagagaactgcaagacagatcttgagacgctcagcaattcttcaatgagaaaatgagtg  
ctgcatggtgctttagctgaactgtagtttctgagacttagtatgatcagctggcttgtcttgaagcaagatgtgctga  
gattgaaccacaacttaggaattatggtgcttaccatcaatttgggacttcaatttggctgtagtgattattcctatcat  
aaagcggttggcttagtatgctttagctgatgtaaaaaataaccatggtaaggttaggaactgtatgtttgtc  
>Jalisco\_Benz 967\_AY105850  
ttgtgaaactgaaagaattgagagagaactgcaagacagatcttgagacgctcagcaattcttcaatgagaaaatgagtg  
ctgcatggtgctttagctgaactgtagtttctgagacttagtatgatcagctggcttggcttgaagcaagatgtgctga  
gattgaaccacaacttaggaattatggtgcttaccatcaatttgggacttcaatttggctgtagtgattattcctatcat  
aaagcggttggcttagtatgctttagctgatgtaaaaaataaccatggtaaggttaggaactgtatgtttgtc  
>Balsas\_Beadle & Kato Site 4\_AY105850  
ttgtgaaactgaaagaattgagagagaactgcaagacagatcttgagacgctcagcaattcttcaatgagaaaatgagtg  
ctgcatggtgctttagctgaactgtagtttctgagacttagtatgatcagctggcttggcttgaagcaagatgtgctga  
gattgaaccacaacttaggaattatggtgcttaccatcaatttgggacttcaatttggctgtagtgattattcctatcat  
aaagcggttggcttagtatgctttagctgatgtaaaaaataaccatggtaaggttaggaactgtatgtttgtc  
>Balsas\_Kato Site 4\_AY105850  
ttgtgaaactgaaagaattgagagagaactgcaagacagatcttgagacgctcagcaattcttcaatgagaaaatgagtg  
ctgcatggtgctttagctgaactgtagtttctgagacttagtatgatcagctggcttggcttgaagcaagatgtgctga  
gattgaaccacaacttaggaattatggtgcttaccatcaatttgggacttcaatttggctgtagtgattattcctatcat  
aaagcggttgggcttagtatgctttagctgatgtaaaaaataaccatggtaaggttaggaactgtatgtttgtc  
>Balsas\_Wilkes Site 6\_AY105850  
ttgtgaaactgaaagaattgagagagaactgcaagacagatcttgagacgctcagcaattcttcaatgagaaaatgagtg  
ctgcatggtgctttagctgaactgtagtttctgagacttagtatgatcagctggcttggcttgaagcaagatgtgctga  
gattgaaccacaacttaggaattatggtgcttaccatcaatttgggacttcaatttggctgtagtgattattcctatcat  
aaagcggttggcttagtatgctttagctgatgtaaaaaataaccatggtaaggttaggaactgtatgtttgtc  
>Balsas\_INIFAP JSP y Lo5130\_AY105850  
ttgtgaaactgaaagaattgagagagaactgcaagacagatcttgagacgctcagcaattcttcaatgagaaaatgagtg  
ctgcatggtgctttagctgaactgtagtttctgagacttagtatgatcagctggcttggcttgaagcaagatgtgctga  
gattgaaccacaacttaggaattatggtgcttaccatcaatttggagacttcaatttggctgtagtgattattcctatcat  
aaagcggttggcttagtatgctttagctgatgtaaaaaataaccatggtaaggttaggaactgtatgtttgtc  
>Balsas\_INIFAP JSG y LOS 119\_AY105850  
ttgtgaaactgaaagaattgagagagaactgcaagacagatcttgagacgctcagcaattcttcaatgagaaaatgagtg  
ctgcatggtgctttagctgaactgtagtttctgagacttagtatgatcagctggcttggcttgaagcaagatgtgctga  
gattgaaccacaacttaggaattatggtgcttaccatcaatttgggacttcaatttggctgtagtgattattcctatcat  
aaagcggttggcttagtatgctttagctgatgtaaaaaataaccatggtaaggttaggaactgtatgtttgtc  
>Jalisco\_INIFAP JSG y MAS 401\_AY105850  
ttgtgaaactgaaagaattgagagagaactgcaagacagatcttgagacgctcagcaattcttcaatgagaaaatgagtg  
ctgcatggtgctttagctgaactgtagtttctgagacttagtatgatcagctggcttggcttgaagcaagatgtgctga  
gattgaaccacaacttaggaattatggtgcttaccatcaatttgggacttcaatttggctgtagtgattattcctatcat  
aaagcggttggcttagtatgctttagctgatgtaaaaaataaccatggtaaggttaggaactgtatgtttgtc

>Balsas\_CIMMYT 8783\_AY105850

ttgtgaaactgaaagaattgagagagaactgcaagacagatcttgagacgctcagcaattctccaatgagaaaatgagtg  
ctgcatgttgcgcttgctgaactgtagtttctgagacttagtatgatcagctggcttggcttgaagcaagatgtgctga  
gattgaaccacaacttaggaattatggtgcttaccatcaatttgggacttcaatttggctgtagtgattatcctatcat  
aaagcgttggctctagtagctgctttagctgatgtaaaaaataaacatggtaaggttaggaactgtatgtttgtc

>Oaxaca\_INIFAP JSG 197\_AY105850

ttgtgaaactgaaagaattgagagagaactgcaagacagatcttgagacgctcagcaattctccaatgagaaaatgagtg  
ctgcatgttgcgcttgctgaactgtagtttctgagacttagtatgatcagctggcttgtcttgaagcaagatgtgctga  
gattgaaccacaacttaggaattatggtgcttaccatcaatttgggacttcaatttggctgtagtgattatcctatcat  
aaagcgttggctctagtagctgctttagctgatgtaaaaaataaacatggtaaggttaggaactgtatgtttgtc

>Balsas\_INIFAP JSG y LOS 109\_AY105850

ttgtgaaactgaaagaattgagagagaactgcaagacagatcttgagacgctcagcaattctccaatgagaaaatgagtg  
ctgcatgttgcgcttgctgaactgtagtttctgagacttagtatgatcagctggcttggcttgaagcaagatgtgctga  
gattgaaccacaacttaggaattatggtgcttaccatcaatttgggacttcaatttggctgtagtgattatcctatcat  
aaagcgttggctctagtagctgctttagctgatgtaaaaaataaacatggtaaggttaggaactgtatgtttgtc

>Balsas\_INIFAP JSG 378\_AY105850

ttgtgaaactgaaagaattgagagagaactgcaagacagatcttgagacgctcagcaattctccaatgagaaaatgagtg  
ctgcatgttgcgcttgctgaactgtagtttctgagacttagtatgatcagctggcttggcttgaagcaagatgtgctga  
gattgaaccacaacttaggaattatggtgcttaccatcaatttgggacttcaatttggctgtagtgattatcctatcat  
aaagcgttggctctagtagctgctttagctgatgtaaaaaataaacatggtaaggttaggaactgtatgtttgtc

>Balsas\_INIFAP JSG 374\_AY105850

ttgtgaaactgaaagaattgagagagaactgcaagacagatcttgagacgctaagcaattctccaatgagaaaatgagtg  
ctgcatgttgcgcttgctgaactgtagtttctgagacttagtatgatcagctggcttggcttgaagcaagatgtgctga  
gattgaaccacaacttaggaattatggtgcttaccatcaatttgggacttcaatttggctgtagtgattatcctatcat  
aaagcgttggctctagtagctgctttagctgatgtaaaaaataaacatggtaaggttaggaactgtatgtttgtc

>Balsas\_INIFAP JSG y LOS 161\_AY105850

ttgtgaaactgaaagaattgagagagaactgcaagacagatcttgagacgctcagcaattctccaatgagaaaatgagtg  
ctgcatgttgcgcttgctgaactgtagtttctgagacttagtatgatcagctggcttggcttgaagcaagatgtgctga  
gattgaaccacaacttaggaattatggtgcttaccatcaatttgggacttcaatttggctgtagtgattatcctatcat  
aaagcgttggctctagtagctgctttagctgatgtaaaaaataaacatggtaaggttaggaactgtatgtttgtc

>Balsas\_CIMMYT 11355\_AY105850

ttgtgaaactgaaagaattgagagagaactgcaagacagatcttgagacgctcagcaattctccaatgagaaaatgagtg  
ctgcatgttgcgcttgctgaactgtagtttctgagacttagtatgatcagctggcttggcttgaagcaagatgtgctga  
gattgaaccacaacttaggaattatggtgcttaccatcaatttgggacttcaatttggctgtagtgattatcctatcat  
aaagcgttggctctagtagctgctttagctgatgtaaaaaataaacatggtaaggttaggaactgtatgtttgtc

>Balsas\_USDA PI566686\_AY105850

ttgtgaaactgaaagaattgagagagaactgcaagacagatcttgagacgctcagcaattctccaatgagaaaatgagtg  
ctgcatgttgcgcttgctgaactgtagtttctgagacttagtatgatcagctggcttggcttgaagcaagatgtgctga  
gattgaaccacaacttaggaattatggtgcttaccatcaatttgggacttcaatttggctgtagtgattatcctatcat  
aaagcgttggctctagtagctgctttagctgatgtaaaaaataaacatggtaaggttaggaactgtatgtttgtc

>Jalisco\_INIFAP JSG y MAS 264\_AY105850

ttgtgaaactgaaagaattgagagagaactgcaagacagatcttgagacgctcagcaattctccaatgagaaaatgagtg  
ctgcatgttgcgcttgctgaactgtagtttctgagacttagtatgatcagctggcttggcttgaagcaagatgtgctga  
gattgaaccacaacttaggaattatggtgcttaccatcaatttgggacttcaatttggctgtagtgattatcctatcat  
aaagcgttggctctagtagctgctttagctgatgtaaaaaataaacatggtaaggttaggaactgtatgtttgtc

>B73\_AY110109

cgtcgtgagcaagaaggccctcgacatcggcgatgaccccgagcgcctcccagggggccagaccatcagtgtcggcggca  
aggacgatgtgtccgcagtgagaagtctgcctgctgttcgctcttagcttgggaaggggtaggacatgtacttgggttgg  
ttggttacttgtgcagtagagagcgcaggacgtta-  
tttgagtcaggtccttgagctgtattcatgtgttaccagctgtctcgttgatttttgccatttgatacatttaattca  
ttcaggaattcagcctgcgggtatagcttagggacat

>Oh43\_AY110109

-----

cctcgacatcggcgatgaccccgagcgcctcccagggggccagaccatcagtgtcggcggcaaggacgatgtgtccgcag

tgaagaagtctgcctgctgttcgtcttagcttgggaaggggtaggacatgtacttgggttgggttgggttacttgtgcagta  
gagagcgcaggacgtta-  
tttgcagtcattgggtccttgagctgtattcatgtgttaccagctgtctcgttgatttttgccatttgatacatttaattca  
ttcaggaattcagcctgcgggtatagcttagggacat  
>IL14H\_AY110109

---

cgtgagcaagaaggccctcgacatcggcgatgaccccgagcgcctcccaggggcccagaccatcagtggtcggcggcaagg  
acgatgtgtccgcagtgagaagtctgcctgctgttcgtcttagcttgggaaggggtaggacatgtacttgggttgggtg  
gttacttgtgcagtagagagcgcaggacgtta-  
tttgcagtcattgggtccttgagctgtattcatgtgttaccagctgtctcgttgatttttgccatttgatacatttaattca  
ttcaggaattcagcctgcgggtatagcttaggga---

>Mo17\_AY110109

cgtcgtgagcaagaaggccctcgacatcggcgatgaccccgagcgcctcccaggggcccagaccatcagtggtcggcggca  
aggacgatgtgtccgcagtgagaagtctgcctgctgttcgtcttagcttgggaaggggtaggacatgtacttgggttgg  
ttgggttacttgtgcagtagagagcgcaggacgtta-  
tttgcagtcattgggtccttgagctgtattcatgtgttaccagctgtctcgttgatttttgccatttgatacatttaattca  
ttcaggaattcagcctgcgggtatagcttagggacat  
>Ky21\_AY110109

-----

tgagcaagaaggccctcgacatcggcgatgaccccgagcgcctcccaggggcccagaccatcagtggtcggcggcaaggac  
gatgtgtccgcagtgagaagtctgcctgctgttcgtcttagcttgggaaggggtaggacatgtacttgggttgggtggt  
tacttgtgcagtagagagcgcaggacgtta-  
tttgcagtcattgggtccttgagctgtattcatgtgttaccagctgtctcgttgatttttgccatttgatacatttaattca  
ttcaggaattcagcctgcgggtatagcttagggacat  
>M37W\_AY110109

-----

caagaaggccctcgacatcggcgatgaccccgagcgcctcccaggggcccagaccatcagtggtcggcggcaaggacgatg  
tgtccgcagtgagaagtctgcctgctgttcgtcttagcttgggaaggggtaggacatgtacttgggttgggttgggttact  
tgtgcagtagagagcgcaggacgtta-  
tttgcagtcattgggtccttgagctgtattcatgtgttaccagctgtctcgttgatttttgccatttgatacatttaattca  
ttcaggaattcagcctgcgggtatagcttagggac--

>HP301\_AY110109

-----

tggcgatgaccccgagcgcctcccaggggcccagaccatcagtggtcggcggcaaggacgatgtgtccgcagtgagaag  
tctgcctgctgttcgtcttagcttgggaaggggtaggacatgtacttgggttgggttgggttacttgtgcagtagagagcgc  
aggacgtta-  
tttgcagtcattgggtccttgagctgtattcatgtgttaccagctgtctcgttgatttttgccatttgatacatttaattca  
ttcaggaattcagcctgcgggt-----

>CML247\_AY110109

cgtcgtgagcaagaaggccctcgacatcggcgatgaccccgagcgcctcccaggggcccagaccatcagtggtcggcggca  
aggacgatgtgtccgcagtgagaagtctgcctgctgttcgtcttagcttgggaaggggtaggacatgtacttgggttgg  
ttgggttacttgtgcagtagagagcgcaggacgtta-  
tttgcagtcattgggtccttgagctgtattcatgtgttaccagctgtctcgttgatttttgccatttgatacatttaattca  
ttcaggaattcagcctgcgggtatagcttagggaca-

>NC350\_AY110109

-

gtcgtgagcaagaaggccctcgacatcggcgatgaccccgagcgcctcccaggggcccagaccatcagtggtcggcggcaa  
ggacgatgtgtccgcagtgagaagtctgcctgctgttcgtcttagcttgggaaggggtaggacatgtacttgggttgggt  
tgggttacttgtgcagtagagagcgcaggacgtta-  
tttgcagtcattgggtccttgagctgtattcatgtgttaccagctgtctcgttgatttttgccatttgatacatttaattca  
ttcaggaattcagcctgcgggtatagcttagggac--

>Ki3\_AY110109

cgtcgtgagcaagaaggccctcgacatcggcgatgaccccgagcgcctcccaggggcccagaccatcagtggtcggcggca  
aggacgatgtgtccgcagtgagaagtctgcctgctgttcgtcttagcttgggaaggggtaggacatgtacttgggttgg  
ttgggttacttgtgcagtagagagcgcaggacgtta-  
tttgcagtcattgggtccttgagctgtattcatgtgttaccagctgtctcgttgatttttgccatttgatacatttaattca  
ttcaggaattcagcctgcgggtatagcttaggg-----

>Kill\_AY110109

-----

ggcctcgacatcggcgatgaccccgagcgcctcccaggggcccagaccatcagtggtcggcggcaaggacgatgtgtccg  
cagtgaagaagtctgcctgctgttcgtcttagcttgggaagggggtaggacatgtacttgggttgggttacttgtgca  
gtagagagcgcaggacgtta-  
tttgagtcaggtccttgagctgtattcatgtgttaccagctgtctcgttgatTTTTGCCATTTGATACATTTAATTCA  
ttcaggaattcagcctgcgggtatagcttagg-----

>CML333\_AY110109

---

cgtgagcaagaaggccctcgacatcggcgatgaccccgagcgcctcccaggggcccagaccatcagtggtcggcggcaagg  
acgatgtgtccgcagtgagaagtctgcctgctgttcgtcttagcttgggaagggggtaggacatgtacttgggttgggtg  
gttacttgtgtagtagagagcgcaggacgtta-  
tttgagtcaggtccttgagctgtattcatgtgttaccagctgtctcgttgatTTTTGCCATTTGATACATTTAATTCA  
ttcaggaattcagcctgcgggtatagcttagggacat

>CML322\_AY110109

-----

gacctcgacatcggcgatgaccccgagcgcctcccaggggcccagaccatcagtggtcggcggcaaggacgatgtgtccgc  
agtgaagaagtctgcctgctgttcgtcttagcttgggaagggggtaggacatgtacttgggttgggttacttgtgca  
tagagagcgcaggacgtta-  
tttgagtcaggtccttgagctgtattcatgtgttaccagctgtctcgttgatTTTTGCCATTTGATACATTTAATTCA  
ttcaggaattcagcctgcgggtatagcttagggac--

>CML69\_AY110109

-----

agcaagaaggccctcgacatcggcgatgaccccgagcgcctcccaggggcccagaccatcagtggtcggcggcaaggacga  
tgtgtccgcagtgagaagtctgcctgctgttcgtcttagcttgggaagggggtaggacatgtacttgggttgggttgggtta  
cttgtgtagtagagagcgcaggacgtta-  
tttgagtcaggtccttgagctgtattcatgtgttaccagctgtctcgttgatTTTTGCCATTTGATACATTTAATTCA  
ttcaggaattcagcctgcgggt-----

>Assinboine\_PI213793\_AY110109

cgtcgtgagcaagaaggccctcgacatcggcgatgaccccgagcgcctcccaggggcccagaccatcagtggtcggcggca  
aggacgatgtgtccgcagtgagaagtctgcctgctgttcgtcttagcttgggaagggggtaggacatgtacttgggttgg  
ttgggttacttgtgtagtagagagcgcaggacgtta-  
tttgagtcaggtccttgagctgtattcatgtgttaccagctgtctcgttgatTTTTGCCATTTGATACATTTAATTCA  
ttcaggaattcagcctgcgggtatagcttagggacat

>Gordo\_CHH 160\_AY110109

cgtcgtgagcaagaaggccctcgacatcggcgatgaccccgagcgcctcccaggggcccagaccatcagtggtcggcggca  
aggacgatgtgtccgcagtgagaagtctgcctgctgttcgtcttagcttgggaagggggtaggacatgtacttgggttgg  
ttgggttacttgtgtagtagagagcgcaggacgtta-  
tttgagtcaggtccttgagctgtattcatgtgttaccagctgtctcgttgatTTTTGCCATTTGATACATTTAATTCA  
ttcaggaattcagcctgcgggtatagcttagggacat

>Guirua\_MAG 450\_AY110109

-----acatcggcgatgaccc-

gcagcgcctcccaggggcccagaccatcagtggtcggcggcaaggacgatgtgtccgcagtgagaagtctgcctgctgttc  
gtcttagcttgggaagggggtaggacatgtacttgggttgggttgggttacttgtgtagtagagagcgcaggacgtta-  
tttgagtcaggtccttgagctgtattcatgtgttaccagctgtctcgttgatTTTTGCCATTTGATACATTTAATTCA  
ttcaggaattcagcctgcgggtatagcttagggacat

>Nal-tel\_YUC 7\_AY110109

cgtcgtgagcaagaaggccctcgacatcggcgatgaccccgagcgcctcccaggggcccagaccatcagtggtcggcggca  
aggacgatgtgtccgcagtgagaagtctgcctgctgttcgtcttagcttgggaagggggtaggacatgtacttgggttgg  
ttgggttacttgtgtagtagagagcgcaggacgtta-  
tttgagtcaggtccttgagctgtattcatgtgttaccagctgtctcgttgatTTTTGCCATTTGATACATTTAATTCA  
ttcaggaattcagcctgcgggtatagcttagggacat

>Pisscotunto\_APC 13\_AY110109

cgtcgtgagcaagaaggccctcgacatcggcgatgaccccgagcgcctcccaggggcccagaccatcagtggtcggcggca  
aggacgatgtgtccgcagtgagaagtctgcctgctgttcgtcttagcttgggaagggggtaggacatgtacttgggttgg  
ttgggttacttgtgtagtagagagcgcaggacgtta-  
tttgagtcaggtccttgagctgtattcatgtgttaccagctgtctcgttgatTTTTGCCATTTGATACATTTAATTCA

ttcaggaattcagcctgcggggatagcttagggacat

>Sabanero\_SAN 329\_AY110109

cgtcgtgagcaagaaggccctcgacatcggcgatgaccccgagcgcctcccagggggccagaccatcagtgtcggcggca  
aggacgatgtgtccgcagtgagaagtctgcctgctgttcgtcttagcttgggaaggggtaggacatgtacttgggttgg  
ttggttacttgtgagtagagagcgcaggacgtta-

tttgcagtcatggtccttgagctgtattcatgtgttaccagctgtctcgttgatTTTTGCCATTTGATACATTTAATTCA  
ttcaggaattcagcctgcggggatagcttagggacat

>Serrano\_GUA 14\_AY110109

-----  
gatgaccccgagcgcctcccagggggccagaccatcagtgtcggcggcaaggacgatgtgtccgcggggaagaagtctgc  
ctgctgttcgtcttagcttgggaaggggtaggacatgtacttgggttgggttgggttacttgtgagtagagagcgcaggac  
gtta-

tttgcagtcatggtccttgagctgtattcatgtgttaccagctgtctcgttgatTTTTGCCATTTGATACATTTAATTCA  
ttcaggaattcagcctgcggggatagcttagggacat

>Zapalote\_Chico\_OAX 70\_AY110109

cgtcgtgagcaagaaggccctcgacatcggcgatgaccccgagcgcctcccagggggccagaccatcagtgtcggcggca  
aggacgatgtgtccgcagtgagaagtccgcctgctgttcgtcttagcttgggaaggggtaggacatgtacttgggttgg  
ttggttacttgtgagtagagagcgcaggacgtta-

tttgcagtcatggtccttgagctgtattcatgtgttaccagctgtctcgttgatTTTTGCCATTTGATACATTTAATTCA  
ttcaggaattcagcctgcggggatagcttagggacat

>Bolita\_OAX 68\_AY110109

cgtcgtgagcaagaaggccctcgacatcggcgatgaccccgagcgcctcccagggggccagaccatcagtgtcggcggca  
aggacgatgtgtccgcagtgagaagtctgcctgctgttcgtcttagcttgggaaggggtaggacatgtacttgggttgg  
ttggttacttgtgagtagagagcgcaggacgtta-

tttgcagtcatggtccttgagctgtattcatgtgttaccagctgtctcgttgatTTTTGCCATTTGATACATTTAATTCA  
ttcaggaattcagcctgcggggatagcttagggacat

>Cateto\_Sulino\_URG 11\_AY110109

-----  
tcgacatcggcgatgaccccgagcgcctcccagggggccagaccatcagtgtcggcggcaaggacgatgtgtccgcagtg  
aagaagtctgcctgctgttcgtcttagcttgggaaggggtaggacatgtacttgggttgggttgggttacttgtgagtaga  
gagcgcaggacgtta-

tttgcagtcatggtccttgagctgtattcatgtgttaccagctgtctcgttgatTTTTGCCATTTGATACATTTAATTCA  
ttcaggaattcagcctgcggggatagcttagggacat

>Chalqueno\_MEX 48\_AY110109

cgtcgtgagcaagaaggccctcgacatcggcgatgaccccgagcgcctcccagggggccagaccatcagtgttggcggca  
aggatgatgtgtccgcggggaagaagtctgcctgctgttcgtcttagcttgggaaggggtaggacatgtacttgggttgg  
ttggttacttgtgagtagagagcgcaggacgtta-

tttgcagtcatggtccttgagctgtattcatgtgttaccagctgtctcgttgatTTTTGCCATTTGATACATTTAATTCA  
ttcaggaattcagcctgctgggatagcttagggacat

>Chapalote\_SIN 2\_AY110109

cgtcgtgagcaagaaggccctcgacatcggcgatgaccccgagcgcctcccagggggccagaccatcagtgtcggcggca  
aggacgatgtgtccgcagtgagaagtctgcctgctgttcgtcttagcttgggaaggggtaggacatgtacttgggttgg  
ttggttacttgtgagtagagagcgcaggacgtta-

tttgcagtcatggtccttgagctgtattcatgtgttaccagctgtctcgttgatTTTTGCCATTTGATACATTTAATTCA  
ttcaggaattcagcctgcggggatagcttagggacat

>Conico\_PUE 32\_AY110109

cgtcgtgagcaagaaggccctcgacatcggcgatgaccccgagcgcctcccagggggccagaccatcagtgtcggcggca  
aggacgatgtgtccgcagtgagaagtctgcctgctgttcgtcttagcttgggaaggggtaggacatgtacttgggttgg  
ttggttacttgtgagtagagagcgcaggacgtta-

tttgcagtcatggtccttgagctgtattcatgtgttaccagctgtctcgttgatTTTTGCCATTTGATACATTTAATTCA  
ttcaggaattcagcctgcggggatagcttagggacat

>Costeno\_VEN 453\_AY110109

cgtcgtgagcaagaaggccctcgacatcggcgatgaccccgagcgcctcccagggggccagaccatcagtgtcggcggca  
aggacgatgtgtccgcagtgagaagtctgcctgctgttcgtcttagcttgggaaggggtaggacatgtacttgggttgg  
ttggttacttgtgagtagagagcgcaggacgtta-

tttgcagtcatggtccttgagctgtattcatgtgttaccagctgtctcgttgatTTTTGCCATTTGATACATTTAATTCA  
ttcaggaattcagcctgcggggatagcttagggacat

>Cristalino Norteno\_CHI 349\_AY110109

cgctcgtgagcaagaaggccctcgacatcggcgatgaccccgagcgcctcccagggggccagaccatcagtgctggcggca  
aggacgatgtgtccgcagtgagaagtctgcctgctgttcgctcttagcttggaagggggtaggacatgtacttgggttgg  
ttggttacttgtgcagtagagagcgcaggacgtta-  
tttgagtcagtggtccttgagctgtattcatgtgttaccagctgtctcgttgatTTTTGCCATTTGATACATTTAATTCA  
ttcaggaattcagcctgCGGGTATAGCTTAGGGACAT

>Dzit Bacal\_GUA 131\_AY110109

cgctcgtgagcaagaaggccctcgacatcggcgatgaccccgagcgcctcccagggggccagaccatcagtgctggcggca  
aggacgatgtgtccgcagtgagaagtctgcctgctgttcgctcttagcttggaagggggtaggacatgtacttgggttgg  
ttggttacttgtgcagtagagagcgcaggacgtta-  
tttgagtcagtggtccttgagctgtattcatgtgttaccagctgtctcgttgatTTTTGCCATTTGATACATTTAATTCA  
ttcaggaattcagcctgCGGGTATAGCTTAGGGACAT

>Jalisco\_Benz 967\_AY110109

cgctcgtgagcaagaaggccctcgacatcggcgatgaccccgagcgcctcccagggggccagaccatcagtgctggcggca  
aggacgatgtgtccgcagtgagaagtccgcctgctgttcgctcttagcttggaagggggtaggacatgtacttgggttgg  
ttggttacttgtgcagtagagagcgcaggacgtta-  
tttgagtcagtggtccttgagctgtattcatgtgttaccagctgtctcgttgatTTTTGCCATTTGATACATTTAATTCA  
ttcaggaattcagcctgCGGGTATAGCTTAGGGACAT

>Balsas\_Beadle & Kato Site 4\_AY110109

cgctcgtgagcaagaaggccctcgacatcggcgatgaccccgagcgcctcccagggggccagaccatcagtgctggcggca  
aggacgatgtgtccgcggggaagaagtctgcctgctgttcgctcttagcttggaaggg--  
taggacatgtacttgggttgggttgggttacttgtgcagtagagagcgcaggacgtta-  
tttgagtcagtggtccttgagctgtattcatgtgttaccagctgtctcgttgatTTTTGCCATTTGATACATTTAATTCA  
ttcaggaattcagcctgctGGTATAGCTTAGGGACAT

>Balsas\_Kato Site 4\_AY110109

cgctcgtgagcaagaaggccctcgacatcggcgatgaccccgagcgcctcccagggggccagaccatcagtgctggcggca  
aggacgatgtgtccgcagtgagaagtctgcctgctgttcgctcttagcttggaagggggtaggacatgtacttgggttgg  
ttggttacttgtgcagtagagagcgcaggacgtta-  
tttgagtcagtggtccttgagctgtattcatgtgttaccagctgtctcgttgatTTTTGCCATTTGATACATTTAATTCA  
ttcaggaattcagcctgCGGGTATAGCTTAGGGACAT

>Balsas\_Wilkes Site 6\_AY110109

cgctcgtgagcaagaaggccctcgacatcggcgatgaccccgagcgcctcccagggggccagaccatcagtgctggcggca  
aggacgatgtgtccgcagtgagaagtctgcctgctgttcgctcttagcttggaagggggtaggacatgtacttgggttgg  
ttggttacttgtgcagtagagagcgcaggacgtta-  
tttgagtcagtggtccttgagctgtattcatgtgttaccagctgtctcgttgatTTTTGCCATTTGATACATTTAATTCA  
ttcaggaattcagcctgCGGGTATAGCTTAGGGACAT

>Balsas\_INIFAP JSP y Lo5130\_AY110109

cgctcgtgagcaagaaggccctcgacatcggcgatgaccccgagcgcctcccagggggccagaccatcagtgctggcggca  
aggacgatgtgtccgcagtgagaagtctgcctgctgttcgctcttagcttggaagggggtaggacatgtacttgggttgg  
ttggttacttgtgcagtagagagcgcaggacgtta-  
tttgagtcagtggtccttgagctgtattcatgtgttaccagctgtctcgttgatTTTTGCCATTTGATACATTTAATTCA  
ttcaggaattcagcctgCGGGTATAGCTTAGGGACAT

>Balsas\_INIFAP JSG y LOS 119\_AY110109

cgctcgtgagcaagaaggccctcgacatcggcgatgaccccgagcgcctcccagggggccagaccatcagtgctggcggca  
aggacgatgtgtccgcagtgagaagtctgcctgctgttcgctcttagcttggaagggggtaggacatgtacttgggttgg  
ttggttacttgtgcagtagagagcgcaggacgtta-  
tttgagtcagtggtccttgagctgtattcatgtgttaccagctgtctcgttgatTTTTGCCATTTGATACATTTAATTCA  
ttcaggaattcagcctgCGGGTATAGCTTAGGGACAT

>Jalisco\_INIFAP JSG y MAS 401\_AY110109

cgctcgtgagcaagaaggccctcgacatcggcgatgaccccgagcgcctcccagggggccagaccatcagtgctggcggca  
aggacgatgtgtccgcagtgagaagtccgcctgctgttcgctcttagcttggaagggggtaggacatgtacttgggttgg  
ttggttacttgtgcagtagagagcgcaggacgtta-  
tttgagtcagtggtccttgagctgtattcatgtgttaccagctgtctcgttgatTTTTGCCATTTGATACATTTAATTCA  
ttcaggaattcagcctgCGGGTATAGCTTAGGGACAT

>Balsas\_CIMMYT 8783\_AY110109

cgctcgtgagcaagaaggccctcgacatcggcgatgaccccgagcgcctcccagggggccagaccatcagtgctggcggca  
aggacgatgtgtccgcggggaagaagtctgcctgctgttcgctcttagcttggaagggggtaggacatgtacttgggttgg

ttggttacttgtgtagagagcgcaggacgtta-  
tttgcagtcattggtccttgagctgtattcatgtgttaccagctgtctcgttgatttttgccatttgatacatttaattca  
ttcaggaattcagcctactggtatagcttagggacat  
>Oaxaca\_INIFAP JSG 197\_AY110109  
cgtcgtgagcaagaaggccctcgacatcggcgacgaccccgagcgcctcccagggggccagaccatcagtgtcggcggca  
aggacgatgtgtccgcgggtgaagaagtctgcctgctgttcgtcttagcttggaatggggtaggacatgtacttgggttgg  
ttggttacttgtgtagagagcgcaggacgtta-  
tttgcagtcattggtccttgagctgtattcatgtgttaccagctgtctcgttgatttttgccatttgatacatttaattca  
ttcaggaattcagcctactggtatagcttagggacat  
>Balsas\_INIFAP JSG y LOS 109\_AY110109  
cgtcgtgagcaagaaggccctcgacatcggcgatgaccccgagcgcctcccagggggccagaccatcagtgtcggcggca  
aggacgatgtgtccgcagtgagaagtctgcctgctgttcgtcttagcttggaagggggtaggacatgtacttgggttgg  
ttggttacttgtgtagagagcgcaggacgtta-  
tttgcagtcattggtccttgagctgtattcatgtgttaccagctgtctcgttgatttttgccatttgatacatttaattca  
ttcaggaattcagcctgcggtatagcttagggacat  
>Balsas\_INIFAP JSG 378\_AY110109  
cgtcgtgagcaagaaggccctcgacatcggcgatgaccccgagcgcctcccagggggccagaccatcagtgtcggcggca  
aggacgatgtgtccgcagtgagaagtctgcctgctgttcgtcttagcttggaagggggtaggacatgtacttgggttgg  
ttggttacttgtgtagagagcgcaggacgtta-  
tttgcagtcattggtccttgagctgtattcatgtgttaccagctgtctcgttgatttttgccatttgatacatttaattca  
ttcaggaattcagcctgcggtatagcttagggacat  
>Balsas\_INIFAP JSG 374\_AY110109  
cgtcgtgagcaagaaggccctcgacatcggcgacgaccccgagcgcctcccagggggccagaccatcagtgttggcggca  
aggatgatgtgtccgcgggtgaagaagtctgcctgctgttcgtcttagcttggaagggggtaggacatgtacttgggttgg  
ttggttacttgtgtagagagcgcaggacgtta-tt-----  
accagctgtctcgttgatttttgccatttgatacatttaattcattcaggaattcagcctgctggtatagcttagggaca  
t  
>Balsas\_INIFAP JSG y LOS 161\_AY110109  
cgtcgtgagcaagaaggccctcgacatcggcgatgaccccgagcgcctcccagggggccagaccatcagtgtcggcggca  
aggacgatgtgtccgcagtgagaagtctgcctgctgttcgtcttagcttggaagggggtaggacatgtacttgggttgg  
ttggttacttgtgtagagagcgcaggacgtta-  
tttgcagtcattggtccttgagctgtattcatgtgttaccagctgtctcgttgatttttgccatttgatacattt---  
tcattcaggaattcagcctgcggtatagcttagggacat  
>Balsas\_CIMMYT 11355\_AY110109  
cgtcgtgagcaagaaggccctcgacatcggcgacgaccccgagcgcctcccagggggccagaccatcagtgtcggcggca  
aggacgatgtgtccgcgggtgaagaagtctgcctgctgttcgtcttagcttggaagggggtaggacatgtacttgggttgg  
ttggttacttgtgtagagagcgcaggacgtta-  
tttgcagtcattggtccttgagctgtattcatgtgttaccagctgtctcgttgatttttgccatttgatacatttaattca  
ttcaggaattcagcctgctggtatagcttagggacat  
>Balsas\_USDA PI566686\_AY110109  
cgtcgtgagcaagaaggccctcgacatcggcgacgaccccgagcgcctcccagggggccagaccatcagtgttggcagca  
aggatgatgtgtccgcgggtgaagaagtctgcctgctgttcgtcttagcttggaagggggtaggacatgtacttgggttgg  
ttggttacttgtgtagagagcgcaggacgtta-  
tttgcagtcattggtccttgagctgtattcatgtgttaccagctgtctcgttgatttttgccatttgatacatttaattca  
ttcaggaattcagcctgctggtatagcttagggacat  
>Jalisco\_INIFAP JSG y MAS 264\_AY110109  
cgtcgtgagcaagaaggccctcgacatcggcgatgaccccgagcgcctcccagggggccagaccatcagtgtcggcggca  
aggacgatgtgtccgcagtgagaagtctgcctgctgttcgtcttagcttggaagggggtaggacatgtacttgggttgg  
ttggttacttgtgtagagagcgcaggacgtta-  
tttgcagtcattggtccttgagctgtattcatgtgttaccagctgtctcgttgatttttgccatttgatacatttaattca  
ttcaggaattcagcctgcggtatagcttagggacat  
>Tripsacum\_WW-2120\_AY110109  
cgtcgtgagcaagaaggccctcgacatcggcgacgaccccgagcgcctcccagggggccagaccatcagtgtcggcggca  
aggacgacgtgtctacgggtgaagaagtctgcctgctgttcgtcttagcttggaaggg--  
taggacatgtacttgggttgggttgggttacttgtgtagagagcgcaggacgtcactttgcagtcattggtccttgagct  
gtattcatgtgttaccaggtgcctcgttgatttt-gccatttgatacatt-  
gattcattcaggaattcagcctgctggtatagcttagggacat



>B73\_AY10682

atgacgagcccaggtagtaggagttggatttaaaggtaagtaaactacaccctatacgcaatgggtacaaaaaaaa--  
taaagtattgacaacttatattccagtaacatctcctataactccccccatcaagaactggcagaaatatacatccaggc  
agaggggtcagtagcagatgactcctatatcagtgtcggaaggatgccgatcttcttgatgacatggaacctgacctga  
tgtgatcagcgcacagcaaatttatggatctcaacatcctcag

>Oh43\_AY106826

atgacgagcccaggtagtaggagttggatttaaaggtaagtaaactacaccctatacgcaatgggtacaaaaaaaa--  
taaagtattgacaacttatattccagtaacatctcctataactccccccatcaagaactggcagaaatatacatccaggc  
agaggggtcagtagcagatgactcctatatcagtgtcggaaggatgccgatcttcttgatgacatggaacctgacctga  
tgtgatcagcgcacagcaaatttatggatctcaacatcctcag

>IL14H\_AY106826

--gacgagcccaggtagtaggagttggatttaaaggtaagtaaactacaccctatacgcaatgggtacaaaaaaaa--  
taaagtattgacaacttatattccagtaacatctcctataactccccccatcaagaactggcagaaatatacatccaggc  
agaggggtcagtagcagatgactcctatatcagtgtcggaaggatgccgatcttcttgatgacatggaacctgacctga  
tgtgatcagcgcacagcaaatttatggatctcaacatcctcag

>Mo17\_AY106826

atgacgagcccaggtagtaggagttggatttaaaggtaagtaaactacaccctatacgcaatgggtacaaaaaaaa--  
taaagtattgacaacttatattccagtaacatctcctataactccccccatcaagaactggcagaaatatacatccaggc  
agaggggtcagtagcagatgactcctatatcagtgtcggaaggatgccgatcttcttgatgacatggaacctgacctga  
tgtgatcagcgcacagcaaatttatggatctcaacatcctcag

>Ky21\_AY106826

atgacgagcccaggtagtaggagttggatttaaaggtaagtaaactacaccctatacgcaatgggtacaaaaaaaa--  
taaagtattgacaacttatattccagtaacatctcctataactccccccatcaagaactggcagaaatatacatccaggc  
agaggggtcagtagcagatgactcctatatcagtgtcggaaggatgccgatcttcttgatgacatggaacctgacctga  
tgtgatcagcgcacagcaaatttatggatctcaacatcctcag

>M37W\_AY106826

---acgagcccaggtagtaggagttggatttaaaggtaagtaaactacaccctatacgcaatgggtacaaaaaaaa--  
taaagtattgacaacttatattccagtaacatctcctataactccccccatcaagaactggcagaaatatacatccaggc  
agaggggtcagtagcagatgactcctatatcagtgtcggaaggatgccgatcttcttgatgacatggaacctgacctga  
tgtgatcagcgcacagcaaatttatggatctcaac-----

>HP301\_AY106826

-tgacgagcccaggtagtaggagttggatttaaaggtaagtaaactacaccctatacgcaatgggtacaaaaaaaa--  
taaagtattgacaacttatattccagtaacatctcctataactccccccatcaagaactggcagaaatatacatccaggc  
agaggggtcagtagcagatgactcctatatcagtgtcggaaggatgccgatcttcttgatgacatggaacctgacctga  
tgtgatcagcgcacagcaaatttatggatctcaac-----

>CML247\_AY106826

--gacgagcccaggtagtaggagttggatttaaaggtaagtaaactacaccctatacgcaatgggtacaaaaaaaa--  
taaagtattgacaacttatattccagtaacatctcctataactccccccatcaagaactggcagaaatatacatccaggc  
agaggggtcagtagcagatgactcctatatcagtgtcggaaggatgccgatcttcttgatgacatggaacctgacctga  
tgtgatcagcgcacagcaaatttatggatctcaac-----

>NC350\_AY106826

----cgagcccaggtagtaggagttggatttaaaggtaagtaaactacaccctatacgcaatgggtacaaaaaaaa--  
taaagtattgacaacttatattccagtaacatctcctataactccccccatcaagaactggcagaaatatacatccaggc  
agaggggtcagtagcagatgactcctatatcagtgtcggaaggatgccgatcttcttgatgacatggaacctgacctga  
tgtgatcagcgcacagcaaatttatggatctcaacatcctcag

>Ki3\_AY106826

----cgagcccaggtagtaggagttggatttaaaggtaagtaaactacaccctatacgcaatgggtacaaaaaaaa--  
taaagtattgacaacttatattccagtaacatctcctataactccccccatcaagaactggcagaaatatacatccaggc  
agaggggtcagtagcagatgactcctatatcagtgtcggaaggatgccgatcttcttgatgacatggaacctgacctga  
tgtgatcagcgcacagcaaatttatggatctcaacatcctcag

>Ki11\_AY106826

--gacgagcccaggtagtaggagttggatttaaaggtaagtaaactacaccctatacgcaatgggtacaaaaaaaa--  
taaagtattgacaacttatattccagtaacatctcctataactccccccatcaagaactggcagaaatatacatccaggc  
agaggggtcagtagcagatgactcctatatcagtgtcggaaggatgccgatcttcttgatgacatggaacctgacctga

tgtgatcagcgcacagcaaatttatggatctcaacatcctcag  
>CML333\_AY106826  
atgacgagcccaggtagtaggagttggtattaaaggtaagtaaactacaccctatacgcaatggtacaaaaaaaa--  
taaagtattgacaacttatattccagtaacatctcctataactccccccatcaagaactggcagaaatatacatccaggc  
agaggggtcagtagcagatgactcctatatcagtgtcggaaggatgccgatcttcttgatgacatggaacctgacctga  
tgtgatcagcgcacagcaaatttatggatctcaa-----  
>CML322\_AY106826  
--gacgagcccaggtagtaggagttggtattaaaggtaagtaaactacaccctatacgcaatggtacaaaaaaaa--  
taaagtattgacaacttatattccagtaacatctcctataactccccccatcaagaactggcagaaatatacatccaggc  
agaggggtcagtagcagatgactcctatatcagtgtcggaaggatgccgatcttcttgatgacatggaacctgacctga  
tgtgatcagcgcacagcaaatttatggatctcaac-----  
>CML69\_AY106826  
----cgagcccaggtagtaggagttggtattaaaggtaagtaaactacaccctatacgcaatggtacaaaaaaaa--  
taaagtattgacaacttatattccagtaacatctcctataactccccccatcaagaactggcagaaatatacatccaggc  
agaggggtcagtagcagatgactcctatatcagtgtcggaaggatgccgatcttcttgatgacatggaacctgacctga  
tgtgatcagcgcacagcaaatttatggatctcaac-----  
>Gordo\_CHH 160\_AY106826  
atgacgagcccaggtagtaggagttggtattaaaggtaagtaaactacaccctatacgcaatggtacaaaaaaaa--  
taaagtattgacaacttatattccagtaacatctcctataactccccccatcaagaactggcagaaatatacatccaggc  
agaggggtcagtagcagatgactcctatatcagtgtcggaaggatgccgatcttcttgatgacatggaacctgacctga  
tgtgatcagcgcacagcaaatttatggatctcaacatcctcag  
>Guirua\_MAG 450\_AY106826  
atgacgagcccaggtagtaggagttggtattaaaggtaagtaaactacaccctatacgcaatggtacaaaaaaaa--  
taaagtattgacaacttatattccagtaacatctcctataactccccccatcaagaactggcagaaatatacatccaggc  
agaggggtcagtagcagatgactcctatatcagtgtcggaaggatgccgatcttcttgatgacatggaacctgacctga  
tgtgatcagcgcacagcaaatttatggatctcaacatcctcag  
>Nal-tel\_YUC 7\_AY106826  
atgacgagcccaggtagtaggagttggtattaaaggtaagtaaactacaccctatacgcaatggtacaaaaaaaa--  
taaagtattgacaacttatattccagtaacatctcctataactccccccatcaagaactggcagaaatatacatccaggc  
agaggggtcagtagcagatgactcctatatcagtgtcggaaggatgccgatcttcttgatgacatggaacctgacctga  
tgtgatcagcgcacagcaaatttatggatctcaacatcctcag  
>Pisscotunto\_APC 13\_AY106826  
atgacgagcccaggtagtaggagttggtattaaaggtaagtaaactacaccctatacgcaatggtacaaaaaaaa--  
taaagtattgacaacttatattccagtaacatctcctataactccccccatcaagaactggcagaaatatacatccaggc  
agaggggtcagtagcagatgactcctatatcagtgtcggaaggatgccgatcttcttgatgacatggaacctgacctga  
tgtgatcagcgcacagcaaatttatggatctcaacatcctcag  
>Sabanero\_SAN 329\_AY106826  
atgacgagcccaggtagtaggggttgggtattaaaggtaagtaaactacaccctatacgcaatggtacaaaaaaaa---  
taaagtattgacaacttatattccagtaacatctcctatagctccccccatcaagaactggcagaaatatacatccaggc  
agaggggtcagtagcagatgactcctatatcagtgtcggaaggatgccgatcttcttgatgacatggaacctgacctga  
tgtgatcagcgcacagcaaatttatggatctcaacatcctcag  
>Serrano\_GUA 14\_AY106826  
atgacgagcccaggtagtaggagttggtattaaaggtaagtaaactacaccctatacgcaatggtacaaaaaaaa--  
taaagtattgacaacttatattccagtaacatctcctataactccccccatcaagaactggcagaaatatacatccaggc  
agaggggtcagtagcagatgactcctatatcagtgtcggaaggatgccgatcttcttgatgacatggaacctgacctga  
tgtgatcagcgcacagcaaatttatggatctcaacatcctcag  
>Zapalote\_Chico\_OAX 70\_AY106826  
atgacgagcccaggtagtaggagttggtattaaaggtaagtaaactacaccctatacgcaatggtacaaaaaaaa--  
taaagtattgacaacttatattccagtaacatctcctataactccccccatcaagaactggcagaaatatacatccaggc  
agaggggtcagtagcagatgactcctatatcagtgtcggaaggatgccgatcttcttgatgacatggaacctgacctga  
tgtgatcagcgcacagcaaatttatggatctcaacatcctcag  
>Bolita\_OAX 68\_AY106826  
atgacgagcccaggtagtaggagttggtattaaaggtaagtaaactacaccctatacgcaatggtacaaaaaaaa--  
taaagtattgacaacttatattccagtaacatctcctataactccccccatcaagaactggcagaaatatacatccaggc  
agaggggtcagtagcagatgactcctatatcagtgtcggaaggatgccgatcttcttgatgacatggaacctgacctga  
tgtgatcagcgcacagcaaatttatggatctcaacatcctcag  
>Cateto\_Sulino\_URG 11\_AY106826

atgacgagcccaggtagtaggagttggtattaaaggtaagtaaaactacaccctatacgcaatgggtacaaaaaaaa--  
taaagtattgacaacttatattccagtaacatctcctataactccccccatcaagaactggcagaaatatacatccaggc  
agaggggtcagtagcagatgactcctatatcagtgtcggaaggatgccgatcttcttgatgacatggaacctgacctga  
tgtgatcagcgcatcagcaaatttatggatctcaacatcctcag

>Chalqueno\_MEX 48\_AY106826

atgacgagcccaggtagtaggagttggtattaaaggtaagtaaaactacaccctatacgcaatgggtacaaaaaaaa--  
taaagtattgacaacttatattccagtaacatctcctataactccccccatcaagaactggcagaaatatacatccaggc  
agaggggtcagtagcagatgactcctatatcagtgtcggaaggatgccgatcttcttgatgacatggaacctgacctga  
tgtgatcagcgcatcagcaaatttatggatctcaacatcctcag

>Chapalote\_SIN 2\_AY106826

atgacgagcccaggtagtaggagttggtattaaaggtaagtaaaactacaccctatacgcaatgggtacaaaaaaaa--  
taaagtattgacaacttatattccagtaacatctcctataactccccccatcaagaactggcagaaatatacatccaggc  
agaggggtcagtagcagatgactcctatatcagtgtcggaaggatgccgatcttcttgatgacatggaacctgacctga  
tgtgatcagcgcatcagcaaatttatggatctcaacatcctcag

>Conico\_PUE 32\_AY106826

atgacgagcccaggtagtaggagttggtattaaaggtaagtaaaactacaccctatacgcaatgggtacaaaaaaaa--  
taaagtattgacaacttatattccagtaacatctcctataactccccccatcaagaactggcagaaatatacatccaggc  
agaggggtcagtagcagatgactcctatatcagtgtcggaaggatgccgatcttcttgatgacatggaacctgacctga  
tgtgatcagcgcatcagcaaatttatggatctcaacatcctcag

>Costeno\_VEN 453\_AY106826

atgacgagcccaggtagtaggagttggtattaaaggtaagtaaaactacaccctatacgcaatgggtacaaaaaaaa--  
taaagtattgacaacttatattccagtaacatctcctataactccccccatcaagaactggcagaaatatacatccaggc  
agaggggtcagtagcagatgactcctatatcagtgtcggaaggatgccgatcttcttgatgacatggaacctgacctga  
tgtgatcagcgcatcagcaaatttatggatctcaacatcctcag

>Cristalino Norteno\_CHI 349\_AY106826

atgacgagcccaggtagtaggagttggtattaaaggtaagtaaaactacaccctatacgcaatgggtacaaaaaaaa--  
taaagtattgacaacttatattccagtaacatctcctataactccccccatcaagaactggcagaaatatacatccaggc  
agaggggtcagtagcagatgactcctatatcagtgtcggaaggatgccgatcttcttgatgacatggaacctgacctga  
tgtgatcagcgcatcagcaaatttatggatctcaacatcctcag

>Dzit Bacal\_GUA 131\_AY106826

atgacgagcccaggtagtaggagttggtattaaaggtaagtaaaactacaccctatacgcaatgggtacaaaaaaaa--  
taaagtattgacaacttatattccagtaacatctcctataactccccccatcaagaactggcagaaatatacatccaggc  
agaggggtcagtagcagatgactcctatatcagtgtcggaaggatgccgatcttcttgatgacatggaacctgacctga  
tgtgatcagcgcatcagcaaatttatggatctcaacatcctcag

>Jalisco\_Benz 967\_AY106826

atgacgagcccaggtagtaggagttggtattaaaggtaagtaaaactacaccctatacgcaatgggtacaaaaaaaa--  
taaagtattgacaacttatattccagtaacatctcctataactccccccatcaagaactggcagaaatatacatccaggc  
agaggggtcagtagcagatgactcctatatcagtgtcggaaggatgccgatcttcttgatgacatggaacctgacctga  
tgtgatcagcgcatcagcaaatttatggatctcaacatcctcag

>Balsas\_Beadle & Kato Site 4\_AY106826

atgacgagcccaggtagtaggggttgggtattaaaggtaagtaaaactacaccctatacgcaatgggtacaaaaaaaa---  
taaagtattgacaacttatattccagtaacatctcctataactccccccatcaagaactggcagaaatatacatccaggc  
agaggggtcagtagcagatgactcctatatcagtgtcggaaggatgccgatcttcttgatgacatggaacctgacctga  
tgtgatcagcgcatcagcaaatttatggatctcaacatcctcag

>Balsas\_Kato Site 4\_AY106826

atgacgagcccaggtagtaggagttggtattaaaggtaagtaaaactacaccctatacgcaatgggtacaaaaaaaa--  
taaagtattgacaacttatattccagtaacatctcctataactccccccatcaagaactggcagaaatatacatccaggc  
agaggggtcagtagcagatgactcctatatcagtgtcggaaggatgccgatcttcttgatgacatggaacctgacctga  
tgtgatcagcgcatcagcaaatttatggatctcaacatcctcag

>Balsas\_Wilkes Site 6\_AY106826

atgacgagcccaggtagtaggagttggtattaaaggtaagtaaaactacaccctatacgcaatgggtacaaaaaaaa--  
taaagtattgacaacttatattccagtaacatctcctataactccccccatcaagaactggcagaaatatacatccaggc  
agaggggtcagtagcagatgactcctatatcagtgtcggaaggatgccgatcttcttgatgacatggaacctgacctga  
tgtgatcagcgcatcagcaaatttatggatctcaacatcctcag

>Balsas\_INIFAP JSP y Lo5130\_AY106826

atgacgagcccaggtagtaggagttggtattaaaggtaagtaaaactacaccctatacgcaatgggtacaaaaaaaa--  
taaagtattgacaacttatattccagtaacatctcctataactccccccatcaagaactggcagaaatatacatccaggc

agaggggtcagtagcagatgactcctatatcagtggtcggaaggatgccgatcttcttgatgacatggaacctgacctga  
tgtgatcagcgcatcagcaaatttatggatctcaacatcctcag  
>Balsas\_INIFAP JSG y LOS 119\_AY106826  
atgacgagcccaggtagtaggagttggtattaaaggtaagtaaactacaccctatacgcgaatggtacaaaaaaaa--  
taaagtattgacaacttatattccagtaacatctcctataactccccccatcaagaactggcagaaatatacatccagggc  
agaggggtcagtagcagatgactcctatatcagtggtcggaaggatgccgatcttcttgatgacatggaacctgacctga  
tgtgatcagcgcatcagcaaatttatggatctcaacatcctcag  
>Jalisco\_INIFAP JSG y MAS 401\_AY106826  
atgacgagcccaggtagtaggagttggtattaaaggtaagtaaactacaccctatacgcgaatggtacaaaaaaaa--  
taaagtattgacaacttatattccagtaacatctcctataactccccccatcaagaactggcagaaatatacatccagggc  
agaggggtcagtagcagatgactcctatatcagtggtcggaaggatgccgatcttcttgatgacatggaacctgacctga  
tgtgatcagcgcatcagcaaatttatggatctcaacatcctcag  
>Balsas\_CIMMYT 8783\_AY106826  
atgacgagcccaggtagtaggagttggtattaaaggtaagtaaactacaccctatacgcgaatggtacaaaaaaaa--  
taaagtattgacaacttatattccagtaacatctcctataactccccccatcaagaactggcagaaatatacatccagggc  
agaggggtcagtagcagatgactcctatatcagtggtcggaaggatgccgatcttcttgatgacatggaacctgacctga  
tgtgatcagcgcatcagcaaatttatggatctcaacatcctcag  
>Oaxaca\_INIFAP JSG 197\_AY106826  
atgacgagcccaggtagtaggagttggtattaaaggtaagtaaactacaccctatacgcgaatggtacaaaaaaaa--  
taaagtattgacaacttatattccagtaacatctcctataactccccccatcaagaactggcagaaatatacatccagggc  
agaggggtcagtagcagatgactcctatatcagtggtcggaaggatgccgatcttcttgatgacatggaacctgacctga  
tgtgatcagcgcatcagcaaatttatggatctcaacatcctcag  
>Balsas\_INIFAP JSG y LOS 109\_AY106826  
atgacgagcccaggtagtaggagttggtattaaaggtaagtaaactacaccctatacgcgaatggtacaaaaaaaa--  
taaagtattgacaacttatattccagtaacatctcctataactccccccatcaagaactggcagaaatatacatccagggc  
agaggggtcagtagcagatgactcctatatcagtggtcggaaggatgccgatcttcttgatgacatggaacctgacctga  
tgtgatcagcgcatcagcaaatttatggatctcaacatcctcag  
>Balsas\_INIFAP JSG 378\_AY106826  
atgacgagcccaggtagtaggagttggtattaaaggtaagtaaactacaccctatacgcgaatggtacaaaaaaaa--  
taaagtattgacaacttatattccagtaacatctcctataactccccccatcaagaactggcagaaatatacatccagggc  
agaggggtcagtagcagatgactcctatatcagtggtcggaaggatgccgatcttcttgatgacatggaacctgacctga  
tgtgatcagcgcatcagcaaatttatggatctcaacatcctcag  
>Balsas\_INIFAP JSG 374\_AY106826  
atgacgagcccaggtagtaggggttgggtattaaaggtaagtaaactacaccctatacgcgaatggtacaaaaaaaaataaa  
gtattgacaacttatattccagtaacatctcctataactccccccatcaagaactggcagaaatatacatccagggcagag  
gggtcagtagcagatgactcctatatcagtggtcggaaggatgccgatcttcttgatgacatggaacctgaccttgatggt  
atcagcgcatcagcaaatttatggatctcaacatcctcag  
>Balsas\_INIFAP JSG y LOS 161\_AY106826  
atgacgagcccaggtagtaggagttggtattaaaggtaagtaaactacaccctatacgcgaatggtacaaaaaaaa--  
taaagtattgacaacttatattccagtaacatctcctataactccccccatcaagaactggcagaaatatacatccagggc  
agaggggtcagtagcagatgactcctatatcagtggtcggaaggatgccgatcttcttgatgacatggaacctgacctga  
tgtgatcagcgcatcagcaaatttatggatctcaacatcctcag  
>Balsas\_CIMMYT 11355\_AY106826  
atgacgagcccaggtagtaggagttggtattaaaggtaagtaaactacaccctatacgcgaatggtacaaaaaaaa--  
taaagtattgacaacttatattccagtaacatctcctataactccccccatcaagaactggcagaaatatacatccagggc  
agaggggtcagtagcagatgactcctatatcagtggtcggaaggatgccgatcttcttgatgacatggaacctgacctga  
tgtgatcagcgcatcagcaaatttatggatctcaacatcctcag  
>Balsas\_USDA PI566686\_AY106826  
atgacgagcccaggtagtaggagttggtattaaaggtaagtaaactacaccctatacgcgaatggtacaaaaaaaa---  
taaagtattgacaacttatattccagtaacatctcctatagctccccccatcaagaactggcagaaatatacatccagggc  
agaggggtcagtagcagatgactcctatatcagtggtcggaaggatgccgatcttcttgatgacatggaacctgacctga  
tgtgatcagcgcatcagcaaatttatggatctcaacatcctcag  
>Jalisco\_INIFAP JSG y MAS 264\_AY106826  
atgacgagcccaggtagtaggagttggtattaaaggtaagtaaactacaccctatacgcgaatggtacaaaaaaaa--  
taaagtattgacaacttatattccagtaacatctcctataactccccccatcaagaactggcagaaatatacatccagggc  
agaggggtcagtagcagatgactcctatatcagtggtcggaaggatgccgatcttcttgatgacatggaacctgacctga  
tgtgatcagcgcatcagcaaatttatggatctcaacatcctcag

>Tripsacum\_WW-2120\_AY106826

atgacgagcccaggtagtaggggttggtattaaaggtaagtaaactacaccctatacgcgattgtacaaaaa---  
taaaatattgagaacttatattccagtaacatctcctataaacttcccc-  
atcaagaactggcagaaatatacatccaggcagaggggtcagtagcagatgagtcctatatcagtggtcggaaggatgccg  
atcttcttgatgacatggaacctgaccttgatgtgatcagcgcacagcaaatttatggatctcaacatcctcag

>B73\_AY109101

gccacatcccgcagttcgtcctcatattgatgatatacataattcatggtgataaacttgtcatgaagtactctaattaac  
cgctacaccaagccgcttctccaccagaaaaagaatcattattat--gt----  
aagtctacacgattcattagcaaaatgtgatatgtatggttccttgatagctattactgtattaaacgagaaaa-  
ggacattctgctgtagtctt----  
caaccattcgtggactcgccattggtcatgagatggttatctatagatggttttttt--gtatgccga

>Oh43\_AY109101

-----

atcccgcagttcgtcctcatattgatgatatacataattcatggtgataaacttgtcatgaagtactctaattaaccgcta  
caccaagccgcttctccaccagaaaaagaatcattattat--gt----  
aagtctacacgattcattagcaaaatgtgatatgtatggttccttgatagctattactgtattaaacgagaaaa-  
ggacattctgctgtagtctt----  
caaccattcgtggactcgccattggtcatgagatggttatctatagatggttttttt--gtatgcc---

>IL14H\_AY109101

-----

gtcctcatattgatgatatacataattcatggtgataaacttgtcatgaagtactctaattaaccgctacaccaagccgct  
tctccaccagaaaaagaatcattattat--gt----  
aagtctacacgattcattagcaaaatgtgatatgtatggttccttgatagctattactgtattaaacgagaaaa-  
ggacattctgctgtagtctt----  
caaccattcgtggactcgccattggtcatgagatggttatctatagatggttttttt--gtatgccga

>Mo17\_AY109101

gccacatcccgcagttcgtcctcatattgatgatatacataattcatggtgataaacttgtcatgaagtactctaattaac  
cgctacaccaagccgcttctccaccagaaaaagaatcattattat--gt----  
aagtctacacgattcattagcaaaatgtgatatgtatggttccttgatagctattactgtattaaacgagaaaa-  
ggacattctgctgtagtctt----  
caaccattcgtggactcgccattggtcatgagatggttatctatagatggttttttt--gtatgccga

>Ky21\_AY109101

gccacatcccgcagttcgtcctcatattgatgatatacataattcatggtgataaacttgtcatgaagtactctaattaac  
cgctacaccaagccgcttctccaccagaaaaagaatcattattat--gt----  
aagtctacacgattcattagcaaaatgtgatatgtatggttccttgatagctattactgtattaaacgagaaaa-  
ggacattctgctgtagtctt----  
caaccattcgtggactcgccattggtcatgagatggttatctatagatggttttttt--g-----

>M37W\_AY109101

-----

atcccgcagttcgtcctcatattgatgatatacataattcatggtgataaacttgtcatgaagtactctaattaaccgcta  
caccaagccgcttctccaccagaaaaagaatcattattat--gt----  
aagtctacacgattcattagcaaaatgtgatatgtatggttccttgatagctattactgtattaaacgagaaaa-  
ggacattctgctgtagtctt----  
caaccattcgtggactcgccattggtcatgagatggttatctatagatggttttttt--gtatgcc---

>HP301\_AY109101

--

cacatcccgcagttcgtcctcatattgatgatatacataattcatggtgataaacttgtcatgaagtactctaattaaccg  
ctacaccaagccgcttctccaccagaaaaagaatcattattat--gt----  
aagtctacacgattcattagcaaaatgtgatatgtatggttccttgatagctattactgtattaaacgagaaaa-  
ggacattctgctgtagtctt----  
caaccattcgtggactcgccattggtcatgagatggttatctatagatggttttttt--g-----

>CML247\_AY109101

-----

atcccgcagttcgtcctcatattgatgatatacataattcatggtgataaacttgtcatgaagtactctaattaaccgcta

caccaagccgcttctccaccagaaaaagaatcattattat--gt----  
aagtctacacgattcattagcaaaatgtgatatgtatgttccttgatagctattactgtattaaacgagaaaa-  
ggacattctgctgtagtctt----  
caaccattcgtggactcgccattggttcatgagatggttatctatagatgtttttttt--gtatgccga  
>NC350\_AY109101  
-----  
atcccgcagttcgtcctcatattgatgatataataatcatggtgataaacttgtcatgaagtactctaattaaccgcta  
caccaagccgcttctccaccagaaaaagaatcattattat--gt----  
aagtctacacgattcattagcaaaatgtgatatgtatgttccttgatagctattactgtattaaacgagaaaa-  
ggacattctgctgtagtctt----  
caaccattcgtggactcgccattggttcatgagatggttatctatagatgtttttttt--gtatgcc---  
>Ki3\_AY109101  
gccacatcccgcagttcgtcctcatattgatgatataataatcatggtgataaacttgtcatgaagtactctaattaac  
cgctacaccaagccgcttctccaccagaaaaagaatcattattat--gt----  
aagtctacacgattcattagcaaaatgtgatatgtatgttccttgatagctattactgtattaaacgagaaaa-  
ggacattctgctgtagtctt----  
caaccattcgtggactcgccattggttcatgagatggttatctatagatgtttttttt-----  
>Ki11\_AY109101  
gccacatcccgcagttcgtcctcatattgatgatataataatcatggtgataaacttgtcatgaagtactctaattaac  
cgctacaccaagccgcttctccaccagaaaaagaatcattattat--gt----  
aagtctacacgattcattagcaaaatgtgatatgtatgttccttgatagctattactgtattaaacgagaaaa-  
ggacattctgctgtagtctt----  
caaccattcgtggactcgccattggttcatgagatggttatctatagatgtttttttt--gta-----  
>CML333\_AY109101  
gccacatcccgcagttcgtcctcatattgatgatataataatcatggtgataaacttgtcatgaagtactctaattaac  
cgctacaccaagccgcttctccaccagaaaaagaatcattattat--gt----  
aagtctacacgattcattagcaaaatgtgatatgtatgttccttgatagctattactgtattaaacgagaaaa-  
ggacattctgctgtagtctt----  
caaccattcgtggactcgccattggttcatgagatggttatctatagatgtttttttt--g-----  
>CML322\_AY109101  
gccacatcccgcagttcgtcctcatattgatgatataataatcatggtgataaacttgtcatgaagtactctaattaac  
cgctacaccaagccgcttctccaccagaaaaagaatcattattat--gt----  
aagtctacacgattcattagcaaaatgtgatatgtatgttccttgatagctattactgtattaaacgagaaaa-  
ggacattctgctgtagtctt----  
caaccattcgtggactcgccattggttcatgagatggttatctatagatgtttttttt-----  
>CML69\_AY109101  
-----  
atcccgcagttcgtcctcatattgatgatataataatcatggtgataaacttgtcatgaagtactctaattaaccgcta  
caccaagccgcttctccaccagaaaaagaatcattattat--gt----  
aagtctacacgattcattagcaaaatgtgatatgtatgttccttgatagctattactgtattaaacgagaaaa-  
ggacattctgctgtagtctt----  
caaccattcgtggactcgccattggttcatgagatggttatctatagatgtttttttt-----  
>Assinboine\_PI213793\_AY109101  
gccacatcccgcagttcgtcctcatattgatgatataataatcatggtgataaacttgtcatgaagtactctaattaac  
cgctacaccaagccgcttctccaccagaaaaagaatcattattat--gt----  
aagtctacacgattcattagcaaaatgtgatatgtatgttccttgatagctattactgtattaaacgagaaaa-  
ggacattctgctgtagtctt----  
caaccattcgtggactcgccattggttcatgagatggttatctatagatgtttttttt--gtatgccga  
>Gordo\_CHH\_160\_AY109101  
gccacatcccgcagttcgtcctcatattgatgatataataatcatggtgataaacttgtcatgaagtactctaattaac  
cgctacaccaagccgcttctccaccagaaaaagaatcattattat--gt----  
aagtctacacgattcattagcaaaatgtgatatgtatgttccttgatagctattactgtattaaacgagaaaa-  
ggacattctgctgtagtctt----  
caaccattcgtggactcgccattggttcatgagatggttatctatagatgtttttttt--gtatgccga  
>Guirua\_MAG\_450\_AY109101  
gccacatcccgcagttcgtcctcatattgatgatataataatcatggtgataaacttgtcatgaagtactctaattaac  
cgctacaccaagccgcttctccaccagaaaaagaatcattattat--gt----

aagtctacacgattcattagcaaaatgtgatatgtatgttccttgatagctattactgtattaaacgagaaaa-  
ggacattctgctgtagtctt----  
caaccattcgtggactcgccattggtcatgagatggttatctatagatggttttttt--gtatgccga  
>Nal-tel\_YUC 7\_AY109101  
gccacatcccgcagttcgtcctcatattgatgatatacataattcatggtgataaacttgatcatgaagtactctaattaac  
cgctacaccaagccgcttctccaccagaaaaagaatcattattat--gt----  
aagtctacacgattcattagcaaaatgtgatatgtatgttccttgatagctattactgtattaaacgagaaaa-  
ggacattctgctgtagtctt----  
caaccattcgtggactcgccattggtcatgagatggttatctatagatggttttttt--gtatgccga  
>Pisscotunto\_APC 13\_AY109101  
gccacatcccgcagttcgtcctcatattgatgatatacataattcatggtgataaacttgatcatgaagtactctaattaac  
cgctacaccaagccgcttctccaccagaaaaagaatcattattat--gt----  
aagtctacacgattcattagcaaaatgtgatatgtatgttccttgatagctattactgtattaaacgagaaaa-  
ggacattctgctgtagtctt----  
caaccattcgtggactcgccattggtcatgagatggttatctatagatggttttttt--gtatgccga  
>Sabanero\_SAN 329\_AY109101  
gccacatcccgcagttcgtcctcatattgatgatatacataattcatggtgataaacttgatcatgaagtactctaattaac  
cgctacaccaagccgcttctccaccagaaaaagaatcattattat--gt----  
aagtctacacgattcattagcaaaatgtgatatgtatgttccttgatagctattactgtattaaacgagaaaa-  
ggacattctgctgtagtctt----  
caaccattcgtggactcgccattggtcatgagatggttatctatagatggttttttt--gtatgccga  
>Serrano\_GUA 14\_AY109101  
gccacatcccgcagttcgtcctcatattgatgatatacataattcatggtgataaacttgatcatgaagtactctaattaac  
cgctacaccaagccgcttctccaccagaaaaaaaaaatcattattat--gt----  
aagtctacacgattcattagcaaaatgtgatatgtatgttccttgatagctattactgtattaaacgagaaaa-  
ggacattctgctgtagtctt----  
caaccattcgtggactcgccattggtcatgagatggttatctatagatggttttttt--gtatgccga  
>Zapalote\_Chico\_OAX 70\_AY109101  
gccacatcccgcagttcgtcctcatattgatgatatacataattcatggtgataaacttgatcatgaagtactctaattaac  
cgctacaccaagccgcttctccaccagaaaaagaatcattattat--gt----  
aagtctacacgattcattagcaaaatgtgatatgtatgttccttgatagctattactgtattaaacgagaaaa-  
ggacattctgctgtagtctt----  
caaccattcgtggactcgccattggtcatgagatggttatctatagatggttttttt--gtatgccga  
>Bolita\_OAX 68\_AY109101  
gccacatcccgcagttcgtcctcatattgatgatatacataattcatggtgataaacttgatgatgaagtactctaattaac  
cgctacaccaagccgcttctccaccagaaaaagaatcattattat--gt----  
aagtctacacgattcattagcaaaatgtgatatgtatgttccttgatagctattactgtattaaacgagaaaa-  
ggacattctgctgtagtctt----  
caaccattcgtggactcgccattggtcatgagatggttatctatagatggttttttt--gtatgccga  
>Cateto\_Sulino\_URG 11\_AY109101  
---  
acatcccgcagttcgtcctcatattgatgatatacataattcatggtgataaacttgatcatgaagtactctaattaaccgc  
tacaccaagccgcttctccaccagaaaaagaatcattattat--gt----  
aagtctacacgattcattagcaaaatgtgatatgtatgttccttgatagctattactgtattaaacgagaaaa-  
ggacattctgctgtagtctt----  
caaccattcgtggactcgccattggtcatgagatggttatctatagatggttttttt--gtatgccga  
>Chalqueno\_MEX 48\_AY109101  
gccacatcccgcagttcgtcctcatattgatgatatacataattcatggtgataaacttgatcatgaagtactctaattaac  
cgctacaccaagccgcttctccaccagaaaaagaatcattattat--gt----  
aagtctacacgattcattagcaaaatgtgatatgtatgttccttgatagctattactgtattaaacgagaaaa-  
ggacattctgctgtagtctt----  
caaccattcgtggactcgccattggtcatgagatggttatctatagatggttttttt--gtatgccga  
>Chapalote\_SIN 2\_AY109101  
gccacatcccgcagttcgtcctcatattgatgatatacataattcatggtgataaacttgatcatgaagtactctaattaac  
cgctacaccaagccgcttctccaccagaaaaagaatcattattat--gt----  
aagtctacacgattcattagcaaaatgtgatatgtatgttccttgatagctattactgtattaaacgagaaaa-  
ggacattctgctgtagtctt----

caaccattcgtggactcgccattggtcatgagatggttatctatagatggttttttt--gtatgccga  
>Conico\_PUE 32\_AY109101  
gccacatcccgcagttcgtcctcatattgatgatatacataattcatggtgataaacttgatcatgaagtactctaattaac  
cgctacaccaagccgcttctccaccagaaaaagaatcattattat--gt----  
aagtctacacgattcattagcaaaatgtgatatgtagtgccttgatagctattactgtattaaacgagaaaa-  
ggacattctgctgtagtcttcttcaaccattcgtggactcgccattggtcatgagatggttatctatagatggtttttt  
t--gtatgccga  
>Costeno\_VEN 453\_AY109101  
gccacatcccgcagttcgtcctcatattgatgatatacataattcatggtgataaacttgatcatgaagtactctaattaac  
cgctacaccaagccgcttctccaccagaaaaagaatcattattat--gt----  
aagtctacacgattcattagcaaaatgtgatatgtagtgccttgatagctattactgtattaaacgagaaaa-  
ggacattctgctgtagtctt----  
caaccattcgtggactcgccattggtcatgagatggttatctatagatggttttttt--gtatgccga  
>Cristalino Norteno\_CHI 349\_AY109101  
gccacatcccgcagttcgtcctcatattgatgatatacataattcatggtgataaacttgatcatgaagtactctaattaac  
cgctacaccaagccgcttctccaccagaaaaagaatcattattat--gt----  
aagtctacacgattcattagcaaaatgtgatatgtagtgccttgatagctattactgtattaaacgagaaaa-  
ggacattctgctgtagtctt----  
caaccattcgtggactcgccattggtcatgagatggttatctatagatggttttttt--gtatgccga  
>Dzit Bacal\_GUA 131\_AY109101  
gccacatcccgcagttcgtcctcatattgatgatatacataattcatggtgataaacttgatcatgaagtactctaattaac  
cgctacaccaagccgcttctccaccagaaaaagaatcattattat--gt----  
aagtctacacgattcattagcaaaatgtgatatgtagtgccttgatagctattactgtattaaacgagaaaa-  
ggacattctgctgtagtctt----  
caaccattcgtggactcgccattggtcatgagatggttatctatagatggttttttt--gtatgccga  
>Jalisco\_Benz 967\_AY109101  
gccacatcccgcagttcgtcctcatattgatgatatacataattcatggtgataaacttgatgatgaagtactctaattaac  
cgctacaccaagccgcttctccaccagaaaaagaatcattattat--gt----  
aagtctacacgattcattagcaaaatgtgatatgtagtgccttgatagctattactgtattaaacgagaaaa-  
ggacattctgctgtagtctt----  
caaccattcgtggactcgccattggtcatgagatggttatctatagatggtttttttt--gtatgccga  
>Balsas\_Beadle & Kato Site 4\_AY109101  
gccacatcccgcagttcgtcctcatattgatgatatacataattcatggtgataaacttgatcatgaagtactctaattaac  
cgctacaccaagccgcttctccaccagaaaaagaatcattattat--gt----  
aagtctacacgattcattagcaaaatgtgatatgtagtgccttgatagctattactgtattaaacgagaaaa-  
ggacattctgctgtagtctt----  
caaccattcgtggactcgccattggtcatgagatggttatctatagatggtttttttt--gtatgccga  
>Balsas\_Wilkes Site 6\_AY109101  
gccacatcccgcagttcgtcctcatattgatgatatacataattcatggtgataaacttgatgatgaagtactctaattaac  
cgctacaccaagccgcttctccaccagaaaaagaatcattattat--gt----  
aagtctacacgattcattagcaaaatgtgatatgtagtgccttgatagctattactgtattaaacgagaaaa-  
ggacattctgctgtagtctt----  
caaccattcgtggactcgccattggtcatgagatggttatctatagatggtttttttt--gtatgccga  
>Balsas\_INIFAP JSG y LOS 119\_AY109101  
gccacatcccgcagttcgtcctcatattgatgatatacataattcatggtgataaacttgatcatgaagtactctaattaac  
cgctacaccaagccgcttctccaccagaaaaagaatcattattat--gt----  
aagtctacacgattcattagcaaaatgtgatatgtagtgccttgatagctattactgtattaaacgagaaaa-  
ggacattctgctgtagtctt----  
caaccattcgtggactcgccattggtcatgagatggttatctatagatggtttttttt--gtatgccga  
>Jalisco\_INIFAP JSG y MAS 401\_AY109101  
gccacatcccgcagttcgtcctcatattgatgatatacataattcatggtgataaacttgatgatgaagtactctaattaac  
cgctacaccaagccgcttctccaccagaaaaagaatcattattat--gt----  
aagtctacacgattcattagcaaaatgtgatatgtagtgccttgatagctattactgtattaaacgagaaaa-  
ggacattctgctgtagtctt----  
caaccattcgtggactcgccattggtcatgagatggttatctatagatggtttttttt--gtatgccga  
>Balsas\_CIMMYT 8783\_AY109101  
gccacatcccgcagttcgtcctcatattgatgatatacataattcatggtgataaacttgatcatgaagtactctaattaac



cgctacaccaagccgcttctccaccagaaaaagaatcattattat--gt----  
aagtctacacgattcattagcaaaaatgtgatatgtatgttccttgatagctattactgtattaaacgagaaaaaggacat  
tctgctgtagtctt----caaccattcgtggactcgccattgttcatgagatgttatctatagatgtttttttt--  
gtatgccga

>Oaxaca\_INIFAP JSG 197\_AY109101

gccacatcccgcagttcgtcctcatattgatgatatacataattcatgttgataaacttgtgatgaagtactctaattaac  
cgctacaccaagccgcttctccaccagaaaaagaatcattattat--gt----  
aagtctacacgattcattagcaaaaatgtgatatgtatgttccttgatagctattactgtattaaacgagaaaa-  
ggacattctgctgtagtctt----  
caaccattcgtggattcgccattgttcatgagatgttatctatagatgtttttttt-gtatgccga

>Balsas\_INIFAP JSG y LOS 109\_AY109101

gccacatcccgcagttcgtcctcatattgatgatatacataattcatgttgataaacttgtgatgaagtactctaattaac  
cgctacaccaagccgcttctccaccagaaaaagaatcattattat--gt----  
aagtctacacgattcattagcaaaaatgtgatatgtatgttccttgatagctattactgtattaaacgagaaaa-  
ggacattctgctgtagtctt----  
caaccattcgtggactcgccattgttcatgagatgttatctatagatgtttttttt-gtatgccga

>Balsas\_INIFAP JSG 378\_AY109101

gccacatcccgcagttcgtcctcatattgatgatatacataattcatgttgataaacttgtgatgaagtactctaattaac  
cgctacaccaagccgcttctccaccagaaaaagaatcattattat--gt----  
aagtctacacgattcattagcaaaaatgtgatatgtatgttccttgatagctattactgtattaaacgagaaaa-  
ggacattctgctgtagtctt----  
caaccattcgtggactcgccattgttcatgagatgttatctatagatgtttttttt-gtatgccga

>Balsas\_INIFAP JSG 374\_AY109101

gccacatcccgcagttcgtcctcatattgatgatatacataattcatgttgataaacttgtgatgaagtactctaattaac  
cgctacaccaagccgcttctccaccagaaaaagaatcattattat--gt----  
aagtctacacgattcattagcaaaaatgtgatatgtatgttccttgatagctattactgtattaaacgagaaaa-  
ggacattctgctgtagtctt----  
caaccattcgtggactcgccattgttcatgagatgttatctatagatgtttttttt-gtatgccga

>Balsas\_CIMMYT 11355\_AY109101

gccacatcccgcagttcgtcctcatattgatgatatacataattcatgttgataaacttgtcatgaagtactctaattaac  
cgctacaccaagccgcttctccaccagaaaaagaatcattattat--gt----  
aagtctacacgattcattagcaaaaatgtgatatgtatgttccttgatagctattactgtattaaacgagaaaa-  
ggacattctgctgtagtctt----  
caaccattcgtggactcgccattgttcatgagatgttatctatagatgtttttttt--gtatgccga

>Balsas\_USDA PI56686\_AY109101

gccacatcccgcagttcgtcctcatattgatgatatacataattcatgttgataaacttgtgatgaagtactctaattaac  
cgctacaccaagccgcttctccaccagaaaaagaatcattattat--gt----  
aagtctacacgattcattagcaaaaatgtgatatgtatgttccttgatagctattactgtattaaacgagaaaa-  
ggacattctgctgtagtctt----  
caaccattcgtggactcgccattgttcatgagatgttatctatagatgtttttttt--gtatgccga

>Jalisco\_INIFAP JSG y MAS 264\_AY109101

gccacatcccgcagttcgtcctcatattgatgatatacataattcatgttgataaacttgtcatgaagtactctaattaac  
cgctacaccaagccgcttctccaccagaaaaagaatcattattat--gt----  
aagtctacacgattcattagcaaaaatgtgatatgtatgttccttgatagctattactgtattaaacgagaaaa-  
ggacattctgctgtagtcttcttcaaccattcgtggactcgccattgttcatgagatgttatctatagatgttttttt  
t--gtatgccga

>Tripsacum\_WW-2120\_AY109101

gccacatcccgcagttcgtcctcatattgatgatatacataattcatgttgataaacttgtcatgaagtactctaattaac  
cgctataccaagccgcttctccaccagaaaa--  
gaattattattgtaagtctacatgtctacagattcattagcaaaaatgtgatatgtatgttccttgatagctattgctgt  
attaaacgagaaaa-  
gaacattctgctgtagtcttcttcaaccattcctggactcgccattgttcatgagatgttatctatagatgttttttt  
t--atatgccga

>B73\_AY105752

----

tatgggccaacgctggcctaacaatcgctccgcttgctgacctagctggtggttgatgtatattttgagttttttatcagctg  
ctaccagcatgagccacaaggcatttgccttgtcgtaacc--  
atggaaattggaaaggggatgaattccgatgtatgtgcccgaacttgattctaggggttggctctcgtaa-  
gttaatcgggaaaggcgggtgcagacactactgatgagccgtaacgtaccgctcagatccccagatacaataaaaacgag  
tctgtaatgtggcttttgcacgcatattttctgcatc  
>Oh43\_AY105752

-----

cgaaccgctggcctaacaatcgctccgcttgctgacctagctggtggttgatgtatattttgagttttttatcagctgctacca  
gcatgagccacaaggcatttgccttgtcgtaacc--  
atggaaattggaaaggggatgaattccgatgtatgtgcccgaacttgattctaggggttggctctcgtaa-  
gttaatcgggaaaggcgggtgcagacactactgatgagccgtaacgtaccgctcagatccccagatacaataaaaacgag  
tctgtaatgtggcttttgcacgcat-----  
>IL14H\_AY105752

-----

atgggccaacgctggcctaacaatcgctccgcttgctgacctagctggtggttgatgtatattttgagttttttatcagctgc  
taccagcatgagccacaaggcatttgccttgtcgtaacc--  
atggaaattggaaaggggatgaattccgatgtatgtgcccgaacttgattctaggggttggctctcgtaa-  
gttaatcgggaaaggcgggtgcagacactactgatgagccgtaacgtaccgctcagatccccagatacaataaaaacgag  
tctgtaatgtggcttttgcacgcatattttctgcatc  
>Mo17\_AY105752

atgctatgggccaacgctggcctaacaatcgctccgcttgctgacctagctggtggttgatgtatattttgagttttttatca  
gctgctaccagcatgagccacaaggcatttgccttgtcgtaacc--  
atggaaattggaaaggggatgaattccgatgtatgtgcccgaacttgattctaggggttggctctcgtaa-  
gttaatcgggaaaggcgggtgcagacactactgatgagccgtaacgtaccgctcagatccccagatacaataaaaacgag  
tctgtaatgtggcttttgcacgcatattttctgcatc  
>Ky21\_AY105752

----

tatgggccaacgctggcctaacaatcgctccgcttgctgacctagctggtggttgatgtatattttgagttttttatcagctg  
ctaccagcatgagccacaaggcatttgccttgtcgtaacc--  
atggaaattggaaaggggatgaattccgatgtatgtgcccgaacttgattctaggggttggctctcgtaa-  
gttaatcgggaaaggcgggtgcagacactactgatgagccgtaacgtaccgctcagatccccagatacaataaaaacgag  
tctgtaatgtggcttttgcac-----  
>M37W\_AY105752

atgctatgggccaacgctggcctaacaatcgctccgcttgctgacctagctggtggttgatgtatattttgagttttttatca  
gctgctaccagcatgagccacaaggcatttgccttgtcgtaacc--  
atggaaattggaaaggggatgaattccgatgtatgtgcccgaacttgattctaggggttggctctcgtaa-  
gttaatcgggaaaggcgggtgcagacactactgatgagccgtaacgtaccgctcagatccccagatacaataaaaacgag  
tctgtaatgtggcttttgcacgcatantttct-----  
>HP301\_AY105752

atgctatgggccaacgctggcctaacaatcgctccgcttgctgacctagctggtggttgatgtatattttgagttttttatca  
gctgctaccagcatgagccacaaggcatttgccttgtcgtaacc--  
atggaaattggaaaggggatgaattccgatgtatgtgcccgaacttgattctaggggttggctctcgtaa-  
gttaatcgggaaaggcgggtgcagacactactgatgagccgtaacgtaccgctcagatccccagatacaataaaaacgag  
tctgtaatgtggcttttgcacgcatantttct-----  
>CML247\_AY105752

atgctatgggccaacgctggcctaacaatcgctccgcttgctgacctagctggtggttgatgtatattttgagttttttatca  
gctgctaccagcatgagccacaaggcatttgccttgtcgtaacc--  
atggaaattggaaaggggatgaattccgatgtatgtgcccgaacttgattctaggggttggctctcgtaa-  
gttaatcgggaaaggcgggtgcagacactactgatgagccgtaacgtaccgctcagatccccagatacaataaaaacgag  
tctgtaatgtggcttttgcacgcatantttctgcatc  
>NC350\_AY105752

-----

atgggccaacgctggcctaacaatcgctccgcttgctgacctagctggtggttgatgtatattttgagttttttatcagctgc  
taccagcatgagccacaaggcatttgccttgtcgtaacc--  
atggaaattggaaaggggatgaattccgatgtatgtgcccgaacttgattctaggggttggctctcgtaa-  
gttaatcgggaaaggcgggtgcagacactactgatgagccgtaacgtaccgctcagatccccagatacaataaaaacgag

tctgtaatgtggcctttt-----  
>Ki3\_AY105752  
atgctatgggccaacgctggcctaacaatcgctccggttgctgacctagctggtggttgatgtatattttgagttttttatca  
gctgctaccagcatgagccacaaggcatttgccttgtcgtaacc--  
atggaaattggaaaggggatgaattccgatgtatgtgcccgaacttgattctaggggttggctctcgtaa-  
gttaatcgggaaaggcgggtgcagacactactgatgagccgtaacgtaccgctcagatccccagatacaataaaaacgag  
tctgtaatgtggccttttgcac-----  
>Ki11\_AY105752  
-----  
gggccaacgctggcctaacaatcgctccggttgctgacctagctggtggttgatgtatattttgagttttttatcagctgcta  
ccagcatgagccacaaggcatttgccttgtcgtaacc--  
atggaaattggaaaggggatgaattccgatgtatgtgcccgaacttgattctaggggttggctctcgtaa-  
gttaatcgggaaaggcgggtgcagacactactgatgagccgtaacgtaccgctcagatccccagatacaataaaaacgag  
tctgtaatgtggccttttgcac-----  
>CML333\_AY105752  
-----  
atgggccaacgctggcctaacaatcgctccggttgctgacctagctggtggttgatgtatattttgagttttttatcagctgc  
taccagcatgagccacaaggcatttgccttgtcgtaacc--  
atggaaattggaaaggggatgaattccgatgtatgtgcccgaacttgattctaggggttggctctcgtaa-  
gttaatcgggaaaggcgggtgcagacactactgatgagccgtaacgtaccgctcagatcccc-----  
-----  
>CML322\_AY105752  
-----  
tatgggccaacgctggcctaacaatcgctccggttgctgacctagctggtggttgatgtatattttgagttttttatcagctg  
ctaccagcatgagccacaaggcatttgccttgtcgtaacc--  
atggaaattggaaaggggatgaattccgatgtatgtgcccgaacttgattctaggggttggctctcgtaa-  
gttaatcgggaaaggcgggtgcagacactactgatgagccgtaacgtaccgctcagatccccagatacaataaaaacgag  
tctgtaatgt-----  
>CML69\_AY105752  
-----  
cgaaccgctggcctaacaatcgctccggttgctgacctagctggtggttgatgtatattttgagttttttatcagctgctacca  
gcatgagccacaaggcatttgccttgtcgtaacc--  
atggaaattggaaaggggatgaattccgatgtatgtgcccgaacttgattctaggggttggctctcgtaa-  
gttaatcgggaaaggcgggtgcagacactactgatgagccgtaacgtaccgctcagatccccagatacaataaaaacgag  
tctgtaatgtgg-----  
>Assinboine\_PI213793\_AY105752  
atgctatgggccaacgctggcctaacaatcgctccggttgctgacctagctggtggttgatgtatattttgagttttttatca  
gctgctaccagcatgagccacaaggcatttgccttgtcgtaacc--  
atggaaattggaaaggggatgaattccgatgtatgtgcccgaacttgattctaggggttggctctcgtaa-  
gttaatcgggaaaggcgggtgcagacactactgatgagccgtaacgtaccgctcagatccccagatacaataaaaacgag  
tctgtaatgtggccttttgcac-----  
>Gordo\_CHH\_160\_AY105752  
atgctatgggccaacgctggcctaacaatcgctccggttgctgacctagctggtggttgatgtatattttgagttttttatca  
gctgctaccagcatgagccacaaggcatttgccttgtcgtaacc--  
atggaaattggaaaggggatgaattccgatgtatgtgcccgaacttgattctaggggttggctctcgtaa-  
gttaatcgggaaaggcgggtgcagacactactgatgagccgtaacgtaccgctcagatccccagatacaataaaaacgag  
tctgtaatgtggccttttgcac-----  
>Guirua\_MAG\_450\_AY105752  
atgctatgggccaacgctggcctaacaatcgctccggttgctgacctagctggtggttgatgtatattttgagttttttatca  
gctgctaccagcatgagccacaaggcatttgccttgtcgtaacc--  
atggaaattggaaaggggatgaattccgatgtatgtgcccgaacttgattctaggggttggctctcgtaa-  
gttaatcgggaaaggcgggtgcagacactactgatgagccgtaacgtaccgctcagatccccagatacaataaaaacgag  
tctgtaatgtggccttttgcac-----  
>Nal-tel\_YUC\_7\_AY105752  
atgctatgggccaacgctggcctaacaatcgctccggttgctgacctagctggtggttgatgtatattttgagttttttatca  
gctgctaccagcatgagccacaaggcatttgccttgtcgtaacc--  
atggaaattggaaaggggatgaattccgatgtatgtgcccgaacttgattctaggggttggctctcgtaa-

gttaatcgggaaagggcgggtgcagacactactgatgagccgtaacgtaccgctcagatccccagatacaataaaacgag  
tctgtaatgtggccttttgcacgtatctactgcatc  
>Pisscotunto\_APC 13\_AY105752  
atgctatggggaaccgctggcctaacaatcgtccgcttgctgacctagctgctgcttggatgtatattttgagttttttatca  
gctgctaccagcatgagccacaaggcatttgccttgtcgtaaccc--  
atggaaattggaaaggggatgaattccgatgtatgtgcccgaacttgattctaggggttggctctcgtaa-  
gttaatcgggaaagggcgggtgcagacactactgatgagccgtaacgtaccgctcagatccccagatacaataaaacgag  
tctgtaatgtggccttttgcacgtatctactgcatc  
>Sabanero\_SAN 329\_AY105752  
atgctatggggaaccgctggcctaacaatcgtccgcttgctgacctagctgctgcttggatgtatattttgagttttttatca  
gctgctaccagcatgagccacaaggcatttgccttgtcgtaaccc--  
atggaaattggaaaggggatgaattccgatgtatgtgcccgaacttgattctaggggttggctctcgtaa-  
gttaatcgggaaagggcgggtgcagacactactgatgagccgtaacgtaccgctcagatccccagatacaataaaacgag  
tctgtaatgtggccttttgcacgtatctactgcatc  
>Serrano\_GUA 14\_AY105752  
atgctatggggaaccgctggcctaacaatcgtccgcttgctgacctagctgctgcttggatgtatattttgagttttttatca  
gctgctaccagcatgagccacaaggcatttgccttgtcgtaaccc--  
atggaaattggaaaggggatgaattccgatgtatgtgcccgaacttgattctaggggttggctctcgtaa-  
gttaatcgggaaagggcgggtgcagacactactgatgagccgtaacgtaccgctcagatccccagatacaataaaacgag  
tctgtaatgtggccttttgcacgtatctactgcatc  
>Zapalote Chico\_OAX 70\_AY105752  
-----  
gtggcctaacaatcgtccgcttgctgacctagctgctgcttggatgtatattttgagttttttatcagctgctaccagcatga  
gccacaaggcatttgccttgtcgtaaccc--  
atggaaattggaaaggggatgaattccgatgtatgtgcccgaacttgattctaggggttggctctcgtaa-  
gttaatcgggaaagggcgggtgcagacactactgatgagccgtaacgtaccgctcagatccccagatacaataaaacgag  
tctgtaatgtggccttttgcacgtatctactgcatc  
>Bolita\_OAX 68\_AY105752  
atgctatggggaaccgctggcctaacaatcgtccgcttgctgacctagctgctgcttggatgtatattttgagttttttatca  
gctgctaccagcatgagccacaaggcatttgccttgtcgtaaccc--  
atggaaattggaaaggggatgaattccgatgtatgtgcccgaacttgattctaggggttggctctcgtaa-  
gttaatcgggaaagggcgggtgcagacactactgatgagccgtaacgtaccgctcagatccccagatacaataaaacgag  
tctgtaatgtggccttttgcacgtatctactgcatc  
>Cateto Sulino\_URG 11\_AY105752  
atgctatggggaaccgctggcctaacaatcgtccgcttgctgacctagctgctgcttggatgtatattttgagttttttatca  
gctgctaccagcatgagccacaaggcatttgccttgtcgtaaccc--  
atggaaattggaaaggggatgaattccgatgtatgtgcccgaacttgattctaggggttggctctcgtaa-  
gttaatcgggaaagggcgggtgcagacactactgatgagccgtaacgtaccgctcagatccccagatacaataaaacgag  
tctgtaatgtggccttttgcacgtatctactgcatc  
>Chalqueno\_MEX 48\_AY105752  
atgctatggggaaccgctggcctaacaatcgtccgcttgctgacctagctgctgcttggatgtatattttgagttttttatca  
gctgctaccagcatgagccacaaggcatttgccttgtcgtaaccc--  
atggaaattggaaaggggatgaattccgatgtatgtgcccgaacttgattctaggggttggctctcgtaa-  
gttaatcgggaaagggcgggtgcagacactactgatgagccgtaacgtaccgctcagatccccagatacaataaaacgag  
tctgtaatgtggccttttgcacgtatctactgcatc  
>Chapalote\_SIN 2\_AY105752  
atgctatggggaaccgctggcctaacaatcgtccgcttgctgacctagctgctgcttggatgtatattttgagttttttatca  
gctgctaccagcatgagccacaaggcatttgccttgtcgtaaccc--  
atggaaattggaaaggggatgaattccgatgtatgtgcccgaacttgattctaggggttggctctcgtaa-  
gttaatcgggaaagggcgggtgcagacactactgatgagccgtaacgtaccgctcagatccccagatacaataaaacgag  
tctgtaatgtggccttttgcacgtatctactgcatc  
>Conico\_PUE 32\_AY105752  
atgctatggggaaccgctggcctaacaatcgtccgcttgctgacctagctgctgcttggatgtatattttgagttttttatca  
gctgctaccagcatgagccacaaggcatttgccttgtcgtaaccc--  
atggaaattggaaaggggatgaattccgatgtatgtgcccgaacttgattctaggggttggctctcgtaa-  
gttaatcgggaaagggcgggtgcagacactactgatgagccgtaacgtaccgctcagatccccagatacaataaaacgag  
tctgtaatgtggccttttgcacgtatctactgcatc

>Costeno\_VEN 453\_AY105752

atgctatggggaaccgtggcctaacaatcgctccggttgctgacctagctggtggttgatgtatattttgagttttttatca  
gctgctaccagcatgagccacaaggcatttgccttgtcgtaaccc--  
atggaaattggaaaggggatgaattccgatgtatgtgcccgaacttgattctaggggttggctctcgtaa-  
gttaatcgggaaagggcgggtgcagacactactgatgagccgtaacgtaccgctcagatccccagatacaataaaaacgag  
tctgtaatgtggccttttgcacgtattttctgcatc

>Cristalino Norteno\_CHI 349\_AY105752

atgctatggggaaccgtggcctaacaatcgctccggttgctgacctagctggtggttgatgtatattttgagttttttatca  
gctgctaccagcatgagccacaaggcatttgccttgtcgtaaccc--  
atggaaattggaaaggggatgaattccgatgtatgtgcccgaacttgattctaggggttggctctcgtaa-  
gttaatcgggaaagggcgggtgcagacactactgatgagccgtaacgtaccgctcagatccccagatacaataaaaacgag  
tctgtaatgtggccttttgcacgtattttctgcatc

>Dzit Bacal\_GUA 131\_AY105752

atgctatggggaaccgtggcctaacaatcgctccggttgctgacctagctggtggttgatgtatattttgagttttttatca  
gctgctaccagcatgagccacaaggcatttgccttgtcgtaaccc--  
atggaaattggaaaggggatgaattccgatgtatgtgcccgaacttgattctaggggttggctctcgtaa-  
gttaatcgggaaagggcgggtgcagacactactgatgagccgtaacgtaccgctcagatccccagatacaataaaaacgag  
tctgtaatgtggccttttgcacgtattttctgcatc

>Jalisco\_Benz 967\_AY105752

atgctatggggaaccgtggcctaacaatcgctccggttgctgacctagctggtggttgatgtatattttgagttttttatca  
gctgctaccagcatgagccacaaggcatttgccttgtcgtaaccc--  
atggaaattggaaaggggatgaattccgatgtatgtgcccgaacttgattctaggggttggctctcgtaa-  
gttaatcgggaaagggcgggtgcagacactactgatgagccgtaacgtaccgctcagatccccagatacaataaaaacgag  
tctgtaatgtggccttttgcacgtattttctgcatc

>Balsas\_Beadle & Kato Site 4\_AY105752

atgctatggggaaccgtggcctaacaatcgctccggttgctgacctagctggtggttgatgtatattttgagttttttatca  
gctgctaccagcatgagccacaaggcatttgccttgtcgtaaccc--  
atggaaattggaaaggggatgaattccgatgtatgtgcccgaacttgattctaggggttggctctcgtaa-  
gttaatcgggaaagggcgggtgcagacactactgatgagccgtaacgtaccgctcagatccccagatacaataaaaacgag  
tctgtaatgtggccttttgcacgtattttctgcatc

>Balsas\_Kato Site 4\_AY105752

atgctatggggaaccgtggcctaacaatcgctccggttgctgacctagctggtggttgatgtatattttgagttttttatca  
gctgctaccagcatgagccacaaggcatttgccttgtcgtaaccc--  
atggaaattggaaaggggatgaattccgatgtatgtgcccgaacttgattctaggggttggctctcgtaa-  
gttaatcgggaaagggcgggtgcagacactactgatgagccgtaacgtaccgctcagatccccagatacaataaaaacgag  
tctgtaatgtggccttttgcacgtattttctgcatc

>Balsas\_Wilkes Site 6\_AY105752

atgctatggggaaccgtggcctaacaatcgctccggttgctgacctagctggtggttgatgtatattttgagttttttatca  
gctgctaccagcatgagccacaaggcatttgccttgtcgtaaccc--  
atggaaattggaaaggggatgaattccgatgtatgtgcccgaacttgattctaggggttggctctcgtaa-  
gttaatcgggaaagggcgggtgcagacactactgatgagccgtaacgtaccgctcagatccccagatacaataaaaacgag  
tctgtaatgtggccttttgcacgtattttctgcatc

>Balsas\_INIFAP JSG y LOS 119\_AY105752

atgctatggggaaccgtggcctaacaatcgctccggttgctgacctagctggtggttgatgtatattttgagttttttatca  
gctgctaccagcatgagccacaaggcatttgccttgtcgtaaccc--  
atggaaattggaaaggggatgaattccgatgtatgtgcccgaacttgattctaggggttggctctcgtaa-  
gttaatcgggaaagggcgggtgcagacactactgatgagccgtaacgtaccgctcagatccccagatacaataaaaacgag  
tctgtaatgtggccttttgcacgtattttctgcatc

>Jalisco\_INIFAP JSG y MAS 401\_AY105752

atgctatggggaaccgtggcctaacaatcgctccggttgctgacctagctggtggttgatgtatattttgagttttttatca  
gctgctaccagcatgagccacaaggcatttgccttgtcgtaaccc--  
atggaaattggaaaggggatgaattccgatgtatgtgcccgaacttgattctaggggttggctctcgtaa-  
gttaatcgggaaagggcgggtgcagacactactgatgagccgtaacgtaccgctcagatccccagatacaataaaaacgag  
tctgtaatgtggccttttgcacgtattttctgcatc

>Balsas\_CIMMYT 8783\_AY105752

atgctatggggaaccgtggcctaacaatcgctccggttgctgacctagctggtggttgatgtatattttgagttttttatca  
gctgctaccagcatgagccacaaggcatttgccttgtcgtaaccc--

atggaaattggaaaggggatgaattccgatgtatgtgcccgaacttgattctaggggttggctctcgtaa-  
gttaatcgggaaagggcgggtgcagacactactgatgagccgtaacgtaccgctcagatccccagatacaataaaaacgag  
tctgtaatgtggcttttgcacgtattttctgcatc

>Oaxaca\_INIFAP JSG 197\_AY105752

atgctatgggccaaccgtggcctaacaatcgtcgggttgctgacctagctggtggttgatgtatattttgagttttttatca  
gctgctaccagcatgagccacaaggcatttgccttgtcgtaaccc--

atggaaattggaaaggggatgaattccgatgtatgtgcccgaacttgattctaggggttggctctcgtaa-  
gttaatcgggaaagggcgggtgcagacactactgatgagccgtaacgtaccgctcagatccccagatacaataaaaacgag  
tctgtaatgtggcttttgcacgtattttctgcatc

>Balsas\_INIFAP JSG 378\_AY105752

atgctatgggccaaccgtggcctaacaatcgtcgggttgctgacctagctggtggttgatgtatattttgagttttttatca  
gctgccaccagcatgagccacaaggcatttgccttgtcgtaaccc--

atggaaattggaaaggggatgaattccgatgtatgtgcccgaacttgattctaggggttggctctcgtaa-  
gttaatcgggaaagggcgggtgcagacactactgatgagccgtaacgtaccgctcagatccccagatacaataaaaacgag  
tctgtaatgtggcttttgcacgtattttctgcatc

>Balsas\_INIFAP JSG 374\_AY105752

atgctatgggccaaccgtggcctaacaatcgtcgggttgctgacctagctggtggttgatgtatattttgagttttttatca  
gctgctaccagcatgagccacaaggcatttgccttgtcgtaaccc--

atggaaattggaaaggggatgaattccgatgtatgtgcccgaacttgattctaggggttggctctcgtaa-  
gttaatcgggaaagggcgggtgcagacactactgatgagccgtaacgtaccgctcagatccccagatacaataaaaacgag  
tctgtaatgtggcttttgcacgtattttctgcatc

>Balsas\_INIFAP JSG y LOS 161\_AY105752

atgctatgggccaaccgtggcctaacaatcgtcgggttgctgacctagctggtggttgatgtatattttgagttttttatca  
gctgctaccagcatgagccacaaggcatttgccttgtcgtaaccc--

atggaaattggaaaggggatgaattccgatgtatgtgcccgaacttgattctaggggttggctctcgtaa-  
gttaatcgggaaagggcgggtgcagacactactgatgagccgtaacgtaccgctcagatccccagatacaataaaaacgag  
tctgtaatgtggcttttgcacgtattttctgcatc

>Balsas\_CIMMYT 11355\_AY105752

atgctatgggccaaccgtggcctaacaatcgtcgggttgctgacctagctggtggttgatgtatattttgagttttttatca  
gctgctaccagcatgagccacaaggcatttgccttgtcgtaaccc--

atggaaattggaaaggggatgaattccgatgtatgtgcccgaacttgattctaggggttggctctcgtaa-  
gttaatcgggaaagggcgggtgcagacactactgatgagccgtaacgtaccgctcagatccccagatacaataaaaacgag  
tctgtaatgtggcttttgcacgtattttctgcatc

>Balsas\_USDA PI566686\_AY105752

atgctatgggccaaccgtggcctaacaatcgtcgggttgctgacctagctggtggttgatgtatattttgagttttttatca  
gctgctaccagcatgagccacaaggcatttgccttgtcgtaaccc--

atggaaattggaaaggggatgaattccgatgtatgtgcccgaacttgattctaggggttggctctcgtaa-  
gttaatcgggaaagggcgggtgcagacactactgatgagccgtaacgtaccgctcagatccccagatacaataaaaacgag  
tctgtaatgtggcttttgcacgtattttctgcatc

>Jalisco\_INIFAP JSG y MAS 264\_AY105752

atgctatgggccaaccgtggcctaacaatcgtcgggttgctgacctagctggtggttgatgtatattttgagttttttatca  
gctgctaccagcatgagccacaaggcatttgccttgtcgtaaccc--

atggaaattggaaaggggatgaattccgatgtatgtgcccgaacttgattctaggggttggctctcgtaa-  
gttaatcgggaaagggcgggtgcagacactactgatgagccgtaacgtaccgctcagatccccagatacaataaaaacgag  
tctgtaatgtggcttttgcacgtattttctgcatc

>Tripsacum\_WW-2120\_AY105752

atgctatgggccaaccgtggcctaacaatcgtcgggttgctgacctagctggtggttgatgtatattt-----  
ttatcagctgctaccagcatgagccacagggcatttgccttgtcgtaaccccca-----

tggaaaggggatggattccgatgtatgtgcccgaacttgattctaggggttggctctcgtaaagttaaaccgggaaagggcggg  
tgcagacgctactgatgagccgtaacgtaccatccaatccccagatacaataaaaacgagctgtaatgtggcttttgc  
atcgtattttctgcatc

>B73\_AY105060

gactttgcaaagtgggagacgaggacgaatttccacctcttagagctgggatccgggtgagaacttacgtgtaggtcttac  
----

ggatacaactgatcatagagttagcaaaaggagctgaccagttgagctttgtgcagagtttttttggg'gcctcatagaa  
atgaggattattgcagtggcata----  
gtacagcctaccgtgtaaaatgtcgtcggcccccttatcaatctctctctttttcccgtagttgtcactagagttacaccg  
aacaaggtttatacagctaattgttcact-----  
>Oh43\_AY105060  
--  
ctttgcaaagtgggagacgaggacgaatttccacctcttagagctgggatccggtgagaacttacgtgtaggtcttac--  
--  
ggatacaactgatcatagagttagcaaaaggagctgaccagttgagctttgtgcagagtttttttggg'gcctcatagaa  
atgaggattattgcagtggcata----  
gtacagcctaccgtgtaaaatgtcgtcggcccccttatcaatctctctctttttcccgtagttgtcactagagttacaccg  
aacaaggtttatacagctaattgttcactagtataaacttagcaag  
>IL14H\_AY105060  
-  
actttgcaaagtgggagacgaggacgaatttccacctcttagagctgggatccggtgagaacttacgtgtaggtcttac-  
---  
ggatacaactgatcatagagttagcaaaaggagctgaccagttgagctttgtgcagagtttttttggg'gcctcatagaa  
atgaggattattgcagtggcata----  
gtacagcctaccgtgtaaaatgtcgtcggcccccttatcaatctctctctttttcccgtagttgtcactaga-----  
-----  
>Mo17\_AY105060  
gactttgcaaagtgggagacgaggacgaatttccacctcttagagctgggatccggtgagaacttacgtgtaggtcttac  
----  
ggatacaactgatcatagagttagcaaaaggagctgaccagttgagctttgtgcagagtttttttggg'gcctcatagaa  
atgaggattattgcagtggcata----  
gtacagcctaccgtgtaaaatgtcgtcggcccccttatcaatctctctctttttcccgtagttgtcactagagttacaccg  
aacaaggtttatacagctaattgttcactagtataaactta-----  
>Ky21\_AY105060  
gactttgcaaagtgggagacgaggacgaatttccacctcttagagctgggatccggtgagaacttacgtgtaggtcttac  
----  
ggatacaactgatcatagagttagcaaaaggagctgaccagttgagctttgtgcagagtttttttggg'gcctcatagaa  
atgaggattattgcagtggcata----  
gtacagcctaccgtgtaaaatgtcgtcggcccccttatcaatctctctctttttcccgtagttgtcactagagttacaccg  
aacaaggtttatacagctaattgttcactagtataaacttagcaag  
>M37W\_AY105060  
gactttgcaaagtgggagacgaggacgaatttccacctcttagagctgggatccggtgagaacttacgtgtaggtcttac  
----  
ggatacaactgatcatagagttagcaaaaggagctgaccagttgagctttgtgcagagtttttttggg'gcctcatagaa  
atgaggattattgcagtggcata----  
gtacagcctaccgtgtaaaatgtcgtcggcccccttatcaatctctctctttttcccgtagttgtcactagagttacaccg  
aacaaggtttatacagctaattgttcactagtataaactta-----  
>HP301\_AY105060  
-  
actttgcaaagtgggagacgaggacgaatttccacctcttagagctgggatccggtgagaacttacgtgtaggtcttac-  
---  
ggatacaactgatcatagagttagcaaaaggagctgaccagttgagctttgtgcagagtttttttggg'gcctcatagaa  
atgaggattattgcagtggcata----  
gtacagcctaccgtgtaaaatgtcgtcggcccccttatcaatctctctctttttcccgtagttgtcactagagttacaccg  
aacaaggtttatacagctaattgttcactagtata-----  
>CML247\_AY105060  
gactttgcaaagtgggagacgaggacgaatttccacctcttagagctgggatccggtgagaacttacgtgtaggtcttac  
----  
ggatacaactgatcatagagttagcaaaaggagctgaccagttgagctttgtgcagagtttttttggg'gcctcatagaa  
atgaggattattgcagtggcata----  
gtacagcctaccgtgtaaaatgtcgtcggcccccttatcaatctctctctttttcccgtagttgtcactagagttacaccg  
aacaaggtttatacagctaattgttcactagtataaactta-----  
>NC350\_AY105060

---  
tttgcaaagtgggagacgaggacgaatttccacctcttagagctgggatccggtgagaacttacgtgtaggtcttac---  
-  
ggatacaactgatcatagagttagcaaaaggagctgaccagttgagctttgtgcagagtttttttggg'gcctcatagaa  
atgaggattattgcagtggcata----  
gtacagcctaccgtgtaaaatgtcgtcggcccccttatcaatctctctctttttcccgtagttgtcactagagttacaccg  
aacaaggtttatacagctaattgttca-----  
>Ki3\_AY105060  
-----  
gcaaagtgggagacgaggacgaatttccacctcttagagctgggatccggtgagaacttacgtgtaggtcttac----  
ggatacaactgatcatagagttagcaaaaggagctgaccagttgagctttgtgcagagtttttttggg'gcctcatagaa  
atgaggattattgcagtggcata----  
gtacagcctaccgtgtaaaatgtcgtcggcccccttatcaatctctctctttttcccgtagttgtcactagagttacaccg  
aacaaggtttatacagctaattgttcaact-----  
>Kill\_AY105060  
gactttgcaaagtgggagacgaggacgaatttccacctcttagagctgggatccggtgagaacttacgtgtaggtcttac  
----  
ggatacaactgatcatagagttagcaaaaggagctgaccagttgagctttgtgcagagtttttttggg'gcctcatagaa  
atgaggattattgcagtggcata----  
gtacagcctaccgtgtaaaatgtcgtcggcccccttatcaatctctctctttttcccgtagttgtcactagagttacaccg  
aacaaggtttatacagctaattgttcaactagtagtataaacttagcaag  
>CML333\_AY105060  
-  
actttgcaaagtgggagacgaggacgaatttccacctcttagagctgggatccggtgagaacttacgtgtaggtcttac-  
---  
ggatacaactgatcatagagttagcaaaaggagctgaccagttgagctttgtgcagagtttttttggg'gcctcatagaa  
atgaggattattgcagtggcata----  
gtacagcctaccgtgtaaaatgtcgtcggcccccttatcaatctctctctttttcccgtagttgtcactagagttacaccg  
aacaaggtttatacagctaattgttcaactagtagtataaacttagcaag  
>CML322\_AY105060  
gactttgcaaagtgggagacgaggacgaatttccacctcttagagctgggatccggtgagaacttacgtgtaggtcttac  
----  
ggatacaactgatcatagagttagcaaaaggagctgaccagttgagctttgtgcagagtttttttggg'gcctcatagaa  
atgaggattattgcagtggcata----  
gtacagcctaccgtgtaaaatgtcgtcggcccccttatcaatctctctctttttcccgtagttgtcactagagttacaccg  
aacaaggtttatacagctaattgttcaactagtagtataaactta-----  
>CML69\_AY105060  
--  
ctttgcaaagtgggagacgaggacgaatttccacctcttagagctgggatccggtgagaacttacgtgtaggtcttac--  
--  
ggatacaactgatcatagagttagcaaaaggagctgaccagttgagctttgtgcagagtttttttggg'gcctcatagaa  
atgaggattattgcagtggcata----  
gtacagcctaccgtgtaaaatgtcgtcggcccccttatcaatctctctctttttcccgtagttgtcactagagttacaccg  
aacaaggtttatacagctaattgttca-----  
>Assinboine\_PI213793\_AY105060  
gactttgcaaagtgggagacgaggacgaatttccacctcttagagctgggatccggtgagaacttacgtgtaggtcttac  
----  
ggatacaactgatcatagagttagcaaaaggagctgaccagttgagctttgtgcagagtttttttggg'gcctcatagaa  
atgaggattattgcagtggcata----  
gtacagcctaccgtgtaaaatgtcgtcggcccccttatcaatctctctctttttcccgtagttgtcactagagttacaccg  
aacaaggtttatacagctaattgttcaactagtagtataaacttagcaag  
>Gordo\_CHH\_160\_AY105060  
gactttgcaaagtgggagacgaggacgaatttccacctcttagagctgggatccggtgagaacttacgtgtaggtcttac  
----  
ggatacaactgatcatagagttagcaaaaggagctgaccagttgagctttgtgcagagtttttttggg'gcctcatagaa  
atgaggattattgcagtggcata----  
gtacagcctaccgtgtaaaatgtcgtcggcccccttatcaatctctctctttttcccgtagttgtcactagagttacaccg



aacaagggtttatacagctaatagttcactagtataaacttagcaag  
>Guirua\_MAG 450\_AY105060  
gactttgcaaagtgggagacgaggacgaatttccacctcttagagctgggatccggtgagaacttacgtgtaggtcttac  
----  
ggatacaactgatcatagagtttagcaaaaggagctgaccagttgagctttgtgcagagtttttttggg'gcctcatagaa  
atgaggattattgcagtggcata----  
gtacagcctaccgtgtaaaatgtcgtcggcccttatcaatctctctctttttcccgtagttgtcactagagttacaccg  
aacaagggtttatacagctaatagttcactagtataaacttagcaag  
>Nal-tel\_YUC 7\_AY105060  
gactttgcaaagtgggagacgaggacgaatttccacctcttagagctgggatccggtgagaacttacgtgtaggtcttac  
----  
ggatacaactgatcatagagtttagcaaaaggagctgaccagttgagctttgtgcagagtttttttggg'gcctcatagaa  
atgaggattattgcagtggcata----  
gtacagcctaccgtgtaaaatgtcgtcggcccttatcaatctctctctttttcccgtagttgtcactagagttacaccg  
aacaagggtttatacagctaatagttcactagtataaacttagcaag  
>Pisscotunto\_APC 13\_AY105060  
gactttgcaaagtgggagacgaggacgaatttccacctcttagagctgggatccggtgagaacttacgtgtaggtcttac  
----  
ggatacaactgatcatagagtttagcaaaaggagctgaccagttgagctttgtgcagagtttttttggg'gcctcatagaa  
atgaggattattgcagtggcata----  
gtacagcctaccgtgtaaaatgtcgtcggcccttatcaatctctctctttttcccgtagttgtcactagagttacaccg  
aacaagggtttatacagctaatagttcactagtataaacttagcaag  
>Sabanero\_SAN 329\_AY105060  
gactttgcaaagtgggagacgaggacgaatttccacctcttagagctgggatccggtgagaacttacgtgtaggtcttac  
----  
ggatacaactgatcatagagtttagcaaaaggagctgaccagttgagctttgtgcagagtttttttggg'gcctcatagaa  
atgaggattattgcagtggcata----  
gtacagcctaccgtgtaaaatgtcgtcggcccttatcaatctctctctttttcccgtagttgtcactagagttacaccg  
aacaagggtttatacagctaatagttcactagtataaacttagcaag  
>Serrano\_GUA 14\_AY105060  
gactttgcaaagtgggagacgaggacgaatttccacctcttagagctgggatccggtgagaacttacgtgtaggtcttac  
----  
ggatacaactgatcatagagtttagcaaaaggagctgaccagttgagctttgtgcagagtttttttggg'gcctcatagaa  
atgaggattattgcagtggcata----  
gtacagcctaccgtgtaaaatgtcgtcggcccttatcaatctctctctttttcccgtagttgtcactagagttacaccg  
aacaagggtttatacagctaatagttcactagtataaacttagcaag  
>Bolita\_OAX 68\_AY105060  
gactttgcaaagtgggagacgaggacgaatttccacctcttagagctgggatccggtgagaacttacgtgtaggtcttac  
----  
ggatacaactgatcatagagtttagcaaaaggagctgaccagttgagctttgtgcagagtttttttggg'gcctcatagaa  
atgaggattattgcagtggcata----  
gtacagcctaccgtgtaaaatgtcgtcggcccttatcaatctctctctttttcccgtagttgtcactagagttacaccg  
aacaagggtttatacagctaatagttcactagtataaacttagcaag  
>Cateto Sulino\_URG 11\_AY105060  
-----  
caaagtgggagacgaggacgaatttccacctcttagagctgggatccggtgagaacttacgtgtaggtcttac----  
ggatacaactgatcatagagtttagcaaaaggagctgaccagttgagctttgtgcagagtttttttggg'gcctcatagaa  
atgaggattattgcagtggcata----  
gtacagcctaccgtgtaaaatgtcgtcggcccttatcaatctctctctttttcccgtagttgtcactagagttacaccg  
aacaagggtttatacagctaatagttcactagtataaacttagcaag  
>Chalqueno\_MEX 48\_AY105060  
gactttgcaaagtgggagacgaggacgaatttccacctcttagagctgggatccggtgagaacttacgtgtaggtcttac  
----  
ggatacaactgatcatagagtttagcaaaaggagctgaccagttgagctttgtgcagagtttttttggg'gcctcatagaa  
atgaggattattgcagtggcata----  
gtacagcctaccgtgtaaaatgtcgtcggcccttatcaatctctctctttttcccgtagttgtcactagagttacaccg  
aacaagggtttatacagctaatagttcactagtataaacttagcaag

>Chapalote\_SIN 2\_AY105060

-----

agtgggagacgaggacgaatttccacctcttagagctgggatccgggtgagaacttacgtgtaggtcttac----  
ggatacaactgatcatagagtttagcaaaatgagctgaccagttgagctttgtgcagagtttttttggg'gcctcatagaa  
atgaggattattgcagtggcata----  
gtacagcctaccgtgtaaaatgtcgtcggccccttatcaatctctctctttttcccgtagttgtcactagagttacaccg  
aacaaggttttatacagctaattgttcactagtataaacttagcaag

>Conico\_PUE 32\_AY105060

gactttgcaaagtgggagacgaggacgaatttccacctcttagagctgggatccgggtgagaacttacgtgtaggtcttac  
-----

ggatacaactgatcatagagtttagcaaaaggagctgaccagttgagctttgtgcagagtttttttggg'gcctcatagaa  
atgaggattattgcagtggcata----  
gtacagcctaccgtgtaaaatgtcgtcggccccttatcaatctctctctttttcccgtagttgtcactagagttacaccg  
aacaaggttttatacagctaattgttcactagtataaacttagcaag

>Costeno\_VEN 453\_AY105060

-----

aagtgggagacgaggacgaatttccacctcttagagctgggatccgggtgagaacttacgtgtaggtcttac----  
ggatacaactgatcatagagtttagcaaaaggagctgaccagttgagctttgtgcagagtttttttggg'gcctcatagaa  
atgaggattattgcagtggcata----  
gtacagcctaccgtgtaaaatgtcgtcggccccttatcaatctctctctttttcccgtagttgtcactagagttacaccg  
aacaaggttttatacagctaattgttcactagtataaacttagcaag

>Cristalino Norteno\_CHI 349\_AY105060

gactttgcaaagtgggagacgaggacgaatttccacctcttagagctgggatccgggtgagaacttacgtgtaggtcttac  
-----

ggatacaactgatcatagagtttagcaaaaggagctgaccagttgagctttgtgcagagtttttttggg'gcctcatagaa  
atgaggattattgcagtggcata----  
gtacagcctaccgtgtaaaatgtcgtcggccccttatcaatctctctctttttcccgtagttgtcactagagttacaccg  
aacaaggttttatacagctaattgttcactagtataaacttagcaag

>Dzit Bacal\_GUA 131\_AY105060

gactttgcaaagtgggagacgaggacgaatttccacctcttagagctgggatccgggtgagaacttacgtgtaggtcttac  
-----

ggatacaactgatcatagagtttagcaaaaggagctgaccagttgagctttgtgcagagtttttttggg'gcctcatagaa  
atgaggattattgcagtggcata----  
gtacagcctaccgtgtaaaatgtcgtcggccccttatcaatctctctctttttcccgtagttgtcactagagttacaccg  
aacaaggttttatacagctaattgttcactagtataaacttagcaag

>Jalisco\_Benz 967\_AY105060

gactttgcaaagtgggagacgaggacgaatttccacctcttagagctgggatccgggtgagaacttacgtgtaggtcttac  
-----

ggatacaactgatcatagagtttagcaaaaggagctgaccagttgagctttgtgcagagtttttttggg'gcctcatagaa  
atgaggattattgcagtggcata----  
gtacagcctaccgtgtaaaatgtcgtcggccccttatcaatctctctctttttcccgtagttgtcactagagttacaccg  
aacaaggttttatacagctaattgttcactagtataaacttagcaag

>Balsas\_Beadle & Kato Site 4\_AY105060

gactttgcaaagtgggagacgaggacgaatttccacctcttagagctgggatccgggtgagaacttacgtgtaggtcttac  
agacggatacaactgatcatagagtttagcaaaaggagctgaccagttgagctttgtgcagagttttcttggg'gcctgcat  
agaaatgaggatt---  
gcagtggcatacatagtagtacagcctaccgtgtaaaatgtcgtcggccccttatcagctctctctctttttcccgtaattgtc  
actagagttacaccgaacaaggttttatacagctaattgttcactagtataaacttagcaag

>Balsas\_Kato Site 4\_AY105060

gactttgcaaagtgggagacgaggacgaatttccacctcttagagctgggatccgggtgagaacttacgtgtaggtcttac  
agacggatacaactgatcatagagtttagcaaaaggagctgaccagttgagctttgtgcagagttttcttggg'gcctgcat  
agaaatgaggatt---

gcagtggcatacatagtagtacagcctaccgtgtaaaatgtcgtcggccccttatcaatctctctctttttcccgtagttgtc  
actagagttacaccgaacaaggttttatacagctaattgttcactagtataaacttagcaag

>Balsas\_Wilkes Site 6\_AY105060

gactttgcaaagtgggagacgaggacgaatttccacctcttagagctgggatccgggtgagaacttacgtgtaggtcttac  
-----

ggatacaactgatcatagagttagcaaaaggagctgaccagttgagctttgtgcagagtttttttgggcacctcatagaa  
atgaggattattgcagtggcata----  
gtacagcctaccgtgtaaaatgtcgtcggccccttatcaatctctctttttcccgtagttgtcactagagttacaccg  
aacaaggtttagacagctaattgttactagtataaacttagcaag  
>Balsas\_INIFAP JSP y Lo5130\_AY105060  
gactttgcaaagtgggagacgaggacgaatttccacctcttagggctgggatccgggtgagaacttacgtgtaggtcttac  
agacggatacaactgatcatagagtttagcaaaaggagctgaccagttgagctttgtgcagagttttcttgggcgccgcat  
agaaatgaggatt---  
gcagtggcatacatagtagtacaacctaccgtgtaaaatgtcgtcggccccttatcaatctctctctttttcccgtagttggt  
actagagttacaccaacaaggtttatacagctaattgttactagtataaacttagcaag  
>Balsas\_INIFAP JSG y LOS 119\_AY105060  
gactttgcaaagtgggagacgaggacgaatttccacctcttagagctgggatccgggtgagaacttacatgtaggtcttac  
agacggatacaactgatcatagagtttagcaaaagaagctgaccagttgagctttgtgcagagttttcttggggtgccgcat  
agaaacgaggatt---gcagtgtcata----gtacagcctaccctgtaaaatgtcgtcggccccttatcaatctctct--  
ttttcccgtagttggtactagagttacaccgaacaagatttatacagctaattgttactagtataaacttagcaag  
>Jalisco\_INIFAP JSG y MAS 401\_AY105060  
gactttgcaaagtgggagacgaggacgaatttccacctcttagagctgggatccgggtgagaacttacatgtaggtcttac  
agacggatacaactgatcatagagtttagcaaaagaagctgaccagttgagctttgtgcagagttttcttggggtgccgcat  
agaaacgaggatt---gcagtgtcata----gtacagcctaccctgtaaaatgtcgtcggccccttatcaatctctct--  
ttttcccgtagttggtactagagttacaccgaacaagatttatacagctaattgttactagtataaacttagcaag  
>Balsas\_CIMMYT 8783\_AY105060  
gactttgcaaagtgggagacgaggacgaatttccacctcttagagctgggatccgggtgagaacttacgtgtaggtcttac  
----  
ggatacaactgatcatagagtttagcaaaaggagctgaccagttgagctttgtgcagagtttttttgggcgccctcatagaa  
atgaggattattgcagtggcata----  
gtacagcctaccgtgtaaaatgtcgtcggccccttatcaatctctctctttttcccgtagttgtcactagagttacaccg  
aacaaggtttatacagctaattgttactagtataaacttagcaag  
>Oaxaca\_INIFAP JSG 197\_AY105060  
gactttgcaaagtgggagacgaggacgaatttccacctcttagagctgggatccgggtgagaacttacgtgtaggtcttac  
----  
ggatacaactgatcatagagtttagcaaaaggagctgaccagttgagctttgtgcagagtttttttgggcgccctcatagaa  
atgaggattattgcagtggcata----  
gtacagcctaccgtgtaaaatgtcgtcggccccttatcaatctctctctttttcccgtagttgtcactagagttacaccg  
aacaaggtttatacagctaattgttactagtataaacttagcaag  
>Balsas\_INIFAP JSG y LOS 109\_AY105060  
gactttgcaaagtgggagacgaggacgaatttccacctcttagagctgggatccgggtgagaacttacatgtaggtcttac  
agacggatacaactgatcatagagtttagcaaaaggagctgaccagttgagctttgtgcagagttttcttgggcgctgcat  
agaaatgaggatt---  
gcagtgtcatacatagtagtagcctaccgtgtaaaatgtcgtcggccccttatcaatctctctctttttcccgtagttggt  
aatagagttacaccgaacaagatttatacagctaattgttactagtataaacttagcaag  
>Balsas\_INIFAP JSG 378\_AY105060  
gactttgcaaagtgggagacgaggacgaatttccacctcttagagctgggatccgggtgagaacttacgtgtaggtcttac  
----  
ggatacaactgatcatagagtttagcaaaaggagctgaccagttgagctttgtgcagagtttttttgggcgccctcatagaa  
atgaggattattgcagtggcata----  
gtacagcctaccgtgtaaaatgtcgtcggccccttatcaatctctctctttttcccgtagttgtcactagagttacaccg  
aacaaggtttatacagctaattgttactagtataaacttagcaag  
>Balsas\_INIFAP JSG 374\_AY105060  
gactttgcaaagtgggagacgaggacgaatttccacctcttagagctgggatccgggtgagaacttacatgtaggtcttac  
agacggatacaactgatcatagagtttagcaaaagaagctgaccagttgagctttgtgcagagttttcttggggtgccgcat  
agaaacgaggatt---gcagtgtcata----gtacagcctaccctgtaaaatgtcgtcggccccttatcaatctctct--  
ttttcccgtagttggtactagagttacaccgaacaagatttatacagctaattgttactagtataaacttagcaag  
>Balsas\_INIFAP JSG y LOS 161\_AY105060  
gactttgcaaagtgggagacgaggacgaatttccacctcttagagctgggatccgggtgagaacttacgtgtaggtcttac  
----ggatacaactgatcatagagtttagcaaaaggagctgaccagttgagctttgtgcagagttttttt-  
gggcgccctcatagaaatgaggattattgcagtggcata----  
gtacagcctaccgtgtaaaatgtcgtcggccccttatcaatctctctctttttcccgtagttgtcactagagttacaccg

aacaagggtttatacagctaattgttcactagtagtataacttagcaag  
>Balsas\_CIMMYT\_11355\_AY105060  
gactttgcaaagtgggagacgaggacgaatttccacctcttagagctgggatccggtgagaacttacgtgtaggtcttac  
----  
ggatacaactgatcatagagtttagcaaaaggagctgaccagttgagctttgtgagagtttttttgggagcctcatagaa  
atgaggattattgcagtgccata----  
gtacagcctaccgtgtaaaatgtcgtcggcccccttatcaatctctctctttttcccgtagttgtcactagagttacaccg  
aacaagggtttatacagctaattgttcact-----  
>Balsas\_USDA\_PI566686\_AY105060  
gactttgcaaagtgggagacgaggacgaatttccacctcttagggctgggatccggtgagaacttacgtgtaggtcttac  
agacggatacaactgatcatagagtttagcaaaaggagctgaccagttgagctttgtgagagttttcttgggagcgcgc  
agaaatgaggatt---  
gcagtgccatacatagtagtacaacctaccgtgtaaaatgtcgtcggcccccttatcaatctctctctttttcccgtagttgtt  
actagagttacaccaacaagggtttatacagctaattgttcactagtagtataacttagcaag  
>Tripsacum\_WW-2120\_AY105060  
gactttgcaaagtgggagacgaggacgaatttccacctctcagagctgggatccggtgagaacttatatataggtcttac  
agacggatacaactgatcatagagtttagcaaaaggagctgaccagttgagctttgtgagagattttcttgggagcgcgc  
catagatatgaggatt---gcagtgccata----  
gtgtagcctaccgtgtaaaatctcgtcggtagccttatcaatctctcccttttcccgtagttgtttctagagttacaccg  
aacaagggtttatacagctaattgttcattagtagtataacttagcaag

>B73\_AY108178  
atctcagttcttatcatgtttcaaagggga--cactggcattatgtc-----  
gctggagcccctgatgcaacaggtaccctgccttct-  
ggttgcgcctgccttcgggtgacaactgatgctgtgggtcttctgttttttgaccatcaactgctgt-----  
gaagcttc-----  
tttgttatgcttttgccacttcgtgcttactcaattgctgctttctggagaagctgtaaacacagacacacctgctgta  
tttaattttgcct-

>Oh43\_AY108178  
-----cttatcatgtttcaaagggga--cactggcattatgtc-----  
gctggagcccctgatgcaacaggtaccctgccttct-  
ggttgcgcctgccttcgggtgacaactgatgctgtgggtcttctgttttttgaccatcaactgctgt-----  
gaagcttc-----  
tttgttatgcttttgccacttcgtgcttactcaattgctgctttctggagaagctgtaaacacagacacacctgctgta  
tttaattttgcct-

>IL14H\_AY108178  
----cagttcttatcatgtttcaaagggga--cactggcattatgtc-----  
gctggagcccctgatgcaacaggtaccctgccttct-  
ggttgcgcctgccttcgggtgacaactgatgctgtgggtcttctgttttttgaccatcaactgctgt-----  
gaagcttc-----  
tttgttatgcttttgccacttcgtgcttactcaattgctgctttctggagaagctgtaaacacagacacacctgctgta  
tttaattttgcct-

>Mo17\_AY108178  
----cagttcttatcatgtttcaaagggga--cactggcattatgtc-----  
gctggagcccctgatgcaacaggtaccctgccttct-  
ggttgcgcctgccttcgggtgacaactgatgctgtgggtcttctgttttttgaccatcaactgctgt-----  
gaagcttc-----  
tttgttatgcttttgccacttcgtgcttactcaattgctgctttctggagaagctgtaaacacagacacacctgctgta  
tttaattttgcctt

>Ky21\_AY108178  
----cagttcttatcatgtttcaaagggga--cactggcattatgtc-----  
gctggagcccctgatgcaacaggtaccctgccttct-  
ggttgcgcctgccttcgggtgacaactgatgctgtgggtcttctgttttttgaccatcaactgctgt-----  
gaagcttc-----  
tttgttatgcttttgccacttcgtgcttactcaattgctgctttctggagaagctgtaaacacagacacacctgctgta

ttaaattttgcctt  
>M37W\_AY108178  
----cagttcttatcatgtttcaaagggga--cactggcattatgctc-----  
gctggagcccctgatgcaacaggtaccctgccttct-  
ggttgcgcctgccttcgggtgacaactgatgctgtgggtcttctgtttttgacctcaactgctgt-----  
gaagcttc-----  
tttgttatgcttttgcgccacttcgtgcttactcaattgctgctttctggagaagctgtaaacacagacacacctgctgta  
ttaaattttgcctt-  
>HP301\_AY108178  
atctcagttcttatcatgtttcaaagggga--cactggcattatgctc-----  
gctggagcccctgatgcaacaggtaccctgccttct-  
ggttgcgcctgccttcgggtgacaactgatgctgtgggtcttctgtttttgacctcaactgctgt-----  
gaagcttc-----  
tttgttatgcttttgcgccacttcgtgcttactcaattgctgctttctggagaagctgtaaacacagacacacctgctgta  
ttaaattttgcctt-  
>CML247\_AY108178  
atctcagttcttatcatgtttcaaagggga--cactggcattatgctc-----  
gctggagcccctgatgcaacaggtaccctgccttct-  
ggttgcgcctgccttcgggtgacaactgatgctgtgggtcttctgtttttgacctcaactgctgt-----  
gaagcttc-----  
tttgttatgcttttgcgccacttcgtgcttactcaattgctgctttctggagaagctgtaaacacagacacacctgctgta  
ttaaattttgcctt-  
>NC350\_AY108178  
atctcagttcttatcatgtttcaaagggga--cactggcattatgctc-----  
gctggagcccctgatgcaacaggtaccctgccttct-  
ggttgcgcctgccttcgggtgacaactgatgctgtgggtcttctgtttttgacctcaactgctgt-----  
gaagcttc-----  
tttgttatgcttttgcgccacttcgtgcttactcaattgctgctttctggagaagctgtaaacacagacacacctgctgta  
ttaaattttgcctt-  
>Ki3\_AY108178  
-tctcagttcttatcatgtttcaaagggga--cactggcattatgctc-----  
gctggagcccctgatgcaacaggtaccctgccttct-  
ggttgcgcctgccttcgggtgacaactgatgctgtgggtcttctgtttttgacctcaactgctgt-----  
gaagcttc-----  
tttgttatgcttttgcgccacttcgtgcttactcaattgctgctttctggagaagctgtaaacacagacacacctgctgta  
ttaaattttgcctt-  
>Kill\_AY108178  
atctcagttcttatcatgtttcaaagggga--cactggcattatgctc-----  
gctggagcccctgatgcaacaggtaccctgccttct-  
ggttgcgcctgccttcgggtgacaactgatgctgtgggtcttctgtttttgacctcaactgctgt-----  
gaagcttc-----  
tttgttatgcttttgcgccacttcgtgcttactcaattgctgctttctggagaagctgtaaacacagacacacctgctgta  
ttaaattttgcctt-  
>CML333\_AY108178  
atctcagttcttatcatgtttcaaagggga--cactggcattatgctc-----  
gctggagcccctgatgcaacaggtaccctgccttct-  
ggttgcgcctgccttcgggtgacaactgatgctgtgggtcttctgtttttgacctcaactgctgt-----  
gaagcttc-----  
tttgttatgcttttgcgccacttcgtgcttactcaattgctgctttctggagaagctgtaaacacagacacacctgctgta  
ttaaattttgcctt-  
>CML322\_AY108178  
----cagttcttatcatgtttcaaagggga--cactggcattatgctc-----  
gctggagcccctgatgcaacaggtaccctgccttct-  
ggttgcgcctgccttcgggtgacaactgatgctgtgggtcttctgtttttgacctcaactgctgt-----  
gaagcttc-----  
tttgttatgcttttgcgccacttcgtgcttactcaattgctgctttctggagaagctgtaaacacagacacacctgctgta  
ttaaattttgcctt-

>CML69\_AY108178  
----cagttcttatcatgtttcaaagggga--cactggcattatgct-----  
gctggagcccctgatgcaacaggtaccctgccttct-  
ggttgcgcctgccttcggtgacaactgatgctgtggtccttctgtttttgaccatcaactgctgt-----  
gaagcttc-----  
tttgttatgcttttgcgccacttcgtgcttactcaattgctgctttctggagaagctgtaaacacagacacacctgctgta  
tttaattttgcct-

>Assinboine\_PI213793\_AY108178  
atctcagttcttatcatgtttcaaagggga--cactggcattatgct-----  
gctggagcccctgatgcaacaggtaccctgccttct-  
ggttgcgcctgccttcggtgacaactgatgctgtggtccttctgtttttgaccatcaactgctgt-----  
gaagcttc-----  
tttgttatgcttttgcgccacttcgtgcttactcaattgctgctttctggagaagctgtaaacacagacacacctgctgta  
tttaattttgcctt

>Gordo\_CHH 160\_AY108178  
---tcagttcttatcatgtttcaaagggga--cactggcattatgct-----  
gctggagcccctgatgcaacaggtaccctgccttct-  
ggttgcgcctgccttcggtgacaactgatgctgtggtccttctgtttttgaccatcaactgctgt-----  
gaagcttc-----  
tttgttatgcttttgcgccacttcgtgcttactcaattgctgctttctggagaagctgtaaacacagacacacctgctgta  
tttaattttgcctt

>Guirua\_MAG 450\_AY108178  
atctcagttcttatcatgtttcaaagggga--cactggcattatgct-----  
gctggagcccctgatgcaacaggtaccctgccttct-  
ggttgcgcctgccttcggtgacaactgatgctgtggtccttctgtttttgaccatcaactgctgt-----  
gaagcttc-----  
tttgttatgcttttgcgccacttcgtgcttactcaattgctgctttctggagaagctgtaaacacagacacacctgctgta  
tttaattttgcctt

>Nal-tel\_YUC 7\_AY108178  
atctcagttcttatcatgtttcaaagggga--cactggcattatgct-----  
gctggagcccctgatgcaacaggtaccctgccttct-  
ggttgcgcctgccttcggtgacaactgatgctgtggtccttctgtttttgaccatcaactgctgt-----  
gaagcttc-----  
tttgttatgcttttgcgccacttcgtgcttactcaattgctgctttctggagaagctgtaaacacagacacacctgctgta  
tttaattttgcctt

>Pisscotunto\_APC 13\_AY108178  
atctcagttcttatcatgtttcaaagggga--cactggcattatgct-----  
gctggagcccctgatgcaacaggtaccctgccttct-  
ggttgcgcctgccttcggtgacaactgatgctgtggtccttctgtttttgaccatcaactgctgt-----  
gaagcttc-----  
tttgttatgcttttgcgccacttcgtgcttactcaattgctgctttctggagaagctgtaaacacagacacacctgctgta  
tttaattttgcctt

>Sabanero\_SAN 329\_AY108178  
atctcagttcttatcatgtttcaaagggga--cactggcattatgct-----  
gctggagcccctgatgcaacaggtaccctgccttct-  
ggttgcgcctgccttcggtgacaactgatgctgtggtccttctgtttttgaccatcaactgctgt-----  
gaagcttc-----  
tttgttatgcttttgcgccacttcgtgcttactcaattgctgctttctggagaagctgtaaacacagacacacctgctgta  
tttaattttgcctt

>Zapalote Chico\_OAX 70\_AY108178  
atctcagttcttatcatgtttcaaagggga--cactggcattatgct-----  
gctggagcccctgatgcaacaggtaccctgccttct-  
ggttgcgcctgccttcggtgacaactgatgctgtggtccttctgtttttgaccatcaactgctgt-----  
gaagcttc-----  
tttgttatgcttttgcgccacttcgtgcttactcaattgctgctttctggagaagctgtaaacacagacacacctgctgta  
tttaattttgcctt

>Bolita\_OAX 68\_AY108178

atctcagttcttatcatggtttccaatggga--c--tggcatttgtgtc-----  
gctggagcccctgatgcaacaggtaccctgccttctgggtggcgctgccttcggtgacaagtgatgctgtggtcttctg  
tttttgacccatcaactgctgt-----gaagcttc-----  
ttagttatgcttttgcgccactttgtgcttactcaattgctgctttctggagaagctgtaaacacagacacacctgctgta  
tttaattttgcctt  
>Cateto Sulino\_URG 11\_AY108178  
atctcagttcttatcatggtttccaatggga--cactggcattatgtc-----  
gctggagcccctgatgcaacaggtaccctgccttct-  
ggttgcgcctgccttcggtgacaactgatgctgtggtccttctgtttttgacccatcaactgctgt-----  
gaagcttc-----  
tttgttatgcttttgcgccacttcgtgcttactcaattgctgctttctggagaagctgtaaacacagacacacctgctgta  
tttaattttgcctt  
>Chalqueno\_MEX 48\_AY108178  
atctcagttcttatcatggtttccaatggga--cactggcattatgtc-----  
gctggagcccctgatgcaacaggtaccctgccttct-  
ggttgcgcctgccttcggtgacaactgatgctgtggtccttctgtttttgacccatcaactgctgt-----  
gaagcttc-----  
tttgttatgcttttgcgccacttcgtgcttactcaattgctgctttctggagaagctgtaaacacagacacacctgctgta  
tttaattttgcctt  
>Chapalote\_SIN 2\_AY108178  
atctcagttcttatcatggtttccaatggga--c--tggcatttgtgtc-----  
gctggagcccctgatgcaacaggtaccctgccttctgggtggcgctgccttcggtgacaagtgatgctgtggtcttctg  
tttttgacccatcaactgctgt-----gaagcttc-----  
ttagttatgcttttgcgccactttgtgcttactcaattgctgctttctggagaagctgtaaacacagacacacctgctgta  
tttaattttgcctt  
>Conico\_PUE 32\_AY108178  
atctcagttcttatcatggtttccaatggga--cactggcattatgtc-----  
gctggagcccctgatgcaacaggtaccctgccttct-  
ggttgcgcctgccttcggtgacaactgatgctgtggtccttctgtttttgacccatcaactgctgt-----  
gaagcttc-----  
tttgttatgcttttgcgccacttcgtgcttactcaattgctgctttctggagaagctgtaaacacagacacacctgctgta  
tttaattttgcctt  
>Costeno\_VEN 453\_AY108178  
atctcagttcttatcatggtttccaatggga--cactggcattatgtc-----  
gctggagcccctgatgcaacaggtaccctgccttct-  
ggttgcgcctgccttcggtgacaactgatgctgtggtccttctgtttttgacccatcaactgctgt-----  
gaagcttc-----  
tttgttatgcttttgcgccacttcgtgcttactcaattgctgctttctggagaagctgtaaacacagacacacctgctgta  
tttaattttgcctt  
>Cristalino Norteno\_CHI 349\_AY108178  
atctcagttcttatcatggtttccaatggga--cactggcattatgtc-----  
gctggagcccctgatgcaacaggtaccctgccttct-  
ggttgcgcctgccttcggtgacaactgatgctgtggtccttctgtttttgacccatcaactgctgt-----  
gaagcttc-----  
tttgttatgcttttgcgccacttcgtgcttactcaattgctgctttctggagaagctgtaaacacagacacacctgctgta  
tttaattttgcctt  
>Dzit Bacal\_GUA 131\_AY108178  
atctcagttcttatcatggtttccaatggga--cactggcattatgtc-----  
gctggagcccctgatgcaacaggtaccctgccttct-  
ggttgcgcctgccttcggtgacaactgatgctgtggtccttctgtttttgacccatcaactgctgt-----  
gaagcttc-----  
tttgttatgcttttgcgccacttcgtgcttactcaattgctgctttctggagaagctgtaaacacagacacacctgctgta  
tttaattttgcctt  
>Jalisco\_Benz 967\_AY108178  
atctcagttcttatcatggtttccaatggga--c--tggcatttgtgtc-----  
gctggagcccctgatgcaacaggtaccctgccttctgggtggcgctgccttcggtgacaagtgatgctgtggtcttctg  
tttttgacccatcaactgctgt-----gaagcttc-----

ttagttatgcttttgcgccactttgtgcttactcaattgctgctttctggagaagctgtaaacacagacacacctgctgta  
ttaaattttgcctt  
>Balsas\_Beadle & Kato Site 4\_AY108178  
atctcagttcttatcatggtttccaatggga--c--tggcatttgctgct-----  
gctggagcccctgatgcaacaggtaccctgccttctgggtggcgcttgcttccggtgacaagtgatgctgctggtcttctg  
tttttgaccatcaactgctgt-----gaagcttc-----  
ttgttatgcttttgcgccactttgtgcttactcaattgctgctttctggagaagctgtaaacacagacacacctgctgta  
ttaaattttgcctt  
>Balsas\_Kato Site 4\_AY108178  
atctcagttcttatcatggtttccaatggga--c--tggcatttgctgct-----  
gctggagcccctgatgcaacaggtaccctgccttctgggtggcgcttgcttccggtgacaagtgatgctgctggtcttctg  
tttttgaccatcaactgctgt-----gaagcttc-----  
ttgttatgcttttgcgccactttgtgcttactcaattgctgctttctggagaagctgtaaacacagacacacctgctgta  
ttaaattttgcctt  
>Balsas\_Wilkes Site 6\_AY108178  
atctcagttcttatcatggtttccaatggga--c--tggcatttgctgct-----  
gctggagcccctgatgcaacaggtaccctgccttctgggtggcgcttgcttccggtgacaagtgatgctgctggtcttctg  
tttttgaccatcaactgctgt-----gaagcttc-----  
ttagttatgcttttgcgccactttgtgcttactcaattgctgctttctggagaagctgtaaacacagacacacctgctgta  
ttaaattttgcctt  
>Balsas\_INIFAP JSP y Lo5130\_AY108178  
atctcagttcttatcatggtttccaatggga--cactggcattatgct-----  
gctggagcccctgatgcaacaggtaccctgccttct-  
ggttgcgcctgccttccggtgacaactgatgctgctggtcttctgttttttgaccatcaactgctgt-----  
gaagcttc-----  
ttgttatgcttttgcgccacttctgcttactcaattgctgctttctggagaagctgtaaacacagacacacctgctgta  
ttaaattttgcctt  
>Balsas\_INIFAP JSG y LOS 119\_AY108178  
atctcagttcttatcatggtttccaatggga--c--tggcatttgctgct-----  
gctggagcccctgatgcaacaggtaccctgccttct-  
ggttgcgcctgccttccggtgacaagtgatgctgctggtcttctgttttttgaccatcaactgctgt-----  
gaagcttc-----  
ttgttatgcttttgcgccacttctgcttactcaattgctgctttctggagaagctgtaaacacagacacacctgctgta  
ttaaattttgcctt  
>Jalisco\_INIFAP JSG y MAS 401\_AY108178  
atctcagttcttatcatggtttccaatggga--c--tggcatttgctgct-----  
gctggagcccctgatgcaacaggtaccctgccttctgggtggcgcttgcttccggtgacaagtgatgctgctggtcttctg  
tttttgaccatcaactgctgt-----gaagcttc-----  
ttagttatgcttttgcgccactttgtgcttactcaattgctgctttctggagaagctgtaaca--  
gacacacctgctgtatttaaattttgcctt  
>Balsas\_CIMMYT 8783\_AY108178  
atctcagttcttatcatggtttccaattgga-----  
gctggagcccctgatgcaacaggtaccctgccttct-  
ggttgcgcctgccttccggtgacaagtgatgctgctggtcttctgttttttgactcatcaactgctgt-----  
gaagcttc-----  
ttgttatgcttttgcgccactttgtgcttactcaattgctgctttctggagaagctgtaaacacagacacacctgctgta  
ttaaattttgcctt  
>Oaxaca\_INIFAP JSG 197\_AY108178  
atctcagttcttatcatggtttccaatggga--cactggcattatgct-----  
gctggagcccctgatgcaacaggtaccctgccttct-  
ggttacgcctgccttccggtgacaagtgatgctgctggtcttctgttttttgaccatcaactgctgt-----  
gaagcttc-----  
ttagttatgcttttgcgccactttgtgcttactcaattgctgctttctggagaagctgtaaacacagaca--  
cctgctgtatttaaattttgcctt  
>Balsas\_INIFAP JSG y LOS 109\_AY108178  
atctcagttcttatcatggtttccaatggga--c--tggcatttgctgct-----  
gctggagcccctgatgcaacaggtaccctgccttctgggtggcgcttgcttccggtgacaagtgatgctgctggtcttctg



ttttttgacccatcaactgctgt-----gaagcttc-----  
ttagttatgcttttgcgccactttgtgcttactcaattgctgctttctggagaagctgtaacacagacacacctgctgta  
ttaaattttgcctt  
>Balsas\_INIFAP JSG 378\_AY108178  
atctcagttcttatcatgtttccaatggga--cactggcattatgctc-----  
gctggagcccctgatgcaacaggtaccctgccttct-  
ggttgcgcctgccttcggtgacaactgatgctgtggtccttctgtttttgacccatcaactgctgt-----  
gaagcttc-----  
tttgttatgcttttgcgccacttcgtgcttactcaattgctgctttctggagaagctgtaacacagacacacctgctgta  
ttaaattttgcctt  
>Balsas\_INIFAP JSG 374\_AY108178  
atctcagttcttatcatgtttccaatggga--c--tggcattgtgctc-----  
gctggagcccctgatgcaacaggtaccctgccttctgggtggcgcttgccttcggtgacaagtgatgctgtggtccttctg  
ttttttgacccatcaactgctgt-----gaagcttc-----  
tttgttatgcttttgcgccactttgtgcttactcaattgctgctttctggagaagctgtaacacagacacacctgctgta  
ttaaattttgcctt  
>Balsas\_INIFAP JSG y LOS 161\_AY108178  
atctcagttcttatcatgtttccaatggga--c--tggcattgtgctc-----  
gctggagcccctgatgcaacaggtaccctgccttctgggtggcgcttgccttcggtgacaagtgatgctgtggtccttctg  
ttttttgacccatcaactgctgt-----gaagcttc-----  
ttagttatgcttttgcgccactttgtgcttactcaattgctgctttctggagaagctgtaaca--  
gacacacctgctgtatttaattttgcctt  
>Balsas\_USDA PI566686\_AY108178  
atctcagttcttatcatgtttccaatggga--c--tggcattgtgctc-----  
gctggagcccctgatgcaacaggtaccctgccttct-  
ggttgcgcctgcctttggtgacaagtgatgctgtggtccttctgtttttgacccatcaactgctgt-----  
gaagtttc-----  
ttagttacgcttttgcgccacttcgtgcttactcaattgctgctttctggagaagctgtaacacagacacacctgctgta  
ttaaattttgcctt  
>Tripsacum\_WW-2120\_haplotype1\_AY108178  
atcacagttcttatcatgtttcccaaggggattca----cattgt-  
tcagctggaggctggagcccctgatgcaacaggtactctgcgttct-ggtggcgccatcgctc-  
gtgacaagtgattctgtggtccttctgatTTTTgatccatctactgccgctttctgacaaagctgtaacactgtcgtatTT  
agtaatgcttttgcctcacttcgtgcttactcagttgctgctttg-ggagaagctgtaacacaaa-  
cctgTTgtatTTaattttgc-tt  
>Tripsacum\_WW-2120\_haplotype2\_AY108178  
atcacagttcttatcatgtttcccaaggggattca----cattgt-  
tcagctggaggctggagcccctgatgcaacaggtactctgcgttct-ggtggcgccatcgctc-  
gtgacaagtgattctgtggtccttctgatTTTTgatccatctactgccgctttctgacaaagctgtaacactgtcgtatTT  
agtaatgcttttgcctcactt-----  
-----  
  
>B73\_AY109011  
ttgctgcccttgTTTTgatgaaggctg---  
tgcctattatgctataagccccttaagggagagcacttgatattattatcaatattcatttagggttcttgataaaa-  
ccgagtcactgTTtatatggagttgtcacatccaaagatacggaaattgtaatctagcataatgtcagatttgatctgt  
gtagtggagcattttatatcaattagtaactgTTgtatatcaccatctgctgtaaaactcgattgTTgacagTTaagata  
gtctaatagaa  
>Oh43\_AY109011  
ttgctgcccttgTTTTgatgaaggctg---  
tgcctattatgctataagccccttaagggagagcacttgatattattatcaatattcatttagggttcttgataaaa-  
ccgagtcactgTTtatatggagttgtcacatccaaagatacggaaattgtaatctagcataatgtcagatttgatctgt  
gtagtggagcattttatatcaattagtaactgTTgtatatcaccatctgctgtaaaactcgattgTTgacagTTaagata  
gtctaatagaa  
>IL14H\_AY109011

ttgctgcccttgTTTTgatgaaggctg---  
tgcctattatgctataagcccccttaagggagagcacttgatattattatcaatattcatttaggggttcttgataaaa-  
ccgagtcactgTTTtatatggagttgtcacatccaaagatacggaaattgtaatctagcataatgtcagatttgatctgt  
gtagtggagcattttatatcaattagtaactgTTgtatatacaccatctgctgtaaaaactcgattgTTgacagttaagata  
gtctaatagaa

>Mo17\_AY109011

-----gcccttgTTTTgatgaaggctg---  
tgcctattatgctataagcccccttaagggagagcacttgatattattatcaatattcatttaggggttcttgataaaa-  
ccgagtcactgTTTtatatggagttgtcacatccaaagatacggaaattgtaatctagcataatgtcagatttgatctgt  
gtagtggagcattttatatcaattagtaactgTTgtatatacaccatctgctgtaaaaactcgattgTTgacagttaagata  
gtctaatagaa

>Ky21\_AY109011

--gctgcccttgTTTTgatgaaggctg---  
tgcctattatgctataagcccccttaagggagagcacttgatattattatcaatattcatttaggggttcttgataaaa-  
ccgagtcactgTTTtatatggagttgtcacatccaaagatacggaaattgtaatctagcataatgtcagatttgatctgt  
gtagtggagcattttatatcaattagtaactgTTgtatatacaccatctgctgtaaaaactcgattgTTgacagtta-----  
-----

>M37W\_AY109011

ttgctgcccttgTTTTgatgaaggctg---  
tgcctattatgctataagcccccttaagggagagcacttgatattattatcaatattcatttaggggttcttgataaaa-  
ccgagtcactgTTTtatatggagttgtcacatccaaagatacggaaattgtaatctagcataatgtcagatttgatctgt  
gtagtggagcattttatatcaattagtaactgTTgtatatacaccatctgctgtaaaaactcgattgTTgacagttaagata  
gtctaatagaa

>HP301\_AY109011

-----cccttgTTTTgatgaaggctg---  
tgcctattatgctataagcccccttaagggagagcacttgatattattatcaatattcatttaggggttcttgataaaa-  
ccgagtcactgTTTtatatggagttgtcacatccaaagatacggaaattgtaatctagcataatgtcagatttgatctgt  
gtagtggagcattttatatcaattagtaactgTTgtatatacaccatctgctgtaaaaactcgatt-----  
-----

>CML247\_AY109011

-----gTTTTgatgaaggctg---  
tgcctattatgctataagcccccttaagggagagcacttgatattattatcaatattcatttaggggttcttgataaaa-  
ccgagtcactgTTTtatatggagttgtcacatccaaagatacggaaattgtaatctagcataatgtcagatttgatctgt  
gtagtggagcattttatatcaattagtaactgTTgtatatacaccatctgctgtaaaaactcgatt-----  
-----

>NC350\_AY109011

ttgctgcccttgTTTTgatgaaggctg---  
tgcctattatgctataagcccccttaagggagagcacttgatattattatcaatattcatttaggggttcttgataaaa-  
ccgagtcactgTTTtatatggagttgtcacatccaaagatacggaaattgtaatctagcataatgtcagatttgatctgt  
gtagtggagcattttatatcaattagtaactgTTgtatatacaccatctgctgtaaaaactcgattgTTgacagttaagata  
g-----

>Ki3\_AY109011

ttgctgcccttgTTTTgatgaaggctg---  
tgcctattatgctataagcccccttaagggagagcacttgatattattatcaatattcatttaggggttcttgataaaa-  
ccgagtcactgTTTtatatggagttgtcacatccaaagatacggaaattgtaatctagcataatgtcagatttgatctgt  
gtagtggagcattttatatcaattagtaactgTTgtatatacaccatctgctgtaaaaactcgattgTTgacagttaagata  
gtctaataga-

>Kill\_AY109011

-----gcccttgTTTTgatgaaggctg---  
tgcctattatgctataagcccccttaagggagagcacttgatattattatcaatattcatttaggggttcttgataaaa-  
ccgagtcactgTTTtatatggagttgtcacatccaaagatacggaaattgtaatctagcataatgtcagatttgatctgt  
gtagtggagcattttatatcaattagtaactgTTgtatatacaccatctgctgtaaaaactcgattgTTgacagttaa-----  
-----

>CML333\_AY109011

-----cccttgTTTTgatgaaggctg---  
tgcctattatgctataagcccccttaagggagagcacttgatattattatcaatattcatttaggggttcttgataaaa-  
ccgagtcactgTTTtatatggagttgtcacatccaaagatacggaaattgtaatctagcataatgtcagatttgatctgt

gtagtggagcattttatatcaattagtaactggtgtatatcaccatctgctgtaaaaactcgatt-----  
-----

>CML322\_AY109011

-----gcccttggtttgatgaaggctg---

tgcctattatgctataagcccccttaagggagagcacttgatattattatcaatattcatttaggggttcttgataaaa-  
ccgagtcactgtttatatggagttgtcacatccaaagatacggaaattgtaatctagcataatgtcagatttgatctgt  
gtagtggagcattttatatcaattagtaactggtgtatatcaccatctgctgtaaaaactcgatt-----  
-----

>CML69\_AY109011

-----ttttgatgaaggctg---

tgcctattatgctataagcccccttaagggagagcacttgatattattatcaatattcatttaggggttcttgataaaa-  
ccgagtcactgtttatatggagttgtcacatccaaagatacggaaattgtaatctagcataatgtcagatttgatctgt  
gtagtggagcattttatatcaattagtaactggtgtatatcaccatctgctgtaaaaactcgattggtgacagttaagata  
gtctaatagaa

>Assinboine\_PI213793\_AY109011

ttgctgcccttggtttgatgaaggctg---

tgcctattatgctataagcccccttaagggagagcacttgatattattatcaatattcatttaggggttcttgataaaa-  
ccgagtcactgtttatatggagttgtcacatccaaagatacggaaattgtaatctagcataatgtcagatttgatctgt  
gtagtggagcattttatatcaattagtaactggtgtatatcaccatctgctgtaaaaactcgattggtgacagttaagata  
gtctaatagaa

>Gordo\_CHH 160\_AY109011

ttgctgcccttggtttgatgaaggctg---

tgcctattatgctataagcccccttaagggagagcacttgatattattatcaatattcatttaggggttcttgataaaa-  
ccgagtcactgtttatatggagttgtcacatccaaagatacggaaattgtaatctagcataatgtcagatttgatctgt  
gtagtggagcattttatatcaattagtaactggtgtatatcaccatctgctgtaaaaactcgattggtgacagttaagata  
gtctaatagaa

>Guirua\_MAG 450\_AY109011

ttgctgcccttggtttgatgaaggctg---

tgcctattatgctataagcccccttaagggagagcacttgatattattatcaatattcatttaggggttcttgataaaa-  
ccgagtcactgtttatatggagttgtcacatccaaagatacggaaattgtaatctagcataatgtcagatttgatctgt  
gtagtggagcattttatatcaattagtaactggtgtatatcaccatctgctgtaaaaactcgattggtgacagttaagata  
gtctaatagaa

>Nal-tel\_YUC 7\_AY109011

ttgctgcccttggtttgatgaaggctg---

tgcctattatgctataagcccccttaagggagagcacttgatattattatcaatattcatttaggggttcttgataaaa-  
ccgagtcactgtttatatggagttgtcacatccaaagatacggaaattgtaatctagcataatgtcagatttgatctgt  
gtagtggagcattttatatcaattagtaactggtgtatatcaccatctgctgtaaaaactcgattggtgacagttaagata  
gtctaatagaa

>Pisscotunto\_APC 13\_AY109011

ttgctgcccttggtttgatgaaggctg---

tgcctattatgctataagcccccttaagggagagcacttgatattattatcaatattcatttaggggttcttgataaaa-  
ccgagtcactgtttatatggagttgtcacatccaaagatacggaaattgtaatctagcataatgtcagatttgatctgt  
gtagtggagcattttatatcaattagtaactggtgtatatcaccatctgctgtaaaaactcgattggtgacagttaagata  
gtctaatagaa

>Sabanero\_SAN 329\_AY109011

ttgctgcccttggtttgatgaaggctg---

tgcctattatgctataagcccccttaagggagagcacttgatattattatcaatattcatttaggggttcttgataaaa-  
ccgagtcactgtttatatggagttgtcacatccaaagatacggaaattgtaatctagcataatgtcagatttgatctgt  
gtagtggagcattttatatcaattagtaactggtgtatatcaccatctgctgtaaaaactcgattggtgacagttaagata  
gtctaatagaa

>Serrano\_GUA 14\_AY109011

ttgctgcccttggtttgatgaaggctg---

tgcctattatgctataagcccccttaagggagagcacttgatattattatcaatattcatttaggggttcttgataaaaac  
cgagtcactgtttatatggagttgtcacatccaaagatacggaaattgtaatctagcataatgtcagatttgatctgtg  
tagtggagcattttatatcaattagtaactggtgtatatcaccatctggtgtaaaaactcgattggtgacagttaagata  
gtctaatagaa

>Zapalote Chico\_OAX 70\_AY109011

ttgctgcccttgTTTTgatgaaggctg---  
tgcctattatgctataagcccccttaagggagagcacttgatattattatcaatattcatttaggggttcttgataaaa-  
ccgagtcactgTTTtatatggagttgtcacatccaaagatacggaaattgtaatctagcataatgtcagatttgatctgt  
gtagtggagcattttatatcaattagtaactgTTgtatatacaccatctgctgtaaaaactcgattgTTgacagttaagata  
gtctaatagaa

>Bolita\_OAX 68\_AY109011

ttgctgcccttgTTTTgatgaaggctg---  
tgcctattatgctataagcccccttaagggagagcacttgatattattatcaatattcatttaggggttcttgataaaa-  
ccgagtcactgTTTtatatggagttgtcacatccaaagatacggaaattgtaatctagcataatgtcagatttgatctgt  
gtagtggagcattttatatcaattagtaactgTTgtatatacaccatctgctgtaaaaactcgattgTTgacagttaagata  
gtctaatagaa

>Cateto Sulino\_URG 11\_AY109011

ttgctgcccttgTTTTgatgaaggctg---  
tgcctattatgctataagcccccttaagggagagcacttgatattattatcaatattcatttaggggttcttgataaaa-  
ccgagtcactgTTTtatatggagttgtcacatccaaagatacggaaattgtaatctagcataatgtcagatttgatctgt  
gtagtggagcattttatatcaattagtaactgTTgtatatacaccatctgctgtaaaaactcgattgTTgacagttaagata  
gtctaatagaa

>Chalqueno\_MEX 48\_AY109011

ttgctgcccttgTTTTgatgaaggctg---  
tgcctattatgctataagcccccttaagggagagcacttgatattattatcaatattcatttaggggttcttgataaaa-  
ccgagtcactgTTTtatatggagttgtcacatccaaagatacggaaattgtaatctagcataatgtcagatttgatctgt  
gtagtggagcattttatatcaattagtaactgTTgtatatacaccatctgctgtaaaaactcgattgTTgacagttaagata  
gtctaatagaa

>Chapalote\_SIN 2\_AY109011

ttgctgcccttgTTTTgatgaaggctg---  
tgcctattatgctataagcccccttaagggagagcacttgatattattatcaatattcatttaggggttcttgataaaa-  
ccgagtcactgTTTtatatggagttgtcacatccaaagatacggaaattgtaatctagcataatgtcagatttgatctgt  
gtagtggagcattttatatcaattagtaactgTTgtatatacaccatctgctgtaaaaactcgattgTTgacagttaagata  
gtctaatagaa

>Conico\_PUE 32\_AY109011

ttgctgcccttgTTTTgatgaaggctg---  
tgcctattatgctataagcccccttaagggagagcacttgatattattatcaatattcatttaggggttcttgataaaa-  
ccgagtcactgTTTtatatggagttgtcacatccaaagatacggaaattgtaatctagcataatgtcagatttgatctgt  
gtagtggagcattttatatcaattagtaactgTTgtatatacaccatctgctgtaaaaactcgattgTTgacagttaagata  
gtctaatagaa

>Costeno\_VEN 453\_AY109011

ttgctgcccttgTTTTgatgaaggctg---  
tgcctattatgctataagcccccttaagggagagcacttgatattattatcaatattcatttaggggttcttgataaaa-  
ccgagtcactgTTTtatatggagttgtcacatccaaagatacggaaattgtaatctagcataatgtcagatttgatctgt  
gtagtggagcattttatatcaattagtaactgTTgtatatacaccatctgctgtaaaaactcgattgTTgacagttaagata  
gtctaatagaa

>Cristalino Norteno\_CHI 349\_AY109011

ttgctgcccttgTTTTgatgaaggctg---  
tgcctattatgctataagcccccttaagggagagcacttgatattattatcaatattcatttaggggttcttgataaaa-  
ccgagtcactgTTTtatatggagttgtcacatccaaagatacggaaattgtaatctagcataatgtcagatttgatctgt  
gtagtggagcattttatatcaattagtaactgTTgtatatacaccatctgctgtaaaaactcgattgTTgacagttaagata  
gtctaatagaa

>Dzit Bacal\_GUA 131\_AY109011

ttgctgcccttgTTTTgatgaaggctg---  
tgcctattatgctataagcccccttaagggagagcacttgatattattatcaatattcatttaggggttcttgataaaa-  
ccgagtcactgTTTtatatggagttgtcacatccaaagatacggaaattgtaatctagcataatgtcagatttgatctgt  
gtagtggagcattttatatcaattagtaactgTTgtatatacaccatctgctgtaaaaactcgattgTTgacagttaagata  
gtctaatagaa

>Jalisco\_Benz 967\_AY109011

ttgctgcccttgTTTTgatgaaggctg---  
tgcctattatgctataagcccccttaagggagagcacttgatattattatcaatattcatttaggggttcttgataaaa-  
ccgagtcactgTTTtatatggagttgtcacatccaaagatacggaaattgtaatctagcataatgtcagatttgatctgt

gtagtggagcattttatatcaattagtaactggtgtatatcaccatctgctgtaaaaactcgattggtgacagttaagata  
gtctaatagaa

>Balsas\_Beadle & Kato Site 4\_AY109011

ttgctgcccttggtttgatgaaggctg---

tgcctattatgctataagcccccttaagggagagcacttgatattattatcaatattcatttaggggttcttgataaaa-  
ccgagtcactgtttatatggagttgtcacatccaaagatacggaaattgtaatctagcataatgtcagatttgatctgt  
gtagtggagcattttatatcaattagtaactggtgtatatcaccatctggtgtaaaaactcgattggtgacagttaagata  
gtctaatagaa

>Balsas\_Kato Site 4\_AY109011

ttgctgcccttggtttgatgaaggctg---

tgcctattatgctataagcccccttaagggagagcacttgatattattatcaatattcatttaggggttcttgataaaa-  
ccgagtcactgtttatatggagttgtcacatccaaagatacggaaattgtaatctagcataatgtcagatttgatctgt  
gtagtggagcattttatatcaattagtaactggtgtatatcaccatctgctgtaaaaactcgattggtgacagttaagata  
gtctaatagaa

>Balsas\_Wilkes Site 6\_AY109011

ttgctgcccttggtttgatgaaggctg---

tgcctattatgctataagcccccttaagggagagcacttgatattattatcaatattcatttaggggttcttgataaaa-  
ccgagtcactgtttatatggagttgtcacatccaaagatacggaaattgtaatctagcataatgtcagatttgatctgt  
gtagtggagcattttatatcaattagtaactggtgtatatcaccatctggtgtaaaaactcgattggtgacagttaagata  
gtctaatagaa

>Balsas\_INIFAP JSP y Lo5130\_AY109011

ttgctgcccttggtttgatgaaggctg---

tgcctattatgctataagcccccttaagggagagcacttgatattattatcaatattcatttaggggttcttgataaaa-  
ccgagtcactgtttatatggagttgtcacatccaaagatacggaaattgtaatctagcataatgtcagatttgatctgt  
gtagtggagcattttatatcaattagtaactggtgtatatcaccatctgctgtaaaaactcgattggtgacagttaagata  
gtctaatagaa

>Balsas\_INIFAP JSG y LOS 119\_AY109011

ttgctgcccttggtttgatgaaggctg---

tgcctattatgctataagcccccttaagggagagcacttgatattattatcaatattcatttaggggttcttgataaaa-  
ccgagtcactgtttatatggagttgtcacatccaaagatacggaaattgtaatctagcataatgtcagatttgatctgt  
gtagtggagcattttatatcaattagtaactggtgtatatcaccatctgctgtaaaaactcgattggtgacagttaagata  
gtctaatagaa

>Jalisco\_INIFAP JSG y MAS 401\_AY109011

ttgctgcccttggtttgatgaaggctg---

tgcctattatgctataagcccccttaagggagagcacttgatattattatcaatattcatttaggggttcttgataaaa-  
ccgagtcactgtttatatggagttgtcacatccaaagatacggaaattgtaatctagcataatgtcagatttgatctgt  
gtagtggagcattttatatcaattagtaactggtgtatatcaccatctgctgtaaaaactcgattggtgacagttaagata  
gtctaatagaa

>Balsas\_CIMMYT 8783\_AY109011

ttgctgcccttggtttgatgaaggctg---

tgcctattatgctataagcccccttaagggagagcacttgatattattatcaatattcatttaggggttcttgataaaa-  
ccgagtcactgtttatatggagttgtcacatccaaagatacggaaattgtaatctagcataatgtcagatttgatctgt  
gtagtggagcattttatatcaattagtaactggtgtatatcaccatctgctgtaaaaactcgattggtgacagttaagata  
gtctaatagaa

>Oaxaca\_INIFAP JSG 197\_AY109011

ttgctgcccttggtttgatgaaggctg---

tgcctattatgctataagcccccttaagggagagcacttgatattattatcaatattcatttaggggttcttgataaaa-  
ccgagtcactgtttatatggagttgtcacatccaaagatacggaaattgtaatctagcataatgtcagatttgatctgt  
gtagtggagcattttatatcaattagtaactggtgtatatcaccatctggtgtaaaaactcgattggtgacagttaagata  
gtctaatagaa

>Balsas\_INIFAP JSG y LOS 109\_AY109011

ttgctgcccttggtttgatgaaggctg---

tgcctattatgctataagcccccttaagggagagcacttgatattattatcaatattcatttaggggttcttgataaaa-  
ccgagtcactgtttatatggagttgtcacatccaaagatacggaaattgtaatctagcataatgtcagatttgat--  
gtgtagtggagcattttatatcaattagtaactggtgtatatcaccatctggtgtaaaaactcgattggtgacaattaaga  
tagtctaatagaa

>Balsas\_INIFAP JSG 378\_AY109011

ttgctgcccttgTTTTgatgaaggctg---  
tgcctattatgctataagcccccttaagggagagcacttgatattattatcaatattcatttaggggttcttgataaaa-  
ccgagtcactgTTTatatggagttgtcacatccaaagatacggaaattgtaatctagcataatgtcagatttgatctgt  
gtagtggagcattttatatcaattagtaactgTTgtatatacaccatctgctgtaaaactcgattgTTgacagttaagata  
gtctaatagaa

>Balsas\_INIFAP JSG 374\_AY109011

ttgctgcccttgTTTTgatgaaggctg---  
tgcctattatgctataagcccccttaagggagagcacttgatattattatcaatattcatttaggggttcttgataaaa-  
ccgagtcactgTTTatatggagttgtcacatccaaagatacggaaattgtaatctagcataatgtcagatttgatctgt  
gtagtggagcattttatatcaattagtaactgTTgtatatacaccatctgTTgtaaaactcgattgTTgacagttaagata  
gtctaatagaa

>Balsas\_INIFAP JSG y LOS 161\_AY109011

ttgctgcccttgTTTTgatgaaggctg---  
tgcctattatgctataagcccccttaagggagagcacttgatattattatcaatattcatttaggggttcttgataaaa-  
ccgagtcactgTTTatatggagttgtcacatccaaagatacggaaattgtaatctagcataatgtcagatttgatctgt  
gtagtggagcattttatatcaattagtaactgTTgtatatacaccatctgctgtaaaactcgattgTTgacagttaagata  
gtctaatagaa

>Balsas\_USDA PI566686\_AY109011

ttgctgcccttgTTTTgatgaaggctg---  
tgcctattatgctataagcccccttaagggagagcacttgatattattatcaatattcatttaggggttcttgataaaa-  
ccgagtcactgTTTatatggagttgtcacatccaaagatacggaaattgtaatctagcataatgtcagatttgatctgt  
gtagtggagcattttatatcaattagtaactgTTgtatatacaccatctgctgtaaaactcgattgTTgacagttaagata  
gtctaatagaa

>Jalisco\_INIFAP JSG y MAS 264\_AY109011

ttgctgcccttgTTTTgatgaaggctg---  
tgcctgTTatgctataagcccccttaagggagagcacttgatattattatcaatattcatttaggggttcttgataaaa-  
ccgagtcactgTTTatatggagttgtcacatccaaagatacggaaattgtaatctagcataatgtcagatttgatctgt  
gtagtggagcattttatatcaattagtaactgTTgtatatacaccatctgTTgtaaaactcgattgTTgacagttaagata  
gtctaatagaa

>Tripsacum\_WW-2120\_AY109011

ttgctgcccttgTTTTgatgaaggctgaagtgcctattatgctataagcccccttaagggtgagcacttgatattattat  
caatatccacttaggggttctcgataaaa-ccgagtcactgTTcatatggagt-  
gtcacatccgaagataagaaaattgcaatctagcataatgtcagatttgatctgtgtagtggagcgttttatatcaat-  
--taactgTTgtatatacagcttctgTTgtaaaattcgattgTTgacagttaagatagtctaatagaa

>B73\_AY107827

gcagttccagtcctcaaaacaattgagcatgctgagataggggtgattctattgacatctcttaggctgtcatatttattgggt  
tgagtgatatgctattatgttaacttgatgacgtgaggcttgggtgttcgggtattccgtgt-----  
ggagcatttgaggaagcatttaggtttcaggaagccacgactgggtgtttctgcctgtatagattcccattccctagtgtg  
tacaggtactgtattttatctg-----

>Oh43\_AY107827

gcagttccagtcctcaaaacaattgagcatgctgagataggggtgattctattgacatctcttaggctgtcatatttattgggt  
tgagtgatatgctattatgttaacttgatgacgtgaggcttgggtgttcgggtattccgtgt-----  
ggagcatttgaggaagcatttaggtttcaggaagccacgactgggtgtttctgcctgtatagattcccattccctagtgtg  
tacaggtactgtattttatctgaggc-----ca-----

>IL14H\_AY107827

gcagttccagtcctcaaaacaattgagcatgctgagataggggtgattctattgacatctcttaggctgtcatatttattgggt  
tgagtgatatgctattatgttaacttgatgacgtgaggcttgggtgttcgggtattccgtgt-----  
ggagcatttgaggaagcatttaggtttcaggaagccacgactgggtgtttctgcctgtatagattcccattccctagtgtg  
tacaggtactgtattttatctgaggc-----

>Mo17\_AY107827

gcagttccagtcctcaaaacaattgagcatgctgagataggggtgattctattgacatctcttaggctgtcatatttattgggt  
tgagtgatatgctattatgttaacttgatgacgtgaggcttgggtgttcgggtattccgtgt-----  
ggagcatttgaggaagcatttaggtttcaggaagccacgactgggtgtttctgcctgtatagattcccattccctagtgtg  
tacaggtactgtattttatctgaggc-----ca-----

>M37W\_AY107827

-----  
aaacaattgagcatgctgagataggggtgattctattgacatctcttaggctgtcatatatttattgggtgagtgatgcta  
ttatgttaacttgatgacgtgaggcttgggtgttcgggtattccgtgt-----  
ggagcatttgaggaagcatttaggtttcaggaagccacgactgggtgtttctgcctgtatagattcccattccctagtgtg  
tacaggtactgtatatttatctgagg-----

>HP301\_AY107827

gcagttccagtcctcaaaacaattgagcatgctgagataggggtgattctattgacatctcttaggctgtcatatatttattgggt  
tgagtgatgctatattatgttaacttgatgacgtgaggcttgggtgttcgggtattccgtgt-----  
ggagcatttgaggaagcatttaggtttcaggaagccacgactgggtgtttctgcctgtatagattcccattccctagtgtg  
tacaggtactgtatatttatctgaggc-----cagataacatgtgt

>CML247\_AY107827

gcagttccagtcctcaaaacaattgagcatgctgagataggggtgattctattgacatctcttaggctgtcatatatttattgggt  
tgagtgatgctatattatgttaacttgatgacgtgaggcttgggtgttcgggtattccgtgt-----  
ggagcatttgaggaagcatttaggtttcaggaagccacgactgggtgtttctgcctgtatagattcccattccctagtgtg  
tacaggtactgtatatttatctgaggc-----ca-----

>NC350\_AY107827

gcagttccagtcctcaaaacaattgagcatgctgagataggggtgattctattgacatctcttaggctgtcatatatttattgggt  
tgagtgatgctatattatgttaacttgatgacgtgaggcttgggtgttcgggtattccgtgt-----  
ggagcatttgaggaagcatttaggtttcaggaagccacgactgggtgtttctgcctgtatagattcccattccctagtgtg  
tacaggtactgtatatttatctgaggc-----cagataacatgtgt

>Ki3\_AY107827

gcagttccagtcctcaaaacaattgagcatgctgagataggggtgattctattgacatctcttaggctgtcatatatttattgggt  
tgagtgatgctatattatgttaacttgatgacgtgaggcttgggtgttcgggtattccgtgt-----  
ggagcatttgaggaagcatttaggtttcaggaagccacgactgggtgtttctgcctgtatagattcccattccctagtgtg  
tacaggtactgtatatttatctgaggc-----cagataacatgtgt

>Ki11\_AY107827

gcagttccagtcctcaaaacaattgagcatgctgagataggggtgattctattgacatctcttaggctgtcatatatttattgggt  
tgagtgatgctatattatgttaacttgatgacgtgaggcttgggtgttcgggtattccgtgt-----  
ggagcatttgaggaagcatttaggtttcaggaagccacgactgggtgtttctgcctgtatagattcccattccctagtgtg  
tacaggtactgtatatttatctgaggc-----ca-----

>CML333\_AY107827

gcagttccagtcctcaaaacaattgagcatgctgagataggggtgattctattgacatctcttaggctgtcatatatttattgggt  
tgagtgatgctatattatgttaacttgatgacgtgaggcttgggtgttcgggtattccgtgt-----  
ggagcatttgaggaagcatttaggtttcaggaagccacgactgggtgtttctgcctgtatagattcccattccctagtgtg  
tacaggtactgtatatttatctgaggc-----cagataacatgtg-

>CML322\_AY107827

gcagttccagtcctcaaaacaattgagcatgctgagataggggtgattctattgacatctcttaggctgtcatatatttattgggt  
tgagtgatgctatattatgttaacttgatgacgtgaggcttgggtgttcgggtattccgtgt-----  
ggagcatttgaggaagcatttaggtttcaggaagccacgactgggtgtttctgcctgtatagattcccattccctagtgtg  
tacaggtactgtatatttatctgaggc-----cagata-----

>CML69\_AY107827

gcagttccagtcctcaaaacaattgagcatgctgagataggggtgattctattgacatctcttaggctgtcatatatttattgggt  
tgagtgatgctatattatgttaacttgatgacgtgaggcttgggtgttcgggtattccgtgt-----  
ggagcatttgaggaagcatttaggtttcaggaagccacgactgggtgtttctgcctgtatagattcccattccctagtgtg  
tacaggtactgtatatttatctgaggc-----cagataacatgtgt

>Assinboine\_PI213793\_AY107827

gcagttccagtcctcaaaacaattgagcatgctgagataggggtgattctattgacatctcttaggctgtcatatatttattgggt  
tgagtgatgctatattatgttaacttgatgacgtgaggcttgggtgttcgggtattccgtgt-----  
ggagcatttgaggaagcatttaggtttcaggaagccacgactgggtgtttctgcctgtatagattcccattccctagtgtg  
tacaggtactgtatatttatctgaggc-----cagataacatgtgt

>Gordo\_CHH\_160\_AY107827

gcagttccagtcctcaaaacaattgagcatgctgagataggggtgattctattgacatctcttaggctgtcatatatttattgggt  
tgagtgatgctatattatgttaacttgatgacgtgaggcttgggtgttcgggtattccgtgt-----  
ggagcatttgaggaagcatttaggtttcaggaagccacgactgggtgtttctgcctgtatagattcccattccctagtgtg  
tacaggtactgtatatttatctgaggc-----cagataacatgtgt

>Guirua\_MAG\_450\_AY107827

-----  
tgagcatgctgagataggggtgattctattgacatctcttaggctgtcatatatttggttgagtgatatgctattatggt  
aacttgatgacgtgaggcttgggtgttcgggtattccgtgt-----  
ggagcatttgaggaagcatttaggtttcaggaagccacgactgggtgtttctgcctgtatagattcccattccctagtgtg  
tacaggtactgtattttatctgagggc-----cagataacatgtgt  
>Nal-tel\_YUC 7\_AY107827  
gcagttccagtcctcaaaacaattgagcatgctgagataggggtgattctattgacatctcttaggctgtcatatatttggt  
tgagtgatatgctattatgttaacttgatgacgtgaggcttgggtgttcgggtattccgtgt-----  
ggagcatttgaggaagcatttaggtttcaggaagccacgactgggtgtttctgcctgtatagattcccattccctagtgtg  
tacaggtactgtattttatctgagggc-----cagataacatgtgt  
>Pisscotunto\_APC 13\_AY107827  
gcagttccagtcctcaaaacaattgagcatgctgagataggggtgattctattgacatctcttaggctgtcatatatttggt  
tgagtgatatgctattatgttaacttgatgacgtgaggcttgggtgttcgggtattccgtgt-----  
ggagcatttgaggaagcatttaggtttcaggaagccacgactgggtgtttctgcctgtatagattcccattccctagtgtg  
tacaggtactgtattttatctgagggc-----cagataacatgtgt  
>Sabanero\_SAN 329\_AY107827  
gcagttccagtcctcaaaacaattgagcatgctgagataggggtgattctattgacatctcttaggctgtcatatatttggt  
tgagtgatatgctattatgttaacttgatgacgtgaggcttgggtgttcgggtattccgtgt-----  
ggagcatttgaggaagcatttaggtttcaggaagccacgactgggtgtttctgcctgtatagattcccattccctagtgtg  
tacaggtactgtattttatctgagggc-----cagataacatgtgt  
>Zapalote\_Chico\_OAX 70\_AY107827  
gcagttccagtcctcaaaacaattgagcatgctgagataggggtgattctattgacatctcttaggctgtcatatatttggt  
tgagtgatatgctattatgttaacttgatgacgtgaggcttgggtgttcgggtattccgtgt-----  
ggagcatttgaggaagcatttaggtttcaggaagccacgactgggtgtttctgcctgtatagattcccattccctagtgtg  
tacaggtactgtattttatctgagggc-----cagataacatgtgt  
>Bolita\_OAX 68\_AY107827  
gcagttccagtcctcaaaacaattgagcatgctgagataggggtgattctattgacatctcttaggctgtcatatatttggt  
tgagtgatatgctattatgttaacttgatgacgtgaggcttgggtgttcgggtattccgtgt-----  
ggagcatttgaggaagcatttaggtttcaggaagccacgactgggtgtttctgcctgtatagattcccattccctagtgtg  
tacaggtactgtattttatctgagggc-----cagataacatgtgt  
>Cateto\_Sulino\_URG 11\_AY107827  
gcagttccagtcctcaaaacaattgagcatgctgagataggggtgattctattgacatctcttaggctgtcatatatttggt  
tgagtgatatgctattatgttaacttgatgacgtgaggcttgggtgttcgggtattccgtgt-----  
ggagcatttgaggaagcatttaggtttcaggaagccacgactgggtgtttctgcctgtatagattcccattccctagtgtg  
tacaggtactgtattttatctgagggc-----cagataacatgtgt  
>Chalqueno\_MEX 48\_AY107827  
acagttccagtcctcaaaacagttgagcatgctgagataggggtgattctattgacatctcttaggctgtcatatatttcgt  
tgagtgatatgctattatgttaaccttgatgacgtgaggcttgggtgttcgggtattccctgt-----  
ggagcatttgaggaagcatttaggtttcaggaagccacgactgggtgtttctgcctgtatagattcccattccctagtgtg  
tacaggtactgtattttatctgagggc-----cagataacatgtgt  
>Chapalote\_SIN 2\_AY107827  
gcagttccagtcctcaaaacaattgagcatgctgagataggggtgattctattgacatctcttaggctgtcatatatttggt  
tgagtgatatgctattatgttaacttgatgacgtgaggcttgggtgttcgggtattccgtgt-----  
ggagcatttgaggaagcatttaggtttcaggaagccacgactgggtgtttctgcctgtatagattcccattccctagtgtg  
tacaggtactgtattttatctgagggc-----cagataacatgtgt  
>Costeno\_VEN 453\_AY107827  
gcagttccagtcctcaaaacaattgagcatgctgagataggggtgattctattgacatctcttaggctgtcatatatttggt  
tgagtgatatgctattatgttaacttgatgacgtgaggcttgggtgttcgggtattccgtgt-----  
ggagcatttgaggaagcatttaggtttcaggaagccacgactgggtgtttctgcctgtatagattcccattccctagtgtg  
tacaggtactgtattttatctgagggc-----cagataacatgtgt  
>Dzit\_Bacal\_GUA 131\_AY107827  
gcagttccagtcctcaaaacaattgagcatgctgagataggggtgattctattgacatctcttaggctgtcatatatttggt  
tgagtgatatgctattatgttaacttgatgacgtgaggcttgggtgttcgggtattccgtgt-----  
ggagcatttgaggaagcatttaggtttcaggaagccacgactgggtgtttctgcctgtatagattcccattccctagtgtg  
tacaggtactgtattttatctgagggc-----cagataacatgtgt  
>Jalisco\_Benz 967\_AY107827  
acagttccagtcctcaaaacagttgagcatgctgagataggggtgattctattgacatctcttaggctgtcatatatttcgt



tgagtgatatgctattatgttaacctgtagacgtgaggcttgggtgttcgggtattccggtg-----  
ggagcatttgaggaagcatttaggtttcaggaagccacgactgggtgtttctgcctgtagatattcccattccctagtgtg  
tacaggtactgtattttatctgaggc-----cagataacatgtgt  
>Balsas\_Beadle & Kato Site 4\_AY107827  
gcagttccagtcctaaaacagttgagcatgctgagataggggtgattctattgacatctcttaggctgtcatatatttattcgt  
tgagtgatatgctattatgttaacctgtagacgtgaggcttgggtgttcgggtattccggtgtggagcactggggagcattt  
gaggaagcatttaggtttcaggaagccacgactgggtgtttctgcctgtagatattcccattccctagtgtgtacaggtac  
tgtattttatctgaggc-----cagataacatgtgt  
>Balsas\_Kato Site 4\_AY107827  
gcagttccagtcctaaaacagttgagcatgctgagataggggtgattctattgacatctcttaggctgtcatatatttattcgt  
tgagtgatatgctattatgttaacctgtagacgtgaggcttgggtgttcgggtattccggtgtggagcactggggagcattt  
gaggaagcatttaggtttcaggaagccacgactgggtgtttctgcctgtagatattcccattccctagtgtgtacaggtac  
tgtattttatctgaggc-----cagataacatgtgt  
>Balsas\_Wilkes Site 6\_AY107827  
gcagttccagtcctaaaacaattgagcatgctgagataggggtgattctattgacatctcttaggctgtcatatatttattggt  
tgagtgatatgctattatgttaacctgtagacgtgaggcttgggtgttcgggtattccggtg-----  
ggagcatttgaggaagcatttaggtttcaggaagccacgactgggtgtttctgcctgtagatattcccattccctagtgtg  
tacaggtactgtattttatctgaggc-----cagataacatgtgt  
>Balsas\_INIFAP JSP y Lo5130\_AY107827  
acagttccagtcctaaaacagttgagcatgctgagataggggtgattctattgacatctcttaggctgtcatatatttattcgt  
tgagtgatatgctattatgttaacctgtagacgtgaggcttgggtgttcgggtattccggtg-----  
ggagcatttgaggaagcatttaggtttcaggaagccacgactgggtgtttctgcctgtagatattcccattccctagtgtg  
tacaggtactgtattttatctgaggc-----cagataacatgtgt  
>Balsas\_INIFAP JSG y LOS 119\_AY107827  
acagttccagtcctaaaacagttgagcatgctgagataggggtgattctattgacatctcttaggctgtcatatatttattcgt  
tgagtgatatgctattatgttaacctgtagacgtgaggcttgggtgttcgggtattccggtg-----  
ggagcatttgaggaagcatttaggtttcaggaagccacgactgggtgtttctgcctgtagatattcccattccctagtgtg  
tacaggtactgtattttatctgaggc-----cagataacatgtgt  
>Jalisco\_INIFAP JSG y MAS 401\_AY107827  
acagttccagtcctaaaacagttgagcatgctgagataggggtgattctattgacatctcttaggctgtcatatatttattcgt  
tgagtgatatgctattatgttaacctgtagacgtgaggcttgggtgttcgggtattccggtg-----  
ggagcatttgaggaagcatttaggtttcaggaagccacgactgggtgtttctgcctgtagatattcccattccctagtgtg  
tacaggtactgtattttatctgaggc-----cagataacatgtgt  
>Balsas\_CIMMYT 8783\_AY107827  
gcagttccagtcctaaaacagttgagcatgctgagataggggtgggttctattgacatctcttaggctgtcatatatttattcgt  
tgagtgatatgctattatgttaacctgtagacgtgaggcttgggtgttcgggtattccggtgtggagcactggggagcattt  
gaggaagcatttaggtttcaggaagccacgactgggtgtttctgcctgtagatattcccattccctagtgtgtacaggtac  
tgtattttatctgaggc-----cagataacatgtgt  
>Balsas\_INIFAP JSG y LOS 109\_AY107827  
acagttccagtcctaaaacagttgagcatgctgagataggggtgattctattgacatctcttaggctgtcatatatttattcgt  
tgagtgatatgctattatgttaacctgtagacgtgaggcttgggtgttcgggtattccggtg-----  
ggagcatttgaggaagcatttaggtttcaggaagccacgactgggtgtttctgcctgtagatattcccattccctagtgtg  
tacaggtactgtattttatctgaggc-----cagataacatgtgt  
>Balsas\_INIFAP JSG 378\_AY107827  
acagttccagtcctaaaacagttgagcatgctgagataggggtgattctattgacatctcttaggctgtcatatatttattcgt  
tgagtgatatgctattatgttaacctgtagacgtgaggcttgggtgttcgggtattccggtg-----  
ggagcatttgaggaagcatttaggtttcaggaagccacgactgggtgtttctgcctgtagatattcccattccctagtgtg  
tacaggtactgtattttatctgaggc-----cagataacatgtgt  
>Balsas\_INIFAP JSG 374\_AY107827  
gcagttccagtcctaaaacaattgagcatgctgagataggggtgattctattgacatctcttaggctgtcatatatttattggt  
tgagtgatatgctattatgttaacctgtagacgtgaggcttgggtgttcgggtattccggtg-----  
ggagcatttgaggaagcatttaggtttcaggaagccacgactgggtgtttctgcctgtagatattcccattccctagtgtg  
tacaggtactgtattttatctgaggc-----cagataacatgtgt  
>Balsas\_INIFAP JSG y LOS 161\_AY107827  
acagttccagtcctaaaacagttgagcatgctgagataggggtgattctattgacatctcttaggctgtcatatatttattcgt  
tgagtgatatgctattatgttaacctgtagacgtgaggcttgggtgttcgggtattccggtg-----  
ggagcatttgaggaagcatttaggtttcaggaagccacgactgggtgtttctgcctgtagatattcccattccctagtgtg

tacaggtactgtatTTTTatctgagggc-----cagataacatgtgt  
>Balsas\_CIMMYT\_11355\_AY107827  
gcagttccagtcctcaaacagttgagcatgctgagataggggtgattctattgacatctcttaggctgtcatatTTTattcgt  
tgagtgatatgctattatgttaacctgtatgacgtgaggcttggtgttcggtattccggtgtggagcactggggagcattt  
gaggaagcattaggtttcaggaagccacgactgggtgtttctgcctgtatagattcccatccctagtgtgtacaggtac  
tgtatTTTTatctgagggc-----cagataacatgtgt  
>Balsas\_USDA\_PI566686\_AY107827  
gcagttccagtcctcaaacagttgagcatgctgagataggggtgattctattgacatctcttaggctgtcatatTTTattcgt  
tgagtgatatgctattatgttaacctgtatgacgtgaggcttggtgttcggtattccggtgtggagcactggggagcattt  
gaggaagcattaggtttcaggaagccacgactgggtgtttctgcctgtatagattcccatccctagtgtgtacaggtac  
tgtatTTTTatctgagggc-----cagataacatgtgt  
>Tripsacum\_WW-2120\_AY107827  
gcagttccagtcctcaaacagttgagcat-----aggggtgattcgattgacatc--  
ttagggtgtcgtatTTTatttggttgagtgatatgctattatgttaacctgtatgaggtgaggcttggtgttcggtattccg  
tgtggagcactggggaacatttgaggaagcattaggtt-  
caggaagccacgactgggtcgtttctgcctgtatagattcccatccctagtgtgtacaggtactgtatTTTTatctgagggc  
tcagcaacaaggagaccagataacatgtgt

>B73\_AY107821  
gtgtcagcgactatggtgtgaacaatgcaacctgcctgtcaccgctcgtcaagtcaacaagcaccgaaggttgatcttat  
cgccgagatgcctggatgtgatggttgaataaaga---  
tggttggcctgatgaagaacatgcactagtttctagctatTTTgaaacatggttgaacgaggcaattcctaatgtaataata  
tagacaaagtgccttatga-----aggacatgggtg----aca-----tgcc----ttt-  
gttgctgtatgagtgtatggtt-  
>Oh43\_AY107821

gtgtcagcgactatggtgtgaacaatgcaacctgcctgtcaccgctcgtcaagtcaacaagcaccgaaggttgatcttat  
cgccgagatgcctggatgtgatggttgaataaaga---  
tggttggcctgatgaagaacatgcactagtttctagctatTTTgaaacatggttgaacgaggcaattcctaatgtaataata  
tagacaaagtgccttatga-----aggacatgggtg----aca-----tgcc----ttt-  
gttgctgtatgagtgtatggtt-  
>IL14H\_AY107821

-----  
cagcgactatggtgtgaacaatgcaacctgcctgtcaccgctcgtcaagtcaacaagcaccgaaggttgatcttatcgcc  
gagatgcctggatgtgatggttgaataaaga---  
tggttggcctgatgaagaacatgcactagtttctagctatTTTgaaacatggttgaacgaggcaattcctaatgtaataata  
tagacaaagtgccttatga-----aggacatgggtg----aca-----tgcc----ttt-  
gttgctgtatgagtgtatggtt-  
>Mo17\_AY107821

gtgtcagcgactatggtgtgaacaatgcaacctgcctgtcaccgctcgtcaagtcaacaagcaccgaaggttgatcttat  
cgccgagatgcctggatgtgatggttgaataaaga---  
tggttggcctgatgaagaacatgcactagtttctagctatTTTgaaacatggttgaacgaggcaattcctaatgtaataata  
tagacaaagtgccttatga-----aggacatgggtg----aca-----tgcc----ttt-  
gttgctgtatgagtgtatggtt-  
>Ky21\_AY107821

-----  
atggtgtgaacaatgcaacctgcctgtcaccgctcgtcaagtcaacaagcaccgaaggttgatcttatcgccgagatgcc  
tggtatgtgatggttgaataaaga---  
tggttggcctgatgaagaacatgcactagtttctagctatTTTgaaacatggttgaacgaggcaattcctaatgtaataata  
tagacaaagtgccttatga-----aggacatgggtg----aca-----tgcc----ttt-  
gttgctgtatgagtgt-----  
>M37W\_AY107821

-----  
tgtgaacaatgcaacctgcctgtcaccgctcgtcaagtcaacaagcaccgaaggttgatcttatcgccgagatgcctgga  
tgtgatggttgaataaaga---  
tggttggcctgatgaagaacatgcactagtttctagctatTTTgaaacatggttgaacgaggcaattcctaatgtaataata

tagacaaagtgccttatga-----aggacatgggtg----aca-----tgcc----ttt-  
gttgctgtatgagtgatggtt-  
>HP301\_AY107821

-----  
tggtgtgaacaatgcaacctgccctgtcaccgtcgtcaagtcaacaagcaccgaaggttgatccttatcgccgagatgcct  
ggatgtgatggttgaataaaga---  
tggttggcctgatgaagaacatgcactagtttctagctatgttgaacatggttgaacgaggcaattcctaatgtaataataa  
tagacaaagtgccttatga-----aggacatgggtg----aca-----tgcc----ttt-  
gttgctgtatgagtgatggtt-  
>CML247\_AY107821

gtgtcagcgactatggtgtgaacaatgcaacctgccctgtcaccgtcgtcaagtcaacaagcaccgaaggttgatccttat  
cgccgagatgcctggatgtgatggttgaataaaga---  
tggttggcctgatgaagaacatgcactagtttctagctatgttgaacatggttgaacgaggcaattcctaatgtaataataa  
tagacaaagtgccttatga-----aggacatgggtg----aca-----tgcc----ttt-  
gttgctgtatgagtgatggtt-  
>NC350\_AY107821

-----  
atggtgtgaacaatgcaacctgccctgtcaccgtcgtcaagtcaacaagcaccgaaggttgatccttatcgccgagatgcc  
tggatgtgatggttgaataaaga---  
tggttggcctgatgaagaacatgcactagtttctagctatgttgaacatggttgaacgaggcaattcctaatgtaataataa  
tagacaaagtgccttatga-----aggacatgggtg----aca-----tgcc----ttt-  
gttgctgtatgag-----  
>Ki3\_AY107821

gtgtcagcgactatggtgtgaacaatgcaacctgccctgtcaccgtcgtcaagtcaacaagcaccgaaggttgatccttat  
cgccgagatgcctggatgtgatggttgaataaaga---  
tggttggcctgatgaagaacatgcactagtttctagctatgttgaacatggttgaacgaggcaattcctaatgtaataataa  
tagacaaagtgccttatga-----aggacatgggtg----aca-----tgcc----ttt-  
gttgctgt-----  
>Ki11\_AY107821

-----  
atggtgtgaacaatgcaacctgccctgtcaccgtcgtcaagtcaacaagcaccgaaggttgatccttatcgccgagatgcc  
tggatgtgatggttgaataaaga---  
tggttggcctgatgaagaacatgcactagtttctagctatgttgaacatggttgaacgaggcaattcctaatgtaataataa  
tagacaaagtgccttatga-----aggacatgggtg----aca-----tgcc----ttt-  
gttgctgtatgagtgatggtt-  
>CML333\_AY107821

-----  
tgtgaacaatgcaacctgccctgtcaccgtcgtcaagtcaacaagcaccgaaggttgatccttatcgccgagatgcctgga  
tgtgatggttgaataaaga---  
tggttggcctgatgaagaacatgcactagtttctagctatgttgaacatggttgaacgaggcaattcctaatgtaataataa  
tagacaaagtgccttatga-----aggacatgggtg----aca-----tgcc----ttt-  
gttgctgtatgagtgatggtt-  
>CML322\_AY107821

-----  
atggtgtgaacaatgcaacctgccctgtcaccgtcgtcaagtcaacaagcaccgaaggttgatccttatcgccgagatgcc  
tggatgtgatggttgaataaaga---  
tggttggcctgatgaagaacatgcactagtttctagctatgttgaacatggttgaacgaggcaattcctaatgtaataataa  
tagacaaagtgccttatga-----aggacatgggtg----aca-----tgcc----ttt-  
gttgctgt-----  
>CML69\_AY107821

-----  
tatggtgtgaacaatgcaacctgccctgtcaccgtcgtcaagtcaacaagcaccgaaggttgatccttatcgccgagatgc  
ctggatgtgatggttgaataaaga---  
tggttggcctgatgaagaacatgcactagtttctagctatgttgaacatggttgaacgaggcaattcctaatgtaataataa  
tagacaaagtgccttatga-----aggacatgggtg----aca-----tgcc----ttt-  
gttgctgtatgagtgatggtt-  
>Assinboine\_PI213793\_AY107821

gtgtcagcgactatggttgaacaatgcaacctgccctgtcaccgctcgtcaagtcaacaagcaccgaaggtgatcttat  
cgccgagatgcctggatgtgatggttgaataaaga---  
tggttggcctgatgaagaacatgcactagtttctagctatgttgaacaatggttgaacgaggcaattctaataataataa  
tagacaaagtgccttatga-----aggacatggttg----aca-----tgcc----ttt-  
gttgctgtatgagtgatgttta  
>Gordo\_CHH 160\_AY107821  
gtgtcagcgactatggttgaacaatgcaacctgccctgtcaccgctcgtcaagtcaacaagcaccgaaggtgatcttat  
cgccgagatgcctggatgtgatggttgaataaaga---  
tggttggcctgatgaagaacatgcactagtttctagctatgttgaacaatggttgaacgaggcaattctaataataataa  
tagacaaagtgccttatga-----aggacatggttg----aca-----tgcc----ttt-  
gttgctgtatgagtgatgttta  
>Guirua\_MAG 450\_AY107821  
gtgtcagcgactatggttgaacaatgcaacctgccctgtcaccgctcgtcaagtcaacaagcaccgaaggtgatcttat  
cgccgagatgcctggatgtgatggttgaataaaga---  
tggttggcctgatgaagaacatgcactagtttctagctatgttgaacaatggttgaacgaggcaattctaataataataa  
tagacaaagtgccttatga-----aggacatggttg----aca-----tgcc----ttt-  
gttgctgtatgagtgatgttta  
>Nal-tel\_YUC 7\_AY107821  
gtgtcagcgaatatggttgaacaatgcaacctgccctgtcaccgctcgtcaagtcaacaagcaccgaaggtgatcttat  
cgccgagatgcctggatgtgatggttgaataaaga---  
tggttggcctgatgaagaacatgcactagtttctagctatgttgaacaatggttgaacgaggcaattctaataataataa  
tagacaaagtgccttatga-----aggacatggttg----aca-----tgcc----ttt-  
gttgctgtatgagtgatgttta  
>Pisscotunto\_APC 13\_AY107821  
gtgtcagcgactatggttgaacaatgcaacctgccctgtcaccgctcgtcaagtcaacaagcaccgaaggtgatcttat  
cgccgagatgcctggatgtgatggttgaataaaga---  
tggttggcctgatgaagaacatgcactagtttctagctatgttgaacaatggttgaacgaggcaattctaataataataa  
tagacaaagtgccttatga-----aggacatggttg----aca-----tgcc----ttt-  
gttgctgtatgagtgatgttta  
>Sabanero\_SAN 329\_AY107821  
gtgtcagcgactatggttgaacaatgcaacctgccctgtcaccgctcgtcaagtcaacaagcaccgaaggtgatcttat  
cgccgagatgcctggatgtgatggttgaataaaga---  
tggttggcctgatgaagaacatgcactagtttctagctatgttgaacaatggttgaacgaggcaattctaataataataa  
tagacaaagtgccttatga-----aggacatggttg----aca-----tgcc----ttt-  
gttgctgtatgagtgatgttta  
>Serrano\_GUA 14\_AY107821  
gtgtcagcgactatggttgaacaatgcaacctgccctgtcaccgctcgtcaagtcaacaagcaccgaaggtgatcttat  
cgccgagatgcctggatgtgatggttgaataaaga---  
tggttggcctgatgaagaacatgcactagtttctagctatgttgaacaatggttgaacgaggcaattctaataataataa  
tagacaaagtgccttatga-----aggacatggttg----aca-----tgcc----ttt-  
gttgctgtatgagtgatgttta  
>Zapalote Chico\_OAX 70\_AY107821  
gtgtcagcgactatggttgaacaatgcaacctgccctgtcaccgctcgtcaagtcaacaagcaccgaaggtgatcttat  
cgccgagatgcctggatgtgatggttgaataaaga---  
tggttggcctgatgaagaacatgcactagtttctagctatgttgaacaatggttgaacgaggcaattctaataataataa  
tagacaaagtgccttatga-----aggacatggttg----aca-----tgcc----ttt-  
gttgctgtatgagtgatgttta  
>Bolita\_OAX 68\_AY107821  
gtgtcagcgactatggttgaacaatgcaacctgccctgtcaccgctcgtcaagtcaacaagcaccgaaggtgatcttat  
cgccgagatgcctggatgtgatggttgaataaaga---  
tggttggcctgatgaagaacatgcactagtttctagctatgttgaacaatggttgaacgaggcaattctaataataataa  
tagacaaagtgccttatga-----aggacatggttg----aca-----tgcc----ttt-  
gttgctgtatgagtgatgttta  
>Cateto Sulino\_URG 11\_AY107821  
gtgtcagcgactatggttgaacaatgcaacctgccctgtcaccgctcgtcaagtcaacaagcaccgaaggtgatcttat  
cgccgagatgcctggatgtgatggttgaataaaga---  
tggttggcctgatgaagaacatgcactagtttctagctatgttgaacaatggttgaacgaggcaattctaataataataa

tagacaaagtgccttatga-----aggacatgggtg----aca-----tgcc----ttt-  
gttgctgtatgagtgatgttta  
>Chalqueno\_MEX 48\_AY107821  
gtgtcagcgactatgtcgtgaacaatgcaacctgccctgtcaccgctcgtcaagtcaacaagcaccgaaggttgatcctat  
cgccgagatgcctggatgtgctggtgtaataaagaagatgggtggcctgatgaagaacatgcactagtttctagctat  
gaaacatggtgaacgaggcaattcctaataataatagacaaagtgccttatga-----aggacatgggtg----  
aca-----tgcc----ttt-gttgctgtatgagtgat-----  
>Chapalote\_SIN 2\_AY107821  
gtgtcagcgactatgttgtgaacaatgcaacctgccctgtcaccgctcgtcaagtcaacaagcaccgaaggttgatcctat  
cgccgagatgcctggatgtgatggtgtaataaaga---  
tggttggcctgatgaagaacatgcactagtttctagctatgaaacatggtgaacgaggcaattcctaataataa  
tagacaaagtgccttatga-----aggacatgggtg----aca-----tgcc----ttt-  
gttgctgtatgagtgatgttta  
>Conico\_PUE 32\_AY107821  
gtgtcagcgactatgttgtgaacaatgcaacctgccctgtcaccgctcgtcaagtcaacaagcaccgaaggttgatcctat  
cgccgagatgcctggatgtgatggtgtaataaaga---  
tggttggcctgatgaagaacatgcactagtttctagctatgaaacatggtgaacgaggcaattcctaataataa  
tagacaaagtgccttatga-----aggacatgggtg----aca-----tgcc----ttt-  
gttgctgtatgagtgatgttta  
>Costeno\_VEN 453\_AY107821  
gtgtcagcgactatgttgtgaacaatgcaacctgccctgtcaccgctcgtcaagtcaacaagcaccgaaggttgatcctat  
cgccgagatgcctggatgtgatggtgtaataaaga---  
tggttggcctgatgaagaacatgcactagtttctagctatgaaacatggtgaacgaggcaattcctaataataa  
tagacaaagtgccttatga-----aggacatgggtg----aca-----tgcc----ttt-  
gttgctgtatgagtgatgttta  
>Cristalino Norteno\_CHI 349\_AY107821  
gtgtcagcgactatgttgtgaacaatgcaacctgccctgtcaccgctcgtcaagtcaacaagcaccgaaggttgatcctat  
cgccgagatgcctggatgtgatggtgtaataaaga---  
tggttggcctgatgaagaacatgcactagtttctagctatgaaacatggtgaacgaggcaattcctaataataa  
tagacaaagtgccttatga-----aggacatgggtg----aca-----tgcc----ttt-  
gttgctgtatgagtgatgttta  
>Dzit Bacal\_GUA 131\_AY107821  
gtgtcagcgactatgttgtgaacaatgcaacctgccctgtcaccgctcgtcaagtcaacaagcaccgaaggttgatcctat  
cgccgagatgcctggatgtgatggtgtaataaaga---  
tggttggcctgatgaagaacatgcactagtttctagctatgaaacatggtgaacgaggcaattcctaataataa  
tagacaaagtgccttatga-----aggacatgggtg----aca-----tgcc----ttt-  
gttgctgtatgagtgatgttta  
>Balsas\_Beadle & Kato Site 4\_AY107821  
gtgtcagcgactatgtcgtgaacaatgcaacctgccctgtcaccgctcgtcaagtcaacaagcaccgaaggttgatcctat  
cgccgagatgcctggatgtgctggtgtaataaaga---  
tggttggcctgatgaagaacatgcactagtttctagctatgaaacatggtgaacgaggcaattcctaataataa  
tagacaaagtgccttatga-----aggacatgggtg----aca-----tgcc----ttt-  
gttgctgtatgagtgatgttta  
>Balsas\_Kato Site 4\_AY107821  
gtgtcagcgactatgttgtgaacaatgcaacctgccctgtcaccgctcgtcaagtcaacaagcaccgaaggttgatcctat  
cgccgagatgcctggatgtgatggtgtaataaaga---  
tggttggcctgatgaagaacatgcactagtttctagctatgaaacatggtgaacgaggcaattcctaataataa  
tagacaaagtgccttatga-----aggacatgggtg----aca-----tgcc----ttt-  
gttgctgtatgagtgatgttta  
>Balsas\_Wilkes Site 6\_AY107821  
gtgtcagcgactatgttgtgaacaatgcaacctgccctgtcaccgctcgtcaagtcaacaagcaccgaaggttgatcctat  
cgccgagatgcctggatgtgatggtgtaataaaga---  
tggttggcctgatgaagaacatgcactagtttctagctatgaaacatggtgaacgaggcaattcctaataataa  
tagacaaagtgccttatga-----aggacatgggtg----aca-----tgcc----ttt-  
gttgctgtatgagtgatgttta  
>Balsas\_INIFAP JSP y Lo5130\_AY107821  
gtgtcagcgactatgtcgtgaacaatgcaacctgccctgtcaccgctcgtcaagtcaacaagcaccgaaggttgatcctat

caccgagatgcctggatgtgctggttgaataaaga---  
tggttggcctgatgaagaacatgcactagtttctagctatgttgaacaatggttgaacgaggcaattctaataataataa  
tagacaaagtgccttatga-----aggacatggttg----aca-----tgcc----ttt-  
gttgcctgatgagtgatgttta  
>Balsas\_INIFAP JSG y LOS 119\_AY107821  
gtgtcagcgactatgtcgtgaacaatgcaacctgccctgtcaccgctcgtcaagtcaacaagcaccgaaggttgatcctat  
caccgagatgcctggatgtgctggttgaataaaga---  
tggttggcctgatgaagaacatgcactagtttctagctatgttgaacaatggttgaacgaggcaattctaataataataa  
tagacaaagtgccttatga-----aggacatggttg----aca-----tgcc----ttt-  
gttgcctgatgagtgatgttta  
>Jalisco\_INIFAP JSG y MAS 401\_AY107821  
gtgtcagcgactatgtcgtgaacaatgcaacctgccctgtcaccgctcgtcaagtcaacaagcaccgaaggttgatcctat  
cgccgagatgcctggatgtgctggttgaataaagaagatgggtggcctgatgaagaacatgcactagtttctagctatgtt  
gaaacatggttgaacgaggcaattctaataataataatagacaaagtgccttatga-----aggacatggttg----  
aca-----tgcc----ttt-gttgcctgatgagtgatgttta  
>Oaxaca\_INIFAP JSG 197\_AY107821  
gtgtcagcgactatgttgtgaacaatgcaacctgccctgtcaccgctcgtcaagtcaacaagcaccgaaggttgatcctat  
cgccgagatgcctggatgtgctggttgaataaaga---  
tggttggcctgatgaagaacatgcactagtttctagctatgttgaacaatggttgaacgaggcaattctaataataataa  
tagacaaagtgccttatga-----aggacatggttg----aca-----tgcc----ttt-  
gttgcctgatgagtgatgttta  
>Balsas\_INIFAP JSG y LOS 109\_AY107821  
gtgtcagcgactatgtcgtgaacaatgcaacctgccctgtcaccgctcgtcaagtcaacaagcaccgaaggttgatcctat  
caccgagatgcctggatgtgctggttgaataaaga---  
tggttggcctgatgaagaacatgcactagtttctagctatgttgaacaatggttgaacgaggcaattctaataataataa  
tagacaaagtgccttatga-----aggacatggttg----aca-----tgcc----ttt-  
gttgcctgatgagtgatgttta  
>Balsas\_INIFAP JSG 378\_AY107821  
gtgtcagcgactatgtcgtgaacaatgcaacctgccctgtcaccgctcgtcaagtcaacaagcaccgaaggttgatcctat  
cgccgagatgcctggatgtgctggttgaataaagaagatgggtggcctgatgaagaacatgcactagtttctagctatgtt  
gaaacatggttgaacgaggcaattctaataataataatagacaaagtgccttatga-----aggacatggttg----  
aca-----tgcc----ttt-gttgcctgatgagtgatgttta  
>Balsas\_INIFAP JSG 374\_AY107821  
gtgtcagcgactatgtcgtgaacaatgcaacctgccctgtcaccgctcgtcaagtcaacaagcaccgaaggttgatcctat  
cgccgagatgcctggatgtgctggttgaataaaga---  
tggttggcctgatgaagaacatgcactagtttctagctatgttgaacaatggttgaacgaggcaattctaataataataa  
tagacaaagtgccttatga-----aggacatggttg----aca-----tgcc----ttt-  
gttgcctgatgagtgatgttta  
>Balsas\_INIFAP JSG y LOS 161\_AY107821  
gtgtcagcgactatgttgtgaacaatgcaacctgccctgtcaccgctcgtcaagtcaacaagcaccgaaggttgatcctat  
cgccgagatgcctggatgtgctggttgaataaaga---  
tggttggcctgatgaagaacatgcactagtttctagctatgttgaacaatggttgaacgaggcaattctaataataataa  
tagacaaagtgccttatga-----aggacatggttg----aca-----tgcc----ttt-  
gttgcctgatgagtgatgttta  
>Balsas\_CIMMYT 11355\_AY107821  
gtgtcagcgactatgttgtgaacaatgcaacctgccctgtcaccgctcgtcaagtcaacaagcaccgaaggttgatcctat  
cgccgagatgcctggatgtgctggttgaataaaga---  
tggttggcctgatgaagaacatgcactagtttctagctatgttgaacaatggttgaacgaggcaattctaataataataa  
tagacaaagtgccttatga-----aggacatggttg----aca-----tgcc----ttt-  
gttgcctgatgagtgatgttta  
>Balsas\_USDA PI566686\_AY107821  
gtgtcagcgactatgtcgtgaacaatgcaacctgccctgtcaccgctcgtcaagtcaacaagcaccgaaggttgatcctat  
cgccgagatgcctggatgtgctggttgaataaaga---  
tggttggcctgatgaagaacatgcactagtttctagctatgttgaacaatggttgaacgaggcaattctaataataataa  
tagacaaagtgccttatga-----aggacatggttg----aca-----tgcc----ttt-  
gttgcctgatgagtgatgttta  
>Jalisco\_INIFAP JSG y MAS 264\_AY107821

gtgtcagcgactatgtcgtgaacaatgcaacctgccctgtcaccgctcgtcaagtcaacaagcaccgaaggtgatcttat  
caccgagatgcctggatgtgctgttgaataaaga---  
tggttggcctgatgaagaacatgcactagtttctagctatgtgaaacatggtgaacgaggcaattctaataataa  
tagacaaagtgccttatga-----aggacatggttg----aca-----tgcc----ttt-  
gttgctgatgagtgatgttta  
>Tripsacum\_WW-2120\_\_AY107821  
gtgtcagcgactatgtcgtgaacaatgcaacctgccctgtcaccgctcgtcaagtcaacaagcaccgaaggtgatcttat  
caccgaaatgcctggatgtggtgtcataataaaga---  
tggttggcctgatgaagaacatgcactagtttctagctatgtgcaacatggtgaaccaggcagttctaataataa  
tagacaaagtaccttatgattcataaggacatggttatgtaataggactgttttcccagcagatgtgccatgcttttgt  
tgctgtacgagtgatgttta

>B73\_AY107949

caaggtttcagataggatcaattgatctatatgggaaaaccatataactcccc-  
ggagctgtgtttcacttttcggctttctgaactgctcgggtctcacgagcctgtgtagtatcataaattcataatattgta  
atgcgagcatttactgtggacgcaacgc-----tctcttcagatgaatagataactgaataattaaga-----  
gcatgatataatattgtttgcgcgcgcgattgagttctgaaatataagtga

>Oh43\_AY107949

caaggtttcagataggatcaattgatctatatgggaaaaccatataactcccc-  
ggagctgtgtttcacttttcggctttctgaactgctcgggtctcacgagcctgtgtagtatcataaattcataatattgta  
atgcgagcatttactgtggacgcaacgc-----tctcttcagatgaatagataactgaataattaaga-----  
gcatgatataatattgtttgcgcgcgcgattgagttctgaaatataagtga

>IL14H\_AY107949

caaggtttcagataggatcaattgatctatatgggaaaaccatataactcccc-  
ggagctgtgtttcacttttcggctttctgaactgctcgggtctcacgagcctgtgtagtatcataaattcataatattgta  
atgcgagcatttactgtggacgcaacgc-----tctcttcagatgaatagataactgaataattaaga-----  
gcatgatataatattgtttgcgcgcgcgattgagttctgaaatataagtga-

>Mo17\_AY107949

caaggtttcagataggatcaattgatctatatgggaaaaccatataactcccc-  
ggagctgtgtttcacttttcggctttctgaactgctcgggtctcacgagcctgtgtagtatcataaattcataatattgta  
atgcgagcatttactgtggacgcaacgc-----tctcttcagatgaatagataactgaataattaaga-----  
gcatgatataatattgtttgcgcgcgcgattgagttctgaaatataa-----

>Ky21\_AY107949

caaggtttcagataggatcaattgatctatatgggaaaaccatataactcccc-  
ggagctgtgtttcacttttcggctttctgaactgctcgggtctcacgagcctgtgtagtatcataaattcataatattgta  
atgcgagcatttactgtggacgcaacgc-----tctcttcagatgaatagataactgaataattaaga-----  
gcatgatataatattgtttgcgcgcgcgattgagttctgaaatataagtga-

>M37W\_AY107949

caaggtttcagataggatcaattgatctatatgggaaaaccatataactcccc-  
ggagctgtgtttcacttttcggctttctgaactgctcgggtctcacgagcctgtgtagtatcataaattcataatattgta  
atgcgagcatttactgtggacgcaacgc-----tctcttcagatgaatagataactgaataattaaga-----  
gcatgatataatattgtttgcgcgcgcgattg-----

>HP301\_AY107949

caaggtttcagataggatcaattgatctatatgggaaaaccatataactcccc-  
ggagctgtgtttcacttttcggctttctgaactgctcgggtctcacgagcctgtgtagtatcataaattcataatattgta  
atgcgagcatttactgtggacgcaacgc-----tctcttcagatgaatagataactgaataattaaga-----  
gcatgatataatattgtttgcgcgcgcgattgagttctgaaatataagtga-

>CML247\_AY107949

caaggtttcagataggatcaattgatctatatgggaaaaccatataactcccc-  
ggagctgtgtttcacttttcggctttctgaactgctcgggtctcacgagcctgtgtagtatcataaattcataatattgta  
atgcgagcatttactgtggacgcaacgc-----tctcttcagatgaatagataactgaataattaaga-----  
gcatgatataatattgtttgcgcgcgcgattgagttctgaaatataagtga-

>NC350\_AY107949

caaggtttcagataggatcaattgatctatatgggaaaaccatataactcccc-  
ggagctgtgtttcacttttcggctttctgaactgctcgggtctcacgagcctgtgtagtatcataaattcataatattgta  
atgcgagcatttactgtggacgcaacgc-----tctcttcagatgaatagataactgaataattaaga-----

gcatgatatatattgtttgcgcgcgcgattgagttctgaaatataagtga-  
>Ki3\_AY107949  
caaggtttcagataggatcaattgatctatatgggaaaaccatatgaactcccc-  
ggagctgtgtttcacttttcggctttctgaactgctcgggtctcacgagcctgtgtagtatcataaattcataatattgta  
atgcgagcatttactgtggacgcaacgc-----tctcttcagtatgaatagataactgaataattaaga-----  
gcatgatatatattgtttgcgcgcgcgattgagttctgaaatataagtgaa  
>Kill\_AY107949  
caaggtttcagataggatcaattgatctatatgggaaaaccatatgaactcccc-  
ggagctgtgtttcacttttcggctttctgaactgctcgggtctcacgagcctgtgtagtatcataaattcataatattgta  
atgcgagcatttactgtggacgcaacgc-----tctcttcagtatgaatagataactgaataattaaga-----  
gcatgatatatattgtttgcgcgcgcgattgag-----  
>CML333\_AY107949  
caaggtttcagataggatcaattgatctatatgggaaaaccatatgaactcccc-  
ggagctgtgtttcacttttcggctttctgaactgctcgggtctcacgagcctgtgtagtatcataaattcataatattgta  
atgcgagcatttactgtggacgcaacgc-----tctcttcagtatgaatagataactgaataattaaga-----  
gcatgatatatattgtttgcgcgcgcgattgagttctgaaatataagtgaa  
>CML69\_AY107949  
-aaggtttcagataggatcaattgatctatatgggaaaaccatatgaactcccc-  
ggagctgtgtttcacttttcggctttctgaactgctcgggtctcacgagcctgtgtagtatcataaattcataatattgta  
atgcgagcatttactgtggacgcaacgc-----tctcttcagtatgaatagataactgaataattaaga-----  
gcatgatatatattgtttgcgcgcgcgattgagttctgaaatataag----  
>Assinboine\_PI213793\_AY107949  
caaggtttcagataggatcaattgatctatatgggaaaaccatatgaactcccc-  
ggagctgtgtttcacttttcggctttctgaactgctcgggtctcacgagcctgtgtagtatcataaattcataatattgta  
atgcgagcatttactgtggacgcaacgc-----tctcttcagtatgaatagataactgaataattaaga-----  
gcatgatatatattgtttgcgcgcgcgattgagttctgaaatataagtgaa  
>Gordo\_CHH 160\_AY107949  
caaggtttcagataggatcaattgatctatatgggaaaaccatatgaactcccc-  
ggagctgtgtttcacttttcggctttctgaactgctcgggtctcacgagcctgtgtagtatcataaattcataatattgta  
atgcgagcatttactgtggacgcaacgc-----tctcttcagtatgaatagataactgaataattaaga-----  
gcatgatatatattgtttgcgcgcgcgattgagttctgaaatataagtgaa  
>Guirua\_MAG 450\_AY107949  
caaggtttcagataggatcaattgatctatatgggaaaaccatatgaactcccc-  
ggagctgtgtttcacttttcggctttctgaactgctcgggtctcacgagcctgtgtagtatcataaattcataatattgta  
atgcgagcatttactgtggacgcaacgc-----tctcttcagtatgaatagataactgaataattaaga-----  
gcatgatatatattgtttgcgcgcgcgattgagttctgaaatataagtgaa  
>Nal-tel\_YUC 7\_AY107949  
caaggtttcagataggatcaattgatctatatgggaaaaccatatgaactcccc-  
ggagctgtgtttcacttttcggctttctgaactgctcgggtctcacgagcctgtgtagtatcataaattcataatattgta  
atgcgagcatttactgtggacgcaacgc-----tctcttcagtatgaatagataactgaataattaaga-----  
gcatgatatatattgtttgcgcgcgcgattgagttctgaaatataagtgaa  
>Pisscotunto\_APC 13\_AY107949  
caaggtttcagataggatcaattgatctatatgggaaaaccatatgaactcccc-  
ggagctgtgtttcacttttcggctttctgaactgctcgggtctcacgagcctgtgtagtatcataaattcataatattgta  
atgcgagcatttactgtggacgcaacgc-----tctcttcagtatgaatagataactgaataattaaga-----  
gcatgatatatattgtttgcgcgcgcgattgagttctgaaatataagtgaa  
>Sabanero\_SAN 329\_AY107949  
-----tatatgggaaaaccatatgaactcccc-  
ggagctgtgtttcacttttcggctttctgaactgctcgggtctcacgagcctgtgtagtatcataaattcataatattgta  
atgcgagcatttactgtggacgcaacgc-----tctcttcagtatgaatagataactgaataattaaga-----  
gcatgatatatattgtttgcgcgcgcgattgagttctgaaatataagtgaa  
>Serrano\_GUA 14\_AY107949  
caaggtttcagataggatcaattgatctatatgggaaaaccatatgaactcccc-  
ggagctgtgtttcacttttcggctttctgaactgctcgggtctcacgagcctgtgtagtatcataaattcataatattgta  
atgcgagcatttactgtggacgcaacgc-----tctcttcagtatgaatagataactgaataattaaga-----  
gcatgatatatattgtttgcgcgcgcgattgagttctgaaatataagtgaa  
>Zapalote Chico\_OAX 70\_AY107949



caagggtttcagataggatcaattgatctatatgggaaaaccatataactcccc-  
ggagctgtgtttcacttttcggctttctgaactgctcgggtctcacgagcctgtgtagtatcataaattcataatattgta  
atgcgagcatttactgtggacgcaacgc-----tctcttcagtatgaatagataactgaataattaaga-----  
gcatgatataatattgtttgcgcgcgcgattgagttctgaaatataaagttaa  
>Bolita\_OAX 68\_AY107949  
caagggtttcagataggatcaattgatctatatgggaaaaccatataactcccc-  
ggagctgtgtttcacttttcggctttctgaactgctcgggtctcacgagcctgtgtagtatcataaattcataatattgta  
atgcgagcatttactgtggacgcaacgc-----tctcttcagtatgaatagataactgaataattaaga-----  
gcatgatataatattgtttgcgcgcgcgattgagttctgaaatataaagttaa  
>Cateto Sulino\_URG 11\_AY107949  
caagggtttcagataggatcaattgatctatatgggaaaaccatataactcccc-  
ggagctgtgtttcacttttcggctttctgaactgctcgggtctcacgagcctgtgtagtatcataaattcataatattgta  
atgcgagcatttactgtggacgcaacgc-----tctcttcagtatgaatagataactgaataattaaga-----  
gcatgatataatattgtttgcgcgcgcgattgagttctgaaatataaagttaa  
>Chalqueno\_MEX 48\_AY107949  
caagggtttcagataggatcaattgatctatatgggaaaaccatataactcccc-  
ggagctgtgtttcacttttcggctttctgaactgctcgggtctcacgagcctgtgtagtatcataaattcataatattgta  
atgcgagcatttactgtggacgcaacgc-----tctcttcagtatgaatagataactgaataattaaga-----  
gcatgatataatattgtttgcgcgcgcgattgagttctgaaatataaagttaa  
>Chapalote\_SIN 2\_AY107949  
caagggtttcagataggatcaattgatctatatgggaaaaccatataactcccc-  
ggagctgtgtttcacttttcggctttctgaactgctcgggtctcacgagcctgtgtagtatcataaattcataatattgta  
atgcgagcatttactgtggacgcaacgc-----tctcttcagtatgaatagataactgaataattaaga-----  
gcatgatataatattgtttgcgcgcgcgattgagttctgaaatataaagttaa  
>Conico\_PUE 32\_AY107949  
caagggtttcagataggatcaattgatctatatgggaaaaccatataactcccc-  
ggagctgtgtttcacttttcggctttctgaactgctcgggtctcacgagcctgtgtagtatcataaattcataatattgta  
atgcgagcatttactgtggacgcaacgc-----tctcttcagtatgaatagataactgaataattaaga-----  
gcatgatataatattgtttgcgcgcgcgattgagttctgaaatataaagttaa  
>Costeno\_VEN 453\_AY107949  
caagggtttcagataggatcaattgatctatatgggaaaaccatataactcccc-  
ggagctgtgtttcacttttcggctttctgaactgctcgggtctcacgagcctgtgtagtatcataaattcataatattgta  
atgcgagcatttactgtggacgcaacgc-----tctcttcagtatgaatagataactgaataattaaga-----  
gcatgatataatattgtttgcgcgcgcgattgagttctgaaatataaagttaa  
>Cristalino Norteno\_CHI 349\_AY107949  
caagggtttcagataggatcaattgatctatatgggaaaaccatataactcccc-  
ggagctgtgtttcacttttcggctttctgaactgctcgggtctcacgagcctgtgtagtatcataaattcataatattgta  
atgcgagcatttactgtggacgcaacgc-----tctcttcagtatgaatagataactgaataattaaga-----  
gcatgatataatattgtttgcgcgcgcgattgagttctgaaatataaagttaa  
>Dzit Bacal\_GUA 131\_AY107949  
caagggtttcagataggatcaattgatctatatgggaaaaccatataactcccc-  
ggagctgtgtttcacttttcggctttctgaactgctcgggtctcacgagcctgtgtagtatcataaattcataatattgta  
atgcgagcatttactgtggacgcaacgc-----tctcttcagtatgaatagataactgaataattaaga-----  
gcatgatataatattgtttgcgcgcgcgattgagttctgaaatataaagttaa  
>Jalisco\_Benz 967\_AY107949  
caagggtttcagataggatcaattgatctatatgggaaaaccatataactcccc-  
ggagctgtgtttcacttttcggctttctgaactgctcgggtctcacgagcctgtgtagtatcataaattcataatattgta  
atgcgagcatttactgtggacgcaacgc-----tctcttcagtatgaatagataactgaataattaaga-----  
gcatgatataatattgtttgcgcgcgcgattgagttctgaaatataaagttaa  
>Balsas\_Beadle & Kato Site 4\_AY107949  
caagggtttcagataggatcaattgatctatatgggaaaaccatataactcccccgagctgtgtttcacttttcggc  
tttctgaactgctcgggtctcacgagcctgtgtagtatcataaattcataatattgtaatgagcagcatttactgtggacgc  
aacgc-----tctcttcagtatgaatggataactgaataattaaga-----  
gcatgatataatattgtttgcgcgcgcgattgagttctgaaatataaagttaa  
>Balsas\_Kato Site 4\_AY107949  
caagggtttcagataggatcaattgatctatatgggaaaaccatataactcccc-  
ggagctgtgtttcacttttcggctttctgaactgctcgggtctcacgagcctgtgtagtatcataaattcataatattgta

atgCGagcatttactgtggacgcaacgc-----tctcttcagatgaatagatactgaataattaaga-----  
gcatgatataatattgtttgcgcgcgcgattga-----  
>Balsas\_Wilkes Site 6\_AY107949  
caaggtttcagataggatcaattgatctatatgggaaaaccatataactcccc-  
ggagctgtgtttcacttttcggctttctgaactgctcgggtctcacgagcctgtgtagtatcataaattcataatattgta  
atgCGagcatttactgtggacgcaacgc-----tctcttcagatgaatagatactgaataattaaga-----  
gcatgatataatattgtttgcgcgcgcgattgagttctgaaatataagtgaa  
>Balsas\_INIFAP JSP y Lo5130\_AY107949  
caaggtttcagataggatcaattgatctatatgggaaaaccatataactcccc-  
ggagctgtgtttcacttttcggctttctgaactgctcgggtctcacgagcctgtgtagtatcataaattcataatattgta  
atgCGagcatttactgtggacgcaacgc-----tctcttcagatgaatagatactgaataattaaga-----  
gcatgatataatattgtttgcgcgcgcgattgagttctgaaatataagtgaa  
>Balsas\_INIFAP JSG y LOS 119\_AY107949  
caaggtttcagataggatcaattgatctatatgggaaaaccatataactcccc-  
ggagctgtgtttcacttttcggctttctgaactgctcgggtctcacgagcctgtgtagtatcataaattcataatattgta  
atgCGagcatttactgtggacgcaacgc-----tctcttcagatgaatagatactgaataattaaga-----  
gcatgatataatattgtttgcgcgcgcgattgagttctgaaatataagtgaa  
>Jalisco\_INIFAP JSG y MAS 401\_AY107949  
caaggtttcagataggatcaattgatctatatgggaaaaccatataactcccc-  
ggagctgtgtttcacttttcggctttctgaactgctcgggtctcacgagcctgtgtagtatcataaattcataatattgta  
atgCGagcatttactgtggacgcaacgc-----tctcttcagatgaatagatactgaataattaaga-----  
gcatgatataatattgtttgcgcgcgcgattgagttctgaaatataagtgaa  
>Balsas\_CIMMYT 8783\_AY107949  
caaggtttcagataggatcaattgatctatatgggaaaaccatataactcccc-  
ggagctgtgtttcacttttcggctttctgaactgctcgggtctcacgagcctgtgtagtatcataaattcataatattgta  
atgCGagcatttactgtggacgcaacgc-----tctcttcagatgaatagatactgaataattaaga-----  
gcatgatataatattgtttgcgcgcgcgattgagttctgaaatataagtgaa  
>Oaxaca\_INIFAP JSG 197\_AY107949  
caaggtttcagataggatcaattgatctatatgggaaaaccatataactcccc-  
ggagctgtgtttcacttttcggctttctgaactgctcgggtctcacgagcctgtgtagtatcataaattcataatattgta  
atgCGagcatttactgtggacgcaacgc-----tctcttcagatgaatagatactgaataattaaga-----  
gcatgatataatattgtttgcgcgcgcgattgagttctgaaatataagtgaa  
>Balsas\_INIFAP JSG y LOS 109\_AY107949  
caaggtttcagataggatcaattgatctatatgggaaaaccatataactcccc-  
ggagctgtgtttcacttttcggctttctgaactgctcgggtctcacgagcctgtgtagtatcataaattcataatattgta  
atgCGagcatttactgtggacgcaacgc-----tctcttcagatgaatagatactgaataattaaga-----  
gcatgatataatattgtttgcgcgcgcgattgagttctgaaatataagtgaa  
>Balsas\_INIFAP JSG 378\_AY107949  
caaggtttcagataggatcaattgatctatatgggaaaaccatataactcccc-  
ggagctgtgtttcacttttcggctttctgaactgctcgggtctcacgagcctgtgtagtatcataaattcataatattgta  
atgCGagcatttactgtggacgcaacgc-----tctcttcagatgaatagatactgaataattaaga-----  
gcatgatataatattgtttgcgcgcgcgattgagttctgaaatataagtgaa  
>Balsas\_INIFAP JSG 374\_AY107949  
caaggtttcagataggatcaattgatctatatgggaaaaccatataactcccc-  
ggagctgtgtttcacttttcggctttctgaactgctcgggtctcacgagcctgtgtagtatcataaattcataatattgta  
atgCGagcatttactgtggacgcaacgc-----tctcttcagatgaatagatactgaataattaaga-----  
gcatgatataatattgtttgcgcgcgcgattgagttctgaaatataagtgaa  
>Balsas\_INIFAP JSG y LOS 161\_AY107949  
caaggtttcagataggatcaattgatctatatgggaaaaccatataactcccc-  
ggagctgtgtttcacttttcggctttctgaactgctcgggtctcacgagcctgtgtagtatcataaattcataatattgta  
atgCGagcatttactgtggacgcaacgc-----tctcttcagatgaatggatactgaataattaaga-----  
gcatgatataatattgtttgcgcgcgcgattgagttctgaaatataagtgaa  
>Balsas\_CIMMYT 11355\_AY107949  
caaggtttcagataggatcaattgatctatatgggaaaaccatataactcccc-  
ggagctgtgtttcacttttcggctttctgaactgctcgggtctcacgagcctgtgtagtatcataaattcataatattgta  
atgCGagcatttactgtggacgcaacgc-----tctcttcagatgaatagatactgaataattaaga-----  
gcatgatataatattgtttgcgcgcgcgattgagttctgaaatataagtgaa

>Balsas\_USDA PI566686\_AY107949

caaggtttcagataggatcaattgatctatatgggaaaacccatgaactcccc-  
ggagctgtgtttcacttttcggctttctgaactgctcggctcacgagcctgtgtagtatcataaattcataatattgta  
atgcgagcatttactgtggacgcaacgc-----tctcttcagatgaatagatactgaataattaaga-----  
gcatgatataatattgtttgcgcgcgcgattgagttctgaaatataagtgaa

>Jalisco\_INIFAP JSG y MAS 264\_AY107949

caaggtttcagataggatcaattgatctatatgggaaaacccatgaactcccc-  
ggagctgtgtttcacttttcggctttctgaactgctcggctcacgagcctgtgtagtatcataaattcataatattgta  
atgcgagcatttactgtggacgcaacgc-----tctcttcagatgaatagatactgaataattaaga-----  
gcatgatataatattgtttgcgcgcgcgattgagttctgaaatataagtgaa

>Tripsacum\_WW-2120\_AY107949

caaggtttcagataggatcaattgatctatatgggaaaacccatgaactcccc--  
ggagctgtgtttcacttttcggctttctgaactgctcggctcacgagcctgtgtagtagcataatcacaatattgta  
atgtgagcatttactgtggaagcaacgcaacgctctcttcagatgaatgaagattgaataattaagatttaagaacat  
gatataatattgtgtgcgcgcgcgattgagttctgaaatataagtgaa

>B73\_AY106125

-----

gccctaaataagaggatatcagcactggaaagcagaagagaaccaggaactatcaaagaggcatcagattaattctgagt  
tgggcttatgtcatggttacatctgcccatgtgtttttgattgctgcaggc-  
ggataaaactgcagcattttaagctgtactattgtgttggtaattctatgaactctgaatttgaattgtgttacactt  
ct---tgtctatgtcgtctttatgagatg

>Oh43\_AY106125

-----

gccctaaataagaggatatcagcactggaaagcagaagagaaccaggaactatcaaagaggcatcagattaattctgagt  
tgggcttatgtcatggttacatctgcccatgtgtttttgattgctgcaggc-  
ggataaaactgcagcattttaagctgtactattgtgttggtaattctatgaactctgaatttgaattgtgttacactt  
ct---tgtctatgtcgtctttatgagatg

>IL14H\_AY106125

----

ttatgcagccctaaataagaggatatcagcactggaaagcagaagagaaccaggaactatcaaagaggcatcagattaat  
tctgagttgggcttatgtcatggttacatctgcccatgtgtttttgattgctgcaggc-  
ggataaaactgcagcattttaagctgtactattgtgttggtaattctatgaactctgaatttgaattgtgttacactt  
ct---tgtctatgtcgtctttatgagatg

>Mo17\_AY106125

---

attatgcagccctaaataagaggatatcagcactggaaagcagaagagaaccaggaactatcaaagaggcatcagattaa  
ttctgagttgggcttatgtcatggttacatctgcccatgtgtttttgattgctgcaggc-  
ggataaaactgcagcattttaagctgtactattgtgttggtaattctatgaactctgaatttgaattgtgttacactt  
ct---tgtctatgtcgtctttat-----

>Ky21\_AY106125

---

attatgcagccctaaataagaggatatcagcactggaaagcagaagagaaccaggaactatcaaagaggcatcagattaa  
ttctgagttgggcttatgtcatggttacatctgcccatgtgtttttgattgctgcaggc-  
ggataaaactgcagcattttaagctgtactattgtgttggtaattctatgaactctgaatttgaattgtgttacactt  
ct---tgctc-----

>M37W\_AY106125

agcattatgcagccctaaataagaggatatcagcactggaaagcagaagagaaccaggaactatcaaagaggcatcagat  
taattctgagttgggcttatgtcatggttacatctgcccatgtgtttttgattgctgcaggc-  
ggataaaactgcagcattttaagctgtactattgtgttggtaattctatgaactctgaatttgaattgtgttacactt  
ct---tgtctat-----

>HP301\_AY106125

---

attatgcagccctaaataagaggatatcagcactggaaagcagaagagaaccaggaactatcaaagaggcatcagattaa  
ttctgagttgggcttatgtcatggttacatctgcccatgtgtttttgattgctgcaggc-

ggatataaactgcagcattttaagctgtactattgtgttgttgaaattctatgaactctgaatttgaattgtgttacactt  
ct---tgtc-----  
>CML247\_AY106125  
---  
attatgcagccctaaataagaggatatacagcactggaaagcagaagagaaccaggaactatcaaagaggcatcagattaa  
ttctgagttgggcttatgtcatggttacatctgcccatgtgtttttgattgctgcagggc-  
ggatataaactgcagcattttaagctgtactattgtgttgttgaaattctatgaactctgaatttgaattgtgttacactt  
ct---tgtctat-----  
>NC350\_AY106125  
agcattatgcagccctaaataagaggatatacagcactggaaagcagaagagaaccaggaactatcaaagaggcatcagat  
taattctgagttgggcttatgtcatggttacatctgcccatgtgtttttgattgctgcagggc-  
ggatataaactgcagcattttaagctgtactattgtgttgttgaaattctatgaactctgaatttgaattgtgttacactt  
ct---tgtctatg-----  
>Ki3\_AY106125  
agcattatgcagccctaaataagaggatatacagcactggaaagcagaagagaaccaggaactatcaaagaggcatcagat  
taattctgagttgggcttatgtcatggttacatctgcccatgtgtttttgattgctgcagggc-  
ggatataaactgcagcattttaagctgtactattgtgttgttgaaattctatgaactctgaatttgaattgtgttacactt  
ct---tgtcta-----  
>Kill\_AY106125  
agcattatgcagccctaaataagaggatatacagcactggaaagcagaagagaaccaggaactatcaaagaggcatcagat  
taattctgagttgggcttatgtcatggttacatctgcccatgtgtttttgattgctgcagggc-  
ggatataaactgcagcattttaagctgtactattgtgttgttgaaattctatgaactctgaatttgaattgtgttacactt  
ct---tgtctatgtcgtctttat-----  
>CML333\_AY106125  
agcattatgcagccctaaataagaggatatacagcactggaaagcagaagagaaccaggaactatcaaagaggcatcagat  
taattctgagttgggcttatgtcatggttacatctgcccatgtgtttttgattgctgcagggc-  
ggatataaactgcagcattttaagctgtactattgtgttgttgaaattctatgaactctgaatttgaattgtgttacactt  
ct---tgtctatgtcgtctttat-----  
>CML322\_AY106125  
---  
attatgcagccctaaataagaggatatacagcactggaaagcagaagagaaccaggaactatcaaagaggcatcagattaa  
ttctgagttgggcttatgtcatggttacatctgcccatgtgtttttgattgctgcagggc-  
ggatataaactgcagcattttaagctgtactattgtgttgttgaaattctatgaactctgaatttgaattgtgttacactt  
ct---tgtctatgtcgtctttat-----  
>CML69\_AY106125  
agcattatgcagccctaaataagaggatatacagcactggaaagcagaagagaaccaggaactatcaaagaggcatcagat  
taattctgagttgggcttatgtcatggttacatctgcccatgtgtttttgattgctgcagggc-  
ggatataaactgcagcattttaagctgtactattgtgttgttgaaattctatgaactctgaatttgaattgtgttacactt  
ct---tgtctatgtcgtctttat-----  
>Assinboine\_PI213793\_AY106125  
agcattatgcagccctaaataagaggatatacagcactggaaagcagaagagaaccaggaactatcaaagaggcatcagat  
taattctgagttgggcttatgtcatggttacatctgcccatgtgtttttgattgctgcagggc-  
ggatataaactgcagcattttaagctgtactattgtgttgttgaaattctatgaactctgaatttgaattgtgttacactt  
ct---tgtctatgtcgtctttatgagatg  
>Gordo\_CHH 160\_AY106125  
agcattatgcagccctaaataagaggatatacagcactggaaagcagaagagaaccaggaactatcaaagaggcatcagat  
taattctgagttgggcttatgtcatggttacatctgcccatgtgtttttgattgctgcagggc-  
ggatataaactgcagcattttaagctgtactattgtgttgttgaaattctatgaactctgaatttgaattgtgttacactt  
ct---tgtctatgtcgtctttatgagatg  
>Guirua\_MAG 450\_AY106125  
agcattatgcagccctaaataagaggatatacagcactggaaagcagaagagaaccaggaactatcaaagaggcatcagat  
taattctgagttgggcttatgtcatggttacatctgcccatgtgtttttgattgctgcagggc-  
ggatataaactgcagcattttaagctgtactattgtgttgttgaaattctatgaactctgaatttgaattgtgttacactt  
ct---tgtctatgtcgtctttatgagatg  
>Nal-tel\_YUC 7\_AY106125  
agcattatgcagccctaaataagaggatatacagcactggaaagcagaagagaaccaggaactatcaaagaggcatcagat  
taattctgagttgggcttatgtcatggttacatctgcccatgtgtttttgattgctgcagggc-

ggatataaactgcagcattttaagctgtactattgtgttggttgaaattctatgaactctgaatttgaattgtgttacactt  
ct---tgtctatgtcgtcctttatgagatg  
>Pisscotunto\_APC 13\_AY106125  
agcattatgcagccctaaataagaggatatcagcactggaaagcagaagagaaccaggaactatcaaagagggcatcagat  
taattctgagttgggcttatgtcatggttacatctgccatgtgttttgattgctgcagggc-  
ggatataaactgcagcattttaagctgtactattgtgttggttgaaattctatgaactctgaatttgaattgtgttacactt  
ct---tgtctatgtcgtcctttatgagatg  
>Sabanero\_SAN 329\_AY106125  
agcattatgcagccctaaataagaggatatcagcactggaaagcagaagagaaccaggaactatcaaagagggcatcagat  
taattctgagttgggcttatgtcatggttacatctgccatgtgttttgattgctgcagggc-  
ggatataaactgcagcattttaagctgtactattgtgttggttgaaattctatgaactctgaatttgaattgtgttacactt  
ct---tgtctatgtcgtcctttatgagatg  
>Serrano\_GUA 14\_AY106125  
agcattatgcagccctaaataagaggatatcagcactggaaagcagaagagaaccaggaactatcaaagagggcatcagat  
taattctgagttgggcttatgtcatggttacatctgccatgtgttttgattgctgcagggc-  
ggatataaactgcagcattttaagctgtactattgtgttggttgaaattctatgaactctgaatttgaattgtgttacactt  
ct---tgtctatgtcgtcctttatgagatg  
>Zapalote Chico\_OAX 70\_AY106125  
agcattatgcagccctaaataagaggatatcagcactggaaagcagaagagaaccaggaactatcaaagagggcatcagat  
taattctgagttgggcttatgtcatggttacatctgccatgtgttttgattgctgcagggc-  
ggatataaactgcagcattttaagctgtactattgtgttggttgaaattctatgaactctgaatttgaattgtgttacactt  
ct---tgtctatgtcgtcctttatgagatg  
>Cateto Sulino\_URG 11\_AY106125  
agcattatgcagccctaaataagaggatatcagcactggaaagcagaagagaaccaggaactatcaaagagggcatcagat  
taattctgagttgggcttatgtcatggttacatctgccatgtgttttgattgctgcagggc-  
ggatataaactgcagcattttaagctgtactattgtgttggttgaaattctatgaactctgaatttgaattgtgttacactt  
ct---tgtctatgtcgtcctttatgagatg  
>Chalqueno\_MEX 48\_AY106125  
agcattatgcagccctaaataagaggatatcagcactggaaagcagaagagaaccaggaactatcaaagagggcatcagat  
taattctgagttgggcttatgtcatggttacatctgccatgtgttttgattgctgcagggc-  
ggatataaactgcagcattttaagctgtactattgtgttggttgaaattctatgaactctgaatttgaattgtgttacactt  
ct---tgtctatgtcgtcctttatgagatg  
>Chapalote\_SIN 2\_AY106125  
agcattatgcagccctaaataagaggatatcagcactggaaagcagaagagaaccaggaactatcaaagagggcatcagat  
taattctgagttgggcttatgtcatggttacatctgccatgtgttttgattgctgcagggc-  
ggatataaactgcagcattttaagctgtactattgtgttggttgaaattctatgaactctgaatttgaattgtgttacactt  
ct---tgtctatgtcgtcctttatgagatg  
>Conico\_PUE 32\_AY106125  
agcattatgcagccctaaataagaggatatcagcactggaaagcagaagagaaccaggaactatcaaagagggcatcagat  
taattctgagttgggcttatgtcatggttacatctgccatgtgttttgattgctgcagggc-  
ggatataaactgcagcattttaagctgtactattgtgttggttgaaattctatgaactctgaatttgaattgtgttacactt  
ct---tgtctatgtcgtcctttatgagatg  
>Costeno\_VEN 453\_AY106125  
agcattatgcagccctaaataagaggatatcagcactggaaagcagaagagaaccaggaactatcaaagagggcatcagat  
taattctgagttgggcttatgtcatggttacatctgccatgtgttttgattgctgcagggc-  
ggatataaactgcagcattttaagctgtactattgtgttggttgaaattctatgaactctgaatttgaattgtgttacactt  
ct---tgtctatgtcgtcctttatgagatg  
>Cristalino Norteno\_CHI 349\_AY106125  
agcattatgcagccctaaataagaggatatcagcactggaaagcagaagagaaccaggaactatcaaagagggcatcagat  
taattctgagttgggcttatgtcatggttacatctgccatgtgttttgattgctgcagggc-  
ggatataaactgcagcattttaagctgtactattgtgttggttgaaattctatgaactctgaatttgaattgtgttacactt  
ct---tgtctatgtcgtcctttatgagatg  
>Balsas\_Beadle & Kato Site 4\_AY106125  
agcattatgcagccctaaataagaggatatcagcactggaaagcagaagagaaccaggaactatcaaagagggcatcagat  
taattctgagttgggcttatgtcatggttacatctgccatgtgttttgattgctgcagggcggatataaactgcagcat  
tttaagctgtactattgtgttggttgaaattctatgaactctgaatttgaattgtgttacacttct---  
tgtctatgtcgtcctttatgagatg

>Balsas\_Kato Site 4\_AY106125

agcattatgcagccctaaataagaggatatcagcactggaaagcagaagagaaccaggaactatcaaagaggcatcagat  
taattctgagttgggcttatgtcatggttacatctgccatgtgtttttgattgctgcagggc-  
ggatataaactgcagcattttaagctgtactattgtgtgtgtgaaattctatgaactctgaatttgaattgtgttacactt  
-----gtctatgtcgtctttatgagatg

>Balsas\_Wilkes Site 6\_AY106125

agcattatgcagccctaaataagaggatatcagcactggaaagcagaagagaaccaggaactatcaaagaggcatcagat  
taattctgagttgggcttatgtcatggttacatctgccatgtgtttttgattgctgcagggc-  
ggatataaactgcagcattttaagctgtactattgtgtgtgtgaaattctatgaactctgaatttgaattgtgttacactt  
ct---tgtctatgtcgtctttatgagatg

>Balsas\_INIFAP JSP y Lo5130\_AY106125

agcattatgcagccctaaataagaggatatcagcactggaaagcagaagagaaccaggaactatcaaagaggcatcagat  
taattctgagttgggcttatgtcatggttacatctgccatgtgtttttgattgctgcagggc-  
ggatataaactgcagcattttaagctgtactattgtgtgtgtgaaattctatgaactctgaatttgaattgtgttacactt  
ct---tgtctatgtcgtctttatgagatg

>Balsas\_INIFAP JSG y LOS 119\_AY106125

agcattatgcagccctaaataagaggatatcagcactggaaagcagaagagaaccaggaactatcaaagatgcatcagat  
taattctgagttgggcttatgtcatggttacatctgccatgtgtttttgattgctgcagggc-  
ggatataaactgcagcattttaagctgtactattgtgtgtgtgaaattctatgaactctgaatttgaattgtgttacactt  
-----gtctatgtcgtctttatgagatg

>Jalisco\_INIFAP JSG y MAS 401\_AY106125

agcattatgcagccctaaataagaggatatcagcactggaaagcagaagagaaccaggaactatcaaagaggcatcagat  
taattctgagttgggcttatgtcatggttacatctgccatgtgtttttgattgctgcagggc-  
ggatataaactgcagcattttaagctgtactattgtgtgtgtgaaattctatgaactctgaatttgaattgtgttacactt  
-----gtctatgtcgtctttatgagatg

>Balsas\_CIMMYT 8783\_AY106125

agcattatgcagccctaaataagaggatatcagcactggaaagcagaagagaaccaggaactatcaaagaggcatcagat  
taattctgagttgggcttatgtcatggttacatctgccatgtgtttttgattgctgcagggc-  
ggatataaactgcagcattttaagctgtactattgtgtgtgtgaaattctatgaactctgaatttgaattgtgttacactt  
ct---tgtctatgtcgtctttatgagatg

>Oaxaca\_INIFAP JSG 197\_AY106125

agcattatgcagccctaaataagaggatatcagcactggaaagcagaagagaaccaggaactatcaaagaggcatcagat  
taattctgagttgggcttatgtcatggttacatctgccatgtgtttttgattgctgcagggc-  
ggatataaactgcagcattttaagctgtactattgtgtgtgtgaaattctatgaactctgaatttgaattgtgttacactt  
-----gtctatgtcgtctttatgacatg

>Balsas\_INIFAP JSG y LOS 109\_AY106125

agcattatgcagccctaaataagaggatatcagcactggaaagcagaagagaaccaggaactatcaaagaggcatcagat  
taattctgagttgggcttatgtcatggttacatctgccatgtgtttttgattgctgcagggc-  
ggatataaactgcagcattttaagctgtactattgtgtgtgtgaaattctatgaactctgaatttgaattgtgttacactt  
ct---tgtctatgtcgtctttatgagatg

>Balsas\_INIFAP JSG 378\_AY106125

agcattatgcagccctaaataagaggatatcagcactggaaagcagaagagaaccaggaactatcaaagaggcatcagat  
taattctgagttgggcttatgtcatggttacatctgccatgtgtttttgattgctgcagggc-  
ggatataaactgcagcattttaagctgtactattgtgtgtgtgaaattctatgaactctgaatttgaattgtgttacactt  
ct---tgtctatgtcgtctttatgagatg

>Balsas\_INIFAP JSG 374\_AY106125

agcattatgcagccctaaataagaggatatcagcactggaaagcagaagagaaccaggaactatcaaagaggcatcagat  
taatt--gagttgggcttatgtcatggttacatctgccatgtgtttttgattgctgcagggc-  
tgatataaactgcagcattttaagctgtactattgtgtgtgtgaaattctatgaactctgaatttgaattgtgttacactt  
tct---tgtctatgtcgtctttatgagatg

>Balsas\_INIFAP JSG y LOS 161\_AY106125

agcattatgcagccctaaataagaggatatcagcactggaaagcagaagagaaccaggaactatcaaagaggcatcagat  
taattctgagttgggcttatgtcatggttacatctgccatgtgttttttattgctgcagggc-  
ggatataaactgcagcattttaagctgtactattgtgtgtgtgaaattctatgaactctgaatttgaattgtgttacactt  
-----gtctatgtcgtctttatgagatg

>Balsas\_CIMMYT 11355\_AY106125

agcattatgcagccctaaataagaggatatcagcactggaaagcagaagagaaccaggaactatcaaagaggcatcagat

taattctgagttgggcttatgtcatggttacatctgcccattgtgtttttgattgctgcagggc-  
ggataaaactgcagcattttaagctgtactattgtgtgtgttgaaattctatgaactctgaatttgaattgtgttacactt  
ct---tgtctatgtcgtctttacgacatg  
>Balsas\_USDA PI566686\_AY106125  
agcattatgcagccctaaataagaggatatacagcactggaaagcagaagagaaccaggaactatcaaagaggcatcagat  
taattctgagttgggcttatgtcatggttacatctgcccattgtgtttttgattgctgcagggc-  
ggataaaactgcagcattttaagctgtactattgtgtgtgttgaaattctatgaactctgaatttgaattgtgttacactt  
ct---tgtctatgtcgtctttatgagatg  
>Jalisco\_INIFAP JSG y MAS 264\_AY106125  
agcattatgcagccctaaataagaggatatacagcactggaaagcagaagagaaccaggaactatcaaagaggcatcagat  
taattctgagttgggcttatgtcatggttacatctgcccattgtgtttttgattgctgcagggc-  
ggataaaactgcagcattttaagctgtactattgtgtgtgttgaaattctatgaactctgaatttgaattgtgttacactt  
ct---tgtctatgtcgtctttatgagatg  
>Tripsacum\_WW-2120\_AY106125  
agcattatgcagccctaaataagaggatatacagcactggaaagcagaagagaatcaggaactatcaaagaggcatcagat  
taactctgatttgggcttatgtcatggttacatctgcccagggtgtttttgattgctgcagtg-  
tggtataaaactgcagcattttaagctgtactattgtgtgtgttgaaattctatgaactctgaatttgaattgtgttacact  
tctgcgtgtctatgtcgtctttatgagatg

>B73\_AY107673  
gaaaaattcgggaatgcttcctcctttctcagagacaca--  
aactgctcagtttgaagaccacaagcacatctgcccccaacttccatgagatagag-cagg-  
agcagggcagttgagccagcctccgcacgggtctatggtgaatatgcagcagtcagccagcacaaaacagtttcagctat  
ccaactaacagcttt-  
acaacaagcagtgaaatgcccataccatgtcctatcaactaaacaaaagctgtgtctaaatcccctgacctaaaatttagc  
cgactcctttccgggtaatacaacaacaattcaacatc  
>Oh43\_AY107673

-----gaatgcttcctcctttctcagagacaca--  
aactgctcagtttgaagaccacaagcacatctgcccccaacttccatgagatagag-cagg-  
agcagggcagttgagccagcctccgcacgggtctatggtgaatatgcagcagtcagccagcacaaaacagtttcagctat  
ccaactaacagcttt-  
acaacaagcagtgaaatgcccataccatgtcctatcaactaaacaaaagctgtgtctaaatcccctgacctaaaatttagc  
cgactcctttcc-----

>Mo17\_AY107673  
gaaaaattcgggaatgcttcctcctttctcagagacaca--  
aactgctcagtttgaagaccacaagcacatctgcccccaacttccatgagatagag-cagg-  
agcagggcagttgagccagcctccgcacgggtctatggtgaatatgcagcagtcagccagcacaaaacagtttcagctat  
ccaactaacagcttt-  
acaacaagcagtgaaatgcccataccatgtcctatcaactaaacaaaagctgtgtctaaatcccctgacctaaaatttagc  
cgactcctttccgggtaatacaacaacaattcaacatc  
>Ky21\_AY107673

gaaaaattcgggaatgcttcctcctttctcagagacaca--  
aactgctcagtttgaagaccacaagcacatctgcccccaacttccatgagatagag-cagg-  
agcagggcagttgagccagcctccgcacgggtctatggtgaatatgcagcagtcagccagcacaaaacagtttcagctat  
ccaactaacagcttt-  
acaacaagcagtgaaatgcccataccatgtcctatcaactaaacaaaagctgtgtctaaatcccctgacctaaaatttagc  
cgactcctttccgggtaatacaacaacaattcaaca--  
>M37W\_AY107673

-aaaaattcgggaatgcttcctcctttctcagagacaca--  
aactgctcagtttgaagaccacaagcacatctgcccccaacttccatgagatagag-cagg-  
agcagggcagttgagccagcctccgcacgggtctatggtgaatatgcagcagtcagccagcacaaaacagtttcagctat  
ccaactaacagcttt-  
acaacaagcagtgaaatgcccataccatgtcctatcaactaaacaaaagctgtgtctaaatcccctgacctaaaatttagc  
cgactcctttccgggtaatacaaca-----  
>HP301\_AY107673

-----  
ttgaagaccacaagcacatctgcccccaacttccatgagatagag-cagg-  
agcagggcagttgagccagcctccgcacgggtctatggtgaatatgcagcagtcagccagcacaaaacagtttcagctat  
ccaactaacagcttt-  
acaacaagcagtgatgcccataccatgtcctatcaactaaacaaaagctgtgtctaaatcccctgacctaaaatt----  
-----

>CML247\_AY107673

gaaaaattcgggaatgcttcctcctttctcagagacaca--  
aactgctcagtttgaagaccacaagcacatctgcccccaacttccatgagatagag-cagg-  
agcagggcagttgagccagcctccgcacgggtctatggtgaatatgcagcagtcagccagcacaaaacagtttcagctat  
ccaactaacagcttt-  
acaacaagcagtgatgcccataccatgtcctatcaactaaacaaaagctgtgtctaaatcccctgacctaaaatttagc  
cgactcctttccgggtaatacaacaacaattcaacatc

>NC350\_AY107673

-aaaaattcgggaatgcttcctcctttctcagagacaca--  
aactgctcagtttgaagaccacaagcacatctgcccccaacttccatgagatagag-cagg-  
agcagggcagttgagccagcctccgcacgggtctatggtgaatatgcagcagtcagccagcacaaaacagtttcagctat  
ccaactaacagcttt-  
acaacaagcagtgatgcccataccatgtcctatcaactaaacaaaagctgtgtctaaatcccctgacctaaaatttagc  
cgactcctttccgggtaatacaacaacaattcaacatc

>Kill\_AY107673

gaaaaattcgggaatgcttcctcctttctcagagacaca--  
aactgctcagtttgaagaccacaagcacatctgcccccaacttccatgagatagag-cagg-  
agcagggcagttgagccagcctccgcacgggtctatggtgaatatgcagcagtcagccagcacaaaacagtttcagctat  
ccaactaacagcttt-  
acaacaagcagtgatgcccataccatgtcctatcaactaaacaaaagctgtgtctaaatcccctgacctaaaatttagc  
cgactcctttccgggtaatacaacaacaattcaacatc

>CML333\_AY107673

gaaaaattcgggaatgcttcctcctttctcagagacaca--  
aactgctcagtttgaagaccacaagcacatctgcccccaacttccatgagatagag-cagg-  
agcagggcagttgagccagcctccgcacgggtctatggtgaatatgcagcagtcagccagcacaaaacagtttcagctat  
ccaactaacagcttt-  
acaacaagcagtgatgcccataccatgtcctatcaactaaacaaaagctgtgtctaaatcccctgacctaaaatttagc  
cgactcctttccgggtaatacaacaac-----

>CML322\_AY107673

gaaaaattcgggaatgcttcctcctttctcagagacaca--  
aactgctcagtttgaagaccacaagcacatctgcccccaacttccatgagatagag-cagg-  
agcagggcagttgagccagcctccgcacgggtctatggtgaatatgcagcagtcagccagcacaaaacagtttcagctat  
ccaactaacagcttt-  
acaacaagcagtgatgcccataccatgtcctatcaactaaacaaaagctgtgtctaaatcccctgacctaaaatttagc  
cgactcctttccgggtaatacaacaaa-----

>CML69\_AY107673

-aaaaattcgggaatgcttcctcctttctcagagacaca--  
aactgctcagtttgaagaccacaagcacatctgcccccaacttccatgagatagag-cagg-  
agcagggcagttgagccagcctccgcacgggtctatggtgaatatgcagcagtcagccagcacaaaacagtttcagctat  
ccaactaacagcttt-  
acaacaagcagtgatgcccataccatgtcctatcaactaaacaaaagctgtgtctaaatcccctgacctaaaatttagc  
cgactcctttccgggtaatacaacaac-----

>Assinboine\_PI213793\_AY107673

gaaaaattcgggaatgcttcctcctttctcagagacaca--  
aactgctcagtttgaagaccacaagcacatctgcccccaacttccatgagatagag-cagg-  
agcagggcagttgagccagcctccgcacgggtctatggtgaatatgcagcagtcagccagcacaaaacagtttcagctat  
ccaactaacagcttt-  
acaacaagcagtgatgcccataccatgtcctatcaactaaacaaaagctgtgtctaaatcccctgacctaaaatttagc  
cgactcctttccgggtaatacaacaacaattcaacatc

>Pisscotunto\_APC\_13\_AY107673

gaaaaattcgggaatgcttcctcctttctcagagacaca--



aactgctcagtttgaagaccacaagcacatctgcccccaacttccatgagatagag-cagg-  
agcagggcagttgagccagcctccgcacgggtctatgttgaatatgcagcagtcagccagcacaaaacagtttcagctat  
ccaactaacagcttt-  
acaacaagcagtgatgcccataccatgtcctatcaactaaacaaaagctgtgtctaaatcccctgacctaaaatttagc  
cgactcctttccgggtaatacaacaacaattcaacatc  
>Sabanero\_SAN 329\_AY107673  
gaaaaattcgggaatgcttcctcctttctcagagacaca--  
aactgctcagtttgaagaccacaagcacatctgcccccaacttccatgagatagag-cagg-  
agcagggcagttgagccagcctccgcacgggtctatgttgaatatgcagcagtcagccagcacaaaacagtttcagctat  
ccaactaacagcttt-  
acaacaagcagtgatgcccataccatgtcctatcaactaaacaaaagctgtgtctaaatcccctgacctaaaatttagc  
cgactcctttccgggtaatacaacaacaattcaacatc  
>Cateto Sulino\_URG 11\_AY107673  
gaaaaattcgggaatgcttcctcctttctcagagacaca--  
aactgctcagtttgaagaccacaagcacatctgcccccaacttccatgagatagag-cagg-  
agcagggcagttgagccagcctccgcacgggtctatgttgaatatgcagcagtcagccagcacaaaacagtttcagctat  
ccaactaacagcttt-  
acaacaagcagtgatgcccataccatgtcctatcaactaaacaaaagctgtgtctaaatcccctgacctaaaatttagc  
cgactcctttccgggtaatacaacaacaattcaccatc  
>Chalqueno\_MEX 48\_AY107673  
gaaaaattcgggaatgcttcctcctttctcagagacaca--  
aactgctcagtttgaagaccacaagcacatctgcccccaacttccatgagatagag-cagg-  
agcagggcagttgagccagcctccgcacgggtctatgttgaatatgcagcagtcagccagcacaaaacagtttcagctat  
ccaactaacagcttt-  
acaacaagcagtgatgcccataccatgtcctatcaactaaacaaaagctgtgtctaaatcccctgacctaaaatttagc  
cgactcctttccgggtaatacaacaacaattcaccatc  
>Chapalote\_SIN 2\_AY107673  
gaaaaattcgggaatgcttcctcctttctcagacacacagaaactgctcagtttgaagaccacaagcacatctgccccca  
cttccatgagatagag-cagg-  
agcagggcagttgagccagcctccgcacgggtctatgttgaatatgcagcagtcagccagcacaaaacagtttcagctat  
ccaactaacagcttt-  
acaacaagcagtgatgcccataccatgtcctatcaactaaacaaaagctgtgtctaaatcccctgacctaaaatttagc  
cgactcctttccgggtaatacaacaacaattcaacatc  
>Costeno\_VEN 453\_AY107673  
gaaaaattcgggaatgcttcctcctttctcagagacaca--  
aactgctcagtttgaagaccacaagcacatctgcccccaacttccatgagatagag-cagg-  
agcagggcagttgagccagcctccgcacgggtctatgttgaatatgcagcagtcagccagcacaaaacagtttcagctat  
ccaactaacagcttt-  
acaacaagcagtgatgcccataccatgtcctatcaactaaacaaaagctgtgtctaaatcccctgacctaaaatttagc  
cgactcctttccgggtaatacaacaacaattcaacatc  
>Cristalino Norteno\_CHI 349\_AY107673  
gaaaaattcgggaatgcttcctcctttctcagagacaca--  
aactgctcagtttgaagaccacaagcacatctgcccccaacttccatgagatagag-cagg-  
agcagggcagttgagccagcctccgcacgggtctatgttgaatatgcagcagtcagccagcacaaaacagtttcagctat  
ccaactaacagcttt-  
acaacaagcagtgatgcccataccatgtcctatcaactaaacaaaagctgtgtctaaatcccctgacctaaaatttagc  
cgactcctttccgggtaatacaacaacaattcaacatc  
>Dzit Bacal\_GUA 131\_AY107673  
gaaaaattcgggaatgcttcctcctttctcagacacacagaaactgctcagtttgaagaccacaagcacatctgccccca  
cttccatgagatagag-cagg-  
agcagggcagttgagccagcctccgcacgggtctatgttgaatatgcagcagtcagccagcacaaaacagtttcagctat  
ccaactaacagcttt-  
acaacaagcagtgatgcccataccatgtcctatcaactaaacaaaagctgtgtctaaatcccctgacctaaaatttagc  
cgactcctttccgggtaatacaacaacaattcatc  
>Jalisco\_Benz 967\_AY107673  
gaaaaattcgggaatgcttcctcctttctcagagacaca--  
aactgctcagtttgaagaccacaagcacatctgcccccaacttccatgagatagag-cagg-

agcagggcagttgagccagcctccgcacgggtctatgttgaatatgcagcagtcagccagcacaaaacagtttcagctat  
ccaactaacagcttt-  
acaacaagcagtgaaatgcccataccatgtcctatcaactaaacaaaagctgtgtctaaatcccctgacctaaaatttagc  
cgactcctttccgggtaatacaacaacaattcatcatc  
>Balsas\_Kato Site 4\_AY107673  
gaaaaattcggaatgcttcctcctttctcagacacacagaaaactgctcagtttgaagaccacaagcacatctgccccca  
cttccatgagatagag-cagg-  
agcagggcagttgagccagcctccgcacgggtctatgttgaatatgcagcagtcagccagcacaaaacagtttcagctat  
ccaactaacagcttt-  
acaacaagcagtgaaatgcccataccatgtcctatcaactaaacaaaagctgtgtctaaatcccctgacctaaaatttagc  
cgactcctttccgggtaatacaacaacaattcatcatc  
>Balsas\_Wilkes Site 6\_AY107673  
gaaaaattcggaatgcttcctcctttctcagacacacagaaaactgctcagtttgaagaccacaagcacatctgccccca  
cttccatgagatagag-cagg-  
agcagggcagttgagccagcctccgcacgggtctatgttgaatatgcagcagtcagccagcacaaaacagtttcagctat  
ccaactaacagcttt-  
acaacaagcagtgaaatgcccataccatgtcctatcaactaaacaaaagctgtgtctaaatcccctgacctaaaatttagc  
cgactcctttccgggtaatacaacaacaattcatcatc  
>Balsas\_INIFAP JSP y Lo5130\_AY107673  
gaaaaattcggaatgcttcctcctttctcagagacaca--  
aactgctcagtttgaagaccacaagcacatctgcccccaacttccatgagatagag-cagg-  
agcagggcagttgagccagcctccgcacgggtctatgttgaatatgcagcagtcagccagcacaaaacagtttcagctat  
ccaactaacagcttt-  
acaacaagcagtgaaatgcccataccatgtcctatcaactaaacaaaagctgtgtctaaatcccctgacctaaaatttagc  
cgactcctttccgggtaatacaacaacaattcatcatc  
>Jalisco\_INIFAP JSG y MAS 401\_AY107673  
gaaaaattcggaatgcttcctcctttctcagagacaca--  
aactgctcagtttgaagaccacaagcacatctgcccccaacttccatgagatagag-cagg-  
agcagggcagttgagccagcctccgcacgggtctatgttgaatatgcagcagtcagccagcacaaaacagtttcagctat  
ccaactaacagcttt-  
acaacaagcagtgaaatgcccataccatgtcctatcaactaaacaaaagctgtgtctaaatcccctgacctaaaatttagc  
cgactcctttccgggtaatacaacaacaattcatcatc  
>Balsas\_CIMMYT 8783\_AY107673  
gaaaaattcggaatgcttcctcctttctcagacacacagaaaactgctcagtttgaagaccacaagcacatctgccccca  
cttccatgagatagag-cagg-  
agcagggcagttgagccagcctccgcacgggtctatgttgaatatgcagcagtcagccagcacaaaacagtttcagctat  
ccaactaacagcttt-  
acaacaagcagtgaaatgcccataccatgtcctatcaactaaacaaaagctgtgtctaaatcccctgacctaaaatttagc  
cgactcctttccgggtaatacaacaacaattcatcatc  
>Oaxaca\_INIFAP JSG 197\_AY107673  
gaaaaattcggaatgcttcctcctttctcagacacacagaaaactgctcagtttgaagaccacaagcacatctgccccca  
cttccatgagatagag-cagg-  
agcagggcagttgagccagcctccgcacgggtctatgttgaatatgcagcagtcagccagcacaaaacagtttcagctat  
ccaactaacagcttt-  
acaacaagcagtgaaatgcccataccatgtcctatcaactaaacaaaagctgtgtctaaatcccctgacctaaaatttagc  
cgactcctttccgggtaatacaacaacaattcatcatc  
>Balsas\_INIFAP JSG y LOS 109\_AY107673  
gaaaaattcggaatgcttcctcctttctcagacacacagaaaactgctcagtttgaagaccacaagcacatctgccccca  
cttccatgagatagag-cagg-  
agcagggcagttgagccagcctccgcacgggtctatgttgaatatgcagcagtcagccagcacaaaacagtttcagctat  
ccaactaacagcttt-  
acaacaagcagtgaaatgcccataccatgtcctatcaactaaacaaaagctgtgtctaaatcccctgacctaaaatttagc  
cgactcctttccgggtaatacaacaacaattcatcatc  
>Balsas\_INIFAP JSG 378\_AY107673  
gaaaaattcggaatgcttcctcctttctcagacacacagaaaactgctcagtttgaagaccacaagcacatctgccccca  
cttccatgagatagag-cagg-  
agcagggcagttgagccagcctccgcacgggtctatgttgaatatgcagcagtcagccagcacaaaacagtttcagctat

ccaactaacagcttt-  
acaacaagcagtgaaatgcccataccatgtcctatcaactaaacaaaagctgtgtctaaatcccctgacctaaaatttagc  
cgactcctttccgggtaatacaacaacaattcatcatc  
>Balsas\_INIFAP JSG 374\_AY107673  
gaaaaattcggaaatgcttctcctcctttctcagacacacagaaactgctcagtttgaagaccacaagcacatctgccccca  
cttccatgagatagag-cagg-  
agcagggcagttgagccagcctccgcacgggtctatggtgaatgagcagcagtcagccagcacaaaacagtttcagctat  
ccaactaacagcttt-  
acaacaagcagtgaaatgcccataccatgtcctatcaactaaacaaaagctgtgtctaaatcccctgacctaaaatttagc  
cgactcctttccgggtaatacaacaacaattcatcatc  
>Balsas\_INIFAP JSG y LOS 161\_AY107673  
-----  
ctcctttctcagacacacagaaactgctcagtttgaagaccacaagcacatctgcccccaacttccatgagatagag-  
cagg-  
agcagggcagttgagccagcctccgcacgggtctatggtgaatgagcagcagtcagccagcacaaaacagtttcagctat  
ccaactaacagcttt-  
acaacaagcagtgaaatgcccataccatgtcctatcaactaaacaaaagctgtgtctaaatcccctgacctaaaatttagc  
cgactcctttccgggtaatacaacaacaattcatcatc  
>Balsas\_CIMMYT 11355\_AY107673  
gaaaaattcggaaatgcttctcctcctttctcagacacacagaaactgctcagtttgaagaccacaagcacatctgccccca  
cttccatgagatagag-cagg-  
agcagggcagttgagccagcctccgcacgggtctatggtgaatgagcagcagtcagccagcacaaaacagtttcag-  
tatccaactaacagcttt-  
acaacaagcagtgaaatgcccataccatgtcctatcaactaaacaaaagctgtgtctaaatcccctgacctaaaatttagc  
cgactcctttccgggtaatacaacaacaattcatcatc  
>Tripsacum\_WW-2120\_haplotype1\_AY107673  
gaaaaattcagaatgcttctcctcctttagacacacagaaactgctccgtttgaaggcca--  
agcacatctgcccccaacttccatgagatacaggcatacagcagggcaggtgagttagccgcc-----  
-----tcagtcagcacaaaacagtttcagctatccaactaacagcttttacaaca-  
gcagtgatgcccatactatgtcctagcaactaaacaaaggctgtgtctaaatcccctgacctgaaattagccaactcc  
ttccaggttaatacaacaacaattcaacatc  
>Tripsacum\_WW-2120\_haplotype2\_AY107673  
gaaaaattcagaatgcttctcctcctttagacacacagaaactgctccgtttgaaggcca--  
agcacatctgcccccaacttccatgagatacaggcatacagcagggcagatgagttagccgcc-----  
-----tcagtcagcacaaaacagtttcagctatccaacaacagcttttacaaca-  
gcagtgatgcccatactatgtcctagcaactaaacaaaggctgtgtctaaatcccctgacctgaaattagccaactcc  
ttccaggttaatacaacaacaattcaacatc

>B73\_AY108759  
taaacaggcagctgaaatccatctacacagcaacagcaataccatcttctaccaggtcctagacacggcttaagccgctg  
ttgcatgggtcattagaaatactctttctaatactgtgttcctttattatcaactgagaatgttttataactccagggg  
gttctctgcaaacagtcaaataattcgaaaaactaagacaacattatTTTTTcaactcaaagtgttggt--  
tgtaggatagggcac  
>Oh43\_AY108759  
taaacaggcagctgaaatccatctacacagcaacagcaataccatcttctaccaggtcctagacacggcttaagccgctg  
ttgcatgggtcattagaaatactctttctaatactgtgttcctttattatcaactgagaatgttttataactccagggg  
gttctctgcaaacagtcaaataattcgaaaaactaagacaacattatTTTTTcaactcaaagtgttggt--tgtagg-----  
-----  
>IL14H\_AY108759  
-  
aaacaggcagctgaaatccatctacacagcaacagcaataccatcttctaccaggtcctagacacggcttaagccgctgt  
tgcatgggtcattagaaatactctttctaatactgtgttcctttattatcaactgagaatgttttataactccagggg  
ttctctgcaaacagtcaaataattcgaaaaactaagacaacattatTTTTTcaactcaaagtgttggt-----  
-----  
>Mo17\_AY108759

taaacaggcagctgaaatccatctacacagcaacagcaataccatcttctaccaggtcctagacacggcttaagccgctg  
ttgcatgggtcattagaaatactctttctaatacactgtgttcctttattatcaactgagaatgttttataactccagggg  
gttctctgcaaacagtcaaataattcgaaaaactaagacaacattatTTTTTcaactcaaagtgttgg--  
tgtaggataggcgc--

>Ky21\_AY108759

taaacaggcagctgaaatccatctacacagcaacagcaataccatcttctaccaggtcctagacacggcttaagccgctg  
ttgcatgggtcattagaaatactctttctaatacactgtgttcctttattatcaactgagaatgttttataactccagggg  
gttctctgcaaacagtcaaataattcgaaaaactaagacaacattatTTTTTcaactcaaagtgttgg--tgtagg-----  
-----

>M37W\_AY108759

taaacaggcagctgaaatccatctacacagcaacagcaataccatcttctaccaggtcctagacacggcttaagccgctg  
ttgcatgggtcattagaaatactctttctaatacactgtgttcctttattatcaactgagaatgttttataactccagggg  
gttctctgcaaacagtcaaataattcgaaaaactaagacaacattatTTTTTcaactcaaagtgttgg--  
tgtaggataggcgc---

>HP301\_AY108759

-

aaacaggcagctgaaatccatctacacagcaacagcaataccatcttctaccaggtcctagacacggcttaagccgctgt  
tgcatgggtcattagaaatactctttctaatacactgtgttcctttattatcaactgagaatgttttataactccaggggg  
ttctctgcaaacagtcaaataattcgaaaaactaagacaacattatTTTTTcaactcaaagtgttgg--  
tgtaggataggcgc--

>CML247\_AY108759

--

aacaggcagctgaaatccatctacacagcaacagcaataccatcttctaccaggtcctagacacggcttaagccgctgtt  
gcatgggtcattagaaatactctttctaatacactgtgttcctttattatcaactgagaatgttttataactccaggggg  
tctctgcaaacagtcaaataattcgaaaaactaagacaacattatTTTTTcaactcaaagtgttgg--  
tgtaggataggcgcac

>NC350\_AY108759

taaacaggcagctgaaatccatctacacagcaacagcaataccatcttctaccaggtcctagacacggcttaagccgctg  
ttgcatgggtcattagaaatactctttctaatacactgtgttcctttattatcaactgagaatgttttataactccagggg  
gttctctgcaaacagtcaaataattcgaaaaactaagacaacattatTTTTTcaactcaaagtgttgg--tgtagg-----  
-----

>Ki3\_AY108759

taaacaggcagctgaaatccatctacacagcaacagcaataccatcttctaccaggtcctagacacggcttaagccgctg  
ttgcatgggtcattagaaatactctttctaatacactgtgttcctttattatcaactgagaatgttttataactccagggg  
gttctctgcaaacagtcaaataattcgaaaaactaagacaacattatTTTTTcaactcaaagtgttgg--tgtagg-----  
-----

>Ki11\_AY108759

-

aaacaggcagctgaaatccatctacacagcaacagcaataccatcttctaccaggtcctagacacggcttaagccgctgt  
tgcatgggtcattagaaatactctttctaatacactgtgttcctttattatcaactgagaatgttttataactccaggggg  
ttctctgcaaacagtcaaataattcgaaaaactaagacaacattatTTTTTcaactcaaagtgttgg--  
tgtaggataggcgcac

>CML333\_AY108759

-

aaacaggcagctgaaatccatctacacagcaacagcaataccatcttctaccaggtcctagacacggcttaagccgctgt  
tgcatgggtcattagaaatactctttctaatacactgtgttcctttattatcaactgagaatgttttataactccaggggg  
ttctctgcaaacagtcaaataattcgaaaaactaagacaacattatTTTTTcaactcaaagtgttgg--tgtagg-----  
-----

>CML322\_AY108759

--

aacaggcagctgaaatccatctacacagcaacagcaataccatcttctaccaggtcctagacacggcttaagccgctgtt  
gcatgggtcattagaaatactctttctaatacactgtgttcctttattatcaactgagaatgttttataactccaggggg  
tctctgcaaacagtcaaataattcgaaaaactaagacaacattatTTTTTcaactcaaagtgttgg--tgtagg-----  
---

>CML69\_AY108759

-----

gaaatccatctacacagcaacagcaataccatcttctaccaggtcctagacacggcttaagccgctgttgcatgggtcat

tagaaataactcttttctaatactggtggttcctttattatcaactgagaatggtttataactccaggggggttcctgcaaaca  
gtcaaataattcgaaaaactaagacaacattatTTTTTcaactcaaagtgtggt--tgtaggataggcgac--  
>Assinboine\_PI213793\_AY108759  
taaacaggcagctgaaatccatctacacagcaacagcaataccatcttctaccaggtcctagacacggcttaagccgctg  
ttgcatgggtcattagaaatactcttttctaatactggtggttcctttattatcaactgagaatggtttataactccagggg  
gttctgcaaacagtcaaataattcgaaaaactaagacaacattatTTTTTcaactcaaagtgtggt--  
tgtaggataggcgac  
>Gordo\_CHH 160\_AY108759  
taaacaggcagctgaaatccatctacacagcaacagcaataccatcttctaccaggtcctagacacggcttaagccgctg  
ttgcatgggtcattagaaatactcttttctaatactggtggttcctttattatcaactgagaatggtttataactccagggg  
gttctgcaaacagtcaaataattcgaaaaactaagacaacattatTTTTTcaactcaaagtgtggt--  
tgtaggataggcgac  
>Guirua\_MAG 450\_AY108759  
taaacaggcagctgaaatccatctacacagcaacagcaataccatcttctaccaggtcctagacacggcttaagccgctg  
ttgcatgggtcattagaaatactcttttctaatactggtggttcctttattatcaactgagaatggtttataactccagggg  
gttctgcaaacagtcaaataattcgaaaaactaagacaacattatTTTTTcaactcaaagtgtggt--  
tgtaggataggcgac  
>Pisscotunto\_APC 13\_AY108759  
taaacaggcagctgaaatccatctacacagcaacagcaataccatcttctaccaggtcctagacacggcttaagccgctg  
ttgcatgggtcattagaaatactcttttctaatactggtggttcctttattatcaactgagaatggtttataactccagggg  
gttctgcaaacagtcaaataattcgaaaaactaagacaacattatTTTTTcaactcaaagtgtggt--  
tgtaggataggcgac  
>Sabanero\_SAN 329\_AY108759  
taaacaggcagctgaaatccatctacacagcaacagcaataccatcttctaccaggtcctagacacggcttaagccgctg  
ttgcatgggtcattagaaatactcttttctaatactggtggttcctttattatcaactgagaatggtttataactccagggg  
gttctgcaaacagtcaaataattcgaaaaactaagacaacattatTTTTTcaactcaaagtgtggt--  
tgtaggataggcgac  
>Serrano\_GUA 14\_AY108759  
taaacaggcagctgaaatccatctacacagcaacagcaataccatcttctaccaggtcctagacacggcttaagccgctg  
ttgcatgggtcattagaaatactcttttctaatactggtggttcctttattatcaactgagaatggtttataactccagggg  
gttctgcaaacagtcaaataattcgaaaaactaagacaacattatTTTTTcaactcaaagtgtggt--  
tgtaggataggcgac  
>Zapalote\_Chico\_OAX 70\_AY108759  
taaacaggcagctgaaatccatctacacagcaacagcaataccatcttctaccaggtcctagacacggcttaagccgctg  
ttgcatgggtcattagaaatactcttttctaatactggtggttcctttattatcaactgagaatggtttataactccagggg  
gttctgcaaacagtcaaataattcgaaaaactaagacaacattatTTTTTcaactcaaagtgtggt--  
tgtaggataggcgac  
>Bolita\_OAX 68\_AY108759  
taaacaggcagctgaaatccatctacacagcaacagcaataccatcttctaccaggtcctagacacggcttaagccgctg  
ttgcatgggtcattagaaatactcttttctaatactggtggttcctttattatcaactgagaatggtttataactccagggg  
gttctgcaaacagtcaaataattcgaaaaactaagacaacattatTTTTTcaactcaaagtgtggt--  
tgtaggataggcgac  
>Cateto\_Sulino\_URG 11\_AY108759  
taaacaggcagctgaaatccatctacacagcaacagcaataccatcttctaccaggtcctagacacggcttaagccgctg  
ttgcatgggtcattagaaatactcttttctaatactggtggttcctttattatcaactgagaatggtttataactccagggg  
gttctgcaaacagtcaaataattcgaaaaactaagacaacattatTTTTTcaactcaaagtgtggt--  
tgtaggataggcgac  
>Chalqueno\_MEX 48\_AY108759  
taaacaggcagctgaaatccatctacacagcaacagcaataccatcttctaccaggtcctagacacggcttaagccgctg  
ttgcatgggtcattagaaatactcttttctaatactggtggttcctttattatcaactgagaatggtttataactccagggg  
gttctgcaaacagtcaaataattcgaaaaactaagacaacattatTTTTTcaactcaaagtgtggt--  
tgtaggataggcgac  
>Chapalote\_SIN 2\_AY108759  
taaacaggcagctgaaatccatctacacagcaacagcaataccatcttctaccaggtcctagacacggcttaagccgctg  
ttgcatgggtcattagaaatactcttttctaatactggtggttcctttattatcaactgagaatggtttataactccagggg  
gttctgcaaacagtcaaataattcgaaaaactaagacaacattatTTTTTcaactcaaagtgtggt--  
tgtaggataggcgac

>Conico\_PUE 32\_AY108759

taaacaggcagctgaaatccatctacacagcaacagcaataccatcttctaccaggtcctagacacggcttaagccgctg  
ttgcatgggtcattagaaatactctttctaatactggttcctttattatcaactgagaatgttttataactccagggg  
gttctctgcaaacagtcaaataattcgaaaaactaagacaacattatTTTTTTcaactcaaagtgttggt--  
tgtaggataggcgac

>Cristalino Norteno\_CHI 349\_AY108759

taaacaggcagctgaaatccatctacacagcaacagcaataccatcttctaccaggtcctagacacggcttaagccgctg  
ttgcatgggtcattagaaatactctttctaatactggttcctttattatcaactgagaatgttttataactccagggg  
gttctctgcaaacagtcaaataattcgaaaaactaagacaacattatTTTTTTcaactcaaagtgtt-----  
-----

>Dzit Bacal\_GUA 131\_AY108759

taaacaggcagctgaaatccatctacacagcaacagcaataccatcttctaccaggtcctagacacggcttaagccgctg  
ttgcatgggtcattagaaatactctttctaatactggttcctttattatcaactgagaatgttttataactccagggg  
gttctctgcaaacagtcaaataattcgaaaaactaagacaacattatTTTTTTcaactcaaagtgttggt--  
tgtaggataggcgac

>Jalisco\_Benz 967\_AY108759

taaacaggcagctgaaatccatctacacagcaacagcaataccatcttctaccaggtcctagacacggcttaagccgctg  
ttgcatgggtcattagaaatactctttctaatactggttcctttattatcaactgagaatgttttataactccagggg  
gttctctgcaaacagtcaaataattcgaaaaactaagacaacattatTTTTTTcaactcaaagtgttggt--tgtag-----  
-----

>Balsas\_Beadle & Kato Site 4\_AY108759

taaacaggcagctgaaatccatctacacagcaacagcaataccatcttctaccaggtcctagacacggcttaagccgctg  
ttgcatgggtcattagaaatactctttctaatactggttcctttattatcaactgagaatgttttataactccagggg  
gttctctgcaaacagtcaaataattcgaaaaactaagacaacattatTTTTTTcaactcaaagtgttggt--  
tgtaggataggcgac

>Balsas\_Kato Site 4\_AY108759

taaacaggcagctgaaatccatctacacagcaacagcaataccatcttctaccaggtcctagacacggcttaagccgctg  
ttgcatgggtcattagaaatactctttctaatactggttcctttattatcaactgagaatgttttataactccagggg  
gttctctgcaaacagtcaaataattcgaaaaactaagacaacattatTTTTTTcaactcaaagtgttggt--  
tgtaggataggcgac

>Balsas\_Wilkes Site 6\_AY108759

taaacaggcagctgaaatccatctacacagcaacagcaataccatcttctaccaggtcctagacacggcttaagccgctg  
ttgcatgggtcattagaaatactctttctaatactggttcctttattatcaactgagaatgttttataactccagggg  
gttctctgcaaacagtcaaataattcgaaaaactaagacaacattatTTTTTTcaactcaaagtgttggt--  
tgtaggataggcgac

>Balsas\_INIFAP JSP y Lo5130\_AY108759

taaacaggcagctgaaatcaatctacacagcaacagcaataccatcttctaccaggtcctagacacggcttaagccgctg  
ttgcatgggtcattagaaatactctttctaatactggttcctttattatcaactgagaatgttttataactccagggg  
gttctctgcaaacagtcaaataattcgaaaaactaagacaacattatTTTTTTcaactcaaagtgttggt--  
tgtaggataggcgac

>Balsas\_INIFAP JSG y LOS 119\_AY108759

taaacaggcagctgaaatccatctacacagcaacagcaataccatcttctaccaggtcctagacacggcttaagccgctg  
ttgcatgggtcattagaaatactctttctaatactggttcctttattatcaactgagaatgttttataactccagggg  
gttctctgcaaacagtcaaataattcgaaaaactaagacaacattatTTTTTTcaactcaaagtgttggt--  
tgtaggataggcgac

>Jalisco\_INIFAP JSG y MAS 401\_AY108759

taaacaggcagctgaaatccatctacacagcaacagcaataccatcttctaccaggtcctagacacggcttaagccgctg  
ttgcatgggtcattagaaatactctttctaatactggttcctttattatcaactgagaatgttttataactccagggg  
gttctctgcaaacagtcaaataattcgaaaaactaagacaacattatTTTTTTcaactcaaagtgttggt--  
tgtaggataggcgac

>Balsas\_CIMMYT 8783\_AY108759

taaacaggcagctgaaatccatctacacagcaacagcaataccatcttctaccaggtcctagacacggcttaagccgctg  
ttgcatgggtcattagaaatactctttctaatactggttcctttattatcaactgagaatgttttataactccagggg  
gttctctgcaaacagtcaaataattcgaaaaactaagacaacattatTTTTTTcaactcaaagtgttggt--  
tgtaggataggcgac

>Oaxaca\_INIFAP JSG 197\_AY108759

taaacaggcagctgaaatccatctacacagcaacagcaataccatcttctaccaggtcctagacacggcttaagccgctg

ttgcatggggtcattagaaatactcttttctaatactggttcctttattatcaactgagaatgttttataactccagggg  
gttcctgcaaacagtcaaataattcgaaaaactaagacaacattatTTTTTcaactcaaatggtggt--  
tgtaggataggcgcac

>Balsas\_INIFAP JSG y LOS 109\_AY108759\_

taaacaggcagctgaaatccatctacacagcaacagcaataccatcttctaccaggtcctagacacggcttaagccgctg  
ttgcatggggtcattagaaatactcggttctaatactggttcctttattatcaactgagaatgttttataactccagggg  
gttcctgcaaacagtcaaataattcgaaaaactaagacaacattatTTTTTcaactcaaatggtggt--  
tgtaggataggcgcac

>Balsas\_INIFAP JSG 378\_AY108759

taaacaggcagctgaaatccatctacacagcaacagcaataccatcttctaccaggtcctagacacggcttaagccgctg  
ttgcatggggtcattagaaatactcttttctaatactggttcctttattatcaactgagaatgttttataactccagggg  
gttcctgcaaacagtcaaataattcgaaaaactaagacaacattatTTTTTcaactcaaatggtggt--  
tgtaggataggcgcac

>Balsas\_INIFAP JSG 374\_AY108759

taaacaggcagctgaaatccatctacacagcaacagcaataccatcttctaccaggtcctagacacggcttaagccgctg  
ttgcatggggtcattagaaatactcttttctaatactggttcctttattatcaactgagaatgttttataactccagggg  
gttcctgcaaacagtcaaataattcgaaaaactaagacaacattatTTTTTcaactcaa-----  
-----

>Balsas\_INIFAP JSG y LOS 161\_AY108759

taaacaggcagctgaaatccatctacacagcaacagcaataccatcttctaccaggtcctagacacggcttaagccgctg  
ttgcatggggtcattagaaatactcttttctaatactggttcctttattatcaactgagaatgttttataactccagggg  
gttcctgcaaacagtcaaataattcgaaaaactaagacaacggttatTTTTTcaactcaaatggtggt--  
tgtaggataggcgcac

>Balsas\_CIMMYT 11355\_AY108759

taaacaggcagctgaaatccatctacacagcaacagcaataccatcttctaccaggtcctagacacggcttaagccgctg  
ttgcatggggtcattagaaatactcttttctaatactggttcctttattatcaactgagaatgttttataactccagggg  
gttcctgcaaacagtcaaataattcgaaaaactaagacaacattatTTTTTcaactcaaatggtggt--  
tgtaggataggcgcac

>Balsas\_USDA PI566686\_AY108759

taaacaggcagctgaaatccatctacacagcaacagcaataccatcttctaccaggtcctagacacggcttaagccgctg  
ttgcatggggtcattagaaatactcttttctaatactggttcctttattatcaactgagaatgttttataactccagggg  
gttcctgcaaacagtcaaataattcgaaaaactaagacaacattatTTTTTcaactcaaatggtggt--  
tgtaggataggcgcac

>Jalisco\_INIFAP JSG y MAS 264\_AY108759

taaacaggcagctgaaatccatctacacagcaacagcaataccatcttctaccaggtcctagacacggcttaagccgctg  
ttgcatggggtcattagaaatactcttttctaatactggttcctttattatcaactgagaatgttttataactccagggg  
gttcctgcaaacagtcaaataattcgaaaaactaagacaacattatTTTTTcaactcaaatggtggt--  
tgtaggataggcgcac

>Tripsacum\_WW-2120\_AY108759

taaacaggcagctgaaatccatatacacaacagcagcaatgccatcttctaccaagtcttagacacggcttaagccgctg  
ttgcatggggtcattagaaatactcttttctaatactggttcctttattatcaactgagaatgttttataactccagggg  
-ttcctcaaacagtcaaataattcgaaaaactgagacaacattatTTT--  
tcaactcaaatggtggtactctctaataggcgcac

>B73\_AY108231

tgtgttttgacattgctatccttgcttttagccagctccatctttcggttagatacatacatgcatgggcatatccattttg  
aaacatgccaggagaaagctcactggctctagagcagggtaggtctcaagcgttggtgctgattgctgctgcatcggt  
g---  
catgcttgacatgtctagtaggatcagtatgctaacaataggcagggcttctgtaccatgatgacataagttccttctgt

>Oh43\_AY108231

tgtgttttgacattgctatccttgcttttagccagctccatctttcggttagatacatacatgcatgggcatatccattttg  
aaacatgccaggagaaagctcactggctctagagcagggtaggtctcaagcgttggtgctgattgctgctgcatcggt  
g---  
catgcttgacatgtctagtaggatcagtatgctaacaataggcagggcttctgtaccatgatgacataagttccttctgt

>IL14H\_AY108231

tgtgttttgacattgctatccttgcttttagccagctccatctttcggttagatacatacatgcatgggcatatccattttg

aaacatgccaggagaaagctcactggctctagagcagggtaggtctcaagcgttggtgcctgattgctgctgcatcggt  
g---catgcttgacatgtctagtaggatcagtatgctaacaatagggcagggtctctgtacatgatgacataag-----  
--  
>Mo17\_AY108231  
tgtgttttgacattgctatccttgctttagccagctccatctttcggtagatacacatgcatgggcatatccattttg  
aaacatgccaggagaaagctcactggctctagagcagggtaggtctcaagcgttggtgcctgattgctgctgcatcggt  
g---  
catgcttgacatgtctagtaggatcagtatgctaacaatagggcagggtctctgtacatgatgacataagttccttctgt  
>Ky21\_AY108231  
tgtgttttgacattgctatccttgctttagccagctccatctttcggtagatacacatgcatgggcatatccattttg  
aaacatgccaggagaaagctcactggctctagagcagggtaggtctcaagcgttggtgcctgattgctgctgcatcggt  
g---  
catgcttgacatgtctagtaggatcagtatgctaacaatagggcagggtctctgtacatgatgacataagttccttctgt  
>M37W\_AY108231  
tgtgttttgacattgctatccttgctttagccagctccatctttcggtagatacacatgcatgggcatatccattttg  
aaacatgccaggagaaagctcactggctctagagcagggtaggtctcaagcgttggtgcctgattgctgctgcatcggt  
g---catgcttgacatgtctagtaggatcagtatgctaacaatagggcagggtctctgtacatgatgacata-----  
--  
>HP301\_AY108231  
tgtgttttgacattgctatccttgctttagccagctccatctttcggtagatacacatgcatgggcatatccattttg  
aaacatgccaggagaaagctcactggctctagagcagggtaggtctcaagcgttggtgcctgattgctgctgcatcggt  
g---  
catgcttgacatgtctagtaggatcagtatgctaacaatagggcagggtctctgtacatgatgacataagttccttctgt  
>CML247\_AY108231  
tgtgttttgacattgctatccttgctttagccagctccatctttcggtagatacacatgcatgggcatatccattttg  
aaacatgccaggagaaagctcactggctctagagcagggtaggtctcaagcgttggtgcctgattgctgctgcatcggt  
g---catgcttgacatgtctagtaggatcagtatgctaacaatagggcagggtctctgtacatgatgacataagttcct---  
--  
>NC350\_AY108231  
-----  
gctatccttgctttagccagctccatctttcggtagatacacatgcatgggcatatccattttgaaacatgccaggag  
aaagctcactggctctagagcagggtaggtctcaagcgttggtgcctgattgctgctgcatcggtg---  
catgcttgacatgtctagtaggatcagtatgctaacaatagggcagggtctctgtacatgatgacataagtt-----  
>Ki3\_AY108231  
tgtgttttgacattgctatccttgctttagccagctccatctttcggtagatacacatgcatgggcatatccattttg  
aaacatgccaggagaaagctcactggctctagagcagggtaggtctcaagcgttggtgcctgattgctgctgcatcggt  
g---catgcttgacatgtctagtaggatcagtatgctaacaatagggcagggtctctgtacatgatgacataagttcct---  
--  
>Ki11\_AY108231  
tgtgttttgacattgctatccttgctttagccagctccatctttcggtagatacacatgcatgggcatatccattttg  
aaacatgccaggagaaagctcactggctctagagcagggtaggtctcaagcgttggtgcctgattgctgctgcatcggt  
g---  
catgcttgacatgtctagtaggatcagtatgctaacaatagggcagggtctctgtacatgatgacataagttccttctgt  
>CML333\_AY108231  
tgtgttttgacattgctatccttgctttagccagctccatctttcggtagatacacatgcatgggcatatccattttg  
aaacatgccaggagaaagctcactggctctagagcagggtaggtctcaagcgttggtgcctgattgctgctgcatcggt  
g---  
catgcttgacatgtctagtaggatcagtatgctaacaatagggcagggtctctgtacatgatgacataagttccttctgt  
>CML322\_AY108231  
tgtgttttgacattgctatccttgctttagccagctccatctttcggtagatacacatgcatgggcatatccattttg  
aaacatgccaggagaaagctcactggctctagagcagggtaggtctcaagcgttggtgcctgattgctgctgcatcggt  
g---  
catgcttgacatgtctagtaggatcagtatgctaacaatagggcagggtctctgtacatgatgacataagttccttctgt  
>CML69\_AY108231  
tgtgttttgacattgctatccttgctttagccagctccatctttcggtagatacacatgcatgggcatatccattttg  
aaacatgccaggagaaagctcactggctctagagcagggtaggtctcaagcgttggtgcctgattgctgctgcatcggt  
g---catgcttgacatgtctagtaggatcagtatgctaacaatagggcagggtctctgtacatgatgacataagtt-----



--

>Assinboine\_PI213793\_AY108231

tgtgttttgacattgctatccttgcttttagccagctccatctttcggtagatacatacatgcatgggcatatccattttg  
aaacatgccaggagaaagctcactggctctagagcagggttaggtctcaagcggtggtgacctgattgctgctgcatcggt  
g---

catgcttgacatgtctagtaggatcagtatgctaacaatagggcagggtctctgtacccatgatgacataagttccttctgt

>Gordo\_CHH 160\_AY108231

tgtgttttgacattgctatccttgcttttagccagctccatctttcggtagatacatacatgcatgggcatatccattttg  
aaacatgccaggagaaagctcactggctctagagcagggttaggtctcaagcggtggtgacctgattgctgctgcatcggt  
g---

catgcttgacatgtctagtaggatcagtatgctaacaatagggcagggtctctgtacccatgatgacataagttccttctgt

>Guirua\_MAG 450\_AY108231

tgtgttttgacattgctatccttgcttttagccagctccatctttcggtagatacatacatgcatgggcatatccattttg  
aaacatgccaggagaaagctcactggctctagagcagggttaggtctcaagcggtggtgacctgattgctgctgcatcggt  
g---

catgcttgacatgtctagtaggatcagtatgctaacaatagggcagggtctctgtacccatgatgacataagttccttctgt

>Nal-tel\_YUC 7\_AY108231

tgtgttttgacattgctatccttgcttttagccagctccatctttcggtagatacatacatgcatgggcatatccattttg  
aaacatgccaggagaaagctcactggctctagagcagggttaggtctcaagcggtggtgacctgattgctgctgcatcggt  
g---

catgcttgacatgtctagtaggatcagtatgctaacaatagggcagggtctctgtacccatgatgacataagttccttctgt

>Pisscotunto\_APC 13\_AY108231

tgtgttttgacattgctatccttgcttttagccagctccatctttcggtagatacatacatgcatgggcatatccattttg  
aaacatgccaggagaaagctcactggctctagagcagggttaggtctcaagcggtggtgacctgattgctgctgcatcggt  
g---

catgcttgacatgtctagtaggatcagtatgctaacaatagggcagggtctctgtacccatgatgacataagttccttctgt

>Sabanero\_SAN 329\_AY108231

tgtgttttgacattgctatccttgcttttagccagctccatctttcggtagatacatacatgcatgggcatatccattttg  
aaacatgccaggagaaagctcactggctctagagcagggttaggtctcaagcggtggtgacctgattgctgctgcatcggt  
g---

catgcttgacatgtctagtaggatcagtatgctaacaatagggcagggtctctgtacccatgatgacataagttccttctgt

>Serrano\_GUA 14\_AY108231

tgtgttttgacattgctatccttgcttttagccagctccatctttcggtagatacatacatgcatgggcatatccattttg  
aaacatgccaggagaaagctcactggctctagagcagggttaggtctcaagcggtggtgacctgattgctgctgcatcggt  
g---

catgcttgacatgtctagtaggatcagtatgctaacaatagggcagggtctctgtacccatgatgacataagttccttctgt

>Bolita\_OAX 68\_AY108231

tgtgttttgacattgctatccttgcttttagccagctccatctttcggtagatacatacatgcatgggcatatccattttg  
aaacatgccaggagaaagctcactggctctagagcagggttaggtctcaagcggtggtgacctgattgctgctgcatcggt  
g---

catgcttgacatgtctagtaggatcagtatgctaacaatagggcagggtctctgtacccatgatgacataagttccttctgt

>Chalqueno\_MEX 48\_AY108231

tgtgttttgacattgctatccttgcttttagccagctccatctttcggtagatacatacatgcatgggcatatccattttg  
aaacatgccaggagaaagctcactggctctagagcagggttaggtctcaagcggtggtgacctgattgctgctgcatcggt  
g---

catgcttgacatgtctagtaggatcagtatgctaacaatagggcagggtctctgtacccatgatgacataagttccttctgt

>Chapalote\_SIN 2\_AY108231

tgtgttttgacattgctatccttgcttttagccagctccatctttcggtagatacatacatgcatgggcatatccattttg  
aaacatgccaggagaaagctcactggctctagagcagggttaggtctcaagcggtggtgacctgattgctgctgcatcggt  
g---

catgcttgacatgtctagtaggatcagtatgctaacaatagggcagggtctctgtacccatgatgacataagttccttctgt

>Conico\_PUE 32\_AY108231

tgtgttttgacattgctatccttgcttttagccagctccatctttcggtagatacatacatgcatgggcatatccattttg  
aaacatgccaggagaaagctcactggctctagagcagggttaggtctcaagcggtggtgacctgattgctgctgcatcggt  
g---

catgcttgacatgtctagtaggatcagtatgctaacaatagggcagggtctctgtacccatgatgacataagttccttctgt

>Costeno\_VEN 453\_AY108231

tgtgttttgacattgctatccttgcttttagccagctccatctttcggtagatacatacatgcatgggcatatccattttg  
aaacatgccaggagaaagctcactggctctagagcagggtaggtctcaagcgttggtgcctgattgctgctgcatcggt  
g---  
catgcttgacatgtctagtaggatcagtatgctaacaatagggcagggcttctgtacccatatgacataagttccttctgt  
>Cristalino Norteno\_CHI 349\_AY108231  
tgtgttttgacattgctatccttgcttttagccagctccatctttcggtagatacatacatgcatgggcatatccattttg  
aaacatgccaggagaaagctcactggctctagagcagggtaggtctcaagcgttggtgcctgattgctgctgcatcggt  
g---  
catgcttgacatgtctagtaggatcagtatgctaacaatagggcagggcttctgtacccatatgacataagttccttctgt  
>Dzit Bacal\_GUA 131\_AY108231  
tgtgttttgacattgctatccttgcttttagccagctccatctttcggtagatacatacatgcatgggcatatccattttg  
aaacatgccaggagaaagctcactggctctagagcagggtaggtctcaagcgttggtgcctgattgctgctgcatcggt  
g---  
catgcttgacatgtctagtaggatcagtatgctaacaatagggcagggcttctgtacccatatgacataagttccttctgt  
>Jalisco\_Benz 967\_AY108231  
tgtgttttgacattgctatccttgcttttagccagctccatctttcggtacatacatacatgcatgggcatatccattttg  
aaacatgccaggagaaagctcactggctctagagcagggtaggtctcaagcgttggtgcctgattgctgctgcatcggt  
g---  
catgcttgacatgtctagtaggatcagtatgctaacaatagggcagggcttctgtacccatatgacataagttccttctgt  
>Balsas\_Beadle & Kato Site 4\_AY108231  
tgtgttttgacattgctatccttgcttttagccagctccatctttcggtagatacatacatgcatgggcatatccattttg  
aaacatgccaggagaaagctcactggctctagagcagggtaggtctcaagcgttggtgcctgattgctgctgcatcggt  
g---  
catgcttgatgatgtctagtaggatcagtatgctaacaatagggcagggcttctgtacccatatgacataagttccttctgt  
>Balsas\_Kato Site 4\_AY108231  
tgtgttttgacattgctatccttgcttttagccagctccatctttcggtagatacatacatgcatgggcatatccattttg  
aaacatgccaggagaaagctcactggctctagagcagggtaggtctcaagcgttggtgcctgattgctgctgcatcggt  
g---  
catgcttgatgatgtctagtaggatcagtatgctaacaatagggcagggcttctgtacccatatgacataagttccttctgt  
>Balsas\_Wilkes Site 6\_AY108231  
tgtgttttgacattgctatccttgcttttagccagctccatctttcggtagatacatacatgcatgggcatatccattttg  
aaacatgccaggagaaagctcactggctctagagcagggtaggtctcaagcgttggtgcctgattgctgctgcatcggt  
g---  
catgcttgatgatgtctagtaggatcagtatgctaacaatagggcagggcttctgtacccatatgacataagttccttctgt  
>Balsas\_INIFAP JSP y Lo5130\_AY108231  
tgtgttttgacattgctatccttgcttttagccagctccatctttcggtagatacatacatgcatgggcatatccattttg  
aaacatgccaggagaaagctcactggctctagagcagggtaggtctcaagcgttggtgcctgattgctgctgcatcggt  
ggtgcatgcttgacatgtctagtaggatcagtatgctaacaatagggcagggcttctgtacccatatgacataagttccttct  
gt  
>Balsas\_INIFAP JSG y LOS 119\_AY108231  
tgtgttttgacattgctatccttgcttttagccagctccatctttcggtagatacatacatgcatgggcatatccattttg  
aaacatgccaggagaaagctcactggctctagagcagggtaggtctcaagcgttggtgcctgattgctgctgcatcggt  
g---  
catgcttgacatgtctagtaggatcagtatgctaacaatagggcagggcttctgtacccatatgacataagttccttctgt  
>Jalisco\_INIFAP JSG y MAS 401\_AY108231  
tgtgttttgacattgctatccttgcttttagccagctccatctttcggtagatacatacatgcatgggcatatccattttg  
aaacatgccaggagaaagctcactggctctagagcagggtaggtctcaagcgttggtgcctgattgctgctgcatcggt  
g---  
catgcttgacatgtctagtaggatcagtatgctaacaatagggcagggcttctgtacccatatgacataagttccttctgt  
>Balsas\_CIMMYT 8783\_AY108231  
tgtgttttgacattgctatccttgcttttagccagctccatctttcggtagatacatacatgcatgggcatatccattttg  
aaacatgccaggagaaagctcactggctctagagcagggtaggtctcaagcgttggtgcctgattgctgctgcatcggt  
g---  
catgcttgacatgtctagtaggatcagtatgctaacaatagggcagggcttctgtacccatatgacataagttccttctgt  
>Oaxaca\_INIFAP JSG 197\_AY108231  
tgtgttttgacattgctatccttgcttttagccagctccatctttcggtagatacatacatgcatgggcatatccattttg  
aaacatgccaggagaaagctcactggctctagagcagggtaggtctcaagcgttggtgcctgattgctgctgcatcggt

g---  
catgcttgacatgtctagtaggatcagtatgctaacaatagggcaggtcttctgtaccatatgacataagttccttctgt  
>Balsas\_INIFAP JSG y LOS 109\_AY108231  
tgtgttttgacattgctatccttgcttttagccagctccatctttcggtagatacatacatgcatgggcatatccattttg  
aaacatgccaggagaaagctcactggctctagagcagggtaggtctcaagcgttggtgcctgattgctgctgcatcggt  
g---  
catgcttgatgatgtctagtaggatcagtatgctaacaatagggcagggcttctgtaccatatgacataagttccttctgt  
>Balsas\_INIFAP JSG 378\_AY108231  
tgtgttttgacattgctatccttgcttttagccagctccatctttcggtagatacatacatgcatgggcatatccattttg  
aaacatgccaggagaaagctcactggctctagagcagggtaggtctcaagcgttggtgcctgattgctgctgcatcggt  
g---  
catgcttgacatgtctagtaggatcagtatgctaacaatagggcagggcttctgtaccatatgacataagttccttctgt  
>Balsas\_INIFAP JSG 374\_AY108231  
tgtgttttgacattgctatccttgcttttagccagctccatctttcggtagatacatacatgcatgggcatatccattttg  
aaacatgccaggagaaagctcactggctctagagcagggtaggtctcaagcgttggtgcctgattgctgctgcatcggt  
g---  
catgcttgacatgtctagtaggatcagtatgctaacaatagggcagggcttctgtaccatatgacataagttccttctgt  
>Balsas\_INIFAP JSG y LOS 161\_AY108231  
tgtgttttgacattgctatccttgcttttagccagctccatctttcggtagatacatacatgcatgggcatatccattttg  
aaacatgccaggagaaagctcactggctctagagcagggtaggtctcaagcgttggtgcctgattgctgctgcatcggt  
g---  
catgcttgacatgtctagtaggatcagtatgctaacaatagggcagggcttctgtaccatatgacataagttccttctgt  
>Balsas\_CIMMYT 11355\_AY108231  
tgtgttttgacattgctatccttgcttttagccagctccatctttcggtagatacatacatgcatgggcatatccattttg  
aaacatgccaggagaaagctcactggctctagagcagggtaggtctcaagcgttggtgcctgattgctgctgcatcggt  
g---  
catgcttgacatgtctagtaggatcagtatgctaacaatagggcagggcttctgtaccatatgacataagttccttctgt  
>Balsas\_USDA PI566686\_AY108231  
tgtgttttgacattgctatccttgcttttagccagctccatctttcggtagatacatacatgcatgggcatatccattttg  
aaacatgccaggagaaagctcactggctctagagcagggtaggtctcaagcgttggtgcctgattgctgctgcatcggt  
g---catgcttgacatgtcta-  
taggatcagtatgctaacaatagggcagggcttctgtaccatatgacataagttccttctgt  
>Jalisco\_INIFAP JSG y MAS 264\_AY108231  
tgtgttttgacattgctatccttgcttttagccagctccatctttcggtagatacatacatgcatgggcatatccattttg  
aaacatgccaggagaaagctcactggctctagagcagggtaggtctcaagcgttggtgcctgattgctgctgcatcggt  
g---  
catgcttgacatgtctagtaggatcagtatgctaacaatagggcagggcttctgtaccatatgacataagttccttctgt  
>Tripsacum\_WW-2120\_AY108231  
tgtgttttgacattgctatccttgcttttagccagctccatctttcggtagatacatacatgcatgggcatatccattttg  
aaacatgccaggagaaagctcactggctctagagcagggtaggtctcaagcgttggtgcctgattgctgctgcatcggt  
g---  
catgcttgatgatgtctagtaggatcagtatgctaacaatagggcagggcttctgtaccatatgacataagttccttctgt

>B73\_AY106616

-

ttggcgcgcagggcctcaccgtggaggactcggcgagcgggagcagacagcaagatggtcaagcagcagtgccctcagg  
gtgtcctgattgacgg-cgtgggtgtctcgactacaacag-----  
cgtgggtgtgattgggttgggtgtctcgcgtgcagctatgtgtgcttggttggctttgctccttg-----  
cacagccagcgggtgaactgggtgatccaatgaacttgtgcttgtgtt  
>Oh43\_AY106616

-

ttggcgcgcagggcctcaccgtggaggactcggcgagcgggagcagacagcaagatggtcaagcagcagtgccctcagg  
gtgtcctgattgacgg-cgtgggtgtctcgactacaacag-----  
cgtgggtgtgattgggttgggtgtctcgcgtgcagctatgtgtgcttggttggctttgctccttg-----  
cacagccagcgggtgaactgggtgatccaatgaacttgtgc-----

>IL14H\_AY106616

-

ttggcgcgagggcctcaccgtggaggactcggcgagcgggcagcagacgagcaagatggtcaagcagcagtgctcagg  
gtgtcctgattgacgg-cgtggtgtctcgactacaacag-----  
cgtggtgtgattgggttgggtgtctcgcgtgcagctatgtgtgcttgtttgctttgctccttg-----  
cacagccagcgggtgaactggtgatccaatgaacttgtgcttgtgtt

>Mo17\_AY106616

ttggcgcgagggcctcaccgtggaggactcggcgagcgggcagcagacgagcaagatggtcaagcagcagtgctcag  
ggtgtcctgattgacgg-cgtggtgtctcgactacaacag-----  
cgtggtgtgattgggttgggtgtctcgcgtgcagctatgtgtgcttgtttgctttgctccttg-----  
cacagccagcgggtgaactggtgatccaatgaacttgtgcttgtgtt

>Ky21\_AY106616

--

tggcgcgagggcctcaccgtggaggactcggcgagcgggcagcagacgagcaagatggtcaagcagcagtgctcaggg  
tgtcctgattgacgg-cgtggtgtctcgactacaacag-----  
cgtggtgtgattgggttgggtgtctcgcgtgcagctatgtgtgcttgtttgctttgctccttg-----  
cacagccagcgggtgaactggtgatccaatgaacttg-----

>M37W\_AY106616

-

ttggcgcgagggcctcaccgtggaggactcggcgagcgggcagcagacgagcaagatggtcaagcagcagtgctcagg  
gtgtcctgattgacgg-cgtggtgtctcgactacaacag-----  
cgtggtgtgattgggttgggtgtctcgcgtgcagctatgtgtgcttgtttgctttgctccttg-----  
cacagccagcgggtgaactggtgatccaatgaactt-----

>HP301\_AY106616

ttggcgcgagggcctcaccgtggaggactcggcgagcgggcagcagacgagcaagatggtcaagcagcagtgctcag  
ggtgtcctgattgacgg-cgtggtgtctcgactacaacag-----  
cgtggtgtgattgggttgggtgtctcgcgtgcagctatgtgtgcttgtttgctttgctccttg-----  
cacagccagcgggtgaactggtgatccaatgaactt-----

>CML247\_AY106616

ttggcgcgagggcctcaccgtggaggactcggcgagcgggcagcagacgagcaagatggtcaagcagcagtgctcag  
ggtgtcctgattgacgg-cgtggtgtctcgactacaacag-----  
cgtggtgtgattgggttgggtgtctcgcgtgcagctatgtgtgcttgtttgctttgctccttg-----  
cacagccagcgggtgaactggtgatccaatgaactt-----

>NC350\_AY106616

-

ttggcgcgagggcctcaccgtggaggactcggcgagcgggcagcagacgagcaagatggtcaagcagcagtgctcagg  
gtgtcctgattgacgg-cgtggtgtctcgactacaacag-----  
cgtggtgtgattgggttgggtgtctcgcgtgcagctatgtgtgcttgtttgctttgctccttg-----  
cacagccagcgggtgaactggtgatccaatgaacttgtgc-----

>Ki3\_AY106616

-----

gcgagggcctcaccgtggaggactcggcgagcgggcagcagacgagcaagatggtcaagcagcagtgctcaggggtgc  
ctgattgacgg-cgtggtgtctcgactacaacag-----  
cgtggtgtgattgggttgggtgtctcgcgtgcagctatgtgtgcttgtttgctttgctccttg-----  
cacagccagcgggtgaactggtgatccaatgaacttg-----

>Kill\_AY106616

ttggcgcgagggcctcaccgtggaggactcggcgagcgggcagcagacgagcaagatggtcaagcagcagtgctcag  
ggtgtcctgattgacgg-cgtggtgtctcgactacaacag-----  
cgtggtgtgattgggttgggtgtctcgcgtgcagctatgtgtgcttgtttgctttgctccttg-----  
cacagccagcgggtgaactggtgatccaatgaactt-----

>CML333\_AY106616

ttggcgcgagggcctcaccgtggaggactcggcgagcgggcagcagacgagcaagatggtcaagcagcagtgctcag  
ggtgtcctgattgacgg-cgtggtgtctcgactacaacag-----  
cgtggtgtgattgggttgggtgtctcgcgtgcagctatgtgtgcttgtttgctttgctccttg-----  
cacagccagcgggtgaactggtgatccaatgaact-----

>CML322\_AY106616

-

ttggcgcgagggcctcaccgtggaggactcggcgagcgggcagcagacgagcaagatggttcaagcagcagtgctcagg  
gtgtcctgattgacgg-cgtggtgtctcgactacaacag-----  
cgtggtgtgattgggttgggtgtctcgcgtgcagctatgtgtgcttgtttgctttgctccttg-----  
cacagccagcgggtgaactgggtgatccaatgaactt-----  
>CML69\_AY106616  
--  
ttggcgcgagggcctcaccgtggaggactcggcgagcgggcagcagacgagcaagatggttcaagcagcagtgctcaggg  
tgtcctgattgacgg-cgtggtgtctcgactacaacag-----  
cgtggtgtgattgggttgggtgtctcgcgtgcagctatgtgtgcttgtttgctttgctccttg-----  
cacagccagcgggtgaactgggtgatccaatgaactt-----  
>Assinboine\_PI213793\_AY106616  
ttggcgcgagggcctcaccgtggaggactcggcgagcgggcagcagacgagcaagatggttcaagcagcagtgctcag  
ggtgtcctgattgacgg-cgtggtgtctcgactacaacag-----  
cgtggtgtgattgggttgggtgtctcgcgtgcagctatgtgtgcttgtttgctttgctccttg-----  
cacagccagcgggtgaactgggtgatccaatgaacttgtgcttgtggt  
>Gordo\_CHH 160\_AY106616  
ttggcgcgagggcctcaccgtggaggactcggcgagcgggcagcagacgagcaagatggttcaagcagcagtgctcag  
ggtgtcctgattgacgg-cgtggtgtctcgactacaaccaacag-----  
cgtggtgtgattgggttgggtgtctcgcgtgcagctatgtgtgcttgtttattttgctccttg-----  
cacagccagcgggtgaactgggtgatccaatgaacttgtgcttgtggt  
>Guirua\_MAG 450\_AY106616  
ttggcgcgagggcctcaccgtggaggactcggcgagcgggcagcagacgagcaagatggttcaagcagcagtgctcag  
ggtgtcctgattgacgg-cgtggtgtctcgactacaacag-----  
cgtggtgtgattgggttgggtgtctcgcgtgcagctatgtgtgcttgtttgctttgctccttg-----  
cacagccagcgggtgaactgggtgatccaatgaacttgtgcttgtggt  
>Nal-tel\_YUC 7\_AY106616  
ttggcgcgagggcctcaccgtggaggactcggcgagcgggcagcagacgagcaagatggttcaagcagcagtgctcag  
ggtgtcctgattgacgg-cgtggtgtctcgactacaacag-----  
cgtggtgtgattgggttgggtgtctcgcgtgcagctatgtgtgcttgtttgctttgctccttg-----  
cacagccagcgggtgaactgggtgatccaatgaacttgtgcttgtggt  
>Pisscotunto\_APC 13\_AY106616  
ttggcgcgagggcctcaccgtggaggactcggcgagcgggcagcagacgagcaagatggttcaagcagcagtgctcag  
ggtgtcctgattgacgg-cgtggtgtctcgactacaacag-----  
cgtggtgtgattgggttgggtgtctcgcgtgcagctatgtgtgcttgtttgctttgctccttg-----  
cacagccagcgggtgaactgggtgatccaatgaacttgtgcttgtggt  
>Sabanero\_SAN 329\_AY106616  
ttggcgcgagggcctcaccgtggaggactcggcgagcgggcagcagacgagcaagatggttcaagcagcagtgctcag  
ggtgtcctgattgacgg-cgtggtgtctcgactacaacag-----  
cgtggtgtgattgggttgggtgtctcgcgtgcagctatgtgtgcttgtttgctttgctccttg-----  
cacagccagcgggtgaactgggtgatccaatgaacttgtgcttgtggt  
>Serrano\_GUA 14\_AY106616  
ttggcgcgagggcctcaccgtggaggactcggcgagcgggcagcagacgagcaagatggttcaagcagcagtgctcag  
ggtgtcctgattgacgg-cgtggtgtctcgactacaacag-----  
cgtggtgtgattgggttgggtgtctcgcgtgcagctatgtgtgcttgtttgctttgctccttg-----  
cacagccagcgggtgaactgggtgatccaatgaacttgtgcttgtggt  
>Zapalote Chico\_OAX 70\_AY106616  
ttggcgcgagggcctcaccgtggaggactcggcgagcgggcagcagacgagcaagatggttcaagcagcagtgctcag  
ggtgtcctgattgacgg-cgtggtgtctcgactacaacag-----  
cgtggtgtgattgggttgggtgtctcgcgtgcagctatgtgtgcttgtttgctttgctccttg-----  
cacagccagcgggtgaactgggtgatccaatgaacttgtgcttgtggt  
>Bolita\_OAX 68\_AY106616  
ttggcgcgagggcctcaccgtggaggactcggcgagcgggcagcagacgagcaagatggttcaagcagcagtgctcag  
ggtgtcctgattgacgg-cgtggtgtctcgactacaacag-----  
cgtggtgtgattgggttgggtgtctcgcgtgcagctatgtgtgcttgtttgctttgctccttg-----  
cacagccagcgggtgaactgggtgatccaatgaacttgtgcttgtggt  
>Cateto Sulino\_URG 11\_AY106616  
ttggcgcgagggcctcaccgtggaggactcggcgagcgggcagcagacgagcaagatggttcaagcagcagtgctcag

ggtgtcctgattgacgg-cgtggtgtctcgactacaacag-----  
cgtggtgtgattgggtttggtgtctcgcgtgcagctatgtgtgcttgtttgctttgctccttg-----  
cacagccagcgggtgaactgggtgatccaatgaacttgtgcttgtggt  
>Chalqueno\_MEX 48\_AY106616  
tttggcgcgcagggcctcaccgtggaggactcggcgagcgggcagcagacgagcaagatggtcaagcagcagtgctcag  
ggtgtcctgattgacgg-cgtggtgtctcgactacaaccaacag-----  
cgtggtgtgattgggtttcgtgtctcgcgtgcagctatgtgtgcttgtttattttgctccttg-----  
cacagccagcgggtgaactgggtgatccaatgaacttgtgcttgtggt  
>Chapalote\_SIN 2\_AY106616  
-----  
tcggcgagcgggcagcagacgagcaagatggtcaagcagcagtgctcaggggtgtcctgattgacgg-  
cgtggtgtctcgactgcaaccaacag-----  
cgtggtgtgattgggtttcgtgtctcgcgtgcagctatgtgtgcttgtttgctttgctccttg-----  
cacagccagcgggtgaactgggtgatccaatgaacttgtgcttgtggt  
>Conico\_PUE 32\_AY106616  
tttggcgcgcagggcctcaccgtggaggactcggcgagcgggcagcagacgagcaagatggtcaagcagcagtgctcag  
ggtgtcctgattgacgg-cgtggtgtctcgactacaaccaacag-----  
cgtggtgtgattgggtttcgtgtctcgcgtgcagctatgtgtgcttgtttgctttgctccttg-----  
cacagccagcgggtgaactgggtgatccaatgaacttgtgcttgtggt  
>Costeno\_VEN 453\_AY106616  
tttggcgcgcagggcctcaccgtggaggactcggcgagcgggcagcagacgagcaagatggtcaagcagcagtgctcag  
ggtgtcctgattgacgg-cgtggtgtctcgactacaacag-----  
cgtggtgtgattgggtttggtgtctcgcgtgcagctatgtgtgcttgtttgctttgctccttg-----  
cacagccagcgggtgaactgggtgatccaatgaacttgtgcttgtggt  
>Cristalino Norteno\_CHI 349\_AY106616  
tttggcgcgcagggcctcaccgtggaggactcggcgagcgggcagcagacgagcaagatggtcaagcagcagtgctcag  
ggtgtcctgattgacgg-cgtggtgtctcgactacaacag-----  
cgtggtgtgattgggtttggtgtctcgcgtgcagctatgtgtgcttgtttgctttgctccttg-----  
cacagccagcgggtgaactgggtgatccaatgaacttgtgcttgtggt  
>Dzit Bacal\_GUA 131\_AY106616  
tttggcgcgcagggcctcaccgtggaggactcggcgagcgggcagcagacgagcaagatggtcaagcagcagtgctcag  
ggtgtcctgattgacgg-cgtggtgtctcgactacaacag-----  
cgtggtgtgattgggtttggtgtctcgcgtgcagctatgtgtgcttgtttgctttgctccttg-----  
cacagccagcgggtgaactgggtgatccaatgaacttgtgcttgtggt  
>Jalisco\_Benz 967\_AY106616  
tttggcgcgcagggcctcaccgtggaggactcggcgagcgggcagcagacgagcaagatggtcaagcagcagtgctcag  
ggtgtcctgattgacgg-cgtggtgtctcgactacaacag-----  
cgtggtgtgattgggtttggtgtctcgcgtgcagctatgtgtgcttgtttgctttgctccttg-----  
cacagccagcgggtgaactgggtgatccaatgaacttgtgcttgtggt  
>Balsas\_Beadle & Kato Site 4\_AY106616  
tttggcgcgcagggcctcaccgtggaggactcggcgagcgggcagcagacgagcaagatggtcaagcagcagtgctcag  
ggtgtcctgattgacgg-cgtggtgtctcgactacaaccaacag-----  
cgtggtgtgattgggtttcgtgtctcgcgtgcagc-atgtgtgcttgtttgctttgctccttg-----  
cacagccagcgggtgaactgggtgatccaatgaacttgtgcttgtggt  
>Balsas\_Kato Site 4\_AY106616  
tttggcgcgcagggcctcaccgtggaggactcggcgagcgggcagcagacgagcaagatggtcaagcagcagtgctcag  
ggtgtcctgattgacgg-cgtggtgtctcgactacaacag-----  
cgtggtgtgattgggtttggtgtctcgcgtgcagctatgtgtgcttgtttgctttgctccttg-----  
cacagccagcgggtgaactgggtgatccaatgaacttgtgcttgtggt  
>Balsas\_Wilkes Site 6\_AY106616  
tttggcgcgcagggcctcaccgtggaggactcggcgagcgggcagcagacgagcaagatggtcaagcagcagtgctcag  
ggtgtcctgattgacgg-cgtggtgtctcgactacaaccaacag-----  
cgtggtgtgattgggtttcgtgtctcgcgtgcagctatgtgtgcttgtttgctttgctccttg-----  
cacagccagcgggtgaactgggtgatccaatgaacttgtgcttgtggt  
>Balsas\_INIFAP JSP y Lo5130\_AY106616  
tttggcgcgcagggcctcaccgtggaggactcggcgagcgggcagcagacgagcaagatggtcaagcagcagtgctcag  
ggtgtcctgattgacgg-cgtggtgtctcgactacaacag-----

cgtggtgtgattgggtttggtgtctcgcgtgcagctatgtgtgcttgtttgctttgctccttg-----  
cacagccagcgggtgaactggatccaatgaacttgtgcttgtgtt  
>Balsas\_INIFAP JSG y LOS 119\_AY106616  
tttggcgcgcagggcctcaccgtggaggactcggcgagcgggcagcagacgagcaagatggtcaagcagcagtgctcag  
ggtgtcctgattgacgg-cgtggtgtctcgactacaaccaacag-----  
cgtggtgtgattgggtttcgtgtctcgcgtgcagctatgtgtgcttgtttgctttgctccttg-----  
cacagccagcgggtgaactggatccaatgaacttgtgcttgtgtt  
>Jalisco\_INIFAP JSG y MAS 401\_AY106616  
tttggcgcgcagggcctcaccgtggaggactcggcgagcgggcagcagacgagcaagatggtcaagcagcagtgctcag  
ggtgtcctgattgacgg-cgtggtgtctcgactacaacag-----  
cgtggtgtgattgggtttggtgtctcgcgtgcagctatgtgtgcttgtttgctttgctccttg-----  
cacagccagcgggtgaactggatccaatgaacttgtgcttgtgtt  
>Balsas\_CIMMYT 8783\_AY106616  
tttggcgcgcagggcctcaccgtggaggactcggcgagcgggcagcagacgagcaagatggtcaagcagcagtgctcag  
ggtgtcctgattgacgg-cgtggtgtctcgactacaaccaacag-----  
cgtggtgtgattgggtttcgtgtctcgcgtgcagc-atgtgtgcttgtttgctttgctccttg-----  
cacagccagcgggtgaactggatccaatgaacttgtgcttgtgtt  
>Oaxaca\_INIFAP JSG 197\_AY106616  
tttggcgcgcagggcctcaccgtggaggactcggcgagcgggcagcagacgagcaagatggtcaagcagcagtgctcag  
ggtgtcctgattgacgg-cgtggtgtctcgactacaacag-----  
cgtggtgtgattgggtttggtgtctcgcgtgcagctatgtgtgcttgtttgctttgctccttg-----  
cacagccagcgggtgaactggatccaatgaacttgtgcttgtgtt  
>Balsas\_INIFAP JSG y LOS 109\_AY106616  
tttggcgcgcagggcctcaccgtggaggactcggcgagcgggcagcagacgagcaagatggtcaagcagcagtgctcag  
ggtgtcctgattgacgg-cgtggtgtctcgactacaaccaacag-----  
cgtggtgtgattgggtttcgtgtctcgcgtgcagctatgtgtgcttgtttgctttgctccttg-----  
cacagccagcgggtgaactggatccaatgaacttgtgcttgtgtt  
>Balsas\_INIFAP JSG 378\_AY106616  
tttggcgcgcagggcctcaccgtggaggactcggcgagcgggcagcagacgagcaagatggtcaagcagcagtgctcag  
ggtgtcctgattgacgg-cgtggtgtctcgactacaaccaacag-----  
cgtggtgtgattgggtttcgtgtctcgcgtgcagctatgtgtgcttgtttgctttgctccttg-----  
cacagccagcgggtgaactggatccaatgaacttgtgcttgtgtt  
>Balsas\_INIFAP JSG 374\_AY106616  
tttggcgcgcagggcctcaccgtggaggactcggcgagcgggcagcagacgagcaagatggtcaagcagcagtgctcag  
ggtgtcctgattgacgg-cgtggtgtctcgactacaaccaacag-----  
cgtggtgtgattgggtttcgtgtctcgcgtgcagctatgtgtgcttgtttgctttgctccttg-----  
cacagccagcgggtgaactggatccaatgaacttgtgcttgtgtt  
>Balsas\_INIFAP JSG y LOS 161\_AY106616  
tttggcgcgcagggcctcaccgtggaggactcggcgagcgggcagcagacgagcaagatggtcaagcagcagtgctcag  
ggtgtcctgattgacgg-cgtggtgtctcgactacaaccaacag-----  
cgtggtgtgattgggtttcgtatctcgcgtgcagctatgtgtgcttgtttgctttgctccttg-----  
cacagccagcgggtgaactggatccaatgaacttgtgcttgtgtt  
>Balsas\_CIMMYT 11355\_AY106616  
tttggcgcgcagggcctcaccgtggaggactcggcgagcgggcagcagacgagcaagatggtcaagcagcagtgctcag  
ggtgtcctgattgacgg-cgtggtgtctcgactacaaccaacag-----  
cgtggtgtgattgggtttcgtgtctcgcgtgcagc-atgtgtgcttgtttgctttgctccttg-----  
cacagccagcgggtgaactggatccaatgaacttgtgcttgtgtt  
>Balsas\_USDA PI566686\_AY106616  
tttggcgcgcagggcctcaccgtggaggactcggcgagcgggcagcagacgagcaagatggtcaagcagcagtgctcag  
ggtgtcctgattgacggcgtggtgtctcgactacaaccaacag-----  
cgtggtgtgattgggtttcgtgtctcgcgtgcagctatgtgtgcttgtttgctttgctccttg-  
gctccttgccagccagcgggtgaactggatccaatgaacttgtgcttgtgtt  
>Jalisco\_INIFAP JSG y MAS 264\_AY106616  
tttggcgcgcagggcctcaccgtggaggactcggcgagcgggcagcagacgagcaagatggtcaagcagcagtgctcag  
ggtgtcctgattgacgg-cgtggtgtctcgactacaacag-----  
cgtggtgtgattgggtttggtgtctcgcgtgcagctatgtgtgcttgtttgctttgctccttg-----  
cacagccagcgggtgaactggatccaatgaacttgtgcttgtgtt

>Tripsacum\_WW-2120\_AY106616

tttggcgcgcagggcctcaccgtggaggactcggcgagcgggacagcagacgagcaagatggtcaaacagcagtgctcag  
ggtgtcctgattgacgg-  
cgtataacgcccactccaaccaacagcgtgcattgtatcatacagcgtggtgtgattgggttctcgtatctcgcgtgcagct  
atgctgtgcttgtttgctttgttgtgcatgctccttgcacagccagcggggaactgggtgatccaatgaacttgtgcttgtg  
tt

>B73\_AY106734

--

ttaccaatgcaaaccaagttggtgagctggtgaagatggcagtagcccgcgggatgggtgctttattggggctgggggca  
aagatgagaagataccacagatgagatgacgctgcaggtgttcatctttgtacaaagaccacaccagaggagcagcaag  
aaatttgctaccagcaagaaatttgtaacacatttgcgaggttgggcttttgttgtggcttgtttgctttgcagactt-

>Oh43\_AY106734

gattaccaatgcaaaccaagttggtgagctggtgaagatggcagtagcccgcgggatgggtgctttattggggctggggg  
caaagatgagaagataccacagatgagatgacgctgcaggtgttcatctttgtacaaagaccacaccagaggagcagca  
agaaatttgctaccagcaagaaatttgtaacacatttgcgaggttgggcttttgttgtggcttgtttgctttgcagact  
--

>IL14H\_AY106734

gattaccaatgcaaaccaagttggtgagctggtgaagatggcagtagcccgcgggatgggtgctttattggggctggggg  
caaagatgagaagataccacagatgagatgacgctgcaggtgttcatctttgtacaaagaccacaccagaggagcagca  
agaaatttgctaccagcaagaaatttgtaacacatttgcgaggttgggcttttgttgtggcttgtttgctttgcagact  
tg

>Mo17\_AY106734

gattaccaatgcaaaccaagttggtgagctggtgaagatggcagtagcccgcgggatgggtgctttattggggctggggg  
caaagatgagaagataccacagatgagatgacgctgcaggtgttcatctttgtacaaagaccacaccagaggagcagca  
agaaatttgctaccagcaagaaatttgtaacacatttgcgaggttgggcttttgttgtggcttgtttgctttgcagact  
tg

>Ky21\_AY106734

--

ttaccaatgcaaaccaagttggtgagctggtgaagatggcagtagcccgcgggatgggtgctttattggggctgggggca  
aagatgagaagataccacagatgagatgacgctgcaggtgttcatctttgtacaaagaccacaccagaggagcagcaag  
aaatttgctaccagcaagaaatttgtaacacatttgcgaggttgggcttttgttgtggcttgtttgctttgcagacttg

>M37W\_AY106734

-----

gcaaaccaagttggtgagctggtgaagatggcagtagcccgcgggatgggtgctttattggggctgggggcaaagatgag  
aagataccacagatgagatgacgctgcaggtgttcatctttgtacaaagaccacaccagaggagcagcaagaaatttgc  
taccagcaagaaatttgtaacacatttgcgaggttgggcttttgttgtggcttgtttgctttgcagacttg

>HP301\_AY106734

gattaccaatgcaaaccaagttggtgagctggtgaagatggcagtagcccgcgggatgggtgctttattggggctggggg  
caaagatgagaagataccacagatgagatgacgctgcaggtgttcatctttgtacaaagaccacaccagaggagcagca  
agaaatttgctaccagcaagaaatttgtaacacatttgcgaggttgggcttttgttgtggcttgtttgctttgcagact  
--

>CML247\_AY106734

-----

caaaccaagttggtgagctggtgaagatggcagtagcccgcgggatgggtgctttattggggctgggggcaaagatgaga  
agataccacagatgagatgacgctgcaggtgttcatctttgtacaaagaccacaccagaggagcagcaagaaatttgc  
accagcaagaaatttgtaacacatttgcgaggttgggcttttgttgtggcttgtttgctttgcagacttg

>NC350\_AY106734

-

attaccaatgcaaaccaagttggtgagctggtgaagatggcagtagcccgcgggatgggtgctttattggggctggggg  
aaagatgagaagataccacagatgagatgacgctgcaggtgttcatctttgtacaaagaccacaccagaggagcagcaa  
gaaatttgctaccagcaagaaatttgtaacacatttgcgaggttgggcttttgttgtggcttgtttgcttt-----  
-

>Ki3\_AY106734

gattaccaatgcaaaccaagttggtgagctggtgaagatggcagtagcccgcgggatgggtgctttattggggctggggg



caaagatgagaagataccacagatgagatgacgctgcaggtgttcatcttttgtacaaagaccacaccagaggagcagca  
agaaatgtgctaccagcaagaaatgttaacacatttgcgaggttgggcttttgttggcttgtttgctttgcagact  
--

>Kill\_AY106734

---

taccaatgcaaaccaagttggtgagctggtgaagtatggcagtagccgcgggatgggtgctttattggggctgggggcaa  
agatgagaagataccacagatgagatgacgctgcaggtgttcatcttttgtacaaagaccacaccagaggagcagcaaga  
aatttgcctaccagcaagaaatgttaacacatttgcgaggttgggcttttgttggcttgtttgctttg-----

>CML333\_AY106734

gattaccaatgcaaaccaagttggtgagctggtgaagtatggcagtagccgcgggatgggtgctttattggggctggggg  
caaagatgagaagataccacagatgagatgacgctgcaggtgttcatcttttgtacaaagaccacaccagaggagcagca  
agaaatgtgctaccagcaagaaatgttaacacatttgcgaggttgggcttttgttggcttgtttgctttgcagact  
tg

>CML322\_AY106734

-----

caaaccaagttggtgagctggtgaagtatggcagtagccgcgggatgggtgctttattggggctgggggcaaagatgaga  
agataccacagatgagatgacgctgcaggtgttcatcttttgtacaaagaccacaccagaggagcagcaagaaatgtgct  
accagcaagaaatgttaacacatttgcgaggttgggcttttgttggcttgtttgctttgcagactt-

>CML69\_AY106734

-----

tgcaaaccaagttggtgagctggtgaagtatggcagtagccgcgggatgggtgctttattggggctgggggcaaagatga  
gaagataccacagatgagatgacgctgcaggtgttcatcttttgtacaaagaccacaccagaggagcagcaagaaatgtg  
ctaccagcaagaaatgttaacacatttgcgaggttgggcttttgttggcttgtttgctttgcagactt-----

>Assinboine\_PI213793\_\_AY106734

-----

aagttggtgagctggtgaagtatggcagtagccgcgggatgggtgctttattggggctgggggcaaagatgagaagatac  
cacagatgagatgacgctgcaggtgttcatcttttgtacaaagaccacaccagaggagcagcaagaaatgtgctaccagc  
aagaaatgttaacacatttgcgaggttgggcttttgttggcttgtttgctttgcagacttg

>Gordo\_CHH 160\_\_AY106734

gattaccaatgcaaaccaagttggtgagctggtgaagtatggcagtagccgcgggatgggtgctttattggggctggggg  
caaagatgagaagataccacagatgagatgacgctgcaggtgttcatcttttgtacaaagaccacaccagaggagcagca  
agaaatgtgctaccagcaagaaatgttaacacatttgcgaggttgggcttttgttggcttgtttgctttgcagact  
tg

>Guirua\_MAG 450\_\_AY106734

-----

aagttggtgagctggtgaagtatggcagtagccgcgggatgggtgctttattggggctgggggcaaagatgagaagatac  
cacagatgagatgacgctgcaggtgttcatcttttgtacaaagaccacaccagaggagcagcaagaaatgtgctaccagc  
aagaaatgttaacacatttgcgaggttgggcttttgttggcttgtttgctttgcagacttg

>Nal-tel\_YUC 7\_\_AY106734

-----

ccgcgggatgggtgctttattggggctgggggcaaagatgagaagataccacagatgagatgacgctgcaggtgttcatc  
ttttgtacaaagaccacaccagaggagcagcaagaaatgtgctaccagcaagaaatgttaacacatttgcgaggttgg  
gcttttgttggcttgtttgctttgcagacttg

>Pisscotunto\_APC 13\_\_AY106734

-----

aagttggtgagctggtgaagtatggcagtagccgcgggatgggtgctttattggggctgggggcaaagatgagaagatac  
cacagatgagatgacgctgcaggtgttcatcttttgtacaaagaccacaccagaggagcagcaagaaatgtgctaccagc  
aagaaatgttaacacatttgcgaggttgggcttttgttggcttgtttgctttgcagacttg

>Sabanero\_SAN 329\_\_AY106734

-----

aagttggtgagctggtgaagtatggcagtagccgcgggatgggtgctttattggggctgggggcaaagatgagaagatac  
cacagatgagatgacgctgcaggtgttcatcttttgtacaaagaccacaccagaggagcagcaagaaatgtgctaccagc  
aagaaatgttaacacatttgcgaggttgggcttttgttggcttgtttgctttgcagacttg

>Serrano\_GUA 14\_\_AY106734

-----

ccgcgggatgggtgctttattggggctgggggcaaagatgagaagataccacagatgagatgacgctgcaggtgttcatc  
ttttgtacaaagaccacaccagaggagcagcaagaaatgtgctaccagcaagaaatgttaacacatttgcgaggttgg

gcttttggttgaggcttggctttgctttgcagacttg  
>Zapalote Chico\_OAX 70\_\_AY106734

-----  
ccgcgggatgggtgctttattggggctgggggcaaagatgagaagataccacagatgagatgacgctgcaggtgttcac  
ttttgtacaaagaccacaccagaggagcagcaagaaatttgctaccagcaagaaatttgtaacacatttgcgaggttg  
gcttttggttgaggcttggctttgctttgcagacttg  
>Bolita\_OAX 68\_\_AY106734

-----  
caagttggtgagctggtgaagtatggcagtagccgcgggatgggtgctttattggggctgggggcaaagatgagaagata  
ccacagatgagatgacgctgcaggtgttcacatctttgtacaaagaccacaccagaggagcagcaagaaatttgctaccag  
caagaaatttgtaacacatttgcgaggttgggctttgttggcttggctttgcagacttg  
>Cateto Sulino\_URG 11\_\_AY106734

-----  
ttggtgagctggtgaagtatggcagtagccgcgggatgggtgctttattggggctgggggcaaagatgagaagataccac  
agatgagatgacgctgcaggtgttcacatctttgtacaaagaccacaccagaggagcagcaagaaatttgctaccagcaag  
aaatttgtaacacatttgcgaggttgggctttgttggcttggctttgcagacttg  
>Chalqueno\_MEX 48\_\_AY106734

-----  
aagttggtgagctggtgaagtatggcagtagccgcgggatgggtgctttattggggctgggggcaaagatgagaagatac  
cacagatgagatgacgctgcaggtgttcacatctttgtacaaagaccacaccagaggagcagcaagaaatttgctaccagc  
aagaaatttgtaacacatttgcgaggttgggctttgttggcttggctttgcagacttg  
>Chapalote\_SIN 2\_\_AY106734

-----  
aagttggtgagctggtgaagtatggcagtagccgcgggatgggtgctttattggggctgggggcaaagatgagaagatac  
cacagatgagatgacgctgcaggtgttcacatctttgtacaaagaccacaccagaggagcagcaagaaatttgctaccagc  
aagaaatttgtaacacatttgcgaggttgggctttgttggcttggctttgcagacttg  
>Conico\_PUE 32\_\_AY106734

-----  
aagttggtgagctggtgaagtatggcagtagccgcgggatgggtgctttattggggctgggggcaaagatgagaagatac  
cacagatgagatgacgctgcaggtgttcacatctttgtacaaagaccacaccagaggagcagcaagaaatttgctaccagc  
aagaaatttgtaacacatttgcgaggttgggctttgttggcttggctttgcagacttg  
>Costeno\_VEN 453\_\_AY106734

gattaccaatgcaaaccaagttggtgagctggtgaagtatggcagtagccgcgggatgggtgctttattggggctggggg  
caaagatgagaagataccacagatgagatgacgctgcaggtgttcacatctttgtacaaagaccacaccagaggagcagca  
agaaatttgctaccagcaagaaatttgtaacacatttgcgaggttgggctttgttggcttggctttgcagact  
tg  
>Cristalino Norteno\_CHI 349\_\_AY106734

-----  
aagttggtgagctggtgaagtatggcagtagccgcgggatgggtgctttattggggctgggggcaaagatgagaagatac  
cacagatgagatgacgctgcaggtgttcacatctttgtacaaagaccacaccagaggagcagcaagaaatttgctaccagc  
aagaaatttgtaacacatttgcgaggttgggctttgttggcttggctttgcagacttg  
>Jalisco\_Benz 967\_\_AY106734

gattaccaatgcaaaccaagttggtgagctggtgaagtatggcagtagccgcgggatgggtgctttattggggctggggg  
caaagatgagaagataccacagatgagatgacgctgcaggtgttcacatctttgtacaaagaccacaccagaggagcagca  
agaaatttgctaccagcaagaaatttgtaacacatttgcgaggttgggctttgttggcttggctttgcagact  
tg

>Balsas\_Beadle & Kato Site 4\_\_AY106734  
gattaccaatgcaaaccaagttggtgagctggtgaagtatggcagtagccgcgggatgggtgctttattggggctggggg  
caaagatgagaagataccacagatgagatgacgctgcaggtgttcacatctttgtacaaagaccacaccagaggagcagca  
agaaatttgctaccagcaagaaatttgtaacacatttgcgaggttgggctttgttggcttggctttgcagact  
tg

>Balsas\_Kato Site 4\_\_AY106734  
gattaccaatgcaaaccaagttggtgagctggtgaagtatggcagtagccgcgggatgggtgctttattggggctggggg  
caaagatgagaagataccacagatgagatgacgctgcaggtgttcacatctttgtacaaagaccacaccagaggagcagca  
agaaatttgctaccagcaagaaatttgtaacacatttgcgaggttgggctttgttggcttggctttgcagact  
tg

>Balsas\_Wilkes Site 6\_\_AY106734

gattaccaatgcaaaccaagttggtgagctggtgaagtatggcagtagcccgcgggatgggtgctttattggggctggggg  
caaagatgagaagataccacagatgagatgacgctgcaggtgttcatctttgtacaaagaccacaccagaggagcagca  
agaaatttgctaccagcaagaaatttgtaacacatttgcgaggttgggctttgttggcttggcttgcagact  
tg

>Balsas\_INIFAP JSP y Lo5130\_AY106734

gattaccaatgcaaaccaagttggtgagctggtgaagtatggcagtagcccgcgggatgggtgctttattggggctggggg  
caaagatgagaagataccacagatgagatgacgctgcaggtgttcatctttgtacaaagaccacaccagaggagcagca  
agaaatttgctaccagcaagaaatttgtaacacatttgcgaggttgggctttgttggcttggcttgcagact  
tg

>Balsas\_INIFAP JSG y LOS 119\_AY106734

gattaccaatgcaaaccaagttggtgagctggtgaagtatggcagtagcccgcgggatgggtgctttattggggctggggg  
caaagatgagaagataccacagatgagatgacgctgcaggtgttcatctttgtacaaagaccacaccagaggagcagca  
agaaatttgctaccagcaagaaatttgtaacacatttgcgaggttgggctttgttggcttggcttgcagact  
tg

>Balsas\_CIMMYT 8783\_AY106734

gattaccaatgcaaaccaagttggtgagctggtgaagtatggcagtagcccgcgggatgggtgctttattggggctggggg  
caaagatgagaagataccacagatgagatgacgctgcaggtgttcatctttgtacaaagaccacaccagaggagcagca  
agaaatttgctaccagcaagaaatttgtaacacatttgcgaggttgggctttgttggcttggcttgcagact  
tg

>Oaxaca\_INIFAP JSG 197\_AY106734

gattaccaatgcaaaccaagttggtgagctggtgaagtatggcagtagcccgcgggatgggtgctttattggggctggggg  
caaagatgagaagataccacagatgagatgacgctgcaggtgttcatctttgtacaaagaccacaccagaggagcagca  
agaaatttgctaccagcaagaaatttgtaacacatttgcgaggttgggctttgttggcttggcttgcagact  
tg

>Balsas\_INIFAP JSG y LOS 109\_AY106734

gattaccaatgcaaaccaagttggtgagctggtgaagtatggcagtagcccgcgggatgggtgctttattggggctggggg  
caaagatgagaagataccacagatgagatgacgctgcaggtgttcatctttgtacaaagaccacaccagaggagcagca  
agaaatttgctaccagcaagaaatttgtaacacatttgcgaggttgggctttgttggcttggcttgcagact  
tg

>Balsas\_INIFAP JSG 378\_AY106734

gattaccaatgcaaaccaagttggtgagctggtgaagtatggcagtagcccgcgggatgggtgctttattggggctggggg  
caaagatgagaagataccacagatgagatgacgctgcaggtgttcatctttgtacaaagaccacaccagaggagcagca  
agaaatttgctaccagcaagaaatttgtaacacatttgcgaggttgggctttgttggcttggcttgcagact  
tg

>Balsas\_INIFAP JSG 374\_AY106734

gattaccaatgcaaaccaagttggtgagctggtgaagtatggcagtagcccgcgggatgggtgctttattggggctggggg  
caaagatgagaagataccacagatgagatgacgctgcaggtgttcatctttgtacaaagaccacaccagaggagcagca  
agaaatttgctaccagcaagaaatttgtaacacatttgcgaggttgggctttgttggcttggcttgcagact  
tg

>Balsas\_INIFAP JSG y LOS 161\_AY106734

gattaccaatgcaaaccaagttggtgagctggtgaagtatggcagtagcccgcgggatgggtgctttattggggctggggg  
caaagatgagaagataccacagatgagatgacgctgcaggtgttcatctttgtacaaagaccacaccagaggagcagca  
agaaatttgctaccagcaagaaatttgtaacacatttgcgaggttgggctttgttggcttggcttgcagact  
tg

>Balsas\_CIMMYT 11355\_AY106734

gattaccaatgcaaaccaagttggtgagctggtgaagtatggcagtagcccgcgggatgggtgctttattggggctggggg  
caaagatgagaagataccacagatgagatgacgctgcaggtgttcatctttgtacaaagaccacaccagaggagcagca  
agaaatttgctaccagcaagaaatttgtaacacatttgcgaggttgggctttgttggcttggcttgcagact  
tg

>Balsas\_USDA PI566686\_AY106734

gattaccaatgcaaaccaagttggtgagctggtgaagtatggcagtagcccgcgggatgggtgctttattggggctggggg  
caaagatgagaagataccacagatgagatgacgctgcaggtgttcatctttgtacaaagaccgaccagaggagcagca  
agaaatttgctaccagcaagaaatttgtaacacatttgcgaggttgggctttgttggcttggcttgcagact  
tg

>Jalisco\_INIFAP JSG y MAS 264\_AY106734

gattaccaatgcaaaccaagttggtgagctggtgaagtatggcagtagcccgcgggatgggtgctttattggggctggggg  
caaagatgagaagataccacagatgagatgacgctgcaggtgttcatctttgtacaaagaccacaccagaggagcagca

agaaatTTGCTaccagcaagaaatTTGTTaacacatTTGCGagggtGGGctTTTgTtGtGGctTgTtGctTTgcagact  
tg

>B73\_AY107952

tTgTtTtGtCtTattGagacatCcttCtaatGacattaatCttGcaggatGcttTctcagaaacaagaacatagTaaat  
ccatCttctacaggagccatactTtGtggaccgaatGaaatGcaggaggTgtGcattGtTgtTgtTtcaagactCtTtTt  
gcataactTtactattaagcatGctGagcctatGacaaaaatTgTtTgctactTgtGagtCgaactGctactGcatCaaa  
ctGtGcatGtaaacactTtaagtacta-----  
tataTtTaaaatGgagacctacatCcttaaactTactaactGtagcatCctagatCaaaattagTctaagatGagatCtggc  
tcatcatCtatttagcatGctgaatCctaaaacctTtctacctctggctctcatGcactCcttctctGacctGcatCaa  
ctaaccgcaccaccagctTtTtTtC-----  
gtGtggatGcaatGatgaattGatgatactGatGacgctCtctactTtTtacaggaactCaccttatCcttGtagcagatG  
gtGtctcagGagacaaaatCtTaaacgaactactGaaa

>Oh43\_AY107952

-

tGtTtTtGtCtTattGagacatCcttCtaatGacattaatCttGcaggatGcttTctcagaaacaagaacatagTaaatC  
catCttctacaggagccatactTtGtggaccgaatGaaatGcaggaggTgtGcattGtTgtTgtTtcaagactCtTtTtG  
cataactTtactattaagcatGctGagcctatGacaaaaatTgTtTgctactTgtGagtCgaactGctactGcatCaaac  
tGtGcatGtaaacactTtaagtacta-----  
tataTtTaaaatGgagacctacatCcttaaactTactaactGtagcatCctagatCaaaattagTctaagatGagatCtggc  
tcatcatCtatttagcatGctgaatCctaaaacctTtctacctctggctctcatGcactCcttctctGacctGcatCaa  
ctaaccgcaccaccagctTtTtTtC-----  
gtGtggatGcaatGatgaattGatgatactGatGacgctCtctactTtTtacaggaactCaccttatCcttGtagcagatG  
gtGtctcagGagacaaaatCtTaaacgaactactGaaa

>IL14H\_AY107952

tTgTtTtGtCtTattGagacatCcttCtaatGacattaatCttGcaggatGcttTctcagaaacaagaacatagTaaat  
ccatCttctacaggagccatactTtGtggaccgaatGaaatGcaggaggTgtGcattGtTgtTgtTtcaagactCtTtTt  
gcataactTtactattaagcatGctGagcctatGacaaaaatTgTtTgctactTgtGagtCgaactGctactGcatCaaa  
ctGtGcatGtaaacactTtaagtacta-----  
tataTtTaaaatGgagacctacatCcttaaactTactaactGtagcatCctagatCaaaattagTctaagatGagatCtggc  
tcatcatCtatttagcatGctgaatCctaaaacctTtctacctctggctctcatGcactCcttctctGacctGcatCaa  
ctaaccgcaccaccagctTtTtTtC-----  
gtGtggatGcaatGatgaattGatgatactGatGacgctCtctactTtTtacaggaactCaccttatCcttGtagcagatG  
gtGtctcagGagacaaaatCtTaaacgaactactGaaa

>Mo17\_AY107952

tTgTtTtGtCtTattGagacatCcttCtaatGacattaatCttGcaggatGcttTctcagaaacaagaacatagTaaat  
ccatCttctacaggagccatactTtGtggaccgaatGaaatGcaggaggTgtGcattGtTgtTgtTtcaagactCtTtTt  
gcataactTtactattaagcatGctGagcctatGacaaaaatTgTtTgctactTgtGagtCgaactGctactGcatCaaa  
ctGtGcatGtaaacactTtaagtacta-----  
tataTtTaaaatGgagacctacatCcttaaactTactaactGtagcatCctagatCaaaattagTctaagatGagatCtggc  
tcatcatCtatttagcatGctgaatCctaaaacctTtctacctctggctctcatGcactCcttctctGacctGcatCaa  
ctaaccgcaccaccagctTtTtTtC-----  
gtGtggatGcaatGatgaattGatgatactGatGacgctCtctactTtTtacaggaactCaccttatCcttGtagcagatG  
gtGtctcagGagacaaaatCtTaaacgaactactGaaa

>Ky21\_AY107952

-----

tTtGtCtTattGagacatCcttCtaatGacattaatCttGcaggatGcttTctcagaaacaagaacatagTaaatCcat  
CttctacaggagccatactTtGtggaccgaatGaaatGcaggaggTgtGcattGtTgtTgtTtcaagactCtTtTtGcat  
aaCttTactattaagcatGctGagcctatGacaaaaatTgTtTgctactTgtGagtCgaactGctactGcatCaaactGt  
GcatGtaaacactTtaagtacta-----  
tataTtTaaaatGgagacctacatCcttaaactTactaactGtagcatCctagatCaaaattagTctaagatGagatCtggc  
tcatcatCtatttagcatGctgaatCctaaaacctTtctacctctggctctcatGcactCcttctctGacctGcatCaa  
ctaaccgcaccaccagctTtTtTtC-----  
gtGtggatGcaatGatgaattGatgatactGatGacgctCtctactTtTtacaggaactCaccttatCcttGtagcagatG  
gtGtctcagGagacaaaatCtTaaacgaactactGaaa

>M37W\_AY107952

ttgttttgccttattgagacatccttctaataatccttgcaggatgctttcttcagaaacaagaacatagtaaat  
ccatcttctacaggagccatactttgtggaccgaatgaaatgcaggaggtgtgcatgtgtgtgtttcaagactctttt  
gcataactttactattaagcatgctgagcctatgacaaaaatgtttgctacttgtgagtcgaactgctactgcatcaa  
ctgtgcatgtaaacacttaagtacta-----  
tatatttaaaatggagacctacatccctaaacttactaactgtagcatcctagatcaaaattagtctaagatctggc  
tcatcatctatttagcatgctgaatcctaaaacctttctacctctggctctcatgcactcccttctctgacctgcatcaa  
ctaaccgcaccaccagcttttttc-----  
gtgtggatgcaatgatgaattgatgatactgatgacgctctctactttacaggaactcaccttatcccttgtagcagatg  
gtgtctcacgagacaaaatcctaacgaactactgaaa

>HP301\_AY107952

-----

tttgtcttattgagacatccttctaataatccttgcaggatgctttcttcagaaacaagaacatagtaaatccat  
cttctacaggagccatactttgtggaccgaatgaaatgcaggaggtgtgcatgtgtgtgtttcaagactcttttgc  
aactttactattaagcatgctgagcctatgacaaaaatgtttgctacttgtgagtcgaactgctactgcatcaaactgt  
gcatgtaaacacttaagtacta-----  
tatatttaaaatggagacctacatccctaaacttactaactgtagcatcctagatcaaaattagtctaagatctggc  
tcatcatctatttagcatgctgaatcctaaaacctttctacctctggctctcatgcactcccttctctgacctgcatcaa  
ctaaccgcaccaccagcttttttc-----  
gtgtggatgcaatgatgaattgatgatactgatgacgctctctactttacaggaactcaccttatcccttgtagcagatg  
gtgtctcacgagacaaaatcctaacgaactactgaaa

>CML247\_AY107952

-----

tttgtcttattgagacatccttctaataatccttgcaggatgctttcttcagaaacaagaacatagtaaatccat  
cttctacaggagccatactttgtggaccgaatgaaatgcaggaggtgtgcatgtgtgtgtttcaagactcttttgc  
aactttactattaagcatgctgagcctatgacaaaaatgtttgctacttgtgagtcgaactgctactgcatcaaactgt  
gcatgtaaacacttaagtacta-----  
tatatttaaaatggagacctacatccctaaacttactaactgtagcatcctagatcaaaattagtctaagatctggc  
tcatcatctatttagcatgctgaatcctaaaacctttctacctctggctctcatgcactcccttctctgacctgcatcaa  
ctaaccgcaccaccagcttttttc-----  
gtgtggatgcaatgatgaattgatgatactgatgacgctctctactttacaggaactcaccttatcccttgtagcagatg  
gtgtctcacgagacaaaatcctaacgaactactgaaa

>NC350\_AY107952

-----

taatccttgcaggatgctttcttcagaaacaagaacatagtaaatccatcttctacaggagccatactttgtggaccgaat  
gaaatgcaggaggtgtgcatgtgtgtgtttcaagactcttttgcataactttactattaagcatgctgagcctatgac  
aaaaatgtttgctacttgtgagtcgaactgctactgcatcaaactgtgcatgtaaacacttaagtacta-----  
tatatttaaaatggagacctacatccctaaacttactaactgtagcatcctagatcaaaattagtctaagatctggc  
tcatcatctatttagcatgctgaatcctaaaacctttctacctctggctctcatgcactcccttctctgacctgcatcaa  
ctaaccgcaccaccagcttttttc-----  
gtgtggatgcaatgatgaattgatgatactgatgacgctctctactttacaggaactcaccttatcccttgtagcagatg  
gtgtctcacgagacaaaatcctaacgaactactgaaa

>Ki3\_AY107952

-----

tttgtcttattgagacatccttctaataatccttgcaggatgctttcttcagaaacaagaacatagtaaatccat  
cttctacaggagccatactttgtggaccgaatgaaatgcaggaggtgtgcatgtgtgtgtttcaagactcttttgc  
aactttactattaagcatgctgagcctatgacaaaaatgtttgctacttgtgagtcgaactgctactgcatcaaactgt  
gcatgtaaacacttaagtacta-----  
tatatttaaaatggagacctacatccctaaacttactaactgtagcatcctagatcaaaattagtctaagatctggc  
tcatcatctatttagcatgctgaatcctaaaacctttctacctctggctctcatgcactcccttctctgacctgcatcaa  
ctaaccgcaccaccagcttttttc-----  
gtgtggatgcaatgatgaattgatgatactgatgacgctctctactttacaggaactcaccttatcccttgtagcagatg  
gtgtctcacgagacaaaatcctaacgaactactgaaa

>Ki11\_AY107952

-----

tttgtcttattgagacatccttctaataatccttgcaggatgctttcttcagaaacaagaacatagtaaatccat  
cttctacaggagccatactttgtggaccgaatgaaatgcaggaggtgtgcatgtgtgtgtttcaagactcttttgc

aactttactattaagcatgctgagcctatgacaaaaattgtttgctacttgtgagtcgaactgctactgcatcaaactgt  
gcatgtaaacacttaagtacta-----  
tatatttaaaatggagacctacatccctaaacttactaactgtagcatcctagatcaaaattagtctaagatctggc  
tcatcatctattagcatgctgaatcctaaaacctttctacctctggctctcatgcactcccttctctgacctgcatcaa  
ctaaccgcaccaccagcttttttc-----  
gtgtggatgcaatgatgaattgatgatactgatgacgctctctactttacaggaactcaccttatcccttgtagcagatg  
gtgtctcacgagacaaaatcttaacgaactactgaaa  
>CML322\_AY107952

--

gttttgtcttattgagacatccttctaataatccttgcaggatgctttcttcagaaacaagaacatagtaaatcc  
atcttctacaggagccatactttgtggaccgaatgaaatgcaggaggtgtgcatgtgtgtgtttcaagactctttttgc  
ataactttactattaagcatgctgagcctatgacaaaaattgtttgctacttgtgagtcgaactgctactgcatcaaact  
gtgcatgtaaacacttaagtacta-----  
tatatttaaaatggagacctacatccctaaacttactaactgtagcatcctagatcaaaattagtctaagatctggc  
tcatcatctattagcatgctgaatcctaaaacctttctacctctggctctcatgcactcccttctctgacctgcatcaa  
ctaaccgcaccaccagcttttttc-----  
gtgtggatgcaatgatgaattgatgatactgatgacgctctctactttacaggaactcaccttatcccttgtagcagatg  
gtgtctcacgagacaaaatcttaacgaactactgaaa  
>CML69\_AY107952

ttgttttgtcttattgagacatccttctaataatccttgcaggatgctttcttcagaaacaagaacatagtaaat  
ccatcttctacaggagccatactttgtggaccgaatgaaatgcaggaggtgtgcatgtgtgtgtttcaagactcttttt  
gcataactttactattaagcatgctgagcctatgacaaaaattgtttgctacttgtgagtcgaactgctactgcatcaaa  
ctgtgcatgtaaacacttaagtacta-----  
tatatttaaaatggagacctacatccctaaacttactaactgtagcatcctagatcaaaattagtctaagatctggc  
tcatcatctattagcatgctgaatcctaaaacctttctacctctggctctcatgcactcccttctctgacctgcatcaa  
ctaaccgcaccaccagcttttttc-----  
gtgtggatgcaatgatgaattgatgatactgatgacgctctctactttacaggaactcaccttatcccttgtagcagatg  
gtgtctcacgagacaaaatcttaacgaactactgaaa  
>Assinboine\_PI213793\_AY107952

ttgttttgtcttattgagacatccttctaataatccttgcaggatgctttcttcagaaacaagaacatagtaaat  
ccatcttctacaggagccatactttgtggaccgaatgaaatgcaggaggtgtgcatgtgtgtgtttcaagactcttttt  
gcataactttactattaagcatgctgagcctatgacaaaaattgtttgctacttgtgagtcgaactgctactgcatcaaa  
ctgtgcatgtaaacacttaagtacta-----  
tatatttaaaatggagacctacatccctaaacttactaactgtagcatcctagatcaaaattagtctaagatctggc  
tcatcatctattagcatgctgaatcctaaaacctttctacctctggctctcatgcactcccttctctgacctgcatcaa  
ctaaccgcaccaccagcttttttc-----  
gtgtggatgcaatgatgaattgatgatactgatgacgctctctacttt-----  
-----

>Gordo\_CHH 160\_AY107952

ttgttttgtcttattgagacatccttctaataatccttgcaggatgctttcttcagaaacaagaacatagtaaat  
ccatcttctacaggagccatactttgtggaccgaatgaaatgcaggaggtgtgcatgtgtgtgtttcaagactcttttt  
gcataactttactattaagcatgctgagcctatgacaaaaattgtttgctacttgtgagtcgaactgctactgcatcaaa  
ctgtgcatgtaaacacttaagtacta-----  
tatatttaaaatggagacctacatccctaaacttactaactgtagcatcctagatcaaaattagtctaagatctggc  
tcatcatctattagcatgctgaatcctaaaacctttctacctctggctcttatgcactcccttctctgacctgcatcaa  
ctaaccgcaccaccagcttttttc-----  
gtgtggatgcaatgatgaattgatgatactgatgacgctctctactttacaggaactcaccttatcccttgt-----  
-----

>Guirua\_MAG 450\_AY107952

---

ttttgtcttattgagacatccttctaataatccttgcaggatgctttcttcagaaacaagaacatagtaaatcca  
tcttctacaggagccatactttgtggaccgaatgaaatgcaggaggtgtgcatgtgtgtgtttcaagactctttttgca  
taactttactattaagcatgctgagcctatgacaaaaattgtttgctacttgtgagtcgaactgctactgcatcaaactg  
tgcattgtaaacacttaagtacta-----  
tatatttaaaatggagacctacatccctaaacttactaactgtagcatcctagatcaaaattagtctaagatctggc  
tcatcatctattagcatgctgaatcctaaaacctttctacctctggctctcatgcactcccttctctgacctgcatcaa  
ctaaccgcaccaccagcttttttc-----

gtgtggatgcaatgatgaattgatgatactgatgacgctctctactttacaggaactcaccttatcccttgt-----  
-----

>Pisscotunto\_APC 13\_AY107952

ttgttttgccttattgagacatccttctaataatccttgcaggatgctttcttcagaaacaagaacatagtaaat  
ccatcttctacaggagccatactttgtggaccgaatgaaatgcaggaggtgtgcattggttgtttcaagactctttt  
gcataactttactattaagcatgctgagcctatgacaaaaattgtttgctacttgtgagtcgaactgctactgcatcaa  
ctgtgcatgtaaacacttaagtacta-----  
tataatataaaatggagacctacatccctaaacttactaactgtagcatcctagatcaaaattagtctaatagagatctggc  
tcatcatctatcttagcatgctgaatcctaaaacctttctacctctggctcttatgcactcccttctctgacctgcatcaa  
ctaaccgcaccaccagcttttttc-----  
gtgtggatgcaatgatgaattgatgatactgatgacgctctctacttt-----  
-----

>Serrano\_GUA 14\_AY107952

ttgttttgccttattgagacatccttctaataatccttgcaggatgctttcttcagaaacaagaacatagtaaat  
ccatcttctacaggagccatactttgtggaccgaatgaaatgcaggaggtgtgcattggttgtttcaagactctttt  
gcataactttactattaagcatgctgagcctatgacaaaaattgtttgctacttgtgagtcgaactgctactgcatcaa  
ctgtgcatgtaaacacttaagtacta-----  
tataatataaaatggagacctacatccctaaacttactaactgtagcatcctagatcaaaattagtctaatagagatctggc  
tcatcatctatcttagcatgctgaatcctaaaacctttctacctctggctctcatgcactcccttctctgacctgcatcaa  
ctaaccgcaccaccagcttttttc-----  
gtgtggatgcaatgatgaattgatgatactgatgacgctctctacttt-----  
-----

>Bolita\_OAX 68\_AY107952

ttgttttgccttattgagacatccttctaataatccttgcaggatgctttcttcagaaacaagaacatagtaaat  
ccatcttctacaggagccatactttgtggaccgaatgaaatgcaggaggtgtgcattggttgtttcaagactctttt  
gcataactttactattaagcatgctgagcctatgacaaaaattgtttgctacttgtgagtcgaactgctactgcatcaa  
ctgtgcatgtaaacacttaagtacta-----  
tataatataaaatggagacctacatccctaaacttactaactgtagcatcctagatcaaaattagtctaatagagatctggc  
tcatcatctatcttagcatgctgaatcctaaaacctttctacctctggctctcatgcactcccttctctgacctgcatcaa  
ctaaccgcaccaccagcttttttc-----  
gtgtggatgcaatgatgaattgatgatactgatgacgctctctacttt-----  
-----

>Cateto Sulino\_URG 11\_AY107952

ttgttttgccttattgagacatccttctaataatccttgcaggatgctttcttcagaaacaagaacatagtaaat  
ccatcttctacaggagccatactttgtggaccgaatgaaatgcaggaggtgtgcattggttgtttcaagactctttt  
gcataactttactattaagcatgctgagcctatgacaaaaattgtttgctacttgtgagtcgaactgctactgcatcaa  
ctgtgcatgtaaacacttaagtacta-----  
tataatataaaatggagacctacatccctaaacttactaactgtagcatcctagatcaaaattagtctaatagagatctggc  
tcatcatctatcttagcatgctgaatcctaaaacctttctacctctggctctcatgcactcccttctctgacctgcatcaa  
ctaaccgcaccaccagcttttttc-----  
gtgtggatgcaatgatgaattgatgatactgatgacgctctctactttacaggaactc-----  
-----

>Chalqueno\_MEX 48\_AY107952

ttgttttgccttattgagacatccttctaataatccttgcaggatgctttcttcagaaacaagaacatagtaaat  
ccatcttctacaggagccatactttgtggaccgaatgaaatgcaggaggtgtgcattggttgtttcaagactctttt  
gcataactttactattaagcatgctgagcctatgacaaaaattgtttgctacttgtgagtcgaactgctactgcatcaa  
ctgtgcatgtaaacacttaagtacta-----  
tataatataaaatggagacctacatccctaaacttactaactgtagcatcctagatcaaaattagtctaatagagatctggc  
tcatcatctatcttagcatgctgaatcctaaaacctttctacctctggctctcatgcactcccttctctgacctgcatcaa  
ctaaccgcaccaccagcttttttc-----  
gtgtggatgcaatgatgaattgatgatactgatgacgctctctacttt-----  
-----

>Chapalote\_SIN 2\_AY107952

---  
ttttgtcttattgagacatccttctaataatccttgcaggatgctttcttcagaaacaagaacatagtaaatcca  
tcttctacaggagccatactttgtggaccgaatgaaatgcaggaggtgtgcattggttgtttcaagactcttttgc  
taactttactattaagcatgctgagcctatgacaaaaattgtttgctacttgtgagtcgaactgctactgcatcaaactg

tgcatgtaaacttaagtacta-----  
tatattttaaagtggagacctacatccctaaacttactaactgtagcatcctagatcaaaattagtctaagatctggc  
tcatcatctatttagcatgctgaatcctaaaacctttctacctctggctctcatgcactcccttctctgacctgcatcaa  
ctaaccgcaccaccagcttttttc-----  
gtgtggatgcaatgatgaattgatgatactgatgacgctctctacttt-----  
-----

>Costeno\_VEN 453\_AY107952

ttgttttgtcttattgagacatccttctaataatcctgacgagatgctttcttcagaaacaagaacatagtaaat  
ccatcttctacaggagccatactttgtggaccgaatgaaatgcaggaggtgtgcattggttgttgtttcaagactctttt  
gcataactttactattaagcatgctgagcctatgacaaaaattggttgctacttgtgagtcgaactgctactgcatcaa  
ctgtgcatgtaaacttaagtacta-----  
tatattttaaagtggagacctacatccctaaacttactaactgtagcatcctagatcaaaattagtctaagatctggc  
tcatcatctatttagcatgctgaatcctaaaacctttctacctctggctctcatgcactcccttctctgacctgcatcaa  
ctaaccgcaccaccagcttttttc-----  
gtgtggatgcaatgatgaattgatgatactgatgacgctctctacttt-----  
-----

>Cristalino Norteno\_CHI 349\_AY107952

-----  
ccttctaataatgacattaatcctgacgagatgctttcttcagaaacaagaacatagtaaatccatcttctacaggagccatac  
ttgtggaccgaatgaaatgcaggaggtgtgcattggttgttgtttcaagactcttttgcataactttactattaagcat  
gctgagcctatgacaaaaattggttgctacttgtgagtcgaactgctactgcatcaaactgtgcatgtaaacttaagt  
acta-----  
tatattttaaagtggagacctacatccctaaacttactaactgtagcatcctagatcaaaattagtctaagatctggc  
tcatcatctatttagcatgctgaatcctaaaacctttctacctctggctctcatgcactcccttctctgacctgcatcaa  
ctaaccgcaccaccagcttttttc-----  
gtgtggatgcaatgatgaattgatgatactgatgacgctctctacttt-----  
-----

>Dzit Bacal\_GUA 131\_AY107952

-----  
acatccttctaataatgacattaatcctgacgagatgctttcttcagaaacaagaacatagtaaatccatcttctacaggagcc  
atactttgtggaccgaatgaaatgcaggaggtgtgcattggttgttgtttcaagactcttttgcataactttactatta  
gcatgctgagcctatgacaaaaattggttgctacttgtgagtcgaactgctactgcatcaaactgtgcatgtaaactt  
aagtacta-----  
tatattttaaagtggagacctacatccctaaacttactaactgtagcatcctagatcaaaattagtctaagatctggc  
tcatcatctatttagcatgctgaatcctaaaacctttctacctctggctctcatgcactcccttctctgacctgcatcaa  
ctaaccgcaccaccagcttttttc-----  
gtgtggatgcaatgatgaattgatgatactgatgacgctctctactttacaggaactcacctt-----  
-----

>Balsas\_Beadle & Kato Site 4\_AY107952

-----  
cttctaataatgacattaatcctgacgagatgctttcttcagaaacaagaacatagtaaatccatcttctacaggagccatac  
ttgtggaccgaatgaaatgcaggaggtgtgcattggttgttgtttcaagactcttttgcataactttactattaagcatg  
ctgagcctatgacaaaaattggttgctacttgtgagtcgaactgctactgcatcaaactgtgcatgtaaactt  
aagta  
cta-----  
tatattttaaagtggagacctacatccctaaacttactaactgtagcatcctagatcaaaattagtctaagatctggc  
tcatcatctatttagcatgctgaatcctaaaacctttctacctctggctctcatgcactcccttctctgacctgcatcaa  
ctaaccgcaccaccagcttttttc-----  
gtgtggatgcaatgatgaattgatgatactgatgacgctctctactttacaggaactcaccttatcccttgtagcagatg  
gtgtctcagagacaaaaacttaacgaactactgaaa  
>Balsas\_Wilkes Site 6\_AY107952

-----  
cttctaataatgacattaatcctgacgagatgctttcttcagaaacaagaacatagtaaatccatcttctacaggagccatac  
ttgtggaccgaatgaaatgcaggaggtgtgcattggttgttgtttcaagactcttttgcataactttactattaagcatg  
ctgagcctatgacaaaaattggttgctacttgtgagtcgaactgctactgcatcaaactgtgcatgtaaactt  
aagta  
cta-----  
tatattttaaagtggagacctacatccctaaacttactaactgtagcatcctagatcaaaattagtctaagatctggc  
tcatcatctatttagcatgctgaatcctaaaacctttctacctctggctctcatgcactcccttctctgacctgcatcaa



ctaaccgcaccaccagcttttttc-----  
gtgtggatgcaatgatgaattgatgatactgatgacgctctctactttacaggaactcaccttatcccttgtagcagatg  
gtgtctcagcagacaaaatcttaacgaactactgaaa  
>Balsas\_INIFAP JSP y Lo5130\_AY107952

-----  
tccttctaatacattaatccttgaggatgctttcttcagaaacaagaacatagtaaaccatcttctacaggagccata  
ctttgtggaccgaatgaaatgcaggaggtgtgcattggtgtgtttcaagactcttttgcataaactttactattaagca  
tgctgagcctatgacaaaaattggttgctacttgtgagtcgaactgctactgcatcaaactgtgcatgtaaacttaag  
tacta-----

tatatttaaaatggagacctacatccctaaacttactaactgtagcatcctagatcaaaattagtctaagatctggc  
tcatcatctatcttagcatgctgaatcctaaaacctttctacctctggctctcatgcactcccttctctgacctgcatcaa  
ctaaccgcaccaccagcttttttc-----  
gtgtggatgcaatgatgaattgatgatactgatgacgctctctactttacaggaactcaccttatcccttgtagcagatg  
gtgtctcagcagacaaaatcttaacgaactactgaaa  
>Balsas\_INIFAP JSG y LOS 119\_AY107952

-----  
tccttctaatacattaatccttgaggatgctttcttcagaaacaagaacatagtaaaccatcttctacaggagccata  
ctttgtggaccgaatgaaatgcaggaggtgtgcattggtgtgtttcaagactcttttgcataaactttactattaagca  
tgctgagcctatgacaaaaattggttgctacttgtgagtcgaactgctactgcatcaaactgtgcatgtaaacttaag  
tacta-----

tatatttaaaatggagacctacatccctaaacttactaactgtagcatcctagatcaaaattagtctaagatctggc  
tcatcatctatcttagcatgctgaatcctaaaacctttctacctctggctctcatgcactcccttctctgacctgcatcaa  
ctaaccgcaccaccagcttttttc-----  
gtgtggatgcaatgatgaattgatgatactgatgacgctctctactttacaggaactcaccttatcccttgtagcagatg  
gtgtctcagcagacaaaatcttaacgaactactgaaa  
>Jalisco\_INIFAP JSG y MAS 401\_AY107952

ttgttttgtcttattgagacatccttctaatacattaatccttgaggatgctttcttcagaaacaagaacatagtaaacc  
ccatcttctacaggagccatactttgtggaccgaatgaaatgcaggaggtgtgcattggtgtgtttcaagactctttt  
gcataaactttactattaagcatggtgagcctatgacaaaaattggttgctacttgtgagtcgaactgctactgcatcaa  
ctgtgcatgtaaacttaagtacta-----  
tataatttaaaatggagacctacatccctataacttgctaactgtagcatcctagatcaaaattagtctaacgagatctggc  
tcatcatctatcttagcatgctgaatcctaaaacctttctacctctggctctcatgcactcccttctctgaccgcatcaa  
ctaaccgcaccaccagcttttttc-----

gtgtggatgcaatgatgaattgatgatactgatgacgctctctactttacaggaactcaccttatcccttgtagcagatg  
gtgtttcagcagacaaaatcttaacgaactactgaaa  
>Balsas\_CIMMYT 8783\_AY107952

---  
ttttgtcttattgagacatccttctaatacattaatccttgaggatgctttcttcagaaacaagaacatagtaaacc  
tcttctacaggagccatactttgtggaccgaatgaaatgcaggaggtgtgcattggtgtgtttcaagactcttttgc  
taactttactattaagcatgctgagcctatggaaaaaattggttgctacttgtgagtcgaactgctactgcatcaaactg  
tgcattgtaaacttaagtacta-----  
tataatttaaaatggagacctacatccctaaacttgctaactgtagcatcctagatcaaaattagtctaagatctggc  
tcatcatctatcttagcatgctgaatcctaaaacctttctacctctggctctcatgcactcccttctctgacctgcatcaa  
ctaaccgcaccaccagcttttttc-----

gtgtggatgcaatgatgaattgatgatactgatgacgctctctactttacaggaactcaccttatcccttgtagcagatg  
gtgtctcagcagacaaaatcttaacgaactactgaaa  
>Oaxaca\_INIFAP JSG 197\_AY107952

---  
ttttgtcttattgagacatccttctaatacattaatccttgaggatgctttcttcagaaacaagaacatagtaaacc  
tcttctacaggagccatactttgtggaccgaatgaaatgcaggaggtgtgcattggtgtgtttcaagactcttttgc  
taactttactattaagcatgctgagcctatgacaaaaaattggttgctacttgtgagtcgaactgctactgcatcaaactg  
tgcattgtaaacttaagtacta-----  
tataatttaaaatggagacctacatccctaaacttactaactgtagcatcctagatcaaaattagtctaagatctggc  
tcatcatctatcttagcatgctgaatcctaaaacctttctacctctggctcttatgcactcccttctctgacctgcatcaa  
ctaaccgcaccaccagcttttttc-----

gtgtggatgcaatgatgaattgatgatactgatgacgctctctactttacaggaactcaccttatcccttgtagcagatg  
gtgtctcagcagacaaaatcttaacgaactactgaaa

>Balsas\_INIFAP JSG y LOS 109\_AY107952

ttgttttgccttattgagacatccttctaataatccttgcaggatgctttcttcagaaacaagaacatagtaa  
ccatcttctacaggagccatactttgtggaccgaatgaaatgcaggaggtgtgcattggtggtgttcaagactctttt  
gcataactttactattaagcatgctgagcctatgacaaaaattgtttgctacttgtgagtcgaactgctactgcatcaa  
ctgtgcatgtaaacacttaagtacta-----  
tatatttaaaatggagacctacatccctaaacttactaactgtagcatcctagatcaaaattagtctaagatctggc  
tcatcatctatttagcatgctgaatcctaaaacctttctacctctggctctcatgcactcccttctctgacctgcatcaa  
ctaaccgcaccaccagcttttttc-----  
gtgtggatgcaatgatgaattgatgatactgatgacgctctctactttacaggaactcaccttatcccttgtagcagatg  
gtgtctcacgagacaaaaatcttaacgaactactgaaa

>Balsas\_INIFAP JSG 378\_AY107952

-----  
tccttctaataatccttgcaggatgctttcttcagaaacaagaacatagtaaattccatcttctacaggagccata  
ctttgtggaccgaatgaaatgcaggaggtgtgcattggtggtgttcaagactcttttgcctaactttactattaagca  
tgctgagcctatgacaaaaattgtttgctacttgtgagtcgaactgctactgcatcaaacgtgcatgtaaacacttaag  
tacta-----tatatttaaaatggagacctacatccctaaact---  
taactgtagcatcctagatcaaaattagtctaagatctggctcatcatctatttagcatgctgaatcctaaaacctt  
tctacctctggctctcatgcactcccttctctgacctgcatcaactaaccgcaccaccagcttttttc-----  
gtgtggatgcaatgatgaattgatgatactgatgacgctctctactttacaggaactcaccttatcccttgtagcagatg  
gtgtctcacgagacaaaaatcttaacgaactactgaaa

>Balsas\_INIFAP JSG 374\_AY107952

-  
tgttttgtcttattgagacatccttctaataatccttgcaggatgctttcttcagaaacaagaacatagtaaattc  
catcttctacaggagccatactttgtggaccgaatgaaatgcaggaggtgtgcattggtggtgttcaagactcttttg  
cataactttactattaagcatgctgagcctatgacaaaaattgtttgctacttgtgagtcgaactgctactgcatcaaac  
tgtgcatgtaaacacttaagtacta-----  
tatatttaaaatggagacctacatccctaaacttactaactgtagcatcctagatcaaaattagtctaagatctggc  
tcatcatctatttagcatgctgaatcctaaaacctttctacctctggctctcatgcactcccttctctgacctgcatcaa  
ctaaccgcaccaccagcttttttc-----  
gtgtggatgcaatgatgaattgatgatactgatgacgctctctactttacaggaactcaccttatcccttgtagcagatg  
gtgtctcacgagacaaaaatcttaacgaactactgaaa

>Balsas\_INIFAP JSG y LOS 161\_AY107952

-  
tgttttgtcttattgagacatccttctaataatccttgcaggatgctttcttcagaaacaagaacatagtaaattc  
catcttctacaggagccatactttgtggaccgaatgaaatgcaggaggtgtgcattggtggtgttcaagactcttttg  
cataactttactattaagcatgctgagcctatgacaaaaattgtttgctacttgtgagtcgaactgctactgcatcaaac  
tgtgcatgtaaacacttaagtacta-----  
tatatttaaaatggagacctacatccctaaacttactaactgtagcatcctagatcaaaattagtctaagatctggc  
tcatcatctatttagcatgctgaatcctaaaacctttctacctctggctctcatgcactcccttctctgacctgcatcaa  
ctaaccgcaccaccagcttttttc-----  
gtgtggatgcaatgatgaactgatgatactgatgacgctctctactttacaggaactcaccttatcccttgtagcagatg  
gtgtctcacgagacaaaaatcttaacgaactactgaaa

>Balsas\_USDA PI566686\_AY107952

---  
ttttgtcttattgagacatccttctaataatccttgcaggatgctttcttcagaaacaagaacatagtaaattcca  
tcttctacaggagccatactttgtggaccgaatgaaatgcaggaggtgtgcattggtggtgttcaagactcttttgca  
taactttactattaagcatgctgagcctatgacaaaaattgtttgctacttgtgagtcgaactgctactgcatcaaac  
tgcatgtaaacacttaagtacta-----  
tatatttaaaatggagacctacatccctaaacttactaactgtagcatcctagatcaaaattagtctaagatctggc  
tcatcatctatttagcatgctgaatcctaaaacctttctacctctggctctcatgcactcccttctctgacctgcatcaa  
ctaaccgcaccaccagcttttttc-----  
gtgtggatgcaatgatgaattgatgatactgatgacgctctctactttacaggaactcaccttatcccttgtagcagatg  
gtgtctcacgagacaaaaatcttaacgaactactgaaa

>Tripsacum\_WW-2120\_AY107952

-----  
gagacatccttttactgacattaatccttgcaggatgctttcttgaaaaacaagaacatagtaaattccatcttctacagga  
gccatactttgtggaccgaatgaaatgcaggaggtgtgcattggtggtgttcaagattctttt-

gcataactttactattaagcatgttgagactatgagaaaaattggttgctacttgtgagccgaactgctactgcatcaaa  
ccgtgcatgtatacacttaagtactacagtatataattaaaatggagacttacatccctaaacttgctaaccgtagcatc  
ctagatcaaaattatttctaagtatctggctcatcatctattagcatgctgaatcctaaaacctttctacctctggct  
ctcatgcaactcccttctctgacctgcatcaactaactgcaccacccgTTTTTTTTTTTTTTTTTTTTTgtgtgtggatgcaatga  
tgaattgatgatactgatgacgacctctactttacaggaagtaccttagcccttgtagcagatgggtgtctcacgagaca  
aaatcttaacgaactactgaaa

>B73\_AY108388

gtgacgatcatcttgcccttgttctcctgtctcgaagcgagcctgaagacgcacttaaaaggatcactgtacgaaccttc  
agccaggggaagctggaacgcgagaagaagagt cagttagctagaatgtgtgtgtacg-----  
aaccttcaaacaagctgccaggtttgctccggaagaaatgccacgagcaggccctctccctggccagcctcctcgcat  
tcgccatggcctcctcgggtgctcacggtgacggtctcgtcgatgaccgaggtgtccagaacttcaggtagaaacctggg  
cctactccctggatTTTTatgcttgccaggcgccacctgaagaacaccaat---gcttaccaatgtgcagatg-----  
-----cagtgtctaattcttat-actagcaaatactgtatTTTTTgtaaggccgct--  
gctcaaggcttcgaaaagattgtttc---

>Oh43\_AY108388

gtgacgatcatcttgcccttgttctcctgtctcgaagcgagcctgaagacgcacttaaaaggatcactgtacgaaccttc  
agccaggggaagctggaacgcgagaagaagagt cagttagctagaatgtgtgtgtacg-----  
aaccttcaaacaagctgccaggtttgctccggaagaaatgccacgagcaggccctctccctggccagcctcctcgcat  
tcgccatggcctcctcgggtgctcacggtgacggtctcgtcgatgaccgaggtgtccagaacttcaggtagaaacctggg  
cctactccctggatTTTTatgcttgccaggcgccacctgaagaacaccaat---gcttaccaatgtgcagatg-----  
-----cagtgtctaattcttat-actagcaaatactgtatTTTTTgtaaggccgct--  
gctcaaggcttcgaaaagattgtttc---

>IL14H\_AY108388

gtgacgatcatcttgcccttgttctcctgtctcgaagcgagcctgaagacgcacttaaaaggatcactgtacgaaccttc  
agccaggggaagctggaacgcgagaagaagagt cagttagctagaatgtgtgtgtacg-----  
aaccttcaaacaagctgccaggtttgctccggaagaaatgccacgagcaggccctctccctggccagcctcctcgcat  
tcgccatggcctcctcgggtgctcacggtgacggtctcgtcgatgaccgaggtgtccagaacttcaggtagaaacctggg  
cctactccctggatTTTTatgcttgccaggcgccacctgaagaacaccaat---gcttaccaatgtgcagatg-----  
-----cagtgtctaattcttat-actagcaaatactgtatTTTTTgtaaggccgct--  
gctcaaggcttcgaaaagattgtttc---

>Mo17\_AY108388

gtgacgatcatcttgcccttgttctcctgtctcgaagcga-  
cctgaagacgcacttaaaaggatcactgtacgaaccttcagccaggggaagctggaacgcgagaagaagagt cagttagct  
agaatgtgtgtgtacg-----  
aaccttcaaacaagctgccaggtttgctccggaagaaatgccacgagcaggccctctccctggccagcctcctcgcat  
tcgccatggcctcctcgggtgctcacggtgacggtctcgtcgatgaccgaggtgtccagaacttcaggtagaaacctggg  
cctactccctggatTTTTatgcttgccaggcgccacctgaagaacaccaat---gcttaccaatgtgcagatg-----  
-----cagtgtctaattcttat-actagcaaatactgtatTTTTTgtaaggccgct--  
gctcaaggcttcgaaaagattgtttc---

>Ky21\_AY108388

---acgatcatcttgcccttgttctcctgtctcgaagcga-  
cctgaagacgcacttaaaaggatcactgtacgaaccttcagccaggggaagctggaacgcgagaagaagagt cagttagct  
agaatgtgtgtgtacg-----  
aaccttcaaacaagctgccaggtttgctccggaagaaatgccacgagcaggccctctccctggccagcctcctcgcat  
tcgccatggcctcctcgggtgctcacggtgacggtctcgtcgatgaccgaggtgtccagaacttcaggtagaaacctggg  
cctactccctggatTTTTatgcttgccaggcgccacctgaagaacaccaat---gcttaccaatgtgcagatg-----  
-----cagtgtctaattcttat-actagcaaatactgtatTTTTTgtaaggccgct--  
gctcaaggcttcgaaaagattgtttc---

>M37W\_AY108388

gagtcaactgctctttctgcatctgtgtagcactacctgaaatcactgggctttctgcaggct-caacgca  
gagtcaactgctctttctgcatctgtgtagcactacctgaaatcactgggctttctgcaggct-caacgca

--gacgatcatcttgcccttggttctcctgtctcgaagcga-  
cctgaagacgcacttaaaaggatcactgtacgaaccttcagccaggggaagctggaacgcgagaagaagagt cagttagct  
agaatgtgtgtgtacg-----  
aaccttcaaacaagctgccaggtttgctccggaagaaatgccacgagcaggccctcttccctggccagcctcctcgcat  
tcgccatggcctcctcgggtgctcacggtgacggtctcgtcgatgaccgaggtgtccagaacttcaggtagaaaccctggg  
cctactccctggatTTTTatgcttgccagggcgcgccacctgaagaacaccaat---gcttaccaatgtgcagatg-----  
-----cagtgctaattcttat-actagcaaatactgtatTTTTgttaaggccgct--  
gctcaaggcttcgaaaagattgtttc---  
gagtcaactgctctttctgcatctgtgtagcactacctgaaatcactgggctttctgcaggct-caacgca  
>HP301\_AY108388

-----  
ttaaaggatcactgtacgaaccttcagccaggggaagctggaacgcgagaagaagagt cagttagctagaatgtgtgtgt  
acg-----  
aaccttcaaacaagctgccaggtttgctccggaagaaatgccacgagcaggccctcttccctggccagcctcctcgcat  
tcgccatggcctcctcgggtgctcacggtgacggtctcgtcgatgaccgaggtgtccagaacttcaggtagaaaccctggg  
cctactccctggatTTTTatgcttgccagggcgcgccacctgaagaacaccaat---gcttaccaatgtgcagatg-----  
-----cagtgctaattcttat-actagcaaatactgtatTTTTgttaaggccgct--  
gctcaaggcttcgaaaagattgtttc---  
gagtcaactgctctttctgcatctgtgtagcactacctgaaatcactgggctttctgcaggct-caacgca  
>CML247\_AY108388

---acgatcatcttgcccttggttctcctgtctcgaagcga-  
cctgaagacgcacttaaaaggatcactgtacgaaccttcagccaggggaagctggaacgcgagaagaagagt cagttagct  
agaatgtgtgtgtacg-----  
aaccttcaaacaagctgccaggtttgctccggaagaaatgccacgagcaggccctcttccctggccagcctcctcgcat  
tcgccatggcctcctcgggtgctcacggtgacggtctcgtcgatgaccgaggtgtccagaacttcaggtagaaaccctggg  
cctactccctggatTTTTatgcttgccagggcgcgccacctgaagaacaccaat---gcttaccaatgtgcagatg-----  
-----cagtgctaattcttat-actagcaaatactgtatTTTTgttaaggccgct--  
gctcaaggcttcgaaaagattgtttc---  
gagtcaactgctctttctgcatctgtgtagcactacctgaaatcactgggctttctgcagg-----  
>NC350\_AY108388

---  
acgatcatcttgcccttggttctcctgtctcgaagcgcagcctgaagacgcacttaaaaggatcactgtacgaaccttcagc  
caggggaagctggaacgcgagaagaagagt cagttagctagaatgtgtgtgtacg-----  
aaccttcaaacaagctgccaggtttgctccggaagaaatgccacgagcaggccctcttccctggccagcctcctcgcat  
tcgccatggcctcctcgggtgctcacggtgacggtctcgtcgatgaccgaggtgtccagaacttcaggtagaaaccctggg  
cctactccctggatTTTTatgcttgccagggcgcgccacctgaagaacaccaat---gcttaccaatgtgcagatg-----  
-----cagtgctaattcttat-actagcaaatactgtatTTTTgttaaggccgct--  
gctcaaggcttcgaaaagattgtttc---  
gagtcaactgctctttctgcatctgtgtagcactacctgaaatcactgggctttctgcaggct-caacgca  
>Ki3\_AY108388

gtgacgatcatcttgcccttggttctcctgtctcgaagcga-  
cctgaagacgcacttaaaaggatcactgtacgaaccttcagccaggggaagctggaacgcgagaagaagagt cagttagct  
agaatgtgtgtgtacg-----  
aaccttcaaacaagctgccaggtttgctccggaagaaatgccacgagcaggccctcttccctggccagcctcctcgcat  
tcgccatggcctcctcgggtgctcacggtgacggtctcgtcgatgaccgaggtgtccagaacttcaggtagaaaccctggg  
cctactccctggatTTTTatgcttgccagggcgcgccacctgaagaacaccaat---gcttaccaatgtgcagatg-----  
-----cagtgctaattcttat-actagcaaatactgtatTTTTgttaaggccgct--  
gctcaaggcttcgaaaagattgtttc---  
gagtcaactgctctttctgcatctgtgtagcactacctgaaatcactgggctttctgcaggct-caa----  
>Kill\_AY108388

---acgatcatcttgcccttggttctcctgtctcgaagcga-  
cctgaagacgcacttaaaaggatcactgtacgaaccttcagccaggggaagctggaacgcgagaagaagagt cagttagct  
agaatgtgtgtgtacg-----  
aaccttcaaacaagctgccaggtttgctccggaagaaatgccacgagcaggccctcttccctggccagcctcctcgcat  
tcgccatggcctcctcgggtgctcacggtgacggtctcgtcgatgaccgaggtgtccagaacttcaggtagaaaccctggg  
cctactccctggatTTTTatgcttgccagggcgcgccacctgaagaacaccaat---gcttaccaatgtgcagatg-----  
-----cagtgctaattcttat-actagcaaatactgtatTTTTgttaaggccgct--

gctcaaggcttcgaaaagattgtttc---  
gagtcaactgctctttctgcatctgtgtagcactacctgaaatcactgggctttctgcaggct-caacgca  
>CML333\_AY108388  
-----tcatcttgcccttgttctcctgtctcgaagcga-  
cctgaagacgcacttaaaaggatcactgtacgaaccttcagccaggggaagctggaacgcgagaagaagagt cagttagct  
agaatgtgtgtgtacg-----  
aaccttcaaacaagctgccaggtttgctccggaagaaatgccacgagcaggccctcttccctggccagcctcctcgcat  
tcgccatggcctcctcgggtgctcacggtgacggtctcgtcgatgaccgaggtgtccagaacttcaggtagaaaccctggg  
cctactccttgattttatgcttgccagggcgcgccacctgaagaacaccaat---gcttaccaatgtgcagatg-----  
-----cagtgctaattcttat-actagcaaatactgtatTTTTgttaaggccgct--  
gctcaaggcttcgaaaagattgtttc---  
gagtcaactgctctttctgcatctgtgtagcactacctgaaatcactgggctt-----  
>CML322\_AY108388  
---acgatcatcttgcccttgttctcctgtctcgaagcga-  
cctgaagacgcacttaaaaggatcactgtacgaaccttcagccaggggaagctggaacgcgagaagaagagt cagttagct  
agaatgtgtgtgtacg-----  
aaccttcaaacaagctgccaggtttgctccggaagaaatgccacgagcaggccctcttccctggccagcctcctcgcat  
tcgccatggcctcctcgggtgctcacggtgacggtctcgtcgatgaccgaggtgtccagaacttcaggtagaaaccctggg  
cctactccttgattttatgcttgccagggcgcgccacctgaagaacaccaat---gcttaccaatgtgcagatg-----  
-----cagtgctaattcttat-actagcaaatactgtatTTTTgttaaggccgct--  
gctcaaggcttcgaaaagattgtttc---  
gagtcaactgctctttctgcatctgtgtagcactacctgaaatcactgggctttctgcaggct-caacgca  
>CML69\_AY108388  
---acgatcatcttgcccttgttctcctgtctcgaagcga-  
cctgaagacgcacttaaaaggatcactgtacgaaccttcagccaggggaagctggaacgcgagaagaagagt cagttagct  
agaatgtgtgtgtacg-----  
aaccttcaaacaagctgccaggtttgctccggaagaaatgccacgagcaggccctcttccctggccagcctcctcgcat  
tcgccatggcctcctcgggtgctcacggtgacggtctcgtcgatgaccgaggtgtccagaacttcaggtagaaaccctggg  
cctactccttgattttatgcttgccagggcgcgccacctgaagaacaccaat---gcttaccaatgtgcagatg-----  
-----cagtgctaattcttat-actagcaaatactgtatTTTTgttaaggccgct--  
gctcaaggcttcgaaaagattgtttc---  
gagtcaactgctctttctgcatctgtgtagcactacctgaaatcactgggctttctgcaggct-caacgc-  
>Gordo\_CHH 160\_AY108388  
gtgacgatcatcttgcccttgttctcctgtctcgaagcga-  
cctgaagacaaaacttaaaaggatcactgtacgaaccttcagccaggggaagctggaacgcgagaagaagagt cagttagct  
agaatgtgtgtgtacg-----  
aaccttcaaacaagctgccaggtttgctccggaagaaatgccacgagcaggccctcttccctggccagcctcctcgcat  
tcgccatggcctcctcgggtgctcacggtgacggtctcgtcgatgaccgaggtgtccagaacttcaggtagaaaccctggg  
cctactccttgattttatgcttgccagggcgcgccacctgaagaacaccaat---gcttaccaatgtgcagatg-----  
-----cagtgctaattcttat-actagcaaatactgtatTTTTgttaaggccgct--  
gctcaaggcttcgaaaagattgtttc---  
gagtcaactgctctttctgcatctgtgtagcactacctgaaatcactgggctttctgcaggct-caacgca  
>Guirua\_MAG 450\_AY108388  
gtgacgatcatcttgcccttgttctcctgtctcgaagcga-  
cctgaagacgcacttaaaaggatcactgtacgaaccttcagccaggggaagctggaacgcgagaagaagagt cagttagct  
agaatgtgtgtgtacg-----  
aaccttcaaacaagctgccaggtttgctccggaagaaatgccacgagcaggccctcttccctggccagcctcctcgcat  
tcgccatggcctcctcgggtgctcacggtgacggtctcgtcgatgaccgaggtgtccagaacttcaggtagaaaccctggg  
cctactccttgattttatgcttgccagggcgcgccacctgaagaacaccaat---gcttaccaatgtgcagatg-----  
-----cagtgctaattcttat-actagcaaatactgtatTTTTgttaaggccgct--  
gctcaaggcttcgaaaagattgtttc---  
gagtcaactgctctttctgcatctgtgtagcactacctgaaatcactgggctttctgcaggct-caacgca  
>Nal-tel\_YUC 7\_AY108388  
gtgacgatcatcttgcccttgttctcctgtctcgaagcga-  
cctgaagacgcacttaaaaggatcactgtacgaaccttcagccaggggaagctggaacgcgagaagaagagt cagttagct  
agaatgtgtgtgtacg-----  
aaccttcaaacaagctgccaggtttgctccggaagaaatgccacgagcaggccctcttccctggccagcctcctcgcat

tgcgatggcctcctcgggtgctcacgggtgacgggtctcgtcgatgaccgaggtgtccagaacttcaggtagaaaccctggg  
cctactccctggatTTTTATGCTTgCCAGGCGCGCCACCTGAAGAACACCAAT---GCTTACCAATGTGCAGATG-----  
-----cagtgctaattcttat-actagcaaatactgtatTTTTGTaaggccgct--  
gctcaaggcttcgaaaagattgtttc---  
gagtcaactgctctttctgcatctgtgtagcactacctgaaatcactgggctttctgcaggct-caacgca  
>Pisscotunto\_APC 13\_AY108388  
gtgacgatcatcttgcccttgttctcctgtctcgaagcga-  
cctgaagacgcacttaaaaggatcactgtacgaaccttcagccaggggaagctggaacgcgagaagaagagttagct  
agaatgtgtgtgtacg-----  
aaccttcaaacaagctgccaggtttgctccggaagaaatgccacgagcagggccctcttccctggccagcctcctcgcat  
tcgcatggcctcctcgggtgctcacgggtgacgggtctcgtcgatgaccgaggtgtccagaacttcaggtagaaaccctggg  
cctactccctggatTTTTATGCTTgCCAGGCGCGCCACCTGAAGAACACCAAT---GCTTACCAATGTGCAGATG-----  
-----cagtgctaattcttat-actagcaaatactgtatTTTTGTaaggccgct--  
gctcaaggcttcgaaaagattgtttc---  
gagtcaactgctctttctgcatctgtgtagcactacctgaaatcactgggctttctgcaggct-caacgca  
>Serrano\_GUA 14\_AY108388  
-----tggtctcctgtctcgaagcga-  
cctgaagacgcacttaaaaggatcactgtacgaaccttcagccaggggaagctggaacgcgagaagaagagttagct  
agaatgtgtgtgtacg-----  
aaccttcaaacaagctgccaggtttgctccggaagaaatgccacgagcagggccctcttccctggccagcctcctcgcat  
tcgcatggcctcctcgggtgctcacgggtgacgggtctcgtcgatgaccgaggtgtccagaacttcaggtagaaaccctggg  
cctactccctggatTTTTATGCTTgCCAGGCGCGCCACCTGAAGAACACCAAT---GCTTACCAATGTGCAGATG-----  
-----cagtgctaattcttat-actagcaaatactgtatTTTTGTaaggccgct--  
gctcaaggcttcgaaaagattgtttc---  
gagtcaactgctctttctgcatctgtgtagcactacctgaaatcactgggctttctgcaggct-caacgca  
>Bolita\_OAX 68\_AY108388  
-----ttctcctgtctcgaagcga-  
cctgaagacgcacttaaaaggatcactgtacgaaccttcagccaggggaagctggaacgcgagaagaagagttagct  
agaatgtgtgtgtacg-----  
aaccttcaaacaagctgccaggtttgctccggaagaaatgccacgagcagggccctcttccctggccagcctcctcgcat  
tcgcatggcctcctcgggtgctcacgggtgacgggtctcgtcgatgaccgaggtgtccagaacttcaggtagaaaccctggg  
cctactccctggatTTTTATGCTTgCCAGGCGCGCCACCTGAAGAACACCAAT---GCTTACCAATGTGCAGATG-----  
-----cagtgctaattcttat-actagcaaatactgtatTTTTGTaaggccgct--  
gctcaaggcttcgaaaagattgtttc---  
gagtcaactgctctttctgcatctgtgtagcactacctgaaatcactgggctttctgca-----  
>Cateto\_Sulino\_URG 11\_AY108388  
gtgacgatcatcttgcccttgttctcctgtctcgaagcga-  
cctgaagacgcacttaaaaggatcactgtacgaaccttcagccaggggaagctggaacgcgagaagaagagttagct  
agaatgtgtgtgtacg-----  
aaccttcaaacaagctgccaggtttgctccggaagaaatgccacgagcagggccctcttccctggccagcctcctcgcat  
tcgcatggcctcctcgggtgctcacgggtgacgggtctcgtcgatgaccgaggtgtccagaacttcaggtagaaaccctggg  
cctactccctggatTTTTATGCTTgCCAGGCGCGCCACCTGAAGAACACCAAT---GCTTACCAATGTGCAGATG-----  
-----cagtgctaattcttat-actagcaaatactgtatTTTTGTaaggccgct--  
gctcaaggcttcgaaaagattgtttc---  
gagtcaactgctctttctgcatctgtgtagcactacctgaaatcactgggctttctgcaggct-caacgca  
>Chalqueno\_MEX 48\_AY108388  
-----ttccttgttctcctgtctcgaagcga-  
cctgaagacgcactcaaaaggatcactgtacgaaccttcagccagggaaactggaacgcgagaagaagagttagct  
agaatgtgtgtgtacg-----  
aaccttcaagcaagctgccaggtttgctccggaagaaatgccacgagcagggccctcttccctggccagctcctcgct  
tcgcatggcctcctcgggtgctcacgggtgacgggtctcgtcgatgaccgaggtgtccagaacttcaggtagaaaccctggg  
cctactccctggatTTTTATGCTTgCCAGGCGCGCCACCTGAAGAACACCAAT---GCTTACCAATGTGCAGATG-----  
-----cagtgctaattcttat-actagcaataactgtatTTTTGTaaggccgct--  
gctcagggcttcgaaaagattgtttc---  
gagttaactgctctttctgcatctgtgtagcactacctgaaatcactgggctttctgcaggct-caacgca  
>Chapalote\_SIN 2\_AY108388  
gtgacgatcatcttgcccttgttctcctgtctcgaagcga-

cctgaagacgcacttaaaaggatcactgtacgaaccttcagccaggaagctggaacgcgagaagaagagt cagttagct  
agaatgtgtgtgtacg-----  
aaccttcaaacaagctgccagggttgctccggaagaaatgccacagagcaggccctcttccctggccagcctcctcgcat  
tcgccatggcctcctcgggtgctcacggtgacgggtctcgtcgatgaccgaggtgtccagaacttcaggtagaaaccctggg  
cctactccctggatTTTTatgcttgccaggcgccacctgaagaacaccaat---gcttaccaatgtgcagatg-----  
-----cagtgctaattcttat-actagcaaatactgtatTTTTgttaaggccgct--  
gctcaaggcttcgaaaagattgtttc---  
gagtcaactgctctttctgcatctgtgtagcactacctgaaatcactgggctttctgcaggct-caacgca  
>Conico\_PUE 32\_AY108388  
-----tgttctcctgtctcgaagcga-  
cctgaagacgcacttaaaaggatcactgtacgaaccttcagccaggaagctggaacgcgagaagaagagt cagttagct  
agaatgtgtgtgtacg-----  
aaccttcaaacaagctgccagggttgctccggaagaaatgccacagagcaggccctcttccctggccagcctcctcgcat  
tcgccatggcctcctcgggtgctcacggtgacgggtctcgtcgatgaccgaggtgtccagaacttcaggtagaaaccctggg  
cctactccctggatTTTTatgcttgccaggcgccacctgaagaacaccaat---gcttaccaatgtgcagatg-----  
-----cagtgctaattcttat-actagcaaatactgtatTTTTgttaaggccgct--  
gctcaaggcttcgaaaagattgtttc---  
gagtcaactgctctttctgcatctgtgtagcactacctgaaatcactgggctttctgcaggct-caacgca  
>Costeno\_VEN 453\_AY108388  
gtgacgatcatcttgcccttggttctcctgtctcgaagcga-  
cctgaagacgcacttaaaaggatcactgtacgaaccttcagccaggaagctggaacgcgagaagaagagt cagttagct  
agaatgtgtgtgtacg-----  
aaccttcaaacaagctgccagggttgctccggaagaaatgccacagagcaggccctcttccctggccagcctcctcgcat  
tcgccatggcctcctcgggtgctcacggtgacgggtctcgtcgatgaccgaggtgtccagaacttcaggtagaaaccctggg  
cctactccctggatTTTTatgcttgccaggcgccacctgaagaacaccaat---gcttaccaatgtgcagatg-----  
-----cagtgctaattcttat-actagcaaatactgtatTTTTgttaaggccgct--  
gctcaaggcttcgaaaagattgtttc---  
gagtcaactgctctttctgcatctgtgtagcactacctgaaatcactgggctttctgcaggct-caacgca  
>Cristalino Norteno\_CHI 349\_AY108388  
gtgacgatcatcttgcccttggttctcctgtctcgaagcga-  
cctgaagacgcacttaaaaggatcactgtacgaaccttcagccaggaagctggaacgcgagaagaagagt cagttagct  
agaatgtgtgtgtacg-----  
aaccttcaaacaagctgccagggttgctccggaagaaatgccacagagcaggccctcttccctggccagcctcctcgcat  
tcgccatggcctcctcgggtgctcacggtgacgggtctcgtcgatgaccgaggtgtccagaacttcaggtagaaaccctggg  
cctactccctggatTTTTatgcttgccaggcgccacctgaagaacaccaat---gcttaccaatgtgcagatg-----  
-----cagtgctaattcttat-actagcaaatactgtatTTTTgttaaggccgct--  
gctcaaggcttcgaaaagattgtttc---  
gagtcaactgctctttctgcatctgtgtagcactacctgaaatcactgggctttctgcaggct-caacgca  
>Dzit Bacal\_GUA 131\_AY108388  
gtgacgatcatcttgcccttggttctcctgtctcgaagcga-  
cctgaagacgcacttaaaaggatcactgtacgaaccttcagccaggaagctggaacgcgagaagaagagt cagttagct  
agaatgtgtgtgtacg-----  
aaccttcaaacaagctgccagggttgctccggaagaaatgccacagagcaggccctcttccctggccagcctcctcgcat  
tcgccatggcctcctcgggtgctcacggtgacgggtctcgtcgatgaccgaggtgtccagaacttcaggtagaaaccctggg  
cctactccctggatTTTTatgcttgccaggcgccacctgaagaacaccaat---gcttaccaatgtgcagatg-----  
-----cagtgctaattcttat-actagcaaatactgtatTTTTgttaaggccgct--  
gctcaaggcttcgaaaagattgtttc---  
gagtcaactgctctttctgcatctgtgtagcactacctgaaatcactgggctttctgcaggct-caacgca  
>Jalisco\_Benz 967\_AY108388  
gtgacgatcatcttgcccttggttctcctgtctcgaagcga-  
cctgaagacgcacttaaaaggatcactgtacgaaccttcagccaggaagctggaacgcgagaagaagagt cagttagct  
agaatgtgtgtgtacg-----  
aaccttcaaacaagctgccagggttgctccggaagaaatgccacagagcaggccctcttccctggccagcctcctcgcat  
tcgccatggcctcctcgggtgctcacggtgacgggtctcgtcgatgaccgaggtgtccagaacttcaggtagaaaccctggg  
cctactccctggatTTTTatgcttgccaggcgccacctgaagaacaccaat---gcttaccaatgtgcagatg-----  
-----cagtgctaattcttat-actagcaaatactgtatTTTTgttaaggccgct--  
gctcaaggcttcgaaaagattgtttc---

gagtcaactgctctttctgcatctgtgtagcactacctgaaatcactgggctttctgcaggct-caacgca  
>Balsas\_Beadle & Kato Site 4\_AY108388  
-----ctcgaagcga-  
cctgaagacgcacttaaaaggatcactgtacgaaccttcagccaggggaagctggaacgcgagaagaagagtcagttagct  
agaatgtgtgtgtacg-----  
aaccttcaaacaagctgccagggttgctccggaagaaatgccacagcagcaggccctcttccctggccagcctcctcgcat  
tcgccatggcctcctcgggtgctcacggtgacggtctcgtcgatgaccgaggtgtccagaacttcaggtagaaaccctggg  
cctactccctggatTTTTatgcttgccaggcgcgccacctgaagaacaccaat---gcttaccaatgtgcagatg-----  
-----cagtgctaattcttat-actagcaaatactgtatTTTTgttaaggccgct--  
gctcaaggcttcgaaaagattgtttc---  
gagtcaactgctctttctgcatctgtgtagcactacctgaaatcactgggctttctgcaggct-caacgca  
>Balsas\_Kato Site 4\_AY108388  
----cgatcatcttgcccttgttctcctgtctcgaagcga-  
cctgaagacgcacttaaaaggatcactgtacgaaccttcagccaggggaagctggaacgcgagaagaagagtcagttagct  
agaatgtgtgtgtacg-----  
aaccttcaaacaagctgccagggttgctccggaagaaatgccacagcagcaggccctcttccctggccagcctcctcgcat  
tcgccatggcctcctcgggtgctcacggtgacggtctcgtcgatgaccgaggtgtccagaacttcaggtagaaaccctggg  
cctactccctggatTTTTatgcttgccaggcgcgccacctgaagaacaccaat---gcttaccaatgtgcagatg-----  
-----cagtgctaattcttat-actagcaaatactgtatTTTTgttaaggccgct--  
gctcaaggcttcgaaaagattgtttc---  
gagtcaactgctctttctgcatctgtgtagcactacctgaaatcactgggctttctgcaggct-caacgca  
>Balsas\_Wilkes Site 6\_AY108388  
gtgacgatcatcttgcccttgttctcctgtctcgaagcga-  
cctgaagacgcacttaaaaggatcactgtacgaaccttcagccaggggaagctggaacgcgagaagaagagtcagttagct  
agaatgtgtgtgtacg-----  
aaccttcaaacaagctgccagggttgctccggaagaaatgccacagcagcaggccctcttccctggccagcctcctcgcat  
tcgccatggcctcctcgggtgctcacggtgacggtctcgtcgatgaccgaggtgtccagaacttcaggtagaaaccctggg  
cctactccctggatTTTTatgcttgccaggcgcgccacctgaagaacaccaat---gcttaccaatgtgcagatg-----  
-----cagtgctaattcttat-actagcaaatactgtatTTTTgttaaggccgct--  
gctcaaggcttcgaaaagattgtttc---  
gagtcaactgctctttctgcatctgtgtagcactacctgaaatcactgggctttctgcaggct-caacgca  
>Balsas\_INIFAP JSP y Lo5130\_AY108388  
gtgacgatcatcttgcccttgttctcctgtctcgaagcga-  
cctgaagacgcacttaaaaggatcactgtacgaaccttcagccaggggaagctggaacgcgagaagaagagtcagttagct  
agaatgtgtgtgtacg-----  
aaccttcaaacaagctgccagggttgctccggaagaaatgccacagcagcaggccctcttccctggccagcctcctcgcat  
tcgccatggcctcctcgggtgctcacggtgacggtctcgtcgatgaccgaggtgtccagaacttcaggtagaaaccctggg  
cctactccctggatTTTTatgcttgccaggcgcgccacctgaagaacaccaat---gcttaccaatgtgcagatg-----  
-----cagtgctaattcttat-actagcaaatactgtatTTTTgttaaggccgct--  
gctcaaggcttcgaaaagattgtttc---  
gagtcaactgctctttctgcatctgtgtagcactacctgaaatcactgggctttctgcaggct-caacgca  
>Balsas\_INIFAP JSG y LOS 119\_AY108388  
gtgacgatcatcttgcccttgttctcctgtctcgaagcga-  
cctgaagacgcacttaaaaggatcactgtacgaaccttcagccaggggaagctggaacgcgagaagaagagtcagttagct  
agaatgtgtgtgtacg-----  
aaccttcaaacaagctgccagggttgctccggaagaaatgccacagcagcaggccctcttccctggccagcctcctcgcat  
tcgccatggcctcctcgggtgctcacggtgacggtctcgtcgatgaccgaggtgtccagaacttcaggtagaaaccctggg  
cctactccctggatTTTTatgcttgccaggcgcgccacctgaagaacaccaat---gcttaccaatgtgcagatg-----  
-----cagtgctaattcttat-actagcaaatactgtatTTTTgttaaggccgct--  
gctcaaggcttcgaaaagattgtttc---  
gagtcaactgctctttctgcatctgtgtagcactacctgaaatcactgggctttctgcaggct-caacgca  
>Jalisco\_INIFAP JSG y MAS 401\_AY108388  
-----gtctcgaagcga-  
cctgaagacgaacttaaaaggatcactgtacgaaccttcagccaggggaaactggaacgcgagaagaagattcagttagct  
aggatgtgtgtgtacg-----  
aaccttcaagcaagctgccagggttgctccagaagaaatgccacagcagcaggccctcttccctggccagcctcctcgcgt  
tcgccatggcctcctcgggtgctcacggtgacggtctcgtcgatgaccgaggtgtccagaacttcaggtagaaaccctggg



cctactccctggatTTTTatgcttgccaggcgcgccacctgaagaataccaat---gcttaccaatgtgcagatg-----  
-----cagtgctaattcttat-actagcaaatactgtatTTTTgttaaggccgct--  
gctcaaggcttcgaaaagattgtttc---  
gagtcaactgctctttctgcatctgtgtagcactacctgaaatcactgggctttctgcaggct-caacgca  
>Balsas\_CIMMYT 8783\_AY108388  
gtgacgatcatcttgcccttgttctcctgtctcgaagcga-  
cctgaagacgcacttaaaaggatcactgtacgaaccttcagccagggaaagctggaacgcgagaagaagagtcagttagct  
agaatgtgtgtgtacg-----  
aaccttcaaacaactgccagggttgctccggaagaaatgccacgagcaggccctcttccctggccagcctcctcgcat  
tcgccatggcctcctcgggtgctcacggtgacgggtctcgtcgatgaccgaggtgtccagaacttcaggtagaaaccctggg  
cctactccctggatTTTTatgcttgccaggcgcgccacctgaagaacaccaat---gcttaccaatgtgcagatg-----  
-----cagtgctaattcttat-actagcaaatactgtatTTTTgttaaggccgct--  
gctcaaggcttcgaaaagattgtttc---  
gagtcaactgctctttctgcatctgtgtagcactacctgaaatcactgggctttctgcaggct-caacgca  
>Oaxaca\_INIFAP JSG 197\_AY108388  
gtgacgatcatcttgcccttgttctcctgtctcgaagcga-  
cctgaagacgcacttaaaaggatcactgtacgaaccttcagccagggaaagctggaacgcgagaagaagagtcagttagct  
agaatgtgtgtgtacg-----  
aaccttcaaacaagctgccagggttgctccggaagaaatgccacgagcaggccctcttccctggccagcctcctcgcat  
tcgccatggcctcctcgggtgctcacggtgacgggtctcgtcgatgaccgaggtgtccagaacttcaggtagaaaccctggg  
cctactccctggatTTTTatgcttgccaggcgcgccacctgaagaacaccaat---gcttaccaatgtgcagatg-----  
-----cagtgctaattcttat-actagcaaatactgtatTTTTgttaaggccgct--  
gctcaaggcttcgaaaagattgtttc---  
gagtcaactgctctttctgcatctgtgtagcactacctgaaatcactgggctttctgcaggct-caacgca  
>Balsas\_INIFAP JSG y LOS 109\_AY108388  
gtgacgatcatcttgcccttgttctcctgtctcgaagcga-  
cctgaagacgcacttaaaaggatcactgtacgaaccttcagccagggaaagctggaacgcgagaagaagagtcagttagct  
agaatgtgtgtgtacg-----  
aaccttcaaacaagctgccagggttgctccggaagaaatgccacgagcaggccctcttccctggccagcctcctcgcat  
tcgccatggcctcctcgggtgctcacggtgacgggtctcgtcgatgaccgaggtgtccagaacttcaggtagaaaccctggg  
cctactccctggatTTTTatgcttgccaggcgcgccacctgaagaacaccaat---gcttaccaatgtgcagatg-----  
-----cagtgctaattcttat-actagcaaatactgtatTTTTgttaaggccgct--  
gctcaaggcttcgaaaagattgtttc---  
gagtcaactgctctttctgcatctgtgtagcactacctgaaatcactgggctttctgcaggct-ca-----  
>Balsas\_INIFAP JSG 378\_AY108388  
gtgacgatcatcttgcccttgttctcctgtctcgaagcga-  
cctgaagacgcacttaaaaggatcactgtacgaaccttcagccagggaaagctggaacgcgagaagaagagtcagttagct  
agaatgtgtgtgtacg-----  
aaccttcaaacaagctgccagggttgctccggaagaaatgccacgagcaggccctcttccctggccagcctcctcgcat  
tcgccatggcctcctcgggtgctcacggtgacgggtctcgtcgatgaccgaggtgtccagaacttcaggtagaaaccctggg  
cctactccctggatTTTTatgcttgccaggcgcgccacctgaagaacaccaat---gcttaccaatgtgcagatg-----  
-----cagtgctaattcttat-actagcaaatactgtatTTTTgttaaggccgct--  
gctcaaggcttcgaaaagattgtttc---  
gagtcaactgctctttctgcatctgtgtagcactacctgaaatcactgggctttctgcaggct-caacgca  
>Balsas\_INIFAP JSG 374\_AY108388  
gtgacgatcatcttgcccttgttctcctgtctcgaagcga-  
cctgaagacgcacttaaaaggatcactgtacgaaccttcagccagggaaagctggaacgcgagaagaagagtcagttagct  
agaatgtgtgtgtacg-----  
aaccttcaaacaagctgccagggttgctccggaagaaatgccacgagcaggccctcttccctggccagcctcctcgcat  
tcgccatggcctcctcgggtgctcacggtgacgggtctcgtcgatgaccgaggtgtccagaacttcaggtagaaaccctggg  
cctactccctggatTTTTatgcttgccaggcgcgccacctgaagaacaccaat---gcttaccaatgtgcagatg-----  
-----cagtgctaattcttat-actagcaaatactgtatTTTTgttaaggccgct--  
gctcagggttccaaaagattgtttc---  
gagttactgctctttctgcatctgtgtagcactacctgaaatcactgggctttctgcaggct-caacgca  
>Balsas\_INIFAP JSG y LOS 161\_AY108388  
-----ctcgaagcga-  
cctgaagacgaacttaaaaggatcactgtacgaaccttcagccagggaaactggaacgcgagaagaagattcagttagct

aggatgtgtgtgtacg-----  
aaccttcaagcaagctgccaggtttgctccagaagaaatgccacagagcagaccctcttccctggccagtctcctcgcgt  
tcgccatggcctcctcgggtgctcacggtgacgggtctcgtcgatgaccgaggtgtccagaacttcaggtagaaaccctggg  
cctactccctggatTTTTatgcttgccagggcgcgccacctgaagaacaccaat---gcttaccaatgtgcagatg-----  
-----cagtgctaattcttat-actagcaaatactgtTTTTTTgtaaggccgct--  
gctcaaggcttccaaaagattgtttc---  
gagtcaactgctctttctgcatctgtgtagcactacctgaaatcactgggctttctgcaggct-caacgca  
>Balsas\_CIMMYT 11355\_AY108388  
gtgacgatcatcttgcccttgttctcctgtctcgaagcga-  
cctgaagacgcacttaaaaggatcactgtacgaaccttcagccaggaagctggaacgcgagaagaagagt cagttagct  
agaatgtgtgtgtacg-----  
aaccttcaaacagctgccaggtttgctccggaagaaatgccacagagcagggcctcttccctggccagcctcctcgcgt  
tcgccatggcctcctcgggtgctcacggtgacgggtctcgtcgatgaccgaggtgtccagaacttcaggtagaaaccctggg  
cctactccctggatTTTTatgcttgccagggcgcgccacctgaagaacaccaat---gcttaccaatgtgcagatg-----  
-----cagtgctaattcttat-actagcaaatactgtTTTTTTgtaaggccgct--  
gctcaaggcttccaaaagattgtttc---  
gagtcaactgctctttctgcatctgtgtagcactacctgaaatcactgggctttctgcaggct-caacgca  
>Balsas\_USDA PI566686\_AY108388  
-----ctcgaagcga-  
cctgaagacgcacttaaaaggatcactgtacgaaccttcagccaggaagctggaacgcgagaagaagagt cagttagct  
agaatgtgtgtgtacg-----  
aaccttcaaacagctgccaggtttgctccggaagaaatgccacagagcagggcctcttccctggccagcctcctcgcgt  
tcgccatggcctcctcgggtgctcacggtgacgggtctcgtcgatgaccgaggtgtccagaacttcaggtagaaaccctggg  
cctactccctggatTTTTatgcttgccagggcgcgccacctgaagaacaccaat---gcttaccaatgtgcagatg-----  
-----cagtgctaattcttat-actagcaaatactgtTTTTTTgtaaggccgct--  
gctcaaggcttccaaaagattgtttc---  
gagtcaactgctctttctgcatctgtgtagcactacctgaaatcactgggctttctgcaggct-caacgca  
>Jalisco\_INIFAP JSG y MAS 264\_AY108388  
gtgacgatcatcttgcccttgttctcctgtctcgaagcga-  
cctgaagacgcactcaaaaggatcactgtacgaaccttcagccaggaactggaacgcgagaagaagagt cggttagct  
aaaatgtgtgtatg-----  
aaccttcaaacagctgccaggtttgctccggaagaaatgccacagagcagggcctcttccctggccagcctcctcgcgt  
tcgccatggcctcctcgggtgctcacggtgacgggtctcgtcgatgaccgaggtgtccagaacttcaggtagaaaccctggg  
cctactccctggatTTTTatgcttgccagggcgcgccacctgaagaataaccaat---gtttaccaatgtgcagatg-----  
-----cagtgctaattcttat-actagcaaatactgtTTTTTTgtaaggccgct--  
gctcaaggcttccaaaagattgtttc---  
gagtcaactgctctttctgcatctgtgtagcactacctgaaatcactgggctttctgcaggct-caacgca

>B73\_AY108552  
agaggggaaggagaatgctgcggtgctgttgcctcagctctgtacaaacagcaacaggttttgagctatagttcttcaaga  
gggtgcagtgccccctctagtcgccctttcacagtcaggaacaccgcgggcaagagagaaggttcgcagcttcgcacaag  
ccatatttcttaggtttaaaaaa--tgcagcggacactttttaat-----  
tgatggactctgatttgccttttgttgtgagggcacaagcgttctgagctacttccgcagccaaagacatgggaattca  
gcaaggagatagccttctgtttttt-cccggtttttt-----gttgtagtgtacattaagcg  
>Oh43\_AY108552  
agaggggaaggagaatgctgcggtgctgttgcctcagctctgtacaaacagcaacaggttttgagctatagttcttcaaga  
gggtgcagtgccccctctagtcgccctttcacagtcaggaacaccgcgggcaagagagaaggttcgcagcttcgcacaag  
ccatatttcttaggtttaaaaaa--tgcagcggacactttttaat-----  
tgatggactctgatttgccttttgttgtgagggcacaagcgttctgagctacttccgcagccaaagacatgggaattca  
gcaaggagatagccttctgtttttt-cccggtttttt-----gttgtagtgtacattaagcg  
>IL14H\_AY108552  
--  
aggggaaggagaatgctgcggtgctgttgcctcagctctgtacaaacagcaacaggttttgagctatagttcttcaagagg  
gtgcagtgccccctctagtcgccctttcacagtcaggaacaccgcgggcaagagagaaggttcgcagcttcgcacaagcc  
atatttcttaggtttaaaaaa--tgcagcggacactttttaat-----

tgatggactctgatttgctttttgttgtgcaggcacaagcgcttctgagctacttccgcagccaaagacatgggaattca  
gcaaggagatagccttctgtttttt-cccgtttttt-----gt-----

>Mo17\_AY108552

agaggggaaggagaatgctgcggtgctgttgcctcagctctgtacaaacagcaacaggttttgcagtatagttcttcaaga  
gggtgcagtgccccctctagtcgcccctttcacagtcaggaacaccgcgggcaagagagaaggttcgcagcttcgcacaag  
ccatatttcttaggttttaaaaaa--tgcagcggacactttttaat-----

tgatggactctgatttgctttttgttgtgcaggcacaagcgcttctgagctacttccgcagccaaagacatgggaattca  
gcaaggagatagccttctgtttttt-cccgtttttt-----gttgtagtgtacattaag--

>Ky21\_AY108552

agaggggaaggagaatgctgcggtgctgttgcctcagctctgtacaaacagcaacaggttttgcagtatagttcttcaaga  
gggtgcagtgccccctctagtcgcccctttcacagtcaggaacaccgcgggcaagagagaaggttcgcagcttcgcacaag  
ccatatttcttaggttttaaaaaa--tgcagcggacactttttaat-----

tgatggactctgatttgctttttgttgtgcaggcacaagcgcttctgagctacttccgcagccaaagacatgggaattca  
gcaaggagatagccttctgtttttt-cccgtttttt-----gttghta-----

>M37W\_AY108552

agaggggaaggagaatgctgcggtgctgttgcctcagctctgtacaaacagcaacaggttttgcagtatagttcttcaaga  
gggtgcagtgccccctctagtcgcccctttcacagtcaggaacaccgcgggcaagagagaaggttcgcagcttcgcacaag  
ccatatttcttaggttttaaaaaa--tgcagcggacactttttaat-----

tgatggactctgatttgctttttgttgtgcaggcacaagcgcttctgagctacttccgcagccaaagacatgggaattca  
gcaaggagatagccttctgtttttt-cccgtttttt-----gttg-----

>HP301\_AY108552

agaggggaaggagaatgctgcggtgctgttgcctcagctctgtacaaacagcaacaggttttgcagtatagttcttcaaga  
gggtgcagtgccccctctagtcgcccctttcacagtcaggaacaccgcgggcaagagagaaggttcgcagcttcgcacaag  
ccatatttcttaggttttaaaaaa--tgcagcggacactttttaat-----

tgatggactctgatttgctttttgttgtgcaggcacaagcgcttctgagctacttccgcagccaaagacatgggaattca  
gcaaggagatagccttctgtttttt-cccgtttttt-----gttgtagtgtacattaagcg

>CML247\_AY108552

--

aggggaaggagaatgctgcggtgctgttgcctcagctctgtacaaacagcaacaggttttgcagtatagttcttcaagagg  
gtgcagtgccccctctagtcgcccctttcacagtcaggaacaccgcgggcaagagagaaggttcgcagcttcgcacaagcc  
atatttcttaggttttaaaaaa--tgcagcggacactttttaat-----

tgatggactctgatttgctttttgttgtgcaggcacaagcgcttctgagctacttccgcagccaaagacatgg-  
aattcagcaaggagatagccttctgtttttt-cccgtttttt-----gttghtag-----

>NC350\_AY108552

-

gaggggaaggagaatgctgcggtgctgttgcctcagctctgtacaaacagcaacaggttttgcagtatagttcttcaagag  
gggtgcagtgccccctctagtcgcccctttcacagtcaggaacaccgcgggcaagagagaaggttcgcagcttcgcacaagc  
catatttcttaggttttaaaaaa--tgcagcggacactttttaat-----

tgatggactctgatttgctttttgttgtgcaggcacaagcgcttctgagctacttccgcagccaaagacatgggaattca  
gcaaggagatagccttctgtttttt-cccgtttttt-----gttgtagtgtacattaa---

>Ki3\_AY108552

--

aggggaaggagaatgctgcggtgctgttgcctcagctctgtacaaacagcaacaggttttgcagtatagttcttcaagagg  
gtgcagtgccccctctagtcgcccctttcacagtcaggaacaccgcgggcaagagagaaggttcgcagcttcgcacaagcc  
atatttcttaggttttaaaaaa--tgcagcggacactttttaat-----

tgatggactctgatttgctttttgttgtgcaggcacaagcgcttctgagctacttccgcagccaaagacatgggaattca  
gcaaggagatagccttctgttttttcccgtttttt-----gttgtagtgtacattaagcg

>Ki11\_AY108552

agaggggaaggagaatgctgcggtgctgttgcctcagctctgtacaaacagcaacaggttttgcagtatagttcttcaaga  
gggtgcagtgccccctctagtcgcccctttcacagtcaggaacaccgcgggcaagagagaaggttcgcagcttcgcacaag  
ccatatttcttaggttttaaaaaa--tgcagcggacactttttaat-----

tgatggactctgatttgctttttgttgtgcaggcacaagcgcttctgagctacttccgcagccaaagacatgggaattca  
gcaaggagatagccttctgttttttcccgtttttt-----gttghta-----

>CML322\_AY108552

agaggggaaggagaatgctgcggtgctgttgcctcagctctgtacaaacagcaacaggttttgcagtatagttcttcaaga  
gggtgcagtgccccctctagtcgcccctttcacagtcaggaacaccgcgggcaagagagaaggttcgcagcttcgcacaag  
ccatatttcttaggttttaaaaaa--tgcagcggacactttttaat-----

tgatggactctgatttgcttttggttgtgagcagcacaagcgcttctgagctacttccgcagccaaagacatgg-  
aattcagcaaggagatagccttctgtttttt-cccgctttt-----  
>CML69\_AY108552

-  
gaggggaaggagaatgctgcggtgcttgcgctctgtacaaacagcaacaggttttgagctatagttcttcaagag  
gggtgcagtgccccctctagtcgcccccttcacagtcaggaacaccgcgggcaagagagaaggttcgcagcttcgcacaagc  
catatttcttaggttttaaaaaa--tgcagcggacactttttaat-----  
tgatggactctgatttgcttttggttgtgagcagcacaagcgcttctgagctacttccgcagccaaagacatgggaattca  
gcaaggagatagccttctgttttttcccgctttttt-----gttgtagtg-----  
>Assinboine\_PI213793\_AY108552

-----  
ggctgctgttgccttcagctctgtacaaacagcaacaggttttgagctatagttcttcaagaggggtgcagtgccccctctag  
tcgcccccttcacagtcaggaacaccgcgggcaagagagaaggttcgcagcttcgcacaagccatatttcttaggtttaa  
aaa--tgcagcggacactttttaat-----  
tgatggactctgatttgcttttggttgtgagcagcacaagcgcttctgagctacttccgcagccaaagacatgggaattca  
gcaaggagatagccttctgtttttt-cccgctttttt-----gttgtagtgtacattaagcg  
>Gordo\_CHH 160\_AY108552

agaggggaaggagaatgctgcggtgcttgcgctctgtacaaacagcaacaggttttgagctatagttcttcaaga  
gggtgcagtgccccctctagtcgcccccttcacagtcaggaacaccgcgggcaagagagaaggttcgcagcttcgcacaag  
ccatatttcttaggttttaaaaaa--tgcagcggacactttttaat-----  
tgatggactctgatttgcttttggttgtgagcagcacaagcgcttctgagctacttccgcagccaaagacatgggaattca  
gcaaggagatagccttctgtttttt-cccgctttttt-----gttgtagtgtacattaagcg  
>Guirua\_MAG 450\_AY108552

agaggggaaggagaatgctgcggtgcttgcgctctgtacaaacagcaacaggttttgagctatagttcttcaaga  
gggtgcagtgccccctctagtcgcccccttcacagtcaggaacaccgcgggcaagagagaaggttcgcagcttcgcacaag  
ccatatttcttaggttttaaaaaa--tgcagcggacactttttaat-----  
tgatggactctgatttgcttttggttgtgagcagcacaagcgcttctgagctacttccgcagccaaagacatgggaattca  
gcaaggagatagccttctgtttttt-cccgctttttt-----gttgtagtgtacattaagcg  
>Nal-tel\_YUC 7\_AY108552

agaggggaaggagaatgctgcggtgcttgcgctctgtacaaacagcaacaggttttgagctatagttcttcaaga  
gggtgcagtgccccctctagtcgcccccttcacagtcaggaacaccgcgggcaagagagaaggttcgcagcttcgcacaag  
ccatatttcttaggttttaaaaaa--tgcagcggacactttttaat-----  
tgatggactctgatttgcttttggttgtgagcagcacaagcgcttctgagctacttccgcagccaaagacatgggaattca  
gcaaggagatagccttctgtttttt-cccgctttttt-----gttgtagtgtacattaagcg  
>Pisscotunto\_APC 13\_AY108552

-----  
caaacagcaacaggttttgagctatagttcttcaagaggggtgcagtgccccctctagtcgcccccttcacagtcaggaaca  
ccgcgggcaagagagaaggttcgcagcttcgcacaagccatatttcttaggttttaaaaaa--  
tgcagcggacactttttaat-----  
tgatggactctgatttgcttttggttgtgagcagcacaagcgcttctgagctacttccgcagccaaagacatgggaattca  
gcaaggagatagccttctgtttttt-cccgctttttt-----gttgtagtgtacattaagcg  
>Serrano\_GUA 14\_AY108552

agaggggaaggagaatgctgcggtgcttgcgctctgtacaaacagcaacaggttttgagctatagttcttcaaga  
gggtgcagtgccccctctagtcgcccccttcacagtcaggaacaccgcgggcaagagagaaggttcgcagcttcgcacaag  
ccatatttcttaggttttaaaaaa--tgcagcggacactttttaat-----  
tgatggactctgatttgcttttggttgtgagcagcacaagcgcttctgagctacttccgcagccaaagacatgggaattca  
gcaaggagatagccttctgtttttt-cccgctttttt-----gttgtagtgtacattaagcg  
>Zapalote\_Chico\_OAX 70\_AY108552

agaggggaaggagaatgctgcggtgcttgcgctctgtacaaacagcaacaggttttgagctatagttcttcaaga  
gggtgcagtgccccctctagtcgcccccttcacagtcaggaacaccgcgggcaagagagaaggttcgcagcttcgcacaag  
ccatatttcttaggttttaaaaaa--tgcagcggacactttttaat-----  
tgatggactctgatttgcttttggttgtgagcagcacaagcgcttctgagctacttccgcagccaaagacatgggaattca  
gcaaggagatagccttctgtttttt-cccgctttttt-----gttgtagtgtacattaagcg  
>Bolita\_OAX 68\_AY108552

agaggggaaggagaatgctgcggtgcttgcgctctgtacaaacagcaacaggttttgagctatagttcttcaaga  
gggtgcagtgccccctctagtcgcccccttcacagtcaggaacaccgcgggcaagagagaaggttcgcagcttcgcacaag  
ccatatttcttaggttttaaaaaa--tgcagcggacactttttaat-----

tgatggactctgatttgcttttggttgtgagcagcacaagcgcttctgagctacttccgcagccaaagacatgggaattca  
gcaaggagatagccttctgtttttt-cccgtttttt-----gttgtagtgtagacattaagcg  
>Cateto Sulino\_URG 11\_AY108552  
agaggggaaggagaatgctgcggtgctgttgccttcagctctgtacaaacagcaacaggttttgcagtagatttcttcaaga  
gggtgtagtgccccctctagtcgcccctttcacagtcaggaacaccgcgggcaagagagaaggttgcagcttgcgacaag  
ccatatttcttaggttttaaaaaa--tgcagcgggacacttttttaat-----  
tgatggactctgatttgcttttggttgtgagcagcacaagcgcttctgagctacttccgcagccaaagacatgggaattca  
gcaaggagatagccttctgtttttt-cccgtttttt-----gttgtagtgtagacattaagcg  
>Chalqueno\_MEX 48\_AY108552  
agaggggaaggagaatgctgcggtgctgttgccttcagctctgtacaaacagcaacaggttttgcagtagatttcttcaaga  
gggtgtagtgccccctctagtcgcccctttcacagtcaggaacaccgcgggcaagagagaaggttgcagcttgcgacaag  
ccatatttcttaggttttaaaaaa--tgcagcgggacacttttttaat-----  
tgatggactctgatttgcttttggttgtgagcagcacaagcgcttctgagctacttccgcagccaaagacatgggaattca  
gcaaggagatagccttctgtttttt-cccgtttttt-----gttgtagtgtagacattaagcg  
>Conico\_PUE 32\_AY108552  
agaggggaaggagaatgctgcggtgctgttgccttcagctctgtacaaacagcaacaggttttgcagtagatttcttcaaga  
gggtgtagtgccccctctagtcgcccctttcacagtcaggaacaccgcgggcaagagagaaggttgcagcttgcgacaag  
ccatatttcttaggttttaaaaaa--tgcagcgggacacttttttaat-----  
tgatggactctgatttgcttttggttgtgagcagcacaagcgcttctgagctacttccgcagccaaagacatgggaattca  
gcaaggagatagccttctgtttttt-cccgtttttt-----gttgtagtgtagacattaagcg  
>Costeno\_VEN 453\_AY108552  
agaggggaaggagaatgctgcggtgctgttgccttcagctctgtacaaacagcaacaggttttgcagtagatttcttcaaga  
gggtgtagtgccccctctagtcgcccctttcacagtcaggaacaccgcgggcaagagagaaggttgcagcttgcgacaag  
ccatatttcttaggttttaaaaaa--tgcagcgggacacttttttaat-----  
tgatggactctgatttgcttttggttgtgagcagcacaagcgcttctgagctacttccgcagccaaagacatgggaattca  
gcaaggagatagccttctgtttttt-cccgtttttt-----gttgtagtgtagacattaagcg  
>Cristalino Norteno\_CHI 349\_AY108552  
-----  
tgcggctgctgttgccttcagctctgtacaaacagcaacaggttttgcagtagatttcttcaagaggggtgtagtgccccctc  
tagtcgcccctttcacagtcaggaacaccgcgggcaagagagaaggttgcagcttgcgacaagccatatttcttaggttt  
aaaaaa--tgcagcgggacacttttttaat-----  
tgatggactctgatttgcttttggttgtgagcagcacaagcgcttctgagctacttccgcagccaaagacatgggaattca  
gcaaggagatagccttctgtttttt-cccgtttttt-----gttgtagtgtagacattaagcg  
>Dzit Bacal\_GUA 131\_AY108552  
-----  
ttcagctctgtacaaacagcaacaggttttgcagtagatttcttcaagaggggtgtagtgccccctctagtcgcccctttca  
cagtcaggaacaccgcgggcaagagagaaggttgcagcttgcgacaagccatatttcttaggttttaaaaaa--  
tgcagcgggacacttttttaat-----  
tgatggactctgatttgcttttggttgtgagcagcacaagcgcttctgagctacttccgcagccaaagacatgggaattca  
gcaaggagatagccttctgtttttt-cccgtttttt-----gttgtagtgtagacattaagcg  
>Balsas\_Beadle & Kato Site 4\_AY108552  
agaggggaaggagaatgctgcggtgctgttgccttcagctctgtacaaacagcaacaggttttgcagtagatttcttcaaga  
gggtgtagtgccccctctagtcgcccctttcacagtcaggaacaccgcgggcaagagagaaggttgcagcttgcgacaag  
ccatatttcttaggttttaaaaaa--tgcagcgggacacttttttaat-----  
tgatggactctgatttgcttttggttgtgagcagcacaagcgcttctgagctacttccgcagccaaagacatgggaattca  
gcaaggagatagccttctgtttttt-cccgtttttt-----gttgtagtgtagacattaagcg  
>Balsas\_Kato Site 4\_AY108552  
agaggggaaggagaatgctgcggtgctgttgccttcagctctgtacaaacagcaacaggttttgcagtagatttcttcaaga  
gggtgtagtgccccctctagtcgcccctttcacagtcaggaacaccgcgggcaagagagaaggttgcagcttgcgacaag  
ccatatttcttaggttttaaaaaa--tgcagcgggacacttttttaat-----  
tgatggactctgatttgcttttggttgtgagcagcacaagcgcttctgagctacttccgcagccaaagacatgggaattca  
gcaaggagatagccttctgtttttt-cccgtttttt-----gttgtagtgtagacattaagcg  
>Balsas\_INIFAP JSP y Lo5130\_AY108552  
agaggggaaggagaatgctgcggtgctgttgccttcagctctgtacaaacagcaacaggttttgcagtagatttcttcaaga  
gggtgtagtgccccctctagtcgcccctttcacagtcaggaacaccgcgggcaagagagaaggttgcagcttgcgacaag  
ccatatttcttaggttttaaaaaa--tgcagcgggacacttttttaat-----  
tgatggactctgatttgcttttggttgtgagcagcacaagcgcttctgagctacttccgcagccaaagacatgggaattca



gggtgcagtgccccctctagtcgccctttcacagtcaggaacaccgcgggcaagagagaaggttcgcagcttcgcacaag  
ccatatttcttaggtttaaaaaa--tgcagcgggacactttttaat-----  
tgatggactctgatttgctttttgttgtgcagggcacaagcgcttctgagctacttccgcagccaaagacatgggaattca  
gcaaggagatagccttctgtttttttcccgtttttt-----gttgtagtgtacattaagcg  
>Jalisco\_INIFAP JSG y MAS 264\_AY108552  
agaggggaaggagaatgctgcggctgcgcttgccttcagctctgtacaaacagcaacaggttttgcagtatagttcttcaaga  
gggtgcagtgccccctctagtcgccctttcacagtcaggaacaccgcgggcaagagagaaggttcgcagcttcgcacaag  
ccatatttcttaggtttaaaaaa--tgcagcgggacactttttaat-----  
tgatggactctgatttgctttttgttgtgcagggcacaagcgcttctgagctacttccgcagccaaagacatgggaattca  
gcaaggagatagccttctgtttttt-cccgtttttt-----gttgtagtgtacattaagcg  
>Tripsacum\_WW-2120\_AY108552  
agaggggaaggagaatgctgcggctgccttgccttcagctctgtacaaacagcaacaggttttgcagtatagttcttcaaga  
gggtgcagtgccccctctagtcgccctttcacagtcaggaacaccgcgggcaagagagaaggttcgcagcttggcacaag  
ccatatttcttaggtttagaaaa--  
tgcagcagacactttttaatcaccgctaatactgctgatttgatgaagtctgatttgctatctgttgtgcagggcacaagcgct  
tctgagctacttccgcagccaaagacatgggaattcagcaaggagatagccttctgttttttcttctgtcttttgttgcag  
actttcagtgtagattaagcg

>B73\_AI737881

-

gcacacatggtgcagtggtgcacgcatgaattaaaccatcgccagggcgctctcaatcataggctactgtcccttgccct  
gcccctgggcatggtctcggcgatgcccttggagagggcagaagggcgatagactggatgggtgatcatgggggtgacgccc  
accgcccgtgggcagcaggctgccgtcgcacacgtacaggccctctgcctcccagctctcgcgcgggccatccacggcgcc  
gtccttagggctggaccccatacgcagctgcccatctggtgcgctgagcagtgagagagcccacttgtcaaccctcgagt  
gcatgggccccttctcg

>Oh43\_AI737881

-----

ttgcagtggtgcacgcatgaattaaaccatcgccagggcgctctcaatcataggctactgtcccttgccctgcccctggg  
ccatggtctcggcgatgcccttggagagggcagaagggcgatagactggatgggtgatcatgggggtgacgcccaccgcccgtg  
ggcagcaggctgccgtcgcacacgtacaggccctctgcctcccagctctcgcgcgggccatccacggcgccgtccttagg  
gctggaccccatacgcagctgcccatctggtgcgctgagcagtgagagagcccacttgtcaaccctcgagtgcaggg---

-----

>IL14H\_AI737881

cgcacacatggtgcagtggtgcacgcatgaattaaaccatcgccagggcgctctcaatcataggctactgtcccttgccc  
tgcccctgggcatggtctcggcgatgcccttggagagggcagaagggcgatagactggatgggtgatcatgggggtgacgccc  
caccgcccgtgggcagcaggctgccgtcgcacacgtacaggccctctgcctcccagctctcgcgcgggccatccacggcgcc  
cgtccttagggctggaccccatacgcagctgcccatctggtgcgctgagcagtgagagagcccacttgtcaaccctcgag  
tgcag-----

>Mo17\_AI737881

-----

ttgcagtggtgcacgcatgaattaaaccatcgccagggcgctctcaatcataggctactgtcccttgccctgcccctggg  
ccatggtctcggcgatgcccttggagagggcagaagggcgatagactggatgggtgatcatgggggtgacgcccaccgcccgtg  
ggcagcaggctgccgtcgcacacgtacaggccctctgcctcccagctctcgcgcgggccatccacggcgccgtccttagg  
gctggaccccatacgcagctgcccatctggtgcgctgagcagtgagagagcccacttgtcaaccctcgagtgcagggcc  
ccttctcg

>Ky21\_AI737881

-----

attaaaccatcgccagggcgctctcaatcataggctactgtcccttgccctgcccctgggcatggtctcggcgatgcc  
ttggagagggcagaagggcgatagactggatgggtgatcatgggggtgacgcccaccgcccgtgggcagcaggctgccgtcgc  
cacgtacaggccctctgcctcccagctctcgcgcgggccatccacggcgccgtccttagggctggaccccatacgcagc  
tgcccctctggtgcgctgagcagtgagagagcccacttgtcaaccctcgagtgcag-----

>M37W\_AI737881

cgcacacatggtgcagtggtgcacgcatgaattaaaccatcgccagggcgctctcaatcataggctactgtcccttgccc  
tgcccctgggcatggtctcggcgatgcccttggagagggcagaagggcgatagactggatgggtgatcatgggggtgacgccc  
caccgcccgtgggcagcaggctgccgtcgcacacgtacaggccctctgcctcccagctctcgcgcgggccatccacggcgcc

cgctccttagggctggacccatacgcacagctgcccatctggtgcgctgagcagtgaggagcc-  
acttgtcaaccctcgagtgcattgggccccttctcg  
>HP301\_AI737881

-----  
cagtgttgacgcatgaattaaaccatcgccaggcgctctcaatcataggctactgtcccttgccctgcccctgggcca  
tgggtctggcgatgcccttggagaggcagaaggcgatagactggatggatgatcatgggggttgacgcccaccgcccgtgggc  
agcaggctgcccgtcgcacacgtacaggccctctgcctcccagctctcgccgcccggccatccacggcgcccgtccttagggct  
ggacccatacgcacagctgcccatctggtgcgctgagcagtgaggagcccacttgtcaaccctcgagtgcattgggcccct  
tctcg  
>CML247\_AI737881

-----  
gtgttgacgcatgaattaaaccatcgccaggcgctctcaatcataggctactgtcccttgccctgcccctgggcca  
gtctggcgatgcccttggagaggcagaaggcgatagactggatggatgatcatgggggttgacgcccaccgcccgtgggc  
caggctgcccgtcgcacacgtacaggccctctgcctcccagctctcgccgcccggccatccacggcgcccgtccttagggctgg  
acccatacgcacagctgcccatctggtgcgctgagcagtgaggagcccacttgtcaaccctcgagtgcattgggccccttc  
tc-  
>NC350\_AI737881

cgcacacatggttcagtggttcacgcatgaattaaaccatcgccaggcgctctcaatcataggctactgtcccttgccc  
tgcccctgggccaatgggtctggcgatgcccttggagaggcagaaggcgatagactggatggatgatcatgggggttgacgcc  
caccgcccgtgggcagcaggctgcccgtcgcacacgtacaggccctctgcctcccagctctcgccgcccggccatccacggcg  
cgtccttagggctggacccatacgcacagctgcccatctggtgcgctgagcagtgaggagcccacttgtcaaccctcgag  
tgcattgggccc-----  
>Ki3\_AI737881

cgcacacatggttcagtggttcacgcatgaattaaaccatcgccaggcgctctcaatcataggctactgtcccttgccc  
tgcccctgggccaatgggtctggcgatgcccttggagaggcagaaggcgatagactggatggatgatcatgggggttgacgcc  
caccgcccgtgggcagcaggctgcccgtcgcacacgtacaggccctctgcctcccagctctcgccgcccggccatccacggcg  
cgtccttagggctggacccatacgcacagctgcccatctggtgcgctgagcagtgaggagcccacttgtcaaccctcgag  
tgcattgggccccttctc-  
>Kill1\_AI737881

cgcacacatggttcagtggttcacgcatgaattaaaccatcgccaggcgctctcaatcataggctactgtcccttgccc  
tgcccctgggccaatgggtctggcgatgcccttggagaggcagaaggcgatagactggatggatgatcatgggggttgacgcc  
caccgcccgtgggcagcaggctgcccgtcgcacacgtacaggccctctgcctcccagctctcgccgcccggccatccacggcg  
cgtccttagggctggacccatacgcacagctgcccatctggtgcgctgagcagtgaggagcccacttgtcaaccctcgag  
tgcattgggccccttctc-  
>CML333\_AI737881

cgcacacatggttcagtggttcacgcatgaattaaaccatcgccaggcgctctcaatcataggctactgtcccttgccc  
tgcccctgggccaatgggtctggcgatgcccttggagaggcagaaggcgatagactggatggatgatcatgggggttgacgcc  
caccgcccgtgggcagcaggctgcccgtcgcacacgtacaggccctctgcctcccagctctcgccgcccggccatccacggcg  
cgtccttagggctggacccatacgcacagctgcccatctggtgcgctgagcagtgaggagcccacttgtcaaccctcgag  
tgcattgggccccttctc-  
>CML322\_AI737881

cgcacacatggttcagtggttcacgcatgaattaaaccatcgccaggcgctctcaatcataggctactgtcccttgccc  
tgcccctgggccaatgggtctggcgatgcccttggagaggcagaaggcgatagactggatggatgatcatgggggttgacgcc  
caccgcccgtgggcagcaggctgcccgtcgcacacgtacaggccctctgcctcccagctctcgccgcccggccatccacggcg  
cgtccttagggctggacccatacgcacagctgcccatctggtgcgctgagcagtgaggagcccacttgtcaaccctcgag  
tgcattgggccc-----  
>CML69\_AI737881

---  
acacatggttcagtggttcacgcatgaattaaaccatcgccaggcgctctcaatcataggctactgtcccttgccctg  
ccctgggccaatgggtctggcgatgcccttggagaggcagaaggcgatagactggatggatgatcatgggggttgacgccc  
cgcccgtgggcagcaggctgcccgtcgcacacgtacaggccctctgcctcccagctctcgccgcccggccatccacggcg  
ccttagggctggacccatacgcacagctgcccatctggtgcgctgagcagtgaggagcccacttgtcaaccctcgagtgc  
atgggccccttct--  
>Assinboine\_PI213793\_AI737881

cgcacacatggttcagtggttcacgcatgaattaaaccatcgccaggcgctctcaatcataggctactgtcccttgccc  
tgcccctgggccaatgggtctggcgatgcccttggagaggcagaaggcgatagactggatggatgatcatgggggttgacgcc  
caccgcccgtgggcagcaggctgcccgtcgcacacgtacaggccctctgcctcccagctctcgccgcccggccatccacggcg



cgtccttagggctggaccccatacgacagctgcccatctggtgcgctgagcagtgaggagcccacttgtcaaccctcgag  
tgcattgggcccccttctcg  
>Gordo\_CHH 160\_AI737881  
cgcacaca-----tggtgcacgcatgaattaaacca-----  
gcgctctcaatcataggctactgtcccttgccctgcctctggaccatgggtctcggcgatgcccttggagagggcagaagg  
cgatggactggatgggtgatcatgggggtgacgcccaccgccgtgggagcagaggctgccgtcgcacacgtacaggccctct  
gcctcccagctctcgcgcggccatccacggcgccgtccttagggctggaccccatacgacagctgcccatctggtgcgct  
tgagcagtgaggagcccacttgtcaaccctcgagtgcattgggcccccttctcg  
>Guirua\_MAG 450\_AI737881  
cgcacacatggtgcagtggtgcacgcatgaattaaaccatcgccaggcgctctcaatcataggctactgtcccttgccc  
tgcccctgggcccattgggtctcggcgatgcccttggagagggcagaaggcgatagactggatgggtgatcatgggggtgacgccc  
caccgcccgtgggagcagaggctgccgtcgcacacgtacaggccctctgcctcccagctctcgcgcggccatccacggcg  
cgtccttagggctggaccccatacgacagctgcccatctggtgcgctgagcagtgaggagcccacttgtcaaccctcgag  
tgcattgggcccccttctcg  
>Nal-tel\_YUC 7\_AI737881  
cgcacacatggtgcagtggtgcacgcatgaattaaaccatcgccaggcgctctcaatcataggctactgtcccttgccc  
tgcccctgggcccattgggtctcggcgatgcccttggagagggcagaaggcgatagactggatgggtgatcatgggggtgacgccc  
caccgcccgtgggagcagaggctgccgtcgcacacgtacaggccctctgcctcccagctctcgcgcggccatccacggcg  
cgtccttagggctggaccccatacgacagctgcccatctggtgcgctgagcagtgaggagcccacttgtcaaccctcgag  
tgcattgggcccccttctcg  
>Pisscotunto\_APC 13\_AI737881  
cgcacacatggtgcagtggtgcacgcatgaattaaaccatcgccaggcgctctcaatcataggctactgtcccttgccc  
tgcccctgggcccattgggtctcggcgatgcccttggagagggcagaaggcgatagactggatgggtgatcatgggggtgacgccc  
caccgcccgtgggagcagaggctgccgtcgcacacgtacaggccctctgcctcccagctctcgcgcggccatccacggcg  
cgtccttagggctggaccccatacgacagctgcccatctggtgcgctgagcagtgaggagcccacttgtcaaccctcgag  
tgcattgggcccccttctcg  
>Sabanero\_SAN 329\_AI737881  
cgcacacatggtgcagtggtgcacgcatgaattaaaccatcgccaggcgctctcaatcataggctactgtcccttgccc  
tgcccctgggcccattgggtctcggcgatgcccttggagagggcagaaggcgatagactggatgggtgatcatgggggtgacgccc  
caccgcccgtgggagcagaggctgccgtcgcacacgtacaggccctctgcctcccagctctcgcgcggccatccacggcg  
cgtccttagggctggaccccatacgacagctgcccatctggtgcgctgagcagtgaggagcccacttgtcaaccctcgag  
tgcattgggcccccttctcg  
>Serrano\_GUA 14\_AI737881  
cgcacacatggtgcagtggtgcacgcatgaattaaaccatcgccaggcgctctcaatcataggctactgtcccttgccc  
tgcccctgggcccattgggtctcggcgatgcccttggagagggcagaaggcgatagactggatgggtgatcatgggggtgacgccc  
caccgcccgtgggagcagaggctgccgtcgcacacgtacaggccctctgcctcccagctctcgcgcggccatccacggcg  
cgtccttagggctggaccccatacgacagctgcccatctggtgcgctgagcagtgaggagcccacttgtcaaccctcgag  
tgcattgggcccccttctcg  
>Zapalote Chico\_OAX 70\_AI737881  
cgcacacatggtgcagtggtgcacgcatgaattaaaccatcgccaggcgctctcaatcataggctactgtcccttgccc  
tgcccctgggcccattgggtctcggcgatgcccttggagagggcagaaggcgatagactggatgggtgatcatgggggtgacgccc  
caccgcccgtgggagcagaggctgccgtcgcacacgtacaggccctctgcctcccagctctcgcgcggccatccacggcg  
cgtccttagggctggaccccatacgacagctgcccatctggtgcgctgagcagtgaggagcccacttgtcaaccctcgag  
tgcattgggcccccttctcg  
>Bolita\_OAX 68\_AI737881  
cgcacacatggtgcagtggtgcacgcatgaattaaaccatcgccaggcgctctcaatcataggctactgtcccttgccc  
tgcccctgggcccattgggtctcggcgatgcccttggagagggcagaaggcgatagactggatgggtgatcatgggggtgacgccc  
caccgcccgtgggagcagaggctgccgtcgcacacgtacaggccctctgcctcccagctctcgcgcggccatccacggcg  
cgtccttagggctggaccccatacgacagctgcccatctggtgcgctgagcagtgaggagcccacttgtcaaccctcgag  
tgcattgggcccccttctcg  
>Cateto Sulino\_URG 11\_AI737881  
cgcacacatggtgcagtggtgcacgcatgaattaaaccatcgccaggcgctctcaatcataggctactgtcccttgccc  
tgcccctgggcccattgggtctcggcgatgcccttggagagggcagaaggcgatagactggatgggtgatcatgggggtgacgccc  
caccgcccgtgggagcagaggctgccgtcgcacacgtacaggccctctgcctcccagctctcgcgcggccatccacggcg  
cgtccttagggctggaccccatacgacagctgcccatctggtgcgctgagcagtgaggagcccacttgtcaaccctcgag  
tgcattgggcccccttctcg  
>Chalqueno\_MEX 48\_AI737881

cgcacacatggtgagtggtgacgcatgaattaaaccatcgccaggcgcgtctcaatcataggctactgtcccttgccc  
tgcccctgggcatggtctcggcgatgcccttggagagggcagaaggcgatagactggatggtgatcatggggttgacgcc  
caccgccgtgggagcaggctgccgtcgcacacgtacaggccctctgcctcccagctctcgccgaggccatccacggcgc  
cgtccttagggctggaccccatacgacagctgcccatctggtgagctgagcagtgagagagcccacttgtcaaccctcgag  
tgcattgggccccttctcg

>Chapalote\_SIN 2\_AI737881

cgcacaca-----tggtgacgcatgaattaaacca-----

gcgcgctcaatcataggctactgtcccttgcccctgcctctggaccatggtctcggcgatgcccttggagagggcagaagg  
cgatggactggatggtgatcatggggttgacgcccaccgccgtgggagcaggctgccgtcgcacacgtacaggccctct  
gcctcccagctctcgccgaggccatccacggcgcgctccttagggctggaccccatacgacagctgcccatctggtgagc  
tgagcagtgagagagcccacttgtcaaccctcgagtgcattgggccccttctcg

>Conico\_PUE 32\_AI737881

cgcacaca-----

tggtgacgcatgaattaaaccatcgaccggcagctctcaatcataggctactgtcccttgcccctgggcatgg  
tctcggcgatgcccttggagagggcagaaggcgatggactggatggtgatcatggggttgacgcccaccgccgtgggagc  
aggctgccgtcgcacacgtacaggccctctgcctcccagctctcgccgaggccatccacggcgcgctccttagggctgga  
ccccatacgacagctgcccatctggtgagctgagcagtgagagagcccacttgtcaaccctcgagtgcattgggccccttct  
cg

>Costeno\_VEN 453\_AI737881

cgcacacatggtgagtggtgacgcatgaattaaaccatcaccaggcgcgtctcaatcataggctactgtcccttgccc  
tgcccctgggcatggtctcggcgatgcccttggagagggcagaaggcgatggactggatggtgatcatggggttgacgcc  
caccgccgtgggagcaggctgccgtcgcacacgtacaggccctcccagctctcgccgaggccatccacggcgc  
cgtccttagggctggaccccatacgacagctgcccatctggtgagctgagcagtgagagagcccacttgtcaaccctcgag  
tgcattgggccccttctcg

>Cristalino Norteno\_CHI 349\_AI737881

cgcacaca-----tggtgacgcatgaattaaacca-----

gcgcgctcaatcataggctactgtcccttgcccctgcctctggaccatggtctcggcgatgcccttggagagggcagaagg  
cgatggactggatggtgatcatggggttgacgcccaccgccgtgggagcaggctgccgtcgcacacgtacaggccctct  
gcctcccagctctcgccgaggccatccacggcgcgctccttagggctggaccccatacgacagctgcccatctggtgagc  
tgagcagtgagagagcccacttgtcaaccctcgagtgcattgggccccttctcg

>Dzit Bacal\_GUA 131\_AI737881

cgcacacatggtgagtggtgacgcatgaattaaaccatcgccaggcgcgtctcaatcataggctactgtcccttgccc  
tgcccctgggcatggtctcggcgatgcccttggagagggcagaaggcgatagactggatggtgatcatggggttgacgcc  
caccgccgtgggagcaggctgccgtcgcacacgtacaggccctctgcctcccagctctcgccgaggccatccacggcgc  
cgtccttagggctggaccccatacgacagctgcccatctggtgagctgagcagtgagagagcccacttgtcaaccctcgag  
tgcattgggccccttctcg

>Jalisco\_Benz 967\_AI737881

cgcacaca-----

tggtgacgcatgaattaaaccatcgccggcgcgtctcaatcataggctactgtcccttgcccctgggcatgg  
tctcggcgatgcccttggagagggcagaaggcgatggactggatggtgatcatggggttgacgcccaccgccgtgggagc  
aggctgccgtcgcacacgtacaggccctctgcctcccagctctcgccgaggccatccacggcgcgctccttagggctgga  
ccccatacgacagctgcccatctggtgagctgagcagtgagagagcccacttgtcaaccctcgagtgcattgggccccttct  
cg

>Balsas\_Beadle & Kato Site 4\_AI737881

-----

gttgacgcatgaattaaaccatcgccaggcgcgtctcaatcataggctactgtcccttgccccttcccctgggcatggt  
ctcggcgatgcccttggagagggcagaaggcgatagactggatggtgatcatggggttgacgcccaccgccgtgggagc  
ggctgccgtcgcacacgtacaggccctctgcctcccagctctcgccgaggccatccacggcgcgctccttagggctggac  
ccccatacgacagctgcccatctggtgagctgagcagtgagagagcccacttgtcaaccctcgagtgcattgggcccct---

-

>Balsas\_Kato Site 4\_AI737881

cgcacacatggtgagtggtgacgcatgaattaaaccatcgccaggcgcgtctcaatcataggctactgtcccttgccc  
tgcccctgggcatggtctcggcgatgcccttggagagggcagaaggcgatagactggatggtgatcatggggttgacgcc  
caccgccgtgggagcaggctgccgtcgcacacgtacaggccctctgcctcccagctctcgccgaggccatccacggcgc  
cgtccttagggctggaccccatacgacagctgcccatctggtgagctgagcagtgagagagcccacttgtcaaccctcgag  
tgcattgggccccttctcg

>Balsas\_INIFAP JSP y Lo5130\_AI737881

cgcacaca-----

tgttgcacgcatgaattaaacccatcgcccggcggtctcaatcataggctactgtcccttgccttgccttggccatgg  
tctcggcgatgcccttggagagggcagaaggcgatggactggatggtgatcatggggttgacgcccaccgcccgtgggcagc  
aggctgccgtcgcacacgtacaggccctctgcctcccagctctcgccgcagccatccacggcgccgtccttagggctgga  
ccccatacgacagctgcccatctggtgcgctgagcagtgagagagcccacttgtcaaccctcgagtgcattgggccccttct  
cg

>Balsas\_INIFAP JSG y LOS 119\_AI737881

cgcacaca-----

tgttgcacgcatgaattaaacccatcgcccggcggtctcaatcataggctactgtcccttgccttgccttggccatgg  
tctcggcgatgcccttggagagggcagaaggcgatggactggatggtgatcatggggttgacgcccaccgcccgtgggcagc  
aggctgccgtcgcacacgtacaggccctctgcctcccagctctcgccgcggccatccacggcgccgtccttagggctgga  
ccccatacgacagctgcccatctggtgcgctgagcagtgagagagcccacttgtcaaccctcgagtgcattgggccccttct  
cg

>Jalisco\_INIFAP JSG y MAS 401\_AI737881

cgcacaca-----

tgttgcacgcatgaattaaacccatcgcccggcggtctcaatcataggctactgtcccttgccttgccttggccatgg  
tctcggcgatgcccttggagagggcagaaggcgatggactggatggtgatcatggggttgacgcccaccgcccgtgggcagc  
aggctgccgtcgcacacgtacaggccctctgcctcccagctctcgccgcggccatccacggcgccgtccttagggctgga  
ccccatacgacagctgcccatctggtgcgctgagcagtgagagagcccacttgtcaaccctcgagtgcattgggccccttct  
cg

>Balsas\_CIMMYT 8783\_AI737881

cgcacaca-----

tgttgcacgcatgaattaaacccatcgcccggcggtctcaatcataggctactgtcccttgccttgccttggccatgg  
tctcggcgatgcccttggagagggcagaaggcgatggactggatggtgatcatggggttgacgcccaccgcccgtgggcagc  
aggctgccgtcgcacacgtacaggccctctgcctcccagctctcgccgcagccatccacggcgccgtccttagggctgga  
ccccatacgacagctgcccatctggtgcgctgagcagtgagagagcccacttgtcaaccctcgagtgcattgggccccttct  
cg

>Oaxaca\_INIFAP JSG 197\_AI737881

cgcacaca-----

tgttgcacgcatgaattaaacccatcgaccggcagctctcaatcataggctactgtcccttgccttgccttggccatgg  
tctcggcgatgcccttggagagggcagaaggcgatggactggatggtgatcatggggttgacgcccaccgcccgtgggcagc  
aggctgccgtcgcacacgtacaggccctctgcctcccagctctcgccgcggccatccacggcgccgtccttagggctgga  
ccccatacgacagctgcccatctggtgcgctgagcagtgagagagcccacttgtcaaccctcgagtgcattgggccccttct  
cg

>Balsas\_INIFAP JSG y LOS 109\_AI737881

-----

gtgttgcacgcatgaattaaacccatcgcccggcggtctcaatcataggctactgtcccttgccttgccttggccatgg  
gtctcggcgatgcccttggagagggcagaaggcgatggactggatggtgatcatggggttgacgcccaccgcccgtgggcag  
caggctgccgtcgcacacgtacaggccctctgcctcccagctctcgccgcggccatccacggcgccgtccttagggctgg  
acccatacgacagctgcccatctggtgcgctgagcagtgagagagcccacttgtcaaccctcgagtgc-----  
---

>Balsas\_INIFAP JSG 378\_AI737881

cgcacacatggttcagtggttgcacgcatgaattaaacccatcaccaggcggtctcaatcataggctactgtcccttgcct  
tgccttggccatgggtctcggcgatgcccttggagagggcagaaggcgatggactggatggtgatcatggggttgacgcc  
caccgcccgtgggcagcaggctgccgtcgcacacgtacaggccctctgcctcccagctctcgccgcggccatccacggcg  
cgtccttagggctggacccatacgacagctgcccatctggtgcgctgagcagtgagagagcccacttgtcaaccctcgag  
tgcattgggccccttctcg

>Balsas\_INIFAP JSG 374\_AI737881

cgcacacatggttcagtggttgcacgcatgaattaaacccatcgccaggcggtctcaatcataggctactgtcccttgcct  
tgccttggccatgggtctcggccatgcccttggagagggcagaaggcgatagactggatggtgatcatggggttgacgcc  
caccgcccgtgggcagcaggctgccgtcgcacacgtacaggccctctgcctcccagctctcgccgcggccatccacggcg  
cgtccttagggctggacccatacgacagctgcccatctggtgcgctgagcagtgagagagcccacttgtcaaccctcgag  
tgcattgggccccttctcg

>Balsas\_INIFAP JSG y LOS 161\_AI737881

cgcacaca-----

tgttgcacgcatgaattaaacccattgcccggcggtctcaatcataggctactgtcgcttgccttgccttggccatgg  
tctcggcgatgcccttggagagggcagaaggcgatggactggatggtgatcatggggttgacgcccaccgcccgtgggcagc

aggctgccgtcgcacacgtacaggccctctgcctcccagctctcgccgcgcccatccacggcgccgtccttagggctgga  
ccccatacgacagctgcccatctggtgcgctgagcagtgaggagcccacttgtcaaccctcgagtgcattgggccccttct  
cg

>Balsas\_CIMMYT\_11355\_AI737881

cgcacaca-----

tgttgacgcgatgaattaaacatcgcccggcggtctcaatcataggctactgtcccttgccctgcccctgggcatgg  
tctcggcgatgcccttgagagggcagaaggcgatggactggatggtgatcatggggttgacgcccaccgcccgtgggcagc  
aggctgccgtcgcacacgtacaggccctctgcctcccagctctcgccgagccatccacggcgccgtccttagggctgga  
ccccatacgacagctgcccatctggtgcgctgagcagtgaggagcccacttgtcaaccctcgagtgcattgggccccttct  
cg

>Jalisco\_INIFAP\_JSG\_y\_MAS\_264\_AI737881

cgcgaca-----

tgttgacgcgatgaattaaacatcgcccggcggtctcaatcataggctactgtcgcttgccctgcccctgggcatgg  
tctcggcgatgcccttgagagggcagaaggcgatggactggatggtgatcatggggttgacgcccaccgcccgtgggcagc  
aggctgccgtcgcacacgtacaggccctctgcctcccagctctcgccgagccatccacggcgccgtccttagggctgga  
ccccatacgacagctgcccatctggtgcgctgagcagtgaggagcccacttgtcaaccctcgagtgcattgggccccttct  
cg

>Tripsacum\_WW-2120\_\_AI737881

cgcataca-----

tgttgacacacaagaattaaacatcgcccggcggtctcgatcataggctactgtcccttgccctgcccctgggcccaggg  
tctcggcgatgcccttgagagggcagaaggcgatggactgtatagtgatcatggggttgacgcccaccgcccgtgggcagc  
aggctgccgtcgcacacgtacaggccctccgcctcccagctctcgccgagccatccacggcgccgtccttagagctgga  
ccccatacgagagctgcccatctggtgcgctgagcaatggagagcccacttgtcagccctcgagtgcattgggccccttct  
cg

>B73\_AY108194

ggccacaggagaggtcatat----

catcgagaggttgacggcactaccctcatccctcacctgtatagaaaggcaatcggggccaatagtggtagcatgtgaat  
attccaggatttgctgccattcagaaagtcaagttgcagcaactgcatgcctccatggtagcatgaagacacgcccgtag  
agtggctttgtatagaggtgctataggcgaggtggacaaccctttcggatatacgacatggcaagatatttacattgaca  
tttt-----

>Oh43\_AY108194

-----agaggtcatat----

catcgagaggttgacggcactaccctcatccctcacctgtatagaaaggcaatcggggccaatagtggtagcatgtgaat  
attccaggatttgctgccattcagaaagtcaagttgcagcaactgcatgcctccatggtagcatgaagacacgcccgtag  
agtggctttgtatagaggtgctataggcgaggtggacaaccctttcggatatacgacatggcaagatatttacattgaca  
ttttgtatgca-----

>IL14H\_AY108194

-----caggagaggtcatat----

catcgagaggttgacggcactaccctcatccctcacctgtatagaaaggcaatcggggccaatagtggtagcatgtgaat  
attccaggatttgctgccattcagaaagtcaagttgcagcaactgcatgcctccatggtagcatgaagacacgcccgtag  
agtggctttgtatagaggtgctataggcgaggtggacaaccctttcggatatacgacatggcaagatatttacattgaca  
tttt-----

>Mo17\_AY108194

ggccacaggagaggtcatat----

catcgagaggttgacggcactaccctcatccctcacctgtatagaaaggcaatcggggccaatagtggtagcatgtgaat  
attccaggatttgctgccattcagaaagtcaagttgcagcaactgcatgcctccatggtagcatgaagacacgcccgtag  
agtggctttgtatagaggtgctataggcgaggtggacaaccctttcggatatacgacatggcaagatatttacattgaca  
ttttgtatgacccc-----

>Ky21\_AY108194

-----ggagaggtcatat----

catcgagaggttgacggcactaccctcatccctcacctgtatagaaaggcaatcggggccaatagtggtagcatgtgaat  
attccaggatttgctgccattcagaaagtcaagttgcagcaactgcatgcctccatggtagcatgaagacacgcccgtag  
agtggctttgtatagaggtgctataggcgaggtggacaaccctttcggatatacgacatggcaagatatttacattgaca  
ttttgtatgacccgatag

>M37W\_AY108194

-----aggtcatat----

catcgagaggttgacggcactaccctcatccctcacctgtatagaaaggcaatcggggccaatagtggtagcatgtgaat  
atccaggatttgctgccattcagaaagtcaagttgcagcaactgcatgcctccatggtagcatgaagacacgcccgtag  
agtggctttgtatagaggtgctatagggcaggtggacaaccctttcgggatatcgcacatggcaagatattacattgaca  
ttttgtatgcacccgatatg

>HP301\_AY108194

-gccacaggagaggtcatat----

catcgagaggttgacggcactaccctcatccctcacctgtatagaaaggcaatcggggccaatagtggtagcatgtgaat  
atccaggatttgctgccattcagaaagtcaagttgcagcaactgcatgcctccatggtagcatgaagacacgcccgtag  
agtggctttgtatagaggtgctatagggcaggtggacaaccctttcgggatatcgcacatggcaagatattacattgaca  
ttttgtatgcacccgatatg

>CML247\_AY108194

-----ggagaggtcatat----

catcgagaggttgacggcactaccctcatccctcacctgtatagaaaggcaatcggggccaatagtggtagcatgtgaat  
atccaggatttgctgccattcagaaagtcaagttgcagcaactgcatgcctccatggtagcatgaagacacgcccgtag  
agtggctttgtatagaggtgctatagggcaggtggacaaccctttcgggatatcgcacatggcaagatattacattgaca  
ttttgtatgcacccgatatg

>NC350\_AY108194

-----agaggtcatat----

catcgagaggttgacggcactaccctcatccctcacctgtatagaaaggcaatcggggccaatagtggtagcatgtgaat  
atccaggatttgctgccattcagaaagtcaagttgcagcaactgcatgcctccatggtagcatgaagacacgcccgtag  
agtggctttgtatagaggtgctatagggcaggtggacaaccctttcgggatatcgcacatggcaagatattacattgaca  
tttt-----

>Kill\_AY108194

ggccacaggagaggtcatat----

catcgagaggttgacggcactaccctcatccctcacctgtatagaaaggcaatcggggccaatagtggtagcatgtgaat  
atccaggatttgctgccattcagaaagtcaagttgcagcaactgcatgcctccatggtagcatgaagacacgcccgtag  
agtggctttgtatagaggtgctatagggcaggtggacaaccctttcgggatatcgcacatggcaagatattacattgaca  
tttt-----

>CML333\_AY108194

----acaggagaggtcatat----

catcgagaggttgacggcactaccctcatccctcacctgtatagaaaggcaatcggggccaatagtggtagcatgtgaat  
atccaggatttgctgccattcagaaagtcaagttgcagcaactgcatgcctccatggtagcatgaagacacgcccgtag  
agtggctttgtatagaggtgctatagggcaggtggacaaccctttcgggatatcgcacatggcaagatattacattgaca  
tttt-----

>CML322\_AY108194

-----caggagaggtcatat----

catcgagaggttgacggcactaccctcatccctcacctgtatagaaaggcaatcggggccaatagtggtagcatgtgaat  
atccaggatttgctgccattcagaaagtcaagttgcagcaactgcatgcctccatggtagcatgaagacacgcccgtag  
agtggctttgtatagaggtgctatagggcaggtggacaaccctttcgggatatcgcacatggcaagatattacattgaca  
ttttgtatgca-----

>CML69\_AY108194

ggccacaggagaggtcatat----

catcgagaggttgacggcactaccctcatccctcacctgtatagaaaggcaatcggggccaatagtggtagcatgtgaat  
atccaggatttgctgccattcagaaagtcaagttgcagcaactgcatgcctccatggtagcatgaagacacgcccgtag  
agtggctttgtatagaggtgctatagggcaggtggacaaccctttcgggatatcgcacatggcaagatattacattgaca  
tttt-----

>Assinboine\_PI213793\_AY108194

ggccacaggagaggtcatat----

catcgagaggttgacggcactaccctcatccctcacctgtatagaaaggcaatcggggccaatagtggtagcatgtgaat  
atccaggatttgctgccattcagaaagtcaagttgcagcaactgcatgcctccatggtagcatgaagacacgcccgtag  
agtggctttgtatagaggtgctatagggcaggtggacaaccctttcgggatatcgcacatggcaagatattacattgaca  
ttttgtatgcacccgatatg

>Nal-tel\_YUC 7\_AY108194

-----agagaggtcatat----

catcgagaggttgacggcactaccctcatccctcacctgtatagaaaggcaatcggggccaatagtggtagcatgtgaat

attccaggatttgctgccattcagaaagtcaagttgcagcaactgcatgcctccatgggtaccatgaagacacgcccgtag  
agtggtcttggatagaggtgctatagggcaggtggacaaccctttcgggatatcgcacatggcaagatatttacattgaca  
ttttgatgcacccgatatg

>Sabanero\_SAN 329\_AY108194

ggccacaggagaggtcatat----

catcgagaggttgacggcactaccctcatccctcacctgtatagaaaggcaatcggggccaatagtgggtacgatgtgaat  
attccaggatttgctgccattcagaaagtcaagttgcagcaactgcatgcctccatgggtaccatgaagacacgcccgtag  
agtggtcttggatagaggtgctatagggcaggtggacaaccctttcgggatatcgcacatggcaagatatttacattgaca  
ttttgatgcacccgatatg

>Serrano\_GUA 14\_AY108194

ggccacaggagaggtcatat----

catcgagaggttgacggcactaccctcatccctcacctgtatagaaaggcaatcggggccaatagtgggtacgatgtgaat  
attccaggatttgctgccattcagaaagtcaagttgcagcaactgcatgcctccatgggtaccatgaagacacgcccgtag  
agtggtcttggatagaggtgctatagggcaggtggacaaccctttcgggatatcgcacatggcaagatatttacattgaca  
ttttgatgcacccgatatg

>Zapalote Chico\_OAX 70\_AY108194

ggccacaggagaggtcatat----

catcgagaggttgacggcactaccctcatccctcacctgtatagaaaggcaatcggggccaatagtgggtacgatgtgaat  
attccaggatttgctgccattcagaaagtcaagttgcagcaactgcatgcctccatgggtaccatgaagacacgcccgtag  
agtggtcttggatagaggtgctatagggcaggtggacaaccctttcgggatatcgcacatggcaagatatttacattgaca  
ttttgatgcacccgatatg

>Cateto Sulino\_URG 11\_AY108194

ggccacaggagaggtcatat----

catcgagaggttgacggcactaccctcatccctcacctgtatagaaaggcaatcggggccaatagtgggtacgatgtgaat  
attccaggatttgctgccattcagaaagtcaagttgcagcaactgcatgcctccatgggtaccatgaagacacgcccgtag  
agtggtcttggatagaggtgctatagggcaggtggacaaccctttcgggatatcgcacatggcaagatatttacattgaca  
ttttgatgcacccgatatg

>Chapalote\_SIN 2\_AY108194

ggccacaggagaggtcatat----

catcgagaggttgacggcactaccctcatccctcacctgtatagaaaggcaatcggggccaatagtgggtacgatgtgaat  
attccaggatttgctgccattcagaaagtcaagttgcagcaactgcatgcctccatgggtaccatgaagacacgcccgtag  
agtggtcttggatagaggtgctatagggcaggtggacaaccctttcgggatatcgcacatggcaagatatttacattgaca  
ttttgatgcacccgatatg

>Costeno\_VEN 453\_AY108194

----acaggagaggtcatat----

catcgagaggttgacggcactaccctcatccctcacctgtatagaaaggcaatcggggccaatagtgggtacgatgtgaat  
attccaggatttgctgccattcagaaagtcaagttgcagcaactgcatgcctccatgggtaccatgaagacacgcccgtag  
agtggtcttggatagaggtgctatagggcaggtggacaaccctttcgggatatcgcacatggcaagatatttacattgaca  
ttttgatgcacccgatatg

>Cristalino Norteno\_CHI 349\_AY108194

ggccacaggagaggtcatat----

catcgagaggttgacggcactaccctcatccctcacctgtatagaaagacaatcggggccaatagtgggtacgatgtgaat  
attccaggatttgctgccattcagaaagtcaagttgcagcaactgcatgcctccatgggtaccatgaagacacgcccgtag  
agtggtcttggatagaggtgctatagggcaggtggacaaccctttcgggatatcgcacatggcaagatatttacattgaca  
ttttgatgcacccgatatg

>Dzit Bacal\_GUA 131\_AY108194

ggccacaggagaggtcatat----

catcgagaggttgacggcactaccctcatccctcacctgtatagaaaggcaatcggggccaatagtgggtacgatgtgaat  
attccaggatttgctgccattcagaaagtcaagttgcagcaactgcatgcctccatgggtaccatgaagacacgcccgtag  
agtggtcttggatagaggtgctatagggcaggtggacaaccctttcgggatatcgcacatggcaagatatttacattgaca  
ttttgatgcacccgatatg

>Jalisco\_Benz 967\_AY108194

ggccacaggagaggtcatat----

catcgagaggttgacggcactaccctcatccttcacctgtatagaaaggcaatcggggccaatagtgggtacgatgtgaat  
attccaggatttgctgccattcagaaagtcaagttgcagcaactgcatgcctccatgggtaccatgaagacacgcccgtag  
agtggtcttggatagaggtgctatagggcaggtggacaaccctttcgggatatcgcacatggcaagatatttacattgaca  
ttttgatgcacccgatatg

>Balsas\_Beadle & Kato Site 4\_AY108194

ggccacaggagaggtcatat----

catcgagaggttgacggcactaccctcatccctcacctgtatagaaaggcaatcggggccaatagtgggtacgatgtgaat  
attccaggatttgctgccattcagaaagtcaagttgcagcaactgcatgctccatgggtacatgaagacacgcccgtag  
agtggccttggatagaggtgctatagggcaggtggacaaccctttcgggatatcgcacatggcaagatatttacattgaca  
ttttgtatgcacccgatatg

>Balsas\_Kato Site 4\_AY108194

ggccacaggagaggtcatat----

catcgagaggttgacggcactaccctcatccctcacctgtatagaaaggcaatcggggccaatagtgggtacgatgtgaat  
attccaggatttgctgccattcagaaagtcaagttgcagcaactgcatgctccatgggtacatgaagacacgcccgtag  
agtggccttggatagaggtgctatagggcaggtggacaaccctttcgggatatcgcacatggcaagatatttacattgaca  
ttttgtatgcacccgatatg

>Balsas\_Wilkes Site 6\_AY108194

ggccacaggagaggtcatat----

catcgagaggttgacggcactaccctcatccctcacctgtatagaaaggcaatcggggccaatagtgggtacgatgtgaat  
attccaggatttgctgccattcagaaagtcaagttgcagcaactgcatgctccatgggtacatgaagacacgcccgtag  
agtggccttggatagaggtgctatagggcaggtggacaaccctttcgggatatcgcacatggcaagatatttacattgaca  
ttttgtatgcacccgatatg

>Balsas\_INIFAP JSP y Lo5130\_AY108194

ggccacaggagaggtcatat----

catcgagaggttgacggcactaccctcatccctcacctgtatagaaaggcaatcggggccaatagtgggtacgatgtgaat  
attccaggatttgctgccattcagaaagtcaagttgcagcaactgcatgctccatgggtacatgaagacacgcccgtag  
agtggccttggatagaggtgctatagggcaggtggacaaccctttcgggatatcgcacatggcaagatatttacattgaca  
ttttgtatgcacccgatatg

>Balsas\_INIFAP JSG y LOS 119\_AY108194

ggccacaggagaggtcatat----

catcgagaggttgacggcactaccctcatccctcacctgtatagaaaggcaatcggggccaatagtgggtacgatgtgaat  
attccaggatttgctgccattcagaaagtcaagttgcagcaactgcatgctccatgggtacatgaagacacgcccgtag  
agtggccttggatagaggtgctatagggcaggtggacaaccctttcgggatatcgcacatggcaagatatttacattgaca  
ttttgtatgcacccgatatg

>Jalisco\_INIFAP JSG y MAS 401\_AY108194

ggccacaggagaggtcatat----

catcgagaggttgacggcactaccctcatccctcacctgtatagaaaggcaatcggggccaatagtgggtacgatgtgaat  
attccaggatttgctgccattcagaaagtcaagttgcagcaactgcatgctccatgggtacatgaagacacgcccgtag  
agtggccttggatagaggtgctatagggcaggtggacaaccctttcgggatatcgcacatggcaagatatttacattgaca  
ttttgtatgcacccgatatg

>Balsas\_CIMMYT 8783\_AY108194

ggccacaggagaggtcatat----

catcgagaggttgacggcactaccctcatccctcacctgtatagaaaggcaatcggggccaatagtgggtacgatgtgaat  
attccaggatttgctgccattcagaaagtcaagttgcagcaactgcatgctccatgggtacatgaagacacgcccgtag  
agtggccttggatagaggtgctatagggcaggtggacaaccctttcgggatatcgcacatggcaagatatttacattgaca  
ttttgtatgcacccgatatg

>Oaxaca\_INIFAP JSG 197\_AY108194

ggccacaggagaggtcatat----

catcgagaggttgacggcactaccctcatccctcacctgtatagaaaggcaatcggggccaatagtgggtacgatgtgaat  
attccaggatttgctgccattcagaaagtcaagttgcagcaactgcatgctccatgggtacatgaagacacgcccgtag  
agtggccttggatagaggtgctatagggcaggtggacaaccctttcgggatatcgcacatggcaagatatttacattgaca  
ttttgtatgcacccgatatg

>Balsas\_INIFAP JSG y LOS 109\_AY108194

ggccacaggagaggtcatat----

catcgagaggttgacggcactaccctcatccctcacctgtatagaaaggcaatcggggccaatagtgggtacgatgtgaat  
attccaggatttgctgccattcagaaagtcaagttgcagcaactgcatgctccatgggtacatgaagacacgcccgtag  
agtggccttggatagaggtgctatagggcaggtggacaaccctttcgggatatcgcacatggcaagatatttacattgaca  
ttttgtatgcacccgatatg

>Balsas\_INIFAP JSG 378\_AY108194

ggccacaggagaggtcatat----

catcgagaggttgacggcactaccctcatccctcacctgtatagaaaggcaatcggggccaatagtgggtacgatgtgaat

attccaggatttgctgccattcagaaagtcaagttgcagcaactgcatgcctccatgggtaccatgaagacacgcccgtag  
agtggcctttgtatagaggtgctatagggcgaggtggacaaccctttcggatatcgcacatggcaagatatttacattgaca  
ttttgtatgcacccgatatg

>Balsas\_INIFAP JSG 374\_AY108194

ggccacaggagaggtcatat----

catcgagaggttgacggcactaccctcatccctcacctgtatagaaaggcaatcggggccaatagtgggtacgatgtgaat  
attccaggatttgctgccattcagaaagacaagttgcagcaactgcatgcctccatgggtaccatgaagacacgcccgtag  
agtggcctttgtatagaggtgctatagggcgaggtggacaatcctttcggatatcgcacatggcaagatatttacattgaca  
ttttgtatgcacccgatatg

>Balsas\_INIFAP JSG y LOS 161\_AY108194

ggccacaggagaggtcatat----

catcgagaggttgacggcactaccctcatccctcacctgtatagaaaggcaatcggggccaatagtgggtacgatgtgaat  
attccaggatttgctgccattcagaaagtcaagttgcagcaactgcatgcctccatgggtaccatgaagacacgcccgtag  
agtggcctttgtatagaggtgctatagggcgaggtggacaaccctttcggatatcgcacatggcaagatatttacattgaca  
ttttgtatgcacccgatatg

>Balsas\_CIMMYT 11355\_AY108194

ggccacaggagaggtcatat----

catcgagaggttgacggcactaccctcatccctcacctgtatagaaaggcaatcggggccaatagtgggtacgatgtgaat  
attccaggatttgctgccattcagaaagtcaagttgcagcaactgcatgcctccatgggtaccatgaagacacgcccgtag  
agtggcctttgtatagaggtgctatagggcgaggtggacaaccctttcggatatcgcacatggcaagatatttacattgaca  
ttttgtatgcacccgatatg

>Balsas\_USDA PI566686\_AY108194

ggccacaggagaggtcatat----

catcgagaggttgacggcactaccctcatccctcacctgtatagaaaggcaatcggggccaatagtgggtacgatgtgaat  
attccaggatttgctgccattcagaaagtcaagttgcagcaactgcatgcctccatgggtaccatgaagacacgcccgtag  
agtggcctttgtatagaggtgctatagggcgaggtggacaaccctttcggatatcgcacatggcaagatatttacattgaca  
ttttgtatgcacccgatatg

>Jalisco\_INIFAP JSG y MAS 264\_AY108194

ggccacaggagaggtcatat----

catcgagaggttgacggcactaccctcatccctcacctgtatagaaaggcaatcggggccaatagtgggtacgatgtgaat  
attccaggatttgctgccattcagaaagtcaagttgcagcaactgcatgcctccatgggtaccatgaagacacgcccgtag  
agtggcctttgtatagaggtgctatagggcgaggtggacaaccctttcggatatcgcacatggcaagatatttacattgaca  
ttttgtatgcacccgatatg

>Tripsacum\_WW-2120\_haplotype1\_AY108194

-----

caagagaggtcatattgtgcatcgagaggttgacggcactaccctcacccccacctgtatagaaaggcaatcggggcca  
atagtgggtacgatgtgaatattccaggacttgctgccactcagaaagtcaagttgcagcaattgcatgcctccatgggtac  
catgaagacacgcccgtagagtggcctttgtatagaggtgctataggtgaggtggacaaccctttcggatatcgcacatgg  
caagatatttacattgacattttgtatgcacccgatatg

>Tripsacum\_WW-2120\_haplotype1\_AY108194

-----

caagagaggtcatattgtgcatcgagaggttgacggcactaccctcacccccacctgtatagaaaggcaatcggggcca  
atagtgggtacgatgtgaatattccaggatttgctgccactcagaaagtcaagttgcagcaattgcatgcctccatgggtac  
catgaagacacgcccgtagagtggcctttgtatagaggtgctataggtgaggtggacaaccctttcggatatcgcacatgg  
caagatatttacattgacattttgtatgcacccgatatg

>B73\_AY106702

ggatgcaagatgaccgtttgctcgtcaagcgacgtcatagattgtcatcattcatcgaacttggtgacacaaattggttt  
gcatgaagtgttgcatTTTTTTT-

ggcatggtacttgccctttgtaataagttttcttccatttcgtaactagtTTTTTgtttcttctcctctcctatgtctggtcc  
ata--ctgttctggccttctatgggtcttcggtagaattcattggtaaaaaaccatataagtgatttatgattTTTTTcgt

>Oh43\_AY106702

--

atgcaagatgaccgtttgctcgtcaagcgacgtcatagattgtcatcattcatcgaacttggtgacacaaattggtttgc  
atgaagtgttgcatTTTTTTT--

ggcatggtacttgccctttgtaataagttttcttccatttcgtaactagtTTTTTgtttcttctcctctcctatgtctggtcc



ata--ctgttctggccttctatgggtcttcggtagaattcattggtaaaaaccatatagaagtgtattatgattttttcgt  
>IL14H\_AY106702  
ggatgcaagatgaccggttgctcgtcaagcgacgcatagattgtcatcattcatcgaacttggtgacacaaattgggtt  
gcatgaagtgttgcatTTTTTTT-  
ggcatgggtacttgcccttgaataaagttttctccatttcgtaactagttttgtttcttcctc--  
ctatgtctgggtccata--  
ctgttctggccttctatgggtcttcggtagaattcattggtaaaaaccatatagaagtgtattatgattttttcgt  
>Mo17\_AY106702  
ggatgcaagatgaccggttgctcgtcaagcgacgcatagattgtcatcattcatcgaacttggtgacacaaattgggtt  
gcatgaagtgttgcatTTTTTTT-  
ggcatgggtacttgcccttgaataaagttttctccatttcgtaactagttttgtttcttcctcctatgtctgggtcc  
ata--ctgttctggccttctatgggtcttcggtagaattcattggtaaaaaccatatagaagtgtattatgattttttcgt-  
>Ky21\_AY106702  
ggatgcaagatgaccggttgctcgtcaagcgacgcatagattgtcatcattcatcgaacttggtgacacaaattgggtt  
gcatgaagtgttgcatTTTTTTT-  
ggcatgggtacttgcccttgaataaagttttctccatttcgtaactagttttgtttcttcctcctatgtctgggtcc  
ata--ctgttctggccttctatgggtcttcggtagaattcattggtaaaaaccatatagaagtgtattatgattttttcgt-  
>M37W\_AY106702  
ggatgcaagatgaccggttgctcgtcaagcgacgcatagattgtcatcattcatcgaacttggtgacacaaattgggtt  
gcatgaagtgttgcatTTTTTTT-  
ggcatgggtacttgcccttgaataaagttttctccatttcgtaactagttttgtttcttcctcctatgtctgggtcc  
ata--ctgttctggccttctatgggtcttcggtagaattcattggtaaaaaccatatagaagtgtattatgattttttcgt-  
>HP301\_AY106702  
-----  
caagatgaccggttgctcgtcaagcgacgcatagattgtcatcattcatcgaacttggtgacacaaattgggttgc  
aagtgttgcatTTTTTTT-  
ggcatgggtacttgcccttgaataaagttttctccatttcgtaactagttttgtttcttcctcctatgtctgggtcc  
ata--ctgttctggccttctatgggtcttcggtagaattcattggtaaaaaccatatagaagtgtattatgattttttcgt-  
>CML247\_AY106702  
-----  
aagatgaccggttgctcgtcaagcgacgcatagattgtcatcattcatcgaacttggtgacacaaattgggttgc  
agtgttgcatTTTTTTT-  
ggcatgggtacttgcccttgaataaagttttctccatttcgtaactagttttgtttcttcctcctatgtctgggtcc  
ata--ctgttctggccttctatgggtcttcggtagaattcattggtaaaaaccatatagaagtgtattatgattttttcgt-  
>NC350\_AY106702  
--  
atgcaagatgaccggttgctcgtcaagcgacgcatagattgtcatcattcatcgaacttggtgacacaaattgggttgc  
atgaagtgttgcatTTTTTTT-  
ggcatgggtacttgcccttgaataaagttttctccatttcgtaactagttttgtttcttcctcctatgtctgggtcc  
ata--ctgttctggccttctatgggtcttcggtagaattcattggtaaaaaccatatagaagtgtattatgattttt----  
>Ki3\_AY106702  
ggatgcaagatgaccggttgctcgtcaagcgacgcatagattgtcatcattcatcgaacttggtgacacaaattgggtt  
gcatgaagtgttgcatTTTTTTT-  
ggcatgggtacttgcccttgaataaagttttctccatttcgtaactagttttgtttcttcctcctatgtctgggtcc  
ata--ctgttctggccttctatgggtcttcggtagaattcattggtaaaaaccatatagaagtgtattatgattttttcgt-  
>Ki11\_AY106702  
-  
gatgcaagatgaccggttgctcgtcaagcgacgcatagattgtcatcattcatcgaacttggtgacacaaattgggttgc  
catgaagtgttgcatTTTTTTT--  
ggcatgggtacttgcccttgaataaagttttctccatttcgtaactagttttgtttcttcctcctatgtctgggtcc  
ata--ctgttctggccttctatgggtcttcggtagaattcattggtaaaaaccatatagaagtgtattatgattttttcgt-  
>CML333\_AY106702  
ggatgcaagatgaccggttgctcgtcaagcgacgcatagattgtcatcattcatcgaacttggtgacacaaattgggtt  
gcatgaagtgttgcatTTTTTTT-  
ggcatgggtacttgcccttgaataaagttttctccatttcgtaactagttttgtttcttcctcctatgtctgggtcc  
ata--ctgttctggccttctatgggtcttcggtagaattcattggtaaaaaccatatagaagtgtattatgattttttcgt-

>CML322\_AY106702

ggatgcaagatgaccggttgctcgtcaagcgacgcatagattgtcatcattcatcgaacttggtgacacaaattgggtt  
gcatgaagtgttgcatTTTTTTT-  
ggcatggtacttgcccttgtaataagTTTTTcttccatttcgtaactagTTTTTgTTTTcttctctcctatgtctgggcc  
ata--ctggtctggccttctatgggtcttcggtagaattcattggtaaaaaccatatagaagtgtattatgattTTTTTcgt

>CML69\_AY106702

-

gatgcaagatgaccggttgctcgtcaagcgacgcatagattgtcatcattcatcgaacttggtgacacaaattgggtt  
catgaagtgttgcatTTTTTTT--  
ggcatggtacttgcccttgtaataagTTTTTcttccatttcgtaactagTTTTTgTTTTcttctctcctatgtctgggcc  
ata--ctggtctggccttctatgggtcttcggtagaattcattggtaaaaaccatatagaagtgtattatgattTTTTTcgt-

>Gordo\_CHH 160\_AY106702

ggatgcaagatgaccggttgctcgtcaagcgacgcatagattgtcatcattcatcgaacttggtgacacaaattgggtt  
gcatgaagtgttgcatTTTTTTT-  
ggcatggtacttgcccttgtaataagTTTTTcttccatttcgtaactagTTTTTgTTTTcttctctcctatgtctgggcc  
ata--ctggtctggccttctatgggtcttcggtagaattcattggtaaaaaccatatagaagtgtattatgattTTTTTcgt

>Guirua\_MAG 450\_AY106702

ggatgcaagatgaccggttgctcgtcaagcgacgcatagattgtcatcattcatcgaacttggtgacacaaattgggtt  
gcatgaagtgttgcatTTTTTTT-  
ggcatggtacttgcccttgtaataagTTTTTcttccatttcgtaactagTTTTTgTTTTcttctctcctatgtctgggcc  
ata--ctggtctggccttctatgggtcttcggtagaattcattggtaaaaaccatatagaagtgtattatgattTTTTTcgt

>Nal-tel\_YUC 7\_AY106702

ggatgcaagatgaccggttgctcgtcaagcgacgcatagattgtcatcattcatcgaacttggtgacacaaattgggtt  
gcatgaagtgttgcatTTTTTTT-  
ggcatggtacttgcccttgtaataagTTTTTcttccatttcgtaactagTTTTTgTTTTcttctctc--  
ctatgtctgggtccata--

ctggtctggccttctatgggtcttcggtagaattcattggtaaaaaccatatagaagtgtattatgattTTTTTcgt

>Pisscotunto\_APC 13\_AY106702

ggatgcaagatgaccggttgctcgtcaagcgacgcatagattgtcatcattcatcgaacttggtgacacaaattgggtt  
gcatgaagtgttgcatTTTTTTT-  
ggcatggtacttgcccttgtaataagTTTTTcttccatttcgtaactagTTTTTgTTTTcttctctc--  
ctatgtctgggtccata--

ctggtctggccttctatgggtcttcggtagaattcattggtaaaaaccatatagaagtgtattatgattTTTTTcgt

>Sabanero\_SAN 329\_AY106702

ggatgcaagatgaccggttgctcgtcaagcgacgcatagattgtcatcattcatcgaacttggtgacacaaattgggtt  
gcatgaagtgttgcatTTTTTTT-  
ggcatggtacttgcccttgtaataagTTTTTcttccatttcgtaactagTTTTTgTTTTcttctctcctatgtctgggcc  
ata--ctggtctggccttctatgggtcttcggtagaattcattggtaaaaaccatatagaagtgtattatgattTTTTTcgt

>Serrano\_GUA 14\_AY106702

ggatgcaagatgaccggttgctcgtcaagcgacgcatagattgtcatcattcatcgaacttggtgacacaaattgggtt  
gcatgaagtgttgcatTTTTTTT-  
ggcatggtacttgcccttgtaataagTTTTTcttccatttcgtaactagTTTTTgTTTTcttctctcctatgtctgggcc  
ata--ctggtctggccttctatgggtcttcggtagaattcattggtaaaaaccatatagaagtgtattatgattTTTTTcgt

>Zapalote Chico\_OAX 70\_AY106702

ggatgcaagatgaccggttgctcgtcaagcgacgcatagattgtcatcattcatcgaacttggtgacacaaattgggtt  
gcatgaagtgttgcatTTTTTTT-  
ggcatggtacttgcccttgtaataagTTTTTcttccatttcgtaactagTTTTTgTTTTcttctctcctatgtctgggcc  
ata--ctggtctggccttctatgggtcttcggtagaattcattggtaaaaaccatatagaagtgtattatgattTTTTTcgt

>Bolita\_OAX 68\_AY106702

ggatgcaagatgaccggttgctcgtcaagcgacgcatagattgtcatcattcatcgaacttggtgacacaaattgggtt  
gcatgaagtgttgcatTTTTTTT-  
ggcatggtacttgcccttgtaataagTTTTTcttccatttcgtaactagTTTTTgTTTTcttctctcctatgtctgggcc  
ata--ctggtctggccttctatgggtcttcggtagaattcattggtaaaaaccatatagaagtgtattatgattTTTTTcgt

>Cateto Sulino\_URG 11\_AY106702

ggatgcaagatgaccggttgctcgtcaagcgacgcatagattgtcatcattcatcgaacttggtgacacaaattgggtt  
gcatgaagtgttgcatTTTTTTT-  
ggcatggtacttgcccttgtaataagTTTTTcttccatttcgtaactagTTTTTgTTTTcttctctcctatgtctgggcc

ata--ctgttctggccttctatgggtcttcggtagaattcattggtaaaaaccatgatgaagtgtattatgattttttcgt  
>Chalqueno\_MEX 48\_AY106702  
ggatgcaagatgaccgtttgctcgtcaagcgacgtcatagattgtcatcattcatcgaacttggtgacacaaaattgggtt  
gcatgaagtgttgcatTTTTTTT-  
ggcatgggtacttgccctttgtaataagttttcttccatttcgtaactagtttttggttcttctc--  
ctatgtctgggtccata--  
ctgttctggccttctatgggtcttcggtagaattcattggtaaaaaccatgatgaagtgtattatgattttttcgt  
>Chapalote\_SIN 2\_AY106702  
ggatgcaagatgaccgtttgctcgtcaagcgacgtcatagattgtcatcattcatcgaacttggtgacacaaaattgggtt  
gcatgaagtgttgcatTTTTTTT-  
ggcatgggtacttgccctttgtaataagttttcttccatttcgtaactagtttttggttcttctcctatgtctgggtcc  
ata--ctgttctggccttctatgggtcttcggtagaattcattggtaaaaaccatgatgaagtgtattatgattttttcgt  
>Conico\_PUE 32\_AY106702  
ggatgcaagatgaccgtttgctcgtcaagcgacgtcatagattgtcatcattcatcgaacttggtgacacaaaattgggtt  
gcatgaagtgttgcatTTTTTTT-  
ggcatgggtacttgccctttgtaataagttttcttccatttcgtaactagtttttggttcttctc--  
ctatgtctgggtccata--  
ctgttctggccttctatgggtcttcggtagaattcattggtaaaaaccatgatgaagtgtattatgattttttcgt  
>Costeno\_VEN 453\_AY106702  
ggatgcaagatgaccgtttgctcgtcaagcgacgtcatagattgtcatcattcatcgaacttggtgacacaaaattgggtt  
gcatgaagtgttgcatTTTTTTT-  
ggcatgggtacttgccctttgtaataagttttcttccatttcgtaactagtttttggttcttctcctatgtctgggtcc  
atatactgttctggccttctatgggtcttcggtagaattcattggtaaaaaccatgatgaagtgtattatgattttttcgt  
>Cristalino Norteno\_CHI 349\_AY106702  
ggatgcaagatgaccgtttgctcgtcaagcgacgtcatagattgtcatcattcatcgaacttggtgacacaaaattgggtt  
gcatgaagtgttgcatTTTTTTT-  
ggcatgggtacttgccctttgtaataagttttcttccatttcgtaactagtttttggttcttctc--  
ctatgtctgggtccata--  
ctgttctggccttctatgggtcttcggtagaattcattggtaaaaaccatgatgaagtgtattatgattttttcgt  
>Dzit Bacal\_GUA 131\_AY106702  
ggatgcaagatgaccgtttgctcgtcaagcgacgtcatagattgtcatcattcatcgaacttggtgacacaaaattgggtt  
gcatgaagtgttgcatTTTTTTT-  
ggcatgggtacttgccctttgtaataagttttcttccatttcgtaactagtttttggttcttctcctatgtctgggtcc  
ata--ctgttctggccttctatgggtcttcggtagaattcattggtaaaaaccatgatgaagtgtattatgattttttcgt  
>Jalisco\_Benz 967\_AY106702  
ggatgcaagatgaccgtttgctcgtcaagcgacgtcatagattgtcatcattcatcgaacttggtgacacaaaattgggtt  
gcatgaagtgttgcatTTTTTTT-  
ggcatgggtacttgccctttgtaataagttttcttccatttcgtaactagtttttggttcttctc--  
ctatgtctgggtccata--  
ctgttctggccttctatgggtcttcggtagaattcattggtaaaaaccatgatgaagtgtattatgattttttcgt  
>Balsas\_Beadle & Kato Site 4\_AY106702  
ggatgcaagatgaccgtttgctcgtcaagcgacgtcatagattgtcatcattcatcgaacttggtgacacaaaattgggtt  
gcatgaagtgttgcatTTTTTTT-  
ggcatgggtacttgccctttgtaataagttttcttccatttcgtaactagtttttggttcttctc--  
ctatgtctgggtccata--  
ctgttctggccttctatgggtcttcggtagaattcattggtaaaaaccatgatgaagtgtattatgattttttcgt  
>Balsas\_Kato Site 4\_AY106702  
ggatgcaagatgaccgtttgctcgtcaagcgacgtcatagattgtcatcattcatcgaacttggtgacacaaaattgggtt  
gcatgaagtgttgcatTTTTTTT-  
ggcatgggtacttgccctttgtaataagttttcttccatttcgtaactagtttttggttcttctc--  
ctatgtctgggtccata--  
ctgttctggccttctatgggtcttcggtagaattcattggtaaaaaccatgatgaagtgtattatgattttttcgt  
>Balsas\_INIFAP JSP y Lo5130\_AY106702  
ggatgcaagatgaccgtttgctcgtcaagcgacgtcatagattgtcatcattcatcgaacttggtgacacaaaattgggtt  
gcatgaagtgttgcatTTTTTTT-  
ggcatgggtacttgccctttgtaataagttttcttccatttcgtaactagtttttggttcttctc--  
ctatgtctgggtccata--

ctgttctggccttctatggtcttcggtagaattcattggtaaaaaccatgatgaagtgtattatgattttttcgt  
>Balsas\_INIFAP JSG y LOS 119\_AY106702  
ggatgcaagatgaccgtttgctcgtcaagcgacgtcatagattgtcatcattcatcgaacttggtgacacaaaattggttt  
gcatgaagtgttgcatTTTTTTT-  
ggcatggtacttgccctttgtaataagttttctccatttcgtaactagtttttgtttcttcctc--  
ctatgtctgggtccata--  
ctgttctggccttctatggtcttcggtagaattcattggtaaaaaccatgatgaagtgtattatgattttttcgt  
>Jalisco\_INIFAP JSG y MAS 401\_AY106702  
ggatgcaagatgaccgtttgctcgtcaagcgacgtcatagattgtcatcattcatcgaacttggtgacacaaaattggttt  
gcatgaagtgttgcatTTTTTTT-  
ggcatggtacttgccctttgtaataagttttctccatttcgtaactagtttttgtttcttcctc--  
ctatgtctgggtccata--  
ctgttctggccttctatggtcttcggtagaattcattggtaaaaaccatgatgaagtgtattatgattttttcgt  
>Balsas\_CIMMYT 8783\_AY106702  
ggatgcaagatgaccgtttgctcgtcaagcgatgtcatagattgtcatcattcatcgaacttggtgacacaaaattggttt  
gcatgaagtgttgcatTTTTTTTggcatggtacttgccctttgtaataagttttctccatttcgtaactagttttgt  
tcttcctctcctatgtctgggtccata--  
ctgttctggccttctatggtcttcggtagaattcattggtaaaaaccatgatgaagtgtattatgattttttcgt  
>Oaxaca\_INIFAP JSG 197\_AY106702  
ggatgcaagatgaccgtttgctcgtcaagcgacgtcatagattgtcatcattcatcgaacttggtgacacaaaattggttt  
gcatgaagtgttgcatTTTTTTT-  
ggcatggtacttgccctttgtaataagttttctccatttcgtaactagtttttgtttcttcctc--  
ctatgtctgggtccata--  
ctgttctggccttctatggtcttcggtagaattcattggtaaaaaccatgatgaagtgtattatgattttttcgt  
>Balsas\_INIFAP JSG y LOS 109\_AY106702  
ggatgcaagatgaccgtttgctcgtcaagcgacgtcatagattgtcatcattcatcgaacttggtgacacaaaattggttt  
gcatgaagtgttgcatTTTTTTT--  
ggcatggtacttgccctttgtaataagttttctccattttgtaactagtttttgtttcttcctctcctatgtctgggtcc  
ata--ctgttctggccttctatggtcttcggtagaattcattggtaaaaaccatgatgaagtgtattatgattttttcgt  
>Balsas\_INIFAP JSG 378\_AY106702  
ggatgcaagatgaccgtttgctcgtcaagcgacgtcatagattgtcatcattcatcgaacttggtgacacaaaattggttt  
gcatgaagtgttgcatTTTTTTT-  
ggcatggtacttgccctttgtaataagttttctccatttcgtaactagtttttgtttcttcctc--  
ctatgtctgggtccata--  
ctgttctggccttctatggtcttcggtagaattcattggtaaaaaccatgatgaagtgtattatgattttttcgt  
>Balsas\_INIFAP JSG 374\_AY106702  
ggatgcaagatgaccgtttgctcgtcaagcgacgtcatagattgtcatcattcatcgaacttggtgacacaaaattggttt  
gcatgaagtgttgcatTTTTTTT--  
ggcatggtacttgccctttgtaataagttttctccatttcgtaactagtttttgtttcttcctctcctatgtctgggtcc  
ata--ctgttctgaccttctatggtcttcggtagaattcattggtaaaaaccatgatgaagtgtattatgattttttcgt  
>Balsas\_INIFAP JSG y LOS 161\_AY106702  
ggatgcaagatgaccgtttgctcgtcaagcgacgtcatagattgtcatcattcatcgaacttggtgacacaaaattggttt  
gcatgaagtgttgcatTTTTTTT-  
ggcatggtacttgccctttgtaataagttttctccatttcgtaactagtttttgtttcttcctc--  
ctatgtctgggtccata--  
ctgttctggccttctatggtcttcggtagaattcattggtaaaaaccatgatgaagtgtattatgattttttcgt  
>Balsas\_CIMMYT 11355\_AY106702  
ggatgcaagatgaccgtttgctcgtcaagcgacgtcatagattgtcatcattcatcgaacttggtgacacaaaattggttt  
gcatgaagtgttgcatTTTTTTT-  
ggcatggtacttgccctttgtaataagttttctccatttcgtaactagtttttgtttcttcctctcctatgtctgggtcc  
ata--ctgttctggccttctatggtcttcggtagaattcattggtaaaaaccatgatgaagtgtattatgattttttcgt  
>Balsas\_USDA PI566686\_AY106702  
ggatgcaagatgaccgtttgctcgtcaagcgacgtcatagattgtcatcattcatcgaacttggtgacacaaaattggttt  
gcatgaagtgttgcatTTTTTTT-  
ggcatggtacttgccctttgtaataagttttctccatttcgtaactagtttttgtttcttcctctcctatgtctgggtcc  
ata--ctgttctggccttctatggtcttcggtagaattcattggtaaaaaccatgatgaagtgtattatgattttttcgt  
>Tripsacum\_WW-2120\_AY106702

gcatgcaagatgaccggttgcctcgtcaagcggcctcatagattgtcatcattcatcgaacttggtgacacagattgggtt  
acatgaagtgttgcaatttttt--ggcatggg----  
gcccttggtaataacttttctccatttagtaatgagttttgtttcctctcc---tacggttggtccata--  
ctggtctggccttctatgggtctcggtagaattcattgggtaaaacatcatcaagtgtattatgatttgggtcgt

>B73\_AY106371

tgcattcacattggttatcagttaaaaagtctatggaacggtaagcatgttaattagtcagtcctgacgctgctgggtgac  
agggtggtaatttaggctctgcatttagctgttttgatggctgctgtcgccgccatacatgatcatcttcttgggttg  
tatggtacctaaccgcgtaaacatgttaaccttaggccatgtattaactactccgctctaattggttgatgtgtattgtc  
aaacttgagaaccagttgcatgcatgaaaaataataagtgtctgggtatc

>Ki11\_AY106371

tgcattcacattggttatcagttaaaaagtctatggaacggtaagcatgttaattagtcagtcctgacgctgctgggtgac  
agggtggtaatttaggctctgcatttagctgttttgatggctgctgtcgccgccatacatgatcatcttcttgggttg  
tatggtacctaaccgcgtaaacatgttaaccttaggccatgtattaactactccgctctaattggttgatgtgtattgtc  
a-----

>HP301\_AY106371

tgcattcacattggttatcagttaaaaagtctatggaacggtaagcatgttaattagtcagtcctgacgctgctgggtgac  
agggtggtaatttaggctctgcatttagctgttttgatggctgctgtcgccgccatacatgatcatcttcttgggttg  
tatggtacctaaccgcgtaaacatgttaaccttaggccatgtattaactactccgctctaattggttgatgtgtattgtc  
aaacttgagaaccagttgcatgcatgaaaaataataagtgtctggg-----

>CML322\_AY106371

tgcattcacattggttatcagttaaaaagtctatggaacggtaagcatgttaattagtcagtcctgacgctgctgggtgac  
agggtggtaatttaggctctgcatttagctgttttgatggctgctgtcgccgccatacatgatcatcttcttgggttg  
tatggtacctaaccgcgtaaacatgttaaccttaggccatgtattaactactccgctctaattggttgatgtgtattgtc  
aaacttgagaaccagttgcatgcatgaaaaataataagtgtctgggt---

>CML247\_AY106371

tgcattcacattggttatcagttaaaaagtctatggaacggtaagcatgttaattagtcagtcctgacgctgctgggtgac  
agggtggtaatttaggctctgcatttagctgttttgatggctgctgtcgccgccatacatgatcatcttcttgggttg  
tatggtacctaaccgcgtaaacatgttaaccttaggccatgtattaactactccgctctaattggttgatgtgtattgtc  
aaacttgagaaccagttgcatgcatgaaaaataataagtgtctgggtat-

>Mo17\_AY106371

tgcattcacattggttatcagttaaaaagtctatggaacggtaagcatgttaattagtcagtcctgacgctgctgggtgac  
agggtggtaatttaggctctgcatttagctgttttgatggctgctgtcgccgccatacatgatcatcttcttgggttg  
tatggtacctaaccgcgtaaacatgttaaccttaggccatgtattaactactccgctctaattggttgatgtgtattgtc  
aaacttgagaaccagttgcatgcatgaaaaataataagtgtctgggtat-

>Oh43\_AY106371

tgcattcacattggttatcagttaaaaagtctatggaacggtaagcatgttaattagtcagtcctgacgctgctgggtgac  
agggtggtaatttaggctctgcatttagctgttttgatggctgctgtcgccgccatacatgatcatcttcttgggttg  
tatggtacctaaccgcgtaaacatgttaaccttaggccatgtattaactactccgctctaattggttgatgtgtattgtc  
aaacttgagaaccagttgcatgcatgaaaaataataagtgtctgggtat-

>Ki3\_AY106371

tgcattcacattggttatcagttaaaaagtctatggaacggtaagcatgttaattagtcagtcctgacgctgctgggtgac  
agggtggtaatttaggctctgcatttagctgttttgatggctgctgtcgccgccatacatgatcatcttcttgggttg  
tatggtacctaaccgcgtaaacatgttaaccttaggccatgtattaactactccgctctaattggttgatgtgtattgtc  
aaacttgagaaccagttgcatgcatgaaaaataataagtgtctgggtat-

>IL14H\_AY106371

tgcattcacattggttatcagttaaaaagtctatggaacggtaagcatgttaattagtcagtcctgacgctgctgggtgac  
agggtggtaatttaggctctgcatttagctgttttgatggctgctgtcgccgccatacatgatcatcttcttgggttg  
tatggtacctaaccgcgtaaacatgttaaccttaggccatgtattaactactccgctctaattggttgatgtgtattgtc  
aaacttgagaaccagttgcatgcatgaaaaataataagtgtctgggtatc

>M37W\_AY106371

tgcattcacattggttatcagttaaaaagtctatggaacggtaagcatgttaattagtcagtcctgacgctgctgggtgac  
agggtggtaatttaggctctgcatttagctgttttgatggctgctgtcgccgccatacatgatcatcttcttgggttg  
tatggtacctaaccgcgtaaacatgttaaccttaggccatgtattaactactccgctctaattggttgatgtgtattgtc  
aaacttgagaaccagttgcatgcatgaaaaataataagtgtctgggtatc

>Ky21\_AY106371

tgcgattcacattggttatcagttaaaaagtctatggaacggtaagcatgttaattagtcagtcctgacgctgctgggtgac  
aggttggtaattaggctctgcatttagctgttttgatggctgctgtcgccgccatacatgatcatcttcttctgtgggtg  
tatggtacctaaccgcgtaaacatgttaaccttaggccatgtattaactccgctctaattggttgatgtgtattgtc  
aaacttgagaaccagttgcatgcatgaaaaataataagtgtctgggtatc

>CML333\_AY106371

----

attcacattggttatcagttaaaaagtctatggaacggtaagcatgttaattagtcagtcctgacgctgctgggtgacaggt  
tggttaattaggctctgcatttagctgttttgatggctgctgtcgccgccatacatgatcatcttcttctgtgggtg  
gtacctaaccgcgtaaacatgttaaccttaggccatgtattaactccgctctaattggttgatgtgtattgtcaaac  
ttgcagaaccagttgcatgcatgaaaaataataagtgtctgg-----

>NC350\_AY106371

----

attcacattggttatcagttaaaaagtctatggaacggtaagcatgttaattagtcagtcctgacgctgctgggtgacaggt  
tggttaattaggctctgcatttagctgttttgatggctgctgtcgccgccatacatgatcatcttcttctgtgggtg  
gtacctaaccgcgtaaacatgttaaccttaggccatgtattaactccgctctaattggttgatgtgtattgtcaaac  
ttgcagaaccagttgcatgcatgaaaaataataagtgtctgggt---

>CML69\_AY106371

-----

tcacattggttatcagttaaaaagtctatggaacggtaagcatgttaattagtcagtcctgacgctgctgggtgacaggtg  
gtaattaggctctgcatttagctgttttgatggctgctgtcgccgccatacatgatcatcttcttctgtgggtg  
acctaaccgcgtaaacatgttaaccttaggccatgtattaactccgctctaattggttgatgtgtattgtcaaact  
gcagaaccagttgcatgcatgaaaaataataagtgtctgggtatc

>Guirua\_MAG 450\_AY106371

tc-----

acattggttatcagttaaaaagtctatggaacggtaagcatgttaattagtcagtcctgacgctgctgggtgacaggttggt  
aattaggctctgcatttagctgttttgatggctgctgtcgccgccatacatgatcatcttcttctgtgggtg  
ctaaccgcgtaaacatgttaaccttaggccatgtattaactccgctctaattggttgatgtgtattgtcaaactg  
agaaccagttgcatgcatgaaaaataataagtgtctgggtatc

>Nal-tel\_YUC 7\_AY106371

tgcgattcacattggttatcagttaaaaagtctatggaacggtaagcatgttaattagtcagtcctgacgctgctgggtgac  
aggttggtaattaggctctgcatttagctgttttgatggctgctgtcgccgccatacatgatcatcttcttctgtgggtg  
tatggtacctaaccgcgtaaacatgttaaccttaggccatgtattaactccgctctaattggttgatgtgtattgtc  
aaacttgagaaccagttgcatgcatgaaaaataataagtgtctgggtatc

>Pisscotunto\_APC 13\_AY106371

tgcgattcacattggttatcagttaaaaagtctatggaacggtaagcatgttaattagtcagtcctgacgctgctgggtgac  
aggttggtaattaggctctgcatttagctgttttgatggctgctgtcgccgccatacatgatcatcttcttctgtgggtg  
tatggtacctaaccgcgtaaacatgttaaccttaggccatgtattaactccgctctaattggttgatgtgtattgtc  
aaacttgagaaccagttgcatgcatgaaaaataataagtgtctgggtatc

>Sabanero\_SAN 329\_AY106371

tgcgattcacattggttatcagttaaaaagtctatggaacggtaagcatgttaattagtcagtcctgacgctgctgggtgac  
aggttggtaattaggctctgcatttagctgttttgatggctgctgtcgccgccatacatgatcatcttcttctgtgggtg  
tatggtacctaaccgcgtaaacatgttaaccttaggccatgtattaactccgctctaattggttgatgtgtattgtc  
aaacttgagaaccagttgcatgcatgaaaaataataagtgtctgggtatc

>Serrano\_GUA 14\_AY106371

tgcgattcacattggttatcagttaaaaagtctatggaacggtaagcatgttaattagtcagtcctgacgctgctgggtgac  
aggttggtaattaggctctgcatttagctgttttgatggctgctgtcgccgccatacatgatcatcttcttctgtgggtg  
tatggtacctaaccgcgtaaacatgttaaccttaggccatgtattaactccgctctaattggttgatgtgtattgtc  
aaacttgagaaccagttgcatgcatgaaaaataataagtgtctgggtatc

>Zapalote Chico\_OAX 70\_AY106371

tgcgattcacattggttatcagttaaaaagtctatggaacggtaagcatgttaattagtcagtcctgacgctgctgggtgac  
aggttggtaattaggctctgcatttagctgttttgatggctgctgtcgccgccatacatgatcatcttcttctgtgggtg  
tatggtacctaaccgcgtaaacatgttaaccttaggccatgtattaactccgctctaattggttgatgtgtattgtc  
aaacttgagaaccagttgcatgcatgaaaaataataagtgtctgggtatc

>Cateto Sulino\_URG 11\_AY106371

tgcgattcacattggttatcagttaaaaagtctatggaacggtaagcatgttaattagtcagtcctgacgctgctgggtgac  
aggttggtaattaggctctgcatttagctgttttgatggctgctgtcgccgccatacatgatcatct---

tgtgggtgtatggtacctaaccgcgtaaacatgttaaccttaggccatgtattaactccgctctaagtgttgtatgt  
gtattgtcaaacttgagaaccagttgcatgcatgaaaaataataagtgtctgggtatc

>Chalqueno\_MEX 48\_AY106371

tgcattcacattggttatcagttaaaaagtctatggaacggtaagcatgttaattagtcagtcctgacgctgctgggtgac  
aggttggtaattaggctctgcatttagctgttttggatggctgctgtcgccgccatacatgtatcatcttcttgggttg  
tatggtacctaaccgcgtaaacatgttaaccttaggccatgtattaactccgctctaagtgttggatgtgtattgtc  
aaacttgagaaccagttgcatgcatgaaaaataataagtgtctgggtatc

>Conico\_PUE 32\_AY106371

tgcattcacattggttatcagttaaaaagtctatggaacggtaagcatgttaattagtcagtcctgacgctgctgggtgac  
aggttggtaattaggctctgcatttagctgttttggatggctgctgtcgccgccatacatgtatcatcttcttgggttg  
tatggtacctaaccgcgtaaacatgttaaccttaggccatgtattaactccgctctaagtgttggatgtgtattgtc  
aaacttgagaaccagttgcatgcatgaaaaataataagtgtctgggtatc

>Costeno\_VEN 453\_AY106371

tgcattcacattggttatcagttaaaaagtctatggaacggtaagcatgttaattagtcagtcctgacgctgctgggtgac  
aggttggtaattaggctctgcatttagctgttttggatggctgctgtcgccgccatacatgtatcatcttcttgggttg  
tatggtacctaaccgcgtaaacatgttaaccttaggccatgtattaactccgctctaagtgttggatgtgtattgtc  
aaacttgagaaccagttgcatgcatgaaaaataataagtgtctgggtatc

>Cristalino Norteno\_CHI 349\_AY106371

tgcattcacattggttatcagttaaaaagtctatggaacggtaagcatgttaattagtcagtcctgacgctgctgggtgac  
aggttggtaattaggctctgcatttagctgttttggatggctgctgtcgccgccatacatgtatcatcttcttgggttg  
tatggtacctaaccgcgtaaacatgttaaccttaggccatgtattaactccgctctaagtgttggatgtgtattgtc  
aaacttgagaaccagttgcatgcatgaaaaataataagtgtctgggtatc

>Dzit Bacal\_GUA 131\_AY106371

tgcattcacattggttatcagttaaaaagtctatggaacggtaagcatgttaattagtcagtcctgacgctgctgggtgac  
aggttggtaattaggctctgcatttagctgttttggatggctgctgtcgccgccatacatgtatcatcttcttgggttg  
tatggtacctaaccgcgtaaacatgttaaccttaggccatgtattaactccgctctaagtgttggatgtgtattgtc  
aaacttgagaaccagttgcatgcatgaaaaataataagtgtctgggtatc

>Jalisco\_Benz 967\_AY106371

tgcattcacattggttatcagttaaaaagtctatggaacggtaagcatgttaattagtcagtcctgacgctgctgggtgac  
aggttggtaattaggctctgcatttagctgttttggatggctgctgtcgccgccatacatgtatcatcttcttgggttg  
tatggtacctaaccgcgtaaacatgttaaccttaggccatgtattaactccgctctaagtgttggatgtgtattgtc  
aaacttgagaactagttgcatgcatgaaaaataataagtgtctgggtatc

>Balsas\_Beadle & Kato Site 4\_AY106371

tcg-----

cattggttatcagttaaaaagtctatggaacggtaagcatgttaattagtcagtcctgacgctgctgggtgacagggttgga  
attaggctctgcatttagctgttttggatggctgctgtcgccgccatacatgtatcatcttcttgggttgatgggtacc  
taaccgcgtaagcatattaaccttaggccatgtattaactctgctctaagtgttggatgtgtattgtcaaacttgca  
gaactagttgcatgcatgaaaaataataagtgtctgggtatc

>Balsas\_Kato Site 4\_AY106371

tgcattcacattggttatcagttaaaaagtctatggaacggtaagcatgttaattagtcagtcctgacgctgctgggtgac  
aggttggtaattaggctctgcatttagctgttttggatggctgctgtcgccgccatacatgtatcatcttcttgggttg  
tatggtacctaaccgcgtaaacatgttaaccttaggccatgtattaactccgctctaagtgttggatgtgtattgtc  
aaacttgagaaccagttgcatgcatgaaaaataataagtgtctgggtatc

>Balsas\_Wilkes Site 6\_AY106371

tgcattcacattggttatcagttaaaaagtctatggaacggtaagcatgttaattagtcagtcctgacgctgctgggtgac  
aggttggtaattaggctctgcatttagctgttttggatggctgctgtcgccgccatacatgtatcatcttcttgggttg  
tatggtacctaaccgcgtaaacatgttaaccttaggccatgtattaactccgctctaagtgttggatgtgtattgtc  
aaacttgagaaccagttgcatgcatgaaaaataataagtgtctgggtatc

>Balsas\_INIFAP JSP y Lo5130\_AY106371

tgcattcacattggttatcagttaaaaagtctatggaacggtaagcatgttaattagtcagtcctgacgctgctgggtgac  
aggttggtaattaggctctgcatttagctgttttggatggctgctgtcgccgccatacatgtatcatcttcttgggttg  
tatggtacctaaccgcgtaaacatgttaaccttaggccatgtattaactccgctctaagtgttggatgtgtattgtc  
aaacttgagaactagttgcatgcatgaaaaataataagtgtctgggtatc

>Balsas\_INIFAP JSG y LOS 119\_AY106371

tcg-----

cattggttatcagttaaaaagtctatggaacggtaagcatgttaattagtcagtcctgacgctgctgggtgacagggttgga  
attaggctctgcatttagctgttttggatggctgctgtcgccgccatacatgtatcatcttcttgggttgatgggtacc

taaccgcgtaagcatattaaccttaggccatgtattaactccgctctaagtgttggatgtgtattgtcaaacttgca  
gaactagttgcatgcatgaaaaataataagtgtctgggtatc  
>Jalisco\_INIFAP JSG y MAS 401\_AY106371  
tcgcattcacattgttatcagttaaaaagtctatggaacggtaagcatgttaattagtcagtcctgacgctgctgggtgac  
aggttggtaattaggctctgcatttagctgttttggatggctgctgtcgccgccatacatgatcatcttcttgggttg  
tatggtacctaaccgcgtaaacatgttaaccttaggccatgtattaactccgctctaagtgttggatgtgtattgtc  
aaacttgagaaccagttgcatgcatgaaaaataataagtgtctgggtatc  
>Balsas\_CIMMYT 8783\_AY106371  
tcgcattcacattgttatcagttaaaaagtctatggaacggtaagcatgttaattagtcagtcctgacgctgctgggtgac  
aggttggtaattaggctctgcatttagctgttttggatggctgctgtcgccgccatacatgatcatcttcttgggttg  
tatggtacctaaccgcgtaaacatgttaaccttaggccatgtattaactccgctctaagtgttggatgtgtattgtc  
aaacttgagaaccagttgcatgcatgaaaaataataagtgtctgggtatc  
>Oaxaca\_INIFAP JSG 197\_AY106371  
tcgcattcacattgttatcagttaaaaagtctatggaacggtaagcatgttaattagtcagtcctgacgctgctgggtgac  
aggttggtaattaggctctgcatttagctgttttggatggctgctgtcgccgccatacatgatcatcttcttgggttg  
tatggtacctaaccgcgtaaacatgttaaccttaggccatgtattaactccgctctaagtgttggatgtgtattgtc  
aaacttgagaaccagttgcatgcatgaaaaataataagtgtctgggtatc  
>Balsas\_INIFAP JSG 378\_AY106371  
tc-----  
acattgttatcagttaaaaagtctatggaacggtaagcatgttaattagtcagtcctgacgctgctgggtgacaggttgg  
aattaggctctgcatttagctgttttggatggctgctgtcgccgccatacatgatcatcttcttgggttgatggtac  
ctaaccgcgtaaacatgttaaccttaggccatgtattaactccgctctaagtgttggatgtgtattgtcaaacttg  
agaactagttgcatgcatgaaaaataataagtgtctgggtatc  
>Balsas\_INIFAP JSG 374\_AY106371  
tcgcattcacattgttatcagttaaaaagtctatggaacggtaagcatgttaattagtcagtcctgacgctgctgggtgac  
aggttggtaattaggctctgcatttagctgttttggatggctgctgtcgccgccatacatgatcatcttcttgggttg  
tatggtacctaaccgcgtaaacatgttaaccttaggccatgtattacttactccgctctaagtgttggatgtgtattgtc  
aaacttgagaaccagttgcatgcatgaaaaataataagtgtctgggtatc  
>Balsas\_INIFAP JSG y LOS 161\_AY106371  
tc-----  
acattgttatcagttaaaaagtctatggaacggtaagcatgttaattagtcagtcctgacgctgctgggtgacaggttgg  
aattaggctctgcatttagctgttttggatggctgctgtcgccgccatacatgatcatcttcttgggttgatggtac  
ctaaccgcgtaaacatgttaaccttaggccatgtattaactccgctctaagtgttggatgtgtattgtcaaacttg  
agaactagttgcatgcatgaaaaataataagtgtctgggtatc  
>Balsas\_CIMMYT 11355\_AY106371  
tc-----  
acattgttatcagttaaaaagtctatggaacggtaagcatgttaattagtcagtcctgacgctgctgggtgacaggttgg  
aattaggctctgcatttagctgttttggatggctgctgtcgccgccatacatgatcatcttcttgggttgatggtac  
ctaaccgcgtaaacatgttaaccttaggccatgtattaactccgctctaagtgttggatgtgtattgtcaaacttg  
agaactagttgcatgcatgaaaaataataagtgtctgggtatc  
>Balsas\_USDA PI566686\_AY106371  
tcg-----  
cattgttatcagttaaaaagtctatggaacggtaagcatgttaattagtcagtcctgacgctgctgggtgacaggttgg  
aattaggctctgcatttagctgttttggatggctgctgtggccgccatacatgatcatcttcttgggttgatggtacc  
taaccgcgtaagcatattaaccttaggccatgtattaactctgctctaagtgttggatgtgtattgtcaaacttgca  
gaactagttgcatgcatgaaaaataataagtgtctgggtatc  
>Jalisco\_INIFAP JSG y MAS 264\_AY106371  
tcgcattcacattgttatcagttaaaaagtctatggaacggtaagcatgttaattagtcagtcctgacgctgctgggtgac  
aggttggtaattaggctctgcatttagctgttttggatggctgctgtcgccgccatacatgatcatcttcttgggttg  
tatggtacctaaccgcgtaaacatgttaaccttaggccatgtattaactccgctctaagtgttggatgtgtattgtc  
aaacttgagaactagttgcatgcatgaaaaataataagtgtctgggtatc  
>Tripsacum\_WW-2120\_AY106371  
tcg-----cattgttatcagttaaaaagtctatgggtcggttaagcatgttaattagtcagtcctgacgctgctg-----  
-----  
catttagcttttttggatggctgctgtcgccgccatacatgatcatcttcttgggttggtgtgtacctaaccgcgtaa  
gcatattaaccttaggccatgtattttaccccgctctaagtactgtatgcgtattgtgaaacttgagaaccagttgc  
atgtatgaaaaataataagtgtctgggtatc



>B73\_AY106889

gagttgCGGCGGCATACAGTTCAGATTTGTTcagagcatagataggtcagtaagcatcgtaattctttcgtgtttctcct  
ttgtacatgtgCCGTAaattgtgtatTTGGGGAGGGAGATAAGTtGTGTtGtattatctcaacaacaa-agtgtgatac-

-----  
gctggcagatcacgcggaatggtgatctaccatgggcctgattttgcggtggccgggtcagcttgtttttgtaaagtgagg  
tggccatcgattttatcatataagctta

>Oh43\_AY106889

----

ttgcggcggcatacagttcagatTTGTTcagagcatagataggtcagtaagcatcgtaattctttcgtgtttctcctttg  
tacctgtgCCGTAaattgtgtatTTGGGGAGGGAGATAAGTtGTGTtGtattatctcaacaacaa-agtgtgatac----

----

gctggcagatcacgcggaatggtgatctaccatgggcctgattttgcggtggccgggtcagcttgtttttgtaaagtgagg  
tggccatcgattttatcatataagctta

>IL14H\_AY106889

-----

ggcatacagttcagatTTGTTcagagcatagataggtcagtaagcatcgtaattctttcgtgtttctcctttgtacatgt  
gCCGTAaattgtgtatTTGGGGAGGGAGATAAGTtGTGTtGtattatctcaacaacaa-agtgtgatac-----

gctggcagatcacgcggaatggtgatctaccatgggcctgattttgcggtggccgggtcagcttgtttttgtaaagtgagg  
tggccatcgattttatcatat-----

>Mo17\_AY106889

gagttgCGGCGGCATACAGTTCAGATTTGTTcagagcatagataggtcagtaagcatcgtaattctttcgtgtttctcct  
ttgtacatgtgCCGTAaattgtgtatTTGGGGAGGGAGATAAGTtGTGTtGtattatctcaacaacaa-agtgtgatac-

-----

gctggcagatcacgcggaatggtgatctaccatgggcctgattttgcggtggccgggtcagcttgtttttgtaaagtgagg  
tggccatcgattttatcatataagctt-

>Ky21\_AY106889

gagttgCGGCGGCATACAGTTCAGATTTGTTcagagcatagataggtcagtaagcatcgtaattctttcgtgtttctcct  
ttgtacatgtgCCGTAaattgtgtatTTGGGGAGGGAGATAAGTtGTGTtGtattatctcaacaacaa-agtgtgatac-

-----

gctggcagatcacgcggaatggtgatctaccatgggcctgattttgcggtggccgggtcagcttgtttttgtaaagtgagg  
tggccatcgatttt-----

>M37W\_AY106889

-----

catacagttcagatTTGTTcagagcatagataggtcagtaagcatcgtaattctttcgtgtttctcctttgtacatgtgc  
cGTAaattgtgtatTTGGGGAGGGAGATAAGTtGTGTtGtattatctcaacaacaa-agtgtgatac-----

gctggcagatcacgcggaatggtgatctaccatgggcctgattttgcggtggccgggtcagcttgtttttgtaaagtgagg  
tggccatcgattttatcatata-----

>HP301\_AY106889

gagttgCGGCGGCATACAGTTCAGATTTGTTcagagcatagataggtcagtaagcatcgtaattctttcgtgtttctcct  
ttgtacatgtgCCGTAaattgtgtatTTGGGGAGGGAGATAAGTtGTGTtGtattatctcaacaacaa-agtgtgatac-

-----

gctggcagatcacgcggaatggtgatctaccatgggcctgattttgcggtggccgggtcagcttgtttttgtaaagtgagg  
tggccatcgattttatcatataagctta

>CML247\_AY106889

gagttgCGGCGGCATACAGTTCAGATTTGTTcagagcatagataggtcagtaagcatcgtaattctttcgtgtttctcct  
ttgtacatgtgCCGTAaattgtgtatTTGGGGAGGGAGATAAGTtGTGTtGtattatctcaacaacaa-agtgtgatac-

-----

gctggcagatcacgcggaatggtgatctaccatgggcctgattttgcggtggccgggtcagcttgtttttgtaaagtgagg  
tggccatcgattttatcatataagctta

>NC350\_AY106889

-----

catacagttcagatTTGTTcagagcatagataggtcagtaagcatcgtaattctttcgtgtttctcctttgtacatgtgc  
cGTAaattgtgtatTTGGGGAGGGAGATAAGTtGTGTtGtattatctcaacaacaa-agtgtgatac-----

gctggcagatcacgcggaatggtgatctaccatgggcctgattttgcggtggccgggtcagcttgtttttgtaaagtgagg

tggccatcgattttatcatata-----  
>Ki3\_AY106889  
gagttgccccggcatacagttcagatttggtcagagcatagataggtcagtaagcatcgtaattctttcgtgtttctcct  
ttgtacatgtgccgtaaattgtgtatttggggagggagataagttgtgttgattatctcaacaacaa-agtgtgatac-  
-----  
gctggcagatcacgcggaatggtgatctaccatgggcctgattttgcggtggccgggtcagcttggttttgtaaagtgagg  
tggccatcgattttatcatataagc---  
>Kill\_AY106889  
gagttgccccggcatacagttcagatttggtcagagcatagataggtcagtaagcatcgtaattctttcgtgtttctcct  
ttgtacatgtgccgtaaattgtgtatttggggagggagataagttgtgttgattatctcaacaacaa-agtgtgatac-  
-----  
gctggcagatcacgcggaatggtgatctaccatgggcctgattttgcggtggccgggtcagcttggttttgtaaagtgagg  
tggccatcgattttatcatata-----  
>CML333\_AY106889  
gagttgccccggcatacagttcagatttggtcagagcatagataggtcagtaagcatcgtaattctttcgtgtttctcct  
ttgtacatgtgccgtaaattgtgtatttggggagggagataagttgtgttgattatctcaacaacaa-agtgtgatac-  
-----  
gctggcagatcacgcggaatggtgatctaccatgggcctgattttgcggtggccgggtcagcttggttttgtaaagtgagg  
tggccatcgattttatcatat-----  
>CML322\_AY106889  
-----  
ggcatacagttcagatttggtcagagcatagataggtcagtaagcatcgtaattctttcgtgtttctcctttgtacatgt  
gccgtaaattgtgtatttggggagggagataagttgtgttgattatctcaacaacaa-agtgtgatac-----  
gctggcagatcacgcggaatggtgatctaccatgggcctgattttgcggtggccgggtcagcttggttttgtaaagtgagg  
tggccatcgattttatcatat-----  
>CML69\_AY106889  
-----  
ggcatacagttcagatttggtcagagcatagataggtcagtaagcatcgtaattctttcgtgtttctcctttgtacatgt  
gccgtaaattgtgtatttggggagggagataagttgtgttgattatctcaacaacaa-agtgtgatac-----  
gctggcagatcacgcggaatggtgatctaccatgggcctgattttgcggtggccgggtcagcttggttttgtaaagtgagg  
tggccatcgattttatcata-----  
>Gordo\_CHH 160\_AY106889  
-----  
-----tgtgttgattatctcaacaacaa-agtgtgatac-  
-----  
gctggcagatcacgcggaatggtgatctaccatgggcctgattttgcggtggccgggtcagcttggttttgtaaagtgagg  
tggccatcgattttatcatataagctta  
>Sabanero\_SAN 329\_AY106889  
-----  
-----gtgttgattatctcaacaacaa-agtgtgatac-  
-----  
gctggcagatcacgcggaatggtgatctaccatgggcctgattttgcggtggccgggtcagcttggttttgtaaagtgagg  
tggccatcgattttatcatataagctta  
>Serrano\_GUA 14\_AY106889  
-----  
-----ttgtgttgattatctcaacaacaa-agtgtgatac-  
-----  
gctggcagatcacgcggaatggtgatctaccatgggcctgattttgcggtggccgggtcagcttggttttgtaaagtgagg  
tggccatcgattttatcatataagctta  
>Bolita\_OAX 68\_AY106889  
-----  
-----ttgtgttgattatctcaacaacaa-agtgtgatac-  
-----  
gctggcagatcacgcggaatggtgatctaccatgggcctgattttgcggtggccgggtcagcttggttttgtaaagtgagg  
tggccatcgattttatcatataagctta  
>Chalqueno\_MEX 48\_AY106889  
-----

-----gttgtgtgtattatctcaacaacaa-agtgtgatac-  
-----  
gctggcagatcacgcggaatggtgatctaccatgggcctgattttgcggtggccgggtcagcttgTTTTgtaaagtgagg  
tggccatcgattttatcatataagctta  
>Chapalote\_SIN 2\_AY106889  
-----  
-----ttgtgtgtattatctcaacaacaa-agtgtgatac-  
-----  
gctggcagatcacgcggaatggtgatctaccatgggcctgattttgcggtggccgggtcagcttgTTTTgtaaagtgagg  
tggccatcgattttatcatataagctta  
>Conico\_PUE 32\_AY106889  
-----  
-----gttgtgtgtattatctcaacaacaa-agtgtgatac-  
-----  
gctggcagatcacgcggaatggtgatctaccatgggcctgattttgcggtggccgggtcagcttgTTTTgtaaagtgagg  
tggccatcgattttatcatataagctta  
>Cristalino Norteno\_CHI 349\_AY106889  
-----  
-----tgtgtgtattatctcaacaacaa-agtgtgatac-  
-----  
gctggcagatcacgcggaatggtgatctaccatgggcctgattttgcggtggccgggtcagcttgTTTTgtaaagtgagg  
tggccatcgattttatcatataagctta  
>Jalisco\_Benz 967\_AY106889  
gagttgccccggcatacagttcagatttgTTCagagcatagataggtcagtaagcatcgtaattctttcgtgtttctcct  
ttgtacatgtgccgtaaattgtgtattttggggagggagataagttgtgtgtattatctcaacaacaa-agtgtgatac-  
-----  
gctggcagatcacgcggaatggtgatctaccatgggcctgattttgcggtggccgggtcagcttgTTTTgtaaagtgagg  
tggccatcgattttatcatataagctta  
>Balsas\_Beadle & Kato Site 4\_AY106889  
gagttgccccggcatacagttcagatttgTTCagagcatagataggtcagtaagcatcgtaattctttcgtgtttctcct  
ttgtacatgtgccgtaaattgtgtattttggggagggagataagttgtgtgtattatctcaacaacaa-agtgtgatac-  
-----  
gctggcagatcacgcggaatggtgatctaccatgggcctgattttgcggtggccgggtcagcttgTTTTgtaaagtgagg  
tggccatcgattttatcatataagctta  
>Balsas\_Kato Site 4\_AY106889  
gagttgccccggcatacagttcagatttgTTCagagcatagataggtcagtaagcatcgtaattctttcgtgtttctcct  
ttgtacatgtgccgtaaattgtgtattttggggagggagataagttgtgtgtattatctcaacaacaa-agtgtgatac-  
-----  
gctggcagatcacgcggaatggtgatctaccatgggcctgattttgcattggccgggtcagcttgTTTTgtaaagtgagg  
tggccatcgattttatcatataagctta  
>Balsas\_INIFAP JSP y Lo5130\_AY106889  
gagttgccccggcatacagttcagatttgTTCagagcatagataggtcagtaagcatcgtaattctttcgtgtttctcct  
ttgtacatgtgccgtaaattgtgtattttggggagggagataagttgtgtgtattatctcaacaacaa-agtgtgatac-  
-----  
gctggcagatcacgcggaatggtgatctaccatgggcctgattttgcggtggccgggtcagcttgTTTTgtaaagtgagg  
tggccatcgattttatcatataagctta  
>Balsas\_INIFAP JSG y LOS 119\_AY106889  
gagttgccccggcatacagttcagatttgTTCagagcatagataggtcagtaagcatcgtaattctttcgtgtttctcct  
ttgtacatgtgccgtaaattgtgtattttggggagggagataagttgtgtgtattatctcaacaacaa-agtgtgatac-  
-----  
gctggcagatcacgcggaatggtgatctaccatgggcctgattttgcggtggccgggtcagcttgTTTTgtaaagtgagg  
tgaccatcgattttatcatataagctta  
>Jalisco\_INIFAP JSG y MAS 401\_AY106889  
gagttgccccggcatacagttcagatttgTTCagagcatagataggtcagtaagcatcgtaattctttcgtgtttctcct  
ttgtacatgtgccgtaaattgtgtattttggggagggagataagttgtgtgtattatctcaacaacaa-agtgtgatac-  
-----  
gctggcagatcacgcggaatggtgatctaccatgggcctgattttgcggtggccgggtcagcttgTTTTgtaaagtgagg

tggccatcgatTTTTATCATATAAGCTTA  
>Balsas\_CIMMYT 8783\_AY106889  
gagttgCGGCGGCATACAGTTCAGATTTGTTcagagcatagataggtcagtaagcatcgtaattctttcgtgtttctcct  
ttgtacatgtgCCGTAaattTGTGtatttggggagggagataagttgtgttGtattatctcaacaacaa-agtgtgatac-  
-----  
gctggcagatcacgcggaatggtgatctaccatgggcctgattttgCGTtggccgggtcagcttgTTTTgtaaagtgagg  
tggccatcgatTTTTATCATATAAGCTTA  
>Oaxaca\_INIFAP JSG 197\_AY106889  
gagttgCGGCGGCATACAGTTCAGATTTGTTcagagcatagataggtcagtaagcatcgtaattctttcgtgtttctcct  
ttgtacatgtgCCGTAaattTGTGtatttggggagggagataagttgtgttGtattatctcaacaacaa-agtgtgatac-  
-----  
gctggcagatcacgcggaatggtgatctaccatgggcctgattttgCGTtggccgggtcagcttgTTTTgtaaagtgagg  
tggccatcgatTTTTATCATATAAGCTTA  
>Balsas\_INIFAP JSG y LOS 109\_AY106889  
gagttgCGGCGGCATACAGTTCAGATTTGTTcagagcatagataggtcagtaagcatcgtaattctttcgtgtttctcct  
ttgtacatgtgCCGTAaattTGTGtatttggggagggagataagttgtgttGtattatctcaacaacaa-agtgtgatac-  
-----  
gctggcagatcacgcggaatggtgatctaccatgggcctgattttgCGTtggccgggtcagcttgTTTTgtaaagtgagg  
tggccatcgatTTTTATCATATAAGCTTA  
>Balsas\_INIFAP JSG 378\_AY106889  
gagttgCGGCGGCATACAGTTCAGATTTGTTcagagcatagataggtcagtaagcatcgtaattctttcgtgtttctcct  
ttgtacatgtgCCGTAaattTGTGtatttggggagggagataagttgtgttGtattatctcaacaacaa-agtgtgatac-  
-----  
gctggcagatcacgcggaatggtgatctaccatgggcctgattttgCGTtggccgggtcagcttgTTTTgtaaagtgagg  
tggccatcgatTTTTATCATATAAGCTTA  
>Balsas\_INIFAP JSG 374\_AY106889  
gagttgCGGCGGCATACAGTTCAGATTTGTTcagagcatagataggtcagtaagcatcgtaattctttcgtgtttctcct  
ttgtacatgtgCCGTAaattTGTGtatttggggagggagataagttgtgttGtattatctcaacaacaa-agtgtgatac-  
-----  
gctggcagatcacgcggaatggtgatctaccatgggcctgattttgCGTtggccgggtcagcttgTTTTgtaaagtgagg  
tggccatcgatTTTTATCATATAAGCTTA  
>Balsas\_INIFAP JSG y LOS 161\_AY106889  
gagttgCGGCGGCATACAGTTCAGATTTGTTcagagcatagataggtcagtaagcatcgtaattctttcgtgtttctcct  
ttgtacatgtgCCGTAaattTGTGtatttggggagggagataagttgtgttGtattatctcaacaacaa-agtgtgatac-  
-----  
gctggcagatcacgcggaatggtgatctaccatgggcctgattttgCGTtggccgggtcagcttgTTTTgtaaagtgagg  
tggccatcgatTTTTATCATATAAGCTTA  
>Balsas\_CIMMYT 11355\_AY106889  
gagttgCGGCGGCATACAGTTCAGATTTGTTcagagcatagataggtcagtaagcatcgtaattctttcgtgtttctcct  
ttgtacatgtgCCGTAaattTGTGtatttggggagggagataagttgtgttGtattatctcaacaacaa-agtgtgatac-  
-----  
gctggcagatcacgcggaatggtgatctaccatgggcctgattttgCGTtggccgggtcagcttgTTTTgtaaagtgagg  
tggccatcgatTTTTATCATATAAGCTTA  
>Balsas\_USDA PI566686\_AY106889  
gagttgCGGCGGCATACAGTTCAGATTTGTTcagagcatagataggtcagtaagcatcgtaattctttcgtgtttctcct  
ttgtacatgtgCCGTAaattTGTGtatttggggagggagataagttgtgttGtattatctcaacaacaa-agtgtgatac-  
-----  
gctggcagatcacgcggaatggtgatctaccatgggcctgattttgCGTtggccgggtcagcttgTTTTgtaaagtgagg  
tggccatcgatTTTTATCATATAAGCTTA  
>Jalisco\_INIFAP JSG y MAS 264\_AY106889  
gagttgCGGCGGCATACAGTTCAGATTTGTTcagagcatagataggtcagtaagcatcgtaattctttcgtgtttctcct  
ttgtacatgtgCCGTAaattTGTGtatttggggagggagataagttgtgttGtattatctcaacaacaa-agtgtgatac-  
-----  
gctggcagatcacgcggaatggtgatctaccatgggcctgattttgCGTtggccgggtcagcttgTTTTgtaaagtgagg  
tggccatcgatTTTTATCATATAAGCTTA  
>Tripsacum\_WW-2120\_AY106889  
gagttgCGGCGGCATACAGTTCAGATTTGTTcagagcatagataggtcagtaagcatcgtaattctttcgtgtttcccc

ttgtacatgtgccgtaaatttgtgtatctggggagggagataagttatgttattatctcaaaa-  
aacagtgttataacttgggtataactggcagatcatgaggtctgggtgatctaccgtgtgctgattttgcgctggccggtca  
gcttctttttgtaaagtggggtggccatcgattttattatgtaagctta

>B73\_AY107535

-

ctcatcggtaaatgatctcaacatatgtgcagagaatcactgtgcaagtttcgagaccgccacagcattggcttttataag  
ctggtttgcgctggcgccatcctgtatcttgaatttctgggtcgatggcctccagatgataaatataggatgttataaaac  
atagtatttttgaatgggttctggacaaggtcgctgcttatggtagcagcaaagcaacgcggtgccgtaaagctaattgt  
aataccagaaattggtgaatggctgtggaatgta

>Oh43\_AY107535

tctcatcggtaaatgatctcaacatatgtgcagagaatcactgtgcaagtttcgagaccgccacagcattggcttttataa  
gctggtttgcgctggcgccatcctgtatcttgaatttctgggtcgatggcctccagatgataaatataggatgttataaaa  
catagtatttttgaatgggttctggacaaggtcgctgcttatggtagcagcaaagcaacgcggtgccgtaaagctaattg  
taataccagaaattggtgaatggctgtggaatgta

>IL14H\_AY107535

tctcatcggtaaatgatctcaacatatgtgcagagaatcactgtgcaagtttcgagaccgccacagcattggcttttataa  
gctggtttgcgctggcgccatcctgtatcttgaatttctgggtcgatggcctccagatgataaatataggatgttataaaa  
catagtatttttgaatgggttctggacaaggtcgctgcttatggtagcagcaaagcaacgcggtgccgtaaagctaattg  
taataccagaaattggtgaatggctgtggaatg--

>Mo17\_AY107535

tctcatcggtaaatgatctcaacatatgtgcagagaatcactgtgcaagtttcgagaccgccacagcattggcttttataa  
gctggtttgcgctggcgccatcctgtatcttgaatttctgggtcgatggcctccagatgataaatataggatgttataaaa  
catagtatttttgaatgggttctggacaaggtcgctgcttatggtagcagcaaagcaacgcggtgccgtaa-----  
---taccagaaattggtgaatggctgtggaatgta

>Ky21\_AY107535

----

catcggtaaatgatctcaacatatgtgcagagaatcactgtgcaagtttcgagaccgccacagcattggcttttataagct  
ggtttgcgctggcgccatcctgtatcttgaatttctgggtcgatggcctccagatgataaatataggatgttataaaacat  
agtatttttgaatgggttctggacaaggtcgctgcttatggtagcagcaaagcaacgcggtgccgtaaagctaattgtaa  
taccagaaattggtgaatggctgtggaatgta

>M37W\_AY107535

tctcatcggtaaatgatctcaacatatgtgcagagaatcactgtgcaagtttcgagaccgccacagcattggcttttataa  
gctggtttgcgctggcgccatcctgtatcttgaatttctgggtcgatggcctccagatgataaatataggatgttataaaa  
catagtatttttgaatgggttctggacaaggtcgctgcttatggtagcagcaaagcaacgcggtgccgtaaagctaattg  
taataccagaaattggtgaatggctgtggaatgta

>HP301\_AY107535

-----

acatatgtgcagagaatcactgtgcaagtttcgagaccgccacagcattggcttttataagctggtttgcgctggcgcca  
tctgtatcttgaatttctgggtcgatggcctccagatgataaatataggatgttataaaacatagtatttttgaatgggt  
tctggacaaggtcgctgcttatggtagcagcaaagcaacgcggtgccgtaaagctaattgtaataccagaaattggtga  
atggctgtggaatgta

>CML247\_AY107535

----

atcggtaaatgatctcaacatatgtgcagagaatcactgtgcaagtttcgagaccgccacagcattggcttttataagctg  
gtttgcgctggcgccatcctgtatcttgaatttctgggtcgatggcctccagatgataaatataggatgttataaaacata  
gtatttttgaatgggttctggacaaggtcgctgcttatggtagcagcaaagcaacgcggtgccgtaaagctaattgta  
accagaaattggtgaatggctgtg-----

>NC350\_AY107535

tctcatcggtaaatgatctcaacatatgtgcagagaatcactgtgcaagtttcgagaccgccacagcattggcttttataa  
gctggtttgcgctggcgccatcctgtatcttgaatttctgggtcgatggcctccagatgataaatataggatgttataaaa  
catagtatttttgaatgggttctggacaaggtcgctgcttatggtagcagcaaagcaacgcggtgccgtaaagctaattg  
taataccagaaattggtgaatggctgtggaatg--

>Ki3\_AY107535

tctcatcggtaaatgatctcaacatatgtgcagagaatcactgtgcaagtttcgagaccgccacagcattggcttttataa

gctgggttgcgctggcgccatcctgtatcttgaatcttctggctcgatggcctccagatgataaatataggatggtataaaa  
catagtatcttgaatgggtctggacaaggctcgctgcttatggtagcagcaaagcaacgcggtgccgtaaagctaattg  
taataccagaaattggtgaatggctgtggaatgta

>Kill\_AY107535

-

ctcatcggtaatgatctcaacatgatgtgcagagaatcactgtgcaagtttcgagaccgccacagcattggcttttataag  
ctgggttgcgctggcgccatcctgtatcttgaatcttctggctcgatggcctccagatgataaatataggatggtataaaac  
atagtatcttgaatgggtctggacaaggctcgctgcttatggtagcagcaaagcaacgcggtgccgtaaagctaattgt  
aataccagaaattggtgaatggctgtggaatgta

>CML333\_AY107535

----

atcggtaatgatctcaacatgatgtgcagagaatcactgtgcaagtttcgagaccgccacagcattggcttttataagctg  
gttgcgctggcgccatcctgtatcttgaatcttctggctcgatggcctccagatgataaatataggatggtataaaacata  
gtatcttgaatgggtctggacaaggctcgctgcttatggtagcagcaaagcaacgcggtgccgtaaagctaattgta  
accagaaattggtgaatggctgtggaatgta

>CML322\_AY107535

-----

tcggtaatgatctcaacatgatgtgcagagaatcactgtgcaagtttcgagaccgccacagcattggcttttataagctgg  
tttgcgctggcgccatcctgtatcttgaatcttctggctcgatggcctccagatgataaatataggatggtataaaacatag  
tattcttgaatgggtctggacaaggctcgctgcttatggtagcagcaaagcaacgcggtgccgtaaagctaattgtaata  
cccagaaattggtgaatggctgtggaatgta

>CML69\_AY107535

-----

ggtaatgatctcaacatgatgtgcagagaatcactgtgcaagtttcgagaccgccacagcattggcttttataagctgggt  
tgcgctggcgccatcctgtatcttgaatcttctggctcgatggcctccagatgataaatataggatggtataaaacatagta  
ttttgaatgggtctggacaaggctcgctgcttatggtagcagcaaagcaacgcggtgccgtaaagctaattgtaatacc  
cagaaattggtgaatggctgtggaatgt-

>Gordo\_CHH 160\_AY107535

tctcatcggtaatgatctcaacatgatgtgcagagaatcactgtgcaagtttcgagaccgccacagcattggcttttataa  
gctgggttgcgctggcgccatcctgtatcttgaatcttctggctcgatggcctccagatgataaatataggatggtataaaa  
catagtatcttgaatgggtctggacaaggctcgctgcttatggtagcagcaaagcaacgcggtgccgtaaagctaattg  
taataccagaaattggtgaatggctgtggaatgta

>Guirua\_MAG 450\_AY107535

tctcatcggtaatgatctcaacatgatgtgcagagaatcactgtgcaagtttcgagaccgccacagcattggcttttataa  
gctgggttgcgctggcgccatcctgtatcttgaatcttctggctcgatggcctccagatgataaatataggatggtataaaa  
catagtatcttgaatgggtctggacaaggctcgctgcttatggtagcagcaaagcaacgcggtgccgtaaagctaattg  
taataccagaaattggtgaatggctgtggaatgta

>Pisscotunto\_APC 13\_AY107535

-----

atgatctcaacatgatgtgcagagaatcactgtgcaagtttcgagaccgccacagcattggcttttataagctgggttgcg  
ctggcgccatcctgtatcttgaatcttctggctcgatggcctccagatgataaatataggatggtataaaacatagtatctt  
tgaatgggtctggacaaggctcgctgcttatggtagcagcaaagcaacgcggtgccgtaaagctaattgtaataccaga  
aattggtgaatggctgtggaatgta

>Sabanero\_SAN 329\_AY107535

tctcatcggtaatgatctcaacatgatgtgcagagaatcactgtgcaagtttcgagaccgccacagcattggcttttataa  
gctgggttgcgctggcgccatcctgtatcttgaatcttctggctcgatggcctccagatgataaatataggatggtataaaa  
catagtatcttgaatgggtctggacaaggctcgctgcttatggtagcagcaaagcaacgcggtgccgtaaagctaattg  
taataccagaaattggtgaatggctgtggaatgta

>Serrano\_GUA 14\_AY107535

tctcatcggtaatgatctcaacatgatgtgcagagaatcactgtgcaagtttcgagaccgccacagcattggcttttataa  
gctgggttgcgctggcgccatcctgtatcttgaatcttctggctcgatggcctccagatgataaatataggatggtataaaa  
catagtatcttgaatgggtctggacaaggctcgctgcttatggtagcagcaaagcaacgcggtgccgtaaagctaattg  
taataccagaaattggtgaatggctgtggaatgta

>Zapalote Chico\_OAX 70\_AY107535

tctcatcggtaatgatctcaacatgatgtgcagagaatcactgtgcaagtttcgagaccgccacagcattggcttttataa  
gctgggttgcgctggcgccatcctgtatcttgaatcttctggctcgatggcctccagatgataaatataggatggtataaaa  
catagtatcttgaatgggtctggacaaggctcgctgcttatggtagcagcaaagcaacgcggtgccgtaaagctaattg

taatacccagaaattggtgaatggctgtggaatgta

>Bolita\_OAX 68\_AY107535

tctcatcggtaaatgatctcaacatatgtgcagagaatcactgtgcaagtttcgagaccgccacagcattggcttttataa  
gctgggttgcgctggcgccatcctgtatcttgaatttctggctcgatggcctccagatgataaatataggatgttataaaa  
catagtatttttgaatgggttctggacaaggtcgctgcttatggtagcagcaaagcaacgcggtgccgtaaagctaattg  
taatacccagaaattggtgaatggctgtggaatgta

>Cateto Sulino\_URG 11\_AY107535

-----

atgatctcaacatatgtgcagagaatcactgtgcaagtttcgagaccgccacagcattggcttttataagctgggttgcg  
ctggcgccatcctgtatcttgaatttctggctcgatggcctccagatgataaatataggatgttataaaacatagtatttt  
tgaatgggttctggacaaggtcgctgcttatggtagcagcaaagcaacgcggtgccgtaaagctaattgtaatacccaga  
aattggtgaatggctgtggaatgta

>Chalqueno\_MEX 48\_AY107535

tctcatcggtaaatgatctcaacatatgtgcagagaatcactgtgcaagtttcgagaccgccacagcattggcttttataa  
gctgggttgcgctggcgccatcctgtatcttgaatttctggctcgatggcctccagatgataaatataggatgttataaaa  
catagtatttttgaatgggttctggacaaggtcgctgcttatggtagcagcaaagcaacgcggtgccgtaaagctaattg  
taatacccagaaattggtgaatggctgtggaatgta

>Chapalote\_SIN 2\_AY107535

tctcatcggtaaatgatctcaacatatgtgcagagaatcactgtgcaagtttcgagaccgccacagcattggcttttataa  
gctgggttgcgctggcgccatcctgtatcttgaatttctggctcgatggcctccagatgataaatataggatgttataaaa  
catagtatttttgaatgggttctggacaaggtcgctgcttatggtagcagcaaagcaacgcggtgccgtaaagctaattg  
taatacccagaaattggtgaatggctgtggaatgta

>Conico\_PUE 32\_AY107535

tctcatcggtaaatgatctcaacatatgtgcagagaatcactgtgcaagtttcgagaccgccacagcattggcttttataa  
gctgggttgcgctggcgccatcctgtatcttgaatttctggctcgatggcctccagatgataaatataggatgttataaaa  
catagtatttttgaatgggttctggacaaggtcgctgcttatggtagcagcaaagcaacgcggtgccgtaaagctaattg  
taatacccagaaattggtgaatggctgtggaatgta

>Costeno\_VEN 453\_AY107535

tctcatcggtaaatgatctcaacatatgtgcagagaatcactgtgcaagtttcgagaccgccacagcattggcttttataa  
gctgggttgcgctggcgccatcctgtatcttgaatttctggctcgatggcctccagatgataaatataggatgttataaaa  
catagtatttttgaatgggttctggacaaggtcgctgcttatggtagcagcaaagcaacgcggtgccgtaaagctaattg  
taatacccagaaattggtgaatggctgtggaatgta

>Cristalino Norteno\_CHI 349\_AY107535

tctcatcggtaaatgatctcaacatatgtgcagagaatcactgtgcaagtttcgagaccgccacagcattggcttttataa  
gctgggttgcgctggcgccatcctgtatcttgaatttctggctcgatggcctccagatgataaatataggatgttataaaa  
catagtatttttgaatgggttctggacaaggtcgctgcttatggtagcagcaaagcaacgcggtgccgtaaagctaattg  
taatacccagaaattggtgaatggctgtggaatgta

>Dzit Bacal\_GUA 131\_AY107535

tctcatcggtaaatgatctcaacatatgtgcagagaatcactgtgcaagtttcgagaccgccacagcattggcttttataa  
gctgggttgcgctggcgccatcctgtatcttgaatttctggctcgatggcctccagatgataaatataggatgttataaaa  
catagtatttttgaatgggttctggacaaggtcgctgcttatggtagcagcaaagcaacgcggtgccgtaaagctaattg  
taatacccagaaattggtgaatggctgtggaatgta

>Jalisco\_Benz 967\_AY107535

tctcatcggtaaatgatctcaacatatgtgcagagaatcactgtgcaagtttcgagaccgccacagcattggcttttataa  
gctgggttgcgctggcgccatcctgtatcttgaatttctggctcgatggcctccagatgataaatataggatgttataaaa  
catagtatttttgaatgggttctggacaaggtcgctgcttatggtagcagcaaagcaacgcggtgccgtaaagctaattg  
taatacccagaaattggtgaatggctgtggaatgta

>Balsas\_Beadle & Kato Site 4\_AY107535

tctcatcggtaaatgatctcaacatatgtgcagagaatcactgtgcaagtttcgagaccgccacagcattggcttttataa  
gctgggttgcgctggcgccatcctgtatcttgaatttctggctcgatggcctccagatgataaatataggatgttataaaa  
catagtatttttgaatgggttctggacaaggtcgctgcttatggtagcagcaaagcaacgcggtgccgtaaagctaattg  
taatacccagaaattggtgaatggctgtggaatgta

>Balsas\_Kato Site 4\_AY107535

tctcatcggtaaatgatctcaacatatgtgcagagaatcactgtgcaagtttcgagaccgccacagcattggcttttataa  
gctgggttgcgctggcgccatcctgtatcttgaatttctggctcgatggcctccagatgataaatataggatgttataaaa  
catagtatttttgaatgggttctggacaaggtcgctgcttatggtagcagcaaagcaacgcggtgccgtaaagctaattg  
taatacccagaaattggtgaatggctgtggaatgta

>Balsas\_Wilkes Site 6\_AY107535

tctcatcggtaaatgatctcaacatatgtgcagagaatcactgtgcaagtttcgagaccgccacagcattggcttttataa  
gctggtttgcgctggcgccatcctgtatcttgaatttctggctcgatggcctccagatgataaatataggatgttataaaa  
catagtatTTTTgaatggTTTTctggacaaggctcgctgcttatggtagcagcaaagcaacgcggtgccgtaaagctaattg  
taatacccagaaattgTTgaatggctgtggaatgta

>Balsas\_INIFAP JSP y Lo5130\_AY107535

tctcatcggtaaatgatctcaacatatgtgcagagaatcactgtgcaagtttcgagaccgccacagcattggcttttataa  
gctggtttgcgctggcgccatcctgtatcttgaatttctggctcgatggcctccagatgataaatataggatgttataaaa  
catagtatTTTTgaatggTTTTctggacaaggctcgctgcttatggtagcagcaaagcaacgcggtgccgtaaagctaattg  
taatacccagaaattgTTgaatggctgtggaatgta

>Balsas\_INIFAP JSG y LOS 119\_AY107535

tctcatcggtaaatgatctcaacatatgtgcagagaatcactgtgcaagtttcgagaccgccacagcattggcttttataa  
gctggtttgcgctggcgccatcctgtatcttgaatttctggctcgatggcctccagatgataaatataggatgttataaaa  
catagtatTTTTgaatggTTTTctggacaaggctcgctgcttatggtagcagcaaagcaacgcggtgccgtaaagctaattg  
taatacccagaaattgTTgaatggctgtggaatgta

>Jalisco\_INIFAP JSG y MAS 401\_AY107535

tctcatcggtaaatgatctcaacatatgtgcagagaatcactgtgcaagtttcgagaccgccacagcattggcttttataa  
gctggtttgcgctggcgccatcctgtatcttgaatttctggctcgatggcctccagatgataaatataggatgttataaaa  
catagtatTTTTgaatggTTTTctggacaaggctcgctgcttatggtagcagcaaagcaacgcggtgccgtaaagctaattg  
taatacccagaaattgTTgaatggctgtggaatgta

>Balsas\_CIMMYT 8783\_AY107535

tctcatcggtaaatgatctcaacatatgtgcagagaatcactgtgcaagtttcgagaccgccacagcattggcttttataa  
gctggtttgcgctggcgccatcctgtatcttgaatttctggctcgatggcctccagatgataaatataggatgttataaaa  
catagtatTTTTgaatggTTTTctggacaaggctcgctgcttatggtagcagcaaagcaacgcggtgccgtaa-----  
---taccagaaattgTTgaatggctgtggaatgta

>Oaxaca\_INIFAP JSG 197\_AY107535

tctcatcggtaaatgatctcaacatatgtgcagagaatcactgtgcaagtttcgagaccgccacagcattggcttttataa  
gctggtttgcgctggcgccatcctgtatcttgaatttctggctcgatggcctccagatgataaatataggatgttataaaa  
catagtatTTTTgaatggTTTTctggacaaggctcgctgcttatggtagcagcaaagcaacgcggtgccgtaaagctaattg  
taatacccagaaattgTTgaatggctgtggaatgta

>Balsas\_INIFAP JSG y LOS 109\_AY107535

tctcatcggtaaatgatctcaacatatgtgcagagaatcactgtgcaagtttcgagaccgccacagcattggcttttataa  
gctggtttgcgctggcgccatcctgtatcttgaatttctggctcgatggcctccagatgataaatataggatgttataaaa  
catagtatTTTTgaatggTTTTctggacaaggctcgctgcttatggtagcagcaaagcaacgcggtgccgtaaagctaattg  
taatacccagaaattgTTgaatggctgtggaatgta

>Balsas\_INIFAP JSG 378\_AY107535

tgtcatcggtaaatgatctcaacatatgtgcagagaatcactgtgcaagtttcgagaccgccacagcattggcttttataa  
gctggtttgcgctggcgccatcctgtatcttgaatttctggctcgatggcctccagatgataaatataggatgttataaaa  
catagtatTTTTgaatggTTTTctggacaaggctcgctgcttatggtagcagcaaagcaacgcggtgccgtaa-----  
---taccagaaattgTTgaatggctgtggaatgta

>Balsas\_INIFAP JSG 374\_AY107535

tctcatcggtaaatgatctcaacatatgtgcagagaatcactgtgcaagtttcgagaccgccacagcattggcttttataa  
gctggtttgcgctggcgccatcctgtatcttgaatttctggctcgatggcctccagatgataaatataggatgttataaaa  
catagtatTTTTgaatggTTTTctggacaaggctcgctgcttatggtagcagcaaagcaacgcggtgccgtaaagctaattg  
taatacccagaaattgTTgaatggctgtggaatgta

>Balsas\_INIFAP JSG y LOS 161\_AY107535

tctcatcggtaaatgatctcaacatatgtgcagagaatcactgtgcaagtttcgagaccgccacagcattggcttttataa  
gctggtttgcgctggcgccatcctgtatcttgaatttctggctcgatggcctccagatgataaatataggatgttataaaa  
catagtatTTTTgaatggTTTTctggacaaggctcgctgcttatggtagcagcaaagcaacgcggtgccgtaaagctaattg  
taatacccagaaattgTTgaatggctgtggaatgta

>Balsas\_CIMMYT 11355\_AY107535

tctcatcggtaaatgatctcaacatatgtgcagagaatcactgtgcaagtttcgagaccgccacagcattggcttttataa  
gctggtttgcgctggcgccatcctgtatcttgaatttctggctcgatggcctccagatgataaatataggatgttataaaa  
catagtatTTTTgaatggTTTTctggacaaggctcgctgcttatggtagcagcaaagcaacgcggtgccgtaaagctaattg  
taatacccagaaattgTTgaatggctgtggaatgta

>Balsas\_USDA PI566686\_AY107535

tctcatcggtaaatgatctcaacatatgtgcagagaatcactgtgcaagtttcgagaccgccacagcattggcttttataa



gctgggttgcgctggcgccatcctgtatcttgaatttctggctcgatggcctccagatgataaatataggatggtataaaa  
catagtatttttgaatgggttctggacaaggctcgctgcttatggtagcagcaaagcaacgcggtgccgtaaagctaattg  
taataccagaaaattggtgaatggctgtggaatgta  
>Jalisco\_INIFAP JSG y MAS 264\_AY107535  
tctcatcggtaatgatctcaacatatgtgcagagaatcactgtgcaagtttcgagaccgccacagcattggctttataa  
gctgggttgcgctggcgccatcctgtatcttgaatttctggctcgatggcctccagatgataaatataggatggtataaaa  
catagtatttttgaatgggttctggacaaggctcgctgcttatggtagcagcaaagcaacgcggtgccgtaaagctaattg  
taataccagaaaattggtgaatggctgtggaatgta  
>Tripsacum\_WW-2120\_AY107535  
tctcattggtaatgatctcaacatatgcgagagaatcactgtgcaagtttcgagactgccacagcattggctttataa  
gctgggttgcgctggcgccatcctgtatcttgaatttctggctcgatggcctccagatgagaaaatataaggatggtataaaa  
catag---ttttgaatgggttctggaca-ggctcgctgcttgtggtagcag-----  
caacgcagtgctcgtaaagctaattgtaataccagaaaattgtggaatggctgtggaatgta

>B73\_AY107529

--

tacaagggcgtggtgttcgcgacgggtgcgcggggtccgggacacatggtaccgatcgaccagccggggccgcggttcgctct  
cttctcgtccttcatcaaggggcagccgctcccccaaggccgcgccgatggtcgacggatgaagagccacgg-----  
-----tcggtgggattccggagtttacccttgtctcgtcaagtaccatgca-  
-----tattgtctccatttccacgtaactacca-gaccgtgtacatactgactaaa-----

>Oh43\_AY107529

-----

aagggcgtggtgttcgcgacgggtgcgcggggtccgggacacatggtaccgatcgaccagccggggccgcggttcgctctctt  
ctcgtccttcatcaaggggcagccgctcccccaaggccgcgccgatggtcgacggatgaagagccacgg-----  
-----tcggtgggattccggagtttacccttgtctcgtcaagtaccatgca----  
---tattgtctccatttccacgtaactacca-gaccgtgtacatactgactaaac----

>IL14H\_AY107529

agtacaagggcgtggtgttcgcgacgggtgcgcggggtccgggacacatggtaccgatcgaccagccggggccgcggttcgct  
ctcttctcgtccttcatcaaggggcagccgctcccccaaggccgcgccgatggtcgacggatgaagagccacgg-----  
-----

tcggtgggattccggagtttacccttgtctcgtcaagtaccatgca-----  
tattgtctccatttccacgtaactacca-gaccgtgtacatactgactaaa-----

>Mo17\_AY107529

-----

aagggcgtggtgttcgcgacgggtgcgcggggtccgggacacatggtaccgatcgaccagccggggccgcggttcgctctctt  
ctcgtccttcatcaaggggcagccgctcccccaaggccgcgccgatggtcgacggatgaagagccacgg-----  
-----tcggtgggattccggagtttacccttgtctcgtcaagtaccatgca----  
---tattgtctccatttccacgtaactacca-gaccgtgtacatactgactaaa-----

>Ky21\_AY107529

-----

aagggcgtggtgttcgcgacgggtgcgcggggtccgggacacatggtaccgatcgaccagccggggccgcggttcgctctctt  
ctcgtccttcatcaaggggcagccgctcccccaaggccgcgccgatggtcgacggatgaagagccacgg-----  
-----tcggtgggattccggagtttacccttgtctcgtcaagtaccatgca----  
---tattgtctccatttccacgtaactacca-gaccgtgtacatactgactaaacgc--

>M37W\_AY107529

agtacaagggcgtggtgttcgcgacgggtgcgcggggtccgggacacatggtaccgatcgaccagccggggccgcggttcgct  
ctcttctcgtccttcatcaaggggcagccgctcccccaaggccgcgccgatggtcgacggatgaagagccacgg-----  
-----

tcggtgggattccggagtttacccttgtctcgtcaagtaccatgca-----  
tattgtctccatttccacgtaactacca-gaccgtgtacatact-----

>HP301\_AY107529

-----

caagggcgtggtgttcgcgacgggtgcgcggggtccgggacacatggtaccgatcgaccagccggggccgcggttcgctctctt  
tctcgtccttcatcaaggggcagccgctcccccaaggccgcgccgatggtcgacggatgaagagccacgg-----  
-----tcggtgggattccggagtttacccttgtctcgtcaagtaccatgca---

----tattgtctccatttccacgttaactacca-gaccgtgtacatact-----  
>CML247\_AY107529  
agtacaagggcgtggtggttcgacgacggtgcgcggggtccgggacacatggtaccgatcgaccagccggggccgcggttcgct  
ctcttctcgtccttcatcaaggggcagccgctcccccaaggccgcgccgatggtcgacggatgaagagccacgg-----  
-----  
tcggtgggattccggagtttcacccttgtctcgtcaagtaccatgca-----  
tattgtctccatttccacgttaactacca-gaccgtgtacatactgactaaacgctc  
>NC350\_AY107529  
-----  
cgtggtggttcgacgacggtgcgcggggtccgggacacatggtaccgatcgaccagccggggccgcggttcgctctcttctcgt  
ccttcatcaaggggcagccgctcccccaaggccgcgccgatggtcgacggatgaagagccacgg-----  
-----tcggtgggattccggagtttcacccttgtctcgtcaagtaccatgca-----  
tattgtctccatttccacgttaactacca-gaccgtgtacatactgactaaacgctc  
>Ki3\_AY107529  
agtacaagggcgtggtggttcgacgacggtgcgcggggtccgggacacatggtaccgatcgaccagccggggccgcggttcgct  
ctcttctcgtccttcatcaaggggcagccgctcccccaaggccgcgccgatggtcgacggatgaagagccacggcagatt  
cacttctcgttacgttcatggagcagccacggtcgttgggattccggagtttcacccttgtctcgtcaagtaccatgca  
a-----tattgtctccatttccacgttaactacca-gaccgtgtacatactgactaaacgctc-  
>Kill\_AY107529  
-----  
aagggcgtggtggttcgacgacggtgcgcggggtccgggacacatggtaccgatcgaccagccggggccgcggttcgctctctt  
ctcgtccttcatcaaggggcagccgctcccccaaggccgcgccgatggtcgacggatgaagagccacgg-----  
-----tcggtgggattccggagtttcacccttgtctcgtcaagtaccatgca-----  
---tattgtctccatttccacgttaactacca-gaccgtgtacatactgactaaa-----  
>CML333\_AY107529  
-----  
gggcgtggtggttcgacgacggtgcgcggggtccgggacacatggtaccgatcgaccagccggggccgcggttcgctctcttct  
cgtccttcatcaaggggcagccgctcccccaaggccgcgccgatggtcgacggatgaagagccacgg-----  
-----tcggtgggattccggagtttcacccttgtctcgtcaagtaccatgca-----  
-tattgtctccatttccacgttaactacca-gaccgtgtacatactgactaaacgctc  
>CML322\_AY107529  
agtacaagggcgtggtggttcgacgacggtgcgcggggtccgggacacatggtaccgatcgaccagccggggccgcggttcgct  
ctcttctcgtccttcatcaaggggcagccgctcccccaaggccgcgccgatggtcgacggatgaagagccacgg-----  
-----  
tcggtgggattccggagtttcacccttgtctcgtcaagtaccatgca-----  
tattgtctccatttccacgttaactacca-gaccgtgtacatactgactaaacgctc  
>CML69\_AY107529  
-----  
gggcgtggtggttcgacgacggtgcgcggggtccgggacacatggtaccgatcgaccagccggggccgcggttcgctctcttct  
cgtccttcatcaaggggcagccgctcccccaaggccgcgccgatggtcgacggatgaagagccacgg-----  
-----tcggtgggattccggagtttcacccttgtctcgtcaagtaccatgca-----  
-tattgtctccatttccacgttaactacca-gaccgtgtacatactgactaaacgctc  
>Assinboine\_PI213793\_AY107529  
agtacaagggcgtggtggttcgacgacggtgcgcggggtccgggacacatggtaccgatcgaccagccggggccgcggttcgct  
ctcttctcgtccttcatcaaggggcagccgctcccccaaggccgcgccgatggtcgacggatgaagagccacgg-----  
-----  
tcggtgggattccggagtttcacccttgtctcgtcaagtaccatgca-----  
tattgtctccatttccacgttaactacca-gaccgtgtacatactgactaaacgctc  
>Gordo\_CHH\_160\_AY107529  
agtacaagggcgtggtggttcgacgacggtgcgcggggtccgggacacatggtaccgatcgaccagccggggccgcggttcgct  
ctcttctcgtccttcatcaaggggcagccgctcccccaaggccgcgccgatggtcgacggatgaagagccacggcagatt  
cacttctcgttacgttcatggagcagccacggtcgttgggattccggagtttcacccttgtctcgtcaagtaccatgca  
a-----tattgtctccatttccacgttaactacca-gaccgtgtacatactgactaaacgctc  
>Guirua\_MAG\_450\_AY107529  
agtacaagggcgtggtggttcgacgacggtgcgcggggtccgggacacatggtaccgatcgaccagccggggccgcggttcgct  
ctcttctcgtccttcatcaaggggcagccgctcccccaaggccgcgccgatggtcgacggatgaagagccacgg-----  
-----

tcgttgggattccggagtttcacccttgtctcgtcaagtcacccatgca-----  
tattgtctccatttccacgttaactacca-gaccgtgtacatactgactaaacgctc  
>Nal-tel\_YUC 7\_AY107529  
agtacaagggcgtgggtgttcgcgacggtgcgcggggtccgggacacatggtaccgatcgaccagccgggcccgggcttcgct  
ctcttctcgtccttcatcaaggggcagccgctcccccaaggccgcgccgatggtcgacggatgaagagccacgg-----  
-----  
tcgttgggattccggagtttcacccttgtctcgtcaagtcacccatgca-----  
tattgtctccatttccacgttaactacca-gaccgtgtacatactgactaaacgctc  
>Pisscotunto\_APC 13\_AY107529  
agtacaagggcgtgggtgttcgcgacggtgcgcggggtccgggacacatggtaccgatcgaccagccgggcccgggcttcgct  
ctcttctcgtccttcatcaaggggcagccgctcccccaaggccgcgccgatggtcgacggatgaagagccacgg-----  
-----  
tcgttgggattccggagtttcacccttgtctcgtcaagtcacccatgca-----  
tattgtctccatttccacgttaactacca-gaccgtgtacatactgactaaacgctc  
>Sabanero\_SAN 329\_AY107529  
agtacaagggcgtgggtgttcgcgacggtgcgcggggtccgggacacatggtaccgatcgaccagccgggcccgggcttcgct  
ctcttctcgtccttcatcaaggggcagccgctcccccaaggccgcgccgatggtcgacggatgaagagccacgg-----  
-----  
tcgttgggattccggagtttcacccttgtctcgtcaagtcacccatgca-----  
tattgtctccatttccacgttaactacca-gaccgtgtacatactgactaaacgctc  
>Serrano\_GUA 14\_AY107529  
agtacaagggcgtgggtgttcgcgacggtgcgcggggtccgggacacatggtaccgatcgaccagccgggcccgggcttcgct  
ctcttctcgtccttcatcaaggggcagccgctcccccaaggccgcgccgatggtcgacggatgaagagccacgg-----  
-----  
tcgttgggattccggagtttcacccttgtctcgtcaagtcacccatgca-----  
tattgtctccatttccacgttaactacca-gaccgtgtacatactgactaaacgctc  
>Zapalote Chico\_OAX 70\_AY107529  
agtacaagggcgtgggtgttcgcgacggtgcgcggggtccgggacacatggtaccgatcgaccagccgggcccgggcttcgct  
ctcttctcgtccttcatcaaggggcagccgctcccccaaggccgcgccgatggtcgacggatgaagagccacgg-----  
-----  
tcgttgggattccggagtttcacccttgtctcgtcaagtcacccatgca-----  
tattgtctccatttccacgttaactacca-gaccgtgtacatactgactaaacgctc  
>Bolita\_OAX 68\_AY107529  
agtacaagggcgtgggtgttcgcgacggtgcgcggggtccgggacacatggtaccgatcgaccagccgggcccgggcttcgct  
ctcttctcgtccttcatcaaggggcagccgctcccccaaggccgcgccgatggtcgacggatgaagagccacggcagtt  
cacttctccggttacggttcatggagcagccacgggtcgttgggattccggagtttcacccttgtctcgtcaagtcacccatgc  
a-----tattgtctccatttccacgttaactacca-gaccgtgtacatactgactaaacgctc  
>Cateto Sulino\_URG 11\_AY107529  
agtacaagggcgtgggtgttcgcgacggtgcgcggggtccgggacacatggtaccgatcgaccagccgggcccgggcttcgct  
ctcttctcgtccttcatcaaggggcagccgctcccccaaggccgcgccgatggtcgacggatgaagagccacgg-----  
-----  
tcgttgggattccggagtttcacccttgtctcgtcaagtcacccatgca-----  
tattgtctccatttccacgttaactacca-gaccgtgtacatactgactaaacgctc  
>Chalqueno\_MEX 48\_AY107529  
agtacaagggcgtgggtgttcgcgacggtgcgcggggtccgggacacatggtaccgatcgaccagccgggcccgggcttcgct  
ctcttctcgtccttcatcaaggggcagccgctcccccaaggccgcgccgatggtcgacggatgaagagccacggcagtt  
cacttctccggttacggttcatggagcagccacgggtcgttgggattccggagtttcacccttgtctcgtcaagtcacccatgc  
a-----tactgtctccatttccacgttaactacca-taccgt--acatactgactaaacgctc  
>Chapalote\_SIN 2\_AY107529  
agtacaagggcgtgggtgttcgcgacggtgcgcggggtccgggacacatggtaccgatcgaccagccgggcccgggcttcgct  
ctcttctcgtccttcatcaaggggcagccgctcccccaaggccgcgccgatggtcgacggatgaagagccacgg-----  
-----  
tcgttgggattccggagtttcacccttgtctcgtcaagtcacccatgca-----  
tattgtctccatttccacgttaactacca-gaccgtgtacatactgactaaacgctc  
>Conico\_PUE 32\_AY107529  
agtacaagggcgtgggtgttcgcgacggtgcgcggggtccgggacacatggtaccgatcgaccagccgggcccgggcttcgct  
ctcttctcgtccttcatcaaggggcagccgctcccccaaggccgcgccgatggtcgacggatgaagagccacgg-----



agtacaagggcggtggtgttcgcgacggtgcgcggggtccggggcacatggtaccgatcgaccagccggggccgcggttcgct  
ctcttctcgtccttcatcaaggggcagccgctcccccaaggccgcgccgatggtcgacggatgaagagccacgg-----

tcgttgggattccggagtttcacccttgtctcgtcaagtaccatgca-----  
tattgtctccatttccacgttaactacca-gaccgtgtacatactgactaaacgctc

>Oaxaca\_INIFAP JSG 197\_AY107529

agtacaagggcggtggtgttcgcgacggtgcgcggggtccggggcacatggtaccgatcgaccagccggggccgcggttcgct  
ctcttctcgtccttcatcaaggggcagccgctcccccaaggccgcgccgatggtcgacggatgaagagccacgg-----

tcgttgggattccggagtttcacccttgtctcgtcaagtaccatgca-----  
tattgtctccatttccacgttaactacca-gaccgtgtacatactgactaaacgctc

>Balsas\_INIFAP JSG y LOS 109\_AY107529

agtacaagggcggtggtgttcgcgacggtgcgcggggtccggggcacatggtaccgatcgaccagccggggccgcggttcgct  
ctcttctcgtccttcatcaaggggcagccgctcccccaaggccgcgccgatggtcgacggatgaagagccacgg-----

tcgttgggattccggagtttcacccttgtctcgtcaagtaccatgca-----  
tattgtctccatttccacgttaactacca-gaccgtgtacatactgactaaacgctc

>Balsas\_INIFAP JSG 378\_AY107529

agtacaagggcggtggtgttcgcgacggtgcgcggggtccggggcacatggtaccgatcgaccagccggggccgcggttcgct  
ctcttctcgtccttcatcaaggggcagccgctcccccaaggccgcgccgatggtcgacggatgaagagccacgg-----

tcgttgggattccggagtttcacccttgtctcgtcaagtaccatgca-----  
tattgtctccatttccacgttaactacca-gaccgtgtacatactgactaaacgctc

>Balsas\_INIFAP JSG 374\_AY107529

agtacaagggcggtggtgttcgcgacggtgcgcggggtccggggcacatggtaccgatcgaccagccggggccgcggttcgct  
ctcttctcgtccttcatcaaggggcagccgctcccccaaggccgcgccgatggtcgacggatgaagagccacgg-----

tcgttgggattccggagtttcacccttgtctcgtcaagtaccatgca-----  
tattgtctccatttccacgttaactacca-gaccgtgtacatactgactaaacgctc

>Balsas\_INIFAP JSG y LOS 161\_AY107529

agtacaagggcggtggtgttcgcgacggtgcgcggggtccggggcacatggtaccgatcgaccagccggggccgcggttcgct  
ctcttctcgtccttcatcaaggggcagccgctcccccaaggccgcgccgatggtcgacggatgaagagccacggcaggtatt  
cacttctccggttacgttcatggagcagccacggtcgttgggattccggagtttcacccttgtctcgtcaagtcatcatgc  
a-----tactgtctccatttccacgttaactacca-taccgt--acatactgactaaacgctc

>Balsas\_USDA PI566686\_AY107529

agtacaagggcggtggtgttcgcgacggtgcgcggggtccggggcacatggtaccgatcgaccagccggggccgcggttcgct  
ctcttctcgtccttcatcaaggggcagccgctcccccaaggccgcgccgatggtcgacggatgaagagccacgg-----

tcgttgggattccggagtttcacccttgtctcgtcaagtaccatgca-----  
tattgtctccatttccacgttaactacca-gaccgtgtacatactgactaaacgctc

>Jalisco\_INIFAP JSG y MAS 264\_AY107529

agtacaagggcggtggtgttcgcgacggtgcgcggggtccggggcacatggtaccgatcgaccagccggggccgcggttcgct  
ctcttctcgtccttcatcaaggggcagccgctcccccaaggccgcgccgatggtcgacggatgaagagccacggcaggtatt  
cacttctccggttacgttcatggagcagccacggtcgttgggattccggagtttcacccttgtctcgtcaagtcatcatgc  
a-----tactgtctccatttccacgttaactacca-taccgt--acatactgactaaacgctc

>B73\_AY107818

tttgccctccaactgaaagctctatggcattggcagcgactccatcgggcccgtggagatgccgagccgtcagtgccagc  
gcactcgacgtgcaaccgtcgccatgtgcgagctggctagtacgtccgggacaggtttctgtac-----  
-----ctgaatcagtttt-----tccg-----

cctcctatagcagcaataaagacgtcagcatttctccattttgttcatcacc-----tacaggg-----  
ccct-ttgtttctttggcaactcttctgcgattcagctgtcactgtt

>Oh43\_AY107818

caacgtgaaagctctatggcattggcagcgactccatcgggcccgtggagatgccgagccgtcagtgccagcgcactcgacg

tgcaaccgctcgccatgtgctggagctggctagtagtccgcccagcaggtttctgtac-----  
ctgaatcagtttt-----tccg-----  
cctcctatagcagcaataaagacgtcagcattttctccattttgttcatcacc-----tacaggg-----  
ccct-ttgtttctttggcaaacctcttctgcgattca-----  
>IL14H\_AY107818

-----  
tggagatgcccagaccgtcagtgccagcgcactcgacgtgcaaccgctcgccatgtgctggagctggctagtagtccgcccagcaggtttctgtac-----  
aggtttctgtac-----ctgaatcagtttt-----tccg-----  
----cctcctatagcagcaataaagacgtcagcattttctccattttgttcatcacc-----tacaggg-----  
-ccct-ttgtttctttggcaaacctcttctgcgattcagctgtcactgt-  
>Mo17\_AY107818

-----  
tccaacgtgaagctctatggcattggcagcgcactccatcggggcgtggagatgcccagaccgtcagtgccagcgcactcga  
cgtgcaaccgctcgccatgtgctggagctggctagtagtccgcccagcaggtttctgtac-----  
ctgaatcagtttt-----tccg-----  
cctcctatagcagcaataaagacgtcagcattttctccattttgttcatcacc-----tacaggg-----  
ccct-ttgtttctttggcaaacctcttctgcgattcagctgtcactgtt  
>Ky21\_AY107818

tttgctctccaacgtgaagctctatggcattggcagcgcactccatcggggcgtggagatgcccagaccgtcagtgccagc  
gcactcgacgtgcaaccgctcgccatgtgctggagctggctagtagtccgcccagcaggtttctgtac-----  
-----ctgaatcagtttt-----tccg-----  
cctcctatagcagcaataaagacgtcagcattttctccattttgttcatcacc-----tacaggg-----  
ccct-ttgtttctttggcaaacctcttctgcgattcagctgtcactgtt  
>M37W\_AY107818

tttgctctccaacgtgaagctctatggcattggcagcgcactccatcggggcgtggagatgcccagaccgtcagtgccagc  
gcactcgacgtgcaaccgctcgccatgtgctggagctggctagtagtccgcccagcaggtttctgtac-----  
-----ctgaatcagtttt-----tccg-----  
cctcctatagcagcaataaagacgtcagcattttctccattttgttcatcacc-ta--caggctacaggg-----  
ccct-ttgtttctttggcaaacctcttctgcgattcagctgtc-----  
>HP301\_AY107818

-----  
caacgtgaagctctatggcattggcagcgcactccatcggggcgtggagatgcccagaccgtcagtgccagcgcactcgacg  
tgcaaccgctcgccatgtgctggagctggctagtagtccgcccagcaggtttctgtac-----  
ctgaatcagtttt-----tccg-----  
cctcctatagcagcaataaagacgtcagcattttctccattttgttcatcacc-ta--caggctacaggg-----  
ccct-ttgtttctttggcaaacctcttctgcgattcagctgtcactgt-  
>CML247\_AY107818

-----  
ccaacgtgaagctctatggcattggcagcgcactccatcggggcgtggagatgcccagaccgtcagtgccagcgcactcgac  
gtgcaaccgctcgccatgtgctggagctggctagtagtccgcccagcaggtttctgtac-----  
ctgaatcagtttt-----tccg-----  
cctcctatagcagcaataaagacgtcagcattttctccattttgttcatcacc-----tacaggg-----  
ccct-ttgtttctttggcaaacctcttctgcgattcagctgtcactgt-  
>NC350\_AY107818

-----  
ccaacgtgaagctctatggcattggcagcgcactccatcggggcgtggagatgcccagaccgtcagtgccagcgcactcgac  
gtgcaaccgctcgccatgtgctggagctggctagtagtccgcccagcaggtttctgtac-----  
ctgaatcagtttt-----tccg-----  
cctcctatagcagcaataaagacgtcagcattttctccattttgttcatcacc-----tacaggg-----  
ccct-ttgtttctttggcaaacctcttctgcgattcagctgtcactgtt  
>Ki3\_AY107818

--  
tgcctctccaacgtgaagctctatggcattggcagcgcactccatcggggcgtggagatgcccagaccgtcagtgccagcgc  
actcgacgtgcaaccgctcgccatgtgctggagctggctagtagtccgcccagcaggtttctgtac-----  
-----ctgaatcagtttt-----tccg-----  
cctcctatagcagcaataaagacgtcagcattttctccattttgttcatcacc-----tacaggg-----  
ccct-ttgtttctttggcaaacctcttctgcgattcagctgtcactgtt

>Kill\_AY107818

tttgccctctccaacgtgaagctctatggcattggcagcgcactccatcggggccgtggagatgccgagccgtcagtggcagc  
gcactcgacgtgcaaccgtcgccatgtgcgagctggctagtagcgtccgggacaggtttctgtac-----  
-----ctgaatcagtttt-----tccg-----  
cctcctatagcagcaataaagacgtcagcattttctccattttgttcatcacc-ta--caggctacaggg-----  
ccct-ttgtttctttggcaaacctcttctgcgattcagctgtc-----

>CML333\_AY107818

tttgccctctccaacgtgaagctctatggcattggcagcgcactccatcggggccgtggagatgccgagccgtcagtggcagc  
gcactcgacgtgcaaccgtcgccatgtgcgagctggctagtagcgtccgggacaggtttctgtac-----  
-----ctgaatcagtttt-----tccg-----  
cctcctatagcagcaataaagacgtcagcattttctccattttgttcatcacc-ta--caggctacaggg-----  
ccct-ttgtttctttggcaaacctcttctgcgattcagctgtcactggt

>CML322\_AY107818

tttgccctctccaacgtgaagctctatggcattggcagcgcactccatcggggccgtggagatgccgagccgtcagtggcagc  
gcactcgacgtgcaaccgtcgccatgtgcgagctggctagtagcgtccgggacaggtttctgtac-----  
-----ctgaatcagtttt-----tccg-----  
cctcctatagcagcaataaagacgtcagcattttctccattttgttcatcacc-----tacaggg-----  
ccct-ttgtttctttggcaaacctcttctgcgattcagctgtcactgt-

>CML69\_AY107818

-----  
tccaacgtgaagctctatggcattggcagcgcactccatcggggccgtggagatgccgagccgtcagtggcagcgcactcga  
cgtgcaaccgtcgccatgtgcgagctggctagtagcgtccgggacaggtttctgtac-----  
ctgaatcagtttt-----tccg-----  
cctcctatagcagcaataaagacgtcagcattttctccattttgttcatcacc-----tacaggg-----  
ccct-ttgtttctttggcaaacctcttctgcgattcagctgtcactgt-

>Assinboine\_PI213793\_AY107818

tttgccctctccaacgtgaagctctatggcattggcagcgcactccatcggggccgtggagatgccgagccgtcagtggcagc  
gcactcgacgtgcaaccgtcgccatgtgcgagctggctagtagcgtccgggacaggtttctgtac-----  
-----ctgaatcagtttt-----tccg-----  
cctcctatagcagcaataaagacgtcagcattttctccattttgttcatcacc-----tacaggg-----  
ccct-ttgtttctttggcaaacctcttctgcgattcagctgtcactggt

>Gordo\_CHH\_160\_AY107818

tttgccctctccaacgtgaagctctatggcattggcagcgcactccatcggggccgtggagatgccgagccgtcagtggcagc  
gcactcgacgtgcaaccgtcgccatgtgcgagctggctagtagcgtccgggacaggtttctgtac-----  
-----ctgaatcagtttt-----tccg-----  
cctcctatagcagcaataaagacgtcagcattttctccattttgttcatcacc-ta--caggctacaggg-----  
ccct-ttgtttctttggcaaacctcttctgcgattcagctgtcactggt

>Guirua\_MAG\_450\_AY107818

-----  
tctccaacgtgaagctctatggcattggcagcgcactccatcggggccgtggagatgccgagccgtcagtggcagcgcactc  
gacgtgcaaccgtcgccatgtgcgagctggctagtagcgtccgggacaggtttctgtac-----  
-ctgaatcagtttt-----tccg-----  
cctcctatagcagcaataaagacgtcagcattttctccattttgttcatcacc-----tacaggg-----  
ccct-ttgtttctttggcaaacctcttctgcgattcagctgtcactggt

>Nal-tel\_YUC\_7\_AY107818

tttgccctctccaacgtgaagctctatggcattggcagcgcactccatcggggccgtggagatgccgagccgtcagtggcagc  
gcactcgacgtgcaaccgtcgccatgtgcgagctggctagtagcgtccgggacaggtttctgtac-----  
-----ctgaatcagtttt-----tccg-----  
cctcctatagcagcaataaagacgtcagcattttctccattttgttcatcacc-----tacaggg-----  
ccct-ttgtttctttggcaaacctcttctgcgattcagctgtcactggt

>Pisscotunto\_APC\_13\_AY107818

tttgccctctccaacgtgaagctctatggcattggcagcgcactccatcggggccgtggagatgccgagccgtcagtggcagc  
gcactcgacgtgcaaccgtcgccatgtgcgagctggctagtagcgtccgggacaggtttctgtac-----  
-----ctgaatcagtttt-----tccg-----  
cctcctatagcagcaataaagacgtcagcattttctccattttgttcatcacc-----tacaggg-----  
ccct-ttgtttctttggcaaacctcttctgcgattcagctgtcactggt

>Sabanero\_SAN\_329\_AY107818

tttgccctctccaacgtgaagctctatggctgtggcagcgcactccatcggggccgtggagatgccgagccgtcagtggcagcgc  
gcactcgacgtgcaaccgtcgccatgtgctggagctggctagtagcgtccgggacaggtttctgtac-----  
-----ctgaatcagtttt-----tccg-----

cctcctatagcagcaataaagacgtcagcatttctccattttgttcatcacc-----tacaggg-----  
cgct-ttgtttctttggcaaactcttctgcgattcagctgtcactggt

>Serrano\_GUA 14\_AY107818

-----

caacgtgaagctctatggcattggcagcgcactccatcggggccgtggagatgccgagccgtcagtggcagcgcactcgacg  
tgcaaccgtcgccatgtgctggagctggctagtagcgtccgggacaggtttctgtac-----  
-----ctgaatcagtttt-----tccg-----

cctcctatagcagcaataaagacgtcagcatttctccattttgttcatcacc-----tacaggg-----  
ccct-ttgtttctttggcaaactcttctgcgattcagctgtcactggt

>Zapalote Chico\_OAX 70\_AY107818

-----

tccaacgtgaagctctatggcattggcagcgcactccatcggggccgtggagatgccgagccgtcagtggcagcgcactcga  
cgtgcaaccgtcgccatgtgctggagctggctagtagcgtccgggacaggtttctgtac-----  
-----ctgaatcagtttt-----tccg-----

cctcctatagcagcaataaagacgtcagcatttctccattttgttcatcacc-ta--caggctacaggg-----  
ccct-ttgtttctttggcaaactcttctgcgattcagctgtcactggt

>Bolita\_OAX 68\_AY107818

tttgccctctccaacgtgaagctctatggcattggcagcgcactccatcggggccgtggagatgccgagccgtcagtggcagcgc  
gcactcgacgtgcaaccgtcgccatgtgctggagctggctagtagcgtccgggacaggtttctgtac-----  
-----ctgaatcagtttt-----tccg-----

cctcctatagcagcaataaagacgtcagcatttctccattttgttcatcacc-----tacaggg-----  
ccct-ttgtttctttggcaaactcttctgcgattcagctgtcactggt

>Cateto Sulino\_URG 11\_AY107818

tttgccctctccaacgtgaagctctatggcattggcagcgcactccatcggggccgtggagatgccgagccgtcagtggcagcgc  
gcactcgacgtgcaaccgtcgccatgtgctggagctggctagtagcgtccgggacaggtttctgtac-----  
-----ctgaatcagtttt-----tccg-----

cctcctatagcagcaataaagacgtcagcatttctccattttgttcatcacc-----tacaggg-----  
ccct-ttgtttctttggcaaactcttctgcgattcagctgtcactggt

>Chalqueno\_MEX 48\_AY107818

-----

tccaacgtgaagctctatggcattggcagcgcactccatcggggccgtggagatgccgagccgtcagtggcagcgcactcga  
cgtgcaaccgtcgccatgtgctggagctggctagtagcgtccgggacaggtttctgtac-----  
-----ctgaatcagtttt-----tccg-----

cctcctatagcagcaataaagacgtcagcatttctccattttgttcatcacc-----tacaggg-----  
ccct-ttgtttctttggcaaactcttctgcgattcagctgtcactggt

>Chapalote\_SIN 2\_AY107818

tttgccctctccaacgtgaagctctatggcattggcagcgcactccatcggggccgtggagatgccgagccgtcagtggcagcgc  
gcactcgacgtgcaaccgtcgccatgtgctggagctggctagtagcgtccgggacaggtttctgtac-----  
-----ctgaatcagtttt-----tccg-----

cctcctatagcagcaataaagacgtcagcatttctccattttgttcatcacc-ta--caggctacaggg-----  
ccct-ttgtttctttggcaaactcttctgcgattcagctgtcactggt

>Costeno\_VEN 453\_AY107818

tttgccctctccaacgtgaagctctatggcattggcagcgcactccatcggggccgtggagatgccgagccgtcagtggcagcgc  
gcactcgacgtgcaaccgtcgccatgtgctggagctggctagtagcgtccgggacaggtttctgtac-----  
-----ctgaatcagtttt-----tccg-----

cctcctatagcagcaataaagacgtcagcatttctccattttgttcatcacc-----tacaggg-----  
ccct-ttgtttctttggcaaactcttctgcgattcagctgtcactggt

>Cristalino Norteno\_CHI 349\_AY107818

-----

tccaacgtgaagctctatggcattggcagcgcactccatcggggccgtggagatgccgagccgtcagtggcagcgcactcga  
cgtgcaaccgtcgccatgtgctggagctggctagtagcgtccgggacaggtttctgtac-----  
-----ctgaatcagtttt-----tccg-----

cctcctatagcagcaataaagacgtcagcatttctccattttgttcatcacc-----tacaggg-----  
ccct-ttgtttctttggcaaactcttctgcgattcagctgtcactggt



>Dzit Bacal\_GUA 131\_AY107818

tttgccctctccaacgtgaagctctatggcattggcagcgcactccatcggggccgtggagatgccgagccgtcagtggcagc  
gcactcgacgtgcaaccgtcgccatgtgcgagctggctagtacgtccgggacaggtttctgtac-----  
-----ctgaatcagtttt-----tccg-----

cctcctatagcagcaataaagacgtcagcattttctccattttgttcatcacc-----tacaggg-----  
ccct-ttgtttctttggcaaactcttctgcgattcagctgtcactggt

>Jalisco\_Benz 967\_AY107818

tttgccctctccaacgtgaagctctatggcattggcagcgcactccatcggggccgtggagatgccgagccgtcagtggcagc  
gcactcgacgtgcaaccgtcgccatgtgcgagctggctagtacgtccgggacaggtttctgtac-----  
-----ctgaatcagtttt-----tccg-----

cctcctatagcagcaataaagacgtcagcattttctccattttgttcatcacc-----tacaggg-----  
ccct-ttgtttctttggcaaactcttctgcgattcagctgtcactggt

>Balsas\_Beadle & Kato Site 4\_AY107818

tttgccctctccaacgtgaagctctatggcattggcagcgcactccatcggggccgtggagatgccgagccgtcagtggcagc  
gcactcgacgtgcaaccgtcgccatgtgcgagctggctagtacgtccgggacaggtttctgtac-----  
-----ctgaatcagtttt-----tccg-----

cctcctatagcagcaataaagacgtcagcattttctccattttgttcatcacc--a--c---ctacaggg-----  
ccct-ttgtttctttggcaaactcttctgcgattcagctgtcactggt

>Balsas\_Kato Site 4\_AY107818

tttgccctctccaacgtgaagctctatggcattggcagcgcactccatcggggccgtggagatgccgagccgtcagtggcagc  
gcactcgacgtgcaaccgtcgccatgtgcgagctggctagtacgtccgggacaggtttctgtac-----  
-----ctgaatcagtttt-----tccg-----

cctcctatagcagcaataaagacgtcagcattttctccattttgttcatcacc-ta--caggctacaggg-----  
ccct-ttgtttctttggcaaactcttctgcgattcagctgtcactggt

>Balsas\_Wilkes Site 6\_AY107818

tttgccctctccaacgtgaagctctatggcattggcagcgcactccatcggggccgtggagatgccgagccgtcagtggcagc  
gcactcgacgtgcaaccgtcgccatgtgcgagctggctagtacgtccgggacaggtttctgtac-----  
-----ctgaatcagtttt-----tccg-----

cctcctatagcagcaataaagacgtcagcattttctccattttgttcatcacc-ta--caggctacaggg-----  
ccct-ttgtttctttggcaaactcttctgcgattcagctgtcactggt

>Balsas\_INIFAP JSP y Lo5130\_AY107818

tttgccctctccaacgtgaagctctatggcattggcagcgcactccatcggggccgtggagatgccgagccgtcagtggcagc  
gcactggacgtgcaaccgtcgccatgtgcgagctggctagtacgtccgggacaggtttctgtac-----  
-----ctgaatcagtttt-----tccg-----

cctcctatagcagcaataaagacgtcagcattttctccattttgttcatcacc-----tacaggg-----  
ccct-ttgtttctttggcaaactcttctgcgattcagctgtcactggt

>Balsas\_INIFAP JSG y LOS 119\_AY107818

tttgccctctccaacgtgaagctctatggcattggcagcgcactccatcggggccgtggagatgccgagccgtcagtggcagc  
gcactcgacgtgcaaccgtcgccatgtgcgagctggctagtacgtccgggacaggtttctgtac-----  
-----ctgaatcagtttt-----tccg-----

cctcctatagcagcaataaagacgtcagcattttctccattttgttcatcacc-----tacaggg-----  
ccct-ttgtttctttggcaaactcttctgcgattcagctgtcactggt

>Jalisco\_INIFAP JSG y MAS 401\_AY107818

tttgccctctccaacgtgaagctctatggcattggcagcgcactccatcggggccgtggagatgccgagccgtcagtggcagc  
gcactcgacgtgcaaccgtcgccatgtgcgagctggctagtacgtccgggacaggtttctgtac-----  
-----ctgaatcagtttt-----tccg-----

cctcctatagcagcaataaagacgtcagcattttctccattttgttcatcacc-----tacaggg-----  
ccct-ttgtttctttggcaaactcttctgcgattcagctgtcactggt

>Balsas\_CIMMYT 8783\_AY107818

tttgccctctccaacgtgaagctctatggctgtggcagcgcactccatcggggccgtggagatgccgagccgtcagtggcagc  
gcactcgacgtgcaaccgtcgccatgtgcgagctggctagtacgtccgggacaggtttctgtac-----  
-----ctgaatcagtttt-----tccg-----

cctcctatagcagcaataaagacgtcagcattttctccattttgttcatcacc-----tacaggg-----  
cgct-ttgtttctttggcaaactcttctgcgattcagctgtcactggt

>Oaxaca\_INIFAP JSG 197\_AY107818

tttgccctctccaacgtgaagctctatggcattggcagcgcactccatcggggccgtggagatgccgagccgtcagtggcagc  
gcactcgacgtgcaaccgtcgccatgtgcgagctggctagtacgtccgggacaggtttctgtac-----

-----ctgaatcagtttt-----tccg-----  
cctcctatagcagcaataaagacgtcagcattttctccattttgttcatcacc-----tacaggg-----  
ccct-ttgtttctttggcaaactcttctgcgattcagctgtcactggt  
>Balsas\_INIFAP JSG 378\_AY107818  
tttgccctctccaacgtgaagctctatggcattggcagcgcactccatcggggccgtggagatgccgagccgtcagtggcagc  
gcactcgacgtgcaaccgtcgccatgtgctggagctggctagtacgtccggggacaggtttctgtac-----  
-----ctgaatcagtttt-----tccg-----  
cctcctatagcagcaataaagacgtcagcattttctccattttgttcatcacc-----tacaggg-----  
ccct-ttgtttctttggcaaactcttctgcgattcagctgtcactggt  
>Balsas\_INIFAP JSG 374\_AY107818  
tttgccctctccaacgtgaagctctatggcattggcagcgcactccatcggggccgtggagatgccgagccgtcagtggcagc  
gcactcgacgtgcaaccgtcgccatgtgctggagctggctagtacgtccggggacaggtttctgtac-----  
-----ctgaatcagtttt-----tccg-----cctcctatagcag-----  
-----catttctccattttgttcatcacc--a--c---ctacaggg-----ccct-  
ttgtttctttggcaaactcttctgcgattcagctgtcactggt  
>Balsas\_INIFAP JSG y LOS 161\_AY107818  
tttgccctctccaacgtgaagctctatggcattggcagcgcactccatcggggccgtggagatgccgagccgtcagtggcagc  
gcactcgacgtgcaaccgtcgccatgtgctggagctggctagtacgtccggggacaggtttctgtac-----  
-----ctgaatcagtttt-----tccg-----  
cctcctatagcagcaataaagacgtcagcattttctccattttgttcatcacc-----tacaggg-----  
ccct-ttgtttctttggcaaactcttctgcgattcagctgtcactggt  
>Balsas\_CIMMYT 11355\_AY107818  
tttgccctctccaacgtgaagctctatggcagtgccagcgcactccatcggggccgtggagatgccgagccgtcagtggcagc  
gcactcgacgtgcaaccgtcgccatgtgctggagctggctagtacgtccggggacaggtttctgtac-----  
-----ctgaatcagtttt-----tccg-----  
cctcctatagcagcaataaagacgtcagcattttctccattttgttcatcacc-----tacaggg-----  
ccct-ttgtttctttggcaaactcttctgcgattcagctgtcactggt  
>Balsas\_USDA PI566686\_AY107818  
tttgccctctccaacgtgaagctctatggcattggcagcgcactccatcggggccgtggagatgccgagccgtcagtggcagc  
gcactcgacgtgcaaccgtcgccatgtgctggagctggctagtacgtccggggacaggtttctgtac-----  
-----ctgaatcagtttt-----tccg-----  
cctcctatagcagcaataaagacgtcagcattttctccattttgttcatcacc-----tacaggg-----  
ccct-ttgtttctttggcaaactcttctgcgattcagctgtcactggt  
>Jalisco\_INIFAP JSG y MAS 264\_AY107818  
tttgccctctccaacgtgaagctctatggcattggcagcgcactccatcggggccgtggagatgccgagccgtcagtggcagc  
gcactcgacgtgcaaccgtcgccatgtgctggagctggctagtacgtccggggacaggtttctgtac-----  
-----ctgaatcagtttt-----tccg-----  
cctcctatagcagcaataaagacgtcagcattttctccattttgttcatcacc-----tacaggg-----  
ccct-ttgtttctttggcaaactcttctgcgattcagctgtcactggt  
>Tripsacum\_WW-2120\_AY107818  
tttgccctctcgaacgtgaagctctacggc---  
ggcagcgcagtgccgtcggggccgtggaggtgccgagccgtcagtggcagcgcctcgcagctgcagccatcgccgtgtgcgga  
gctggctagtacgtccgcgacagggttctgtgctgagctaggtctggttctgcccaggtcgatcttgttccctctccgt  
tttcaggcctaggcatagaaatcgtcctcctatagcagcaataaagacgtcagcattttctccttttcttccactacctta  
ttcatcc-acagggatagtcagcccttttgtttctt-ggcaaactcttctgcgattccgctgtcactggt
