# Supplementary material
Source: PubMed Central journal article supplement (PMC1276015)
Supplement: plntcell_tpc.105.037242_2.pdf [file plntcell_tpc.105.037242_2.pdf]

Supplemental Table 3. Extended sequence alignments in maize inbreds, teosintes and *Tripsacum* at eight candidate genes.

>B73\_AY108876

-----

tgctcgaccatctacatcacaacaagtttctttgggatctcctctttggggaatctacactctctgatgtgctctccaa  
ctttgattcaaatcttgggatcccatacagttcagtcctcaatgatgctgtcagagtgagctatgctgttcacctgatgc  
ttgtgttccccatgatattccatgcattgaggcttaatttggatgggctcctcttcgcctctgcaaggcctctgtctct  
gacaacagaagattcggcataattacagcatcgctcctcctagtgatttttgggctctgcaatcttcattcctagtattg  
ggatgcctttcagtttactggggcaactgctgctgtctgtatcgcccttattttcccagctgcgatcactttaaggtaac  
ttgattctgttaaactcttctctaggtatgtgtaatagcagttcccttcgagcagatttattcaactagtttgttgtac  
ttcttttctagttctagaatgcacattgacctcttagcatgcgacaaatgagaattaagaaaagaatccctgtctgtgg  
ttactcttgagatataatttggattatgactgtagcccatatgacgacacctgatagataagctggattatagtttgt  
atggatttctggattgggtgctgcatgctagttgttgaacgacactttattccggtaacctctaaccgttttac  
ttttggatatacagggattcacaaggtattgccaagaagtgggacaaaattctggcgatcttcattgattgttcttgcgt  
tgtatcaaatgtagtagcggctctacagcgatgcctacaaaatattcaacaaggaaagtgtccttctaagcctggatcg  
gggagtcaactgaaaatagatcttcgtgggtggcttgtacgtagttggccaataaaaatattcatagttcatttaggcttt  
gtttttgggtgatttgttccacgggcatgggtctgctcaaatctcattgagttttgtgtgtatatactacgataggtatgaa  
aatttgcacaaaccgaagtgtcctgggtaccataaaaataattgtgtcaaatctgaaattacagagttacgatcatgatga  
c-----tctttttgaaaa--

>Mo17\_AY108876

-----

tcacaacaagtttctttgggatctcctctttggggaatctacactctctgatgtgctctccaactttgattcaaatctt  
gggatcccatacagttcagtcctcaatgatgctgtcagagtgagctatgctgttcacctgatgcttgtgttccccatgat  
attccatgcattgaggcttaatttggatgggctcctcttcgcctctgcaaggcctctgtctcttgacaacagaagattcg  
gcataattacagcatcgctcctcctagtgatttttgggctctgcaatcttcattcctagtatttgggatgcctttcagttt  
actggggcaactgctgctgtctgtatcgcccttattttcccagctgcgatcactttaaggtaacttgattctgttaaact  
ttctctaggtatgtgtaatagcagttcccttcgagcagatttattcaactagtttgttgtacttcttttctagtctt  
agaatgcacattgacctcttagcatgcgacaaatgagaattaagaaaagaatccctgtctgtgggtactcttgagatata  
tttgttattatgactgtagcccatatgacgacacctgatagataagctggattatagtttgtatggatttctggattg  
gttgcctgatgctagttgttgaacgacactttattccggtaacctctaaccgttttacttttggatatacaggg  
attcacaaggtattgccaagaagtgggacaaaattctggcgatcttcattgattgttcttgcgttgtatcaaatgtagta  
gcggctctacagcgatgcctacaaaatattcaacaaggaaagtgtccttctaagcctggatcggggagtcaactgaaaa  
tagatcttcgtgggtggcttgtacgtagttggccaataaaaatattcatagttcatttaggctttgtttttgggtgatttgt  
tccacgggcatgggtctgctcaaatctcattgagttttgtgtgtatatactacgataggtatgaaaatttgcacaaaccga  
agtgtcctgggtaccataaaaataattgtgtcaaatctgaaattacagagttacgatcatgatgac-----  
tctttttgaaaa--

>Oh43\_AY108876

-----

ctatgctcgaccatctacatcacaacaagtttctttgggatctcctctttggggaatctacactctctgatgtgctctc  
caactttgattcaaatcttgggatcccatacagttcagtcctcaatgatgctgtcagagtgagctatgctgttcacctga  
tgcttgtgttccccatgatattccatgcattgaggcttaatttggatgggctcctcttcgcctctgcaaggcctctgtct  
tctgacaacagaagattcggcataattacagcatcgctcctcctagtgatttttgggctctgcaatcttcattcctagtat  
ttgggatgcctttcagtttactggggcaactgctgctgtctgtatcgcccttattttcccagctgcgatcactttaagg  
aacttgattctgttaaactcttctctaggtatgtgtaatagcagttcccttcgagcagatttattcaactagtttgtt  
tacttcttttctagttctagaatgcacattgacctcttagcatgcgacaaatgagaattaagaaaagaatccctgtctg  
tgggtactcttgagatataatttggattatgactgtagcccatatgacgacacctgatagataagctggattatagtt  
tgtatggatttctggattgggtgctgcatgctagttgttgaacgacactttattccggtaacctctaaccgttt  
tacttttggatatacagggattcacaaggtattgccaagaagtgggacaaaattctggcgatcttcattgattgttcttgc  
tgttgtatcaaatgtagtagcggctctacagcgatgcctacaaaatattcaacaaggaaagtgtccttctaagcctgga  
tcggggagtcaactgaaaatagatcttcgtgggtggcttgtacgtagttggccaataaaaatattcatagttcatttaggc  
tttgtttttgggtgatttgttccacgggcatgggtctgctcaaatctcattgagttttgtgtgtatatactacgataggtat  
gaaaatttgcacaaaccgaagtgtcctgggtaccataaaaataattgtgtcaaatctgaaattacagagtt-----  
-----

>Ky21\_AY108876

-----  
tctacatcacaacaagtttctttgggatatctcctctttgggtgaatctacactctctgatgtgctctccaactttgattca  
aatcttgggatcccatacagttcagtcctcaatgatgctgtcagagtgagctatgctgttcacctgatgcttgtgttccc  
catgatattccatgcattgaggcttaatttgggatgggctcctcttcgcctctgcaaggcctctgtcttctgacaacagaa  
gattcggcataattacagcatcgctcctcctagtgatttttgggtctgcaatcttcattcctagatatttgggatgccttt  
cagtttactggggcaactgctgctgtctgtatcgccctttatcttcccagctgcgatcactttaaggtaacttgattctgt  
taaatctttctctaggtatgtaatagcagttccctctcgagcagatttattcaactagtttgttgtacttcttttct  
agttctagaatgcacattgacctcttagcatgcgacaaaatgagaattaagaaaagaatccctgtctgtgggtactcttga  
gatataatttgttgattatgactgtagcccatatgcagcacacctgatagataagctggattatagtttgtatggatttct  
ggattgggtgctgcatgatgcttagttgttgaacgacactttattccggtaacctctaaccggtttacttttgggtata  
tcagggattcacaaggtattgccaagaagtgggacaaaatctggcgatcttcatgatgttcttggctgtgtatcaaat  
gtagtagcggctacagcagatgacctacaaaatattcaacaaggaaagtgctccttctaagcctggatcggggagtcac  
tgaaaatagatcttcgtgggtgcttgtacgttagttggccaataaaaatattcatagttcatttaggcttggtttgggtg  
atgtgtccacgggcatggctgctcaaatctcattgagtttgggtgtatctacgataggatgaaaatttgcaca  
aaccgaagtgtccggtaccataaaaaataattgtgtcaaatct-----  
-----

>M37W\_AY108876

-----  
agtttctttgggatatctcctctttgggtgaatctacactctctgatgtgctctccaactttgattcaaatcttgggatccc  
atacagttcagtcctcaatgatgctgtcagagtgagctatgctgttcacctgatgcttgtgttccccatgatattccatg  
cattgaggcttaatttgggatgggctcctcttcgcctctgcaaggcctctgtcttctgacaacagaagattcggcataatt  
acagcatcgctcctcctagtgatttttgggtctgcaatcttcattcctagatatttgggatgcctttcagtttactggggc  
aactgctgctgtctgtatcgccctttatcttcccagctgcgatcactttaaggtaacttgattctgttaaatctttctcta  
ggatagttgtaatagcagttccctctcgagcagatttattcaactagtttgttgtacttcttttctagttctagaatgca  
cattgacctcttagcatgcgacaaaatgagaattaagaaaagaatccctgtctgtgggtactcttgagatataatttgttga  
ttatgactgtagcccatatgcagcacacctgatagataagctggattatagtttgtatggatttctggattgggtgctgc  
catgatgcttagttgttgaacgacactttattccggtaacctctaaccggtttacttttgggtatcagggattcaca  
ggattgccaagaagtgggacaaaatctggcgatcttcatgatgttcttggctgtgtatcaaatgtagtagcggctcta  
cagcagatgctacaaaatattcaacaaggaaagtgctccttctaagcctggatcggggagtcacatgaaaatagatctt  
cgtgggtgcttgtacgttagttggccaataaaaatattcatagttcatttaggcttggtttgggtgatttgttccacggg  
ccatggctgctcaaatatcattgagtttgggtgtatctacgataggatgaaaatttgcacaaaccgaagtgtcc  
gggtaccataaaaaataattgtgtc-----  
-----

>KUI11\_AY108876

-----  
gtttctttgggatatctcctctttgggtgaatctacactctctgatgtgctctccaactttgattcaaatcttgggatccc  
tacagttcagtcctcaatgatgctgtcagagtgagctatgctgttcacctgatgcttgtgttccccatgatattccatgc  
attgaggcttaatttgggatgggctcctcttcgcctctgcaaggcctctgtcttctgacaacagaagattcggcataatt  
cagcatcgctcctcctagtgatttttgggtctgcaatcttcattcctagatatttgggatgcctttcagtttactggggca  
actgctgctgtctgtatcgccctttatcttcccagctgcgatcactttaaggtaacttgattctgttaaatctttctctag  
gatagttgtaatagcagttccctctcgagcagatttattcaactagtttgttgtacttcttttctagttctagaatgcac  
attgacctcttagcatgcgacaaaatgagaattaagaaaagaatccctgtctgtgggtactcttgagatataatttgttga  
tatgactgtagcccatatgcagcacacctgatagataagctggattatagtttgtatggatttctggattgggtgctgcc  
atgatgcttagttgttgaacgacactttattccggtaacctctaaccggtttacttttgggtatcagggattcacaag  
gtattgccaagaagtgggacaaaatctggcgatcttcatgatgttcttggctgtgtatcaaatgtagtagcggctcac  
agcagatgctacaaaatattcaacaaggaaagtgctccttctaagcctggatcggggagtcacatgaaaatagatcttc  
gtgggtgcttgtacgttagttggccaataaaaatattcatagttcatttaggcttggtttgggtgatttgttccacgggc  
catggctgctcaaatctcattgagtttgggtgtatctacgataggatgaaaatttgcacaaaccgaagtgtccg  
gtaccataaaaaataattgtgtc-----  
-----

>CML69\_AY108876

-----  
ctatgctcgaccatctacatcacaacaagtttctttgggatatctcctctttgggtgaatctacactctctgatgtgctctc  
caactttgattcaaatcttgggatcccatacagttcagtcctcaatgatgctgtcagagtgagctatgctgttcacctga  
tgcttgtgttccccatgatattccatgcattgaggcttaatttgggatgggctcctcttcgcctctgcaaggcctctgtct

tctgacaacagaagattcggcataattacagcatcgctcctcctagtgatttttgggtctgcaatcttcattcctagtat  
ttgggatgcctttcagtttactggggcaactgctgctgtctgtatcgccctttattttcccagctgcgatcactttaaggt  
aacttgattctgttaaactcttctctaggatagttgtaatagcagttcccttcgagcagatttattcaactagttgttg  
tacttcttttctagttctagaatgcacattgacctcttagcatgcgacaaatgagaattaagaaaagaatccctgtctg  
tggttactcttgagatatatttggttgattatgactgtagcccatatgcagcacacctgatagataagctggattatagtt  
tgtatggatttctggattgggttggctgccatgatgcctagttggttgaacgacactttattccggtaacctctaaccggtt  
tacttttggatatacagggattcacaaggtattgccaagaagtgggacaaaattctggcgatcttcatgattgttcttgc  
tgttgatcaaatgtagtagcggctacagcggatgcctacaaaatattcaacaaggaaagtgtccttctaagctgga  
tcggggagtcactgaaaatagatcttcgtgggtggcttgtacgttagttggccaataaaaatattcatagttcatttaggc  
tttgttttgggtgatttgttccacggggccatggctgctcaaactctcattgagtttgtgtgtatatactacgataggtat  
gaaaatttgcaaaaaccgaagtgtccgggtaccataaaaaataat-----  
-----

>IL14H\_AY108876

-----  
ctatgctcgaccatctacatcacaacaagtttcttggatatactcctcttgggtgaatctacactctctgatgtgctctc  
caactttgattcaaatcttgggatcccatacagttcagtcctcaatgatgctgtcagagtgagctatgctgttcacctga  
tgcttgtgttccccatgatattccatgcattgaggcttaatttggatgggctcctcttcgctctgcaaggcctctgtct  
tctgacaacagaagattcggcataattacagcatcgctcctcctagtgatttttgggtctgcaatcttcattcctagtat  
ttgggatgcctttcagtttactggggcaactgctgctgtctgtatcgccctttattttcccagctgcgatcactttaaggt  
aacttgattctgttaaactcttctctaggatagttgtaatagcagttcccttcgagcagatttattcaactagttgttg  
tacttcttttctagttctagaatgcacattgacctcttagcatgcgacaaatgagaattaagaaaagaatccctgtctg  
tggttactcttgagatatatttggttgattatgactgtagcccatatgcagcacacctgatagataagctggattatagtt  
tgtatggatttctggattgggttggctgccatgatgcctagttggttgaacgacactttattccggtaacctctaaccggtt  
tacttttggatatacagggattcacaaggtattgccaagaagtgggacaaaattctggcgatcttcatgattgttcttgc  
tgttgatcaaatgtagtagcggctacagcggatgcctacaaaatattcaacaaggaaagtgtccttctaagctgga  
tcggggagtcactgaaaatagatcttcgtgggtggcttgtacgttagttggccaataaaaatattcatagttcatttaggc  
tttgttttgggtgatttgttccacggggccatggctgctcaaactctcattgagtttgtgtgtatatactacgataggtat  
gaaaatttgcaaaaaccgaagtgtccgggtaccataaaaaataattgtgtc-----  
-----

>KUI3\_AY108876

-----  
tctacatcacaacaagtttcttggatatactcctcttgggtgaatctacactctctgatgtgctctccaactttgattca  
aatcttgggatcccatacagttcagtcctcaatgatgctgtcagagtgagctatgctgttcacctgatgcttgtgttccc  
catgatattccatgcattgaggcttaatttggatgggctcctcttcgctctgcaaggcctctgtcttctgacaacagaa  
gattcggcataattacagcatcgctcctcctagtgatttttgggtctgcaatcttcattcctagtatttgggatgccttt  
cagtttactggggcaactgctgctgtctgtatcgccctttattttcccagctgcgatcactttaaggtaacttgattctgt  
taaactcttctctaggatagttgtaatagcagttcccttcgagcagatttattcaactagtttgttgtacttcttttct  
agttctagaatgcacattgacctcttagcatgcgacaaatgagaattaagaaaagaatccctgtctgtgggtactcttga  
gatataatttggttgattatgactgtagcccatatgcagcacacctgatagataagctggattatagtttgtatggatttct  
ggattgggttgtgcatgatgcctagttggttgaacgacactttattccggtaacctctaaccggtttacttttgggata  
tcagggattcacaaggtattgccaagaagtgggacaaaattctggcgatcttcatgattgttcttctgtgtgtatcaaat  
gtagtagcggctacagcggatgcctacaaaatattcaacaaggaaagtgtccttctaagctggaatcggggagtcac  
tgaaaatagatcttcgtgggtggcttgtacgttagttggccaataaaaatattcatagttcatttaggcttgttttgggtg  
atttgttccacggggccatggctgctcaaactctcattgagtttgtgtgtatatactacgataggtatgaaaatttgca  
aacgaagtgtccgggtaccataaaaaataattgtgtc-----  
-----

>CML322\_AY108876

-----  
tttcttggatatactcctcttgggtgaatctacactctctgatgtgctctccaactttgattcaaatcttgggatcccat  
acagttcagtcctcaatgatgctgtcagagtgagctatgctgttcacctgatgcttgtgttccccatgatattccatgca  
ttgaggcttaatttggatgggctcctcttcgctctgcaaggcctctgtcttctgacaacagaagattcggcataattac  
agcatcgctcctcctagtgatttttgggtctgcaatcttcattcctagtatttgggatgcctttcagtttactggggcaa  
ctgctgctgtctgtatcgccctttattttcccagctgcgatcactttaaggtaacttgattctgttaaactcttctctagg  
atagttgtaatagcagttcccttcgagcagatttattcaactagtttgttgtacttcttttctagttctagaatgcaca

ttgacctcttagcatgcgacaaatgagaattaagaaaagaatccctgtctgtggttactcttgagatatatttgttgatt  
atgactgtagcccatatgcagcacacctgatagataagctggattatagtttgtatggatttctggattgggtgctgcc  
tgatgcctagttgttgaacgacactttattccggtaacctctaataccgttttacttttgggtatatcagggattcacaagg  
tattgccaaagaagtgggacaaaatctggcgatcttcatgattgttcttggctgtgtatcaaatgtagtagcgggtctaca  
gcgatgcctacaaaatattcaacaaggaaagtgtccttctaatagcctggatcggggagtcaactgaaaatagatcttgc  
tgggtggcttgtacgcttagttggccaataaaaatattcatagttcatttaggctttgttttgggtgatttgttccacggg  
atggctgtctcaaatctcattgagtttgggtgtatctacgataggtatgaaaatttgcacaaaccgaagtgtccgg  
taccataaaaaataattgtgtcaaatctgaaattac-----

>NC350\_AY108876

-----  
agtttcttgggatctcctcttgggtgaatctacactctctgatgtgctctccaactttgattcaaatcttgggatccc  
atacagttcagtcctcaatgatgctgtcagagtgagctatgctgttcacctgatgcttgtgttccccatgatattccatg  
cattgaggcttaatttggatgggctcctcttgcctctgcaaggcctctgtcttctgacaacagaagattcggcataatt  
acagcatcgctcctcctagtgatttttgggtctgcaatcttcatcctagtatcttgggatgcctttcagtttactggggc  
aactgctgctgtctgtatcgctttattttcccagctgcatcactttaaggtaacttgattctgttaaactcttctcta  
ggatagttgtaatagcagttccctctgagcagatttattcaactagtttgttgtacttcttttctagttctagaatgca  
cattgacctcttagcatgcgacaaatgagaattaagaaaagaatccctgtctgtggttactcttgagatatatttgttga  
ttatgactgtagcccatatgcagcacacctgatagataagctggattatagtttgtatggatttctggattgggtgctgc  
catgatgcctagttgttgaacgacactttattccggtaacctctaataccgttttacttttgggtatatcagggattcaca  
ggatattgccaaagaagtgggacaaaatctggcgatcttcatgattgttcttggctgtgtatcaaatgtagtagcgggtcta  
cagcgatgcctacaaaatattcaacaaggaaagtgtccttctaatagcctggatcggggagtcaactgaaaatagatctt  
cgtgggtggcttgtacgcttagttggccaataaaaatattcatagttcatttaggctttgttttgggtgatttgttccacggg  
ccatggctgtctcaaatctcattgagtttgggtgtatctacgataggtatgaaaatttgcacaaaccgaagtgtcc  
gggtaccataaaaaataattgtgtcaaatctgaaattacagagt-----

>HP301\_AY108876

-----  
ctatgctcgaccatctacatcacaacaagtttcttgggatctcctcttgggtgaatctacactctctgatgtgctctc  
caactttgattcaaatcttgggatcccatacagttcagtcctcaatgatgctgtcagagtgagctatgctgttcacctga  
tgcttgtgttccccatgatattccatgcatgaggcttaatttggatgggctcctcttgcctctgcaaggcctctgtct  
tctgacaacagaagattcggcataattacagcatcgctcctcctagtgatttttgggtctgcaatcttcatcctagtat  
ttgggatgcctttcagtttactggggcaactgctgctgtctgtatcgctttattttcccagctgcatcactttaagg  
aacttgattctgttaaactcttctctaggatagttgtaatagcagttccctctgagcagatttattcaactagttgttg  
tacttcttttctagttctagaatgcacattgacctcttagcatgcgacaaatgagaattaagaaaagaatccctgtctg  
tggttactcttgagatatatttgttgattatgactgtagcccatatgcagcacacctgatagataagctggattatagtt  
tgtatggatttctggattgggtgctgcatgatgcctagttgttgaacgacactttattccggtaacctctaataccgttt  
tacttttgggtatatcagggattcacaagggtattgccaagaagtgggacaaaatctggcgatcttcatgattgttcttgc  
tgttgtatcaaatgtagtagcgggtctacagcgatgcctacaaaatattcaacaaggaaagtgtccttctaatagcctgga  
tcggggagtcaactgaaaatagatcttcgtgggtggcttgtacgttagttggccaataaaaatattcatagttcatttaggc  
tttgttttgggtgatttgttccacgggcatgggtctgctcaaatatcattgagtttgggtgtatctacgataggtat  
gaaaatttgcacaaaccgaagtgtccggtaccataaaaaataattgtgtcaaatctgaaattacagagttacgatcatga  
tgac-----tctttttgaaaa--

>CML247\_AY108876

-----  
acatcattgacactatgctcgaccatctacatcacaacaagtttcttgggatctcctcttgggtgaatctacactctc  
tgatgtgctctccaactttgattcaaatcttgggatcccatacagttcagtcctcaatgatgctgtcagagtgagctatg  
ctgttcacctgatgcttgtgttccccatgatattccatgcatgaggcttaatttggatgggctcctcttgcctctgca  
aggcctctgtcttctgacaacagaagattcggcataattacagcatcgctcctcctagtgatttttgggtctgcaatctt  
cattcctagtatcttgggatgcctttcagtttactggggcaactgctgctgtctgtatcgctttattttcccagctgca  
tcactttaaggtaacttgattctgttaaactcttctctaggatagttgtaatagcagttccctctgagcagatttattca  
actagtttgttgtacttcttttctagttctagaatgcacattgacctcttagcatgcgacaaatgagaattaagaaaag  
aatccctgtctgtggttactcttgagatatatttgttgattatgactgtagcccatatgcagcacacctgatagataagc  
tggattatagtttgtatggatttctggattgggtgctgcatgatgcctagttgttgaacgacactttattccggtaacc  
tctaataccgttttacttttgggtatatcagggattcacaagggtattgccaagaagtgggacaaaatctggcgatcttcat  
gattgttcttggctgtgtatcaaatgtagtagcgggtctacagcgatgcctacaaaatattcaacaaggaaagtgtcctt

cta atgcctggatcggggagtc aactgaaaatagatcttcgtgggtggcttgtacgtagttggccaataaaaatattcata  
gttcatttaggctttgttttgggtgatttgttccacggggccatggctctgctcaa atctcattgagttttgtgtgtatct  
tacgataggtatgaaaatttgcacaaaccgaagtgtccgggtaccataaaaaataattgtgtcaa atctgaaattacagag  
ttacgatcatgatgac-----tc-----

>CML333\_AY108876

-----  
ctatgctcgaccatctacatcacaacaagtttctttggatctcctctttgggtgaatctacactctctgatgtgctctc  
caactttgattcaa atcttgggatcccatacagttcagtcctcaatgatgctgtcagagtgagctatgctgttcacctga  
tgcttgtgttccccatgatattccatgcatagggttaatttggatgggctcctcttcgctctgcaaggcctctgtct  
tctgacaacagaagattcgggcataattacagcatcgctcctcctagtgtattttgggtctgcaatcttcattcctagtat  
ttgggatgcctttcagtttactggggcaactgctgctgtctgtatcgcccttattttccagctgcatcactttaagggt  
aacttgattctgttaaa atcttctctaggatagttgta atagcagttcccttcgagcagatttattcaactagttgttg  
tacttcttttctagttctagaatgcacattgacctcttagcatgagcaaa atgagaattaagaaaagaatccctgtctg  
tggttactcttgagatata tttgttgattatgactgtagcccatatgcagcacacctgatagataagctggattatagtt  
tgtatggatttctggattgggtgctgccatgatgcctagttgttgaacgacactttattccggtaacctcta atccgttt  
tacttttggatatacagggattcacaagggtattgccaagaagtgggacaaa atctggcgatcttcattgattgttcttgc  
tgttgtatcaa atgtagtagcgggtctacagcgatgcctacaaa atattcaacaaggaa agtgctccttcta atgcctgga  
tcggggagtc aactgaaa atagatcttcgtgggtggcttgtacgtagttggccaataaaa atattcatagttcatttaggc  
tttgttttgggtgatttgttccacggggccatggctctgctcaa atctcattgagttttgtgtgtatatactacgataggtat  
gaaa atttgcacaa accgaagtgtccgggtaccataaaaa atattgtgtcaa atctgaa atta-----  
-----

>Balsas\_USDA PI566686\_AY108876

-----  
accatctacatcacaacaagtttctttggatctcctctttgggtgaatctacactctctgatgtgctctccaactttga  
ttcaa atcttgggatcccatacagttcagtcctcaatgatgctgtcagagtgagctatgctgttcacctgatgcttgtgt  
tccccatgatattccatgcatagggttaatttggatgggctcctcttcgctctgcaaggcctctgtcttctgacaac  
agaagattcgggcataattacagcatcgctcctcctagtgtattttgggtctgcaatcttcattcctagtatttgggatgc  
ctttcagtttactggggcaactgctgctgtctgtatcgcccttattttccagctgcatcactttaaggtaacttgatt  
ctgttaaa atcttctctaggatagttgta atagcagttcccttcgagcagatttattcaactagttgttacttcttt  
ttctagttctagaatgcacattgacctcttagcatgagcaaa atgagaattaagaaaagaatccctgtctgtgggtactc  
ttgagatata tttgttgattatgactgtagcccatatgcagcacacctgatagataagctggattatagtttgtatggat  
ttctggattgggtgctgccatgatgcctagttgttgaacgacactttattccggtaacatcta atccgttttactttgg  
tatacagggattcacaagggtattgccaagaagtgggacaaa atctggcgatcttcattgattgttcttctgctgttgtatc  
aa atgtagtagcgggtctacagcgatgcctacaaa atattcaacaaggaa agtgctccttcta atgcctggatcggggagtc  
caactgaaa atagatcttcgtgggtggcttgtacgtagttggccaataaaa atattcatagttcatttaggctttgtttt  
gggtgatttgttccacggggccatggctctgctcaa atctcattgagttttgtgtgtatatactacgataggtatgaaa atttg  
caca aa accgaagtgtccgggtaccataaaaa atattgtgtcaa atctgaa attacagagttacgatcatgatgac-----  
tcttttga aaaa--

>Balsas\_Beadle & Kato Site 4\_AY108876

-----  
accatctacatcacaacaagtttctttggatctcctctttgggtgaatctacactctctgatgtgctctccaactttga  
ttcaa atcttgggatcccatacagttcagtcctcaatgatgctgtcagagtgagctatgctgttcacctgatgcttgtgt  
tccccatgatattccatgcatagggttaatttggatgggctcctcttcgctctgcaaggcctctgtcttctgacaac  
agaagattcgggcataattacagcatcgctcctcctagtgtattttgggtctgcaatcttcattcctagtatttgggatgc  
ctttcagtttactggggcaactgctgctgtctgtatcgcccttattttccagctgcatcactttaaggtaacttgatt  
ctgttaaa atcttctctaggatagttgta atagcagttcccttcgagcagatttattcaactagttgttacttcttt  
ttctagttctagaatgcacattgacctcttagcatgagcaaa atgagaattaagaaaagaatccctgtctgtgggtactc  
ttgagatata tttgttgattatgactgtagcccatatgcagcacacctgatagataagctggattatagtttgtatggat  
ttctggattgggtgctgccatgatgcctagttgttgaacgacactttattccggtaacctcta atccgttttactttgg  
tatacagggattcacaagggtattgccaagaagtgggacaaa atctggcgatcttcattgattgttcttctgctgttgtatc  
aa atgtagtagcgggtctacagcgatgcctacaaa atattcaacaaggaa agtgctccttcta atgcctggatcggggagtc  
caactgaaa atagatcttcgtgggtggcttgtacgtagttggccaataaaa atattcatagttcatttaggctttgtttt  
gggtgatttgttccacggggccatggctctgctcaa atctcattgagttttgtgtgtatatactacgataggtatgaaa atttg  
caca aa accgaagtgtccgggtaccataaaaa atattgtgtcaa atctgaa attacagagttacgatcatgatgac-----

tctttttgaaaaa--

>Jalisco\_INIFAP JSG y MAS 264\_AY108876

-----

gaccatctacatcacaacaagtttctttgggatatctcctctttgggtgaatctacactctctgatgtgctctccaactttg  
attcaaatcttgggatcccatacagttcagtcctcaatgatgctgtcagagtgagctatgctgttcacctgatgcttgtg  
tccccatgatattccatgcattgaggettaatttggatgggctcctcttcgctctgcaaggcctctgtcttctgacaa  
cagaagattcggcataattacagcatcgctcctcctagtgatTTTTGGGTCTGCAATCTTCATTCCTAGTATTTGGGATG  
CCTTTCAGTTTACTGGGGCAACTGCTGCTGTCTGTATCGCCTTTATTTCCAGCTGCGATCACTTTAAGGTAACCTGAT  
TCTGTTAAATCTTCTCTAGGATAGTTGTAATAGCAGTTCCTTCGAGCAGATTTATTCAACTAGTTTGTGTACTTCTT  
TTTCTAGTTCTAGAATGCACATTGACCTCTTAGCATGCGACAAATGAGAATTAAGAAAAGAATCCCTGTCTGTGGTTACT  
CTTGAGATATATTTGTTGATTATGACTGTAGCCCATATGTAGCACACCTGATAGATAAGCTGGATTATAGTTTGTATGGA  
TTTCTGGATTGGTTGCTGCCATGATGCTAGTTGTTGAACGACACTTTATTCGGTAACCTCTAATCCGTTTACTTTTG  
GTATATCAGGGATTCACAAGGTATTGCCAAGAAGTGGGACAAAATCTGGCGATCTTCATGATTGTTCTTGCTGTTGTAT  
CAAAATGTAGTAGCGGTCTACAGCGATGCCTACAAAATATTCAACAAGGAAAGTGCTCCTTCTAATGCCTGGATCGGGGAG  
TCAACTGAAAATAGATCTTCGTGGTGGCTGTACGTTAGTTGGCCAATAAAAATATTCAATAGTTTCAATTAAGCTTTGTTT  
TGGTGATTTGTTCCACGGGCCATGGTCTGCTCAAATCTCGTTGAGTTTGTGTGTATATCTACGATAGGTATGAAAATTT  
GCACAAACCGAAGTGCTCCGGTACCATAAAAATAATTGTGTCAAATCTGAAATTACAGAGTTACGATCATGATGAC----  
-tctttttgaaaaa--

>Balsas\_Wilkes Site 6\_AY108876

-----

accatctacatcacaacaagtttctttgggatatctcctctttgggtgaatctacactctctgatgtgctctccaactttga  
ttcaaatcttgggatcccatacagttcagtcctcaatgatgctgtcagagtgagctatgctgttcacctgatgcttgtg  
tccccatgatattccatgcattgaggettaatttggatgggctcctcttcgctctgcaaggcctctgtcttctgacaa  
agaagattcggcataattacagcatcgctcctcctagtgatTTTTGGGTCTGCAATCTTCATTCCTAGTATTTGGGATG  
CTTTCAGTTTACTGGGGCAACTGCTGCTGTCTGTATCGCCTTTATTTCCAGCTGCGATCACTTTAAGGTAACCTGAT  
CTGTTAAATCTTCTCTAGGATAGTTGTAATAGCAGTTCCTTCGAGCAGATTTATTCAACTAGTTTGTGTACTTCTT  
TTCTAGTTCTAGAATGCACATTGACCTCTTAGCATGCGACAAATGAGAATTAAGAAAAGAATCCCTGTCTGTGGTTACT  
TTGAGATATATTTGTTGATTATGACTGTAGCCCATATGTAGCACACCTGATAGATAAGCTGGATTATAGTTTGTATGGA  
TTTCTGGATTGGTTGCTGCCATGATGCTAGTTGTTGAACGACACTTTATTCGGTAACCTCTAATCCGTTTACTTTTG  
TATATCAGGGATTCACAAGGTATTGCCAAGAAGTGGGACAAAATCTGGCGATCTTCATGATTGTTCTTGCTGTTGTATC  
AAATGTAGTAGCGGTCTACAGCGATGCCTACAAAATATTCAACAAGGAAAGTGCTCCTTCTAATGCCTGGATCGGGGAG  
CAACTGAAAATAGATCTTCGTGGTGGCTGTACGTTAGTTGGCCAATAAAAATATTCAATAGTTTCAATTAAGCTTTGTTT  
GGTGATTTGTTCCACGGGCCATGATCTGCTCAAATCTCATTGAGTTTGTGTGTATATCTACGATAGGTATGAAAATTT  
CACAAACCGAAGTGCTCCGGTACCATAAAAATAATTGTGTCAAATCTGAAATTACAGAGTTACGATCATGATGAC----  
-tctttttgaaaaa--

>Balsas\_INIFAP JSG y LOS 119\_AY108876

-----

gaccatctacatcacaacaagtttctttgggatatctcctctttgggtgaatctacactctctgatgtgctctccaactttg  
attcaaatcttgggatcccatacagttcagtcctcaatgatgctgtcagagtgagctatgctgttcacctgatgcttgtg  
tccccatgatattccatgcattgaggettaatttggatgggctcctcttcgctctgcaaggcctctgtcttctgacaa  
cagaagattcggcataattacagcatcgctcctcctagtgatTTTTGGGTCTGCAATCTTCATTCCTAGTATTTGGGATG  
CCTTTCAGTTTACTGGGGCAACTGCTGCTGTCTGTATCGCCTTTATTTCCAGCTGCGATCACTTTAAGGTAACCTGAT  
TCTGTTAAATCTTCTCTAGGATAGTTGTAATAGCAGTTCCTTCGAGCAGATTTATTCAACTAGTTTGTGTACTTCTT  
TTTCTAGTTCTAGAATGCACATTGACCTCTTAGCATGCGACAAATGAGAATTAAGAAAAGAATCCCTGTCTGTGGTTACT  
CTTGAGATATATTTGTTGATTATGACTGTAGCCCATATGTAGCACACCTGATAGATAAGCTGGATTATAGTTTGTATGGA  
TTTCTGGATTGGTTGCTGCCATGATGCTAGTTGTTGAACGACACTTTATTCGGTAACCTCTAATCCGTTTACTTTTG  
GTATATCAGGGATTCACAAGGTATTGCCAAGAAGTGGGACAAAATCTGGCGATCTTCATGATTGTTCTTGCTGTTGTAT  
CAAAATGTAGTAGCGGTCTACAGCGATGCCTACAAAATATTCAACAAGGAAAGTGCTCCTTCTAATGCCTGGATCGGGGAG  
TCAACTGAAAATAGATCTTCGTGGTGGCTGTACGTTAGTTGGCCAATAAAAATATTCAATAGTTTCAATTAAGCTTTGTTT  
TGGTGATTTGTTCCACGGGCCATGGTCTGCTCAAATCTCATTGAGTTTGTGTGTATATCTACGATAGGTATGAAAATTT  
GCACAAACCGAAGTGCTCCGGTACCATAAAAATAATTGTGTCAAATCTGAAATTACAGAGTTACGATCATGATGAC----  
-tctttttgaaaaa--

>Balsas\_INIFAP JSG y LOS 161\_AY108876

-----  
gaccatctacatcacaacaagtttctttgggatatctcctctttgggtgaatctacactctctgatgtgctctccaactttg  
attcaaatcttgggatcccatacagttcagtcctcaatgatgctgtcagagtgagctatgctgttcacctgatgcttgtg  
ttccccatgatattccatgcattgaggcttaatttggatgggctcctcttcgcctctgcaaggcctctgtctctcgacia  
cagaagattcggcataattacagcatcgctcctcctagtgatTTTTGGGTCTGCAATCTTCATTCCTAGTATTTGGGATG  
CCTTTCAGTTTACTGGGGCAACTGCTGCTGTCTGTATCGCCTTTATTTCCAGCTGCGATCACTTTAAGGTAACCTGAT  
TCTGTTAAATCTTCTCTAGGATAGTTGTAATAGCAGTTCCTTCGAGCAGATTTATTCAACTAGTTTGTGTACTTCTT  
TTTCTAGTTC TAGAATGCACATTGACCTCTTAGCATGCGACAAATGAGAATTAAGAAAAGAATCCCTGTCTGTGGTTACT  
CTTGAGATATATTTGTTGATTGACTGTAGCCCATATGCGACACACCTGATAGATAAGCTGGATTATAGTTTGTATGGA  
TTTCTGGATTGGTTGCTGCCATGATGCCTAGTTGTTGAAAGACACTTTATTCGGTAACCTCTAATCCGTTTACTTTTG  
GTATATCAGGGATT CACAAGGTATTGCCAAGAAGTGGGACAAAATCTCGGCGATCTTCATGATGTTCTTGCTGTGTAT  
CAAATGTAGTAGCGGTCTACAGCGATGCCTACAAAATATTCAACAAGGAAAGTGCTCCTCTAATGCCTGGATCGGGGAG  
TCAACTGAAAATAGATCTTCGTGGTGGCTGTACGTTAGTTGGCCAATAAAAATATT CATAGTTCATTTAGGCTTTGTTT  
TGGTGATTTGTTCCACGGGCGATGGTCTGCTCAAATCTCATTGAGTTTGTGTGTATATCTACGATAGGTATGAAAATTT  
GCACAAACCGAAGTGCTCCGGTACCATAAAAATAATTGTGTCAAATCTGAAATTACAGAGTTACGATCATGATGAC----  
-tctttttgaaaa--

>Balsas\_INIFAP JSG y LOS 109\_AY108876

-----  
gaccatctacatcacaacaagtttctttgggatatctcctctttgggtgaatctacactctctgatgtgctctccaactttg  
attcaaatcttgggatcccatacagttcagtcctcaatgatgctgtcagagtgagctatgctgttcacctgatgcttgtg  
ttccccatgatattccatgcattgaggcttaatttggatgggctcctcttcgcctctgcaaggcctctgtctctcgacia  
cagaagattcggcataattacagcatcgctcctcctagtgatTTTTGGGTCTGCAATCTTCATTCCTAGTATTTGGGATG  
CCTTTCAGTTTACTGGGGCAACTGCTGCTGTCTGTATCGCCTTTATTTCCAGCTGCGATCACTTTAAGGTAACCTGAT  
TCTGTTAAATCTTCTCTAGGATAGTTGTAATAGCAGTTCCTTCGAGCAGATTTATTCAACTAGTTTGTGTACTTCTT  
TTTCTAGTTC TAGAATGCACATTGACCTCTTAGCATGCGACAAATGAGAATTAAGAAAAGAATCCCTGTCTGTGGTTACT  
CTTGAGATATATTTGTTGATTGACTGTAGCCCATATGTAGCACACCTGATAGATAAGCTGGATTATAGTTTGTATGGA  
TTTCTGGATTGGTTGCTGCCATGATGCCTAGTTGTTGAAAGACACTTTATTCGGTAACCTCTAATCCGTTTACTTTTG  
GTATATCAGGGATT CACAAGGTATTGCCAAGAAGTGGGACAAAATCTCGGCGATCTTCATGATGTTCTTGCTGTGTAT  
CAAATGTAGTAGCGGTCTACAGCGATGCCTACAAAATATTCAACAAGGAAAGTGCTCCTCTAATGCCTGGATCGGGGAG  
TCAACTGAAAATAGATCTTCGTGGTGGCTGTACGTTAGTTGGCCAATAAAAATATT CATAGTTCATTTAGGCTTTGTTT  
TGGTGATTTGTTCCACGGGCGATGGTCTGCTCAAATCTCATTGAGTTTGTGTGTATATCTACGATAGGTATGAAAATTT  
GCACAAACCGAAGTGCTCCGGTACCATAAAAATAATTGTGTCAAATCTGAAATTACAGAGTTACGATCATGATGAC----  
-tctttttgaaaa--

>Balsas\_Kato Site 4\_AY108876

-----  
gaccatctacatcacaacaagtttctttgggatatctcctctttgggtgaatctacactctctgatgtgctctccaactttg  
attcaaatcttgggatcccatacagttcagttctcaatgatgctgtcagagtgagctatgctgttcacctgatgcttgtg  
ttccccatgatattccatgcattgaggcttaatttggatgggctcctcttcgcctctgcaaggcctctgtctctcgacia  
cagaagattcggcataattacagcatcgctcctcctagtgatTTTTGGGTCTGCAATCTTCATTCCTAGTATTTGGGATG  
CCTTTCAGTTTACTGGGGCAACTGCTGCTGTCTGTATCGCCTTTATTTCCAGCTGCGATCACTTTAAGGTAACCTGAT  
TCTGTTAAATCTTCTCTAGGATAGTTGTAATAGCAGTTCCTTCGAGCAGATTTATTCAACTAGTTTGTGTACTTCTT  
TTTCTAGTTC TAGAATGCACATTGACCTCTTAGCATGCGACAAATGAGAATTAAGAAAAGAATCCCTGTCTGTGGTTACT  
CTTGAGATATATTTGTTGATTGACTGTAGCCCATATGCGACACACCTGATAGATAAGCTGGATTATAGTTTGTATGGA  
TTTCTGGATTGGTTGCTGCCATGATGCCTAGTTGTTGAAAGACACTTTATTCGGTAACCTCTAATCCGTTTACTTTTG  
GTATATCAGGGATT CACAAGGTATTGCCAAGAAGTGGGACAAAATCTCGGCGATCTTCATGATGTTCTTGCTGTGTAT  
CAAATGTAGTAGCGGTCTACAGCGATGCCTACAAAATATTCAACAAGGAAAGTGCTCCTCTAATGCCTGGATCGGGGAG  
TCAACTGAAAATAGATCTTCGTGGTGGCTGTACGTTAGTTGGCCAATAAAAATATT CATAGTTCATTTAGGCTTTGTTT  
TGGTGATTTGTTCCACGGGCGATGGTCTGCTCAAATCTCATTGAGTTTGTGTGTATATCTACGATAGGTATGAAAATTT  
GCACAAACCGAAGTGCTCCGGTACCATAAAAATAATTGTGTCAAATCTGAAATTACAGAGTTACGATCATGATGAC----  
-tctttttgaaaa--

>Balsas\_INIFAP JSG 378\_AY108876

-----  
gaccatctacatcacaacaagtttctttgggatatctcctctttgggtgaatctacactctctgatgtgctctccaactttg  
attcaaatcttgggatcccatacagttcagtcctcaatgatgctgtcagagtgagctatgctgttcacctgatgcttgtg

ttccccatgatattccatgcattgaggcttaatttgggatgggctcctcttcgcctctgcaaggcctctgtcttctgacaa  
cagaagattcggcataattacagcatcgctcctcctagtgatTTTTGGGTCTGCAATCTTCATTCCTAGTATTTGGGATG  
CCTTTCAGTTTACTGGGGCAACTGCTGCTGTCTGTATCGCCTTTATTTCCAGCTGCGATCACTTTAAGGTAACCTGGAT  
TCTGTTAAATCTTCTCTAGGATAGTTGTAATAGCAGTTCCTTCGAGCAGATTTATTCAACTAGTTTGTGTACTTCTT  
TTTCTAGTTCTAGAATGCACATTGACCTCTTAGCATGCGACAAATGAGAATTAAGAAAAGAATCCCTGTCTGTGGTTACT  
CTTGAGATATATTTGTTGATTATGACTGTAGCCCATATGCAGCACACCTGATAGATAAGCTGGATTATAGTTTGTATGGA  
TTTCTGGATTGGTTGCTGCCATGATGCCTAGTTGTTGAACGACACTTTATTCGGTAACCTCTAATCCGTTTACTTTTG  
GTATATCAGGGATTCACAAGGTATTGCCAAGAAGTGGGACAAAATCTGGCGATCTTCATGATTGTTCTTGCTGTTGTAT  
CAAATGTAGTAGCGGTCTACAGCGATGCCTACAAAATATTCACAAGGAAAGTGTCTCTCTAATGCCTGGATCGGGGAG  
TCAACTGAAAATAGATCTTCGTGGTGGCTTGTACGTTAGTTGGCCAATAAAAATATTCATAGTTTCATTTAGGCTTTGTTTT  
TGGTGATTTGTTCCACGGGCCATGGTCTGCTCAAATCTCATTGAGTTTTGTGTGTATATCTACGATAGGTATGAAAATTT  
GCACAAACCGAAGTGTCCGGTACCATAAAAATAATTGTGTCAAATCTGAAATTACAGAGTTACGATCATGATGAC----  
-TCTTTTTGAAAA--

>Balsas\_INIFAP JSG 374\_AY108876

-----  
tcacaacaagtttctttggatatctcctctttggggaatctacactctctgatgtgctctccaactttgattcaaatctt  
gggatcccatacagttcagtcctcaatgatgctgtcagagtgagctatgctgttcacctgatgcttgtgttccccatgat  
attccatgcattgaggcttaatttgggatgggctcctcttcgcctctgcaaggcctctgtcttctgacaacagaagattcg  
gcataattacagcatcgctcctcctagtgatTTTTGGGTCTGCAATCTTCATTCCTAGTATTTGGGATGCCTTTCAGTTT  
ACTGGGGCAACTGCTGCTGTCTGTATCGCCTTTATTTCCAGCTGCGATCACTTTAAGGTAACCTGATTCTGTAAATC  
TTTCTCTAGGATAGTTGTAATAGCAGTTCCTTCGAGCAGATTTATTCAACTAGTTTGTGTACTTCTTTTTCTAGTTCT  
AGAATGCACATTGACCTCTTAGCATGCGACAAATGAGAATTAAGAAAAGAATCCCTGTCTGTGGTTACTCTTGAGATATA  
TTTGTGATTATGACTGTAGCCCATATGCAGCACACCTGATAGATAAGCTGGATTATAGTTTGTATGGATTTCTGGATTG  
GTTGCTGCCATGATGCCTAGTTGTTGAACGACACTTTATTCGGTAACCTCTAATCCGTTTACTTTTGGTATATCAGGG  
ATTCACAAGGTATTGCCAAGAAGTGGGACAAAATCTGGCGATCTTCATGATTGTTCTTGCTGTTGTATCAAATGTAGTA  
GCGGTCTACAGCGATGCCTACAAAATATTCACAAGGAAAGTGTCTCTCTAATGCCTGGATCGGGGAGTCAACTGAAAA  
TAGATCTTCGTGGTGGCTTGTACGTTAGTTGGCCAATAAAAATATTCATAGTTTCATTTAGGCTTTGTTTTGGTGATTTGT  
TCCACGGGCCATGGTCTGCTCAAATCTCATTGAGTTTTGTGTGTATATCTACGATAGGTATGAAAATTTGCACAAACCGA  
AGTGTCCGGTACCATAAAAATAATTGTGTCAAATCTGAAATTACAGAGTTACGATCATGATGAC-----  
TCTTTTTGAAAA--

>Balsas\_INIFAP JSP y Lo5130\_AY108876

-----  
gaccatctacatcacaacaagtttctttggatatctcctctttggggaatctacactctctgatgtgctctccaactttg  
attcaaatcttgggatcccatacagttcagtcctcaatgatgctgtcagagtgagctatgctgttcacctgatgcttgtg  
tccccatgatattccatgcattgaggcttaatttgggatgggctcctcttcgcctctgcaaggcctctgtcttctgacaa  
cagaagattcggcataattacagcatcgctcctcctagtgatTTTTGGGTCTGCAATCTTCATTCCTAGTATTTGGGATG  
CCTTTCAGTTTACTGGGGCAACTGCTGCTGTCTGTATCGCCTTTATTTCCAGCTGCGATCACTTTAAGGTAACCTGGAT  
TCTGTTAAATCTTCTCTAGGATAGTTGTAATAGCAGTTCCTTCGAGCAGATTTATTCAACTAGTTTGTGTACTTCTT  
TTTCTAGTTCTAGAATGCACATTGACCTCTTAGCATGCGACAAATGAGAATTAAGAAAAGAATCCCTGTCTGTGGTTACT  
CTTGAGATATATTTGTTGATTATGACTGTAGCCCATATGCAGCACACCTGATAGATAAGCTGGATTATAGTTTGTATGGA  
TTTCTGGATTGGTTGCTGCCATGATGCCTAGTTGTTGAACGACACTTTATTCGGTAACCTCTAATCCGTTTACTTTTG  
GTATATCAGGGATTCACAAGGTATTGCCAAGAAGTGGGACAAAATCTGGCGATCTTCATGATTGTTCTTGCTGTTGTAT  
CAAATGTAGTAGCGGTCTACAGCGATGCCTACAAAATATTCACAAGGAAAGTGTCTCTCTAATGCCTGGATCGGGGAG  
TCAACTGAAAATAGATCTTCGTGGTGGCTTGTACGTTAGTTGGCCAATAAAAATATTCATAGTTTCATTTAGGCTTTGTTTT  
TGGTGATTTGTTCCACGGGCCATGGTCTGCTCAAATCTCATTGAGTTTTGTGTGTATATCTACGATAGGTATGAAAATTT  
GCACAAACCGAAGTGTCCGGTACCATAAAAATAATTGTGTCAAATCTGAAATTA-----  
-----

>Balsas\_CIMMYT 11355\_AY108876

-----  
accatctacatcacaacaagtttctttggatatctcctctttggggaatctacactctctgatgtgctctccaactttga  
ttcaaatcttgggatcccatacagttcagtcctcaatgatgctgtcagagtgagctatgctgttcacctgatgcttgtg  
tccccatgatattccatgcattgaggcttaatttgggatgggctcctcttcgcctctgcaaggcctctgtcttctgacaac  
agaagattcggcataattacagcatcgctcctcctagtgatTTTTGGGTCTGCAATCTTCATTCCTAGTATTTGGGATGC  
CCTTTCAGTTTACTGGGGCAACTGCTGCTGTCTGTATCGCCTTTATTTCCAGCTGCGATCACTTTAAGGTAACCTGATT



ctgttaaactctttctctaggatagttgtaatagcagttcccttcgagcagatttattcaactagtttggtgtacttcttt  
ttctagttctagaatgcacattgacctcttagcatgcgacaaatgagaattaagaaaataatccctgtctgtgggttactc  
ttgagatatatttggtgattatgactgttagcccatatgcagcacacctgatagataagctggattatagtttatatggat  
ttctggattgggtgctgcatgatgcctagttggttgaacgacaccttattccggtaacctctaataccgttttacttttgg  
tatatcagggattcacaaggtattgccaagaagtgggacaaaattctggcgatcttcatgattggtcttgctgttgtatc  
aaatgtagtagcgggtctacagcgatgcctacaaaatattcaacaaggaaagtgtccttctaatagcctggatcggggagt  
caactgaaaatagatcttcgtgggtggtctgtacggttagttggccaataaaaatattcatagttcatttaggctttgtttt  
gggtgatttgttccacgggcatggtctgctcaaatctcgttgagttttgtgtgtatatctacgataggtatgaaaatttg  
cacaaccgaagtgtccgggtaccataaaaaataattgtgtcaaatctgaaattacagagttacgatcatgatgac-----  
tctttttgaaaa--

>Oaxaca\_INIFAP JSG 197\_AY108876

-----  
accatctacatcacaacaagtttctttggatattcctctttgggtgaatctacactctctgatgtgctctccaactttga  
ttcaaatcttgggatcccatacagttcagtcctcaatgatgctgtcagagtgagctatgctgttcacctgatgcttgtgt  
tccccatgatattccatgcattgaggttaatttggatgggctcctcttcgctctgcaaggcctctgtcttctgacaac  
agaagattcggcataattacagcatcgctcctcctagtgatttttgggtctgcaatcttcattcctagttttgggatgc  
ctttcagtttactggggcaactgctgctgtctgtatcgcttttattttccagctgcatcactttaaggtaacttgatt  
ctgttaaactctttctctaggatagttgtaatagcagttcccttcgagcagatttattcaactagtttggtgtacttcttt  
ttctagttctagaatgcacattgacctcttagcatgcgacaaatgagaattaagaaaagaatccctgtctgtgggttactc  
ttgagatatatttggtgattatgactgttagcccatatgcagcacacctgatagataagctggattatagtttgtatggat  
ttctggattgggtgctgcatgatgcctagttggttgaacgacaccttattccggtaacctctaataccgttttacttttgg  
tatatcagggattcacaaggtattgccaagaagtgggacaaaattctggcgatcttcatgattggtcttgctgttgtatc  
aaatgtagtagcgggtctacagcgatgcctacaaaatattcaacaaggaaagtgtccttctaatagcctggatcggggagt  
caactgaaaatagatcttcgtgggtggtctgtacggttagttggccaataaaaatattcatagttcatttaggctttgtttt  
gggtgatttgttccacgggcatggtctgctcaaatctcattgagttttgtgtgtatatctacgataggtatgaaaatttg  
cacaaccgaagtgtccgggtaccataaaaaataattgtgtcaaatctgaaattacagagttacgatcatgatgac-----  
tctttttgaaaa--

>Balsas\_CIMMYT 8783\_AY108876

-----  
---  
gaatctacactctctgatgtgctctccaactttgattcaaatcttgggatcccatacagttcagtcctcaatgatgctgt  
cagagtgagctatgctgttcacctgatgcttgtgttccccatgatattccatgcattgaggttaatttggatgggctcc  
tcttcgctctgcaaggcctctgtcttctgacaacagaagattcggcataaattacagcatcgctcctcctagtgattttt  
gggtctgcaatcttcattcctagttttgggatgcctttcagtttactggggcaactgctgctgtctgtatcgctttat  
tttccagctgcatcactttaaggtaacttgattctgttaaactcttctctaggatagttgtaatagcagttcccttcg  
agcagatttattcaactagtttggtgtacttcttttctagttctagaatgcacattgacctcttagcatgcgacaaatg  
agaattaagaaaagaatccctgtctgtgggttactcttgagatatatttggtgattatgactgttagcccatatgcagcaca  
cctgatagataagctggattatagtttgtatggatttctggattgggtgctgcatgatgcctagttgttgaacgacact  
ttattccggtaacctctaataccgttttacttttgggtatatcagggattcacaaggtattgccaagaagtgggacaaaatt  
ctggcgatcttcatgattggtcttgctgttgtatcaaatgtagtagcgggtctacagcgatgcctacaaaatattcaaca  
ggaaagtgtccttctaatagcctggatcggggagtcaactgaaaatagatcttcgtgggtggtctgtacgttagttggcca  
ataaaaatattcatagttcatttaggctttgttttgggtgatttgttccacgggcatggtctgctcaaatctcattgaggt  
ttgtgtgtatatctacgataggtatgaaaatttgcaaacaccgaagtgtccgggtaccataaaaaataattgtgtcaaat  
ctgaaattacagagttacgatcatgatgacatgactctttttgaaaa--

>Jalisco\_Benz 967\_AY108876

-----  
gaccatctacatcacaacaagtttctttggatattcctctttgggtgaatctacactctctgatgtgctctccaactttg  
attcaaatcttgggatcccatacagttcagtcctcaatgatgctgtcagagtgagctatgctgttcacctgatgcttgtg  
tccccatgatattccatgcattgaggttaatttggatgggctcctcttcgctctgcaaggcctctgtcttctgacaa  
cagaagattcggcataaattacagcatcgctcctcctagtgatttttgggtctgcaatcttcattcctagttttgggatg  
cctttcagtttactggggcaactgctgctgtctgtatcgcttttattttccagctgcatcactttaaggtaacttgat  
tctgttaaactctttctctaggatagttgtaatagcagttcccttcgagcagatttattcaactagtttggtgtacttctt  
tttctagttctagaatgcacattgacctcttagcatgcgacaaatgagaattaagaaaagaatccctgtctgtgggttact  
cttgagatatatttggtgattatgactgttagcccatatgcagcacacctgatagataagctggattatagtttgtatgga

tttctggattgggttgctgccatgatgcctagttggtgaaagacactttattccggtaacctctaataccgttttacttttg  
gtatatcagggattcacaaggtattgccaagaagtggaacaaaattctggcgatcttcatgattggtctcttgctgtgtat  
caaatgtagtagcgggtctacagcgatgcctacaaaatattcaacaaggaaagtgctccttctaatagcctggatcggggag  
tcaactgaaaatagatcttcggtgggttgctacggttagttggccaataaaaatattcatagttcatttaggctttggttt  
tggtgatttgttccacggggccatgggtctgctcaaatctcattgagttttgtgtgtatatctacgataggatgaaaattt  
gcacaaaccgaagtgctccggtaccataaaaaataattgtgtcaaatctgaaattacagagttacgatcatgatgac----  
-tctttttgaaaa--

>Jalisco\_INIFAP JSG y MAS 401\_AY108876

-----  
tctttggatatctcctctttgggtgaatctacactctctgatgtgctctccaactttgattcaaatcttgggatcccatac  
agttcagtcctcaatgatgctgctcagagtgagctatgctgttcacctgatgcttgtgttccccatgatattccatgcatt  
gaggcttaatttggatgggctcctcttcgctctgcaaggcctctgtcttctgacaacagaagattcggcataattacag  
catcgctcctcctagtgatttttgggtctgcaatcttcattcctagatatttgggatgcctttcagtttactggggcaact  
gctgctgtctgtatcgcctttattttcccagctgcatcactttaaggtaacttgattctgttaaactcttctctaggat  
agttgtaatagcagttcccttcgagcagatatttcaactagtttgttgtacttcttttctagttctagaatgcacatt  
gacctcttagcatgagcaaatgagaattaagaaaagaatccctgtctgtggttactcttgagatataatttgttgattat  
gactgtagcccatatgcagcacacctgatagataagctggattatagtttgtatggatttctggatgggttgcctgcatg  
atgcctagttgttgaagacactttattccggtaacctctaataccgttttacttttgggtatatcagggattcacaaggta  
ttgccaagaagtggaacaaaattctggcgatcttcatgattggttcttgctgtgtatcaaatgtagtagcgggtctacagc  
gatgcctacaaaatattcaacaaggaaagtgctccttctaatagcctggatcggggagtcactgaaaatagatcttcggtg  
gtggcttgtacggttagttggccaataaaaatattcatagttcatttaggctttggttttgggtgatttgttccacgggcat  
ggctgctcaaatctcattgagttttgtgtgtatatctacgataggatgaaaatttgcacaaaccgaagtgctccggta  
ccataaaaa-----

>Tripsacum\_WW-2120\_AY108876

tcaagccaatagtgacacacatcattgacactatgctcgactatctacatcacaacaagtttctttggatatctcctcttt  
gggtgaatctacactctctgatgtgctctccaactttgattcaaatcttgggatcccatacagttcagttctaaatgatgc  
tgtcagagtgagctatgctgttcatcttatgcttctgtgttccccatgatattccatgcattgaggcttaatttggatgggc  
tctcttcgctctgcaaggcctctgtcttctgacaacagaagatttggcataattacagcagtgctcctcctagtgatt  
tttgggtctgcaatcttcattcctagatatttgggatgcggttccagtttactggggcaactgctgctgtctgtatcgcctt  
tattttcccagctgcatcactttaaggtaacttgatgttgttaaactcttctgctaggtatgtaaatagcagttctct  
tctgaggtatttcaactagtttgttgtacttctgttctagttctagaatgcacattgacctcttagcatgtggcaa  
atgagaattaagaaaagaaacctgtctgtggttactct-  
aagatataatttgttgattatgactgtagcccatatgtagcacacctgatagataagctggattataatttgtatggattt  
ctggatgggttgcctgcatgatgttttagttgttgaacaacactttattctggtaacctctaatactgttttacttttggta  
tatcagggatccacaaggcatgccaagaagtggaacaaaattctggcgatcttcatgattggttcttgctgtgtatcaa  
atgtagtagcgggtctacagcgatgcctacaaaatattccacaaggaaagtgctccttctaatagcctgaatcggggagtc  
gctgaaa-  
tagatcttcggtgggttgctacggttagttggccaatataagattcatagttcatttagggctttggttttgatgggttgt  
tccacgggcatgggtctgctcaaatcgcggttagttttgtgtgta--  
tctacgatacggatgaagagttgcacaaactgaagttctccggtaccataaaaaacaattgtgtcaaatctgaaattatag  
agttacgatcatgatgac-----gtttttgaaaaatt

>Tripsacum\_MIA 34597\_haplotype1\_AY108876

tcaagccaatagtgacacacatcattgacactatgctcgactatctacatcacaacaagtttctttggatatctcctcttt  
gggtgaatctacactctctgatgtgctctccaactttgattcaaatcttgggatcccatacagttcagttctaaatgatgc  
tgtcagagtgagctatgctgttcatcttatgcttctgtgttccccatgatattccatgcattgaggcttaatttggatgggc  
tctcttcgctctgcaaggcctctgtcttctgacaacagaagatttggcataattacagcagtgctcctcctagtgatt  
tttgggtctgcaatcttcattcctagatatttgggatgcggttccagtttactggggcaactgctgctgtctgtatcgcctt  
tattttcccagctgcatcactttaaggtaacttgatgttgttaaactcttctgctaggtatgtaaatagcagttctct  
tcgagcggatttcaactagtttgttgtacttctgttctagttctagaatgcacattgacctcttagcatgtggcaa  
atgagaattaagaaaagaaacctgtctgtggttactct-  
aagatataatttgttgattatgactgtagcccatatgtagcacacctgatagataagctggattataatttgtatggattt  
ctggatgggttgcctgcatgatgttttagttgttgaacaacactttattctggtaacctctaatactgttttacttttggta  
tatcagggatccacaaggcatgccaagaagtggaacaaaattctggcgatcttcatgattggttcttgctgtgtatcaa  
atgtagtagcgggtctacagcgatgcctacaaaatattccacaaggaaagtgctccttctaatagcctgaatcggggagtc

gctgaaa-  
tagatcttcggtggcttgtacggttagttggccaataaaagattcatagttcattaggcctttggttttgatgatttgt  
tccacgggcatggtctgctcaaactcgcggttgagttttgtgtgta--  
tctacgatagggatgaagagttgcacaaactgaagttctccggtaccataaaaaacaattggtgtcaaactctgaaattatag  
agttacgatcatgatgac-----gttttgaaaaatt

>Tripsacum\_MIA\_34597\_haplotype2\_AY108876

tcaagccaatagtgacacacatcattgacactatgctcgactatctacatcacaacaagtttctttggatatctcctcttt  
ggtgaatctacactctctgatgtgctctccaactttgattcaaactcttgggatcccatagttcagttctaaatgatgc  
tgtcagagtgagctatgctgttcatcttatgcttgtgttccccatgatattccatgcattgaggcttaatttggatgggc  
tctcttcgcctctgcaaggcctctctctcttgacaacagaagatttggcataattacagcagtgctcctcctagtgatt  
ttgggtctgcaactcttcatctctagtatttgggatgctgttctcagtttactggggcaactgctgctgtctgtatcgcctt  
tattttcccagctgcatcactttaaggtaacttgatggtttaaactcttctgtaggatagttgtaatagcagttctct  
tgcagcggatatttcaactagtttgttgtacttctggttctagttctagaatgcacattgacctcttagcatgtggcaa  
atgagaattaagaaaagaaaccctgtctgtggttactct-  
aagatatatttgttgattatgactgtagcccatatgtagcacacctgatagataagctggattataatttgtatggattt  
ctggattgggtgctgccatgatgttttagttgttgaacaacactttattctggtaacctctaactgttttacttttgga  
tatcagggatccacaaggcattgccaagaagtgggacaaaattctggcgatcttcatgatgttcttctgtgtgtatcaa  
atgtagtagcggctctacagcagatgcctacaaaatattccacaaggaaagtgtccttctaactgcctgaatcggggagtc  
gctgaaa-  
tagatcttcggtggcttgtacggttagttggccaataaaagattcatagttcattaggcctttggttttgatgatttgt  
ttcacgggcatggtctgctcaaactcgcggttgagttttgtgtgta--  
tctacgatagggatgaagagttgcagaaactgaagttctccggtaccataaaaaacaattggtgtcaaactctgaaattatag  
agttacgatcatgatgac-----gttttgaaaaatt

>B73\_AY107195

-----tcttcgaggtgatttgtgctcttccactatgcttgaaaattc----  
-----tagcctttctagattcgtatcta--  
tctcttaattttgatgtaactctgctccagttatgcctaagaaatattctgtgtagttccatttccattt-  
cttagtctcatgctgcttctctcatggtttcttccagggcaaccecaagaggcatctccttaccaccggctggagtgctctt  
gttagctcaaaaagattgggtttctggggatgcatcttcatgaggtacaataacctga-----  
atccctgagcatgataactgaagaggtttgggtgcattttgcacctgtcactcagcttttgggtttatattggggatgaact  
tatataatttatgtactcattatggattacttttctaactaattattgttcttctgaatggcagaggtgaaaatgggtgagcta  
cgggttgggtgtaaggaggtctcatgagacaagtaaatagcatgccgtcatctgtcatatcaagccacagcatgcatcttgg  
agtattggccacagcctcccatgccatctccactggaacctcttttctggttttctacaaaccaaggtttgatg-  
ttgttttgcctttatctatacatatgtctgcagtgcaacttcttattaatggatgtgcaactgtcctg---  
atttgactgtactttctggttgcataatttcaactctggttcaaatttcaaagtcagttctgtactctgcttttagttgtaaa  
caagctttttgattgttagctactgcatccattgagtgatgtcttatcccttgccccttccctttgcaccaaagatacacac  
tatggttgtcctagtttagcattatcgtgtgcatggttttgtttccttcataactcttgcctgctaaactttatgctcctttt  
atgtgttcccagaactagtcgctctgattttattgtgagtgatgcaacaagtaaccttgaagctaagaagcagaaaaatctg  
ttggaatgaggtttaagatgagatttgaaggtgatgatgctcctgaaagaaggtatgatttggactt-  
catctaaacattttatattatgctgggagcaaaaattacatttgtctctggttacaggttcagcggaaacaatcattggcatc  
gggagtttgcgggcaatgtcaaaactctctggtggcagattctgactggagatctctaaaggtaatgatgattttttt--  
ctttgttaaattagtagtgtgctctctgcaa--ctgtgcagagtgattcattatatttattccc--  
atctcccaaatgttaacttaactgaagtttaccaggttcaatgggatgaaccttcatccattcttctgctccagataga  
atctcccatgggaagtggagccactggatgagctaatccacaatcccctcaacctccactaagggctaagcgtccacg  
acccccagcttcaccttgtatgggtttcggaactgccttccaggttttggtaaggagtacagtaaatatttgttatgaaat  
ggttcatctctagaatgctcagttcatggataccataagcattcttggatataaatgtgatgtgctctcctactgtatc  
tgagttcttgtggcattcatgttaggactctggaaatccccaatgaaatcatcctgtacactctcattttcggaaacctca  
acgggctcgagagttatttcttcaatccccagctcaaccttgtcatcttcatcaaatgtcagttttaaattcaaagaatg  
agccgtccatgctaaccagtcagttctactgggtcagcaaggcatacaagagctgactcctgcgctgctagcaccaacaca  
gtcgtaatgaaaagaagcaagagccaagttctgggtggtttagatgtttggaattaatataatgctcagctgaggaaga  
agtattacctgaggttactgctccaggtgttgggttatgagcagactgctgcctctgtagagttgaaactcggataagctct

cacagccatctgatgtcaacaattctgatgccttagcagctagcagtgaaacggtcacctcttgaatcccaaagccggcaa  
gtgaggagctgtaccaaggtgattttatatcac--tactttt-  
ctcatcatgttctgttcttgccttgggttcaactgggtaactgattaatg-  
ttgtgcacacaggtaattatgcaaggaatggcagtaggaagggctgtagacctgacaaagcttagtggttacagcgatct  
ttgccagaagctggaggagatgtttgacatccaggggggagctgggttccacactaaagaaatggcgggtcattttcactg  
atgatgaggatgacatgatgcttggtagatgatccttgggagtaagaaccctttgtctctgtatattaacgagtgcatgt  
tttccattattggaagtccaatccctgtgcaatgcatcttccctcagtgagtttgcaggatggtgaaaaggatttaca  
ttacacatacaggaggcaagaagctgacatccaagtcaaagttaccggtagcagtgacagcagcaagctgagcgct  
gccaactcactgtctgaatgactatgaacaaaaactgcagagtgctaacgtccctctaattttgttatttccatcatttg  
attatgggggtgaatgctcacggttgcctccgtgggctgaag-----  
ttgtggttggcattcaactgccttgagtttggaggcttttgactgccttggcagcatgagcctcctggaagaggcacc  
ctggcatctgcgtgccatttcccatttggctcgtgccgtttggtaggagatccattggcttatttagcagg--  
tccttggttgaagaagaagcggtagctgcaagatggcggtagccttgcctcttctcactacttagctagtaatta  
ggactatgtatgtaataatgtatagtgccatgaagacgcccattgccctggtagtgagggtcccggcatttgtatgaat  
caa-ttggtc-----ggaaattgttacctttagcagcaacgaacctga-  
gggtgtaggggtggccagggtgggagaagttgtatgttcttccagtaacaacttttgtagcaagtgatctgtatatagtcta  
ctgttttaataagca-----  
-----atgttgtcaacttgcg-----

>Mo17\_AY107195

-----aggtgatttggctcttcaactatgcttgaaaattc----  
-----tagccttctagattcgtatcta--  
tctcttaattttgatgtaatctgctccagttatgcctaagaaatattctgtgtagttccatttccattt-  
cttagtctcatgcctgccttctcatgtttcttccagggcaacccaagaggcatctccttaccaccggctggagtgcttt  
gttagctcaaaaagattgggttctggggatgcatcctcatgaggtacaataacctga-----  
atccctgagcatgataactgaagaggttgggtgcattttgcacctgtcactcagcttttgggttataattggggatgaact  
tataatttatgtactcattatggattacttttactaattatgttctctgaatggcagaggtgaaaatggtagctta  
cgggttgggtgtaaggaggctcatgagacaagtaaatagcatgccgtcatctgtcatatacaagccacagcagcattctgg  
agtattggccacagcctcccactgccatctccactggaacctcttctgttttctacaaaaccaaggtttgatg-  
ttgttttgccttctatacatatgtctgcagtgcaacttcttattaatggatgtgcaactgctcgtg--  
atltgactgtactttctgtttgctaaatttcaactctgtttcaaatttcaaagtcaagttctgtactctgcttttagttgtaa  
caagctttttgattgtagctactgcatccattgagtgatgcttattcccttggcccttcccttgcaccaaagatacacac  
tatggttgccttagtttagcattatcgtgtgcatgttttgttctcctacataacttctgctcgttaaacctttatgctcctttt  
atgtgttcccagaactagtcgctctgatthttatgtgagtgatgacaagtagccttgaagctagaagcagaaaatctg  
ttggaatgagggttaagatgagatttgaagggtgatgactcctgaaagaaggtagatttggactt-  
catctaacaattttatattatgctgggagcaaaattacatttctcctgggttacagggttgcagggaacaatcattggcatc  
gggagtttgcgggcaatgtcaaaatctctgtgggcagattctgactggagatctcctaaggtaagtagatthttt--  
ctttgttaaattagtagtgctcctctgcaa-ctgtgcagagtgattcattatattttattccc--  
atctcccaaatgttaactcaaaactgtaagtttaccagggttcaatgggatgaaccttcatccattctcgtccagataga  
atctcaccatgggaagtgaggccactggatgcagctaatccacaatcccctcaacctccactaagggctaagcgtccacg  
acccccagcttcaccttgtatgggttccggaactgcctcagggttttggtaaggagtacagtaatatthgttatgaaatat  
ggttcatcttctagaatgctcagttcatggataccataagcattcttggatagatgagtgatgctctcctactgtatc  
tgagttcttgtggcattcatgttaggactctggaaatccccaatgaaatcatcctgtacactctcattttcggaacctca  
acgggctcgagagttatttcttcaatcccacgtcaaccttctcatcttcaaatgtcagttttaaattcaaagaatg  
agccgtccatgctaaccagtcagttctactggtagcaaggcatacaagagctgactcctgcgctgctagcaccaacaca  
gtcgtaattgaaaagaagcaagagccaagttctgggtgtgtagattgtttggaaatataatagctcagctgaggaaga  
agcattacctgaggttactgctccaggtgttgggtatgagcagactgctgcctctgtagagttgaactcggataagctct  
cacagcatctgatgtcaacaattctgatgccctagcagctagcagtgaaacggttccctcttgaatcccaaagccggcaa  
gtgaggagctgtagcaaggtgattttatatcac--tactttt-  
ctcatcatgttctgttcttgccttgggttcaactgggtaactgattaatg-  
ttgtgcacacaggtaattatgcaaggaatggcagtaggaagggctgtagacctgacaaagcttagtggttacagcgatct  
ttgccagaagctggaggagatgtttgacatccaggggggagctgggttccacactaaagaaatggcgggtcattttcactg  
atgatgaggatgacatgatgcttggtagatgatccttgggagtaagaaccctttgtctctgtatattaacgagtgcatgt  
tttccattattggaagtccaatccctgtgcaatgcatcttccctcagtgagtttgcaggatggtgaaaaggatttaca  
ttacacatacaggaggcaagaagctgacatccaagtcaaagttaccggtagcagtgacagcagcaagctgagcgct  
gccaactcactgtctgaatgactatgaacaaaaactgcagagtgctaacgtccctctaattttgttatttccatcatttg

attatgggggtgaatgctcacgggtgctccgtgggctgaag-----  
ttgtgggtggcattcaactgccttgagtttggaggcttttggactgccttgccagcatgagcctcctggaagaggcacc  
ctggcatctgctgcccatttcccatttggctgcccgtttggtaggagatccattggcttatttagcagg--  
tcctgggttgaagaaagaagcgggtcagctgcaagatggacgggtgccttgccctcttcttcgactacttagctagtaatta  
ggactatgtatgtaatgaatgtatatagtgccattaagacgcccattgcccctggatagggtcccggcatttgtatgaat  
caa-ttgttc-----ggaaattggttaccttttagcagcaacgaacctga-  
gggtgtaggggtggccagggtgggagaagtgtatgtttctttcagtaacaatctttgtgcaagtgatctgtatatagtcta  
ctgttttaataagca-----  
-----atgttgtgcaacttgcg-----

>KUI3\_AY107195

-----ggcacatttttgcagggtgatttgtgctcttcactatgcttgaaaattc----  
-----tagcctttctagattcgtatcta--  
tctcttaattttgatgtaatctgctccagttatgcctaagaaatattctgtgtagttccatttccattt-  
cttagtctcatgcctgccttctcatgtttctttcagggcaaccaagaggcatctccttaccaccggctggagtgcttt  
gttagctcaaaaagattgggtttctggggatgcatcctcatgaggtacaataacctga-----  
atccctgagcatgataactgaagagggttgggtgcattttgcacctgtcactcagcttttgggtttatattggggatgaact  
tatataatttatgtactcattatggattacttttactaattattgttcttctgaatggcagagggtgaaaatgggtgagcta  
cgggttgggtgtaaggaggctcatgagacaagtaaatagcatgcccgtcatctgtcatatcaagccacagcatgcatctgg  
agtattggccacagcctcccatgccatctccactggaacctcttttctgttttctacaaaccaagggtttgatg-  
ttgttttgcctttatctatacatatgtctgcagtgcaacttcttattaatggatgtgcaactgtcctg---  
atttgactgtactttctgtttgctaatttcaactctgtttcaaatttcaaagtcagttctgtactctgctttagttgtaaa  
caagctttttgattgttagctactgcatccattgagtgatgtcttatcccttgccccttccctttgcaccaaagatacacac  
tatggttgtccttagtttagcattatcgtgtgcatgttttgtttccttcataatcttgcctgcctaaactttatgctcctttt  
atgtgttcccagaactagtcgctctgattttattgtgagtgatgcaacaagtcacttgaagctaagaagcagaaaaatctg  
ttggaatgagggttaagatgagatttgaagggtgatgatgctcctgaaagaaggatgatttggactt-  
catctaaacatttttattatgctgggagcaaaaattacatttgtctctgggttacagggttcagcggaaacaatcattggcatc  
gggagtttgcgggcaatgtcaaaatctctgtgggcagattctgactggagatctctaaaggtaatgatgattttttt--  
ctttgttaaattagtagtgctctctgcaa-ctgtgcagagtgattcattatatttattccc--  
atctcccaaatgttaacttaactgtaagttttaccagggttcaatgggagtaaaccttcatccattcttctgctccagataga  
atctcccatgggaagtggagccactggatgcaagtaattccacaatcccctcaacctccactaagggttaagcgtccacg  
acccccagcttcaccttgtatgggtttcggaaactgccttcagggttttggtaaggagtagcaaatatttgttatgaaat  
ggttcatcttctagaatgctcagttcatggataaccataagcattcttggatagatgagtgatgctctcctactgtatc  
tgagttcttgtggcattcatgttaggactctggaaatcccccaattgaaatcatcctgtacactctcattttcggaaacctca  
acgggctcgagagttatttcttcaatccccacgtcaaccttgtcatcttcatcaaatgtcagttttaaattcaaagaatg  
agccgtccatgctaaccagtcagttctactgggtcagcaaggcatacaagagctgactcctgcgctgctagcaccaacaca  
gtcgtaatgaaaagaagcaagagccaagttctgggtggttgtagattgtttggaattaatataatgctcagctgaggaaga  
agtattacctgaggttactgctccagggtgttgggtatgagcagactgctgcctctgtagagttgaaactcggataagctct  
cacagccatctgatgtcaacaattctgatgccctagcagctagcagtgcaacgttcacctcttgaatcccaaagccggcaa  
gtgaggagctgtaccaaggtgattttatcac--tacttttt-  
ctcatcatgttctgttcttgccttgggttcaactgggtaactgattaatg-  
ttgtgcacacaggtaattatgcaaggaatggcagtaggaagggtgtagacctgacaaagcttagtggttacagcgatct  
ttgccagaagctggaggagatgtttgacatccagggggagctgggttccacactaaagaaatggcgggtcattttcactg  
atgatgaggatgacatgatgcttgttggagatgatccttgggagtaagaacctttgtctctgtattaacgagtgcatgt  
tttccattattggaagtcctaatccctgtgcaatgcatcttcttccagtgagttttgcaggatgggtgaaaaggatttaca  
tttacacatacaggaggcaagaagctgacatccaagtcaaagttaccgggttagcagtgacagcagcaagctgagcgt  
gcaactcactgtctgaatgactatgaacaaaaactgcagagtgctaacgtccctctaattttgttatttccatcatttg  
attatgggggtgaatgctcacgggtgctccgtgggctgaag-----  
ttgtgggtggcattcaactgccttgagtttggaggcttttggactgccttgccagcatgagcctcctggaagaggcacc  
ctggcatctgctgcccatttcccatttggctgcccgtttggtaggagatccattggcttatttagcagg--  
tcctgggttgaagaaagaagcgggtcagctgcaagatggacgggtgccttgccctcttcttcgactacttagctagtaatta  
ggactatgtatgtaatgaatgtatatagtgccattaagacgcccattgcccctggatagggtcccggcatttgtatgaat  
caa-ttgttc---ttgttcggaaattggttaccttttagcagcaacgaacctga-  
gggtgtaggggtggccagggtgggagaagtgtatgtttctttcagtaacaatctttgtgcaagtgatctgtatatagtcta  
ctgttttaataagca-----  
-----

-----atgttgtgcaac-----

>KUI11\_AY107195

-----tttttcgaggtgatttgtgctcttcactatgcttgaaaattc----  
-----tagcctttctagattcgtatcta--  
tctcttaattttgatgtaactctgctccagttattgcctaagaaatattctgtgtagttccatttccattt-  
cttagtctcatgcctgccttctcatggtttctttcagggcaaccaagaggcatctccttaccaccggctggagtgtcttt  
gttagctcaaaaagattgggtttctggggatgcattcatcttcatgaggtacaataccctga-----  
atccctgagcatgataactgaagaggtttgggtgcattttgcacctgtcactcagcttttgggtttatattggggatgaact  
tataatattatgtactcattatggattactttctactaattattgttcttctgaatggcagaggtgaaaatggtagct  
cgggttgggtgtaaggaggtctcatgagacaagtaaatagcatgcccgtcatctgtcatatcaagccacagcatgcatcttgg  
agtattggccacagcctcccattgccatctccactggaacctcttttctgttttctacaaccaaggtttgatg-  
ttgttttgcctttatctatacatatgtctgcagtcacttcttattaatggatgtgcaactgtcctg---  
atttgactgtactttctgtttgctaaatttcactctgtttcaaatttcaaagtcagttctgtactctgcttttagttgtaa  
caagctttttgattgttagctactgcatttgagtgtgcttatcccttgccccttctttgcaccaaagatacacac  
tatggttgtcctagtttagcattatcgtgtgcattgtttgtttccttcataatcttgcctcgttaaactttatgctcctttt  
atgtgttcccagaactagtcgctctgattttattgtgagtggaacaagtagccttgaagctaagaagcagaaaaatctg  
ttggaatgaggtttaagatgagatttgaaggtgatgctcctgaaagaaggtatgatttggactt-  
catctaaacattttatattatgctgggagcaaaattacatttgtctctgggttacaggttcagcggaaacaatcattggcatc  
gggagtttgcggcaatgtcaaaatctctgtgggcagattctgactggagatctctaaaggtaatgatgatttttt--  
ctttgttaaatttagtagtgtgctctctgcaa-ctgtgcagagtgattcattatatttattccc--  
atctcccaaatgttaactcaaaactgtaagtttaccaggttcaatgggatgaaccttcatccattcttctcgtccagataga  
atctcaccatgggaagtgaggccactggatgcagctaattccacaatcccctcaacctccactaagggctaagcgtccacg  
acccccagcttcaccttgtatgggtttcggaaactgccttcaggttttggtaaggagtacagtaaatatttgttatgaaat  
ggttcatcttctagaatgctcagttcatggataccataagcattcttggatgaatgtgagtgctctcctactgtatc  
tgagttcttgtggcattcatgttaggactctggaaatcccattgaatcatcctgtacactctcattttcggaaacctca  
acgggctcgagagttatttcttcaatcccacgtcaaccttgtcatcttcatcaaatgtcagtttaattcaaagaatg  
agccgtccatgctaaccagtcagttctactgggtcagcaaggcatacaagagctgactcctgcgctgctagcaccaacaca  
gtcgtaatgaaaagaagcaagagccaagttctgggtggtttagatggtttggaattaatataatgctcagctgaggaaga  
agtattacctgaggttactgctccaggtgttgggtatgagcagactgctgcctctgtagagttgaactcggataagctct  
cacagccatctgatgtcaacaattctgatgccctagcagctagcagtgaaagctcactcttgaatcccaaagcggcaa  
gtgaggagctgtaccaaggtgattttatattcac--tacttttt-  
ctcatcatgttctgttcttgccttgggttactgggtaactgattaatg-  
ttgtgcacacaggttaattatgcaaggaatggcagtaggaagggctgtagacctgacaaagcttagtggtcagcagatct  
ttgccagaagctggaggagatggttgacatccagggggagctgggttccacactaaagaaatggcgggtcattttcactg  
atgatgaggatgacatgatgcttgttggagatgatccttgggagtaagaacctttgtctctgtatataacgagtgcatgt  
tttccattattggaagtccaatccctgtgcaatgcattcttcttcagtgagttttgcaggatgggtgaaaaggatttaca  
tttacacatacaggaggcaagaagctgacatccaagtcaaagttaccgggttagcagtgacagcagcaagctgagcgt  
gcaactcactgtctgaatgactatgaacaaaaactgcagagtgctaacgtccctctaattttgttatttccatcatttg  
attatgggggtgaatgctcacggttgcctcgtgggctgaag-----  
ttgtgggtggcattcaactgccttgagttttggaggcttttggactgccttgccagcatgagcctcctggaagaggcacc  
ctggcatctgcgtgccatttcccatttgttctgctgcccgtttggtaggagatccattggcttatttagcagg--  
tccctgggttgaagaaagaagcggctcagctgcaagatggacgggtgccttgcctcttcttcgactacttagctagtaatta  
ggactatgtatgtaataatgtatataatgctcattaaagacgccatgccctggatagggtcccggcatttgtatgaa  
caa-ttgttc-----ggaaattgttacctttagcagcaacgaacctga-  
gggtgtaggggtggcaggtgggagaagttgtatggttctttcagtaacaatctttgtgcaagtgatctgtatatagtcta  
ctgttttaataagca-----

-----atgttgtgcaacttgcgctc---

>HP301\_AY107195

-----catttttcgaggtgatttgtgctcttcactatgcttgaaaattc----  
-----tagcctttctagattcgtatcta--  
tctcttaattttgatgtaactctgctccagttattgcctaagaaatattctgtgtagttccatttccattt-  
cttagtctcatgcctgccttctcatggtttctttcagggcaaccaagaggcatctccttaccaccggctggagtgtcttt  
gttagctcaaaaagattgggtttctggggatgcattcatcttcatgaggtacaataccctga-----  
atccctgagcatgataactgaagaggtttgggtgcattttgcacctgtcactcagcttttgggtttatattggggatgaact

tatatatattatgtactcattatggattacttttctactaattatttgttcttctgaatggcagaggtgaaaatgggtgagcta  
cgggttgggtgtaaggaggctcatgagacaagtaaatagcatgccgtcatctgtcatatcaagccacagcatgcatcttgg  
agtattggccacagcctcccatgccatctccactggaaccctcttttctgttttctacaaaccaagggtttgatg-  
ttgttttgcctttatctatacatatgtctgcagtgcaacttcttattaatggatgtgcaactgtcctg---  
atlttgactgtacttttctgttttgcctaatttctactctgttttcaaatttcaaagtcagttctgtactctgcttttagttgtaaa  
caagcttttttgattgttagctactgcatccattgagtgatgtcttatcccttgccccttcccttgcaccaaagatacacac  
tatggttgtcctagtttagcattatcgtgtgcatgttttgtttccttcataatcttgcctgcctaaactttatgctcctttt  
atgtgttcccagaactagtcgctctgattttatttgtgagtgatgcaacaagtcacttgaagctaagaagcagaaaaatctg  
ttggaatgaggtttaagatgagatttgaaggtgatgatgctcctgaaagaaggtatgatttggactt-  
catctaaacatttttatttattgctgggagcaaaaattacatttgtctctggttacaggttcagcggaaacaatcattggcatc  
gggagtttgcccggcaatgtcaaaatctctgtgggcagattctgactggagatctctaaaggtaatgatgattttttt---  
ctttgttaaattagtagtgctctctgcaa-ctgtgcagagtgattcattatatttattccc--  
atctcccaaatgttaactctaaactgtaagttttaccaggttcaatgggatgaaccttcatccattcttctgcctcagataga  
atctcccatgggaagtgaggccactggatgcagctaatccacaatcccctcaacctccactaagggctaagcgtccacg  
acccccagcttcaccttgtatgggtttcggaaactgccttcaggttttggtaaggagtacagtaaatatttgttatgaaatat  
ggttcatcttctagaatgctcagttcatggataccataagcattcttggatgatgaatgtgatgtgctctcctactgtatc  
tgagttcttgtggcattcatgttaggactctggaaatcccccaattgaatcatcctgtacactctcattttcggaaacctca  
acgggctcgagagttatttcttcaatccccacgtcaaccttgtcatcttcatcaaatgtcagttttaattcaaagaatg  
agccgtccatgctaaccagtcagttctactggtcagcaaggcatacaagagctgactcctgcgctgctagcaccaacaca  
gtcgtaatgaaaagaagcaagagccaagttctgggtggtttagatgtttggaatataatgctcagctgaggaaga  
agtattacctgaggttactgctccaggtgttgggtatgagcagactgctgcctctgtagagttgaactcggataagctct  
cacagccatctgatgtcaacaattctgatgccctagcagctagcagtgaaacttccctcttgaatcccaaagccggcaa  
gtgaggagctgtaccaaggtgattttatcac--tacttttt-  
ctcatcatgttctgttcttgccttgtgggttcaactgggtaactgattaatg-  
ttgtgcacacaggttaattatgcaaggaatggcagtaggaagggctgtagacctgacaaagcttagtggttacagcgatct  
ttgccagaagctggaggagatgtttgacatccagggggagctgggttccacactaaagaaatggcgggtcattttcactg  
atgatgaggatgacatgatgcttgttggagatgatccttgggagtaagaaccttctgtctctgtatataacgagtgcatgt  
tttccattattggaagtcccaatcccctgtgcaatgcatcttcttccagttagttttgcaggatgggtgaaaaggatttaca  
tttacacatacaggagggcaagaagctgacatccaagtcaaagttaccgggttagcagtgacagcagcaagctgagcgt  
gcaactcactgtctgaatgactatgaacaaaaactgcagagtgcaactcctcctcaattttgttatttccatcatttg  
attatgggggtgaatgctcacgggtgctccgtgggctgaag-----  
ttgtgggtggcattcaactgccttgagttttggaggcttttggactgccttggcagcatgagcctcctggaagaggcacc  
ctggcatctgcgtgccatttcccatttgttctgctgccgtttggtaggagatccattggcttatttagcagg--  
tccctgggttgaagaaagaagcggctcagctgcaagatggacgggtgccttgcctcttcttgcactacttagctagtaatta  
ggactatgtatgtaatgaatgtatataagtgccatgaagacgcccctgcccctggatattgaggtcccggcatttgtatgaat  
caa-ttgttc-----ggaaattgttaccttttagcagcaacgaacctga-  
gggtgtaggggtggccaggtgggagaagttgtatgtttcttccagtaacaatcttgtgcaagtgatctgtatatagtcta  
ctgttttaataagca-----  
-----atgttgtgcaacttgcgctc---

>M37W\_AY107195

-----tccggcacatttttgcaggtgatttgtgctcttccactatgcttgaaaattc----  
-----tagcctttctagattcgtatcta--  
tctcttaattttgatgtaatctgctccagttatgcctaagaaatattctgtgtagttccattttccattt-  
cttagctcatgacctgccttctcatgtttctttcagggcaaccacaagagcctccttaccaccggctggagtgcttt  
gttagctcaaaaagattgggttctggggatgcatctcctcatgaggtacaataacctga-----  
atccctgagcatgataactgaagaggtttgggtgcattttgcacctgtcactcagcttttgggtttatattggggatgaact  
tatataattatgtactcattatggattacttttctactaattatttgttcttctgaatggcagaggtgaaaatgggtgagcta  
cgggttgggtgtaaggaggctcatgagacaagtaaatagcatgccgtcatctgtcatatcaagccacagcatgcatcttgg  
agtattggccacagcctcccatgccatctccactggaaccctcttttctgttttctacaaaccaagggtttgatg-  
ttgttttgcctttatctatacatatgtctgcagtgcaacttcttattaatggatgtgcaactgtcctg---  
atlttgactgtacttttctgttttgcctaatttctactctgttttcaaatttcaaagtcagttctgtactctgcttttagttgtaaa  
caagcttttttgattgttagctactgcatccattgagtgatgtcttatcccttgccccttcccttgcaccaaagatacacac  
tatggttgtcctagtttagcattatcgtgtgcatgttttgtttccttcataatcttgcctgcctaaactttatgctcctttt  
atgtgttcccagaactagtcgctctgattttatttgtgagtgatgcaacaagtcacttgaagctaagaagcagaaaaatctg  
ttggaatgaggtttaagatgagatttgaaggtgatgatgctcctgaaagaaggtatgatttggactt-

catctaaacattttatattatgctgggagcaaaattacatttgtctctgggttacaggttcagcgggaacaatcattggcatc  
gggagtttgccggcaatgtcaaaatctctgtgggcagattctgactggagatctctaaaggtaatgatgatttttt--  
ctttgttaaattagtagtgctctctgcaa-ctgtgcagagtgattcattatattttattccc--  
atctcccaaatgtaaatctaaactgtaagtttaccaggttcaatgggatgaaccttcatccattcttctgctccagataga  
atctcacatgggaagtggagccactggatgcagctaataccacaatcccctcaacctccactaagggttaagcgtccacg  
acccccagcttcaccttgtatgggttccggaactgccttcagggttttggaaggagtacagtaataattgttatgaaat  
ggttcatcttctagaatgctcagttcatggataccataagcattcttggatgaatgtgatgtgctctcctactgtatc  
tgagttcttgtggcattcatgttaggactctggaaatcccctgaatcatcctgtacactctcattttcggaaacctca  
acgggctcgagagttatttcttcaatcccacgtcaaccttgtcatcttcatcaaatgtcagtttaattcaagaatg  
agccgtccatgctaaccagtcagttctactgggtcagcaaggcatacaagagctgactcctgcgctgctagcaccaacaca  
gtcgtaattgaaaagaagcaagagccaagttctgggtggtttagatggtttggaattaatataatgctcagctgaggaaga  
agtattacctgaggttactgctccaggtgttgggtatgagcagactgctgcctctgtagagttgaactcggataagctct  
cacagccatctgatgtcaacaattctgatgccctagcagctagcagtgaaacctcactcttgaatcccaagcggcga  
gtgaggagctgtaccaaggtgattttatcac--tactttt-  
ctcatcatgttctgttcttggcttgggttcaactgggtaactgattaatg-  
ttgtgcacacaggttaattatgcaaggaatggcagtaggaagggtctgtagacctgacaaagcttagtggtcagcgtatc  
ttgccagaagctggaggagatggttgacatccagggggagctgggttccacactaaagaaatggcgggtcattttcactg  
atgatgaggatgacatgatgcttgttggagatgatccttgggagtaagaaccttctgtctctgtatcaacgagtgcatgt  
tttccattattggaagtcccaatcccctgtgcaatgcatcttcttccagtgagttttgcaggatgggtaaaaggatttaca  
tttacacatacaggaggcaagaagctgacatccaagtcaaagttaccgggttagcagtgacagcagcaagctgagcgt  
gcgaactcactgtctgaatgactatgaacaaaaactgcagagtgctaacctcctcctcaattttgttatttccatcattg  
attatgggggtgaatgctcacgggtgctccgtgggctgaag-----  
ttgtgggtggcattcaactgccttgagttttggaggcttttggactgccttggcagcatgagcctcctggaagaggcacc  
ctggcatctgctgcccatttcccatttgttctgctgcccgtttggtaggagatccattggcttatttagcagg--  
tccctgggttgaagaaagaagcggctcagctgcaagatggacgggtgccttgcctcttctcactacttagctagtaatta  
ggactatgtatgtaatgaatgtatataatgctcattaaagacgcccctgctggtattgaggtcccggcatttgtatgaat  
caa-ttgttc-----ggaaattgttacctttagcagcaacgaacctga-  
gggtgtaggggtggcagggtgggagaagttgtatggttcttccagtaacaatcttgtgcaagtgatctgtatatagtcta  
ctgttttaataagca-----  
-----atggtgtgcaacttgcgc-----

>CML69\_AY107195

-----cgaggtgatttgtgctcttccactatgcttgaaaattc-----  
-----tagcctttctagattcgtatcta--  
tctcttaattttgatgtaatctgctccagttatgcctaagaaatattctgtgtagttccatttccattt-  
cttagtctcatgcctgccttctcatgttcttccagggcaacccaagaggcatctccttaccaccggctggagtgcttt  
gtagctcaaaaagattgggttctggggatgcattcatcttcatgaggtacaataacctga-----  
atccctgagcatgataactgaagaggtttgggtgcattttgcacctgtcactcagcttttgggtttatattggggatgaact  
tatataattatgtactcattatggattactttctactaattattgttcttctgaatggcagaggtgaaaatggtagcta  
cgggttgggtgtaaggaggctcatgagacaagtaaatagcatgccgtcatctgtcatatcaagccacagcatgcatcttgg  
agtattggccacagcctcccctgcccctcctcactggaaacctcttttctgttttctacaaaccaaggtttgatg-  
ttgttttgccttctatacatatgtctgcagtgcaacttcttattaatggatgtgcaactgtcctg--  
atgtgactgtactttctgtttgctaatttcaactctgtttcaaatttcaaagtgcagttctgtactctgcttttagttgtaaa  
caagctttttgattgttagctactgcatccattgagtgatgcttatacccttggccccttcttgcaccaaaagatacacac  
tatggttgtcctagtttagcattatcgtgtgcatgttttgtttccttcataatcttgcctcgttaaactttatgctccttt  
atgtgtcccagaactagtcgctctgattttatgtgagtggaacaagtaacctgaagctaagaagcagaaaatctg  
ttggaatgaggtttagatgagattgaaggtgatgctcctgaaagaaggtatgatttggactt-  
catctaaacattttatattatgctgggagcaaaattacatttgcctctgggttacaggttcagcgggaacaatcattggcatc  
gggagtttgccggcaatgtcaaaatctctgtgggcagattctgactggagatctctaaaggtaatgatgatttttt--  
ctttgttaaattagtagtgctctctgcaa-ctgtgcagagtgattcattatattttattccc--  
atctcccaaatgtaaatctaaactgtaagtttaccaggttcaatgggatgaaccttcatccattcttctgctccagataga  
atctcacatgggaagtggagccactggatgcagctaataccacaatcccctcaacctccactaagggttaagcgtccacg  
acccccagcttcaccttgtatgggttccggaactgccttcagggttttggaaggagtacagtaataattgttatgaaat  
ggttcatcttctagaatgctcagttcatggataccataagcattcttggatgaatgtgatgtgctctcctactgtatc  
tgagttcttgtggcattcatgttaggactctggaaatcccctgaatcatcctgtacactctcattttcggaaacctca  
acgggctcgagagttatttcttcaatcccacgtcaaccttgtcatcttcatcaaatgtcagtttaattcaagaatg



agccgtccatgctaaccagtcagttctactgggtcagcaaggcatacaagagctgactcctgcgctgctagcaccaacaca  
gtcgtaattgaaaagaagcaagagccaagttctgggtggtttagatgtttggaattaatatatgctcagctgaggaaga  
agtattacctgaggttactgctccaggtgttgggtatgagcagactgctgcctctgtagagttgaactcggataagctct  
cacagccatctgatgtcaacaattctgatgccctagcagctagcagtgaaacgttcacctcttgaatcccaaagccggcaa  
gtgaggagctgtaccaaggtgattttatatcac--tacttttt-  
ctcatcatgttctgttcttggcttgtgggttcaactgggtaactgattaatg-  
ttgtgcacacaggttaattatgcaaggaatggcagtaggaagggctgtagacctgacaaagcttagtggctacagcgatct  
ttgccagaagctggaggagatgtttgacatccagggggagctgggttccacactaaagaaatggcgggtcattttcactg  
atgatgaggatgacatgatgcttgttggagatgatccttgggagtaagaacccttctgtctctgtattaacgagtgcatgt  
tttccattattggaagtcctaactcctgtgcaatgcatcttccctcagtgagtttgcaggatgggtaaaaggatttaca  
tttacacatacaggaggcaagaagctgacatccaagtcaaagttaccgggttagcagtgacagcagcaagctgagcgct  
gcaactcactgtctgaatgactatgaacaaaaactgcagagtgctaacgtccctctaattttggtattttccatcatttg  
attatgggggtgaatgctcacgggtgctccgtgggtgag--  
ttgtgggtggcattcaactgcttggagtttggaggctttggactgccttggcagcatgagcctcctggaagaggcacc  
ctggcatctgcgtgccatttcccatttgttctgctgccgttggtaggagatccattggcttatttagcagg--  
tccctgggttgaagaaagaagcggctcagctgcaagatggacggctgccttgcctcttctcactacttagctagtaatta  
ggactatgtatgtaatgatatagtgccattaagacgcccctgcccgggtattgaggtcccggcatttgtatgaa  
caa-ttgttc-----ggaaattgttacctttagcagcaacgaacctga-  
gggtgtaggggtggccaggtgggagaagttgtatgttcttccagtaacaactcttgtgcaagtgatctgtatatagtcta  
ctgttttaataagca-----  
-----  
-----atgttgtgcaacttgcgctc---

>IL14H\_AY107195

-----tcttctcgaggtgatttgtgctcttcaactatgcttgaaaattc----  
-----tagcctttctagattcgtatcta--  
tctcttaattttgatgtaatctgctccagttatgcctaagaaatattctgtgtagttccatttccattt-  
cttagtctcatgctgccttctcatgttcttccagggcaaccaagagcatctccttaccaccggctggagtgcttt  
gttagctcaaaaagattgggttctggggatgcatcctcatgaggtacaataccctga-----  
atccctgagcatgataactgaagaggttgggtgcatttgcactgtcactcagcttttgggtttatatggggatgaact  
tatataattatgtactcattatggattacttctactaattattgttcttctgaatggcagaggtgaaaatgggtgagcta  
cgggttgggtgtaaggaggtcatgagacaagtaaatagcatgccgtcatctgtcatatcaagccacagcatgcatctgg  
agtattggccacagcctcccatgccatctccactggaaccctcttcttctgttttctacaaaccaaggtttgatg-  
ttgttttgcctttatctatacatatgtctgcagtgcaacttcttattaatggatgtgcaactgtcctg--  
atctgactgtacttctgtttgctaatttcaactctgtttcaaatttcaaagtcagttctgtactctgcttttagttgtaaa  
caagctttttgattgttagctactgcatccattgagtgatgtcttatcccttggcccttcccttgcaccaaagatacacac  
tatgggtgtccttagtttagcattatcgtgtgcatgttttggtttccctcataactctgctcgctaaactttatgctcctttt  
atgtgttcccagaactagtcgctctgattttattgtgagtgatgacaagtaaccttgaagctaagaagcagaaaatatctg  
ttggaatgaggtttaagatgagatttgaaggtgatgctcctgaaagaaggtatgatttggactt-  
catctaacaattttatattatgctgggagcaaaaattacatttgtctctgggttacaggttcagcggaaacaatcattggcatc  
gggagtttggcggcaatgtcaaaatctctgtgggcagattctgactggagatctctaaggtaatgatgatttttt--  
ctttgttaaattagtagtgctctctgcaa-ctgtgcagagtgattcattatattttattccc--  
atctcccaaattgtaacttaactgtaagtttaccaggttcaatgggatgaaccttcatccattcttctgctccagataga  
atctcaccatgggaagtgagccactggatgagcctaataccacaatcccctcaacctccactaagggttaagcgtccacg  
acccccagcttcaccttgtatgggttccggaactgccttcaaggttttggtaaggagtagcagtaataattgttatgaaat  
gggtcatcttctagaatgctcagttcatggataccataagcattcttggatgaatgtgatgtgctctcctactgtatc  
tgagttcttgtggcattcatgttaggactctggaaatcccccaattgaatcatcctgtacactctcatttccggaacctca  
acgggctcgagagttatttcttcaatccccacgtcaaccttctcatcttcaaatgtcagttttaaattcaaagaatg  
agccgtccatgctaaccagtcagttctactggtcagcaaggcatacaagagctgactcctgcgctgctagcaccaacaca  
gtcgtaattgaaaagaagcaagagccaagttctgggtggtttagatgtttggaattaatatatgctcagctgaggaaga  
agtattacctgaggttactgctccaggtgttgggtatgagcagactgctgcctctgtagagttgaactcggataagctct  
cacagccatctgatgtcaacaattctgatgccctagcagctagcagtgaaacgttcacctcttgaatcccaaagccggcaa  
gtgaggagctgtaccaaggtgattttatatcac--tacttttt-  
ctcatcatgttctgttcttggcttgtgggttcaactgggtaactgattaatg-  
ttgtgcacacaggttaattatgcaaggaatggcagtaggaagggctgtagacctgacaaagcttagtggctacagcgatct  
ttgccagaagctggaggagatgtttgacatccagggggagctgggttccacactaaagaaatggcgggtcattttcactg  
atgatgaggatgacatgatgcttgttggagatgatccttgggagtaagaacccttctgtctctgtattaacgagtgcatgt

tttccattattggaagtcctaatccctgtgcaatgcatcttcccttcagtgagttttgcaggatgggtaaaaggatttaca  
tttacacatacaggaggcaagaagctgacatccaagtcagggttagcagtgacagcagcaagctgagcgc  
gcgaactcactgtctgaatgactatgaacaaaaactgcagagtgctaacgtccctctaattttgttatttccatcatttg  
attatgggggtgaatgctcacgggtgctccgtgggctgaag-----  
ttgtgggtggcattcaactgccttgagttttggaggcttttggactgccttgccagcatgagcctcctggaagaggcacc  
ctggcatctgctgcccatttcccatttggctgcccgtttggtaggagatccattggcctatttagcagg--  
tccctgggttgaagaaagaagcggctcagctgcaagatggacggctgccttgccctcttctcgactacttagctagtaatta  
ggactatgtatgtaatgaatgtatatagtgccattaagacgcccattgcccggattgaggtcccggcatttgtatgaat  
caa-ttgttc-----ggaaattggttacctttagcagcaacgaacctga-  
gggtgtaggggtggccagggtgggagaagtgtatggttcttccagtaacaatcttgtgcaagtgatctgtatatagtcta  
ctgttttaataagca-----  
-----atggtgtgcaacttgccg-----

>Oh43\_AY107195

-----tttttcgagggtgatttgtgctcttcactatgcttgaaaattc-----  
-----tagcctttctagattcgtatcta--  
tctcttaattttgatgtaatctgctccagttatgccaagaatattctgtgtagttccatttccattt-  
cttagtctcatgctgccttctcatggttcttccagggcaacccaagaggcatctccttaccaccgggctggagtgcttt  
gttagctcaaaaagattgggttctggggatgcatcctcatgaggtacaataccctga-----  
atccctgagcatgataactgaagaggtttgggtgcatttgcacctgctcactcagcttttgggtttatattggggatgaact  
tatataattatgtactcattatggattactttctactaattattgttcttctgaatggcagaggtgaaaatggtagta  
cgggttgggtgtaaggaggctcatgagacaagtaaatagcatgcccgtcatctgtcatatcaagccacagcatgcatcttg  
agtattggccacagcctcccatgccatctccactggaacctcttttctgttttctacaaaccaagggtttgatg-  
ttgttttgcctttatctatacatatgtctgcagtgcaacttcttattaatggatgtgcaactgtcctg--  
atgtgactgtactttctgtttgctaatttcaactctgtttcaaatttcaaagtcagttctgtactctgctttagttgtaaa  
caagctttttgatgtgtagctactgcatccattgagtgatgcttcttcccttgccccttcccttgcaccaaaagatacacac  
tatggttgtcctagtttagcattatcgtgtgcatggtttgtttccttcataatcttgctcgctaaactttatgctcctttt  
atgtgttcccagaactagtcgctctgattttattgtgagtggaacaagtaacctgaagctaaagaagcaaaaatctg  
ttggaatgaggtttaagatgagattggaagtgatgctcctgaaagaaggtatgatttggactt-  
catcctaacttttattatgctgggagcaaaattacatttctctggttacaggttcagcggcaacaatcattggcatc  
gggagtttgcggcaatgtcaaaatctctgtgggagattctgactggagatctcctaaggtaagatgatttttt--  
ctttgttaaattagtagtgctctctgcaa-ctgtgcagagtgattcattatatttattccc--  
atctcccaaatgtaacttaactgtaagtttaccagggttcaatgggatgaaccttcatccattcttctgctccagataga  
atctcaccatgggaagtgaggccactggatgcagctaatccacaatcccctcaacctccactaagggttaagcgtccacg  
acccccagcttccacttgtatgggttccggaactgccttcagggtttggtaaggagtagcaataatttggttatgaaat  
gggttcatcttctagaatgctcagttcatggataccataagcattcttggatataatgtgatgctctcctactgtatc  
tgagttcttgtggcattcatgtaggactctggaaatcccctgaatcatcctgtacactctcatttccggaacctca  
acgggctcgagagttatttcttcaatcccacgtcaaccttgtcatcttcatcaaatgtcagtttcaatcaagaatg  
agccgtccatgctaaccagtcagttctactggctcagcaaggcatacaagagctgactcctgctgctgtagcaccaca  
gtcgtaatgaaaagaagcaagagccaagttctgggtgggtgtgagattggttggaaatataatgctcagctgaggaaga  
agtattacctgaggttactgctccaggtgttgggttatgagcagactgctgcctctgtagagttgaaactcggataagctct  
cacagccatctgatgtcaacaattctgatgcccctagcagctagcagtgaaagcttccactcttgaatcccaaagccggca  
gtgaggagctgtaccaaggtgattttatatac--tactttt-  
ctcatcatgttctgttcttgccttgggttcaactgggtaactgattaatg-  
ttgtgcacacaggtaattatgcaaggaatggcagtaggaagggtgtagacctgacaaagcttagtggtacagcgtatct  
ttgccagaagctggaggagatggttgacatccagggggagctgggttccacactaaagaaatggcgggctatttctactg  
atgatgaggatgacatgcttgttggagatgcttggggagtaagaaccttctctctgtatatacagagtgatgct  
tttccattattggaagtcctaactcctgtgcaatgcatcttccctcagtgagtttgcaggatgggtaaaaggatttaca  
tttacacatacaggaggcaagaagctgacatccaagtcagggttagcagtgacagcagcaagctgagcgc  
gcgaactcactgtctgaatgactatgaacaaaaactgcagagtgctaacgtccctctaattttgttatttccatcatttg  
attatgggggtgaatgctcacgggtgctccgtgggctgaag-----  
ttgtgggtggcattcaactgccttgagttttggaggcttttggactgccttgccagcatgagcctcctggaagaggcacc  
ctggcatctgctgcccatttcccatttggctgcccgtttggtaggagatccattggcctatttagcagg--  
tccctgggttgaagaaagaagcggctcagctgcaagatggacggctgccttgccctcttctcgactacttagctagtaatta  
ggactatgtatgtaatgaatgtatatagtgccattaagacgcccattgcccggattgaggtcccggcatttgtatgaat  
caa-ttgttc-----ggaaattggttacctttagcagcaacgaacctga-

gggtgtagggtggccaggtgggagaagtgtgatgtttctttcagtaacaatctttgtgcaagtgatctgtatatagtcta  
ctgttttaataagca-----  
-----atggttgca-----

>NC350\_AY107195

-----tttcgaggtgatttgtgctcttcactatgcttgaaaattc-----  
-----tagcctttctagattcgtatcta--  
tctcttaattttgatgtaatctgctccagttatgcctaagaaatattctgtgtagttccatttccattt-  
cttagtctcatgacctgcttctcatgtttctttcagggcaaccaagaggcatctcttaccacggctggagtgtcttt  
gttagctcaaaaagattgggtttctggggatgcatcctcatgaggtacaataacctga-----  
atccctgagcatgataactgaagaggtttgggtgcattttgcacctgtcactcagcttttgggtttatatggggatgaact  
tatataatttatgtactcattatggattactttctactaattattgttcttctgaatggcagaggtgaaaatgggtgagcta  
cgggttgggtgtaaggaggtcatgagacaagtaaatagcatgccgtcatctgtcatatcaagccacagcatgcatcttgg  
agtattggccacagcctcccatgccatctccactggaacctcttttctgttttctacaaaccaaggtttgatg-  
ttgttttgcctttatctatacatatgtctgcagtgcaacttcttattaatggatgtgcaactgtcctg---  
atctgactgtactttctgtttgctaatttctactctgtttcaaatttcaaagtcagttctgtactctgcttttagttgtaaa  
caagctttttgattgttagctactgcatccattgagtgatgtcttatcccttggcccttctttgcaccaagatacacac  
tatgggtgtccttagtttagcattatcgtgtgcatgttttggtttcttataatcttgcctgcgtaaacctttatgctcctttt  
atgtgttcccagaactagtcgctctgattttattgtgagtggaacaagtccttgaagctaagaagcagaaaatatctg  
ttggaatgaggtttaagatgagatttgaaggtgatgatgctcctgaaagaaggtatgatttggactt-  
catctaaacattttatattatgctgggagcaaaaattacatttgtctctgggttacaggttcagcggacaacatcattggcatc  
gggagtttggcggcaatgtcaaaatctctgtgggagattctgactggagatctctaaaggtaatgatgatttttt--  
ctttgttaaatttagtagtgctctctgcaa-ctgtgcagagtgattcattatattttattccc--  
atctcccaaatgtaaatctaaactgtaagtttaccaggttcaatgggatgaaccttcatccattcttctgctccagataga  
atctcaccatgggaagtggagccactggatgcagctaataccacaatcccctcaacctccactaagggtgaagcgtccacg  
acccccagcttccacttgtatgggtttcggaaactgcttccaggttttggtaaggagtacagtaataatttgttatgaaatat  
ggttcatcttctagaatgctcagttcatggataccataagcattcttggatgaatgtgatgtgctctcctactgtatc  
tgagttcttgtggcattcatgttaggactctggaaatccccaatgaatcatcctgtacactctcattttcggaaacctca  
acgggctcgagagttatttcttcaatccccacgtcaacctgtcatcttcatcaaatgtcagttttaaattcaaagaatg  
agcgcctccatgtaaccagtcagttctactggtcagcaaggcatacaagagctgactcctgctgctagcaccaca  
gtcgtaatgaaaagaagcaagaccaggttctgggtgggttgtagattgtttggaattaatataatgctcagctgaggaaga  
agtattacctgaggttactgctccaggtgttgggttatgagcagactgctgcctctgtagagttgaactcggataagctct  
cacagccatctgatgtcaacaattctgatgccctagcagctagcagtgaaagcttccctcttgaatcccaaagcggcaa  
gtgaggagctgtaccaaggtgattttatatcac--tacttttt-  
ctcatcatgttctgttcttctgcttgtgggttactgggtaactgattaatg-  
ttgtgcacacaggttaattatgcaaggaatggcagtaggaagggctgtagacctgacaaagcttagtggttacagcgatct  
ttgccagaagctggaggagatgtttgacatccagggggagctgggttccacactaaagaaatggcgggtcattttcactg  
atgatgaggatgacatgatgcttgttggagatgatccttgggagtaagaaccttctgtctctgtatnaacgagtgcatgt  
tttccattatggaaagctcctaatccctgtgcaatgcatcttcttccagtgagttttgcaggatgggtgaaaaggatttaca  
tttacacatacagggaggcaagaagctgacatccaagtcacaagttaccgggttagcagtgacagcagcaagctgagcgt  
gcaactcactgtctgaatgactatgaacaaaaactgcagagtgctaactcctcctaattttgttatttccatcatttg  
attatgggggtgaatgctcacggttgcctcgtgggctgaag-----  
ttgtgggtggcattcaactgctttagttttggaggcttttggactgcttggcagcatgagcctcctggaagaggcacc  
ctggcatctgctgcccatttcccatttgttctgctgcccgtttggtaggagatccattggcttatttagcagg--  
tccctgggttgaagaagaagcgggtcagctgcaagatggacgggtgcttgcctcttcttgcactacttagctagtaatta  
ggactatgtatgtaatgaatgtatatagtccattaaagacgcccctgcttggatggaggtcccggcatttgtatgaat  
caa-ttgttcgaattgttcggaaattgttacctttagcagcaacgaacctga-  
gggtgtagggtggccaggtgggagaagtgtgatgtttctttcagtaacaatctttgtgcaagtgatctgtatatagtcta  
ctgttttaataagca-----  
-----atggttgcaac-----

>CML333\_AY107195

-----cgaggtgatttgtgctcttcactatgcttgaaaattc-----  
-----tagcctttctagattcgtatcta--  
tctcttaattttgatgtaatctgctccagttatgcctaagaaatattctgtgtagttccatttccattt-

cttagtctcatgcctgccttctcatgtttctttcagggcaacccaagaggcatctccttaccaccggctggagtgtcttt  
gtagctcaaaaagattgggtttctggggatgcattcatcttcatgaggtacaataccctga-----  
atccctgagcatgataactgaagaggtttgggtgcattttgcacctgtcactcagcttttgggtttatattggggatgaact  
tatataatttatgtactcattatggattacttttactaattattgttcttctgaatggcagaggtgaaaatggtgagcta  
cgggttgggtgtaaggaggctcatgagacaagtaaatagcatgccgtcatctgtcatatcaagccacagcatgcatcttgg  
agtattggccacagcctcccatgccatctccactggaaccctcttttctgttttctacaaaccaaggtttgatg-  
ttgttttgctttatctatacatatgtctgcagtgcaacttcttattaatggatgtgcaactgtcctg---  
atctgactgtactttctgtttgctaatttcactctgtttcaaatttcaaagtcagttctgtactctgcttttagttgtaaa  
caagctttttgattgttagctactgcatccattgagtgatgtcttatcccttgcccccttcccttgcaccaagatacacac  
tatggttgtcctagtttagcattatcgtgtgcattgtttgtttccttcataatcttgctcgctaaactttatgctcctttt  
atgtgttcccagaactagtcgctctgattttatgtgagtgatgaaagaagtccttgaagcgaagcaaaaatctg  
ttggaatgaggtttaagatgagattgaaggtgatgctcctgaaagaaggtatgatttggactt-  
catctaaacattttatctatgctgggagcaaaattacatttctgctctggttacaggttcagcggaaacaatcattggcatc  
gggagtttgcggcaatgtcaaaatctctgtggcagattctgactggagatctctaaaggtaatgatgtttttt--  
ctttgttaaattagtagtgctctctgcaa-ctgtgcagagtgattcattatatttattccc--  
atctcccaaatgtaactcaaaactgtaagtttaccaggttcaatgggatgaaccttcatccattcttctgctccagataga  
atctcaccatgggaagtggagccactggatgcagctaatccacaatcccctcaacctccactaagggttaagcgtccacg  
acccccagcttccacttgtatgggtttcggaactgccttccaggttttggtaaggagtagcaataatttggttatgaaat  
ggttcatcttctagaatgctcagttcatggataccataagcattcttggatgaatgtgatgtgctctcctactgtatc  
tgagttcttgtggcattcatgttaggactctggaaatcccgaatgaatcatcctgtacactctcattttcggaaacctca  
acgggctcgagagttatttcttcaatcccacgtcaaccttgtcatcttcatcaaatgtcagttttaaattcaaagaatg  
agccgtccatgctaaccagtcagttctactggctcagcaaggcatacaagagctgactcctgctgcttagcaccaacaca  
gtcgtaatgaaaagaagcaagagccaagttctgggtgggtgtgagattgtttggaattaatataatgctcagctgaggaaga  
agtattacctgaggttactgctccaggtgttgggttatgagcagactgctgcctctgtagagttgaactcggataagctct  
cacagccatctgatgtcaacaattctgatgccctagcagctagcagtgaaagcttccactcttgaatcccaaagccggcaa  
gtgaggagctgtaccaaggtgatgttttatatcac--tacttttt-  
ctcatcatgttctgttcttctgcttgtgggttcaactgggtaactgattaatg-  
ttgtgcacacaggttaattatgcaaggaatggcagtaggaagggtctgtagacctgacaaagcttagtggtcagcagctct  
ttgccagaagctggaggagatgtttgacatccagggggagctgggttccacactaaagaaatggcgggctcattttcactg  
atgatgaggatgacatgatgcttgttgggtgatgctcttgggagtaagaaccttctgctctgatttaacagagtgatgt  
ttccattatttggaaagtcctaatccctgtgcaatgcattctcctcagtgagtttgcaggatgggtaaaaggatttaca  
tttacacatacagaggaggcaagaagctgacatccaagtcacaagttaccgggttagcagtgacagcagcaagctgagcgt  
gcgaactcactgtctgaatgactatgaacaaaaactgcagagtgctaacgtccctctaattttgttatttccatcattt  
attatgggggtgaatgctcaggttctcctgctgggctgaag-----  
ttgtgggtggcattcaactgccttgagttttggaggcttttggactgccttggcagcatgagcctcctggaagaggcacc  
ctggcatctgctgcccatttcccatttgttctgctgcccgtttggtaggagatccattggcttatttagcagg--  
tccctgggttgaagaaagaagcggctcagctgcaagatggacgggtgccttgcctcttcttgcactacttagctagtaatta  
ggactatgtatgtaaatgatatagtgccatgaagacgcccattgcccgttattgaggtcccggcatttgtatgaat  
caa-ttgttc-----ggaaattgttaccttttagcagcaacgaacctga-  
gggtgtaggggtggcaggtgggagaagttgtatgtttctttcagtaacaatctttgtgcaagtgatctgtatagctca  
ctgttttaataagca-----  
-----atgttgtgca-----

>CML322\_AY107195

-----ggtgatttctgctcttccactatgcttgaaaattc----  
-----tagcctttctagattcgtatcta--  
tctcttaattttgatgtaactctgctccagtttgcctaagaaatattctgtgtagttccatttccattt-  
cttagtctcatgcctgccttctcatgtttctttcagggcaacccaagaggcatctccttaccaccggctggagtgtcttt  
gtagctcaaaaagattgggtttctggggatgcattcatcttcatgaggtacaataccctga-----  
atccctgagcatgataactgaagaggtttgggtgcattttgcacctgtcactcagcttttgggtttatattggggatgaact  
tatataatttatgtactcattatggattacttttactaattattgttcttctgaatggcagaggtgaaaatggtgagcta  
cgggttgggtgtaaggaggctcatgagacaagtaaatagcatgccgtcatctgtcatatcaagccacagcatgcatcttgg  
agtattggccacagcctcccatgccatctccactggaaccctcttttctgttttctacaaaccaaggtttgatg-  
ttgttttgctttatctatacatatgtctgcagtgcaacttcttattaatggatgtgcaactgtcctg---  
atctgactgtactttctgtttgctaatttcactctgtttcaaatttcaaagtcagttctgtactctgcttttagttgtaaa  
caagctttttgattgttagctactgcatccattgagtgatgtcttatcccttgcccccttcccttgcaccaagatacacac

tatgggttgctcctagtttagcattatcgtgtgcatgttttggttccctcataaatcttgctcgctaaactttatgctcctttt  
atgtgttcccagaactagtcgctctgattttatgtgagtgatgacacagtaacctggaagctaagaagcagaaaaatctg  
ttggaatgaggtttaagatgagatgtgaaggtgatgatgctcctgaaagaaggtatgatttggactt-  
catcctaaacattttatgtctgggagcaaaaattacatttctctggttacaggttcagcgggaacaatcattggcatc  
gggagtttgccggcaatgtcaaaatctctgtgggcagattctgactggagatctcctaaaggtaatgatgatttttt--  
ctttgttaaatttagtagtgctctctgcaa-ctgtgcagagtgattcattatattttattccc--  
atctcccaaagttaactctaaactgtaagtttaccaggttcaatgggatgaaccttcatccattcttctgctccagataga  
atctcaccatgggaagtggagccactggatgcagctaatccacaatcccctcaacctccactaagggttaagcgtccacg  
acccccagcttcaccttgtatgggttcggaactgccttcaggttttggaaggagtacagtaaatattgttatgaaatat  
ggttcatcttctagaatgctcagttcatggataccataagcattcttggatgaatgtgatgctctcctactgtatc  
tgagttcttgtggcattcatgttaggactctggaatcccccaattgaaatcatcctgtacactctcattttcggaacctca  
acgggctcgagagttatttccctcaatccccacgtcaaccttgtcatcttcatcaaagtgcagtttaattcaaagaatg  
agcgcctcatgctaaccagtcagttctactggtcagcaaggcatacaagagctgactcctgctgctgactgacccaacaca  
gtcgtaatgaaaagaagcaagagccaagttctggtgggttgtagattggttggaaattaatatgctcagctgaggaaga  
agtattacctgaggttactgctccaggtgttgggttatgagcagactgctgcctctgtagagttgaaactcggataagctct  
cacagccatctgatgtcaacaattctgatgccctagcagctagcagtgaaagcttcacctcttgaatcccaaagccggcaa  
gtgaggagctgtaccaaggtgattttatatcac--tacttttt-  
ctcatcatgttctgttcttctgcttctggttctactgggtaactgattaatg-  
ttgtgcacacaggttaattatgcaaggaatggcagtaggaagggctgtagacctgacaaagcttagtggctacagcgtatc  
ttgccagaagctggaggagatgtttgacatccagggggagctgggttccacactaaagaaatggcgggtcattttcactg  
atgatgaggatgacatgatgcttgttggagatgatccttgggagtaagaaccttctgctctctgtatgaacagagtgcatgt  
tttccattattggaagtcccaatccctgtgcaatgcatcttccctcagtgagtttgcaggatgggtaaaaggatttaca  
tttacacatacaggaggcaagaagctgacatccaagtaaaagttaccgggttagcagtgacagcagcaagctgagcgt  
gcaactcactgtctgaatgactatgaacaaaaactgcagagtgctaactcctcctcctaatatttgttatttccatcattg  
attatgggggtgaatgctcacggttgcctcctggtgggtgaag-----  
ttgtggttggcattcaactgccttgagtttggaggcttttggactgccttgccagcatgagcctcctggaagaggcacc  
ctggcatctgctgcccatttcccatttgttctgctgcccgttggtaggagatccattggcttatttagcagg--  
tccctgggttgaagaaagaagcggctcagctgcaagatggacgggtgccttgccctcttctcgcactacttagctagtaatta  
ggactatgtagtaataatgatatagtgccatgaagacgcccctgcccctggatggaggtcccggcatttgtatgaat  
caa-ttgttc-----gaaattgttacctttagcagcaacgaacctga-  
gggtgtaggggtggcaggtgggagaagttgtatgttcttccagtaacaatcttctgcaagtgatctgtatatagctca  
ctgttttaataagca-----  
-----atgttctgcaacttgcgctc---

>CML247\_AY107195

-----ggatgttctgctcttccactatgcttgaaaattc-----  
-----tagcctttctagattcgtatcta--  
tctcttaattttgatgtaactctgctccagttatgcctaagaaatattctgtgtagttccatttccattt-  
cttagtctcatgctgccttctcatgttcttccagggcaacccaagaggcatctccttaccaccggctggagtgcttt  
gttagctcaaaaagattgggttctggggatgcattcatcttcatgaggtacaataacctga-----  
atccctgagcatgataactgaagaggtttgggtgcattttgcacctgtcactcagcttttgggtttatattggggatgaact  
tatataatttatgtactcattatggattactttctactaattattgttcttctgaaatggcagaggtgaaaatggtagct  
cgggttgggtgtaaggaggctcatgagacaagtaaatagcatgcccgtcatctgtcatatcaagccacagcatgcatcttgg  
agtattggccacagcctcccctgcccctcctcactggaacctcttctgcttcttctacaaaccaaggtttgatg-  
ttgttttgccttctatacatatgtctgcagtgcaacttcttattaatggatgtgcaactgtcctg---  
atctgactgtactttctgttctgtaatttccactctgttccaaatttcaaagtcagttctgtactctgcttttagttgtaaa  
caagctttttgatgttagctactgcatccattgagtgatgcttatcccttgccccttcttgcaccaagatacacac  
tatggttgtcctctagcttagcattatcgtgtgcatgttttgggttccctcataaatcttctgctcgctaaactttatgctccttt  
atgtgttcccagaactagtcgctctgattttatgtgagtgatgacacagtaacctggaagctaagaagcagaaaaatctg  
ttggaatgaggtttaagatgagatgtgaaggtgatgatgctcctgaaagaaggtatgatttggactt-  
catcctaaacattttatgtctgggagcaaaaattacatttctctggttacaggttcagcgggaacaatcattggcatc  
gggagtttgccggcaatgtcaaaatctctgtgggcagattctgactggagatctcctaaaggtaatgatgatttttt--  
ctttgttaaatttagtagtgctctctgcaa-ctgtgcagagtgattcattatattttattccc--  
atctcccaaagttaactctaaactgtaagtttaccaggttcaatgggatgaaccttcatccattcttctgctccagataga  
atctcaccatgggaagtggagccactggatgcagctaatccacaatcccctcaacctccactaagggttaagcgtccacg  
acccccagcttcaccttgtatgggttcggaactgccttcaggttttggaaggagtacagtaaatattgttatgaaatat

ggttcatcttctagaatgctcagttcatggataccataagcattcttggatatgaatgtgatgtgctctcctactgtatc  
tgagttcttgtggcattcatgttaggactctggaaatcccccaattgaatcatcctgtacactctcattttcggaacctca  
acgggctcgagagttatcttcaatcccacgtcaaccttgtcatcttcatcaaagtgcagtttaattcaaagaatg  
agccgtccatgctaaccagtcagttctactggtcagcaaggcatacaagagctgactcctgcgctgctagcaccaacaca  
gtcgtaatgaaaagaagcaagagccaagttctgggtggtttagattggttggaaattaatatatgctcagctgaggaaga  
agtattacctgaggttactgctccaggtggtttagagcagactgctgcctctgtagagttgaactcggataagctct  
cacagccatctgatgtcaacaattctgatgccctagcagctagcagtgaaacgttcacctcttgaatcccaaagccggcaa  
gtgaggagctgtaccaaggtgattttatatcac--tactttt-  
ctcatcatgttctgttcttgccttgggttcaactgggtaactgattaatg-  
ttgtgcacacaggttaattatgcaaggaatggcagtaggaagggctgtagacctgacaaagcttagtggtcacagcgtct  
ttgccagaagctggaggagatggttgacatccagggggagctgggttccacactaaagaaatggcgggtcattttcactg  
atgatgaggatgacatgatgcttgttggagatgatccttgggagtaagaaccttctgtctctgtattaacgagtgcatgt  
ttccattatgggaagtccaatccctgtgcaatgcaccttccctcagtgagtttgcaggatgggaaaaggattaca  
tttacacatacagaggaggcaagaagctgacatccaagtaaaagttaccgggttagcagtgacagcagcaagctgagcgt  
gcgaactcactgtctgaatgactatgaacaaaaactgcagagtgctaacgtccctctaattttgttatttccatcattg  
attatgggggtgaatgctcacggttgcctcgtgggctgaag-----  
ttgtggttggcattcaactgccttgagtttggaggcttttggactgccttggcagcatgagcctcctggaagaggcacc  
ctggcatctgcgtgccatttcccatttgttctgctgcccgttggtaggagatccattggcttatttagcagg--  
tccctgggttgaagaaagaagcggctcagctgcaagatggacgggtgccttgcctcttctcactacttagctagtaatta  
ggactatgtatgtaatgaatgtatatagtgccattaagacgcccattgcctgggtattgaggtcccggcatttgtatgaat  
caa-ttgttc-----ggaaattgttacctttagcagcaacgaacctga-  
gggtgtaggggtggccaggtgggagaagtgtatgttcttccagtaacaatcttgtgcaagtgatctgtatatagctca  
ctgttttaataagca-----  
-----atggttgtgcaacttgcgctc---

>Ky21\_AY107195

-----gtgatttgtgctcttcaactatgcttgaaaattc-----  
-----tagccttctagatctcgatctca--  
tctcttaattttgatgtaatctgctccagtttgcctaagaaatattctgtgtagttccatttccattt-  
cttagtctcatgctgccttctcatgttcttccagggcaaccgaagggcatctccttaccaccggctggagtgcttt  
gttagctcaaaaagattgggttctggggatgcatcttcatgaggtacaataccctga-----  
atccctgagcatgataactgaagaggttgggtgcattttgcacctgtcactcagcttttgggttataattggggatgaact  
tatataatttatgtactcattatggattacttctactaattattgttcttctgaatggcagaggtgaaaatggtagcta  
cgggttgggtgtaaggaggctcatgagacaagtaaatagcatgcccgtcatctgtcatatcaagccacagcatgcatcttgg  
agtattggccacagcctcccatgccatctccactggaacctcttcttctgttttctacaaaccaaggtttgatg-  
ttgttttgccttatacatatgtctgcagtgcaacttcttattaatggatgtgcaactgtcctg---  
atgtgactgtacttctgttggtaatttcaactctgttccaaatccaaagtcagttctgtactctgcttttagttgtaaa  
caagctttttgattgttagctactgcatccattgagtgatgcttatcccttggcccttcccttgcaccaaagatacacac  
tatgggtgtcctagtttagcattatcgtgtgcatgttttgttccctcataatcttgcctgcgtaaacctttatgctcctttt  
atgtgttcccagaactagtcgctctgattttattgtgagtggtgaacaagtaaccttgaagctaagaagcagaaaatatctg  
ttggaatgaggtttaagatgagatttgaaggtgatgatgctcctgaaagaaggtatgatttggactt-  
catctaaacattttatattatgctgggagcaaaaattacatttgtctctggttacaggttcagcggaaacaatcattggcatc  
gggagtttgcgggcaatgtcaaaatctctgtgggcagattctgactggagatctctaaaggtaatgatgatttttt--  
ctttgttaaattagtagtgctctctgcaa-ctgtgcagagtgattcattatatttattccc--  
atctcccaaagttaactctaaactgtaagtttaccaggttcaatgggatgaaccttcatccattcttctgcagataga  
atctcaccatgggaagtgagccactggatgcagctaatccacaatcccccaacctccactaagggtcaagcgtccacg  
acccccagcttccacttgtatgggttcggaactgccttcaaggttttggtaaggagtacagtaaatatttgttatgaaat  
ggttcatcttctagaatgctcagttcatggataccataagcattcttggatatgaatgtgatgtgctctcctactgtatc  
tgagttcttgtggcattcatgttaggactctggaaatcccccaattgaatcatcctgtacactctcattttcggaacctca  
acgggctcgagagttatcttcaatcccacgtcaaccttgtcatcttcatcaaagtgcagtttaattcaaagaatg  
agccgtccatgctaaccagtcagttctactggtcagcaaggcatacaagagctgactcctgcgctgctagcaccaacaca  
gtcgtaatgaaaagaagcaagagccaagttctgggtggtttagattggttggaaattaatatatgctcagctgaggaaga  
agtattacctgaggttactgctccaggtggtttagagcagactgctgcctctgtagagttgaactcggataagctct  
cacagccatctgatgtcaacaattctgatgccctagcagctagcagtgaaacgttcacctcttgaatcccaaagccggcaa  
gtgaggagctgtaccaaggtgattttatatcac--tactttt-  
ctcatcatgttctgttcttgccttgggttcaactgggtaactgattaatg-

ttgtgcacacaggttaattatgcaaggaatggcagtaggaagggctgtagacctgacaaagcttagtggctacagcgatct  
ttgccagaagctggaggagatggttgacatccagggggagctgggttccacactaaagaaatggcgggtcattttcactg  
atgatgaggatgacatgatgcttgttggagatgatccttgggagtaagaacccttgtctctgtattaacgagtgcatgt  
ttccattattggaagtcctaaccctgtgcaatgcatcttccctcagtgagtttgcaggatggtgaaaaggatttaca  
tttacacatacaggaggcaagaagctgacatccaagtcaaagttaccggtagcagtgacagcagcaagctgagcgct  
gcgaactcactgtctgaatgactatgaacaaaaactgcagagtgctaacgtccctctaattttgttatttccatcatttg  
attatgggggtgaatgctcacggttgcctcggtgggctgaag-----  
ttgtggttggcattcaactgccttgagtttggaggcttttggactgccttggcagcatgagcctcctggaagaggcacc  
ctggcatctgctgcccatttcccatttgttcgtgcccgttggtaggagatccattggcttatttagcagg--  
tccctgggttgaagaaagaagcggctcagctgcaagatggacgggtgccttgcctcttcttcgactacttagctagtaatta  
ggactatgtagtaataatgtagtgcatttaagacgcccagccttggtagggtccggcatttgtatgaat  
caa-ttgttc-----ggaaattgttacctttagcagcaacgaacctga-  
gggtgtaggggtggcagggtgggagaagttgtagtcttcttccagtaacaactcttgtgcaagtgatctgtagatagctca  
ctgttttaataagca-----  
-----atgttgtgcaacttgcgct----

>Jalisco\_Benz 967\_AY107195

-----ggtagatttgtgctcttccactatgcttgaaaattc-----  
-----tagcctttctagattcgtatcta--  
tctcttaattttgatgtaactctgctccagtagtgcctaagaaatattctgtgtagttccatttccattttcttagtctca  
tgctgccttctcatggttcttccagggcaaccacaagaggcatctccttaccaccggctggagtgcttctgttagctcaa  
aaagattgggttctggggatgcatccttcatgaggtacaataccctga-----  
atccctgagcatgataactgaagaggttgggtgcatttgcacctgctcactcagcttttgggttataattggggatgaact  
tatataattatgtactcattatggattacttctactaattattgttcttctgaaatggcagaggtgaaaatggtagctca  
cgggttgggtgtaaggaggctcatgagacaagtaaatagcatgcccgtcatctgtcatatcaagccacagcatgcatcttgg  
agtattggccacagcctcccagccatctccactggaaccctcttctgttttctacaaaccaaggtttgatg-  
ttgttttgccttatacatatgctctgagtgcaacttcttattaatggatgtgcaactgtcctg---  
atctgactgtacttctgtttgctaatttccactctgttccaaatttcaaagtcagttctgtactctgctttagttgtaaa  
caagctttttgatgtagctactgcatccattgagtgatgcttctccttgccttcccttggcaccacagatacacac  
taggttctctagtagcttagctgctgcatggttcttcttccgctcacaatcttgcctcagctaaactttagctcctttt  
atgtgttcccagaactagctcgtctgattttattgtgagtggaacaagtagccttgaagctaagaagcagaaaaatctg  
ttggaatgaggtttaagatgagatttgaaggtgatgagctcctgaaagaaggtatgatttggactt-  
catctaaacattttattatgctgggagcaaaaattacatttgcctctggttacagggtcagcggcaacaatcattggcacc  
gggagtttgcgggcaatgtcaaaatctctgtgggcagattctgactggagatctcctaaaggtaatgatgatttttt--  
cttctgttaaattagtagtgctctctgcaa-ctgtgcagagtgattcattatatttattccc--  
atctcccaaagttaactctaaactgtaagtttaccagggttcaatgggatgaaccttcatccattcttctgctccagataga  
atctcaccatgggaagtgaggccactggatgcagctaatccacaatccctcaacctccactaagggctaaagcgtccacg  
acccccagcttccacttgtatgggttccggaactgccttccaggttttggtaaggagtacagtaaatatttggtagtaaat  
gggtcatcttctagaatgctcagttcatggataccataagcattcttggatagatgagtgatgctctcctactgtatc  
tgagttcttgtggcattcatgttaggactctggaaatccccaatgaaatcatcctgtacactctcattttcggaacctca  
acgggctcagaggttatttccctcaatccccacgtcaaccttgtcatcttcatcaaatgtcagttttaaattcaagaatg  
agccgtccatgctaaccagtcagttctactggctcagcaaggcacaagagctgactcctgcgctgctagcaccaacaca  
gtcataattgaaaagaagcaagagccaagttctgggtggtttagatggttggaaatataatgctcagctgaggaaga  
agtattacctgaggttactgctccaggtgttgggtatgagcagactgctgcctctgtagagttgaaactcggataagctct  
cacagccatctgatgtcaacaattctgatgccctagcagctagcagtgaaagcttccactcttgaatcccaaagccggcaa  
gtgaggagctgtaccaaggtgattttatatcac--tactttt-  
ctcatcagttctgttcttgccttctggttccactgggtaactgattaatg-  
ttgtgcacacaggttaattatgcaaggaatggcagtaggaagggctgtagacctgacaaagcttagtggctacagcgatct  
ttgccagaagctggaggagatggttgacatccagggggagctgggttccacactaaagaaatggcgggtcattttcactg  
atgatgaggatgacatgatgcttgttggagatgatccttgggagtaagaacccttgtctctgtattaacgagtgcatgt  
ttccattattggaagtcctaaccctgtgcaatgcatcttccctcagtgagtttgcaggatggtgaaaaggatttaca  
tttacacatacaggaggcaagaagctgacatccaagtcaaagttaccggtagcagtgacagcagcaagctgagcgct  
gcgaactcactgtctgaatgactatgaacaaaaactgcagagtgctaacgtccctctaattttgttatttccatcatttg  
attatgggggtgaatgctcacggttgcctcggtgggctgaag-----  
ttgtggttggcattcaactgccttgagtttggaggcttttggactgccttggcagcatga-  
cctcctggaagaggcaccctggcatctgctgcccatttcccatttgttcgtgcccgttggtaggagatccattggctta

tttagcagg--  
tccctgggtttgaagaaagaagcgggtcagctgcaagatggacgggtgccttgccctcttcttcgactacttagctagtaatta  
ggactatgtatgtaaatgaatgtatatagtgctattaagacgcccatgccctgggtattgaggtcccggcatttgtatgaat  
caa-ttgttc-----ggtaattgttacctatagcagcaacgaacctga-  
gggtgtaggctggccaggtgggagaagatgtatgtttcttcagcaacaatctttgtgcaagtgatctgtatatagtcta  
ctgttttaataagca-----  
-----atggtgtgcaacttgcgctccta

>Jalisco\_INIFAP JSG y MAS 264\_AY107195

-----ttgtgctcttcactatgcttgaaaattc----  
-----tagcctttctagattcgtatctc--  
tctcttaattttgatgtaatctgctccagatattgcataagaaatattctgtgtagttccatttcgggtttt-  
ttagtctcatgcctgcctt---  
atgtttctttcagggcaacccaagaggcatctccttaccaccggctggagtgcttttggttagctcaaaaagattgggttc  
tggggatgcattcatcttcatgaggtacaataacctga-----  
atccctgagcatgataactgaagaggtttgggtgcattttgcacctgtcactcagctggtgggtttatatggggatgaact  
tatataatttatgtacttattatggattactttctactaattattgttcttctgaatggcagaggtgaaaatgggtgagcta  
cgggttgggtgtaaggaggctcatgagacaagtaaatagcatgccgtcatctgtcatatcaagccacagcatgcatcttgg  
agtattggccacagcctcccatgccatctccactggaacctctttctgttttctacaaaccaaggtttgatg-  
tttttttgcctttatctatacatatgtctgcagtgcaacttcttattaatggatgcaactgtcctg---  
atgtgactgtactttctgtttgctaatttcgctctgtttcaaatccaaagtcaagctcgtactctgctttagtgtgtaa  
caagctttttgattgtgtagctactgcatccattgagtgatgcttatcccttgcccctttcattgcaccaagatacacac  
tatggttgtcctagtttagcattatcgtgtgcatgttttgtttccttcataatcttgctcgcgtaaacctttatgctccttt  
atgtgttcccagaactagtcgctctgattttattgtgagtgatgcaacaagtaaccttgaagctaagaagcagaaaatatctg  
ttggaatgaggtttaagatgagatttgaaggtgatgatgctcctgaaagaaggtatgatttggactt-  
catctaaacattttatattatgctgggagcaaaattacatttgtctctgggttacaggttcagcgggaacaatcattggcatc  
gggagtttgcgggcaatgtcaaaatctctgtgggcagattctgactggagatctctaaaggtaatgatgattttt---  
ctttgttaaattagtagtgctctctgcaa-ttgtgcaagtgattcattatatttattccc--  
atctcccaaatggtttatctaaactgtaagttttaccaggttcaatgggtagaaccttcatccattcttctgctccagataga  
atctcaccatgggaagtggagccactggatgcagctaatccacaatccctcaacctccactaagggctaagcgtccacg  
acccccagcttccacttgtatgggttccggaactgccttcaggttttggtaaggagtagcaaatatttggatgaaat  
ggttcatcttctagaatgctcagttcatggataccataagcattcttggatgaaatgtgatgctctcctactgtatc  
tgagttcttgtggcattcatgttaggactctggaaatccccaatgaaatcactcctgtacactctcattttcggaaacctca  
acgggctcgagagttatcttccatcccccagctcaaccttgtcatcttcatcaaatgtcagtttcaattcaaagaatg  
agccgtccatgctaaccagtcagttctactgggtcagcaaggcatacaagagctgactcctgctgctgtagcaccaacaca  
gtcatagttgaaaagaagcaagagccaagttctgggtggttgttaggttgtttggaattaatataatgctcagctgaggaaga  
agtattacctgaggttactgctccaggtgttgggtatgagcagactgctgcctctgtagagttgaactcggataagctct  
ctcagccatctgatgtcaacaattctgatgccctagcagctagcagtgaaacgttcacctcttgaatcccaaagccggcaa  
gtgaggagctgtaccaaggtgattttatatacac--tactttt-  
ctcatcatgttctgttcttgccttgggttcaactgggtaactgattaatg-  
ttgtgcacacaggttaattatgcaaggaatggcagttggaagggctgtagacctgacaaagcttagtggttacagcgatct  
ttgccagaagctggaggagatgtttgacatccagggggagttgggttccacactaaagaaatggcgggtcattttcactg  
atgatgaggacgacatgatgcttgttggagatgatccttgggagtaagaacctttgtctctgtatataacagagtgcatgt  
tttccattattgaaagtccaatccatgtgcaacgcacatcttccctcagtgagttttgcaggatgggtgaaaaggatttaca  
tttacacatatgaggaggcaagaagctgacatccaagtcaaagttaccgggttagcagtgacagcagcaagctgagcgt  
gcaactcactgtctgaatgactatgaacaaaaactgcagagtgctaacgctccctctaattttgttatttccatcatttg  
attatgggggtgaatgctcacgggtgctccgtgggctgaag-----  
ttgtggttgggtcacttcaactgccttgagttttggaggttttgactgccttggcagcatgagcctcctggaagaggcacc  
ctgacatctgctgcaactttccatttgggttctgctgcttgggttaggagatccattggcttatttagcagg--  
tccctgggtttgaagaaagaagcgggtcagctgcaagatggacgggtgccttgccctcttcttcgactacttagctagtaatta  
ggactatgtatgtaaatgaatgtatatagtgccattaagacgcccatgccctgggtattgaggtcccggcatttgtatgaat  
caa-ttgttc-----ggaaattgttacctttagcagcaacgaacctga-  
gggtgtaggggtggccaggtgggagaagttgtatgtttcttcagtaacaatctttgtgcaagtgatctgtatatagtcta  
ctgttttaataagca-----  
-----atggtgtgcaacttgcgctccta



>Balsas\_CIMMYT 11355\_AY107195

-----ttgtgctcttcactatgcttgaaaattc-----  
-----tagcctttctagattcgtatcta--  
tctcttaattttgatgtaactctgctccagattgcctaagaaatattctgtgtagttccatttccattt-  
cttagtctcatgcctgccttctcatgtttctttcagggcaacccaagaggcatctccttaccaccgggctggagtgtcttt  
gtagctcaaaaagattgggttctggggatgcattcatcttcatgaggtacaataccctga-----  
atccctgagcatgataactgaagaggtttgggtgcattttgcacctgtcactcagcttttgggtttatattggggatgaact  
tataatattatgtactcattatggattacttttctactaattattgttcttctgaatggcagaggtgaaaatgggtgagcta  
cgggttgggtgtaaggaggctcatgagacaagtaaatagcatgccgtcatctgtcatatcaagccacagcatgcatcttgg  
agtattggccacagcctcccagtcctcactggaacctcttttctgttttctacaaaccaaggtttgatg-  
ttgttttgcctttatctatacatatgtctgcagtgcaactcttattaatggatgtgcaactgtcctg---  
atttgactgtactttctgtttgctaatttctcactctgtttcaaatttcaaagtcaagttctgtactctgcttttagttgtaaa  
caagctttttgattgtgactgcatccattgagtgatgtcttatcccttgccccttcccttgcaccaaagatacacac  
tatgggtgtcctagtttagcattatcgtgtgcatgttttgtttccttcataatcttgcctgcgtaaacctttatgctcctttt  
atgtgttcccagaactagtcgctctgattttattgtgagtgatgctcctgaaagaaggatgatttggactt-  
catctaaacattttatattatgctgggagcaaaaattacatttgtctctgggttacagggtcagcggacaacatcattggcatc  
gggagtttgcgggcaatgtcaaaatctctgtgggcagattctgactggagatctctaaaggtaatgatgatttttt--  
ctttgttaaatttagtagtgctctctgcaa-ctgtgcagagtgattcattatatttattccc--  
atctcccaaagttaactctaaactgtaagtttaccagggttcaatgggatgaaccttcatccattcttctgctccagataga  
atctcaccatgggaagtggagccactggatgcagctaattccacaatcccctcaacctccactaagggtcaagcgtccacg  
acccccagcttcaccttgtatgggttccggaactgccttccaggttttggtaaggagtacagtaaatattgttatgaaatat  
ggttcatcttctagaatgctcagttcatggataccataagcattcttggatgatgaatgtgagtgctctcctactgtatc  
tgagttcttgtggcattcatgttaggactctggaaatcccattgaatcatcctgtacactctcattttcggaaacctca  
acgggctcgagagttatttcttcaatcccacgtcaaccttgtcatcttcatcaaatgtcagttttaaattcaaagaatg  
agccgtccatgctaaccagtcagttctactgggtcagcaaggcatacaagagctgactcctgctgctgtagcaccaacaca  
gtcgtaattgaaaagaagcaagagccaagttctgggtggttgtagattgtttggaatataatgctcagctgaggaaga  
agtattacctgaggttactgctccaggtgttgggtatgagcagactgctgcctctgtagagttgaactcggataagctct  
cacagccatctgatctcaacaattctgatgccctagcagctagcagtgaaactcactccttgaatcccaaagccggcaa  
gtgaggagctgtaccaaggtgattttatatacac--tacttttt-  
ctcatcatgttctgttcttctgttgggttactgggtaactgattaatg-  
ttgtgcacacaggttaattatgcaaggaatggcagtaggaagggctgtagacctgacaaagcttagtggtcagcgcgatct  
ttgccagaagctggaggagatgtttgacatccagggggagctgggttccacactaaagaaatggcgggtcattttcactg  
atgatgaggatgacatgatgcttgttggagatgatccttgggagtaagaaccttctgtctctgtatataacagagtgcatgt  
tttccattattggaagtcccaatccctgtgcaatgcatcttcttccagtgagttttgaggatgggtgaaaaggatttaca  
tttacacatacaggaggcaagaagctgacatccaagtcaaagttaccgggttagcagtgacagcagcaagctgagcgt  
gcgaactcactgtctgaatgactatgaacaaaaactgcagagtgctaacgtccctctaattttgttatttccatcatttg  
attatgggggtgaatgctcacgggttgcctcctggtgag-----  
ttgtgggttggcattcaactgccttgagtttggaggcttttggactgccttggcagcatgagcctcctggaagaggcacc  
ctggcatctgctgcccatttccatttcttctgctgcttggtaggagatccattggcttatttagcagg--  
tccctgggttgaagaaagaagcggctcagctgcaagatggacgggtgccttgcctcttcttgcactacttagctagtaatta  
ggactatgtatgtaatgaatgtatataagtgcattaaagacgcccagccttggatattgaggtcccggcatttgtatgaat  
caa-ttgttc-----ggaaattgttacctttagcagcaacgaacctga-  
gggtgtaggggtggccaggtgggagaagttgtatgtttctttcagtaacaactcttgtgcaagtgatctgtatatagtcta  
ctgttttaataagca-----  
-----atgttgtgcaacttgcgctccta

>Balsas\_INIFAP JSG y LOS 161\_AY107195

-----ttttcagaggtgatttgtgctcttcactatgcttgaaaattc-----  
-----tagcctttctagattcgtatcta--  
tctcttaattttgatgtaactctgctccagattgcataagaaatattctgtgtagttccatttccattt--  
ttagtctcatgcct----  
tctcatgtttctttcagggcaacccaagaggcatctccttaccaccgggctggagtgtctttgttagctcaaaaagattgg  
tttctggggatgcattcatcttcatgaggtacaataccctga-----  
atccctgagcatgataactgaagaggtttgggtgcattttgcacttgtcactcagctgttgggtttatattggggatgaact

tatatatattatgtactcattatggattacttttctactaattatttgttcttctgaatggcagaggtgaaaatggtagctac  
cgggttgggtgtaaggaggctcatgagacaagtaaatagcatgccgtcatcggtcatatcaagccacagcatgcatcttgg  
agtattggccacagcctcccatgccatctccactggaaccctcttttctgtttctacaaaccaagggtttgatg-  
tttttttgcctttatctatacatatgtctgcagtgcaacttcttattaatggatgtgtaactgtcctg---  
atgtgactgtacttttctgtttgcctaatttctactctgtttcaaatttcaaagtcagttctgtactctgcttttagttgtaaa  
caagcttttttgattgttagctactgcatccattgagtgatgtcttatcccttgcccctttcattgacacaaagatacacac  
tattgttgtcctagtttagcattatcgtgtgcatgttttgtttccttcataatcttgccttgcctaaactttatgctcctttt  
atgtgttcccagaactagtcgctctgattttattgtgagtgatgtaacaagtcacttgaagctaaagaagcagaaaatatctg  
ttggaatgaggtttaagatgagatttgaagggtgatgctcctgaaagaaggatgatttggactt-  
catctaaacatttttattatgctgggagcaaaattacatttgtctctgggttacaggttcagcgggaacaatcattggcatc  
gggagtttgcgggcaatgtcaaaatctctgtgggcagattctgactggagatctctaaaggtaatgatgattttttt-  
ctttgttaaattagtagtgctctctgcaa-ttgtgcagagtgatttattatatttattccc--  
atctcccaaatgtaaatctaaactgtaagttttaccaggttcaatgggatgaaccttcatccattcttctgctccagataga  
atctcccatgggaagtggagccactggatgcagctaatccacaatcccctcaacctccactaagggttaagcgtccacg  
acccccagcttcaccttgtatgggttccggaactgccttcaggttttggtaaggagtagcagtaatatgtttatgaaatat  
ggttcatcttctagaatgctcagttcatggataccataagcattcttggatagatgagtgatgctctcctactgtatc  
tgagttcttgtggcattcatgttaggactctggaaatcccccaattgattcatcctgtacactctcattttcggaaacctca  
acgggctcgagagttatttcttcaatccccgcgtcaaccttgtcatcttcatcaaatgtcagtttcaattcaaagaatg  
agccgtccatgctaaccagtcagttctactgggtcagcaaggcatacaagagctgactcctgcgctgctagcaccaacaca  
gtcatagttgaaaagaagcaagagccaagttctgggtggtttagatgtttggaattaatataatgctcagctgaggaaga  
agtattacctgaggttactgctccaggtgttgggtatgagcagactgctgcctctgtagagttgaactcggataagctct  
ctcagccatctgatgtcaacaattctgatgccctagcagctagcagtgaaagctcacctcttgaatcccaaagccggcaa  
gtgaggagctgtaccaaggtgattttatatcac--tacctttt-  
ctcatcatgttctgttcttgccttgggttcaactgggtaactgattaatg-  
ttgtgcacacaggttaattatgcaaggaatggcagtaggaagggtgtagacctgacaaagcttagtggtacagcgatct  
ttgccagaagctggaggagatgtttgacatccagggggagctgggttccacactaaagaaatggcgggtcattttcactg  
atgatgaggacgacatgatgcttgttggagatgatccttgggagtaagaaccttctgtctctgtatcaacgagtgcatgt  
tttccattattgaaagtcctaactctctgtgcaatgcatcttcttccagtgagtttgcaggatgggtgaaaaggatttaca  
tttacacatatgaggaggcaagaagctgacatccaagtcaaagttaccgggttagcagtgacagcagcaagctgagcgt  
gcaactcactatctgaatgactatgaacaaaaactgcagagtgctaaagctccctctaattttgttatttccatcatttg  
attatgggggtgaatgctcacgggtgctccgtgggctgaag-----  
ttgtgggtggcattcaactgccttgagtttggaggcttttggactgccttggcagcatga-  
cctcctggaagaggcaccctggcatctgcgtgccatttcccatctgttctgctgcccgtttggtaggagatccattggctta  
tttagcagg--  
tccttgggttgaagaaagaagcgggtcagctgcaagatggacgggtgccttgcctcttcttgcactacttagctagtaatta  
ggactatgtatgtaaatgtaatatagtgccattaagacgcccattgctcctggatttgagggtcccggcatttgtatgaa  
caa-ttgttc-----ggtaattgttaccttttagcagcaacgaacctga-  
gggtgtaggggtggccaggtgggagaagatgtatgttcttccagcaacaatcttgtgcaagtgatctgtatatagtcta  
ctgttttaataagca-----  
-----atggtgtgcaacttgcgctccta

>Balsas\_INIFAP JSG y LOS 119\_AY107195

-----ggtgatttgtgctcttcaactatgcttgaaaattc----  
-----tagcctttctagattcgtacta--  
tctcttaattttgatgtaactctgctccagtttgcataagaaatattctgtgtagttccattttccattt-  
cttagtctcatgccccttctcatgtttcttccagggcaaccaagaggcatctccttaccaccggctggagtgcttt  
gttagctcaaaaagattgggttctggggatgcatctcctcatgaggtacaataacctga-----  
atccttgagcagataaactgaagaggttgggtgcatcttgcactcagcttttgggttataatggggatgaact  
tatatatattatgtactcattatggattacttttctactaattatttgttcttctgaatggcagaggtgaaaatggtagctac  
cgggttgggtgtaaggaggctcatgagacaagtaaatagcatgccgtcatctgtcatatcaagccacagcatgcatcttgg  
agtattggccacagcctcccatgccatctccactggaaccctcttttctgtttctacaaaccaagggtttgatg-  
ttgttttgcctttatctatacatatgtctgcagtgcaacttcttattaatggatgtgcaactgtcctg---  
atgtgactgtacttttctgtttgcctaatttctactccgtttcaaatttcaaagtcagttctgtactctgcttttagttgtaaa  
caagcttttttgattgttagctactgcatccattgagtgatgtcttatcccttgccccttcttggcaccacaaagatacacac  
tatgggtgtcctagtttagcattatcgtgtgcatgttttgtttccttcataatcttgcctgctaaactttatgctcctttt  
atgtgttcccagaactagtcgctctgattttattgtgagtgatgtaacaagtcacttgaagctaaagaagcagaaaatatctg

ttggaatgaggtttaagatgagatttgaaggtgatgatgctcctgaaagaaggtatgatttggactt-  
catctaaacattttatattatgctgggagcaaaattacatttgtctctgggttacaggttcagcgggaacaatcattggcatc  
gggagtttgccggcaatgtcaaaatctctgtgggcagattctgactggagatctctaaaggtaatgatgatttttttct  
ttgttaaattagtagtgctctctgcaa-ttgtgcagagtgatttattatatttattccc--  
atctcccaaagttaactctaaactgtaagtttaccaggttcaatgggatgaaccttcatccattcttctgctccagataga  
atctcaccatgggaagtggagccgctggatgcagctaatccacaatcccctcaacctccactaagggctaagcgtccacg  
acccccagcttcaccgctgatggtttcggaactgccttcaggttttggaaggagcacagtaaatattgttatgaaat  
ggttcatcttctagaatgctcagttcatggataccataagcattcttggatgaatgtgatgctctcctactgtatc  
tgagttattgtggcattcatgttaggactctggaaatcccgaattgaatcatcctgtacactctcattttcggaaacctca  
acgggctcgagagttatttcttcaatccccacgtcaaccttgtcatcttcatcaaagtgcagttcaattcaaagaatg  
agcctccatgctaaccagtcagttctactgggtcagcaaggcatacaagagctgactcctgcgctgctagcaccaca  
gtcatagttgaaaagaagcaagagccaagttctgggtggttgtagattggttgggaattaatataatgctcagctgaggaaga  
agtattacctgaggttactgctccaggtgtgggttatgagcagactgctgcctctgtagagttgaactcggataagctct  
ctcagccatctgatgttaacaattctgatgccctagcagctagcagtgaaacgttccctcttgaatcccaaagccggcaa  
gtgaggagctgtaccaaggtgattttatcac--tacttgtt-ctcatcatgttctgttcttctgcttgtgggt-----  
--actgattaatg-  
ttgtgcacacaggttaattatgcaaggaatggcagttggaagggctgtagacctgacaaagcttagtggtcagcgcgatct  
ttgccagaagctggaggagatggttgacatccagggggagctgggttccacactaaagaaatggcgggtcattttcactg  
atgatgaggacgacatgatgcttgttggagatgatccttgggagtaagaaccttctgtctctgtatataacgaatgcatgt  
tttccattattgaaagtccaatccctgtgcaatgcatcttctccttcagtgagtttgcaggatgggtaaaaggatttaca  
tttacacatatgaggaggcaagaagctgacatccaagtcacaagttaccgggttagcagtgacagcagcaagctgagcgt  
gcaactcactgtctgaatgactatgaacaaaaactgcagagtgctaacgtccctctaattttgttatttccatcatttg  
attatgggggtgaat-ctcacggttgctccgtgggctgaag-----  
ttgtgggtggcattcaactgccttgagtttggaggcttttggactgccttggcagcatgagcctcctggaagaggcacc  
ctggcatctgctgcccatttcccatttgttctgctgcccgtttggtaggagatcaattggcttatttagcagg--  
tccctgggttgaagaaagaagcggctcagctgcaagatggacggctgccttgcctcttctcctgactacttagctagtaatta  
ggactatgtatgtaatgaatgtatatagtgccattaagacgcccattgcccctggattgaggtcccggcatttgtatgaat  
caa-ttgttc-----ggtaattgttaccttttagcagcaacgaacctga-  
gggtgtaggggtggcagggtgggagaagatgtatgttcttccagtaacaatcttgtgcaagtgatctgtatatagtcta  
ctgttttaataagca-----  
-----atggtgtgcaacttgcgctccta

>Balsas\_INIFAP JSG y LOS 109\_AY107195

-----tttttcgaggtgatttgtgctcttccactatgcttgaaaattc----  
-----tagcctttctagattcgtta-cca--  
tctcttaattttgatgtaatctgctccagttatgcataagaaatattctgtgtagttccatttccattt-  
cttagtctcatgctgccttctcatgttcttccagggcaacccaagaggcatctccttaccaccggctggagtgcttt  
gttagctcaaaaagattgggtttctggggatgcattcatcttcatgaggtacaataacctga-----  
atccttgagcatgataactgaagaggtttgggtgcattttgcacctgtcactcagcttttgggtttatattggggatgaact  
tatataattatgtactcattatggattactttctactaattattgttcttctgaaatggcagaggtgaaaatgggtgagcta  
cgggttgggtgtaaggaggctcatgagacaagtaaatagcatgccgtcatctgtcatatcaagccacagcatgcatcttgg  
agtattggccacagcctcccattgccatctccactggaacctcttttctgttttctacaaaccaaggtttgatg-  
ttgttttgccttatacatatgtctgcagtgacttcttattaatggatgtgcaactgtcctg---  
atltgactgtactttctgtttgctaatttcaactctgtttcaaatttcaaagtcagttctgtactctgctttagttgtaaa  
caagctttttgattgttagctactgcatccattgagtgatgtcttatcccttggcccttcccttggcaccaaagatacacac  
tatgggtgtcctagtttagcattatcgtgtgcatgttttgggttcccttcataatcttgcctcgtctaaactttatgctcctttt  
atgtgttccagaactagtcgctctgattttatgtgagtggtgaacaagtcacttgaagctaagaagcagaaaaatctg  
ttggaatgaggtttaagatgagatttgaaggtgatgatgctcctgaaagaaggtatgatttggactt-  
catctaaacattttatattatgctgggagcaaaattacatttgtctctgggttacaggttcagcgggaacaatcattggcatc  
gggagtttgccggcaatgtcaaaatctctgtgggcagattctgactggagatctctaaaggtaatgatgattttttt-  
ctttgttaaattagtagtgctctctgcaa-ttgtgcagagtgatttattatatttattccc--  
atctcccaaagttaactctaaactgtaagtttaccaggttcaatgggatgaaccttcatccattcttctgctccagataga  
atctcaccatgggaagtggagccgctggatgcagctaatccacaatcccctcaacctccactaagggctaagcgtccacg  
acccccagcttcaccgctgatggtttcggaactgccttcaggttttggaaggagcacagtaaatattgttatgaaat  
ggttcatcttctagaatgctcagttcatggataccataagcattcttggatgaatgtgatgctctcctactgtatc  
tgagttattgtggcattcatgttaggactctggaaatcccgaattgaatcatcctgtacactctcattttcggaaacctca

acgggctcgagagttatcttcaatccccacgtcaacctgtcatcttcatcaaagtgcagtttcaattcaaagaatg  
agccgtccatgctaaccagtcagttctactgggtcagcaaggcatacaagagctgactcctgcgctgctagcaccaacaca  
gtcatagttgaaaagaagcaagagccaagttctgggtggtttagatgtttggaattaatatatgctcagctgaggaaga  
agtattacctgaggttactgctccaggtgttgggtatgagcagactgctgcctctgtagagttgaactcggataagctct  
ctcagccatctgatgttaacaattctgatgccctagcagctagcagtgaaacgttcacctcttgaatcccaaagccggcaa  
gtgaggagctgtaccaaggtgattttatatcac--tacttgtt-ctcatcatgttctgttcttctgcttgtggt-----  
--actgattaatg-  
ttgtgcacacaggttaattatgcaaggaatggcagttggaagggctgtagacctgacaaagcttagtggctacagcgatct  
ttgccagaagctggaggagatgtttgacatccagggggagctgggttccacactaaagaaatggcgggtcattttcactg  
atgatgaggacgacatgatgcttgttggagatgatccttgggagtaagaaccttctgtctctgtattaacgaatgcatgt  
ttccattatgaaagtcctaactcctgtgcaatgcatcttcttccagtgcagttttgcaggatgggtgaaaaggatttaca  
ttacacatatgaggaggcaagaagctgacatccaagtcaaagttaccggtagcagtgacagcagcaagctgagcgct  
gaaactcactgtctgaatgactatgaacaaaaactgcagagtgctaacgtccctctaattttgttatttccatcatttg  
attgtgggggtgaat-ctcacgggtgctccgtgggctgaag-----  
ttgtgggtggcattcaactgccttgagtttggaggcttttggactgccttggcagcatgagcctcctggaagaggcacc  
ctggcatctgcgtgccatttcccatttgttctgctgccttggtaggagatcaattggcttatttagcagg--  
tccctgggttgaagaaagaagcggctcagctgcaagatggacggctgccttgcctcttcttgcactacttagctagtaatta  
ggactatgtatgtaataatgtatatagtgccattaagacgcccctgcccctgggtattgaggtcccggcatttgtatgaat  
caa-ttgttc-----ggtaattgttacctttagcagcaacgaacctga-ggggtgtaggggtggccaggtgggaga--  
-tgtatgtttcttccagtaacaactcttgtgcaagtgatctgtatatagtctactgttttaataagca-----  
-----  
-----atggtgtgcaacttgcgctccta

>Balsas\_USDA PI566686\_AY107195

-----gtgatttgtgctcttccactatgcttgaaaattc-----  
-----tagccttctagattcgtatcta--  
tctcttaattttgatgtaactctgctccagttatgcataagaaatattctgtgtagttccatttccattt--  
ttagtctcatgcct----  
tctcatgtttcttccagggcaacccaagaggcatctccttaccaccggctggagtgcttcttgttagctcaaaaagattgg  
ttctggggatgcatccttcatgaggtacaataacctga-----  
atccctgagcatgataactgaagaggttgggtgcattttgcacttgcactcagctggtgggtttatatggggatgaact  
tatataattatgtactcattatggattacttttactaattattgttcttctgaatggcagaggtgaaaatggtagcta  
cgggttgggtgtaaggaggtcatgagacaagtaaatagcatgcccgtcatcggtcatatcaagccacagcatgcatcttgg  
agtattggccacagcctcccctgcccctcctcactggaacctcttcttctgttttctacaaaccaaggtttgatg-  
tttttttgccttctatacatatgtctgcagtgcaacttcttattaatggatgtgtaactgtcctg---  
atgtgactgtacttctgttggtaataatcactctgtttcaaatttcaaagtcagttctgtactctgctttagttgtaaa  
caagctttttgatgtgtagctactgcatccattgagtgatgtcttatcccttggcccttccattgacacaaagatacacac  
tattgttgccttagtttagcattatcgtgtgcatgttttgtttccttcataatcttgcctgctaaactttatgctcctttt  
atgtgttcccagaactagtcgctctgattttattgtgagtggaacaagtaacctgaagctaagaagcagaaaatctg  
ttggaatgaggtttaagatgagatttgaaggtgatgatgctcctgaaagaaggtatgatttggactt-  
catctaacaattttatattatgctgggagcaaaattacatttgtctctggttacaggttcagcggaaacaatcattggcatc  
gggagtttgcggcaatgtcaaaatctctgtgggagattctgactggagatctcctaaaggtaatgatgattttttt-  
cttgtttaaattagtagtgctctctgcaa-ttgtgcagagtgatttattatatttattccc--  
atctcccaaagttaactctaaactgtaagtttaccaggttcaatgggatgaaccttcatccattcttctgctccagataga  
atctcaccatgggaagtggagccgctggatgcagctaatccacaatcccctcaacctccactaagggttaagcgtccacg  
acccccagcttcccggtgatgggttccggaactgccttcaggttttggtaaggagcacagtaataattgttatgaaat  
gggtcatcttctagaatgctcagttcatggataccataagcattcttggatataatgtgtagtgctctcctactgtatc  
tgagtattgtggcattcagtttaggactctggaaatccccaaatgaaatcatcctgtacactctcattttcggaaacctca  
acgggctcgagagttatcttcaatccccacgtcaacctgtcatcttcatcaaagtgcagtttcaattcaaagaatg  
agccgtccatgctaaccagtcagttctactgggtcagcaaggcatacaagagctgactcctgcgctgctagcaccaacaca  
gtcatagttgaaaagaagcaagagccaagttctgggtggtttagatgtttggaattaatatatgctcagctgaggaaga  
agtattacctgaggttactgctccaggtgttgggtatgagcagactgctgcctctgtagagttgaactcggataagctct  
ctcagccatctgatgttaacaattctgatgccctagcagctagcagtgaaacgttcacctcttgaatcccaaagccggcaa  
gtgaggagctgtaccaaggtgattttatatcac--tacttgtt-ctcatcatgttctgttcttctgcttgtggt-----  
--actgattaatg-  
ttgtgcacacaggttaattatgcaaggaatggcagttggaagggctgtagacctgacaaagcttagtggctacagcgatct

ttgccagaagctggaggagatggttgacatccagggggagctgggttccacactaaagaaatggcgggtcattttcactg  
atgatgaggacgacatgatgcttgttggagatgatccttgggagtaagaacccttggctctgtatataacgaatgcatgt  
ttccattattgaaagtcctaaccctgtgcaatgcatcttccctcagtgagtttgcaggatggtgaaaaggatttaca  
ttacacatatgaggaggcaaagaagctgacatccaagtcacaagttaccggtagcagtgacagcagcaagctgagcgt  
gcgaactcactgctgaatgactatgaacaaaaactgcagagtgctaacgtccctctaattttgttatttccatcatttg  
attatgggggtgaat-ctcacggttgctccgtgggctgaag-----  
ttgtggttggcattcaactgccttgagtttggaggcttttggactgccttggcagcatgagcctcctggaagaggcacc  
ctggcatctgctgcccatttcccatttgttgcgtgcccgttggtaggagatcaattggcttatttagcagg--  
tccctgggttgaagaaagaagcgggtcagctgcaagatggacgggtgccttgcctcttcttcgactacttagctagtaatta  
ggactatgtatgtaatgaatgtatatagtgccattaagacgcccattgcctggattgaggtcccggcatttgtatgaat  
caa-ttgttc-----ggtaattgttacctttagcagcaacgaacctga-  
gggtgtaggggtggcagggtgggagaagatgtatgttcttccagtaacaatcttgtgcaagtgatctgtatatagtcta  
ctgttttaataagca-----  
-----atggtgtgcaacttgcgctccta

>Balsas\_INIFAP JSG 378\_AY107195

-----ggtgatttgtgctcttcactatgcttgaaaattc-----  
-----tagcctttctagattcgtatcta--  
tctcttaattttgatgtaatctgctccagttatgcataagaaatattctgtgtagttccatttccattt--  
ttagtctcatgct-----  
tctcatgtttcttccagggcaaccacaagaggcatctccttaccaccggctggagtgctcttgttagctcaaaaagattgg  
tttctggggatgcatcctcatgaggtacaataccctga-----  
atccctgagcatgataactgaagaggttgggtgcatttggcacttgtcactcagctggtgggttataattggggatgaact  
tatataattatgtactcattatggattactttctactaattattgttcttctgaatggcagaagtgaatgggtgagcta  
cgggttgggtgtaaggaggctcatgagacaagtaaatagcatgcccgtcatcggtcatatcaagccacagcatgcatcttgg  
agtattggccacagcctcccattgccatctccactggaaccctcttctgttttctacaaaccaaggtttagatgttttt  
ttgctttatctatacatatgtctgcagtgcaacttcttattaatggatgtgtaactgtcctg---  
atgtgactgtactttctgtttgctaatttcaactctgtttcaaatttcaaaagtcagttctgtactctgcttttagttgtaaa  
caagctttttgatgtgactactgcattccattgagtgatgtcttatcccttgccttccattgacacaaagatacacac  
tatgttctcctagttagcattatcgtgtgcatgtttgttccctcacaatcttgcctcgtcgtacaaactttatgctccttt  
atgtgttcccagaactagtcgctctgattttattgtgagtggaacaagtaacctggaagctaagaagcagaaaatctg  
ttggaatgaggtttaagatgagatttgaaggtgatgctcctgaaagaaggtatgatttggactt-  
tttctaaacattttatattatgctgggagcaaaattacatttgtctctggttacagggtcagcggcaacaatcattggcacc  
gggagtttgcgggcaatgtcaaaatctctgtgggcagattctgactggagatctcctaaaggtaatgatgattttttt-  
cttgtttaaattagtagtgctctctgcaa-ttgtgcagagtgatttattatatttattccc--  
atctcccaaatgttaacttaaaactgtaagtttaccagggttcaatgggatgaaccttcatccattcttctgctccagataga  
atctcaccatgggaagtggagccgctggatgcagctaatccacaatccctcaacctccactaagggtcaagcgtccacg  
acccccagcttcccttgtatgggttccggaactgccttccaggttttggtaaggagcacagtaaatattgttatgaaat  
gggtcatcttctagaatgctcagttcatggataccataagcattcttgaatatgaatgtgatgtgctctcctactgtatc  
tgagttcttgtggcattcgtgttaggactctggaaatcccattgaatcatcctgtacactctcatttccggaacctca  
acgggctcgagagttatttccctcaatcccacgtcaaccttgtcatcttcatcaaatgtcagtttcaattcaagaatg  
agccgtccatgctaaccagtcagttctactggtcagcaaggcatacaagagctgactcctgctgctgtagcaccaacaca  
gtcatagttgaaaagaagcaagagccaagttctgggtggtttagatgttggaaatataatgctcagctgaggaaga  
agtattacctgaggttactgctccaggtgttgggtatgagcagactgctgctctgtagagttgaaactcggataagctct  
cacagccatctgatgtcaacaattctgatgccctagcagctagcagtgaaagcttccctcttgaatcccgaagcggcaa  
gtgaggagctgtaccaaggtgattttatatcac--tactttt-  
ctcatcatgttctgttctgtcttctgcttctgcttctgcttctgcttctgcttctgcttctgcttctgcttctgcttctg-  
ttgtgcacacaggttaattatgcaaggaatggcagttggaagggctgtagacctgacaaagcttagtggtacagcgtatc  
ttgccagaagctggaggagatggttgacatccagggggagctgggttccacactaaagaaatggcgggtcattttcactg  
atgatgaggacgacatgatgcttgttggagatgatccttgggagtaagaacccttggctctgtatataacgagtgcatgt  
ttccattattgaaagtcctaaccatgtgcaatgcatcttccctcagtgagtttgcaggatggtgaaaaggatttaca  
ttacacatacaggaggcaaagaagctgacatccaagtcacaagttaccggtagcagtgacagcagcaagctgagcgt  
gcgaactcactgctgaatgactatgaaaaaaaactgcagagtgctaacgtccctctaattttgttatttccatcatttg  
attatgggggtgaatgctcacggttgctccgtgggctgaagctgaagtgtgtggttggcattcaa-  
tgctttaggttttggaggcttttggactgccttggcagcatgagcctcctggaagaggcaccctggcatctgctgccc  
tccccatttgttgcgtgcccgttggtaggagatattcattggcttatttagcagg--

tccctgggttgaaaaagaagcgggtcagctgcaagatggacgggtgccttgccctcttcttcgactacttagctagtaatta  
ggactatgtatgtaatgaatgtatatagtgccattaagacgcccattgccctggattgaggtcccggcatttgatgaat  
caa-ttgttc-----ggaaattggttacctttagcagcaacgaacctga-  
gggtgtaggggtggccaggtggtagaagtgtatgtttctttcagtaacaatctttgtgcaagtgatctgtatatagctca  
ctgttttaataagca-----  
-----atggtgtgcaacttgcgctccta

>Balsas\_Kato Site 4\_AY107195

-----tctttcgaggtgatttggtgctcttcactatgcttgaaaattc----  
-----tagcctttctagattcgtatcta--  
tctcttaattttgatgtaatctgctccagttatgcataagaaatattctgtgtagttccatttccattt--  
ttagtctcatgcct----  
tctcatgtttctttcagggcaaccgaagagcatctccttaccaccggctggagtgcttttggttagctcaaaaagattgg  
tttctggggatgcattcatcttcatgaggtacaataacctga-----  
atccctgagcatgataactgaagaggtttgggtgcattttgcacttgtcactcagctggtggtttatattggggatgaact  
tatataatttatgtactcattatggattactttctactaattattggtcttctgaaatggcagaagtgaatgggtgagcta  
cgggttggtgtaaggaggctcatgagacaagtaaatagcatgcccgtcatcggtcatatcaagccacagcatgcatcttgg  
agtattggccacagcctcccattgccatctccactggaacctcttttctgttttctacaaaccaaggtttgatg-  
tttttttgcctttatctatacatatgtctgcagtgcaacttcttattaatggatgtgtaactgtcctg---  
atgtgactgtactttctgtttgctaatttcaactctgtttcaaatccaaagtcaagttctgtactctgcttttagttgtaaa  
caagctttttgattgttagctactgcatccattgagtgatgtcttatcccttgcccctttcattgcaccaagatacacac  
tattgttgccttagtttagcattatcgtgtgcatgttttgtttccttcacaatcttgctcgctaaactttatgctccttt  
atgtgttcccagaactagtcgctctgattttatgtgagtgatgaacaagtaaccttgaagctaagaagcagaaaaatctg  
ttggaatgaggtttaagatgagatttgaaggtgatgatgctcctgaaagaaggtatgatttggactt-  
tttctaacaattttatattatgctgggagcaaaattacatttgtctctggttacaggttcagcggcaacaatcattggcatc  
gggagttgcccggcaatgtcaaaatctctgtgggcagattctgactggagatctctaaaggtaatgatgattttttt-  
ctttgttaaatttagtagtgctctctgcaa-ttgtgcagagtgatttattatatttattccc--  
atctcccaaagtgttaacttaaaactgtaagtttaccaggttcaatgggatgaaccttcatccattcttctgctccagataga  
atctcaccatgggaagtggagccgctggatgcagctaatccacaatccccctcaacctccactaagggctaacgctccacg  
acccccagcttccacttgtatggtttcggaaactgccttcaggttttggtaaggagcacagtaaatattggtatgaaat  
ggttcatcttctagaatgctcagttcatggataccataagcattcttgaatatgaatgtgatgtgctctcctactgtatc  
tgagttcttgtggcattcgtgttaggactctggaaatccccaatgaaatcatcctgtacactctcattttcggaaacctca  
acgggctcgagagttatttcttcaatccccacgtcaaccttgtcatcttcatcaaatgtcagtttcaattcaagaatg  
agccgtccatgctaaccagtcagttctactgggtcagcaaggcatacaagagctgactcctgctgctgtagcaccaca  
gtcatagttgaaaagaagcaagagccaagttctgggtggtttagatgtttggaattaatataatgctcagctgaggaaga  
agtattacctgaggttactgctccaggtgttgggtatgagcagactgctgcctctgtagagttgaactcggataagctct  
cacagccatctgatgtcaacaattctgatgccctagcagctagcagtgaaagcttccctcttgaatcccaaagccggcaa  
gtgaggagctgtaccaaggtgattttatatcac--tactttt-  
ctcatcatgttctgttcttgccttgggttcaactgggtaactgattaatg-  
ttgtgcacacaggttaattatgcaaggaatggcagttggaagggctgtagacctgacaaagcttagtggttacagcgatct  
ttgccagaagctggaggagatgtttgacatccagggggagctgggttccacactaaagaaatggcgggtcattttcactg  
atgatgaggacgacatgatgcttgttggagatgatccttgggagtaagaaccttctgtctctgtatataacagagtgcatgt  
tttccattattgaaagtccaatccatgtgcaatgcatcttcttccagtgagttttgcaggatgggtgaaaaggatttaca  
tttacacatacaggaggcaagaagctgacatccaagtcaaagttaccgggttagcagtgacagcagcaagctgagcgt  
gcaactcactgctgaatgactatgaaaaaaaactgcagagtgctaacgtccctctaattttgttatttccatcatttg  
attatgggggtgaatgctcacgggtgctccgtgggctgaagctgaagttgtggttggcattcaa-  
tgcttgagttttggaggcttttggactgccttccagctgagcctcctggaagaggcaccctggcatctgctgcat  
ttccatttgttctgctgcttgggtaggagttatcattggcttatttagcagg--  
tccctgggttgaaaaagaagcgggtcagctgcaagatggacgggtgccttgccctcttcttcgactacttagctagtaatta  
ggactatgtatgtaatgaatgtatatagtgccattaagacgcccattgccctggattgaggtcccggcatttgatgaat  
caa-ttgttc-----ggaaattggttacctttagcagcaacgaacctga-  
gggtgtaggggtggccaggtggtagaagtgtatgtttctttcagtaacaatctttgtgcaagtgatctgtatatagctca  
ctgttttaataagca-----  
-----atggtgtgcaacttgcgctccta

>Balsas\_INIFAP JSG 374\_AY107195

-----tttttcgaggtgatttgtgctcttcactatgcttgaaaattc-----  
-----tagcctttctagattcgtatcta--  
tctcttaattttgatgtaaatctgctccagttatgcataagaaatattctgtgtagttccatttccatt--  
ttagtctcatgcct----  
tctcatgtttctttcagggcaacccaagaggcatcttcttaccaccggctggagtgtctttgttagctcaaaaagattgg  
tttctggggatgcattcatcttcatgaggtacaataccctgattccctgaatccctgagcatgataactgaagaggttg  
gtgcattttgcacctgtcactcagctgttggtttatattggggatgaacttatataattatgtactcattatggattact  
ttctactaattattgttcttctgaatggcagaggtgaaaatggtagctacgggttgggtgtaaggaggctcatgagacaa  
gtaaatagcatgccgtcatcggtcatatcaagccacagcatgcattctggagatttggccacagcctcccatgccatctc  
cactggaactctcttttctgttttctacaaaccaaggtttgatg-  
tttttttgctttatctatacatatgtctgcagtgacttcttattaatggatgtgcaattgtcctg---  
atttgactgtactttctgttctgtaatttctactctgtttcaaatttcaaagtcagttctgtactctgcttttagttgtaaa  
caagctttttgattgtgtagctactgcattcattgagtgatgcttatcccttgccccttccattgcaccaaagatacacac  
tattgttgccttagtttagcattatcgtgtgcatgttttgtttccttcataatcttgcctcgttaaactttatgctcctttt  
atgtgttcccagaactagtcgctctgattttattgtgagtggaacaagtaccttgaagctaagaagcagaaaatctg  
ttggaatgaggtttaagatgagatttgaaggtgatgctcctgaaagaaggtatgatttggactt-  
catctaaacatttttattatgctgggagcaaaaattacatttgtctctgggttacagggtcagcggacaacatttggcatc  
gggagtttggcagcaatgtcaaaatctctgtgggcagattctgactggagatctctaaaggtaatgatgattttttt-  
ctttgttaaatttagtagtgctctctgcaa-ttgtgcagagtgatttattatatttattccc--  
atctcccaaatgttaacttaaaactgtaagtttaccagggttcaatgggatgaaccttcatccattcttctgctccagataga  
atctcaccatgggaagtggagccgctggatgcagctaatccacaatcccctcaacctccactaagggtcaagcgtccacg  
acccccagcttcaccttgtatgggttccggaactgccttccaggttttggtaaggagcacagtaatttttgttatgaaat  
ggttcatcttctagaatgctcagttcatggataccataagcattcttggatgatgaatgtgtagtgctctcctactgtatc  
tgagttcttgtggcattcatgttaggactctggaaatcccccaattgaatcatcctgtacactctcattttcggaaacctca  
acgggctcgagagttatttcttcaatcccacgtcaaccttgtcatcttcatcaaatgtcagtttcaattcaagaatg  
agccgtccatgctaaccagtcagttctactgggtcagcaaggcatacaagagctgactcctgctgctgtagcaccaacaca  
gtcatagttgaaaagaagcaagagccaagtcttgggtgggtttagatgttttggaaatataatgctcagctgaggaaga  
agtattacctgaggttactgctccaggtgttgggtatgagcagactgctgctctgtagagttgactcggataagctct  
ctcagccatctgatgtcaacaattctgatgccctagcagctagcagtgaaacttccctcttgaatcccaaagccggcaa  
gtgaggagctgtaccaaggtgattttatatcac--tacttttt-  
ctcatcatgttctgttcttctgttgggttccactgggtaactgattaatt-  
ttgtgcacacaggttaattatgcaaggaatggcagtttggagggctgtagacctgacaaagcttagtggtcagcgcgatct  
ttgccagaagctggaggagatgtttgacatccagggggagctgggttccacactaaagaaatggcgggtcattttcactg  
atgatgaggacgacatgatgcttgttggagatgatccttgggagtaagaacctttttctctgtatataacgagtgcatgt  
tttccattattttaaagtcctaatccatgtgcaatgcattcttcttccagttagttttgaggatgggtgaaaaggatttaca  
tttacacatatgaggaggcaagaagctgacatccaagtcaaagttaccgggttagcagtgacagcagcaagctgagcgt  
gcaactcactgtctgaatgactatgaacaaaaactgcagagtgctaacgtccctctaattttgttatttccatcatttg  
attatgggggtgaatgctcacgggttgcctcctggtgag-----  
ttgtgggttggcattcaactgccttgagtttggaggcttttggactgccttggcagcatgagcctcctggaagaggcacc  
ctggcatctgctgcccatttccatttgttctgctgcccgttggtaggagatccattggcttatttagcagg--  
tccctgggttgaagaaagaagcggctcagctgcaagatggacggctgccttgcctcttcttgcactacttagctagtaatta  
ggactatgtatgtaatgaatgtatataagtgcattaaagacgcccagcctggattgaggtcccggcatttgtatgaat  
caaattgttc-----ggtaattgttacctttagcagcaacgaacctga-  
gggtgtaggggtggccaggtgggagaagatgtatgtttctttcagtaacaactcttgtgcaagtgatctgtatatagtcta  
ctgttttaataagca-----  
-----atgttgtgcaacttgcgctccta

>Balsas\_Beadle & Kato Site 4\_AY107195

-----ttgtgctcttcactatgcttgaaaattc-----  
-----tagcctttctagattcgtatcta--  
tctcttaattttgatgtaaatctgctccagttatgcataagaaatattctgtgtagttccatttccatt--  
ttagtctcatgcct----  
tctcatgtttctttcagggcaacccaagaggcatcttcttaccaccggctggagtgtctttgttagctcaaaaagattgg  
tttctggggatgcattcatcttcatgaggtacaataccctgattccctgaatccctgagcatgataactgaagaggttg  
gtgcattttgcacctgtcactcagctgttggtttatattggggatgaacttatataattatgtactcattatggattact

ttctactaattattggttcttctgaatggcagaggtgaaaatggtgagctacgggttgggtgtaaggaggctcatgagacaa  
gtaaatagcatgccgtcatcggtcatatcaagccacagcatgcatcttggagatttggccacagcctcccatgccatctc  
cactggaactctcttttctggtttctacaaaccaaggtttgatg-  
tttttttgcctttatctatacatatgtctgcagtgcaacttcttattaatggatgtgcaattgtcctg---  
atgtgactgtactttctggttgcctaatttcactctggtttcaaatttcaaagtcaagttctgtactctgcttttagttgtaaa  
caagctttttgattgttagctactgcatccattgagtgatgtcttatcccttggccctttcattgacacaaagatacacac  
tattgttgccttagtttagcattatcgtgtgcatggtttgtttccttcataatcttgcctgcctaaactttatgctccttt  
atgtgttcccagaactagtcgctctgattttatgtgagtgatgcaacaagtaaccttgaagctaagaagcagaaaaatctg  
ttggaatgaggtttaagatgagatttgaaggtgatgatgctcctgaaagaaggtatgatttggactt-  
catctaaacattttatgtctgggagcaaaattacatttgtctctggttacaggttcagcggaaacaatcattggcatc  
gggagtttggcagcaatgtcaaaatctctgtgggcagattctgactggagatctctaaaggtaatgatgattttttt-  
ctttgttaaattagtagtgctctctgcaa-ttgtgcagagtgatttattatatttattccc--  
atctcccaaatgttaactctaaactgtaagttttaccaggttcaatgggataaaccttcatccattcttctgcctcagataga  
atctcccatgggaagtggagcgcgtggatgcagctaatccacaatcccctcaacctccactaagggctaagcgtccacg  
acccccagcttcaccttgtatgggttccggaactgccttcaggttttggtaaggagcacagtaatttttggttatgaaat  
ggttcatcttctagaatgctcagttcatggataccataagcattcttggatgatgaatgtgatgtgctctcctactgtatc  
tgagttcttgtggcattcatgttaggactctggaaatcccccaattgaatcatcctgtacactctcattttcggaaactca  
acgggctcgagagttatttcttcaatccccacgtcaaccttgtcatcttcatcaaatgtcagtttcaattcaaagaatg  
agccgtccatgctaaccagtcagttctactggtcagcaaggcatacaagagctgactcctgcgctgctagcaccaacaca  
gtcatagttgaaaagaagcaagagccaagttctgggtggtttagatgtttggaattaatataatgctcagctgaggaaga  
agtattacctgaggttactgctccaggtgttgggtatgagcagactgctgcctctgtagagttgactcggataagctct  
ctcagccatctgatgtcaacaattctgatgccctagcagctagcagtgcaacgttcacctcttgaatcccaaagccggcaa  
gtgaggagctgtaccaaggtgattttatcac--tacctttt-  
ctcatcatgttctgttcttgccttgggttcaactgggtaactgattaatg-  
ttgtgcacacaggttaattatgcaaggaatggcagttggaagggctgtagacctgacaaagcttagtggtacagcgatct  
ttgccagaagctggaggagatgtttgacatccagggggagctgagttccacactaaagaaatggcgggtcattttcactg  
atgatgaggatgacatgatgcttgttggagatgatccttgggagtaagaaccttctgtctctgattaaacagagtgcatgt  
tttccattattggaagtcccaatccctgtgcaatgcatcttcttccagtgagttttgcaggatgggtgaaaaggatttaca  
tttacacatacaggagggcaagaagctgacatccaagtcaaagttaccgggttagcagtgacagcagcaagctgagcgt  
gcaactcactgctgaatgactatgaacaaaaactgcagagtgcaacgtccctctaattttgttatttccatcatttg  
attatgggggtgaatgctcacgggtgctccgtgggctgaag-----  
ttgtgggtggcattcaactgccttgagttttggaggcttttggactgccttggcagcatgagcctcctggaagaggcacc  
ctggcatctgcgtgccatttcccatttgttctgctgcccgtttggtaggagatcaattggcttatttagcagg--  
tccctgggttgaagaaagaagcgggtcagctgcaagatggacgggtgccttgcctcttcttgcactacttagctagtaatta  
ggactatgtatgtaatgaatgtatataatgctccatgaagacgcccctgcccgttattgaggtcccggcatttgtatgaat  
caa-ttgttc-----ggtaattgttaccttttagcagcaacgaacctga-  
gggtgtaggggtggccaggtgggagaagatgtatgtttcttccagtaacaatcttggcaagtgatctgtatataatgctca  
ctgttttaataagca-----  
-----atgttgtgcaacttgcgctccta

>Tripsacum\_MIA 34597\_AY107195

gatctccatggcactgaatggcatttttcggcacatttttcgaggtgatctgtgctcttccactatgcttgaaaattcctcc  
tattgaaaaataacctttcttaatttgtatctatctcttaattttgatgtaactgctccagtggtgcataagaaata  
tctctgttagttccattttccattttcttagtctcatgctgcttcccctgcttcttccagggcaaccaagaggcatct  
ccttaccactggctggagtgcttcttggtagctcaaaaagattgggtgctggggatgcatttatcttcatgaggtacaata  
ccctga-----  
ctcctgagcatgataactggagaggtttgggtgcattttgcacttgtcaccagcttttgggtttatattggggatgaact  
tatataattttagtactcgttatggattactttttactaattattgttcttctaaatggcagaggtgaaaatggtgagcta  
cgggttgggtgtaaggaggctcatgagacaagtaataacatgccatcatctgtcatatcaagccacaacatgcatctgg  
agtcttggccacagcctcccatgccatctccactggaacctcttttctggtttctacaaaccaaggtttgataattgtt  
ttgctttatctgtacatataactgcaagtgcaact---  
tactaatggatgtgcaactgctcctgtgattttgactgtactttctatttgcctaatt-  
cactctgtttcaaagttcaaagtcattttctgtactctgcttccagttgtaacaagctttttgattgttagctactgcatcc  
attgagtgatgtcttatcccttgcctcttctgcttgcaccaaagttacacactatgggtgtcctagttagcattattgctg  
gcatgttttgtttccttcataatcttggccgctaaactttatgctccttttattgtgttcccagaactagtcgctctgatt  
ttattgtgagtgtaacaagtaaccttgaagctaagaagcagaacatatactgttggatgaggtttaagatgagattttaa



ggtgatgaggctcctgaaagaaggtatgatttggattttcatttaaacattttatttatgctgggagcaaaattacattt  
gtatctgattacaggttcagtggaacaattattggcatcgggagtttgccagcaatgtcaaaatctctgtgggcagattc  
agactggagatctcctaaaggtaaatgatgattttt--  
cttcgtaaaatttgtagtgtgctatctgcaaattgtgcagagtgattcattatattttatcttctcctaaatgta  
atctaaactgtatgttttaccaggttcaatgggatgaaccttcattcctcgtccagatagaatctcaccatgggaa  
gtggagccactggatgcagctaataccacagtcacctcaacctccattaagggctaagcgtccacgacccccacctcacc  
ttgatggtttcggaactgccttcaggttttggtaaggagtacattaatatttgcctatgaaataggttttagcttctaga  
atgctcagttcatggataaccataagcattcctggatataaatatgatgtgctcctcactgtatctgagttct-  
gtggcattcatgtaggactctggaaatcccccaattgaatcatcctgtacactctcattttcggaaacctcaacgggctag  
agagttatctcctcaacccccacatcaaccttgtcatctcctcaaatgtcagtttcaattcaaagaatgagccgtcca  
tgctaaccagtcagttctactggtcagcaaggcatacaagagctgactcctgcgctgctagcaccaacacaatcatagtt  
gaaaagaagcaagagccaagttctgggtggtgcagattggttggaaattaatataatgctcagctgaggaagaagtattacc  
tgagattactgctccaggtgtgggttatgagcagagtgctgcctctctagagttgaacttggataagctctcacagccat  
ctgatgtcaacaattctgatgcccagcagctagcagtgagcgttcacctcttgaatcacaagcgggaagtgaggagc  
tgtaccaaggtgattttatcacactacta----  
ctcatcttgttctgttcttgccttgggttcaactgattaatgcttgtgcacgcaggttaattatgcaaggaatg  
gcagttggaagggctgtagacctgacaaagcttagtggtacagcgcatttggcagaagttggaggagatggttgacat  
ccagggggagctgggttccacactaaagaaatggcgggtcattttcactgatgatgaggatgacatgatgcttgttggag  
atgatccttgggagtaagaaccttctgctctgtactaacaagttcat-ttt-  
ccattattggaagtcctaatecctgtgcaatgcatctcctccagtgagtttgcagaatgggtgaaaaggatttacattt  
acacatacagaggaggcaagaagctgacatccaagtcgaagctaccgggttagcagtgacagcagcaagctgagcgtggtg  
aactcactgtctgaatgactaccaacaagactgcagagcgtcaacgtccctctaattttgttatttccaccatttgatt  
atgggggtgaaatgcccaacgttgcctcgtgggctgaag-----  
ttgtgggtggcattcaatcgccttgagtttggaggcttttggactgccttggcagcatgagcctcctggaagaggcact  
ctggcatctgcgtgccatttcccatttgccttgccttggtaggagatccattggcttatttagcagg--  
tccctggcttgaagaaagaagcggctcagctgcaagatggacggctgccttgcctcttctcactacttagctagtaatta  
ggactatgtatgtaatgtaatgatatagtgccattaagatgcccatgccctggtagctgaggtcccggcatttgtatgcat  
caa-ttgttc-----ggaattgttatctttagcagcaacgaacctga-gggtgtagg-tggccaggtgggaga--  
-tgtatgttcttccagcaacaatcttgtgcaagtgatctgtatagctactgttt-  
aataagcatgggttttaaatctcccgtatagctgcccgtatctcccgtatagctgttttgaggggaaatagctatttgc  
tctcgtgcacaatttagccgctattaccgctatagccctatttagccgctatagctgtttgaggaggccaatcgcta  
aatgccatagctcgtattttaaactggttaata-----

>Tripsacum\_WW-2120\_haplotype1\_AY107195

gatctccatggcactgaatggcattttcggcacattttcagaggtgacctgtgctcttccactatgcttgaanaattcctcc  
tattgaaaaatagcctttcttaatttgtatctatctcttaattttgatgtaatctgctccagtggtgcataagaaata  
ttttgtgtagttccatttccatttcttagtctcatgcctgccttccaatgtttcttccagggcaacccaagaggcactc  
ccttaccactggctggagtgcttttgttagctcaaaaagattgggtgctggggatgcatttgtcttcatgaggtacaata  
ccctga-----  
ctcctgagcatgataactggagaggtttgggtgcattttgcacttgtcaccagcttttgggtttatattggggatgaact  
tatataatttatgtactcgttatggattacttttactaattattgttcttctgaatggcagaggtgaaaatgggtgagcta  
cgggttgggtgtaaggaggctcatgagacaagtaataacatgccatcatctgtcatatcaagccacaacatgcatcttgg  
agtcttggccacagcctcccagcctcctcactggaacctcttttctgttttctacaaaccaaggtttgataattggt  
ttgctttatctatacatatgactgcagtgcaacttcttattaatggatgtgcaactgtcctgtgtatttgactgtacttct  
tatttgctaatt-  
cactctgtttcaaaccttcaagctcatttctgtactctgcttcagttgtaacaagcttttggattgtagctactgcattcc  
attgggtgatgtcttatcccttgcctccttctcgttgcaccaaagttacacactatgggtgtcctagttagcattattgcgt  
gcatgttttgtttccttataatcttggccgctaaactttatgctccttttatgtgttcccagaactagtcgctctgatt  
ttatgtgagtgtaacaagctaccttgaagctaaagaagcagaatataatctgttggaaatgagatttaagatgagatttgaa  
gggtgatgaggctcctgaaagaaggtatgatttggattttcatttaaacattttatttatgctgggagcaaaattacattt  
gtctctgattacaggttcagtggaacaattattggcatcgggagtttgccagcaatgtcaaaatctctgtgggcagattc  
agactggagatctcctaaaggtaaatgatgattttt--  
cattgttaaatttgtagtgtgctatctgcaaattgtgcagagtgattcattatattttatcttctcctaaatgta  
atctaaactgtatgttttaccaggttcaatgggatgaaccttcattcctcgtccagatagaatctcaccatgggaa  
gtggagccactggatgcagctaataccacagtcacctcaacctccattaagggctaagcgtccacgacccccacctcacc  
ttgatggtttcggaactgccttcaggttttggtaaggagtacatcaatatttgcctatgaaataggttttagcttctaga  
atgctcagttcatggataaccataagcattcctggatataaatatgatgtactcctcactgtatctgagttct-

gtggcattcatgttaggactctggaaatccccaatcgaatcatcctgtacactctcattttcggaacctcaacgggctag  
agagttatctcctaaaatccccacgtcaaccttgtcatcttcatcaaagtgcagtttcaattcaaagaatgagccatcca  
tgctaaccagtcagtttactgggtcagcaatgcatacaagagctgactcctgcgctgctagcaccaacagagtcatagtt  
gaaaagaagcaagagccaagttctgggtgggtgcagattggttgggaattaatataatgctcagctgaggaagaagattacc  
tgaggttactgctccaggtggttgggttatgagcagactactgcctctgtagagttgaactcggataagctctcacagccat  
ctgatgtcaacaattctgatgccccagcagctagcagtgagcgttcacctcttgaatcccaaagccggcaagtgaggagc  
tgtaccaaggtgattttatatcacactacttttttctcatcttgttctgttcttctgcttgtgggtcactgggtaactgatt  
aatg-  
ttgtgcacacaggttaattatgcaaggaatggcagttggaagggctgtagacctgacaaagcttagtgggtcacagcgtct  
ttgccagaagttggaggagatggttgacatccagggggagctgggttccacactaaagaaatggcgggtcattttcactg  
atgatgaggatgacatgatgcttgttggagatgatccttgggagtaagaaccttctgctctctgtactaacgagtacat-  
ttttcgattattgaaagtcctaaccctgtgcaatgcactcttcttccagtgcagtttgcagaatgggtgaaaaggtttac  
atttacacatatgaggaggcaagaagctgacatccaagtcaaagttaccgggttagcagcagcagcagcaagctgagcgc  
tgtgaactcactgtctgaatgacgatcagcaagactgcagagtgctaacgtccctctaattttgttattttccaccattt  
gattatgggggtgaaatgcccatcggttgcctcgggtggaag-----  
ttgtgggtggcattcaattgccttgagtttggaggcttttggactgccttggcagcatgagcctcctggaagaggcact  
ctggcatctgcgtgccattttccatttctgtctgtgcccgttggtaggggtatccattggcttatttagcaggggtccctgg  
tttgaagaaagaagtggtcagctgcaagatggacgggtgccttgcctcttcttgcactacttagctagtaattaggactat  
gtatgtaatgaatgtatatagtgccatgaagatgcccatgccctgggtattgaggtcccggcatttgtatgcatcaa-  
ttgttg-----ggtaattgttatcttttagcagcaacgaacctaaaggggtgtagg-tggccaggtgggaga---  
tgtatgtttctttcagcaacaatatttgtgcaagtgatctgtatatagctctactgttt-aata-----  
-----  
-----  
-----

>Tripsacum\_WW-2120\_haplotype2\_AY107195

gatctccatggcactgaatggcatttttcggcacatttttcgaggtgacctgtgctcttccactatgcttgaaaattcctcc  
tattgaaaaatagcctttcttaatttgtatctatatctcttaattttgatgtaatctgctccagtggtgcataagaaata  
ttttgtgtagttccatttccattttcttagtctcatgcctgccttccaatgtttctttcagggcaacccaagaggcatct  
ccttaccactggctggagtgcttttgttagctcaaaaagattgggtgctggggatgcatttgtcttcatgaggtacaata  
ccctga-----  
ctcctgagcatgataactggagaggtttgggtgcattttgcacttgtcaccagcttttgggtttatattggggatgaact  
tatatatttatgtactcgttatggattactttttactaattattgttcttctgaatggcagaggtgaaaatgggtgagcta  
cgggttgggtgtaaggaggtcatgagacaagtaataacatgccatcatctgtcatatcaagccacaacatgcatcttgg  
agtcttggccacagcctcccatgccatctccactggaacctcttttctgttttctacaaaccaaggtttgataaattgtt  
ttgctttatctatacatatgactgcagtgcaacttcttattaatggatgtgcaactgtcctgtgtatttgactgtacttct  
tatttgctaatt-  
cactctgtttcaaacttcaaagtcattttctgtactctgcttcagttgtaacaagctttttgattgtagctactgcatcc  
attgggtgatgtcttatcccttgcctcttctcgttgcaccaaagttacacactatgggtgtcctagttagcattattgctg  
gcatgttttgtttccttcataatcttgcctcgttaaactttatgctccttttatgtgttcccagaactagtcgctctgatt  
ttattgtgagtgtaacaagtaccttgaagctaagaagcagaatataatctgttggaaatgagatttaagatgagatttgaa  
gggtgatgaggctcctgaaagaaggtatgatttggattttcatttaaacattttatttatgctgggagcaaaattacattt  
gtctctgattacaggttcagtggaacaattattggcatcgggagtttggcagcaatgtcaaaaatctctgtgggcagattc  
agactggagatctctaaaggtaatgatgatttttt--  
cattgttaaatttgtagtgctatctgcaaatgtgagagtgattcattatattttcttctcctaaatgttta  
atctaaactgtatgtttaccaggttcaatgggatgaaccttcatccattcttctcgtccagatagaatctcaccatgggaa  
gtggagccactggatgcagctaatccacagctcccctcaacctccatgaagggtcagcgtccacgacccccaccttacc  
ttgtatgggttcggaactgccttcaggttttggtaaggagtagcatcaatatttgcctatgaaatattgggttagcttctaga  
atgctcagttcatggataaccataagcatttctggatataatgatgtactctcctactgtatctgagttct-  
gtggcattcatgttaggactctggaaatccccaatcgaatcatcctgtacactctcatttttcggaacctcaacgggctag  
agagttatctcctaaaatccccacgtcaaccttgtcatcttcatcaaagtgcagtttcaattcaaagaatgagccatcca  
tgctaaccagtcagtttactgggtcagcaatgcatacaagagctgactcctgcgctgctagcaccaacagagtcatagtt  
gaaaagaagcaagagccaagttctgggtgggtgcagattggttgggaattaatataatgctcagctgaggaagaagattacc  
tgaggttactgctccaggtggttgggttatgagcagactactgcctctgtagagttgaactcggataagctctcacagccat  
ctgatgtcaacaattctgatgccccagcagctagcagtgagcgttcacctcttgaatcccaaagccggcaagtgaggagc  
tgtaccaaggtgattttatatcacactacttttttctcatcatggttctgttcttctgcttgtgggtcactgggtaactgatt  
aatg-

ttgtgcacacaggttaattatgcaaggaatggcagttggaagggctgtagacctgacaaagcttagtggctacagcgatct  
ttgccagaagttggaggagatggttgacatccagggggagctgggttccacactaaagaaatggcgggtcattttcactg  
atgatgaggatgacatgatgcttgttggagatgatccttgggagtaagaaccttcgtctctgtactaacgagtacat-  
ttttcgattattgaaagtcctaaccctgtgcaatgcatcttccttcagttagttttgcagaatgggtgaaaaggatttac  
atttacacatatgaggaggcaagaagctgacatccaagtcaaagttaccgggttagcagcgacagcagcaagctgagcgc  
tgtgaactcactgtctgaatgacgatcagcaagactgcagagtgctaacgtccctctaattttgttatttccaccattt  
gattatgggggtgaatgcccatcgttgcctcgtgggctgaag-----  
ttgtggttggcattcaattgccttgagtttggaggcttttggactgccttggcagcatgagcctcctggaagaggcact  
ctggcatctgctgcccatttcccatttgcctgctgcccgttggtaggggtatccattggcttatttagcaggggtccctgg  
tttgaagaaagaagtggtcagctgcaagatggacgggtgccttgcctcttcttcgactacttagctagtaattaggactat  
gtatgtaatgaatgtatatagtgccatgaatgcccagcctgggtattgaggtcccggcatttgtatgcatcaa-  
ttggtg-----ggtaattgttatctttagcagcaacgaacctaaaggggtgtagg-tggccaggtgggaga---  
tgtatgtttcttccagcaacaatatttgtgcaagtgatctgtatatagtctactgttt-aata-----  
-----  
-----  
-----

>B73\_AY110109

-----

tcggggactccggcgtcggcaagtccaacctgctctcgcgcttcacgcgcaacgagttcagcctcgagttccaagttccacc  
atcggcgtcgagttcgccaccgcgagcatccacgtcgacgacaaggtcgtcaaggccagatctgggacaccgcccgtca  
ggaaaggtacgaccccccaatccccatccccagatccacctgtgctctgagggcgctcgacccctttatttcccgggt  
atctcatctctgatcgagttccactcgttaccgactgccatgtctgctgctcctagtaggatttctgtagcttagt--  
ttggt-cgggtgccccctcttaa-----cctaattgctggtggcctgggtccattgcacatggacgcaaattaa-----  
ctgcctcgatcaccattagaagaa----  
aaaatggaagaatctgcgctcgttcaattcaattcacatcgtccgtgatcgcacgtgccgtcttcaatctgccacattc  
ctagcaaccagaaacacgctggtgagatcgtgcaggtgtcaggttggttctgctagatatgaaattatggttggtgaggac  
ttgaggtagtgagatagaaatcatagccatagccctgtgct----  
gaactggtcgattgatcaacgggtctatagagacaaaataaaaatactgtagaaaaagtagaagcccggtggattaaagcca  
cttaaaacattgccactcattggtataattgtcactgtgtttatgaattgtgtgctccatccagagtgattgactgctag-  
-ctgtgtgatataggagtaccattgttcatgtggcttctgctgttcaactcttttctgcac----ct-  
cagctaactaatcgtttggt-----  
cgggtcaatgcttctgcaggtaccgtgctatcacgagcgcgactaccgaggagcagtagggggcgtcgtcgtctacgacg  
tcacgcggcacgtcaccttcgagaacgtggagaggtggatgagggagctcagggaccacacggacgccaacatcgtgatc  
atgctggttgggaacaaggcggacctgcgccacctcagggctgtcccgaccgaggacgccaaggccttggccgagagggga  
gaacgccttcttcatggagacgtcggccctggaggcgatgaacgtggagggcgccttcaccgaggtgctcaccagatct  
accacgtcgtgagcaagaaggccctcgacatcggcgatgaccccgagcgcctcccagggggccagaccatcagtgctcggc  
ggcaaggacgatgtgtccgcagtgagaagctctgcctgctgttcgtcttagcttggaaaggggttaggacatgtacttggg  
ttggttgggttacttgtgcagtagagagcgcaggacgtta-  
tttgcagtcaggtccttgagctgtattcatgtgttaccagctgctcgttgatttttggcatttgatacatttaattca  
ttcaggaattcagcctgcgggtatagcttaggga-----cat

>Mo17\_AY110109

-----

tcggggactccggcgtcggcaagtccaacctgctctcgcgcttcacgcgcaacgagttcagcctcgagttccaagttccacc  
atcggcgtcgagttcgccaccgcgagcatccacgtcgacgacaaggtcgtcaaggccagatctgggacaccgcccgtca  
ggaaaggtacgaccccccaatccccatccccagatccacctgtgctctgagggcgctcgacccctttatttcccgggt  
atctcatctctgatcgagttccactcgttaccgactgccatgtctgctgctcctagtaggatttctgtagcttagt--  
ttggt-cgggtgccccctcttaa-----cctaattgctggtggcctgggtccattgcacatggacgcaaattaa-----  
ctgcctcgatcaccattagaagaa----  
aaaatggaagaatctgcgctcgttcaattcaattcacatcgtccgtgatcgcacgtgccgtcttcaatctgccacattc  
ctagcaaccagaaacacgctggtgagatcgtgcaggtgtcaggttggttctgctagatatgaaattatggttggtgaggac  
ttgaggtagtgagatagaaatcatagccatagccctgtgct----

gaactgttcgattgatcaacgggtctatagagacaaaataaaaatactgtagaaaaagtagaagcccgtaggattaaagcca  
cttaaaacattgccactcattgttataattgtcactgtgtttatgaattgtgtgtccatccagagtgattgactgctag-  
-ctgtgtgatataggagtaccattgttcatgtggcttctgctgttcaactcttttctgcac----ct-  
cagctaactaatcgttttgggt-----  
cgggtcaatgcttctgcaggtaccgtgctatcacgagcgcgactaccgcggagcagtagggggcgctcgtcgtctacgacg  
tcacgcggcacgtcaccttcgagaacgtggagaggtggatgagggagctcagggaccacacggacgccaacatcgtgatc  
atgctgggtgggaacaagggtggacctgcgccacctcagggctgtcccgcaccgaggacgccaaggcctttgccgagagggga  
gaacgccttcttcatggagacgtcggccctggagggcgatgaacgtggagggcgcttcaccgaggtgctcaccagatct  
accacgtcgtgagcaagaaggccctcgacatcggcgatgaccccgagcgcctcccagggggccagaccatcagtgctggc  
ggcaaggacgatgtgtccgcagtgagaagtctgctgctgttctgctcttagcttggaaaggggtaggacatgtacttggg  
ttgggttgggttacttgtgagtagagagcgcaggacggtta-  
tttgcagtcaggtccttgagctgtattcatgtgttaccagctgtctcgttgatttttggcatttgatacatttaattca  
ttcaggaattcagcctgcgggtatagcttaggga-----cat

>Oh43\_AY110109

-----  
tcggggactccggcgtcggcaagtccaacctgctctcgcgcttcacgcgcaacgagttcagcctcgagttccaagttccacc  
atcggcgtcgagttcgccacccgcagcatccacgtcgacgacaaggctcgtcaaggccagatctgggacaccgcccgtca  
ggaaaggtagcaccaccaatccccatccccagatccacctgtgctctgcgagggcgcgtcgacccctttatctccgggt  
atctcatctctgatcgagttccactcgttaccgactgccatgtctgcgctcctagtaggatttctgtagcttagt--  
ttgggt-cgggtgccccctcttaa-----cctaattgctgttggcctgggtccattgcacatggacgcaaattaa-----  
ctgcctcgatcaccattagaagaa----  
aaaatggaaagaatctgcgctcgttcaattcaattcacatcgtccgtgatcgcacgtgcccgtcttcaatctgccacattc  
ctagcaaccagaaacacgctgttgagatcgtgcaggtgtcaggttgtttcgctagatatgaaattatgggtgttgaggac  
ttgaggtagtgagtagaaatcatagccatagccctgtgct----  
gaactgttcgattgatcaacgggtctatagagacaaaataaaaatactgtagaaaaagtagaagcccgtaggattaaagcca  
cttaaaacattgccactcattgttataattgtcactgtgtttatgaattgtgtgtccatccagagtgattgactgctag-  
-ctgtgtgatataggagtaccattgttcatgtggcttctgctgttcaactcttttctgcac----ct-  
cagctaactaatcgttttgggt-----  
cgggtcaatgcttctgcaggtaccgtgctatcacgagcgcgactaccgcggagcagtagggggcgctcgtcgtctacgacg  
tcacgcggcacgtcaccttcgagaacgtggagaggtggatgagggagctcagggaccacacggacgccaacatcgtgatc  
atgctgggtgggaacaaggcggacctgcgccacctcagggctgtcccgcaccgaggacgccaaggcctttgccgagagggga  
gaacgccttcttcatggagacgtcggccctggagggcgatgaacgtggagggcgcttcaccgaggtgctcaccagatct  
accacgtcgtgagcaagaaggccctcgacatcggcgatgaccccgagcgcctcccagggggccagaccatcagtgctggc  
ggcaaggacgatgtgtccgcagtgagaagtctgctgctgttctgctcttagcttggaaaggggtaggacatgtacttggg  
ttgggttgggttacttgtgagtagagagcgcaggacggtta-  
tttgcagtcaggtccttgagctgtattcatgtgttaccagctgtctcgttgatttttggcatttgatacatttaattca  
ttcaggaattcagcctgcgggtatagcttaggga-----cat

>HP301\_AY110109

-----  
tcggggactccggcgtcggcaagtccaacctgctctcgcgcttcacgcgcaacgagttcagcctcgagttccaagttccacc  
atcggcgtcgagttcgccacccgcagcatccacgtcgacgacaaggctcgtcaaggccagatctgggacaccgcccgtca  
ggaaaggtagcaccaccaatccccatccccagatccacctgtgctctgcgagggcgcgtcgacccctttatctccgggt  
atctcatctctgatcgagttccactcgttaccgactgccatgtctgcgctcctagtaggatttctgtagcttagt--  
ttgggt-cgggtgccccctcttaa-----cctaattgctgttggcctgggtccattgcacatggacgcaaattaa-----  
ctgcctcgatcaccattagaagaa----  
aaaatggaaagaatctgcgctcgttcaattcaattcacatcgtccgtgatcgcacgtgcccgtcttcaatctgccacattc  
ctagcaaccagaaacacgctgttgagatcgtgcaggtgtcaggttgtttcgctagatatgaaattatgggtgttgaggac  
ttgaggtagtgagtagaaatcatagccatagccctgtgct----  
gaactgttcgattgatcaacgggtctatagagacaaaataaaaatactgtagaaaaagtagaagcccgtaggattaaagcca  
cttaaaacattgccactcattgttataattgtcactgtgtttatgaattgtgtgtccatccagagtgattgactgctag-  
-ctgtgtgatataggagtaccattgttcatgtggcttctgctgttcaactcttttctgcac----ct-  
cagctaactaatcgttttgggt-----  
cgggtcaatgcttctgcaggtaccgtgctatcacgagcgcgactaccgcggagcagtagggggcgctcgtcgtctacgacg  
tcacgcggcacgtcaccttcgagaacgtggagaggtggatgagggagctcagggaccacacggacgccaacatcgtgatc  
atgctgggtgggaacaagggtggacctgcgccacctcagggctgtcccgcaccgaggacgccaaggcctttgccgagagggga

gaacgccttcttcatggagacgtcggccctggaggcgatgaacgtggagggcgcttaccgaggtgctcaccagatct  
accacgtcgtgagcaagaaggccctcgacatcggcgatgaccccgagcgcctcccaggggcccagaccatcagtgctggc  
ggcaaggacgatgtgtccgcagtgagaagtctgcctgctgttcgtcttagcttggaaaggggtaggacatgtacttggg  
ttggttgggttacttgtgcagtagagagcgcaggacgta-  
tttgcagtcaggtccttgagctgtattcatgtgttaccagctgtctcgttgatttttgccatttgatacatttaattca  
ttcaggaattcagcctgcgggt-----

>Ky21\_AY110109

-----

tccccgactccccgctcggcaagtccaacctgctctcgcgcttcacgcgcaacgagttcagcctcgagtcgaagtccacc  
atccccgctcgagttcgccaccccgagcatccacgtcgacgacaaggctcgtcaaggcccagatctgggacaccgcccgtca  
ggaaaggtacgaccccccaatccccatccccagatccacctgtgctctgcgagggcgctcgaccctttatttcccggg  
atctcatctctgatcgagtcactcgttaccgactgccatgtctgcgctcctagtaggatttctgtagcttagt--  
ttggt-cggtgccccctcttaa-----cctaattgctgttggcctggtccattgacatggagcgaattaa-----  
ctgcctcgatcaccattagaagaa----  
aaaatggaaagaatctgcgctcgttcaattcaattcacatcgtccgtgatcgcacgtgccgtcttcaatctgccacattc  
ctagcaaccagaaacacgctgttgagatcgtgcaggtgtcaggttgtttcgctagatatgaaattatggttgttgaggac  
ttgaggtagtgatagaaatcatagccatagccctgtgct----  
gaactgttcgattgatcaacggctctatagagacaaaataaaaatactgtagaaaaagtagaagcccgtggattaaagcca  
cttaaaacattgccactcattgttataattgtcactgtgtttatgaattgtgtgtccatccagagtgattgactgctag-  
-ctgtgtgatataggagtaccattgttcatgtggcttctgctgttcaactcttttctgcac----ct-  
cagctaactaatcgtttggt-----  
cgggcaatgcttctgcaggtaccgtgctatcacgagcgcgactaccgaggagcagtagggggcgctcgtcgtctacgacg  
tcacgcggcacgtcaccttcgagaacgtggagaggtggatgagggagctcagggaccacacggagcgaacatcgtgatc  
atgctggttgggaacaaggtggacctgcgccacctcagggctgtcccgaccgaggacgccaaggcctttgcccagagggga  
gaacgccttcttcatggagacgtcggccctggaggcgatgaacgtggagggcgcttaccgaggtgctcaccagatct  
accacgtcgtgagcaagaaggccctcgacatcggcgatgaccccgagcgcctcccaggggcccagaccatcagtgctggc  
ggcaaggacgatgtgtccgcagtgagaagtctgcctgctgttcgtcttagcttggaaaggggtaggacatgtacttggg  
ttggttgggttacttgtgcagtagagagcgcaggacgta-  
tttgcagtcaggtccttgagctgtattcatgtgttaccagctgtctcgttgatttttgccatttgatacatttaattca  
ttcaggaattcagcctgcgggtatagcttaggga-----cat

>IL14H\_AY110109

-----

tccccgactccccgctcggcaagtccaacctgctctcgcgcttcacgcgcaacgagttcagcctcgagtcgaagtccacc  
atccccgctcgagttcgccaccccgagcatccacgtcgacgacaaggctcgtcaaggcccagatctgggacaccgcccgtca  
ggaaaggtacgaccccccaatccccatccccagatccacctgtgctctgcgagggcgctcgaccctttatttcccggg  
atctcatctctgatcgagtcactcgttaccgactgccatgtctgcgctcctagtaggatttctgtagcttagt--  
ttggt-cggtgccccctcttaa-----cctaattgctgttggcctggtccattgacatggagcgaattaa-----  
ctgcctcgatcaccattagaagaa----  
aaaatggaaagaatctgcgctcgttcaattcaattcacatcgtccgtgatcgcacgtgccgtcttcaatctgccacattc  
ctagcaaccagaaacacgctgttgagatcgtgcaggtgtcaggttgtttcgctagatatgaaattatggttgttgaggac  
ttgaggtagtgatagaaatcatagccatagccctgtgct----  
gaactgttcgattgatcaacggctctatagagacaaaataaaaatactgtagaaaaagtagaagcccgtggattaaagcca  
cttaaaacattgccactcattgttataattgtcactgtgtttatgaattgtgtgtccatccagagtgattgactgctag-  
-ctgtgtgatataggagtaccattgttcatgtggcttctgctgttcaactcttttctgcac----ct-  
cagctaactaatcgtttggt-----  
cgggcaatgcttctgcaggtaccgtgctatcacgagcgcgactaccgaggagcagtagggggcgctcgtcgtctacgacg  
tcacgcggcacgtcaccttcgagaacgtggagaggtggatgagggagctcagggaccacacggagcgaacatcgtgatc  
atgctggttgggaacaagggcgacctgcgccacctcagggctgtcccgaccgaggacgccaaggcctttgcccagagggga  
gaacgccttcttcatggagacgtcggccctggaggcgatgaacgtggagggcgcttaccgaggtgctcaccagatct  
accacgtcgtgagcaagaaggccctcgacatcggcgatgaccccgagcgcctcccaggggcccagaccatcagtgctggc  
ggcaaggacgatgtgtccgcagtgagaagtctgcctgctgttcgtcttagcttggaaaggggtaggacatgtacttggg  
ttggttgggttacttgtgcagtagagagcgcaggacgta-  
tttgcagtcaggtccttgagctgtattcatgtgttaccagctgtctcgttgatttttgccatttgatacatttaattca  
ttcaggaattcagcctgcgggtatagcttaggga-----

>CML247\_AY110109

-----  
tcggggactccggcgtcggcaagtccaacctgctctcgcgcttcacgcgcaacgagttcagcctcgagttccaagttccacc  
atcggcgtcgagttcgccaccgccagcatccacgtcgacgacaaggtcgtcaaggccagatctgggacaccgcccgtca  
ggaaaggtacgaccccccaatccccatccccagatccacctgtgctctgcgagggcgcgtcgaccctttatctccggt  
atctcatctctgatcgagttccactcgttaccgactgccatgtctgctgctcctagtaggattctgttagcttagt--  
ttggt-cggtgccccctcttaa-----cctaattgctgttggcctggtccattgcacatggacgcaaattaa-----  
ctgcctcgatcaccattagaagaa----  
aaaatggaaagaatctgcgctcgttcaattcaattcacatcgtccgtgatcgacgtgcccgtcttcaatctgccacattc  
ctagcaaccagaaacacgctgttgagatcgtgcaggtgtcaggttgtttcgctagatatgaaattatggttgttgaggac  
ttgaggtagtgatagaaatcatagccatagccctgtgct----  
gaactgttcgattgatcaacggctctatagagacaaaataaaaatactgtagaaaaagtagaagcccgtggattaaagcca  
cttaaaacattgccactcattgttataattgtcactgtgtttatgaattgtgtgtccatccagagtgattgactgctag-  
-ctgtgtgatataggagtaccattgttcatgtggcttctgctgttcaactcttttctgcac----ct-  
cagctaactaatcgtttggt-----  
cgggtcaatgcttctgcaggtaccgtgctatcacgagcgcgactaccgcccagcagtagggggcgtcgtcgtctacgacg  
tcacgcggcacgtcaccttcgagaacgtggagaggtggatgagggagctcagggaccacacggacgccaacatcgtgatc  
atgctggttgggaacaagggtggacctgcgccacctcagggctgtcccgaccgaggacgccaaggcctttgcccagagagga  
gaacgccttcttcatggagacgtcggccctggagggcgtgaacgtggagggcgccttcaccgaggtgctcaccagatct  
accacgtcgtgagcaagaaggccctcgacatcggcgtgaccccgacgcctcccagggggccagaccatcagtgctggc  
ggcaaggacgatgtgtccgcagtgagaagtctgcctgctgttcgtcttagcttggaaaggggtaggacatgtacttggg  
ttggttgggttacttgtgcagtagagagcgcaggacgtta-  
tttgcagtcaggtccttgagctgtattcatgtgttaccagctgtctcgttgatTTTTGCCATTTGATACATTTAATTCA  
ttcaggaattcagcctgcgggtatagcttaggga-----ca-

>KUI11\_AY110109

-----  
tcggggactccggcgtcggcaagtccaacctgctctcgcgcttcacgcgcaacgagttcagcctcgagttccaagttccacc  
atcggcgtcgagttcgccaccgccagcatccacgtcgacgacaaggtcgtcaaggccagatctgggacaccgcccgtca  
ggaaaggtacgaccccccaatccccatccccagatccacctgtgctctgcgagggcgcgtcgaccctttatctccggt  
atctcatctctgatcgagttccactcgttaccgactgccatgtctgctgctcctagtaggattctgttagcttagt--  
ttggt-cggtgccccctcttaa-----cctaattgctgttggcctggtccattgcacatggacgcaaattaa-----  
ctgcctcgatcaccattagaagaa----  
aaaatggaaagaatctgcgctcgttcaattcaattcacatcgtccgtgatcgacgtgcccgtcttcaatctgccacattc  
ctagcaaccagaaacacgctgttgagatcgtgcaggtgtcaggttgtttcgctagatatgaaattatggttgttgaggac  
ttgaggtagtgatagaaatcatagccatagccctgtgct----  
gaactgttcgattgatcaacggctctatagagacaaaataaaaatactgtagaaaaagtagaagcccgtggattaaagcca  
cttaaaacattgccactcattgttataattgtcactgtgtttatgaattgtgtgtccatccagagtgattgactgctag-  
-ctgtgtgatataggagtaccattgttcatgtggcttctgctgttcaactcttttctgcac----ct-  
cagctaactaatcgtttggt-----  
cgggtcaatgcttctgcaggtaccgtgctatcacgagcgcgactaccgcccagcagtagggggcgtcgtcgtctacgacg  
tcacgcggcacgtcaccttcgagaacgtggagaggtggatgagggagctcagggaccacacggacgccaacatcgtgatc  
atgctggttgggaacaaggcggacctgcgccacctcagggctgtcccgaccgaggacgccaaggcctttgcccagagagga  
gaacgccttcttcatggagacgtcggccctggagggcgtgaacgtggagggcgccttcaccgaggtgctcaccagatct  
accacgtcgtgagcaagaaggccctcgacatcggcgtgaccccgacgcctcccagggggccagaccatcagtgctggc  
ggcaaggacgatgtgtccgcagtgagaagtctgcctgctgttcgtcttagcttggaaaggggtaggacatgtacttggg  
ttggttgggttacttgtgcagtagagagcgcaggacgtta-  
tttgcagtcaggtccttgagctgtattcatgtgttaccagctgtctcgttgatTTTTGCCATTTGATACATTTAATTCA  
ttcaggaattcagcctgcgggtatagcttagg-----

>M37W\_AY110109

-----  
tcggggactccggcgtcggcaagtccaacctgctctcgcgcttcacgcgcaacgagttcagcctcgagttccaagttccacc  
atcggcgtcgagttcgccaccgccagcatccacgtcgacgacaaggtcgtcaaggccagatctgggacaccgcccgtca  
ggaaaggtacgaccccccaatccccatccccagatccacctgtgctctgcgagggcgcgtcgaccctttatctccggt  
atctcatctctgatcgagttccactcgttaccgactgccatgtctgctgctcctagtaggattctgttagcttagt--  
ttggt-cggtgccccctcttaa-----cctaattgctgttggcctggtccattgcacatggacgcaaattaa-----

ctgcctcgatcaccattagaagaa----  
aaaatggaaagaatctgcgctcgttcaattcaattcacatcgtccgtgatcgcacgtgccgtcttcaatctgccacattc  
ctagcaaccagaaacacgctgttgagatcgtgcaggtgtcaggttggttctgctagatatgaaattatgggtggtgaggac  
ttgaggtagtggatagaaatcatagccatagccctgtgct----  
gaactgttcgattgatcaacgggtctatagagacaaaataaaaatactgtagaaaaagtagaagcccggtggattaaagcca  
cttaaaacattgccactcattgttataattgtcactgtgtttatgaattgtgtgtccatccagagtgattgactgctag-  
-ctgtgtgatataggagtaccattgttcatgtggcttctgctgttcaactcttttctgcac----ct-  
cagctaactaatcgtttggt-----  
cggtaaatgcttctgcaggtaccgtgctatcacgagcgcgtaactaccgaggagcagtagggggcgctcgtcgtctacgacg  
tcacgcggcacgtcaccttcgagaacgtggagaggtggatgagggagctcagggaccacacggacgccaacatcgtgatc  
atgctgggtgggaacaaggtggacctgcgccacctcagggctgtcccgaccgaggacgccaaggcctttgcccagagagggga  
gaacgccttcttcatggagacgtcggccctggagggcgatgaacgtggagggcgcttaccgaggtgctcaccagatct  
accacgtcgtgagcaagaaggccctcgacatcggcgatgaccccgacgcctcccaggggcccagaccatcagtgctcggc  
ggcaaggacgatgtgtccgcagtgagaagctcgcctgctgttcgtcttagcttggaaaggggtaggacatgtacttggg  
ttggttgggttacttgtgcagtagagagcgcaggacgcta-  
tttgagtcaggtccttgagctgtattcatgtgttaccagctgtctcgttgatttttgccatttgatacatttaattca  
ttcaggaattcagcctgcgggtatagcttaggga-----c--

>CML322\_AY110109

-----

tcggggactccggcgtcggcaagtccaacctgctctcgcgcttcacgcgcaacgagttcagcctcgagttccaagtccacc  
atcggcgtcgagttcgccacccgcagcatccacgtcgacgacaaggtcgtcaaggccagatctgggacaccgcgggtca  
ggaaaggtacgaccccccaatccccatccccagatccacctgtgctctgcgagggcgcgtcgaccctttatctccgggt  
atctcatctctgatcgagttccactcgttaccgactgccatgtctgcgctcctagtatggatttctgtagcttagt--  
ttggt-cgggtgccccctcttaa-----cctaattgctgttggcctgggtccattgcacatggacgcaaattaa-----  
ctgcctcgatcaccattagaagaa----  
aaaatggaaagaatctgcgctcgttcaattcaattcacatcgtccgtgatcgcacgtgccgtcttcaatctgccacattc  
ctagcaaccagaaacacgctgttgagatcgtgcaggtgtcaggttggttctgctagatatgaaattatgggtggtgaggac  
ttgaggtagtggatagaaatcatagccatagccctgtgct----  
gaactgttcgattgatcaacgggtctatagagacaaaataaaaatactgtagaaaaagtagaagcccggtggattaaagcca  
cttaaaacattgccactcattgttataattgtcactgtgtttatgaattgtgtgtccatccagagtgattgactgctag-  
-ctgtgtgatataggagtaccattgttcatgtggcttctgctgttcaactcttttctgcac----ct-  
cagctaactaatcgtttggt-----  
cggtaaatgcttctgcaggtaccgtgctatcacgagcgcgtaactaccgaggagcagtagggggcgctcgtcgtctacgacg  
tcacgcggcacgtcaccttcgagaacgtggagaggtggatgagggagctcagggaccacacggacgccaacatcgtgatc  
atgctgggtgggaacaaggtggacctgcgccacctcagggctgtcccgaccgaggacgccaaggcctttgcccagagagggga  
gaacgccttcttcatggagacgtcggccctggagggcgatgaacgtggagggcgcttaccgaggtgctcaccagatct  
accacgtcgtgagcaagaaggccctcgacatcggcgatgaccccgacgcctcccaggggcccagaccatcagtgctcggc  
ggcaaggacgatgtgtccgcagtgagaagctcgcctgctgttcgtcttagcttggaaaggggtaggacatgtacttggg  
ttggttgggttacttgtgcagtagagagcgcaggacgcta-  
tttgagtcaggtccttgagctgtattcatgtgttaccagctgtctcgttgatttttgccatttgatacatttaattca  
ttcaggaattcagcctgcgggtatagcttaggga-----c--

>KUI3\_AY110109

-----

tcggggactccggcgtcggcaagtccaacctgctctcgcgcttcacgcgcaacgagttcagcctcgagttccaagtccacc  
atcggcgtcgagttcgccacccgcagcatccacgtcgacgacaaggtcgtcaaggccagatctgggacaccgcgggtca  
ggaaaggtacgaccccccaatccccatccccagatccacctgtgctctgcgagggcgcgtcgaccctttatctccgggt  
atctcatctctgatcgagttccactcgttaccgactgccatgtctgcgctcctagtatggatttctgtagcttagt--  
ttggt-cgggtgccccctcttaa-----cctaattgctgttggcctgggtccattgcacatggacgcaaattaa-----  
ctgcctcgatcaccattagaagaa----  
aaaatggaaagaatctgcgctcgttcaattcaattcacatcgtccgtgatcgcacgtgccgtcttcaatctgccacattc  
ctagcaaccagaaacacgctgttgagatcgtgcaggtgtcaggttggttctgctagatatgaaattatgggtggtgaggac  
ttgaggtagtggatagaaatcatagccatagccctgtgct----  
gaactgttcgattgatcaacgggtctatagagacaaaataaaaatactgtagaaaaagtagaagcccggtggattaaagcca  
cttaaaacattgccactcattgttataattgtcactgtgtttatgaattgtgtgtccatccagagtgattgactgctag-  
-ctgtgtgatataggagtaccattgttcatgtggcttctgctgttcaactcttttctgcac----ct-  
cagctaactaatcgtttggt-----

cagctaactaatcggttggg-----  
cgggtaatgcttctgcaggtaccgtgctatcacgagcgcgtaactaccgaggagcagtagggggcgctcgtcgtctacgacg  
tcacgcggcacgtcaccttcgagaacgtggagaggtggatgagggagctcagggaccacacggacgccaacatcgtgatc  
atgctgggtgggaacaaggtggacctgcgccacctcagggctgtcccgaccgaggacgccaaggcctttgccgagagggga  
gaacgccttcttcatggagacgtcggccctggaggcgatgaacgtggagggcgcccttcaccgaggtgctcaccagatct  
accacgtcgtgagcaagaaggccctcgacatcggcgatgaccccgagcgcctcccagggggccagaccatcagtgctcggc  
ggcaaggacgatgtgtccgcagtgagaagtctgcctgctgttcgtcttagcttgggaaggggtaggacatgtacttggg  
ttggttgggttacttgtgacgtagagagcgcaggacgta-  
tttgcagtcaggtccttgagctgtattcatgtgttaccagctgtctcgttgatTTTTGCCATTTGATACATTTAATTCA  
ttcaggaattcagcctgcgggtatagcttaggg-----

>NC350\_AY110109

-----

tcggggactccggcgtcggcaagtcacaacctgctctcgcgcttcacgcgcaacgagttcagcctcgagtcacaagtcacc  
atcggcgtcgagttcgccaccgcagcatccacgtcgacgacaaggtcgtcaaggccagatctgggacaccgcgggtca  
ggaaaggtacgaccccccaatccccatccccagatccacctgtgctctgcgagggcgcgtcgaccctttatctccggg  
atctcatctctgatcgagtcactcgttaccgactgccatgtctgcgctcctagtagtgatttctgtagcttagt--  
ttggt-cgggtgccccctcttaa-----cctaattgctgttggcctgggtccattgcacatggacgcaaattaa-----  
ctgcctcgatcaccattagaagaa----  
aaaatggaaagaatctgcgctcgttcaattcaattcacatcgtccgtgatcgcacgtgcccgtcttcaatctgccacattc  
ctagcaaccagaaacacgctgttgagatcgtgcaggtgtcaggttgtttcgctagatatgaaattatgggtgttgaggac  
ttgaggtagtgatagaaatcatagccatagccctgtgct----  
gaactgttcgattgatcaacggctctatagagacaaaataaaaatactgtagaaaaagtagaagcccggtggattaaagcca  
cttaaaacattgccactcattgttataattgtcactgtgtttatgaattgtgtgtccatccagagtgattgactgctag-  
-ctgtgtgatataggagtaccattgttcatgtggcttctgctgttcaactcttttctgcac----ct-  
cagctaactaatcggttggg-----  
cgggtaatgcttctgcaggtaccgtgctatcacgagcgcgtaactaccgaggagcagtagggggcgctcgtcgtctacgacg  
tcacgcggcacgtcaccttcgagaacgtggagaggtggatgagggagctcagggaccacacggacgccaacatcgtgatc  
atgctgggtgggaacaaggtggacctgcgccacctcagggctgtcccgaccgaggacgccaaggcctttgccgagagggga  
gaacgccttcttcatggagacgtcggccctggaggcgatgaacgtggagggcgcccttcaccgaggtgctcaccagatct  
accacgtcgtgagcaagaaggccctcgacatcggcgatgaccccgagcgcctcccagggggccagaccatcagtgctcggc  
ggcaaggacgatgtgtccgcagtgagaagtctgcctgctgttcgtcttagcttgggaaggggtaggacatgtacttggg  
ttggttgggttacttgtgacgtagagagcgcaggacgta-  
tttgcagtcaggtccttgagctgtattcatgtgttaccagctgtctcgttgatTTTTGCCATTTGATACATTTAATTCA  
ttcaggaattcagcctgcgggtatagcttaggga-----c--

>CML69\_AY110109

-----

tcggggactccggcgtcggcaagtcacaacctgctctcgcgcttcacgcgcaacgagttcagcctcgagtcacaagtcacc  
atcggcgtcgagttcgccaccgcagcatccacgtcgacgacaaggtcgtcaaggccagatctgggacaccgcgggtca  
ggaaaggtacgaccccccaatccccatccccagatccacctgtgctctgcgagggcgcgtcgaccctttatctccggg  
atctcatctctgatcgagtcactcgttaccgactgccatgtctgcgctcctagtagtgatttctgtagcttagt--  
ttggt-cgggtgccccctcttaa-----cctaattgctgttggcctgggtccattgcacatggacgcaaattaa-----  
ctgcctcgatcaccattagaagaa----  
aaaatggaaagaatctgcgctcgttcaattcaattcacatcgtccgtgatcgcacgtgcccgtcttcaatctgccacattc  
ctagcaaccagaaacacgctgttgagatcgtgcaggtgtcaggttgtttcgctagatatgaaattatgggtgttgaggac  
ttgaggtagtgatagaaatcatagccatagccctgtgct----  
gaactgttcgattgatcaacggctctatagagacaaaataaaaatactgtagaaaaagtagaagcccggtggattaaagcca  
cttaaaacattgccactcattgttataattgtcactgtgtttatgaattgtgtgtccatccagagtgattgactgctag-  
-ctgtgtgatataggagtaccattgttcatgtggcttctgctgttcaactcttttctgcac----ct-  
cagctaactaatcggttggg-----  
cgggtaatgcttctgcaggtaccgtgctatcacgagcgcgtaactaccgaggagcagtagggggcgctcgtcgtctacgacg  
tcacgcggcacgtcaccttcgagaacgtggagaggtggatgagggagctcagggaccacacggacgccaacatcgtgatc  
atgctgggtgggaacaagggcgacctgcgccacctcagggctgtcccgaccgaggacgccaaggcctttgccgagagggga  
gaacgccttcttcatggagacgtcggccctggaggcgatgaacgtggagggcgcccttcaccgaggtgctcaccagatct  
accacgtcgtgagcaagaaggccctcgacatcggcgatgaccccgagcgcctcccagggggccagaccatcagtgctcggc  
ggcaaggacgatgtgtccgcagtgagaagtctgcctgctgttcgtcttagcttgggaaggggtaggacatgtacttggg



ttggttggttacttgtgcagtagagagcgcaggacgtta-  
tttgcagtcaggtccttgagctgtattcatgtgttaccagctgtctcggttgatttttgccatttgatacatttaattca  
ttcaggaattcagcctgcggt-----

>CML333\_AY110109

-----

tcggggactccggcgtcggcaagtccaacctgctctcgcgcttcacgcgcaacgagttcagcctcgagttccaagtccacc  
atcggcgtcgagttcgccaccgcagcatccacgtcgacgacaaggctcgtcaaggcccagatctgggacaccgcccgtca  
ggaaaggtacgaccccccaatccccatccccagatccacctgtgctctgagggcgcgtcgacccctttatttccgggt  
atctcatctctgatcgagttccactcgttaccgactgccatgtctgctgctcctagtaggatttctgtagcttagt--  
ttggt-cgggtgccccctcttaa-----cctaattgctggttggcctgggtccattgacatggagcgaatataa-----  
ctgcctcgatcaccattagaagaa----  
aaaatggaagaatctgcgctcgttcaattcaattcacatcgtccgtgatcgcacgtgcccgtcttcaatctgccacattc  
ctagcaaccagaaacacgctggtgagatcgtgcaggtgtcaggttggttctgctagatatgaaattatgggtggtgaggac  
ttgaggtagtgagatagaaatcatagccatagccctgtgct----  
gaactggtcgattgatcaacgggtctatagagacaaaataaaaaactgtagaaaaagtagaagcccgtggattaaagcca  
cttaaaacattgcccactcattggttataattgtcactgtgtttatgaattgtgtgtccatccagagtgattgactgctag-  
-ctgtgtgatataggagtaccattgttcatgtggcttctgctgttcaactcttttctgcac----ct-  
cagctaactaatcgtttggt-----  
cggtaaatgcttctgcaggtaccgtgctatcacgagcgcgtaactaccgaggagcagtagggggcgtcgtcgtctacgacg  
tcacgcggcacgtcaccttcgagaacgtggagaggtggatgagggagctcagggaccacacggacgccaacatcgtgatc  
atgctggttgggaacaaggcggacctgcgccacctcagggctgtcccgaccgaggacgccaaggcctttgcccagagggga  
gaacgccttcttcatggagacgtcggccctggagggcgtgaacgtggagggcgccttcaccgaggtgctcaccagatct  
accacgtcgtgagcaagaaggccctcgacatcggcgtgaccccgagcgcctcccagggggccagaccatcagtgctcggc  
ggcaaggacgatgtgtccgcagtgagaagtctgctgctgttctgctttagcttggaaaggggtaggacatgtacttggg  
ttggttggttacttgtgcagtagagagcgcaggacgtta-  
tttgcagtcaggtccttgagctgtattcatgtgttaccagctgtctcggttgatttttgccatttgatacatttaattca  
ttcaggaattcagcctgcggttatagcttaggga-----cat

>Balsas\_INIFAP JSG y LOS 109\_AY110109

-----

gggactccggcgtcggcaagtccaacctgctctcgcgcttcacgcgcaacgagttcagcctcgagttccaagtccaccatc  
ggcgtcgagttcgccaccgcagcatccacgtcgacgacaaggctcgtcaaggcccagatctgggacaccgcccgtcagga  
aaggtacgaccccccaatccccatccccagatccacctgtgctctgagggcgcgtcgacccctttatttccgggtatc  
tcatctctgatcgagttccactcgttaccgactgccatgtctgctgctcctagtaggatttctgtagcttagt--ttggt-  
cgggtgccccctcttaa-----cctaattgctggttggcctgggtccattgacatggagcgaatataa-----  
ctgcctcgatcaccattagaagaa----  
aaaatggaagaatctgcgctcgttcaattcaattcacatcgtccgtgatcgcacgtgcccgtcttcaatctgccacattc  
ctagcaaccagaaacacgctggtgagatcgtgcaggtgtcaggttggttctgctagatatgaaattatgggtggtgaggac  
ttgaggtagtgagatagaaatcatagccatagccctgtgct----  
gaactggtcgattgatcaacgggtctatagagacaaaataaaaaactgtagaaaaagtagaagcccgtggattaaagcca  
cttaaaacattgcccactcattggttataattgtcactgtgtttatgaattgtgtgtccatccagagtgattgactgctag-  
-ctgtgtgatataggagtaccattgttcatgtggcttctgctgttcaactcttttctgcac----ct-  
cagctaactaatcgtttggt-----  
cggtaaatgcttctgcaggtaccgtgctatcacgagcgcgtaactaccgaggagcagtagggggcgtcgtcgtctacgacg  
tcacgcggcacgtcaccttcgagaacgtggagaggtggatgagggagctcagggaccacacggacgccaacatcgtgatc  
atgctggttgggaacaaggcggacctgcgccacctcagggctgtcccgaccgaggacgccaaggcctttgcccagagggga  
gaacgccttcttcatggagacgtcggccctggagggcgtgaacgtggagggcgccttcaccgaggtgctcaccagatct  
accacgtcgtgagcaagaaggccctcgacatcggcgtgaccccgagcgcctcccagggggccagaccatcagtgctcggc  
ggcaaggacgatgtgtccgcagtgagaagtctgctgctgttctgctttagcttggaaaggggtaggacatgtacttggg  
ttggttggttacttgtgcagtagagagcgcaggacgtta-  
tttgcagtcaggtccttgagctgtattcatgtgttaccagctgtctcggttgatttttgccatttgatacatttaattca  
ttcaggaattcagcctgcggttatagcttaggga-----cat

>Balsas\_USDA PI566686\_AY110109

-----

gggactccggcgtcggcaagtccaacctgctctcgcgcttcacgcgcaacgagttcagcctcgagttccaagtccaccatc

ggcgtcgagttcgccaccgagcagcatccacgtcgacgacaaggtcgtcaaggcccagatctgggacaccgcccgggtcagga  
aaggtacgaccccccaatcccccatccccagatccacctgtgctctgcgaggcgcgctcgaccctttatctcccggtatc  
tcatctctgatcgagtcactcgttaccgactgccatgtctgctcctagtaggatttctgtagcttagt--ttggt-  
cggtgccccctcttaa-----cctaattgctgttggcctggtccattgcacatggacgcaaattaa-----  
ctgcctcgatcaccattagaagaa----  
aaaatggaaagaatctgcgctcgttcaattcaattcacatcgtccgtgatcgcacgtgcccgtcttcaatctgccacattc  
ctagcaaccagaaacacgctgttgagatcgtgcaggtgtcaggttgtttcgctagatatgaaattatggttgttgaggac  
ttgaggtagtgatagaaatcatagccatagccctgtgct----  
gaactgttcgattgatcaacggctctatagagacaaaataaaaatactgtagaaaaagtagaagcccgtggattaaagcca  
cttaaaacattgccactcattgttataattgtcactgtgtttatgaattgtgtgtccatccagagtgattgactgctag-  
-ctgtgtgatataggagtaccattgttcatgtggcttctgctgttcaactcttttctgcac----ct-  
cagctaactaatcgtttgggt-----  
cggtaaatgcttctgcaggtaccgtgctatcacgagcgcgactaccgaggagcagtagggggcgctcgtcgtctacgacg  
tcacgcggcacgtcaccttcgagaacgtggagaggtggatgagggagctcagggaccacacggacgccaacatcgtgatc  
atgctggttgggaacaaggcggacctgcgccacctcagggctgtcccgcaccgaggacgccaaggcctttgccgagagggga  
gaacgccttcttcatggagacgtcggccctggaggcgatgaacgtggagggcgcttaccgaggtgctcaccagatct  
accacgtcgtgagcaagaaggccctcgacatcggcgatgaccccgagcgcctcccagggggccagaccatcagtgctcggc  
ggcaaggacgatgtgtccgcagtgagaagtctgcctgctgttctgcttagcttggaaaggggtaggacatgtacttggg  
ttggttgggttacttgtgcagtagagagcgcaggacgtta-  
tttgcagtcaggtccttgagctgtattcatgtgttaccagctgtctcgttgatttttgccatttgatacatttaattca  
ttcaggaattcagcctgcgggtatagcttaggga-----cat

>Jalisco\_INIFAP JSG y MAS 401\_AY110109

-----  
acctgctctcgcgcttccacgcgcaacgagttcagcctcgagtcacaagtcaccatcggcgtcgagttcgccaccgagc  
atccacgtcgacgacaaggtcgtcaaggcccagatctgggacaccgcccgggtcaggaagggtacgaccccccaatccccat  
ccccagatccacctgtgctctgcgaggcgcgctcgaccctttatctcccggtatctcatctctgatcgagtcactcgt  
taccgactgccatgtctgctcctagtaggatttctgtagcttagt--ttggt-cggtgccccctcttaa-----  
cctaattgctgttggcctggtccattgcacatggacgcaaattaa-----ctgcctcgatcaccattagaagaa----  
aaaatggaaagaatctgcgctcgttcaattcaattcacatcgtccgtgatcgcacgtgcccgtcttcaatctgccacattc  
ctagcaaccagaaacacgctgttgagatcgtgcaggtgtcaggttgtttcgctagatatgaaattatggttgttgaggac  
ttgaggtagtgatagaaatcatagccatagccctgtgct----  
gaactgttcgattgatcaacggctctatagagacaaaataaaaatactgtagaaaaagtagaagcccgtggattaaagcca  
cttaaaacattgccactcattgttataattgtcactgtgtttatgaattgtgtgtccatccagagtgattgactgctag-  
-ctgtgtgatataggagtaccattgttcatgtggcttctgctgttcaactcttttctgcac----ct-  
cagctaactaatcgtttgggt-----  
cggtaaatgcttctgcaggtaccgtgctatcacgagcgcgactaccgaggagcagtagggggcgctcgtcgtctacgacg  
tcacgcggcacgtcaccttcgagaacgtggagaggtggatgagggagctcagggaccacacggacgccaacatcgtgatc  
atgctggttgggaacaaggcggacctgcgccacctcagggctgtcccgcaccgaggacgccaaggcctttgccgagagggga  
gaacgccttcttcatggagacgtcggccctggaggcgatgaacgtggagggcgcttaccgaggtgctcaccagatct  
accacgtcgtgagcaagaaggccctcgacatcggcgatgaccccgagcgcctcccagggggccagaccatcagtgctcggc  
ggcaaggacgatgtgtccgcagtgagaagtccgcctgctgttctgcttagcttggaaaggggtaggacatgtacttggg  
ttggttgggttacttgtgcagtagagagcgcaggacgtta-  
tttgcagtcaggtccttgagctgtattcatgttttaccagctgtctcgttgatttttgccatttgatacatttaattca  
ttcaggaattcagcctgcgggtatagcttaggga-----cat

>Jalisco\_Benz 967\_AY110109

-----  
ggactccggcgctcggcaagtcacaacctgctctcgcgcttccacgcgcaacgagttcagcctcgagtcacaagtcaccatcg  
gcgtcgagttcgccaccgagcagcatccacgtcgacgacaaggtcgtcaaggcccagatctgggacaccgcccgggtcagga  
aggtagaccccccaatcccccatccccagatccacctgtgctctgcgaggcgcgctcgaccctttatctcccggtatct  
catctctgatcgagtcactcgttaccgactgccatgtctgctcctagtaggatttctgtagcttagt--ttggt-  
cggtgccccctcttaa-----cctaattgctgttggcctggtccattgcacatggacgcaaattaa-----  
ctgcctcgatcaccattagaagaa----  
aaaatggaaagaatctgcgctcgttcaattcaattcacatcgtccgtgatcgcacgtgcccgtcttcaatctgccacattc  
ctagcaaccagaaacacgctgttgagatcgtgcaggtgtcaggttgtttcgctagatatgaaattatggttgttgaggac  
ttgaggtagtgatagaaatcatagccatagccctgtgct----

gaactgttcgattgatcaacgggtctatagagacaaaataaaaaactgtagaaaaagtagaagcccgtagattaaagcca  
cttaaaacattgccactcattgttataattgtcactgtgtttatgaattgtgtgtccatccagagtgattgactgctag-  
-ctgtgtgatataggagtaccattgttcatgtggcttctgctgttcaactcttttctgcac----ct-  
cagctaactaatcgttttgggt-----  
cgggtcaatgcttctgcaggtaccgtgctatcacgagcgcgactaccgcggagcagtagggggcgctcgtcgtctacgacg  
tcacgcggcacgtcaccttcgagaacgtggagaggtggatgagggagctcagggaccacacggacgccaacatcgtgatc  
atgctgggttgggaacaaggcggacctgcgccacctcagggctgtcccgcaccgaggacgccaaggcctttgcccagagagga  
gaacgccttcttcatggagacgtcggccctggagggcgatgaacgtggagggcgcttaccagaggtgctcaccagatct  
accacgtcgtgagcaagaaggccctcgacatcggcgatgacccgcagcgcctcccagggggccagaccatcagtgctggc  
ggcaaggacgatgtgtccgcagtgagaagtccgctgctgttctgctcttagcttgggaaggggtaggacatgtacttggg  
ttgggttgggttacttgtgacgtagagagcgcaggacgtta-  
tttgcagtcaggtccttgagctgtattcatgtgttaccagctgtctcgttgatttttggcatttgatacatttaattca  
ttcaggaattcagcctgcgggtatagcttaggga-----cat

>Balsas\_CIMMYT 8783\_AY110109

-----  
ggactccggcgctcggcaagtccaacctgctctcgcgcttcacgcgcaacgagttcagcctcgagttccaagttccaccatcg  
gcgtcgagttcgccacccgcagcatccacgtcgacgacaaggctcgtcaaggcccagatctgggacaccgcccgggtcaggaa  
aggtacgaccccccaatccccatccccagatccacctgtgctctcgcgagggcgctcgacccccctttatctccgggtatct  
catctctgatcgagttccactcgttaccgactgccatgtctcgcgtcctagtagtgatttctgtagcttagt--ttgggt-  
cgggtgccccctcttaa-----cctaattgctgttggcctgggtccattgcacatggacgcaaattaa-----  
ctgcctcgatcaccattagaagaa----  
aaaatggaaagaatctgcgctcgttcaattcaattcacatcgtccgtgatcgcacgtgcccgtcttcaatctgccacattc  
ctagcaaccagaaaccgctggttgagatcgtgcaggtgtcagtttgtttcgctagatatgaaattatgggtgttgaggac  
ttgaggtagtgatagaaatcatagccatagccctgtgct----  
gaactgttcgattgatcaacgggtctacagagacaaaataaaaaactgtagaaaaagtagaagcccgtagattaaacca  
cttaaaacattgccactcattgttataattgtcactgtgtttatgaattgtgtgtccatccagagtgattgactgctag-  
-ctgtgtgatataggagtac-attgttcatgtggcttctgctgttcaactcttttctgcac----ct-  
cagctaactaatcgttttgggt-----  
cgggtcaatgcttctgcaggtaccgtgctatcacgagcgcgactaccgcggagcagtagggggcgctcgtcgtctacgacg  
tcacgcggcacgtcaccttcgagaacgtggagaggtggatgagggagctcagggaccacacggacgccaacatcgtgatc  
atgctgggttgggaacaaggcggacctgcgccacctcagggctgtcccgcaccgaggacgccaaggcctttgcccagagagga  
gaacgccttcttcatggagacgtcggccctggagggcgatgaacgtggagggcgcttaccagaggtgctcaccagatct  
accacgtcgtgagcaagaaggccctcgacatcggcgacgacccgcagcgcctcccagggggccagaccatcagtgctggc  
ggcaaggacgatgtgtccgcgggtgagaagtctgctgctgttctgctcttagcttgggaaggggtaggacatgtacttggg  
ttgggttgggttacttgtgacgtagagagcgcaggacgtta-  
tttgcagtcaggtccttgagctgtattcatgtgttaccagctgtctcgttgatttttggcatttgatacatttaattca  
ttcaggaattcagcctactggtatagcttaggga-----cat

>Balsas\_CIMMYT 11355\_AY110109

-----  
tcggggactccggcgctcggcaagtccaacctgctctcgcgcttcacgcgcaacgagttcagcctcgagttccaagttccacc  
atcggcgctcgagttcgccacccgcagcatccacgtcgacgacaaggctcgtcaaggcccagatctgggacaccgcccgggtca  
ggaaaggtacgaccccccaatccccatccccagatccacctatgctctcgcgagggcgctcgacccccctttatctccgggt  
atctcatctctgatcgggtccactcgttaccgactgccatgtctcgcgtcctagtagtgatttctgtagcttagt--  
ttgggt-cgggtgccccctcttaa-----cctaattgctgttggcctgggtccattgcacatggacgcaaataaa-----  
ctgcctcgatcaccattagaagaa----  
aaaatggaaagaatctgcgctcgttcaattcaattcacatcgtccgtgatcgcacgtgcccgtcttcaatctgccacattc  
ctagcaaccagaaacacgctgttgagatcgtgcaggtgtcagtttgtttcgctagatatgaaattatgggtgttgaggac  
ttgaggtagtgatagaaatcatagccatagccctgtgct----  
gaactgatcgattgatcaacgggtctatggagacaaaataaaaaactgtagaaaaagtagaagcccgtagattaaagcca  
cttaaaacattgccactcattgttataattgtcactgtgtttatgaattgtgtgtccatccagagtgattgactgctag-  
-ctgtgtgatataggagtaccattgttcatgtggcttctgctgttcaactcttttctgcac----ct-  
cagctaactaatcgttttgggt-----  
cgggtcaatgcttctgcaggtaccgtgctatcacgagcgcgactaccgcggagcagtagggggcgctcgtcgtctacgacg  
tcacgcggcacgtcaccttcgagaacgtggagaggtggatgagggagctcagggaccacacggacgccaacatcgtgatc  
atgctgggttgggaacaaggcggacctgcgccacctcagggctgtcccgcaccgaggacgccaaggcctttgcccagagagga

gaacgccttcttcatggagacgtcggccctggaggcgatgaacgtggagggcgcttaccgaggtgctcaccagatct  
accatgctcgtgagcaagaaggccctcgacatcggcgacgaccccgagcgcctcccaggggcccagaccatcagtgctcggc  
ggcaaggacgatgtgtccgcggtgaagaagtctgcctgctgttcgtcttagcttggaaaggggtaggacatgtacttggg  
ttggttgggttacttgtgacgtagagagcgcaggacgta-  
tttgcagtcatggtccttgagctgtattcatgtgttaccagctgtctcgttgatTTTTGCCATTTGATACATTTAATTCA  
ttcaggaattcagcctgctgggtatagcttaggga-----cat

>Balsas\_INIFAP JSP y Lo5130\_AY110109

-----  
tcggggactcgggcgtcggcaagtcacaacctgctctcgcgcttcacgcgcaacgagttcagcctcgagtcacaagtcacc  
atcggcgtcgagttcgccaccgcagcatccacgtcgacgacaaggctcgtcaaggcccagatctgggacaccgcccgtca  
ggaaaggtacgaccccccaatccccatccccagatccacctgtgctctgcgagggcgctcgacccttatttcccggg  
atctcatctctgatcgagtcactcgttaccgactgccatgtctgcgctcctagatggatttctgtagcttagt--  
ttggt-cgggtgccccctcttaa-----cctaattgctggttggcctgggtccattgacatggacgcaaattaa-----  
ctgcctcgatcaccattagaagaa----  
aaaatggaaagaatctgcgctcgttcaattcaattcacatcgtccgtgatcgcacgtgccgtcttcaatctgccacattc  
ctagcaaccagaaacacgctggttgagatcgtgcaggtgtcaggttgtttcgctagatatgaaattatggttgttgaggac  
ttgaggtagtggtatagaaatcatagccatagccctgtgct----  
gaactgttcgattgatcaacggctctatagagacaaaataaaaatactgtagaaaaagtagaagcccgtggattaaagcca  
cttaaaacattgccactcattggttataattgtcactgtgtttatgaattgtgtgtccatccagagtgattgactgctag-  
-ctgtgtgatataggagtaccattggttcatgtggcttctgctgttcaactcttttctgcac----ct-  
cagctaactaatcgtttggt-----  
cgggtcaatgcttctgcaggtaccgtgctatcacgagcgcgactaccgcccagcagtagggggcgctcgtcgtctacgacg  
tcacgcggcacgtcaccttcgagaacgtggagaggtggatgagggagctcagggaccacacggacgccaacatcgtgatc  
atgctggttgggaacaaggcggacctgcgccacctcagggctgtcccgaccgaggacgccaaggccttggcagagagggga  
gaacgccttcttcatggagacgtcggccctggaggcgatgaacgtggagggcgcttaccgaggtgctcaccagatct  
accagctcgtgagcaagaaggccctcgacatcggcgatgaccccgagcgcctcccaggggcccagaccatcagtgctcggc  
ggcaaggacgatgtgtccgcagtgaagaagtctgcctgctgttcgtcttagcttggaaaggggtaggacatgtacttggg  
ttggttgggttacttgtgacgtagagagcgcaggacgta-  
tttgcagtcatggtccttgagctgtattcatgtgttaccagctgtctcgttgatTTTTGCCATTTGATACATTTAATTCA  
ttcaggaattcagcctgcccgggtatagcttaggga-----cat

>Balsas\_INIFAP JSG y LOS 119\_AY110109

-----  
tcgggcgtcggcaagtcacaacctgctctcgcgcttcacgcgcaacgagttcagcctcgagtcacaagtcaccatcggcgt  
cgagttcgccaccgcagcatccacgtcgacgacaaggctcgtcaaggcccagatctgggacaccgcccgtcaggaaaggt  
acgaccccccaatccccatccccagatccacctgtgctctgcgagggcgctcgacccttatttcccgggatctcatc  
tctgatcgagtcactcgttaccgactgccatgtctgcgctcctagatggatttctgtagcttagt--ttggt-  
cgggtgccccctcttaa-----cctaattgctggttggcctgggtccattgacatggacgcaaattaa-----  
ctgcctcgatcaccattagaagaa----  
aaaatggaaagaatctgcgctcgttcaattcaattcacatcgtccgtgatcgcacgtgccgtcttcaatctgccacattc  
ctagcaaccagaaacacgctggttgagatcgtgcaggtgtcaggttgtttcgctagatatgaaattatggttgttgaggac  
ttgaggtagtggtatagaaatcatagccatagccctgtgct----  
gaactgttcgattgatcaacggctctatagagacaaaataaaaatactgtagaaaaagtagaagcccgtggattaaagcca  
cttaaaacattgccactcattggttataattgtcactgtgtttatgaattgtgtgtccatccagagtgattgactgctag-  
-ctgtgtgatataggagtaccattggttcatgtggcttctgctgttcaactcttttctgcac----ct-  
cagctaactaatcgtttggt-----  
cgggtcaatgcttctgcaggtaccgtgctatcacgagcgcgactaccgcccagcagtagggggcgctcgtcgtctacgacg  
tcacgcggcacgtcaccttcgagaacgtggagaggtggatgagggagctcagggaccacacggacgccaacatcgtgatc  
atgctggttgggaacaaggcggacctgcgccacctcagggctgtcccgaccgaggacgccaaggccttggcagagagggga  
gaacgccttcttcatggagacgtcggccctggaggcgatgaacgtggagggcgcttaccgaggtgctcaccagatct  
accagctcgtgagcaagaaggccctcgacatcggcgatgaccccgagcgcctcccaggggcccagaccatcagtgctcggc  
ggcaaggacgatgtgtccgcagtgaagaagtctgcctgctgttcgtcttagcttggaaaggggtaggacatgtacttggg  
ttggttgggttacttgtgacgtagagagcgcaggacgta-  
tttgcagtcatggtccttgagctgtattcatgtgttaccagctgtctcgttgatTTTTGCCATTTGATACATTTAATTCA  
ttcaggaattcagcctgcccgggtatagcttaggga-----cat

>Balsas\_Wilkes Site 6\_AY110109

-----  
tcacgcgcaacgagttcagcctcgagtcacaagtcaccatcggcgtcgagttcgccaccgcgagcatccacgtcgacgac  
aaggtcgtcaaggccagatctgggacaccgcccgtcaggaaaggtacgacccccaatccccatccccagatccacct  
gtgctctgagggcgctcgaccctttatctccgggtatctcatctctgatcgagtcactcgttaccgactgcatgt  
ctgctcctagtaggatttctgtagcttagt--ttggt-cgggtgccccctcttaa-----  
cctaattgctgttggcctgggtccattgcacatggacgcaaattaa-----ctgcctcgatcaccattagaagaa----  
aaaatggaaagaatctgctcgttcaattcaattcacatcgtccgtgatcgacgtgcccgtcttcaatctgccacattc  
ctagcaaccagaaacacgctgttgagatcgtgcaggtgtcaggttgtttcgctagatatgaaattatggttgttgaggac  
ttgaggtagtgatagaaatcatagccatagccctgtgct----  
gaactgttcgattgatcaacgggtctatagagacaaaataaaaatactgtagaaaaagtagaagcccgtggattaaagcca  
cttaaaacattgccactcattgttataattgtcactgtgtttatgaattgtgtgtccatccagagtgattgactgctag-  
-ctgtgtgatataggagtaccattgttcatgtggctctctgctgttcaactatcttctgcac----ct-  
cagctaactaatcgtttggt-----  
cgggtcaatgcttctgcaggtaccgtgctatcacgagcgcgtactaccgaggagcagtaggggcgctcgtcgtctacgacg  
tcacgcggcacgtcaccttcgagaacgtggagaggtggatgagggagctcagggaccacacggacgccaacatcgtgatc  
atgctggttgggaacaaggcggacctgcgccacctcagggctgtcccgaccgaggacgccaaggcctttgccgagagggga  
gaacgccttcttcatggagacgtcggccctggagggcgatgaacgtggagggcgcttaccgaggtgctcaccagatct  
accacgtcgtgagcaagaaggccctcgacatcggcgtgacccgcgagcgcctcccaggggcccagaccatcagtgctggc  
ggcaaggacgatgtgtccgcagtgagaagtctgctgctgttctgcttagcttggaaaggggtaggacatgtacttggg  
ttggttgggttacttgtgcagtagagagcgcaggacgtta-  
tttgcagtcattggtccttgagctgtattcatgtgttaccagctgtctcgttgatttttgccatttgatacatttaattca  
ttcaggaattcagcctgcgggtatagcttagggagtagggacat

>Balsas\_Kato Site 4\_AY110109

-----  
cgtcggcaagtcacaacctgctctcgcgcttcacgcgcaacgaattcagcctcgagtcacaagtcaccatcggcgtcgagtc  
tcgccaccgcgagcatccacgtcgacgacaaggtcgtcaaggccagatctgggacaccgcccgtcaggaaaggtacgac  
ccccaatccccatccccagatccacctgtgctctgagggcgctcgaccctttatctccgggtatctcatctctga  
tcgggtccactcgttaccgggtgccatgtctgctcctagtaggatttctgtagcttagt--ttggt-  
cgggtgccccctcttaa-----cctaattgctgttggcctgggtccattgcacatggacgcaattgaa-----  
ctgcctcgatcaccattagaagaag-  
aaaaaatggaaagaatctgctcgttcaattcaattcacatcgtccgtgatcgacgtgcccgtcttcaatctgccacat  
tcctagcaaccagaaacacgctgttgagatcgtgcaggtgtcaggttgtttcgctagatatgaaattatggtggtg---  
-----tggatagaaatcatagccatagccctgtgct----  
gaactgttcgattgatcaacgggtctatagagacaaaataaaaatactgtagaaaaagtagaagcccgtggattaaagcca  
cttaaaacattgccactcattgttataattgtcactgtgtttatgaattgtgtgtccatccagagtgattgactgctag-  
-ctgtgtgatataggagtaccattgttcatgtggctctctgctgttcaactcttctgcac----ct-  
cagctaactaatcgtttggt-----  
cgggtcaatgcttctgcaggtaccgtgctatcacgagcgcgtactaccgaggagcagtaggggcgctcgtcgtctacgacg  
tcacgcggcacgtcaccttcgagaacgtggagaggtggatgagggagctcagggaccacacggacgccaacatcgtgatc  
atgctggttgggaacaaggcggacctgcgccacctcagggctgtcccgaccgaggacgccaaggcctttgccgagagggga  
gaacgccttcttcatggagacgtcggccctggagggcgatgaacgtggagggcgcttaccgaggtgctcaccagatct  
accacgtcgtgagcaagaaggccctcgacatcggcgtgacccgcgagcgcctcccagaggccagaccatcagtgctggc  
ggcaaggacgatgtgtccgcagtgagaagtctgctgctgttctgcttagcttggaaaggggtaggacatgtacttggg  
ttggttgggttacttgtgcagtagagagcgcaggacgtta-  
tttgcagtcattggtccttgagctgtattcatgtgttaccagctgtctcgttgatttttgccatttgatacatttaattca  
ttcaggaattcagcctgcgggtatagcttaggga-----cat

>Balsas\_INIFAP JSG 374\_AY110109

-----  
ggactcggcgtcggcaagtcacaacctgctctcgcgcttcacgcgcaacgagttcagcctcgagtcacaagtcaccatcg  
gcgtcgagttcgccaccgcgagcatccacgtcgacgacaaggtcgtcaaggccagatctgggacaccgcccgtcaggaa  
aggtacgacccccaatccccatccccagatccacctgtgctctgagggcgctcgaccctttatctccgggtatct  
catctctgatcgagtcactcgttaccgactgcatgtctgctcctagtaggatttctgtagcttagt--ttggt-  
cgggtgccccctcttaa-----cctaattgctgttggcctgggtccattgcacatggacgcaattaa-----  
ctgcctcgatcaccattagaagaa---

aaaaatggaaagaatctgcgctcggttcaattcaattcacatcgtccgtgatcgcacgtgccgtcttcaatctgccacatt  
cctagcaaccagaaacacgctggtgagatcgtgcaggtgtcagtttggttctgctagatatgaaattatgggtggtgagga  
cttgaggtagtggatagaaatcatagccatagccctgtgct----  
gaactggtcgattgatcaacgggtctacagagacaaaataaaaatactgtagaaaaagtagaagcccgtagattaaacca  
cttaaaacattgccactcattggtataattgtcactgtggttatgaattgtgtgtccatccagagtgattgactgctag-  
-ctgtgtgatataggagtaccattggttcatgtggcttctgctgttcaactcttttctgcac----ct-  
cagctaactaatcggttggt-----  
cggtaaatgcttctgcaggtaccgtgctatcacgagcgcgtaactaccgaggagcagtagggggcgctcgtcgtctacgacg  
tcacgcggcacgtcaccttcgagaacgtggagaggtggatgagggagctcagggaccacacggacgccaacatcgtgatc  
atgctggttgggaacaaggcggacctgcgccacctcagggctgtcccgaccgaggacgccaaggccttggcagagagga  
gaacgccttcttcatggagacgtcggccctggagggcagatgaacgtggagggcgcttaccagaggtgctcaccagatct  
accacgtcgtgagcaagaaggccctcgacatcggcgacgaccccgcagcgcctcccaggggacagaccatcagtggtggc  
ggcaaggatgatgtgtcgcggtgaagaagtctgctgctgttctgcttagcttggaaaggggtaggacatgacttggg  
ttggttgggttacttgtgtagtagagcgcaggacgtta-tt-----  
accagctgtctcgttgatttttgcatttgatacatttaattcattcaggaattcagcctgctgggtatagcttaggga--  
-----cat

>Oaxaca\_INIFAP JSG 197\_AY110109

-----  
gcgtcggcaagtccaacctgctctcgcgcttcacgcgcaacgagttcagcctcgagttccaagtccaccatcggcgtcgag  
ttcggcaccgcgacatccacgtcgacgacaaggtcgtcaaggccagatctgggacaccgcccgtcaggaaaggtacga  
cccccaatctcccatccccagatccacctgtgctctgcgagggcgcgtcgacccttatttcccggatctcatctctg  
atcgggtccactcgttaccgactgccatgtctgcgctcctagtaggatttctgtagcttatttagttgggtcgggtgcccc  
tcttaa-----cctaattgctggttggcctgggtccattgcacatggacgcaaatgaa-----  
ctgcctcgatcaccattagaagaa--  
aaaaaatggaaagaatctgcgctcggttcaattcaattcacatcgtccgtgatcggacgtgccgtcttcaatctgccacat  
tcctagcaaccagaaacacgctggtgagatcgtgcaggtgtcaggttggttctgctagatatgaaattatgggtggtgagg  
acttgaggtagtggatataaatcatagccatagccctgtgct----  
gaactggtcgattgatcaacgggtctatagagacaaaataaaaatactgtagaaaaagtagaagcccgtaggtagaaagcca  
cttaaaa-----cattggtataattgtcactgtggttatgaattgtgtgtccatccagagtgattgactgctag-  
-ctgtgtgatataggagtaccattggttcatgtggcttctgctgttcaactcttttctgcac----ct-  
cagctaactaatgggttggt-----  
cggtaaatgcttctgcaggtaccgtgctatcacgagcgcgtaactaccgaggagcagtagggggcgctcgtcgtctacgatg  
tcacgcggcacgtcaccttcgagaacgtggagaggtggatgagggagctcagggaccacacggacgccaacatcgtgatc  
atgctggttgggaacaaggcggacctgcgccacctcagggctgtcccgaccgaggacgccaaggccttggcagagagga  
gaacgccttcttcatggagacgtcggccctggagggcagatgaacgtggagggcgcttaccagaggtgctcaccagatct  
accacgtcgtgagcaagaaggccctcgacatcggcgacgaccccgcagcgcctcccaggggacagaccatcagtggtggc  
ggcaaggacgatgtgtcgcggtgaagaagtctgctgctgttctgcttagcttggaaaggggtaggacatgacttggg  
ttggttgggttacttgtgtagtagagcgcaggacgtta-  
tttgcagtcaggtccttgagctgtattcatgtgttaccagctgtctcgttgatttttgcatttgatacatttaattca  
ttcaggaattcagcctactgggtatagcttaggga-----cat

>Balsas\_Beadle & Kato Site 4\_AY110109

-----  
gggactcggcgtcggcaagttccaacctgctctcgcgcttcacgcgcaacgagttcagcctcgagttccaagtccaccatc  
ggcgtcgagttcggcaccgcgacatccacgtcgacgacaaggtcgtcaaggccagatctgggacaccgcccgtcagga  
aaggtacgaccccccaatccccatccccagatccacctgtgctctgcgagggcgcgtcgacccttatttcccggatc  
tcatctctgatcgggtccactcgttaccgactgccatgtctgctcctagtaggatttctgtagcttagt--ttggt-  
cgggtccccctcttaa-----cctaattgctggttggcctgggtccattgcacatggacgcaaatgaa-----  
ctgcctcgatcaccattagaagaag-  
aaaaaatggaaagaatctgcgctcggttcaattcaattcacatcgtccgtgatcgcacgtgccgtcttcaatctgccacat  
tcctagcaaccagaaacacgctggtgagatcgtgcaggtgtcaggttggttctgctagatatgaaattatgggtggtgagg  
acttgaggtagtggatagaaatcatagccatagccctgtgct----  
gaactggtcgattgatcaacgggtctatagagacaaaataaaaatactgtagaaaaagtagaagcccgtaggtagaaagcca  
cttaaaacattgccactcattggtataattgtcactgtggttatgaattgtgtgtc-----gactgctag-  
-ctgtgtgatataggagtaccattggttcatgtggcttctgctgttcaactcttttctgcac----ct-  
cagctaactaatgggttggt-----

cggtcaatgcttctgcaggtaccgtgctatcacgagcgcgactaccgcgaggcagtaggggcgctcgtcgtctacgatg  
tcacgcggcacgtcaccttcgagaacgtggagaggtggatgagggagctcagggaccacacggacgccaacatcgtgatc  
atgctgggtgggaacaaggcggacctgcgccacctcagggctgtcccgaccgaggacgccaaggcctttgccgagagggga  
gaacgccttctcatggagacgtcggccctggaggcgatgaacgtggagggcgcttaccgaggtgctcaccagatct  
accacgtcgtgagcaagaaggccctcgacatcggcgacgacctgcagcgcctcccaggggcccagaccatcagtgctcggc  
ggcaaggacgatgtgtccgcggtgaagaagtctgcctgctgttcgtcttagcttggaa--  
gggtaggacatgtacttgggttgggttgggttacttgtgcagtagagagcgcaggacgtta-  
tttgagtcaggtccttgagctgtattcatgtgttaccagctgtctcgttgatttttgccatttgatacatttaattca  
ttcaggaattcagcctgctggatagcttaggga-----cat

>Balsas\_INIFAP JSG y LOS 161\_AY110109

-----  
gctctcgcgcttccgacgcaacgagttcagcctcgagttccaagttccaccatcggcgtcgagttcgccaccgcagcatcc  
acgtcgacgacaaggctcgtcaaggcccagatctgggacaccgcccggtcaggaaaggtagcaccccaatccccatcccc  
cagatccacctgtgctctgcgagggcgcgctcgaccctttatctcccggatctcatctctgatcgggtccactcgttacc  
gactgccatgtctgcgctcctagtagtggatttctgtagcttagt--ttggt-  
cggtgccccctcttaagtcttaacctaatcttctgttggcctgggtccattgcacatggacgcaaatgaa-----  
ctgcctcgatcaccattagaagaa----  
aaaatggaagaatctgcgctcgttcaattcaattcacatcgtccgtgatcgcacgtgccgtcttcaatctgccacat--  
--agc--  
cctgtgctgaactgttgagatcgtgcaggtgtcagttgtttcgttagatatgaaattatgggtgttgaggacttgaggt  
agtggatagaaatcatagccatagccctgtgct----  
gaactgttcgattgatcaacggctctatggagacaaaataaaaaactgtagaaaaagtagaagcccgtggattaaagcca  
cttaaaacattgccactcattgttataattgtcactgtgtttatgaattgtgtgtccatccagagtgattgactgctag-  
-ctgtgtgatataggagtaccattgttcatgtggcttctgctgttcaactcttttctgcac----ct-  
cagctaactaatagtttgggt-----  
cggtcaatgcttctgcaggtaccgtgctatcacgagcgcgactaccgcgaggcagtaggggcgctcgtcgtctacgacg  
tcacgcggcacgtcaccttcgagaacgtggagaggtggatgagggagctcagggaccacacggacgccaacatcgtgatc  
atgctgggtgggaacaaggcggacctgcgccacctcagggctgtcccgaccgaggacgccaaggcctttgccgagagggga  
gaacgccttctcatggagacgtcggccctggaggcgatgaacgtggagggcgcttaccgaggtgctcaccagatct  
accacgtcgtgagcaagaaggccctcgacatcggcgatgaccccgagcgcctcccaggggcccagaccatcagtgctcggc  
ggcaaggacgatgtgtccgagtggaagaagtctgcctgctgttcgtcttagcttggaaaggggtaggacatgtacttggg  
ttggttgggttacttgtgcagtagagagcgcaggacgtta-  
tttgagtcaggtccttgagctgtattcatgtgttaccagctgtctcgttgatttttgccatttgatacattt---  
tcattcaggaattcagcctgcccgggtatagcttaggga-----cat

>Tripsacum\_MIA 34597\_AY110109

acctcttcaagggtgggtgctcatcggggactccggcgtcggcaagtccaacctgctctcgcgcttccgacgcaacgagttc  
agcctcgagtcgaagtccaccatcggcgtcgagttcgccaccgcagcatccacgtcgaggacaaggctcgtcaaggccca  
gatctgggacaccgcccggccaggaaaggtagcaccctcgtcccc--  
tccccagatccacctgtgctctgcgagggcgcgctcggccctttatctcccggatctcatctccgatcgggtccactcg  
ttagcgactgccgt-----gtgtggatctctgttagcttagt--ttggt-cgggtggccccc--taa-----  
cctaattgctgttgcctgggtccattgtacatggacgcaaatgaa-----  
ctgcctcgatcaccgttgaaagaaaaaaaaaacggaaggaatttgtgttcgttcaattcaattcacgtcgtccgtgattg  
cacgtaccgtcttcatctgccacattcgttagctatcagaaacatgctgttgagatcgtgcaggtggcaggttgtttcac  
tgggtatgaaattatgggttgttaagg--tt-----  
gtggatagaaatcatagctatagcctgtgccaacgaactgttcgattgatccacgg-----  
-----

-----agtgaccgactgttag--

ctgtgtgataaatgagtagcttacttctcatgtggcttctgcggttcaactattttctgcactgcactgttagctaaacttatc  
gtttgggtactttgggtcgatcgatgcttgtgcaggtaccgtgctatcacaagcgcgactaccgcgaggcagtaggggcg  
tcgtcgtctacgacgtaacgcggcacgtcaccttcgagaacgtggagaggtggatgagggagctcagggaccacacggac  
gccaacattgtgatcatgctgggtcgggaacaaggcggacctgcgccacctcagggcgtcccgaccgaggacgccaaggc  
ctttgcccagagagagaacgcttcttcatggagacgtcggccctggaggcgatgaacgtggaggacgccttaccgagg  
tgctcaccagatctaccgctcgtgagcaagaaggccctcgacatcggcgacgaccccgggcgctcccaggggcccag  
accatcagtgctcggcgggaaggacgacgtgtctgcggtgaagaagtctgcctgctgttcttcttagcttggaa--  
gggtaggacatgtacttgggttgggttatttctgtgcaatagagagcgcaggggcgttacttgcagtcaggtccttga

gctgtattcatgtgttaccaggtgtctcattgatttttgccatttgataca-  
ttaattcattcaggaattcagcctgctggtatagtttaggga-----tat

>Tripsacum\_WW-2120\_AY110109

acctcttcaaggtggtgctcatcggggactccggcgtcggcaagtgcgaacctgctctcgcgcttcacgcgcaacgagttc  
agcctcgagtcacaagtcaccatcggcgtcaggttcgccaccgcagcatccacgtcgaggacaagatcgtcaaggccca  
gatctgggacaccgcggccaggaaaggtacgacccctcgtcccc--  
tccccagatccacctgtgctctgcggggcgcgctcggccctttatctccggcatctcatctccgatcgggtccactcg  
ttagcgactgcccgtgtgtgctc---gtatggatctctgtagcttagt--ttggt-cggtgaccaccctaa-----  
cctagtgtgctgctcctggtctattgcacatggacgcaaatcaaatgaactgcttcgatcagcattgacagaa---  
aaaaatggaaagaatatgcgctc-----attgaattcgcgctc-----  
cgcacgtaccgtcttcaatctgccacattcctagctatcagaacatgctgttgagatcgtgcaggtggcaggttggttt  
gctagatatgaaattatggcagttgagg--tt-----gtgggtagaatcatagccatatccctgtgcc----  
gaactgttccattgatccacgg-----agtgcagaataa-----ttg-----gtatttt---  
gtcact-aaaacattgcc--  
ttcttgttataattgccactgtgtttatgaattgtgggtccatccggagtgactagctgctaggtctgtgtgatatagga  
gtaccattgttcatgtggcttctgcccgttcagctatcttctgactgcactgcagctaacttatcatttggt-----  
cggtcgatgcctctgcaggtaccgtgctatcacgagcgcgactaccgcggagcagtagggggcgtcgtcgtctacgacg  
tcacacgacacgtcaccttcgagaacgtggagaggtggatgagggagctcagggaccacacggacgccaacatcgtgatc  
atgctggtcgggaacaaggcggacctgcgccacctcagggcgtcccgcaccgaggatgccaaggccttcgcccagagaga  
gaacgcttcttcatggagacgtcggccctggaggcgatgaacgtggaggacgccttcaccgaggtgctcaccagatct  
accgctcgtgagcaagaaggccctcgacatcggcgcagccccgcggcgcctcctagggggccagaccatcagtgctcggc  
ggcaaggacgacgtgtctgcgggtgaagaagtctgcctgctgttcgtcttagcttgaa--  
gggtaggacatgtacttgggttgggttacttgtgcagtagagagcgcaggacgttatcttgcagtcaggtccttga  
gctgtattcatgtgttaccaggtgtctcgttgatttt-gccatttgataca-  
ttgattcattcaggaattcagcctgcaggtatagtttaggga-----tat

>B73\_AY105060

tatcagctggaaaccagaagtgaataatcataaggattacctatctttcgtaagaggtgcagtgccacgcagccacgca  
gcaagcactccaaatggttttagaaaaggaggcggctaatccaaataaatccgctgacaacgggaagtcccgtaaaggccaat  
cttgccagagttattgcttcttctgtcatgacatcaatagccaagagaggtccccatcatctagtgtcatcaatcact  
tccctgctgcaaatgatcgaccactggagactatagagtttggatctttgggaccttttgactgcctttatcctcattg  
aagtcaaatggaactactaacacagaagctacaagtaaggtgtttacagatgcctctccatttgtgttacagaggtccag  
ggccgcccgaactgaaaacaggtaatctccaagtgtaaagttcatagcattgaattatacagtgtagactatgcattctt  
gtaagttagcgtaaaatataatagtagaataaataaaaggatatacccagtgctggaggctgatgggtctgagga  
aagaacaatcatcgaggtaataccttctccc-atggagaggg----  
tgcttcaaacctgcaaccgaagacctgcccttgtttaggcata----aaattcaat-----  
aagtatgattggtgtagtatatggggattagggactgtcacagaagaccgatacgt-----  
-----  
gtgtctggcatccagatttgttgttatgtgatagtga-  
ttccatgcacttttacgctacatacaatggctacaattctgtccttatatgaagcatcccgatagttgacttttctattg  
tttcagaccaccaggactttgcaaagtgggagacgaggacgaattccacctcttagagctgggatccgggtgagaactta  
cgtgtaggtctta----  
cggatacaactgatcatagagttagcaaaaggagctgaccagttgagctttgtgcagagttttttgggcccctcataga  
aatgaggattatgcagtggcata----  
gtacagcctaccgtgtaaaatgtcgtcggcccttatcaatctctctctttttcccgtagttgtcactagagttacaccg  
aacaaggtttatacagctaatgttccact-----

>Mo17\_AY105060

tatcagctggaaaccagaagtgaataatcataaggattacctatctttcgtaagaggtgcagtgccacgcagccacgca  
gcaagcactccaaatggttttagaaaaggaggcggctaatccaaataaatccgctgacaacgggaagtcccgtaaaggccaat  
cttgccagagttattgcttcttctgtcatgacatcaatagccaagagaggtccccatcatctagtgtcatcaatcact



tccctgctgcaaagtatcgaccactggagactatagagtttggatccttgggaccttttgcactgcctttatcctcattg  
aagtcaaagtgaactactaacacagaagctacaagtaaggtgtttacagatgcctctccatttgtgttacagaggtccag  
ggccgcccgaactgaaaacaggtaatctccaagtgtaaagttcatagcattgaattatacagtgtagactatgcattcct  
gtaagtgcgtaaaatataatataatagtagaataaaataaaaggatataaccagtgctggaggctgatgggtctgagga  
aagaacaatcatcgaggtaataccttctccc-atggagagggc----

tgcttcaaacctgcaaccgaagacctgcccttgttttaggcata----aaattcaat-----  
aagatgatttgggtgtagtatatggggattagggactgtcacagaagaccgatacgt-----  
-----

gtgtctggcatccagatttgttgttatgtgatagtga-  
ttccatgcacttttacgctacatacaaatggctacaattctgtccttatatgaagcatcccgatagttgacttttctattg  
tttcagaccaccaggactttgcaaagtgggagacgaggacgaatttccacctcttagagctgggatccgggtgagaactta  
cgtgtaggtctta----  
cggatacaactgatcatagagttagcaaaaggagctgaccagttgagccttgtgacagagttttttggggcgcctcataga  
aatgaggattattgcagtggcata----  
gtacagcctaccgtgtaaaatgtcgtcggcccttatcaatctctctcttttcccgtagttgtcactagagttacaccg  
aacaaggtttatacagctaattgttactagtataactt

>CML247\_AY105060

-----  
agctggaaaccagaagtgtataatcataaggattacctatctttcgtaagaggtgcagtgccacgcagccacgcagcaa  
gcactccaaatgggttagaaaaggaggcggctaattcaaataaatccgctgacaacggaagtcccgttaaggccaatcttg  
ccagagttattgcttcttgtcatgacatcaatagccaagagaggtccccatcatctagtgtcatcaatcatacttccc  
tgctgcaaagtatcgaccactggagactatagagtttggatccttgggaccttttgcactgcctttatcctcattgaagt  
caaagtgaactactaacacagaagctacaagtaaggtgtttacagatgcctctccatttgtgttacagaggtccagggcc  
gccgcaactgaaaacaggtaatctccaagtgtaaagttcatagcattgaattatacagtgtagactatgcattcctgtaa  
gtagcgtaaaatataatataatagtagaataaaataaaaggatataaccagtgctggaggctgatgggtctgaggaaga  
acaatcatcgaggtaataccttctccc-atggagagggc----

tgcttcaaacctgcaaccgaagacctgcccttgttttaggcata----aaattcaat-----  
aagatgatttgggtgtagtatatggggattagggactgtcacagaagaccgatacgt-----  
-----  
gtgtctggcatccagatttgttgttatgtgatagtga-  
ttccatgcacttttacgctacatacaaatggctacaattctgtccttatatgaagcatcccgatagttgacttttctattg  
tttcagaccaccaggactttgcaaagtgggagacgaggacgaatttccacctcttagagctgggatccgggtgagaactta  
cgtgtaggtctta----  
cggatacaactgatcatagagttagcaaaaggagctgaccagttgagccttgtgacagagttttttggggcgcctcataga  
aatgaggattattgcagtggcata----  
gtacagcctaccgtgtaaaatgtcgtcggcccttatcaatctctctcttttcccgtagttgtcactagagttacaccg  
aacaaggtttatacagctaattgttactagtataactt

>M37W\_AY105060

-----  
agctggaaaccagaagtgtataatcataaggattacctatctttcgtaagaggtgcagtgccacgcagccacgcagcaa  
gcactccaaatgggttagaaaaggaggcggctaattcaaataaatccgctgacaacggaagtcccgttaaggccaatcttg  
ccagagttattgcttcttgtcatgacatcaatagccaagagaggtccccatcatctagtgtcatcaatcatacttccc  
tgctgcaaagtatcgaccactggagactatagagtttggatccttgggaccttttgcactgcctttatcctcattgaagt  
caaagtgaactactaacacagaagctacaagtaaggtgtttacagatgcctctccatttgtgttacagaggtccagggcc  
gccgcaactgaaaacaggtaatctccaagtgtaaagttcatagcattgaattatacagtgtagactatgcattcctgtaa  
gtagcgtaaaatataatataatagtagaataaaataaaaggatataaccagtgctggaggctgatgggtctgaggaaga  
acaatcatcgaggtaataccttctccc-atggagagggc----

tgcttcaaacctgcaaccgaagacctgcccttgttttaggcata----aaattcaat-----  
aagatgatttgggtgtagtatatggggattagggactgtcacagaagaccgatacgt-----  
-----  
gtgtctggcatccagatttgttgttatgtgatagtga-  
ttccatgcacttttacgctacatacaaatggctacaattctgtccttatatgaagcatcccgatagttgacttttctattg

tttcagaccaccaggactttgcaaagtgggagacgaggacgaatttccacctcttagagctgggatccgggtgagaactta  
cgtgtaggtctta----  
cggatacaactgatcatagagttagcaaaaggagctgaccagttgagctttgtgacagagttttttggggcgctcataga  
aatgaggattattgcagtggcata----  
gtacagcctaccgtgtaaaatgtcgtcggcccttatcaatctctctctttttcccgtagttgtcactagagttacaccg  
aacaaggtttatacagctaattgttcactagtataactt

>IL14H\_AY105060

----

agctggaaaccagaagtgtaataatcataaggattacctatctttcgtaagaggtgcagtgccacgcagccacgcagcaa  
gcactccaaatgggtttagaaaaggaggcgggctaattcaaataaatccgctgacaacggaagtcccgtaaggccaatcttg  
ccagagttattgctttcttctgtcatgacatcaatagccaagagaggtccccatcatctagtgtcatcaatcacttccc  
cctgcaaatgatcgaccactggagactatagagtttggatctttgggaccttttgcactgcctttatcctcattgaagt  
caaatggaactactaacacagaagctacaagtaaggtgtttacagatgcctctccatttgtgttacagaggtccagggcc  
gccgcaactgaaaacaggtaattttccaagtgtaaagttcatagcattgaattatacagtgtagactatgcattcttgtaa  
gtagcgtaaaattaaattaaatagtagaattaaataaaaggatatacccagtgctggaggctgatgggtctgaggaaaga  
acaatcatcgaggtaataccttctccc-atggagagggc----  
tgcttcaaacctgcaaccgaagacctgcccttgttttaggcata----aaattcaat-----  
aagtatgattgggtgtagtatatggggattagggactgtcacagaagaccgatacgt-----  
-----  
-----

gtgtctggcatccagatttgttgttatgtgatagtga-  
ttccatgcacttttacgctacatacaatggctacaattctgtccttatatgaagcatcccgatagttgacttttctattg  
tttcagaccaccaggactttgcaaagtgggagacgaggacgaatttccacctcttagagctgggatccgggtgagaactta  
cgtgtaggtctta----  
cggatacaactgatcatagagttagcaaaaggagctgaccagttgagctttgtgacagagttttttggggcgctcataga  
aatgaggattattgcagtggcata----  
gtacagcctaccgtgtaaaatgtcgtcggcccttatcaatctctctctttttcccgtagttgtcactaga-----  
-----  
-----

>CML69\_AY105060

--

tcagctggaaaccagaagtgtaataatcataaggattacctatctttcgtaagaggtgcagtgccacgcagccacgcagc  
aagcactccaaatgggtttagaaaaggaggcgggctaattcaaataaatccgctgacaacggaagtcccgtaaggccaatct  
tgccagagttattgctttcttctgtcatgacatcaatagccaagagaggtccccatcatctagtgtcatcaatcacttcc  
cctgctgcaaatgatcgaccactggagactatagagtttggatctttgggaccttttgcactgcctttatcctcattgaa  
gtcaaatggaactactaacacagaagctacaagtaaggtgtttacagatgcctctccatttgtgttacagaggtccaggg  
ccgcccgaactgaaaacaggtaattttccaagtgtaaagttcatagcattgaattatacagtgtagactatgcattcttgt  
aagtagcgtaaaattaaattaaatagtagaattaaataaaaggatatacccagtgctggaggctgatgggtctgaggaa  
gaacaatcatcgaggtaataccttctccc-atggagagggc----  
tgcttcaaacctgcaaccgaagacctgcccttgttttaggcata----aaattcaat-----  
aagtatgattgggtgtagtatatggggattagggactgtcacagaagaccgatacgt-----  
-----  
-----

gtgtctggcatccagatttgttgttatgtgatagtga-  
ttccatgcacttttacgctacatacaatggctacaattctgtccttatatgaagcatcccgatagttgacttttctattg  
tttcagaccaccaggactttgcaaagtgggagacgaggacgaatttccacctcttagagctgggatccgggtgagaactta  
cgtgtaggtctta----  
cggatacaactgatcatagagttagcaaaaggagctgaccagttgagctttgtgacagagttttttggggcgctcataga  
aatgaggattattgcagtggcata----  
gtacagcctaccgtgtaaaatgtcgtcggcccttatcaatctctctctttttcccgtagttgtcactagagttacaccg  
aacaaggtttatacagctaattgttca-----  
-----

>KUI3\_AY105060

--

tcagctggaaaccagaagtgtaataatcataaggattacctatctttcgtaagaggtgcagtgccacgcagccacgcagc  
aagcactccaaatgggtttagaaaaggaggcgggctaattcaaataaatccgctgacaacggaagtcccgtaaggccaatct

tgccagagttattgctttcttgtcatgacatcaatagccaagagaggtccccatcatctagtgtcatcaatcatacttc  
cctgctgcaaatgatcgaccactggagactatagagtttggatctttgggaccttttgcactgcctttatcctcattgaa  
gtcaaagtgaactactaacacagaagctacaagtaaggtgtttacagatgcctctccatttgtgttacagaggtccaggg  
ccgcccgaactgaaaacaggtaatcccaagtgtaaagttcatagcattgaattatacagtgtagactatgcattcttgt  
aagtagcgtaaaattaaattaaatagtagaattaaataaaaggatataccagtgctggaggctgatgggtctgaggaaa  
gaacaatcatcgaggtaataccttctccc-atggagagggc----  
tgcttcaaacctgcaaccgaagacctgcccttgtttaggcata----aaattcaat-----  
aagtagatttgggtgtagtataatggggattagggactgtcacagaagaccgatacgt-----  
-----

gtgtctggcatccagatttgttgttatgtgatagtga-  
ttccatgcacttttacgctacatacaaatggctacaattctgtccttatatgaagcatcccgatagttgacttttctattg  
tttcagaccaccaggactttgcaaagtgggagacgaggacgaatctccacctcttagagctgggatccggtgagaactta  
cgtgtaggtctta----  
cggatacaactgatcatagagttagcaaaaggagctgaccagttgagctttgtgcagagttttttggggcgctcataga  
aatgaggattattgcagtggcata----  
gtacagcctaccgtgtaaaatgtcgtcggcccccttatcaatctctctctttttcccgtagttgtcactagagttacaccg  
aacaaggtttatacagctaattgttact-----

>Oh43\_AY105060

tatcagctggaaaccagaagtgtaataatcataaggattacctatctttcgtaagaggtgcagtgccacgcagccacgca  
gcaagcactccaaatgggttagaaaaggagggcggtcaattcaaataaatccgctgacaacggaagtcccgtaaggccaat  
cttgccagagttattgctttcttgtcatgacatcaatagccaagagaggtccccatcatctagtgtcatcaatcatact  
tccctgctgcaaatgatcgaccactggagactatagagtttggatctttgggaccttttgcactgcctttatcctcattg  
aagtaaatggaactactaacacagaagctacaagtaaggtgtttacagatgcctctccatttgtgttacagaggtccag  
ggccgcccgaactgaaaacaggtaatcccaagtgtaaagttcatagcattgaattatacagtgtagactatgcattctt  
gtaagtagcgtaaaattaaattaaatagtagaattaaataaaaggatataccagtgctggaggctgatgggtctgagga  
aagaacaatcatcgaggtaataccttctccc-atggagagggc----  
tgcttcaaacctgcaaccgaagacctgcccttgtttaggcata----aaattcaat-----  
aagtagatttgggtgtagtataatggggattagggactgtcacagaagaccgatacgt-----  
-----

gtgtctggcatccagatttgttgttatgtgatagtga-  
ttccatgcacttttacgctacatacaaatggctacaattctgtccttatatgaagcatcccgatagttgacttttctattg  
tttcagaccaccaggactttgcaaagtgggagacgaggacgaatctccacctcttagagctgggatccggtgagaactta  
cgtgtaggtctta----  
cggatacaactgatcatagagttagcaaaaggagctgaccagttgagctttgtgcagagttttttggggcgctcataga  
aatgaggattattgcagtggcata----  
gtacagcctaccgtgtaaaatgtcgtcggcccccttatcaatctctctctttttcccgtagttgtcactagagttacaccg  
aacaaggtttatacagctaattgttactagataactt

>HP301\_AY105060

--  
tcagctggaaaccagaagtgtaataatcataaggattacctatctttcgtaagaggtgcagtgccacgcagccacgcagc  
aagcactccaaatgggttagaaaaggagggcggtcaattcaaataaatccgctgacaacggaagtcccgtaaggccaatct  
tgccagagttattgctttcttgtcatgacatcaatagccaagagaggtccccatcatctagtgtcatcaatcatacttc  
cctgctgcaaatgatcgaccactggagactatagagtttggatctttgggaccttttgcactgcctttatcctcattgaa  
gtcaaagtgaactactaacacagaagctacaagtaaggtgtttacagatgcctctccatttgtgttacagaggtccaggg  
ccgcccgaactgaaaacaggtaatcccaagtgtaaagttcatagcattgaattatacagtgtagactatgcattcttgt  
aagtagcgtaaaattaaattaaatagtagaattaaataaaaggatataccagtgctggaggctgatgggtctgaggaaa  
gaacaatcatcgaggtaataccttctccc-atggagagggc----  
tgcttcaaacctgcaaccgaagacctgcccttgtttaggcata----aaattcaat-----  
aagtagatttgggtgtagtataatggggattagggactgtcacagaagaccgatacgt-----  
-----

gtgtctggcatccagatttgttgttatgtgatagtga-  
ttccatgcacttttacgctacatacaaatggctacaattctgtccttatatgaagcatcccgatagttgacttttctattg

tttcagaccaccaggactttgcaaagtgggagacgaggacgaatttccacctcttagagctgggatccggtgagaactta  
cgtgtaggtctta----  
cggatacaactgatcatagagttagcaaaaggagctgaccagttgagctttgtgcagagttttttggggcgctcataga  
aatgaggattattgcagtggcata----  
gtacagcctaccgtgtaaaatgtcgtcggccccttatcaatctctctctttttcccgtagttgtcactagagttacaccg  
aacaaggtttatacagctaattgttcactagtata----

>NC350\_AY105060

--

tcagctggaaaccagaagtgtaataatcataaggattacctatctttcgtaagaggtgcagtgccacgcagccacgcagc  
aagcactccaaatgggttagaaaaggaggcggctaattcaaataaatccgctgacaacggaagtcccgtaaggccaatct  
tgccagagttattgctttcttctgtcatgacatcaatagccaagagaggtccccatcatctagtgtcatcaatcactctc  
cctgctgcaaatgatcgaccactggagactatagagtttggatctttgggaccttttgactgcctttatcctcattgaa  
gtcaaatggaactactaacaacagaagctacaagtaaggtgtttacagatgcctctccatttgtgttacagaggtccaggg  
ccgcccgaactgaaaacaggtaatttccaagtgtaaagttcatagcattgaattatacagtgtagactatgcattcttgt  
aagtagcgtaaaattaaattaaatagtagaattaaataaaaggatatacccagtgctggaggctgatgggtctgaggaa  
gaacaatcatcgaggtaataccttctccc-atggagagggc----  
tgcttcaaacctgcaaccgaagacctgcccttgttttaggcata----aaattcaat-----  
aagtatgattgggtgtagtataatggggattagggactgtcacagaagaccgatacgt-----  
-----  
-----

gtgtctggcatccagatttgttgttatgtgatagtga-  
ttccatgcacttttacgctacatacaatggctacaattctgtccttatatgaagcatcccgatagttgacttttctattg  
tttcagaccaccaggactttgcaaagtgggagacgaggacgaatttccacctcttagagctgggatccggtgagaactta  
cgtgtaggtctta----  
cggatacaactgatcatagagttagcaaaaggagctgaccagttgagctttgtgcagagttttttggggcgctcataga  
aatgaggattattgcagtggcata----  
gtacagcctaccgtgtaaaatgtcgtcggccccttatcaatctctctctttttcccgtagttgtcactagagttacaccg  
aacaaggtttatacagctaattgttca-----

>CML333\_AY105060

tNtcagctggaaaccagaagtgtaataatcataaggattacctatctttcgtaagaggtgcagtgccacgcagccacgca  
gcaagcactccaaatgggttagaaaaggaggcggctaattcaaataaatccgctgacaacggaagtcccgtaaggccaat  
cttgccagagttattgctttcttctgtcatgacatcaatagccaagagaggtccccatcatctagtgtcatcaatcact  
tccctgctgcaaatgatcgaccactggagactatagagtttggatctttgggaccttttgactgcctttatcctcattg  
aagtcaaatggaactactaacaacagaagctacaagtaaggtgtttacagatgcctctccatttgtgttacagaggtccag  
ggccgcccgaactgaaaacaggtaatttccaagtgtaaagttcatagcattgaattatacagtgtagactatgcattctt  
gtaagtagcgtaaaattaaattaaatagtagaattaaataaaaggatatacccagtgctggaggctgatgggtctgagga  
aagaacaatcatcgaggtaataccttctccc-atggagagggc----  
tgcttcaaacctgcaaccgaagacctgcccttgttttaggcata----aaattcaat-----  
aagtatgattgggtgtagtataatggggattagggactgtcacagaagaccgatacgt-----  
-----  
-----

gtgtctggcatccagatttgttgttatgtgatagtga-  
ttccatgcacttttacgctacatacaatggctacaattctgtccttatatgaagcatcccgatagttgacttttctattg  
tttcagaccaccaggactttgcaaagtgggagacgaggacgaatttccacctcttagagctgggatccggtgagaactta  
cgtgtaggtctta----  
cggatacaactgatcatagagttagcaaaaggagctgaccagttgagctttgtgcagagttttttggggcgctcataga  
aatgaggattattgcagtggcata----  
gtacagcctaccgtgtaaaatgtcgtcggccccttatcaatctctctctttttcccgtagttgtcactagagttacaccg  
aacaaggtttatacagctaattgttcactagtataactt

>KUI11\_AY105060

tatcagctggaaaccagaagtgtaataatcataaggattacctatctttcgtaagaggtgcagtgccacgcagccacgca  
gcaagcactccaaatgggttagaaaaggaggcggctaattcaaataaatccgctgacaacggaagtcccgtaaggccaat  
cttgccagagttattgctttcttctgtcatgacatcaatagccaagagaggtccccatcatctagtgtcatcaatcact  
tccctgctgcaaatgatcgaccactggagactatagagtttggatctttgggaccttttgactgcctttatcctcattg

aagtcaaactggaactactaacacagaagctacaagtaaggtgtttacagatgcctctccatttgtgttacagaggtccag  
ggccgcccgaactgaaaacaggtaatttccaagtgtaaagttcatagcattgaattatacagtgtagactatgcattctt  
gtaagtagcgtaaaattaaatagtagaattaaataaaaggatatacccagtgctggaggctgatgggtctgagga  
aagaacaatcatcgaggtaataccttctccc-atggagagggc----  
tgcttcaaacctgcaaccgaagacctgcccttggttaggcata----aaattcaat-----  
aagtatgattggtgtagtatatggggattagggactgtcacagaagaccgatacgt-----  
-----

gtgtctggcatccagatttgttggtatgtgatagtga-  
ttccatgcacttttacgctacatacaaatggctacaattctgtccttatatgaagcatcccgatagttgacttttctattg  
tttcagaccaccaggactttgcaaagtgaggagacgaggacgaatttccacctcttagagctgggatccggtgagaactta  
cgtgtaggtctta----  
cggatacaactgatcatagagttagcaaaaggagctgaccagttgagctttgtgcagagttttttggggcgcctcataga  
aatgaggattattgcagtggcata----  
gtacagcctaccgtgtaaaatgtcgtcggcccttatcaatctctctctttttcccgtagttgtcactagagttacaccg  
aacaaggtttatacagctaattgttcactagtataactt

>Ky21\_AY105060

tatcagctggaaaccagaagtgtaataatcataaggattacctatctttcgtaagaggtgcagtgccacgcagccacgca  
gcaagcactccaaatgggttagaaaaggaggcggctaattcaaataaatccgctgacaacggaagtcccgtaaggccaat  
cttgccagagttattgctttcttgtcatgacatcaatagccaagagaggtccccatcatctagtgtcatcaatcact  
tccctgctgcaaatgatcgaccactggagactatagagtttggtatctttgggaccttttgcactgcctttatcctcattg  
aagtcaaactggaactactaacacagaagctacaagtaaggtgtttacagatgcctctccatttgtgttacagaggtccag  
ggccgcccgaactgaaaacaggtaatttccaagtgtaaagttcatagcattgaattatacagtgtagactatgcattctt  
gtaagtagcgtaaaattaaatagtagaattaaataaaaggatatacccagtgctggaggctgatgggtctgagga  
aagaacaatcatcgaggtaataccttctccc-atggagagggc----  
tgcttcaaacctgcaaccgaagacctgcccttggttaggcata----aaattcaat-----  
aagtatgattggtgtagtatatggggattagggactgtcacagaagaccgatacgt-----  
-----

gtgtctggcatccagatttgttggtatgtgatagtga-  
ttccatgcacttttacgctacatacaaatggctacaattctgtccttatatgaagcatcccgatagttgacttttctattg  
tttcagaccaccaggactttgcaaagtgaggagacgaggacgaatttccacctcttagagctgggatccggtgagaactta  
cgtgtaggtctta----  
cggatacaactgatcatagagttagcaaaaggagctgaccagttgagctttgtgcagagttttttggggcgcctcataga  
aatgaggattattgcagtggcata----  
gtacagcctaccgtgtaaaatgtcgtcggcccttatcaatctctctctttttcccgtagttgtcactagagttacaccg  
aacaaggtttatacagctaattgttcactagtataactt

>CML322\_AY105060

tatcagctggaaaccagaagtgtaataatcataaggattacctatctttcgtaagaggtgcagtgccacgcagccacgca  
gcaagcactccaaatgggttagaaaaggaggcggctaattcaaataaatccgctgacaacggaagtcccgtaaggccaat  
cttgccagagttattgctttcttgtcatgacatcaatagccaagagaggtccccatcatctagtgtcatcaatcact  
tccctgctgcaaatgatcgaccactggagactatagagtttggtatctttgggaccttttgcactgcctttatcctcattg  
aagtcaaactggaactactaacacagaagctacaagtaaggtgtttacagatgcctctccatttgtgttacagaggtccag  
ggccgcccgaactgaaaacaggtaatttccaagtgtaaagttcatagcattgaattatacagtgtagactatgcattctt  
gtaagtagcgtaaaattaaatagtagaattaaataaaaggatatacccagtgctggaggctgatgggtctgagga  
aagaacaatcatcgaggtaataccttctccc-atggagagggc----  
tgcttcaaacctgcaaccgaagacctgcccttggttaggcata----aaattcaat-----  
aagtatgattggtgtagtatatggggattagggactgtcacagaagaccgatacgt-----  
-----

gtgtctggcatccagatttgttggtatgtgatagtga-  
ttccatgcacttttacgctacatacaaatggctacaattctgtccttatatgaagcatcccgatagttgacttttctattg  
tttcagaccaccaggactttgcaaagtgaggagacgaggacgaatttccacctcttagagctgggatccggtgagaactta  
cgtgtaggtctta----  
cggatacaactgatcatagagttagcaaaaggagctgaccagttgagctttgtgcagagttttttggggcgcctcataga

aatgaggattattgcagtggcata----  
gtacagcctaccgtgtaaaatgtcgtcggcccttatcaatctctctctttttcccgtagttgtcactagagttacaccg  
aacaaggtttatacagctaattgttcactagtataactt

>Balsas\_INIFAP JSP y Lo5130\_AY105060

tatcagctggaaaccagaagtgtataatcataaggattacctatctttcgttaagaggtgcagtgccacgcagccacgca  
gcaagcactccaaatgatttagaaaaggaggctgctaattcaaataaatctggtgacaacggaagtcccgttaaggccaat  
cttgccagagttattgctttcttgtcatgacatcaatagccaagagagggcccccacatctagtgtcgtcaatcact  
tccctgctgcaaatgatcgaccactggagactatagagtttggatctttgggaccttttgcactgcctttatcctcattg  
aagtcaaatggaactactaacacagaagctacaagtaaggtgtttacagatgcctctccatttgtgttacagaggtccag  
ggccgcccgaactgaaaacaggtaatttccaagtgtaaagttcatagcagtggaattatacagtgtagactatgcattctt  
gcaagtagcataaaaattaaatagtagaattaaataaaaggatataaccagtgctggaggctgatgggtctgagga  
aagaataatcatcgaggtaa-accttctctc-atggagagggc----  
tgcttcaaacctgcaaccgaagacctgcccttgttttaggcata----aaattcaatgtg-  
tataagtatgattggtgtagtatatggggatttagggactgtcacagaagaccgatacgt-----  
-----

gtgtctagcatccagatttgcgtgttatgtgatagtgaattccatgcacttttacgctacatacaaatggctacaattatgt  
ccttatatgaagcatcccgatagttgacttttctattgtttcagaccaccaggactttgcaaagtgaggagacgaggacga  
atctccacctcttagggctgggatccgggtgagaacttacgtgtaggtcttacagacggatacaactgatcatagagttag  
caaaaggagctgaccagttgagctttgtgagagttttcttggggcgcgcgatagaaatgaggatt---  
gcagtgccatacatagtagacaacctaccgtgtaaaatgtcgtcggcccttatcaatctctctctttttcccgtagttgtt  
actagagttacaccaacaaggtttatacagctaattgttcactagtataactt

>Jalisco\_INIFAP JSG y MAS 264\_AY105060

tatcagctggaaaccagaagtgtataatcataaggattacctatctttcgttaagaggtgcagtgccacgcagccacgca  
gcaagcactccaaatgatttagaaaaggaggctgctaattcaaataaatctggtgacaacggaagtcccgttaaggccaat  
cttgccagagttattgctttcttgtcatgacatcaatagccaagagagggcccccacatctagtgtcgtcaatcact  
tccctgctgcaaatgatcgaccactggagactatagagtttggatctttgggaccttttgcactgcctttatcctcattg  
aagtcaaatggaactactaacacagaagctacaagtaaggtgtttacagatgcctctccatttgtgttacagaggtccag  
ggccgcccgaactgaaaacaggtaatttccaagtgtaaagttcatagcagtggaattatacagtgtagactatgcattctt  
gcaagtagcataaaaattaaatagtagaattaaataaaaggatataaccagtgctggaggctgatgggtctgagga  
aagaataatcatcgaggtaa-accttctctc-atggagagggc----  
tgcttcaaacctgcaaccgaagacctgcccttgttttaggcata----aaattcaatgtg-  
tataagtatgattggtgtagtatatggggatttagggactgtcacagaagaccgatacgt-----  
-----

gtgtctagcatccagatttgcgtgttatgtgatagtgaattccatgcacttttacgctacatacaaatggctacaattatgt  
ccttatatgaagcatcccgatagttgacttttctattgtttcagaccaccaggactttgcaaagtgaggagacgaggacga  
atctccacctcttagggctgggatccgggtgagaacttacgtgtaggtcttacagacggatacaactgatcatagagttag  
caaaaggagctgaccagttgagctttgtgagagttttcttggggcgcgcgatagaaatgaggatt---  
gcagtgccatacatagtagacaacctaccgtgtaaaatgtcgtcggcccttatcaatctctctctttttcccgtagttgtt  
actagagttacaccaacaaggtttatacagctaattgttcactagtataactt

>Balsas\_Beadle & Kato Site 4\_AY105060

tatcagctggaaaccagaagtgtataatcataaggattacctatctttcgttaagaggtgcagtgccacgcagccacgca  
gcaagcactccaaatggttttaggaaaggaggcagctaattcaaataaatccgttgacaacggaagtcccgttaaggccaat  
cttgccagagttattgctttcttgtcatgacatcaatagccaagagaggtcccccacatctagtgtcgtcaatcact  
tccctgctgcaaatgatcgaccactggagactatagagtttggatctttgggaccttttgcactgcctttatcctcattg  
aagtcaaatggaactactaacacagaagctacaagtaaggtgtttacagatgcctctccatttgtgttacagaggtccag  
ggccgcccgaactgaaaacaggtaatttccaagtgtaaagttcatagcattgaattatacagtgtagactatgcattctt  
gtaagtagcgtaaaattaaatagtagaattaaataaaaggatataaccagtgctggaggctgatgggtctgagga  
aagaataatcatcgaggtaa-accttctccc-atggagagggc----  
tgcttcaaacctgcaaccgaagacctgcccttgttttaggcata----aaattcaatgag--  
ataagtatgattggtgtagtatatggggatttagggactgtcacagaagaccgatacgt-----  
-----

gtgtctagcatccagatttgctggtatgtgatagtgaattccatgcacttttacgctacatacaatggctacaattatgt  
ccttatatgaagcatcccgatagttgacttttctattgtttcagaccaccaggactttgcaaagtgggagacgaggacga  
atccacactcttagagctgggatccgggtgagaacttacgtgtaggtcttacagacggatacaactgatcatagagttag  
caaaaggagctgaccagttgagctttgtgacagagttttcttgggagctgcatagaaatgaggatt---  
gcagtgccatacatagtagcagcctaccgtgtaaaatgtcgtcggcccccttatcagtcctctctttttcccgtaatgtc  
actagagttacaccgaacaaggtttatacagctaattgttccactagtataactt

>Balsas\_Kato Site 4\_AY105060

tatcagctggaaaccagaagtgtataatcataaggattacctatctttcgtaagaggtgcagtgccacgcagccacgca  
gcaagcactccaaatgatttagaaaaggaggctgctaattcaaataaatccggttgataacggaagtcccgtaggccaat  
cttgccagagttattgctttcttgtcatgacatcaatagccaagagaggccccatcatctagtgtcgtcaatcact  
tcctgctgcaaatgatcgaccactggagactatagagttggatctttgggaccttttgcaactgctttatcctcattg  
aagtcaaatggaactactaacacagaagctacaagtaaggtgtttacagatgcctctccatttgtgttacagaggtccag  
ggccgcccgaactgaaaacaggtaatttccaagtgtaaagttcatagcagtgtaattatacagtgtagactatgcattctt  
gcaagtagcataaaatataatataatagtagaattaaataaaaggatataaccagtgctggaggctgatgggtctgagga  
agaataatcatcgaggtaa-accttctccc-atggagagggc----  
tgcttcaaatctgcaaccgaagacctgcccctgttttaggcata----acattcaatgag--  
ataagtagattgggtgtagtatatggggattagggactgtcacagaagaccgatacgt-----  
-----  
-----

gtgtctagcatccagatttgctggtatgtgatagtgaattccatgcacttttacgctacatacaatggctacaattatgt  
ccttatatgaagcatcccgatagttgacttttctattgtttcagaccaccaggagttgcaaagtgggagacgaggacga  
atccacactcttagggctgggatccgggtgagaacttacgtgtaggtcttacagacggatacaactgatcatagagttag  
caaaaggagctgaccagttgagctttgtgacagagttttcttgggagctgcatagaaatgaggatt---  
gcagtgccatacatagtagcagcctaccgtgtaaaatgtcgtcggcccccttatcaatctctctctttttcccgtagttgtc  
actagagttacaccgaacaaggtttatacagctaattgttccactagtataactt

>Balsas\_INIFAP JSG y LOS 119\_AY105060

taccagctggaaaccagaagtgtataatcataaggattacctatctttcgtaagaggtgcagtgccacgcagccacgca  
gcaagcactccaaatgatttagaaaaggaggctgctaattcaaataaatccggttgacaacggaagtcccgtaggccaat  
cttgccagagttattgctttcttgtcatgacatcaatagccaagagaggccccatcatctagtgtcgtcaatcact  
ttcctgctgcaaatgatcgaccactggagactatagagttggatctttgggaccttttgcaactgctttatcctcattg  
aagtcaaatggaactactaacacagaagctacaagtaaggtgtttacagatgcctctccatttgtgttacagaggtccag  
ggccgcccgaactgaaaacaggtaatttccaagtgtaaagttcatagcattgaattatacagtgtagactatgcattctt  
gcaagtagcataaaatataatataatagtagtattaaataaaaggatataaccagtgctggaggctgatgggtctgagga  
agaataatcatcgaggtaa-accttctccccatggagagggc----  
tgcttcaaacctgcaaccgaagacctgtccttgttttaggcata----  
aaattcaatgtgatataagtagattgggtgtagtatatggggattagggactgtcacagaagaccgatacgt-----  
-----  
-----

gtgtctagcatccagatttgctggtatgtgatagtgaattccatgcactttt-----  
acaatggctacaattctgtccttatatgaagcatcccgtaggtgacttttctattgtttcagaccaccaggactttgca  
aagtgggagacgaggacgaatttccacactcttagagctgggatccgggtgagaacttacatgtaggtcttacagacggata  
caattgatcatagagttagcaaaagaagctgaccagttgagctttgtgacagagttttcttgggtgcccagatagaaacgag  
gatt---gcagtgccata---gtacagcctacctgtaaaatgtcgtcggcccccttatcaatctctct--  
ttttcccgtagttgttactagagttacaccgaacaagatttatacagctaattgttccactagtataactt

>Jalisco\_INIFAP JSG y MAS 401\_AY105060

taccagctggaaaccagaagtgtataatcataaggattacctatctttcgtaagaggtgcagtgccacgcagccacgca  
gcaagcactccaaatgatttagaaaaggaggctgctaattcaaataaatccggttgacaacggaagtcccgtaggccaat  
cttgccagagttattgctttcttgtcatgacatcaatagccaagagaggccccatcatctagtgtcgtcaatcact  
ttcctgctgcaaatgatcgaccactggagactatagagttggatctttgggaccttttgcaactgctttatcctcattg  
aagtcaaatggaactactaacacagaagctacaagtaaggtgtttacagatgcctctccatttgtgttacagaggtccag  
ggccgcccgaactgaaaacaggtaatttccaagtgtaaagttcatagcattgaattatacagtgtagactatgcattctt  
gcaagtagcataaaatataatataatagtagtattaaataaaaggatataaccagtgctggaggctgatgggtctgagga  
agaataatcatcgaggtaa-accttctcccc-  
ggatataaccagtgcttcaaacctgcaaccgaagacctgtccttgttttaggcata----

aaattcaatgtgatataagtatgattggtgtagtatatggggatttagggactgtcacagaagaccgatacgt-----  
-----  
gtgtctagcatccagatttgctgttatgtgatagtgaattccatgcactttt-----  
acaatggctacaattctgtccttatatgaagcatcccgttagttgacttttctattgtttcagaccaccaggactttgca  
aagtgggagacgaggacgaatccacctcttagagctgggatccggtgagaacttacatgtaggctttacagacggata  
caactgatcatagagttagcaaaagaagctgaccagttgagctttgtgacagagttttcttgggtgccgcatagaaacgag  
gatt---gcagtgtcata---gtacagcctaccttgtaaaatgtcgtcggcccttatcaatctctct--  
ttttcccgtagttgttactagagttacaccgaacaagatttatacagctaattgttactagtagtataact

>Balsas\_INIFAP JSG 374\_AY105060

taccagctggaaaccagaagtgtataatcataaggattacctatctttcgtaagaggtgcagtgccacgcagccacgca  
gcaagcactccaaatgatttagaaaaggaggctgctaattcaaataaatccgctgacaacggaagtcccgtgaaggccaat  
cttgccagagttattgctttcttgtcatgacatcaatagccaagagagggcccatcatctagtgtcgtcaatcact  
ttcctgctgcaaatgatcgaccactggagactatagagtttggatctttgggaccttttgactgcctttatcctcattg  
aagtcaaatggaactactaacacagaagctacaagtaagggtgtttacagatgcctctccatttgtgttacagaggtccag  
ggccgcccgaactgaaaacaggttaattccaagtgtaaagttcatagcattgaattatacagtgtagactatgcattctt  
gcaagtagcataaaatataatataatagtagtataaaataaaaggatataaccagtgctggaggctgatgggtctgagga  
aagaataatcatcgaggttaa-accttctccccatggagagggc----  
tgcttcaaacctgcaaccgaagacctgtccttgtttaggcata----  
aaattcaatgtgatataagtatgattggtgtagtatatggggatttagggactgtcacagaagaccgatacgt-----  
-----

gtgtctagcatccagatttgctgttatgtgatagtgaattccatgcactttt-----  
acaatggctacaattctgtccttatatgaagcatcccgttagttgacttttctattgtttcagaccaccaggactttgca  
aagtgggagacgaggacgaatccacctcttagagctgggatccggtgagaacttacatgtaggctttacagacggata  
caactgatcatagagttagcaaaagaagctgaccagttgagctttgtgacagagttttcttgggtgccgcatagaaacgag  
gatt---gcagtgtcata---gtacagcctaccttgtaaaatgtcgtcggcccttatcaatctctct--  
ttttcccgtagttgttactagagttacaccgaacaagatttatacagctaattgttactagtagtataact

>Jalisco\_Benz 967\_AY105060

taccagctggaaaccagaagtgtataatcataaggattacctatctttcgtaagaggtgcagtgccacgcagccacgca  
gcaagcactccaaatggttttagaaaaggaggcggctaattcaaataaatccgctgacaacggaagtcccgtgaaggccaat  
cttgccagagttattgctttcttgtcatgacatcaatagccaagagaggtcccatcatctagtgtcgtcaatcact  
ttcctgctgcaaatgatcgaccactggagactatagagtttggatctttgggaccttttgactgcctttatcctcattg  
aagtcaaatggaactactaacacagaagctacaagtaagggtgtttacagatgcctctccatttgtgttacagaggtccag  
ggccgcccgaactgaaaacaggttaattccaagtgtaaagttcatagcattgaattatacagtgtagactatgcattctt  
gtaagtagcgtaaaatataatataatagtagaataaaataaaaggatataaccagtgctggaggctgatgggtctgagga  
aagaacaatcatcgaggttaataccttctccc-atggagagggc----  
tgcttcaaacctgcaaccgaagacctgcccttgtttaggcata----aaattcaat-----  
aagtatgattggtgtagtatatggggatttagggactgtcacagaagaccgatacgt-----  
-----

gtgtctggcatccagatttggtgttatgtgatagtga-  
ttccatgcacttttacgctacatacaatggctacaattctgtccttatatgaagcatcccgatagttgacttttctattg  
tttcagaccaccaggactttgcaaatgggagacgaggacgaatccacctcttagagctgggatccggtgagaactta  
cgtgtaggtctta----  
cggatacaactgatcatagagttagcaaaaggagctgaccagttgagctttgtgacagagttttttgggcccctcataga  
aatgaggattattgcagtggcata----  
gtacagcctaccgtgtaaaatgtcgtcggcccttatcaatctctctctttttcccgtagttgtcactagagttacaccg  
aacaaggtttatacagctaattgttactagtagtataact

>Balsas\_CIMMYT 8783\_AY105060

taccagctggaaaccagaagtgtataatcataaggattacctatctttcgtaagaggtgcagtgccacgcagccacgca  
gcaagcactccaaatggttttagaaaaggaggcggctaattcaaataaatccgctgacaacggaagtcccgtgaaggccaat  
cttgccagagttattgctttcttgtcatgacatcaatagccaagagaggtcccatcatctagtgtcgtcaatcact  
ttcctgctgcaaatgatcgaccactggagactatagagtttggatctttgggaccttttgactgcctttatcctcattg



aagtcaaactggaactactaacacagaagctacaagtaaggtgtttacagatgcctctccatttgtgttacagaggtccag  
ggccgcccgaactgaaaacaggttaattccaagtgtaaagttcatagcattgaattatacagtgtagactatgcattctt  
gtaagttagcgtaaaattaaatagtagaattaaataaaaggatatacccagtgctggaggctgatgggtctgagga  
aagaacaatcatcgaggttaataccttctccc-atggagagggc----  
tgcttcaaacctgcaaccgaagacctgcccttgttttaggcata----aaattcaat-----  
aagtatgattgggtgtagtatatggggattagggactgtcacagaagaccgatacgt-----  
-----

gtgtctggcatccagatttgttgttatgtgatagtga-  
ttccatgcacttttacgctacatacaaatggctacaattctgtccttatatgaagcatcccgatagttgacttttctattg  
tttcagaccaccaggactttgcaaagtgggagacgaggacgaatttccacctcttagagctgggatccggtgagaactta  
cgtgtaggtctta----  
cggatacaactgatcatagagttagcaaaaggagctgaccagttgagcttctgtgcagagttttttgggcccctcataga  
aatgaggattattgcagtggcata----  
gtacagcctaccgtgtaaaatgtcgtcggccccttatcaatctctctcttttcccgtagttgtcactagagttacaccg  
aacaaggtttatacagctaattgttactagtataactt

>Balsas\_USDA PI56686\_AY105060

tatcagctggaaaccagaagtgtaataatcataaggattacctatctttcgtaagaggtgcagtgccacgcagccacgca  
gcaagcactccaaatgggttagaaaaggaggcggctaattcaaataaatccgctgacaacggaagtcccgaaggccaat  
cttgccagagttattgcttcttctgtcatgacatcaatagccaagagaggtccccatcatctagtgtcatcaatcact  
tccctgctgcaaatgatcgaccactggagactatagagtttggatcttgggaccttttgcactgcctttatcctcattg  
aagtcaaactggaactactaacacagaagctacaagcaaggtgtttacagatgcctctccatttgtgttacagaggtccag  
gaccgcccgaactgaaaacaggttaattccaagtgtaaagttcatagcagtgattatacagtgtagactatgcattctt  
gcaagtagcataaaaattaaatagcagaattaaataaaaggatatacccagtgctggaggctgatgggtctgagga  
aagaataatcatcgaggtaa-accttctccc-atggagagggc----  
tgcttcaaactctgcaaccgaagacctgcccttgttttaggcata----aaattcaatgag--  
ataagtatgattgggtgtagtatatggggattagggactgtcacagaagaccgatacgt-----  
-----

gtgtctagcatccagatttgtgttatgtgatagtgaattccatgcactttt-----  
acaatggctacaattctgtccttatatgaagcatcccgttagttgacttttctattgtttcagaccaccaggactttgca  
aagtgggagacgaggacgaatttccacctcttagagctgggatccggtgagaacttacatgtaggctttacagacggata  
caactgatcatagagttagcaaaaggagctgaccagttgagcttctgtgcagagttttcttgggtgcccgatagaaacgag  
gatt---gcagtgctata----  
gtacagcctaccctgtgaaatgtcgtcggccccttatcaatctctctcttttcccgtagttgttactagagttacaccg  
aacaaggtttatacagctaattgttactagtataactt

>Balsas\_INIFAP JSG y LOS 109\_AY105060

tatcagctggaaaccagaagtgtaataatcataaggattacctatctttcgtaagaggtgcagtgccacgcagccacgca  
gcaagcactccaaatgggttagaaaaggaggcggcaaatcaaataaatctggtgacaacggaagtcccgaaggccaat  
cttgccagagttattgcttcttctgtcatgacatcaatagccaagagaggtccccatcatctagtgtcatcaatcact  
tccctgctgcaaatgatcgaccactggagactatagagtttggatcttgggaccttttgcactgcctttatcctcattg  
aagtcaaactggaactactaacacagaagctg-----  
ttacagatgcctctccatttgtgttacagaggtccagggcccgcgcaactgaaaacaggttaattccaagtgtaaagttc  
atagcattgaattatacagtgtagactatgcattcttgttaagttagcgtaaaattaaatagtagaattaaataaaa  
ggatatacccagtgctggaggctgatgggtctgaggaaagaataatcatcgaggtaa-accttctccc-atggagagggc-  
---tgcttcaaacctgcaaccgaagacctgcccttgttttaggcatacaaaaattcaatgag--  
ataagtatgattgggtgtagtatatggggattagggactgtcacagaagaccgatacgt-----  
-----

gtgtctagcatccagatttgtgttatgtgatagtgaattccatgcactttt-----  
acaatggctacaattctgtccttatatgaagcatcccgttagttgacttttctattgtttcagaccaccaggactttgca  
aagtgggagacgaggacgaatttccacctcttagagctgggatccggtgagaacttacatgtaggctttacagacggata  
caactgatcatagagttagcaaaaggagctgaccagttgagcttctgtgcagagttttcttgggcccgtgcatagaaatgag  
gatt---  
gcagtgctacatagtagcagcctaccgtgtaaaatgtcgtcggccccttatcaatctctctcttttcccgtagttgtt

aatagagttacaccgaacaagattttatacagctaattgttcactagtataactt

>Oaxaca\_INIFAP JSG 197\_AY105060

tatcagctggaaaccagaagtgtataatcataaggattacctatctttcgttaagaggtgcagtgccacgcagccacgca  
gcaagcactccaaatgggttttagaaaaggaggcggctaattcaaataaatccgctgacaacggaagtcccgttaaggccaat  
cttgccagagttattgctttcttgtcatgacatcaatagccaagagaggtccccatcatctagtgtcatcaatcatact  
tccctgctgcaaatgatcgaccactggagactatagagtttggatctttgggaccttttgcactgcctttatcctcattg  
aagtcaaatggaactactaacacagaagctacaagtaaggtgtttacagatgcctctccatttgtgttacagaggtccag  
ggccgcccgaactgaaaacaggtaattttccaagtgtaaagttcatagcattgaattatacagtgtagactatgcattctt  
gtaagtagcgtaaaattaaattaaatagtagaattaaataaaaggatataaccagtgctggaggctgatgggtctgagga  
aagaataatcatcgaggtaataccttctccc-atggagagggc----  
tgcttcaaacctgcaaccgaagacctgcccttgttttaggcata----aaattcaat-----  
aagtatgattgggtgtagtataatggggattagggactgtcacagaagaccgatacgt-----  
-----  
-----

gtgtctggcatccagatttgttgttatgtgatagtga-  
ttccatgcacttttacgctatatacaatggctacaattctgtccttatatgaagcatcccgatagttgacttttctattg  
tttcagaccaccaggactttgcaaagtgaggagacgaggacgaattttccacctcttagagctgggatccgggtgagaactta  
cgtgtaggtctta----  
cggatacaactgatcatagagttagcaaaaggagctgaccagttgagctttgtgacagagttttttggggcgcctcataga  
aatgaggattattgcagtgccata----  
gtacagcctaccgtgtaaaatgtcgtcggccccttatcaatctctctctttttcccgtagttgtcactagagttacaccg  
aacaaggtttatacagctaattgttcactagtataactt

>Balsas\_INIFAP JSG 378\_AY105060

tatcagctggaaaccagaagtgtataatcataaggattacctatctttcgttaagaggtgcagtgccacgcagccacgca  
gcaagcactccaaatgggttttagaaaaggaggcggctaattcaaataaatccgctgacaacggaagtcccgttaaggccaat  
cttgccagagttattgctttcttgtcatgacatcaatagccaagagaggtccccatcatctagtgtcatcaatcatact  
tccctgctgcaaatgatcgaccactggagactatagagtttggatctttgggaccttttgcactgcctttatcctcattg  
aagtcaaatggaactactaacacagaagctacaagtaaggtgtttacagatgcctctccatttgtgttacagaggtccag  
ggccgcccgaactgaaaacaggtaattttccaagtgtaaagttcatagcattgaattatacagtgtagactatgcattctt  
gtaagtagcgtaaaattaaattaaatagtagaattaaataaaaggatataaccagtgctggaggctgatgggtctgagga  
aagaataatcatcgaggtaataccttctccc-atggagagggc----  
tgcttcaaacctgcaaccgaagacctgcccttgttttaggcata----aaattcaat-----  
aagtatgattgggtgtagtataatggggattagggactgtcacagaagaccgatacgt-----  
-----  
-----

gtgtctggcatccagatttgttgttatgtgatagtga-  
ttccatgcacttttacgctacatacaatggctacaattctgtccttatatgaagcatcctgatagttgacttttctattg  
tttcagaccaccaggactttgcaaagtgaggagacgaggacgaattttccacctcttagagctgggatccgggtgagaactta  
cgtgtaggtctta----  
cggatacaactgatcatagagttagcaaaaggagctgaccagttgagctttgtgacagagttttttggggcgcctcataga  
aatgaggattattgcagtgccata----  
gtacagcctaccgtgtaaaatgtcgtcggccccttatcaatctctctctttttcccgtagttgtcactagagttacaccg  
aacaaggtttatacagctaattgttcactagtataactt

>Balsas\_Wilkes Site 6\_AY105060

tatcagctggaaaccagaagtgtataatcataaggattacctatctttcgttaagaggtgcagtgccacgcagccacgca  
gcaagcactccaaatgggttttagaaaaggaggcggctaattcaaataaatccgctgacaacggaagtcccgttaaggccaat  
cttgccagagttattgctttcttgtcatgacatcaatagccaagagaggtccccatcatctagtgtcatcaatcatact  
tccctgctgcaaatgatcgaccactggagactatggagtttggatctttgggaccttttgcactgcctttatcctcattg  
aagtcaaatggaactactaacacagaagctacaagtaaggtgtttacagatgcctctccatttgtgttacagaggtccag  
ggccgcccgaactgaaaacaggtaattttccaagtgtaaagttcatagcattgaattatacagtgtagactatgcattctt  
gtaagtagcgtaaaattaaattaaatagtagaattaaataaaaggatataaccagtgctggaggctgatgggtctgagga  
aagaataatcatcgaggtaataccttctccc-atggagagggc----  
tgcttcaaacctgcaaccgaagacctgcccttgttttaggcata----aaattcaat-----  
aagtatgattgggtgtagtataatggggattagggactgtcacagaagaccgatacgt-----  
-----  
-----

-----  
-----  
gtgtctggcatccagatttgttggtatgtgatagtga-  
ttccatgcacttttacgctacatacaaatggctacaattctgtccttatatgaagcatcccgatagttgacttttctattg  
tttcagaccaccaggactttgcaaagtgggagacgaggacgaatttccacctcttagagctgggatccgggtgagaactta  
cgtgtaggtctta----  
cggatacaactgatcatagagttagcaaaaggagctgaccagttgagctttgtgacagagttttttgggcacctcataga  
aatgaggattattgcagtggcata----  
gtacagcctaccgtgtaaaatgtcgtcggcccttatcaatctcttttcttttcccgtagttgtcactagagttacaccg  
aacaaggtttatacagctaattgttcactagtataactt

>Balsas\_INIFAP JSG y LOS 161\_AY105060

tatcagctggaaaccagaagtgtataatcataaggattacctatctttcgtaagaggtgcagtgccacgcagccacgca  
gcaagcactccaaatgggttagaaaaggaggcggctaattcaaataaatctgctgacaacggaagtcccgtaaggccaat  
cttgccagagttattgctttctgtcatgacatcaatagccaagagaggtcccatcatctagtgtcatcaatcact  
tccctgctgcaaatgatcgaccactggagactatagagtttgatctttgggaccttttgcactgcctttatcctcattg  
aagtcaaatggaactactaacacagaagctacaagtaaggtgtttacagatgcctctccatttgtgttacagaggtccag  
ggccgcccgaactgaaaacaggtaatttccaagtgtaaagttcatagcattgaattatacagtgtagactatgcattctt  
gtaagttagcgtaaaattaaattaaatagtagaattaaataaaaggatataaccagtgctggaggctgatgggtctgagga  
aagaataatcatcgaggttaatactttctccc-atggagagggc----  
tgcttcaaacctgcaaccgaagacctgcccttggttaggcata----aaattcaat-----  
aagtatgattggtgtagtatatggggattagggactgtcacagaagaccgatagct-----  
-----

-----  
gtgtctggcatccagatttgttggtatgtgatagtga-  
ttccatgcacttttacgctacatacaaatggctacaattctgtccttatatgaagcatcccgatagttgacttttctattg  
tttcagaccaccaggactttgcaaagtgggagacgaggacgaatttccacctcttagagctgggatccgggtgagaactta  
cgtgtaggtctta----  
cggatacaactgatcatagagttagcaaaaggagctgaccagttgagctttgtgacagagtttt-  
ttgggcgcctcatagaaatgaggattattgcagtggcata----  
gtacagcctaccgtgtaaaatgtcgtcggcccttatcaatctctctcttttcccgtagttgtcactagagttacaccg  
aacaaggtttatacagctaattgttcactagtataactt

>Tripsacum\_WW-2120\_AY105060

tatcagctggaaaccagaagtgtataatcataaggattacctgtcttttgtaagaggtacagtgccatgcagccacgca  
gcaagcactccaaatgggttagaaaaggagg---  
ctaattcaaataaaactcgctgacaacggaagtcccgtaaggccaattctgcccagagttattgctttctgtcatgacatc  
aatagccaagagagggcctccatcatctaatgctcctggatcacttccctgctgcaaatggctcgaccactggagactat  
agagtttgatctttgggacctttgcactgcctttatcctcattgaagtcaaatggaactactaacacacaaaactaaa  
gtaaggtgtttacagatgcctctccatttgtgttacagaggtccagggccgcccgaactgaaaacaggtaatttccaagt  
gtttagttcatagcattgaattatataagtgtagaataatgcattcttgcaagtagcataaaattaaattaaataatagaat  
taataaaaaggatataccctgtgctggaggctgatgggtctgaggaaaggataatcatcgaggtaa-accttctccc-  
gtggagagggc----tgcttcaaacacgcgacctta--cctgcccttttttaggcata----  
aaattcaatgtgagataaaatagattgttagtagtacatggggattggggactgtcacggaagaccgatagctaggggtgg  
taatggattgagattcaaacgcttccctcacaatttgtttgagctcttaattaaatttagttcaaaattgaatagaaatag  
agcccgatcccaatccgatccgatccttaattttatagtgtaaagtttagagccatctaactaccctaccgatagctg  
tgtctagcatccagatttgtggtatgtgattctgaattccatgcacttttacgct----  
acaatggctacaattctgtcattatgaagcatcccgatagttgacttttctattgtttcagaccaccaggactttgca  
aagtgggagacgaggacgaatttccacctctcagagctgggatccgggtgagaacttatataaggtcttacagacggata  
caactgatcatagagttagcaaaaggagctgaccagttgagctttgtgacagaattttctggggcgc---  
atagatatgaggatt---gcagtggcata----  
gtgtagcctaccgtgtaaaatctcgtcggtagccttatcaatctctctcttttcccgtagttgtttctagagttacaccg  
aacaaggtttatacagctaattgttcattagtataactt

>Tripsacum\_MIA 34597\_AY105060

tatcagctggaaaccagaagtgtataatcataaggattacctgtcttttgtaagaggtacagtgccatgcagccacgca  
gcaagcactccaaatgggttagaaaaggaggcctaattcaaataaaactcgctgacaacggaagtcccgtaaggccaat

tctgccagagttattgctttcttgtcatgacatcaatagccaagagaggcctccatcatctaagtctcctggatcact  
tccctgctgcaaatggctcgaccactggagactatagagtttggtatcttgggaccctttgactgctttatcctcattg  
aagtcaaatggaactactaacacacaaaactacaagtaagggtgttacagatgcctctccatttgtgttacagaggtccag  
ggccgcccgaactgaaaacaggtaatcccaagtgttagttcatagcattgaattatatagtgtaacaatatgcattctt  
gcaagtagcataaaatataatataatagaatataaataaaaggatataccctgtgctggaggctgatgggtctgagga  
aaggataatcatcgaggtaa-accttctccc-gtggagagggc----tgcttcaaacacgcgacctta--  
cctgcccttttttaggcata----  
aaattcaatgtgagataaaatagattgtagtagtacatggggattggggactgtcacggaagaccgatacgtaggggtgg  
taatggattgcgattcaaacgttcccttcacaatttgtttgagcccttaattaatttttagttcaaaattgaatagaaatag  
agcccggctcctaactctgattcgatccttaattttatagtgtaaagttaatagccatataactaccctaccgatacgtg  
tgtctagcatccagatttgtctgttatgtgattctgaattccatgcacttttacgct----  
acaatggctacaattctgtcattatatgaagcatcccgatagttgacttttctattgtttcagaccaccaggactttgca  
aagtgggagacgaggacgaatttccacctctcagagctgggatccgggtgagaacttatatataggtcttacagacggata  
caactgatcatagagttagcaaaaggagctgaccagttgagctttgtgcagaattttcttgggagc--  
atagatatgaggatt---gcagtggcata----  
gtgtagcctaccgtgtaaaatctcgtcggtagccttatcaatctctcccttttccccgtagttgtttctagagttacaccg  
aacaaggtttatacagctaattgttcattagtataactt

>B73\_AY108178

gatgccaggagctggtaatcctgctggggctggcccaccacctcgccctcgaccatggtgtcgtgagccttccctgggtggga  
gagttctgatatttgggtgggttctgtggcgggtc----tt--  
cactctgcttcaaaactttacctcctggatccaacggaagataagccaacctggaggcttctgaatgttccagggcatcc  
tccacgggttcgctggggccacagtagtctgtgtgtcggagggacaaaggcaatagttcttggaggacaaactggagaag  
agtggacgctaactgaaatacacgagctttctctagcaagctcattagctctgaagatgggaagggtcccagcaagctttcc  
agcttccctgaagcaatgtctctggagac-agctacctgttcatatgacttgaggcagat---ttttttt-  
ccaacagtggtgtgcaagcacaagcaca-----aaggggtgggtgaag-----  
tggacaaccagacctgattacttgtgacctgctgggagtcagctgggtctaaaagttaggaataagttacctctgctgctg  
ctgttcgtatgatctg---aa-atgatggaatagctggcatccata----  
agctaactctcagttcttatcatgtttcaaatgggacactggcattatgtcgtgagcccc-  
tgatgcaacaggtaccctgcttctggttg-  
cgctgcttccggtgacaactgatgctgtggtcttctgttttttgacctcaactgc-----tgtga-  
-----agctt-----  
-----  
ctttgttatgcttttgccacttctgcttactcaattgctgctttctggagaagctgtaaacacagacacacctgctgt  
atthaattttgcctttcgtatca---  
ctttgtgcttacctcagctgttagtgatacctataacattttcttttttaattctgattatcaaaggatgaattatgaatat  
caacagttccatcttaccgagacatttatc-----  
-----  
----ttacctgggatcaggggtt--tggtgct---ggcaaaccaacaa-----caggcgacggccatgta-----  
----tgtgtcg----tgtcta-----gagt----ttctg--ttatt-----  
-----  
tgatttttatcgtcttactatgattcaatgtgtaaatattgttatcgtg-----acctgccg-  
aactgctgggtgggtgcttatatt-atcgacaactataaccggttccaaacagagttttt-----  
ctttccattttgtcatctctga-----cgc-----atcagagaaagaaaaagggacactaatggcgta-  
caaggtacaa----agacaagcacagat-----accaggcatct-----  
-----gaaccggaa

>Mo17\_AY108178

gatgccaggagctggtaatcctgctggggctggcccaccacctcgccctcgaccatggtgtcgtgagccttccctgggtggga  
gagttctgatatttgggtgggttctgtggcgggtc----tt--  
cactctgcttcaaaactttacctcctggatccaacggaagataagccaacctggaggcttctgaatgttccagggcatcc  
tccacgggttcgctggggccacagtagtctgtgtgtcggagggacaaaggcaatagttcttggaggacaaactggagaag  
agtggacgctaactgaaatacacgagctttctctagcaagctcattagctctgaagatgggaagggtcccagcaagctttcc

agcttccttgaagcaatgtctctggagac-agctacctgttcatatgacttgaggcagat---ttttttt-  
ccaacagtggtgtgcaagcacaagcaca---aagggttggggaag-----  
tggacaaccagacctgattacttgtgccatgcctgggagtcagctgggtctaaaagtaggaataagttacctctgctgctg  
ctgttcgtatgatctg---aa-atgatggaatagctggcatccata----  
agctaactctcagttcttatcatgtttcaaaggggacactggcattatgtcgctggagcccc-  
tgatgcaacaggtaccctgccttctgggtg-  
cgctgccttcggtgacaactgatgctgtgggtcttctgttttttgacctcaactgc-----tgtga-  
-----agctt-----  
-----  
ctttgttatgcttttgcgccacttctgtgcttactcaattgctgctttctggagaagctgtaacacagacacacctgctgt  
atthaattttgcctttcgtatca---  
ctttgtgcttacctcagctggttagtgatacctataacattttcttttaactctgattatcaaaggatgaattatgaatat  
caacagttccatcttaccgcgacatttacc-----  
-----  
----ttacctgggatcaggggtt--tgggtgct--ggcaaaccaaaa-----caggcgacggccatgta-----  
----tgtgtcg-----tgtcta-----gagt----ttctg--ttatt-----  
-----  
tgatttttatcgtcttactatgattcaatgtgtaaatattgttatcgtg-----acctgccg-  
aactgcctgggttggctgcttatatt-atcgacaactataaccggttccaaacagagtttttt-----  
ctttccattttgtcatctctga-----cgc-----atcagagaaagaaaaagggacactaatggcgta-  
caaggtacaa----agacaagcacagat-----accaggcatt-----  
-----gaaccggaa

>Ky21\_AY108178

gatgccaggagctggtaactcctgctgggggtcggcccaccacctcgacctgattgtcgtgagccttctggtggga  
gagttctgatatttgggtggttctgtggcggggc---tt--  
cactctgcttcaaaactttacctcctggatccaacggaagataagccaacctggaggcttctgaatgttccagggcatcc  
tccacgggttcgctggggccacagtagtctgtgtgtcggaggggacaaaggcaatagttcttggaggacaaactggagaag  
agtggacgctaactgaaatacacagagctttctctagcaagctcattagctgaagatgggaaggtcccagcaagctttcc  
agcttcttgaagcaatgtctctggagac-agctacctgttcatatgacttgaggcagat---ttttttt-  
ccaacagtggtgtgcaagcacaagcaca---aagggttggggaag-----  
tggacaaccagacctgattacttgtgccatgcctgggagtcagctgggtctaaaagtaggaataagttacctctgctgctg  
ctgttcgtatgatctg---aa-atgatggaatagctggcatccata----  
agctaactctcagttcttatcatgtttcaaaggggacactggcattatgtcgctggagcccc-  
tgatgcaacaggtaccctgccttctgggtg-  
cgctgccttcggtgacaactgatgctgtgggtcttctgttttttgacctcaactgc-----tgtga-  
-----agctt-----  
-----  
ctttgttatgcttttgcgccacttctgtgcttactcaattgctgctttctggagaagctgtaacacagacacacctgctgt  
atthaattttgcctttcgtatca---  
ctttgtgcttacctcagctggttagtgatacctataacattttcttttaactctgattatcaaaggatgaattatgaatat  
caacagttccatcttaccgcgacatttacc-----  
-----  
----ttacctgggatcaggggtt--tgggtgct--ggcaaaccaaaa-----caggcgacggccatgta-----  
----tgtgtcg-----tgtcta-----gagt----ttctg--ttatt-----  
-----  
tgatttttatcgtcttactatgattcaatgtgtaaatattgttatcgtg-----acctgccg-  
aactgcctgggttggctgcttatatt-atcgacaactataaccggttccaaacagagtttttt-----  
ctttccattttgtcatctctga-----cgc-----atcagagaaagaaaaagggacactaatggcgta-  
caaggtacaa----agacaagcacagat-----accaggcatt-----  
-----gaaccggaa

>IL14H\_AY108178

gatgccaggagctggtaactcctgctgggggtcggcccaccacctcgacctgattgtcgtgagccttctggtggga  
gagttctgatatttgggtggttctgtggcggggc---tt--  
cactctgcttcaaaactttacctcctggatccaacggaagataagccaacctggaggcttctgaatgttccagggcatcc  
tccacgggttcgctggggccacagtagtctgtgtgtcggaggggacaaaggcaatagttcttggaggacaaactggagaag

agtggacgctaactgaaatacacgagctttctctagcaagctcattagctctgaagatgggaaggtcccagcaagctttcc  
agcttccttgaagcaatgtctctggagac-agctacctgttcatatgacttgaggcagat---ttttttt-  
ccaacagtggtgtgcaagcacaagcaca---aagggttggggaag-----  
tggacaaccagacctgattacttgtgccatgcctgggagtcagctggctctaaaagtaggaataagttacctctgctgctg  
ctgttcgtatgatctg---aa-atgatggaatagctggcatccata----  
agctaactctcagttcttatcatgtttcaaaggggacactggcattatgtcgctggagcccc-  
tgatgcaacaggtaccctgccttctgggtg-  
cgctgccttcggtgacaactgatgctgtgggtcttctgttttttgacctcaactgc-----tgtga-  
-----agctt-----  
-----  
ctttgttatgcttttgcgccacttctgcttactcaattgctgctttctggagaagctgtaacacagacacacctgctgt  
atthaattttgccttctgatatca---  
ctttgtgcttacctcagctgttagtgatacctataacattttcttttaactctgattatcaaaggatgaattatgaatat  
caacagttccatcttaccgcgacatttacc-----  
-----  
----ttacctgggatcaggggtt--tggtgct---ggcaaaccaacaa-----cagggcagggccatgta-----  
----tgtgtcg-----tgtcta-----gagt---ttctg--ttatt-----  
-----  
tgatttttatcgtcttactatgattcaatgtgtaaatattgttatcgtg-----acctgccg-  
aactgcctgggttggctgcttatatt-atcgacaactataaccggttccaaacagagtttttt-----  
ctttccattttgtcatctctga-----cgc-----atcagagaaagaaaaagggacactaatggcgta-  
caaggtacaa---agacaagcacagat-----accaggcatct-----  
-----gaaccggaa

>HP301\_AY108178

gatgccaggagctggtaatcctgctgggggtcggccaccacctcgctcgacctggttgtcgtgagccttctggtggga  
gagttctgatatttgggtgggttctgtggcggggtc---tt--  
cactctgcttcaaaactttacctcctggatccaacggaagataagccaacctggaggcttctgaatgttccagggcatcc  
tccacgggttcgctggggccacagtaacttgtgtgtcggagggacaaaggcaatagttcttggaggacaaactggagaag  
agtggacgctaactgaaatacacgagctttctctagcaagctcattagctctgaagatgggaaggtcccagcaagctttcc  
agcttccttgaagcaatgtctctggagac-agctacctgttcatatgacttgaggcagat---ttttttt-  
ccaacagtggtgtgcaagcacaagcaca---aagggttggggaag-----  
tggacaaccagacctgattacttgtgccatgcctgggagtcagctggctctaaaagtaggaataagttacctctgctgctg  
ctgttcgtatgatctg---aa-atgatggaatagctggcatccata----  
agctaactctcagttcttatcatgtttcaaaggggacactggcattatgtcgctggagcccc-  
tgatgcaacaggtaccctgccttctgggtg-  
cgctgccttcggtgacaactgatgctgtgggtcttctgttttttgacctcaactgc-----tgtga-  
-----agctt-----  
-----  
ctttgttatgcttttgcgccacttctgcttactcaattgctgctttctggagaagctgtaacacagacacacctgctgt  
atthaattttgccttctgatatca---  
ctttgtgcttacctcagctgttagtgatacctataacattttcttttaactctgattatcaaaggatgaattatgaatat  
caacagttccatcttaccgcgacatttacc-----  
-----  
----ttacctgggatcaggggtt--tggtgct---ggcaaaccaacaa-----cagggcagggccatgta-----  
----tgtgtcg-----tgtcta-----gagt---ttctg--ttatt-----  
-----  
tgatttttatcgtcttactatgattcaatgtgtaaatattgttatcgtg-----acctgccg-  
aactgcctgggttggctgcttatatt-atcgacaactataaccggttccaaacagagtttttt-----  
ctttccattttgtcatctctga-----cgc-----atcagagaaagaaaaagggacactaatggcgta-  
caaggtacaa---agacaagcacagat-----accaggcatct-----  
-----gaaccggaa

>M37W\_AY108178

gatgccaggagctggtaatcctgctgggggtcggccaccacctcgctcgacctggttgtcgtgagccttctggtggga  
gagttctgatatttgggtgggttctgtggcggggtc---tt--  
cactctgcttcaaaactttacctcctggatccaacggaagataagccaacctggaggcttctgaatgttccagggcatcc

tccacgggttcgcctggggccacagtagtctgtgtgtcggagggacaaaggcaatagttcttggaggacaaactggagaag  
agtggacgctaactgaaatacacgagctttctctagcaagctcatttagtctgaagatgggaagggtcccagcaagctttcc  
agcttccttgaagcaatgtctctggagac-agctacctgttcatatgacttgaggcagat---ttttttt-  
ccaacagtgggtgtgcaagcacaagcaca---aagggttgggtgaag-----  
tggacaaccagacctgattacttgtgccatgcctgggagtcagctgggtctaaaagtaggaataagttacctctgctgctg  
ctgttcgatgatctg---aa-atgatggaatagctggcatccata----  
agctaactctcagttcttatcatgtttcaaattgggacactggcattatgtcgctggagcccc-  
tgatgcaacaggtaccctgccttctgggtg-  
cgctgccttcgggtgacaactgatgctgtgggtcttctgttttttgacctcaactgc-----tgtga-  
-----agctt-----  
-----  
ctttgttatgcttttgcgccacttctgtgcttactcaattgctgctttctggagaagctgtaacacagacacacctgctgt  
atthaattttgcctttcgtatca---  
ctttgtgcttacctcagctgttagtgataacctataacattttctttttaatctgattatcaaaggatgaattatgaatat  
caacagttccatcttaccgcgacatttacc-----  
-----  
----ttacctgggatcaggggtt--tggtgct---ggcaaaccaaca-----caggcgacggccatgta-----  
----tgtgctg-----tgtcta-----gagt---ttctg--ttatt-----  
-----  
tgatttttatcgtcttactatgattcaatgtgtaaatattgttatcgtg-----acctgccg-  
aactgcctgggttggctgcttatatt-atcgacaactataaccggttccaaacagagttttt-----  
ctttccattttgtcatctctga-----cgc-----atcagagaaagaaaaagggacactaatggcgta-  
caaggtacaa---agacaagcacagat-----accaggcatct-----  
-----gaaccggaa

>Oh43\_AY108178

gatgccaggagctggtaactctgctgggggtcggccaccacctcgctcgacctggttgtcgtgagccttctgggtggga  
gagttctgatatttgggtggttctgtggcgggtc----tt--  
cactctgcttcaaaactttacctcctggatccaacggaagataagccaacctggaggcttctgaatgttccagggcatcc  
tccacgggttcgcctggggccacagtagtctgtgtgtcggagggacaaaggcaatagttcttggaggacaaactggagaag  
agtggacgctaactgaaatacacgagctttctctagcaagctcatttagtctgaagatgggaagggtcccagcaagctttcc  
agcttccttgaagcaatgtctctggagac-agctacctgttcatatgacttgaggcagat---ttttttt-  
ccaacagtgggtgtgcaagcacaagcaca---aagggttgggtgaag-----  
tggacaaccagacctgattacttgtgccatgcctgggagtcagctgggtctaaaagtaggaataagttacctctgctgctg  
ctgttcgatgatctg---aa-atgatggaatagctggcatccata----  
agctaactctcagttcttatcatgtttcaaattgggacactggcattatgtcgctggagcccc-  
tgatgcaacaggtaccctgccttctgggtg-  
cgctgccttcgggtgacaactgatgctgtgggtcttctgttttttgacctcaactgc-----tgtga-  
-----agctt-----  
-----  
ctttgttatgcttttgcgccacttctgtgcttactcaattgctgctttctggagaagctgtaacacagacacacctgctgt  
atthaattttgcctttcgtatca---  
ctttgtgcttacctcagctgttagtgataacctataacattttctttttaatctgattatcaaaggatgaattatgaatat  
caacagttccatcttaccgcgacatttacc-----  
-----  
----ttacctgggatcaggggtt--tggtgct---ggcaaaccaaca-----caggcgacggccatgta-----  
----tgtgctg-----tgtcta-----gagt---ttctg--ttatt-----  
-----  
tgatttttatcgtcttactatgattcaatgtgtaaatattgttatcgtg-----acctgccg-  
aactgcctgggttggctgcttatatt-atcgacaactataaccggttccaaacagagttttt-----  
ctttccattttgtcatctctga-----cgc-----atcagagaaagaaaaagggacactaatggcgta-  
caaggtacaa---agacaagcacagat-----accaggcatct-----  
-----gaaccggaa

>CML69\_AY108178

gatgccaggagctggtaactctgctgggggtcggccaccacctcgctcgacctggttgtcgtgagccttctgggtggga  
gagttctgatatttgggtggttctgtggcgggtc----tt--

cactctgcttcaaaactttacctcctggatccaacggaagataagccaacctggaggcttctgaatgttccagggcatcc  
tccacgggttcgcctggggccacagtagtctgtgtgtcggagggacaaaggcaatagttcttggaggacaaactggagaag  
agtggacgctaactgaaatacacgagctttctctagcaagctcattagctgaagatgggaagggtccagcaagctttcc  
agcttccttgaagcaatgtctctggagac-agctacctgttcatatgacttgaggcagat---ttttttt-  
ccaacagtgggtgtgcaagcacaagcaca---aagggttgggtgaag-----  
tggacaaccagacctgattacttgtgcatgcctgggagtcagctgggtctaaaagtaggaataagttacctctgctgctg  
ctgttcgtatgatctg---aa-atgatggaatagctggcatccata----  
agctaactctcagttcttatcatgtttcaaagggacactggcattatgtcgctggagcccc-  
tgatgcaacaggtaccctgccttctgggtg-  
cgctgccttcgggtgacaactgatgctgtgggtcttctgttttttgacctcaactgc-----tgtga-  
-----agctt-----  
-----  
ctttgttatgcttttgcgccacttcgtgcttactcaattgctgctttctggagaagctgtaacacagacacacctgctgt  
atthaattttgcctttcgtatca---  
ctttgtgcttacctcagctgttagtgatacctataacattttctttttaatctgattatcaaaggatgaattatgaatat  
caacagttccatcttaccgcgacatttacc-----  
-----  
----ttacctgggatcaggggtt--tggtgct---ggcaaaccaaca---caggcgacggccatgta-----  
----tgtgtcg-----tgtcta-----gagt----ttctg--ttatt-----  
-----  
tgatttttatcgtcttactatgattcaatgtgtaaatattgttatcgtg-----acctgccg-  
aactgcctgggttggtgcttatatt-atcgacaactataaccggttccaaacagagttttt-----  
ctttccattttgtcatctctga-----cgc-----atcagagaaagaaaaaggacactaatggcgta-  
caaggtacaa---agacaagcacagat-----accaggcatct-----  
-----gaaccggaa

>CML247\_AY108178

gatgccaggagctggtaactcctgctgggggtcggccaccacctcgctcgacctggttctgctgagccttctggtggga  
gagttctgatatttgggtggttctgtggcgggtc----tt--  
cactctgcttcaaaactttacctcctggatccaacggaagataagccaacctggaggcttctgaatgttccagggcatcc  
tccacgggttcgcctggggccacagtagtctgtgtgtcggagggacaaaggcaatagttcttggaggacaaactggagaag  
agtggacgctaactgaaatacacgagctttctctagcaagctcattagctgaagatgggaagggtccagcaagctttcc  
agcttccttgaagcaatgtctctggagac-agctacctgttcatatgacttgaggcagat---ttttttt-  
ccaacagtgggtgtgcaagcacaagcaca---aagggttgggtgaag-----  
tggacaaccagacctgattacttgtgcatgcctgggagtcagctgggtctaaaagtaggaataagttacctctgctgctg  
ctgttcgtatgatctg---aa-atgatggaatagctggcatccata----  
agctaactctcagttcttatcatgtttcaaagggacactggcattatgtcgctggagcccc-  
tgatgcaacaggtaccctgccttctgggtg-  
cgctgccttcgggtgacaactgatgctgtgggtcttctgttttttgacctcaactgc-----tgtga-  
-----agctt-----  
-----  
ctttgttatgcttttgcgccacttcgtgcttactcaattgctgctttctggagaagctgtaacacagacacacctgctgt  
atthaattttgcctttcgtatca---  
ctttgtgcttacctcagctgttagtgatacctataacattttctttttaatctgattatcaaaggatgaattatgaatat  
caacagttccatcttaccgcgacatttacc-----  
-----  
----ttacctgggatcaggggtt--tggtgct---ggcaaaccaaca---caggcgacggccatgta-----  
----tgtgtcg-----tgtcta-----gagt----ttctg--ttatt-----  
-----  
tgatttttatcgtcttactatgattcaatgtgtaaatattgttatcgtg-----acctgccg-  
aactgcctgggttggtgcttatatt-atcgacaactataaccggttccaaacagagttttt-----  
ctttccattttgtcatctctga-----cgc-----atcagagaaagaaaaaggacactaatggcgta-  
caaggtacaa---agacaagcacagat-----accaggcatct-----  
-----gaaccggaa

>KUI3\_AY108178

gatgccaggagctggtaactcctgctgggggtcggccaccacctcgctcgacctggttctgctgagccttctggtggga



gagttctgatatttgggtgggttctgtggcggggtc----tt--  
cactctgcttcaaaactttacctcctggatccaacggaagataagccaacctggaggcttctgaatgttccagggcatcc  
tccacgggttcgcctggggccacagtaacttgtgttgcggagggacaaaggcaatagttcttggaggacaaactggagaag  
agtggacgctaactgaaatacacgagctttctctagcaagctcattagctgaagatgggaagggtccagcaagctttcc  
agcttccttgaagcaatgtctctggagac-agctacctgttcatatgacttgaggcagat---ttttttt-  
ccaacagtggtgtgcaagcacaagcaca---aagggttgggtgaag-----  
tggacaaccagacctgattacttgtgccatgcctgggagtcagctgggtctaaaagtaggaataagttacctctgctgctg  
ctgttcgatgatctg---aa-atgatggaatagctggcatccata----  
agctaactctcagttcttatcatgtttcaaaggggacactggcattatgtcgctggagcccc-  
tgatgcaacaggtaccctgccttctgggtg-  
cgctgccttcgggtgacaactgatgctgtgggtcttctgttttttgacctcaactgc-----tgtga-  
-----agctt-----  
-----  
ctttgttatgcttttgcgccacttctgcttactcaattgctgctttctggagaagctgtaaacacagacacacctgctgt  
atthaattttgcctttcgtatca---  
ctttgtgcttacctcagctgttagtgatacctataacattttctttttaatctgattatcaaaggatgaattatgaatat  
caacagttccatcttaccgcgacatttctc-----  
-----  
----ttacctgggatcaggggtt--tggtgct---ggcaaaccaaaa-----caggcgacggccatgta-----  
----tgtgtcg-----tgtcta-----gagt----ttctg--ttatt-----  
-----  
tgatttttatcgtcttactatgattcaatgtgtaaatattgttatcgtg-----acctgccg-  
aactgcctgggttggctgcttatatt-atcgacaactataaccggttccaaacagagttttt-----  
ctttccattttgtcatctctga-----cgc-----atcagagaaagaaaaagggacactaatggcgta-  
caaggtacaa---agacaagcacagat-----accaggcatct-----  
-----gaaccggaa

>NC350\_AY108178

gatgccaggagctggtaaatcctgctgggggtcggccaccacctcgcctcgaccatgttgtcgtgagccttctgggtggga  
gagttctgatatttgggtgggttctgtggcggggtc----tt--  
cactctgcttcaaaactttacctcctggatccaacggaagataagccaacctggaggcttctgaatgttccagggcatcc  
tccacgggttcgcctggggccacagtaacttgtgttgcggagggacaaaggcaatagttcttggaggacaaactggagaag  
agtggacgctaactgaaatacacgagctttctctagcaagctcattagctgaagatgggaagggtccagcaagctttcc  
agcttccttgaagcaatgtctctggagac-agctacctgttcatatgacttgaggcagat---ttttttt-  
ccaacagtggtgtgcaagcacaagcaca---aagggttgggtgaag-----  
tggacaaccagacctgattacttgtgccatgcctgggagtcagctgggtctaaaagtaggaataagttacctctgctgctg  
ctgttcgatgatctg---aa-atgatggaatagctggcatccata----  
agctaactctcagttcttatcatgtttcaaaggggacactggcattatgtcgctggagcccc-  
tgatgcaacaggtaccctgccttctgggtg-  
cgctgccttcgggtgacaactgatgctgtgggtcttctgttttttgacctcaactgc-----tgtga-  
-----agctt-----  
-----  
ctttgttatgcttttgcgccacttctgcttactcaattgctgctttctggagaagctgtaaacacagacacacctgctgt  
atthaattttgcctttcgtatca---  
ctttgtgcttacctcagctgttagtgatacctataacattttctttttaatctgattatcaaaggatgaattatgaatat  
caacagttccatcttaccgcgacatttctc-----  
-----  
----ttacctgggatcaggggtt--tggtgct---ggcaaaccaaaa-----caggcgacggccatgta-----  
----tgtgtcg-----tgtcta-----gagt----ttctg--ttatt-----  
-----  
tgatttttatcgtcttactatgattcaatgtgtaaatattgttatcgtg-----acctgccg-  
aactgcctgggttggctgcttatatt-atcgacaactataaccggttccaaacagagttttt-----  
ctttccattttgtcatctctga-----cgc-----atcagagaaagaaaaagggacactaatggcgta-  
caaggtacaa---agacaagcacagat-----accaggcatct-----  
-----gaaccggaa

>CML322\_AY108178

gatgccaggagctggtaatcctgctgggggtcggcccaccacctcgccctcgaccatggttgtcgtgagccttcctgggtggga  
gagttctgatatttgggtgggttctgtggcgggtc----tt--  
cactctgcttcaaaactttacctcctggatccaacggaagataagccaacctggaggcttctgaatggtccagggcatcc  
tccacgggttcgcctggggccacagtagcttctgtgtgtcggagggacaaaggcaatagttcttggaggacaaactggagaag  
agtggacgctaactgaaatacacgagcttctctagcaagctcattagctctgaagatgggaagggtcccagcaagctttcc  
agcttccttgaagcaatgtctctggagac-agctacctgttcatatgacttgaggcagat---ttttttt-  
ccaacagtgggtgtgcaagcacaagcaca-----aagggttgggtgaag-----  
tggacaaccagacctgattacttgtgcatgctgggagtcagctgggtctaaaagtaggaataagttacctctgctgctg  
ctgttcgtatgatctg---aa-atgatggaatagctggcatccata----  
agctaactctcagttcttatcatgtttcaaatgggacactggcattatgtcgtgagcccc-  
tgatgcaacaggtaccctgccttctgggtg-  
cgcctgccttcgggtgacaactgatgctgtgggtcttctgttttttgacctcaactgc-----tgtga-  
-----agctt-----  
-----  
ctttgttatgcttttgcgccacttcgtgcttactcaattgctgctttctggagaagctgtaacacagacacacctgctgt  
atttaattttgcctttcgtatca---  
ctttgtgcttacctcagctggttagtgatacctataacattttctttttaatctgattatcaaaggatgaattatgaatat  
caacagttccatcttaccgcgacatttacc-----  
-----  
----ttacctgggatcagggtt--tggtgct---ggcaaaccaacaa-----caggcgacggccatgta-----  
----tgtgtcg-----tgtcta-----gagt----ttctg--ttatt-----  
-----  
tgatttttatcgtcttactatgattcaatgtgtaaatattgttatcgtg-----acctgccg-  
aactgcctgggttggtgcttattat--atcgacaactataaccgttccaaacagagttttt-----  
ctttccattttgtcatctctga----cgc-----atcagagaaagaaaaagggacactaatggcgta-  
caaggtacaa---agacaagcacagat-----accaggcatct-----  
-----gaaccggaa

>CML333\_AY108178

gatgccaggagctggtaatcctgctgggggtcggcccaccacctcgccctcgaccatggttgtcgtgagccttcctgggtggga  
gagttctgatatttgggtgggttctgtggcgggtc----tt--  
cactctgcttcaaaactttacctcctggatccaacggaagataagccaacctggaggcttctgaatggtccagggcatcc  
tccacgggttcgcctggggccacagtagcttctgtgtgtcggagggacaaaggcaatagttcttggaggacaaactggagaag  
agtggacgctaactgaaatacacgagcttctctagcaagctcattagctctgaagatgggaagggtcccagcaagctttcc  
agcttccttgaagcaatgtctctggagac-agctacctgttcatatgacttgaggcagat---ttttttt-  
ccaacagtgggtgtgcaagcacaagcaca-----aagggttgggtgaag-----  
tggacaaccagacctgattacttgtgcatgctgggagtcagctgggtctaaaagtaggaataagttacctctgctgctg  
ctgttcgtatgatctg---aa-atgatggaatagctggcatccata----  
agctaactctcagttcttatcatgtttcaaatgggacactggcattatgtcgtgagcccc-  
tgatgcaacaggtaccctgccttctgggtg-  
cgcctgccttcgggtgacaactgatgctgtgggtcttctgttttttgacctcaactgc-----tgtga-  
-----agctt-----  
-----  
ctttgttatgcttttgcgccacttcgtgcttactcaattgctgctttctggagaagctgtaacacagacacacctgctgt  
atttaattttgcctttcgtatca---  
ctttgtgcttacctcagctggttagtgatacctataacattttctttttaatctgattatcaaaggatgaattatgaatat  
caacagttccatcttaccgcgacatttacc-----  
-----  
----ttacctgggatcagggtt--tggtgct---ggcaaaccaacaa-----caggcgacggccatgta-----  
----tgtgtcg-----tgtcta-----gagt----ttctg--ttatt-----  
-----  
tgatttttatcgtcttactatgattcaatgtgtaaatattgttatcgtg-----acctgccg-  
aactgcctgggttggtgcttattat--atcgacaactataaccgttccaaacagagttttt-----  
ctttccattttgtcatctctga----cgc-----atcagagaaagaaaaagggacactaatggcgta-  
caaggtacaa---agacaagcacagat-----accaggcatct-----  
-----gaaccggaa

>KUI11\_AY108178

```
gatgccaggagctggtaatcctgctgggggtcggccaccacctcgccctcgaccatggttgtcgtgagccttcctgggtggga
gagttctgatatttgggtgggttctgtggcggggc----tt--
cactctgcttcaaaactttacctcctggatccaacggaagataagccaacctggaggcttctgaatgttccagggcatcc
tccacgggttcgcctggggccacagtaacttgtggttgcggagggacaaaaggcaatagttcttggaggacaaaactggagaag
agtggacgctaactgaaatacacgagctttctctagcaagctcattagctctgaagatgggaagggtcccagcaagctttcc
agcttccttgaagcaatgtctctggagac-agctacctgttcatatgacttgaggcagat---ttttttt-
ccaacagtgggtgtgcaagcacaagcaca-----aagggttgggtgaag-----
tggacaaccagacctgattacttgtgccatgcctgggagtcagctgggtctaaaagtaggaataagttacctctgctgctg
ctgttcgatgatctg---aa-atgatggaatagctggcatccata----
agctaactctcagttcttatcatgtttcaaatgggacactggcattatgtcgtgagcccc-
tgatgcaacaggtaccctgccttctgggtg-
cgcctgccttcgggtgacaactgatgctgtgggtcttctgttttttgacctcaactgc-----tgtga-
-----agctt-----
-----
ctttgttatgcttttgcgccacttcgtgcttactcaattgctgctttctggagaagctgtaaacacagacacacctgctgt
atthaattttgcctttcgtatca---
ctttgtgcttacctcagctggttagtgatacctataacattttctttttaatctgattatcaaaggatgaattatgaatat
caacagttccatcttaccgcgacatttatc-----
-----
----ttacctgggatcagggtt--tggtgct---ggcaaaccaaca-----caggcgacggccatgta-----
----tgtgtcg-----tgtcta-----gagt----ttctg--ttatt-----
-----
tgatttttatcgtcttactatgattcaatgtgtaaatattgttatcgtg-----acctgccg-
aactgcctgggttggctgcttatatt-atcgacaactataaccgttccaaacagagttttt-----
ctttccattttgtcatctctga-----cgc-----atcagagaaaagaaaagggacactaatggcgta-
caaggtacaa---agacaagcacagat-----accaggcatct-----
-----gaaccggaa
```

> Balsas\_INIFAP JSG 378\_AY108178

```
gatgccaggagctggtaatcctgctgggggtcggccaccacctcgccctcgaccatggttgtcgtgagccttcctgggtggga
gagttctgatatttgggtgggttctgtggcggggc----tt--
cactctgcttcaaaactttacctcctggatccaacggaagataagccaacctggaggcttctgaatgttccagggcatcc
tccacgggttcgcctggggccacagtaacttgtggttgcggagggacaaaaggcaatagttcttggaggacaaaactggagaag
agtggacgctaactgaaatacacgagctttctctagcaagctcattagctctgaagatgggaagggtcccagcaagctttcc
agcttccttgaagcaatgtctctggagac-agctacctgttcatatgacttgaggcagat---ttttttt-
ccaacagtgggtgtgcaagcacaagcaca-----aagggttgggtgaag-----
tggacaaccagacctgattacttgtgccatgcctgggagtcagctgggtctaaaagtaggaataagttacctctgctgctg
ctgttcgatgatctg---aa-atgatggaatagctggcatccata----
agctaactctcagttcttatcatgtttcaaatgggacactggcattatgtcgtgagcccc-
tgatgcaacaggtaccctgccttctgggtg-
cgcctgccttcgggtgacaactgatgctgtgggtcttctgttttttgacctcaactgc-----tgtga-
-----agctt-----
-----
ctttgttatgcttttgcgccacttcgtgcttactcaattgctgctttctggagaagctgtaaacacagacacacctgctgt
atthaattttgcctttcgtatca---
ctttgtgcttacctcagctggttagtgatacctataacattttctttttaatctgattatcaaaggatgaattatgaatat
caacagttccatcttaccgcgacatttatc-----
-----
----ttacctgggatcagggtt--tggtgct---ggcaaaccaaca-----caggcgacggccatgta-----
----tgtgtcg-----tgtcta-----gagt----ttctg--ttatt-----
-----
tgatttttatcgtcttactatgattcaatgtgtaaatattgttatcgtg-----acctgccg-
aactgcctgggttggctgcttatatt-atcgacaactataaccgttccaaacagagttttt-----
ctttccattttgtcatctctga-----cgc-----atcagagaaaagaaaagggacactaatggcgta-
caaggtacaa---agacaagcacagat-----accaggcatct-----
-----gaaccggaa
```

> Jalisco\_INIFAP JSG y MAS 264\_AY108178

```
gatgccaggagctggtaatcctgctgggggtcggcccaccacctcgccctcgaccatggtgtcgtgagccttcctgggtggga
gagttctgatatttgggtgggttctgtggcgggtc----tt--
cactctgcgtcaaaaactttacctcctggatccaacggaagataagccaacctggaggcttctgaatgttccagggcatcc
tccacgggttcgcctggggccacagtaacttgtgttgcggagggacaaaggcaatagttcttggaggacaaaactggagaag
agtggacgctaactgaaatacacgagctttctctagcaagctcattagtctgaagatgggaaggtcccagcaagctttcc
agcttcttgaagcaatgtctctggagac-agctacctgttcatatgact-gagggcagat---
tttttttccaacagtggcgtgcaagcacaagcaca-----
aagggttgggtgaagaagggttgggtgaagtggacaaccagacctgattacttgtgccatgacctgggagtcagctgggtctaa
aagtaggaataagttacctctgctgctgctgttcgtagtgggtctg---ac-atgatggaatagctggcatccata----
agctaactctcagttcttatcatggttccaatgggac--tggcattgtgtcgtctggagcccc-
tgatgcaacaggtaccctgccttctgggtg-
cgcctgccttgggtgacaagtgatgctgtgggtcttctgtttttgacctatcaactgc-----tgtga-
-----agttt-----
-----
cttagttacgcttttgcgccacttctgcttactcaattgctgctttctggagaagctgtaaacacagacacacctgctgt
atthaattttgcctttcgtatca---
ctttgtgcttacctcagctggttagtgatacctataacattttcttttaactctgattatcaaaggatgaattatgaatat
caacagttccatcttacctcaacatttatcgcccgtaaatgacttgattccggcctgggtgctgaatgtaaactgcaa---
-----
ttggtttctttctcttatctgggatcaggggtt--tgggtgct---ggcaaaccaacaa-----
cagggcagcgccatgta-----tgtgtca-----tgtcca-----
gagt----ttctg--ttatt-----
-----tgatttttatcgtcttactatgattcaatgtgtaaatattgttatcgtg-----
acctgccg-aactgccttattggctgcttatatt-atcgataactataaccggttccaaacagagtttttt-----
ctttccattttgtcatctctga-----cgc-----atcagagaaagaaaaagggacactaatggcgta-
caaggtacaa---agacaagcacagat-----accaggcact-----
-----gaaccggaa
```

> Balsas\_INIFAP JSG y LOS 119\_AY108178

```
gatgccaggagctggtaatcctgctgggggtcggcccaccacctcgccctcgaccatggtgtcgtgagccttcctgggtggga
gagttctgatatttgggtgggttctgtggcgggtc----tt--
cactctgcgtcaaaaactttacctcctggatccaacggaagataagccaacctggaggcttctgaatgttccagggcatcc
tccacgggttcgcctggggccacagtaacttgtgttgcggagggacaaaggcaatagttcttggaggacaaaactggagaag
agtggacgctaactgaaatacacgagctttctctagcaagctcattagtctgaagatgggaaggtcccagcaagctttcc
agcttcttgaagcaatgtctctggagac-agctacctgttcatatgact-gagggcagat---tttttt-
ccaacagtgggtgtgcaagcacaagcacaagcacaaggggttgggtgaagaagggttgggtgaagtggacaaccagacctga
tacttgtgccgtgcctgggagtcagctgggtctaaaagtaggaataagttacctctgctgctgctgttcttatgggtctg-
--ac-atgatggaatagctggcatccata----agctaactctcagttcttatcatggttccaatgggac--
tggcattgtgtcgtctggagcccc-tgatgcaacaggtaccctgccttctgggtg-
cgcctgccttgggtgacaagtgatgctgtgggtcttctgtttttgacctatcaactgc-----tgtga-
-----agctt-----
-----
ctttgttatgcttttgcgccacttctgcttactcaattgctgctttctggagaagctgtaaacacagacacacctgctgt
atthaattttgcctttcgtatca---
ctttgtgcttacctcagctggttagtgatacctataacattttcttttaactctgattatcaaaggatgaattatgaatat
caacagttccatcttacctcgacatttatcgcgcgtaaaagacttgattctggcctgggtgctgaatgcaaactgcaa---
-----
ttggtttctttctcttacctgggatcaggggtt--tgggtgct---ggcaaaccaacaa-----
cagggcagcgccatgta-----tgtgtcg-----tgtcca-----
gagt----ttctg--ttatt-----
-----tgatttttatcgtcttactatgattcaatgtgtaaatattgtaatcgtg-----
acctgccg-aactgcctgggtggctgcttatatt-atcggaactataaccggttccaaacagagtttttt-----
ctttccattttgtcatctctga-----cgc-----atcagagaaagaaaaagggacactaatggcgta-
caaggtacaa---agacaagcacagat-----accaggcact-----
-----gaaccggaa
```

> Balsas\_Beadle & Kato Site 4\_AY108178

```
gatgccaggagctggtaatcctgctggggtcggccaccacctcgccctcgaccatggtgtcgtgagccttcctgggtggga
gagttctgatatttgggtgggttctgtggcgggtc----tt--
cactctgcgtcaaaactttacctcctggatccaacggaagataagccaacctggaggcttctgaatgttccagggcatcc
tccacgggttcgcctggggccacagtaacttgtggttgcggagggacaaaggcaatagttcttggaggacaaactggagaag
agtggacgctaactgaaatacacgagctttctctagcaagctcattagtctgaagatgggaaggtcccagcaagctttcc
agcttcttgaagcaatgtctctggagac-agctacctgttcatatgact-gaggcagat---
tttttttccaacagtgggcgtgcaagcacaagcacaagcacaaggggttgggtgaagaaggggttgggtgaagtggacaacc
agacctgattacttgtgctatgacctgggagtcagctgggtctaaaagtaggaataagttacctctgctgctgctgttcgta
tggctctg---ac-atgatggaatagctggcatccata----agctaactctcagttcttatcatgtttccaatgggac--
tggcattgtgtcgtcgtggagcccc-
tgatgcaacaggtaccctgccttctgggtggcgcttgccttcgggtgacaagtgatgctgtgggtcttctgtttttgacc
atcaactgc-----tgtga-----agctt-----
-----
ctttgttatgcttttgcgccactttgtgcttactcaattgctgctttctggagaagctgtaaacacagacacacctgctgt
atthaattttgcctttcgtatca---
ctttgtgcttacgtcagctgatagtgatacctataacattttcttttaaatctgattatcaaaggatgaattatgaatat
caacagttccatcttacctcgacatttatcgcgcgttaatgacttgattctggcctgggtgctgaatgcaaactgcaa---
-----
ttggtttctttctcttacctgggatcaggggtt--tgggtgct---ggcaaaccaacaa-----
cagggcagcggccatgta-----tgtgtcg----tgtcca-----
gagt----ttctg--ttatt-----
-----tgatttttatcgtcttactatgattcaatgtgtaaatattgttatcgtg-----
acctgccg-aactgcctggttggctgcttatatt-atcgacaactataaccgttccaaacagagttttt-----
ctttccattttgtcatctctga-----cgc-----atcagagaaagaaaaagggacactaatggcgta-
caaggtacaa---agacaagcacagat-----accaggcatt-----
-----gaaccggaa
```

> Balsas\_Wilkes Site 6\_AY108178

```
gatgccaggagctggtaatcctgctggggtcggccaccacctcgccctcgaccatggtgtcgtgagccttcctgggtggga
gagttctgatatttgggtgggttctgtggcgggtc----tt--
cactctgcgtcaaaactttacctcctggatccaacggaagataagccaacctggaggcttctgaatgttccagggcatcc
tccacgggttcgcctggggccacagtaacttgtggttgcggagggacaaaggcaatagttcttggaggacaaactggagaag
agtggacgctaactgaaatacacgagctttctctagcaagctcattagtctgaagatgggaaggtcccagcaagctttcc
agcttcttgaagcaatgtctctggagac-agctacctgttcatatgact-gaggcagat---
tttttttccaacagtggggtgcaagcacaagcaca-----aagggttgggtgaag-----
tggacaaccagacctgattacttgtgccatgcctgggagtcagctgggtctaaaagtaggaataagttacctctgctgctg
ctgttcgtagtggctg---ac-atgatggaatagctggcatccata----
agctaactctcagttcttatcatgtttccaatgggac--tggcattgtgtcgtcgtggagcccc-
tgatgcaacaggtaccctgccttctgggtggcgcttgccttcgggtgacaagtgatgctgtgggtcttctgtttttgacc
atcaactgc-----tgtga-----agctt-----
-----
cttagttatgcttttgcgccactttgtgcttactcaattgctgctttctggagaagctgtaaacacagacacacctgctgt
atthaattttgcctttcgtatca---
ctttgtgcttacctcagctgtagtgatacctataacattttcttttaaatctgattatcaaaggatgaattatgaatat
caacagttccatcttacctcgacatttatcgcgcgtcaatgacttgattctggcctgggtgatgaatgtaaactgcaa---
-----
ttggtttctttctcttatctgggatcaggggtt--tgggtgct---ggcaaaccaacaa-----
cagggcagcggccatgta-----tgtgtcg----tgtcca-----
gagt----ttctg--ttatt-----
-----tgatttttatcgtcttactatgattcaatgtgtaaatattgttatcgtg-----
acctgccg-aagtgccttattggctgcttatatt-atcgataactataaccgttccaaacagagttttt-----
ctttccattttgtcatctctga-----cgc-----atcagagaaagaaaaagggacactaatggcgta-
caaggtacaa---agacaagcacagat-----accaggcatt-----
```

-----gaaccggaa

> Jalisco\_INIFAP JSG y MAS 401\_AY108178

```
gatgccaggagctggtaatcctgctggggctggcccaccacctcgcctcgaccatggtgtcgtgagccttcctgggtggga
gagttctgatatttgggtgggttctgtggcgggtc----tt--
cactctgcgtcaaaaactttacctcctggatccaacggaagataagccaacctggaggcttctgaatggtccagggcatcc
tccacgggttcgcctggggccacagtaacttgtgttgcggagggacaaaaggcaatagttcttggaggacaaaactggagaag
agtggacgctaactgaaatacacgagctttctctagcaagctcattagtctgaagatgggaagggtcccagcaagctttcc
agcttctttgaagcaatgtctctggagac-agctacctgttcatatgact-gagggcagat---
ttttttttccaacagtggtgtgcaagcacaagcaca-----
aagggttgggtgaagaagggttgggtgaagtggacaaccagacctgattacttgtgcatgcctgggagtcagctgggtctaa
aagtaggaataagttacctctgctgctgctgttcgtaggtctg---ac-atgatggaatagctggcatccata----
agctaactcagttcttatcatggtttccaatgggac--tggcattgtgtcgtggagcccc-
tgatgcaacaggtaccctgccttctgggtggcgttgccttcgggtgacaagtgatgctgtgggtcttctgttttttgacc
atcaactgc-----tgtga-----agctt-----
-----
-----cttagttatgcttttgcgccactttgtgcttactcaattgctgctttctggagaagctgtaaca--
gacacacctgctgtatttaattttgcctttcgtatca---
ctttgtgcttacctcagctggttagtgataacctataacattttctttttaatctgattatcaaaggatgaattatgaatat
caacagttccatcttacctcgacatttatcacgcgtcaatgacttgattctggcctgggtgatgaatgtaaactgcaa---
-----
ttggtttctttctcttatctgggatcaggggtt--tgggtgct---ggcaaaccaacaa-----
cagggcagcgccatgta-----tgtgtcg----tgtcga-----
gagt---ttctg--ttatt-----
-----tgatttttatcgtcttactatgattcaatgtgtaaatattggttatcgtg-----
acctgccg-aagtgccttattggctgcttatatt-atcgataactataaccgttccaaacagagtttttt-----
ctttccattttgtcatctctga-----cgc-----atcagagaaagaaaaagggacactaatggcgta-
caaggtacaa---agacaagcacagat-----accagggcatct-----
-----gaaccggaa
```

> Balsas\_INIFAP JSG y LOS 161\_AY108178

```
gatgccaggagctggtaatcctgctggggctggcccaccacctcgcctcgaccatggtgtcgtgagccttcctgggtggga
gagttctgatatttgggtgggttctgtggcgggtc----tt--
cactctgcgtcaaaaactttacctcctggatccaacggaagataagccaacctggaggcttctgaatggtccagggcatcc
tccacgggttcgcctggggccacagtaacttgtgttgcggagggacaaaaggcaatagttcttggaggacaaaactggagaag
agtggacgctaactgaaatacacgagctttctctagcaagctcattagtctgaagatgggaagggtcccagcaagctttcc
agcttctttgaagcaatgtctctggagac-agctacctgttcatatgact-gagggcagat---
ttttttttccaacagtggtgtgcaagcacaagcaca-----
aagggttgggtgaagaagggttgggtgaagtggacaaccagacctgattacttgtgcatgcctgggagtcagctgggtctaa
aagtaggaataagttacctctgctgctgctgttcgtaggtctg---ac-atgatggaatagctggcatccata----
agctaactcagttcttatcatggtttccaatgggac--tggcattgtgtcgtggagcccc-
tgatgcaacaggtaccctgccttctgggtggcgttgccttcgggtgacaagtgatgctgtgggtcttctgttttttgacc
atcaactgc-----tgtga-----agctt-----
-----
-----cttagttatgcttttgcgccactttgtgcttactcaattgctgctttctggagaagctgtaaca--
gacacacctgctgtatttaattttgcctttcgtatca---
ctttgtgcttacctcagctggttagtgataacctataacattttctttttaatctgattatcaaaggatgaattatgaatat
caacagttccatcttacctcgacatttatcacgcgtcaatgacttgattctggcctgggtgatgaatgtaaactgcaa---
-----
ttggtttctttctcttatctgggatcaggggtt--tgggtgct---ggcaaaccaacaa-----
cagggcagcgccatgta-----tgtgtcg----tgtcga-----
gagt---ttctg--ttatt-----
-----tgatttttatcgtcttactatgattcaatgtgtaaatattggttatcgtg-----
acctgccg-aagtgccttattggctgcttatatt-atcgataactataaccgttccaaacagagtttttt-----
ctttccattttgtcatctctga-----cgc-----atcagagaaagaaaaagggacactaatggcgta-
caaggtacaa---agacaagcacagat-----accagggcatct-----
-----gaaccggaa
```

> Jalisco\_Benz 967\_AY108178

```
gatgccaggagctggtaatcctgctggggcggccaccacctcgccctcgaccatggtgtcgtgagccttcctgggtggga
gagttctgatatttgggtgggttctgtggcgggtc----tt--
cactctgcgtcaaaactttacctcctggatccaacggaagataagccaacctggaggcttctgaatgttccagggcatcc
tccacgggttcgcctggggccacagtaacttgtgttgcggagggacaaaggcaatagttcttggaggacaaactggagaag
agtggacgctaactgaaatacacgagctttctctagcaagctcattagtctgaagatgggaaggtcccagcaagctttcc
agcttctttgaagcaatgtctctggagac-agctacctgttcatatgact-gagggcagat---
tttttttccaacagtgggtgtgcaagcacaagcaca-----
aagggttgggtgaagaaggggttgggtgaagtggacaaccagacctgattacttgtgccatgcctgggagtcagctgggtctaa
aagtaggaataagttacctctgctgctgctgttcgtagtgggtctg---ac-atgatggaatagctggcatccata----
agctaactctcagttcttatcatggtttccaatgggac--tggcattgtgtcgtctggagcccc-
t gatgcaacaggtaccctgccttctgggtggcgttgccttcgggtgacaagtgatgctgtgggtcttctgttttttgacc
atcaactgc-----tgtga-----agctt-----
-----
-----ccttagttatgcttttgcgccactttgtgcttactcaattgctgctttctggagaagctgtaaca--
gacacacctgctgtatttaattttgcctttcgtatca---
ctttgtgcttacctcagctgttagtgatacctataacattttctttttaatctgattatcaaaggatgaattatgaatat
caacagttccatcttacctcgacatttatcacgcgtcaatgacttgattctggcctgggtgatgaatgtaaactgcaa---
-----
ttggtttctttctcttatctgggatcaggggtt--tgggtgct---ggcaaaccaacaa-----
cagggcagcggccatgta-----tgtgtcg-----tgtcga-----
gagt----ttctg--ttatt-----
-----tgatttttatcgtcttactatgattcaatgtgtaaatattgttatcgtg-----
acctgccg-aagtgccttattggctgcttatatt-atcgataactataaccgttccaaacagagtttttt-----
ctttccattttgtcatctctga-----cgc-----atcagagaaagaaaaagggacactaatggcgta-
caaggtacaa---agacaagcacagat-----accagggcatct-----
-----gaaccggaa
```

> Balsas\_Kato Site 4\_AY108178

```
gatgccaggagctggtaatcctgctggggcggccaccacctcgccctcgaccatggtgtcgtgagccttcctgggtggga
gagttctgatatttgggtgggttctgtggcgggtc----tt--
cactctgcgtcaaaactttacctcctggatccaacggaagataagccaacctggaggcttctgaatgttccagggcatcc
tccacgggttcgcctggggccacagtaacttgtgttgcggagggacaaaggcaatagttcttggaggacaaactggagaag
agtggacgctaactgaaatacacgagctttctctagcaagctcattagtctgaagatgggaaggtcccagcaagctttcc
ggcttcttgaagcaatgtctctggagac-agctacctgttcatatgact-gagggcagat---
tttttttccaacagtggcgtgcaagcacaagcacaagcacaaggggttgggtgaagaaggggttgggtgaagtggacaacc
agacctgattacttgtgccatgcctgggagtcagctgggtctaaaagtaggaataagttacctctgctgctgctgttcgta
tgttctg---ac-atgatggaatagctggcatccata----agctaactctcagttcttatcatggtttccaatgggac--
tggcattgtgtcgtctggagccccctgatgcaacaggtaccctgccttctgggtg-
cgcctgccgtcgggtgacaagtgatgctgtgggtcttctgttttttgaccatcaactgc-----tgtga-
-----agttt-----
-----
ccttagttacgcttttgcgccacttctgcttactcaattgctgctttctggagaagctgtaaacacagacacacctgctgt
atttaattttgcctttcgtatca---
ctttgtgcttacctcagctgttagtgatacctataacattttctttttaatctgattatcaaaggatgaattatgaatat
caacagttccatcttacctcaacatttatcgcccgttaatgacttgattccggcctgggtgctgaatgtaaactgcaa---
-----
ttggtttctttctcttatctgggatcaggggtt--tgggtgct---ggcaaaccaacaa-----
cagggcagcggccatgta-----tgtgtcg-----tgtcca-----
gagt----ttctg--ttatt-----
-----tgatttttatcgtcttactatgattcaatgtgtaaatattgttatcgtg-----
acctgccg-aactgccttattggctgcttatatt-atcgataactataaccgttccaaacagagtttttt-----
ctttccattttgtcatctctga-----cgc-----atcagagaaagaaaaagggacactaatggcgta-
caaggtacaa---agacaagcacagat-----accagggcatct-----
-----gaaccggaa
```

> Oaxaca\_INIFAP JSG 197\_AY108178

```
gatgccaggagctggtaatcctgctgggggtggccaccacctcgctcgaccatggtgctcgtgagccttctgggtggga
gagttctgatatttgggtgggttctgtggcgggtc----tt--
cactctgcgtcaaaactttacctcctggatccaacggaagataagccaacctggaggcttctgaatgttccagggcatcc
tccacgggttcgcctggggccacagtaacttgtggtgctcggagggacaaaggcaatagttcttggaggacaaactggagaag
agtggacgctaactgaaatacacgagctttctctagcaagctcattagctctgaagatgggaagggtcccagcaagctttcc
agcttcccttgaagcaatgtctctggagac-agctacctgttcatatgact-gagggcagat---ctttttt-
ccaacagtgggtgtgcaagcacaagcaca-----
aggggttgggtgaagaaggggttgggtgaagtggacaaccagacctgattacttgtgccatgcctgggagttagctgggtctaa
aagtaggaataagttacctctgctgctgctgttcgatgatctg---ac-gtgatggaatagctggcatccata----
agctaactctcagttcttatcatgtttcaaatgggacactggcattatgtcgtcggagcccc-
tgatgcaacagggaccctgccttctgggta-
cgcctgccttcgggtgacaagtgatgctgtgggtcttctgttttttgacctcaactgc-----tgtga-
-----agctt-----
-----
cttagttatgcttttgcgccacttctgtgcttactcaattgctgctttctggagaagctgtaaacacagacac--
ctgctgtatttaattttgcctttcgtatca---
ctttgtgcttacctcagctggttagtgatacctataacattttctttttaatctgattatcaaaggatgaattatgaatat
caacagttccatcttacctcgacatttatcgcgcgtcaatgacttgattctggcctgggtgatgaatgtaaaactgcaa---
-----
ttggtttctttctcttatctgggatcaggggtt--tggtgct---ggcaaaccaacaa-----
cagggcagcgccatgta-----tgtgtcg-----tgtcca-----
gagt----ttctg--ttatt-----
-----tgatttttatcgtcttactatgattcaatgtgtaaatattgttatcgtg-----
acctgccg-aagtgccttattggctgcttatatt-atcgataactataaccgttccaaacagagttttt-----
ctttccattttgtcatctctga-----cgc-----atcagagaaagaaaaagggacactaatggcgta-
caaggtacaa---agacaagcacagat-----accaggcatt-----
-----gaaccggaa
```

> Balsas\_USDA PI566686\_AY108178

```
gatgccaggagctggtaatcctgctgggggtggccaccacctcgctcgaccatggtgctcgtgagccttctgggtggga
gagttctgatatttgggtgggttctgtggcgggtc----tt--
cactctgcgtcaaaactttacctcctggatccaacggaagataagccaacctggaggcttctgaatgttccagggcatcc
tccacgggttcgcctggggccacagtaacttgtggtgctcggagggacaaaggcaatagttcttggaggacaaactggagaag
agtggacgctaactgaaatacacgagctttctctagcaagctcattagctctgaagatgggaagggtcccagcaagctttcc
agcttcccttgaagcaatgtctctggagac-agctacctgttcatatgact-gagggcagat---ctttttt-
ccaacagtgggtgtgcaagcacaagcaca-----
aggggttgggtgaagaaggggttgggtgaagtggacaaccagacctgattacttgtgccatgcctgggagttagctgggtctaa
aagtaggaataagttacctctgctgctgctgttcgatgatctg---ac-gtgatggaatagctggcatccata----
agctaactctcagttcttatcatgtttcaaatgggacactggcattatgtcgtcggagcccc-
tgatgcaacagggaccctgccttctgggta-
cgcctgccttcgggtgacaagtgatgctgtgggtcttctgttttttgacctcaactgc-----tgtga-
-----agctt-----
-----
cttagttatgcttttgcgccacttctgtgcttactcaattgctgctttctggagaagctgtaaacacagacac--
ctgctgtatttaattttgcctttcgtatca---
ctttgtgcttacctcagctggttagtgatacctataacattttctttttaatctgattatcaaaggatgaattatgaatat
caacagttccatcttacctcgacatttatcgcgcgtcaatgacttgattctggcctgggtgatgaatgtaaaactgcaa---
-----
ttggtttctttctcttatctgggatcaggggtt--tggtgct---ggcaaaccaacaa-----
cagggcagcgccatgta-----tgtgtcg-----tgtcca-----
gagt----ttctg--ttatt-----
-----tgatttttatcgtcttactatgattcaatgtgtaaatattgttatcgtg-----
acctgccg-aagtgccttattggctgcttatatt-atcgataactataaccgttccaaacagagttttt-----
ctttccattttgtcatctctga-----cgc-----atcagagaaagaaaaagggacactaatggcgta-
caaggtacaa---agacaagcacagat-----accaggcatt-----
-----gaaccggaa
```



> Balsas\_CIMMYT 8783\_AY108178

```
gatgccaggagctggtaatcctgctgggggtcggccaccacctcgctcgaccatggtgtcgtgagccttcctgggtggga
gagttctgatatttgggtgggttctgtggcgggtc----tt--
cactctgcgtcaaaaactttacctcctggatccaacggaagataagccaacctggaggcttctgaatgttccagggcatcc
tccacgggttcgcctggggccacagtaacttgtgttgcggagggacaaaggcaatagttcttggaggacaaactggagaag
agtggacgctaactgaaatacacgagctttctctagcaagctcattagtctgaagatgggaaggtcccagcaagctttcc
agcttccttgaagcaatgtctctggaaac-agctacctgttcatatgact-gagggcagat---tTTTT--
ccaacagtgggtgtgcaagcacaagcaca-----
aaggggtgggtgaagaaggggtgggtgaagtggacaaccagacctgattacttgtgccatgcctgggagtcagctgggtctaa
aagtaggaataagttacctctgctgctgatgttcgtatgggtctg---ac-atgatggaatagctggcatccata----
agctaactctcagttcttatcatgtttccaattgga-----gctggagcccc-
tgatgcaacaggtaccctgccttctgggtg-
cgcctgccttcgggtgacaagtgatgctgtgggtcttctgtttttgactcatcaactgc-----tgtga-
-----agctt-----
-----
ctttgttatgcttttgcgccactttgtgcttactcaattgctgctttctggagaagctgtaaacacagacacacctgctgt
atthaattttgcctttcgtatca---
ctttgtgcttacctcagctggttagtgatacctataacattttcttttaactctgattatcaaaggatgaattatgaatgt
caacagttccatcttacctcgacatttatcg--cgtcaatgacttgattctggcctgggtgatgaatgcaaactgcaa---
-----
ttgggttctttctcttatctgggatcaggggtt--tggtgct---ggcaaactacaa-----
cagggcagcggccatgta-----tgtgtcg----tgtcca-----
gagt----ttctg--ttatt-----
-----tgatttttatcgtcttactatgattcaatgtgtaaatattgttatcgtg-----
acctgccg-aactgcctgggtggctgcttatatt-atcgataactataaccgttccaaacagagtttttc-----
ctttccattttgtcatctctga-----cgc-----atcagagaaagaaaaagggacactaatggcgta-
caaggtacaa---agacaagcacagat-----accagacatct-----
-----gaaccggaa
```

> Balsas\_INIFAP JSG y LOS 109\_AY108178

```
gatgccaggagctggtaatcctgctgggggtcggccaccacctcgctcgaccatggtgtcgtgagccttcctgggtggga
gagttctgatatttgggtgggttctgtggcgggtc----tt--
cactctgcgtcaaaaactttacctcctggatccaacggaagataagccaacctggaggcttctgaatgttccagggcatcc
tccacgggttcgcctggggccacagtaacttgtgttgcggagggacaaaggcaatagttcttggaggacaaactggagaag
agtggacgctaactgaaatacacgagctttctctagcaagctcattagtctgaagatgggaaggtcccagcaagctttcc
agcttccttgaagcaatgtctctggagac-agctacctgttcatatgact-gagggcagat---
TTTTTTTccaacagtgggtgtgcaagcacaagcaca-----aaggggtgggtgaag---
gggtgggtgaagtggacaaccagacctgattacttgtgccatgcctgggagtcagctgggtctaaaagtaggaataagttac
ctctgctgctgctgtttgtatgggtctg---ac-atgatggaatagctggcatccata----
agctaactctcagttcttatcatgtttccaatgggac--tggcattgtgtcgctggagcccc-
tgatgcaacaggtaccctgccttctgggtggcgcttgccttcgggtgacaagtgatgctgtgggtcttctgtttttgacct
atcaactgc-----tgtga-----agctt-----
-----
cttagttatgcttttgcgccactttgtgcttactcaattgctgctttctggagaagctgtaaacacagacacacctgctgt
atthaattttgcctttcgtatca---
ctttgtgcttacgtcagctgatagtggtacctataacattttcttttaactctgattatcaaaggatgaattatgaatat
caacagttccatcttacctcgacatttatggcgcgtaa-----tgtaaactgcaa---
-----
ttgggttgtttctcttacttgggatcaggggtt--tggtgct---ggcaaaccaacaa-----
cagggcagcggccatgta-----tatgtcg----tgtcca-----
gagt----tt--g--ttatt-----
-----tgatttttatcgtcttactatgattcgatgtgtaaatattgttatcgtg-----
acctgccg-aactgcctgggtggctgcttatatt-atcgataactataaccgttccaaacagagtttttt-----
ctttccattttgtcatctctga-----cgc-----atcagag--agaaaaagggacactaatggcgta-
caaggtac-----acagat-----accggcatct-----
```

-----gaaccggaa

>Tripsacum\_WW-2120\_haplotype1\_AY108178

```
gatgccaggagctggtaatcctgctgggatcgggccaccacctcgcctcgatcatggttgcctgagccttctggtggga
gagttctgatatttgggtgggtctgtggcgggtc----tt--
cactccgcgtcaaaactttacctcctggatccaactgaagagaagccaacctggaggcttctgaatgttccagggcatcc
tccacgggttcgcctggggccacagtagcttctgtgttggaggggacaaaggcaatagttcttggaggacaaactggagaag
agtggacgctaactgaaatacacgagcttctctagcaagctcattagctgaagatttgaagggtcccagcaagcttccc
agcttcccttgaagcaatgtctccggagaccagctacctgttcatatgact-gagggcagata--
tttttttccaacagtgggggtgcaagcaca-----aagggttgggtgaag-----
tggacaaccggacctgattacttgtgccatgcctgggagtcggctggctagaagtaggaataagttacctctgctgttg
ctgtttgtatggtcta---ac-atgatggaatagctgggtatctata-
ataagctaactcctcggttcttatcatggtttccaatgggac--tggcattgtgtagctggagcccc-
tgatgcaacaggtaccctgccttctggtgg-
cgcctgccgtcgggtgacaagtgatgctgtggtcttctgggttttgacctcaactgc-----tgtga-
-----agctt-----
-----
tttagttatgcttttgcgccactttgtgctactcaattgctgcttctggagaagctgtaacacaaacacacctgctgt
atthaatttggctttcgtatcatcactccatgcttacctcagctgatagtgaaacctataacattttccttttaactcg
attatcaaagg-----
atgagtatcaacaattccatcttacctttacatttatcgctagttgatgacttgattccggcctgggtgctgaatgtcaac
tgcaa-----
ttgggttcttctcttacctgggatcaggggtt--tgggtgggt---ggcaaaccaaca-----
ggcgacggacatgtg-----tctgtcg-----tgtcca-----
gagt----tctcg--ttatt-----
-----
tgatttctatcgtctcactatgattcaatgtgtaaataattgttatcgtgtcctgccatctctgggtggacctgccg-
cgctgcctgattagctgcttatatt-
atcgataactataaccgggtccaacagagtttttttcttttcttcccattttgccatctctga-----cgc-----
----atcagagaaagaaaaagggacactgatg-cgta-caaag-
acgaccacagataaacgaagattcagaggcaatgag-----agccaggcattttcgagccactc-----
---aaatgaaccggaa
```

>Tripsacum\_WW-2120\_haplotype2\_AY108178

```
gatgccaggagctggtaatcctgctgggatcgggccaccacctcgcctcgatcatggttgcctgagccttctggtggga
gagttctgatatttgggtgggtctgtggcgggtc----tt--
cactccgcgtcaaaactttacctcctggatccaactgaagagaagccaacctggaggcttctgaatgttccagggcatcc
tccacgggttcgcctggggccacagtagcttctgtgttggaggggacaaaggcaatagttcttggaggacaaactggagaag
agtggacgctaactgaaatacacgagcttctctagcaagctcattagctgaagatttgaagggtcccagcaagcttccc
agcttcccttgaagcaatgtctccggagaccagctacctgttcatatgact-gagggcagata--
tttttttccaacagtgggggtgcaagcaca-----aagggttgggtgaag-----
tggacaaccggacctgattacttgtgccatgcctgggagtcggctggctagaagtaggaataagttacctctgctgttg
ctgtttgtatggtcta---ac-atgatggaatagctgggtatctata-
ataagctaactcctcggttcttatcatggtttccaatgggac--tggcattgtgtagctggagcccc-
tgatgcaacaggtaccctgccttctggtgg-
cgcctgccgtcgggtgacaagtgatgctgtggtcttctgggttttgacctcaactgc-----tgtga-
-----agctt-----
-----
tttagttatgcttttgcgccactttgtgctactcaattgctgcttctggagaagctgtaacacaaacacacctgctgt
atthaatttggctttcgtatcatcactccatgcttacctcagctgatagtgaaacctataacattttccttttaactcg
attatcaaagg-----
atgagtatcaacaattccatcttacctttacatttatcgctagttgatgacttgattccggcctgggtgctgaatgtcaac
tgcaa-----
ttgggttcttctcttacctgggatcaggggtt--tgggtgggt---ggcaaaccaaca-----
ggcgacggacatgtg-----tctgtcg-----tgtcca-----
gagt----tctcg--ttatt-----
-----
```

tgatttctatcgtctcactatgattcaatgtgtaaataattgttatcgtgtcctgccatctctgggtggacctgccg-  
cgctgcctgattagctgcttatt-  
atcgataactataaccgggtccaaacagagtttttttcttttcttcccattttgccatctctga-----cgc-----  
----atcagagaaagaaaaagggacactgatg-cgta-aaaag-  
acgaccacagataaacgaagattcagaggcaatgag-----agccaggcattttcgagccactc-----  
---aaatgaaccggaa

>Tripsacum\_MIA 34597\_AY108178

gatgccaggaactagtaatcctgctggagttggcccgcctcgctcgatcatggtgctgtgagccttctgggtggga  
gagtttggatatttgggtgggtccgtggcaggtcgaggtcgccattctgcttcaaaactttacctcctggatccaactgaa  
gagaagccgacctggaggcttctgaatgctccagggcatctccacgggtcgctctggggctacagtaacttgtgtgtgtgg  
agggacaaaggcaatagttcttggaggagaaactaga-----  
acgctaactgaaatacatgagcttctctagcaagctcattagctcgaagatgggaagggtccagcaagctttgcatctt  
ccttgaagcaatgtctctggagaccagctacctctcatgtgact-  
gacgctgttttttttttttcccaacagtggggtgcaagca-----aaagggttg---aag-----  
---

tggacaaccagacctgattacttgtgccatgcctgggagtaggctggctagaattaggaataagttacctttgctgttg  
gtgtttgtatagtctacctaccatgatgaaatagctggcatccgtccattagctaactctcagttcttatcatgttgcaa  
ggggat--tcacattgttcagctggagccc--tgatgcaacaggtactctgcgcttctgggtgg-cgcc-  
atcgtccgtgacaagtgattctgtgggtcttccgaattttgggtccgtcagctgccgcttctggcgaagctgtaacactat  
cgagcctgttcgctgcagcttatttccggctgcggctgcggcttctacagtgtttgtctctatggattctagctgcagca  
gtagtttgcagctgcaacagtagccaaataagtgcaagccgaacacgcccatcgtctttagtaaatgcttatgcctcacttc  
gtgcttactcaactcctgctttccg-agaagctgtaacgcaaacac--ctgttgtatttaattttg-ctttcgtatca--  
-ctttgtgcttacctcaggtgatagcgataacttgaacattttcttttggatctgat-----  
gaatgtcgacaattccatcttatctgtacatatatctcgcgttaatgacttgc-----  
gcctgacgctgaatgtcaactgcgaaagggtctctggaaaaaattctatgtacaagtaacttctccgatatggctcctgtaag  
tattagacttttttttcttaggtctcttctctcttagctgggattaggattcgtgggtggcagaggcaatccaacaagtaag  
gatccagcgacagccatgtgatctcaagagtttctgtttagggcttggttgttccgatatggattgaaggggatgggtatgg  
attgagtgagattttgacttactagggattgaaacctactcaatccccctcaatccatattggattggagttgaaacgaac  
atgcccttacgtgggttccatcttactacgattcattgtttaatgggttaccatgacctgccagtaactgttagac  
ctgcaggaactgattgattggctgtttatattgatcgataaactgtaaccgg-ccaa---gagttct-----  
ccatctcgccatctctaaaaagctctcttttttttggctcagagaaagaaaaagggatactgatg-cgtaacaaag-  
acgaccacaaaaaacgaagattaagaggcaatgagctgcccgctcctggcaagccagcatcttctagccactgggtgtt  
tcaaagcgaaccggaa

>B73\_AY106616

-----  
cgtggagatgctcagggagctgctcgacgagtcacgcgtgctcgacgtatctcgacatccggtggatccaccgtgctgcatg  
ccgccgctgggagagggcagctgcaggtgagccatccacatttgcactgcttaaatcacatcttctgcaaatgcttatt  
agctgttcttgcgtgtaagagcatcttcaaaagactctttatttttgattctctatttgcactcttatttgtcactctata  
aagattaaactctaaatataacatcttattacaacagactctccaacatgcaagttagcttggctagtgagggaggtcaat  
ttagagagctggatagcttgtcaatttaaatggctagcctgttggagagctattttgctattaagttagctaaaatttagc  
ttgacaagctatttagctagctctctttagatgctcctaaagcctggatccttacgcgaatgattcttatgtgcaaatgcag  
tattctg-cggatccctacagtaatgttatt-----aaaaatacatgggaaagtg-----  
ggagagacatgagatttaccagtgctc-----taaccaaagtgcagcta-  
gcatctccaagagactagctaaatagcttgtgaaagctaaatttttagcaacttaattgcataatagctctccaacagacta  
gccatttgcacttctaatctatctggctctctaaatgaactctctcactagttaaatttggctagcaactctcgctagcc  
aagctaaacttgtatattggagagctctgttggaaatcaattgttatatatagagtttaatatatttggagatataaataaag  
ggttaaatagagagtcacaaataaaga--  
gtctcttggagatgctcctaacagttgagaagcatctccctcttgaacatgcctttactgtgggatattgtaggtgggaca  
ctttcaaatatccagccatttctatatttctagatgcagcgtgccattattattacgacttccatgtt-----  
-----  
gactcttatttaggatgattacgtgcttttccggatcctagtttcttctagttcttcatgttgaatgctcagtttagcaa

ggatctgcgtacagactacagacgatgcatttcattgaaaactactgtgtgcttgtatTTTTctcagctagggtgggtattg  
gaaaggaaattgttctctagaaaagtcacctaagatcacttt-gtttagttcagaaattccataaagttttttttt-  
aaagaacagacacaatgctactgataaaggaacatcaacaagttttatagttcaatgtcacagtaatacaacttccagat  
ggcgaatgttcccttgaggggcccgttccgtttttttc-----  
-cggaatagaggcatggaacaattcctagccggtttggtttct-----  
ctaatttatataagttttgatcagttggaataattcctgggtcattcctggacaaaacgaacaagacctta-----  
-----  
gtgattttaatccctggccctgggttatcgtaatcctgcataacagtatattaagccaggggtgctcactgtgtacttggttgg  
ccagactttcttattttcatttattgggtatgatactgagcacagttatcagctcacacagttgggtggccataatgggtagg  
tagtttagtttagacataaaaa-----  
ggtaggtttgttgccaatcaatatgtccctttccaataacgtgataacagagtgaaatagcttctctgttggttccagttta  
actcacaagat-----  
tcaccagaaagatctagctttttatatctacaaaacttcttgggtgatgctatgcagccaaaacatctatccatttccctggt  
gatgatacgcagacagctctgttactgttccgtgatggtgctatgcaaccgtct--tttttgctactctca--  
gttgtgccaatgaatcggaaagtttcccttttctatgcctcatggttgtaagcataaccttatgcaggttgtcaagtacctt  
gtggcctctttcgacataatcaattcgactgataatcacgggaacacagcgtgcatgtagcggcctaccgagggcacca  
acctgtcgtggaagccttgggtgctgctcctcatcaacctgtcagttgtcaacaacgcgggtgacagtttctccact  
cggcagttacaggattcaggaccccaggattccgacggctcgaccggcagttggagctgatgaggtacctacacgcgag  
agaaccgcggatatacagaagatcatcaacctgagaaacgacgcgggcttacagctcttcacctggctgtgggtggctg  
cgcacaccggatctcgtcgagctactgatggccaccccgtccatcgacctgaacgctgaagacgctaatggcatgaccg  
cgctggcgtgctgaagcagcagctgctcagcgacgtccgaccggctcatcaagcagatcgtctctgcccggaggggtc  
ttgaactccagcatcctgagaaccgggtcagccatcgcttctcagatcaagatgcagggcgggatcgcgagcagccccgg  
caccactttcaaggtatcggatgcggagatattcctgttctccggcatgggagcggcggagctctcagggccaagctcct  
gctccagcaacgggaaggatgatgaccctactcacgcagacgcagactgcgcccgagaaccgtggatcgtcg---  
gagaagaggctgagctccgcgagccgggccaagaccgctcaagatgatgctgagatggcctcgccacaaggacaagac  
gccaagaagttagaggacagcagccgctggggctgatcagcaggctgaacgagcagcggggccgagaccctgctccgc  
tgaggcagaagtttaccagaagcagcggcgtcaacggcaagcggaccctagcgggtgaagagctccaccccgagctcctca  
tccaccaagaagaagctcaacacgaagctcatccacggcatcatggaggccatgccacagctggcgccatctacggcgcg  
gtccgcgtccccgacggacactttcctgaggtcctcggtatcgtccacgcgcagcggctggcgaagctgaaggacatct  
gcctcgacgacagatctccatgggtgacgcgcccggcggcaggctgaaggatagtgacgacgcatggaggacccctcg  
tggccaacactcgtccatggacgacggctgtggcgcggggacggcagagagcgcggcccggaagcaggggtcgggcaa  
cgggaggtcatcaacatcgtcttggcgcgacgggcccaccgtggaggactcggcgagcgggacgacagcagcaaga  
tgttcaagcagcagtgctcaggggtgctcgtattgacg-----  
gcgtgggtgctcgaactacaac-----  
agcgtgggtgattgggttgggtgctcgcgctgacgctatgtgtgcttggtttggctttg-----  
ctccttgcacagccagcgggtgaactgggtgatccaatgaacttgtgcttgtgtt-----

>Mo17\_AY106616

-----  
ggcagggggcgggagcgtggagatgctcagggagctgctcgaggagtccagcgtgctcgacgtatctcgacatccgtggat  
ccaccgtgctgcatgccgctgggagagggcagctgcaggtgagccatccacatttgctactgcttgcacacatctt  
ctgcaaatgcttattagctgttcttggctgtaag-----  
-----  
-----  
cctggatcattacgcgaatgattcttatgtgcaaatgcagatattctggcggatccctacagtaatgttatt----  
aaaaaataatttaaaaaatacatgggaaagtg-----ggagagatatgagatttaccagtgctc-----  
taaccaagtgcagcta-----ttgtggctgtgggtttca-----  
-----ttcta-----  
-----  
taacagttgagaagcatctccctcttgaacatgcctttactgtgggatattgttaggtgggacactttcaaatatccaacc  
atctctatatttctagatgcagcgtgccattattattacgacttccatggt-----  
-----gactcttatttaggatgattacgtgcttttccggatcctaatttcccttctagttcttcat-----  
--  
tcagtttagcaaggatctgcgtacagactacagacgatgcatttcattaaaaactactgtgtgcttgtatTTTTctcagct  
aggttggattggaaaggaaattgttctctagaaaagtcacctaagatcacttt-

gttagttcagcaattccataaagttttttt-  
aaagaactgacacaatgctattgataaaggagcatcaacaagttttatagttcaatgtgacagtaatacaacttccagat  
ggcgaatgttccttgagggctcgttcatttgtccaggatttagaccaggattcattccaacttaggccttgttcgtttcta  
tcggattgggtgggtcggaacgattcctgaccggattgtttct-----  
ctaatttatataaactttgatttagctggaaccattccgggtgcaatccgacggaaacgaacaaggccttatcaaaactta  
cataaattagagaaacaatccggccaggaaccgttccaggccttcaatccgtgaaaaagaacaggccctgagtgatttta  
atccctggccctggttatcgtaatcctgcataacagtatattaagccagggtgtcactgtgtacttgttggccagacttt  
cttatttcatatttggatgatactgagcatagttatcagctcacacagttgggtggccataatgggtaggttagtttagt  
tagacataaaa-----  
ggtggctttgtttccaatcaatatgtccctttccaataacgtgataaacagagtgaatatgcttccctgttgttccagttta  
actcacaagat-----  
tcaccagaagatctagctttttatataccacaaacttcttgggtgatgctatgcagccaaaacatctatccatttccctgtt  
gatgatagcagacagctctgttactgttccctgatgttgctatgcaaccgtct--tttttgctactctca--  
gttgtgccaatgaatcggaagtttctctttctatgcctcatggttgaagcataccttatgcagggtgtcaagtacctt  
gtggcctctttcgacataatcaattcgactgataatcacgggaacacagcgtgcatgtagcggcctaccgagggcacca  
acctgtcgtggaagccttgggttgcgtcctccatcaacctgtcagttgtcaacaacgcgggtgacacgtttctccact  
cggcagttacaggattcaggaccccaggattccgacggctcgaccgcccagttggagctgatgaggtacctatacgcgag  
agaaccgaggatataccagaagatcatcaacctgagaaacgacgcgggcttacagctcttccctggctgtgggtggctg  
cgcacaccggatctcgtcgagctactgatggccaccccgtccatcgacctgaacgctgaagacgctaataggcatgaccg  
cgctggcgtgctgaagcagcagctgcgtcagcgacgtccgaccggctcatcaagcagatcgtctctgcccggaggggtc  
ttgaactccagcatcctgagaaccagggtcagccatcgcttctcagatcaagatgcagggcgggatcgcgagcagcccgg  
caccactttcaaggtatcggatgaggagatattcctgttctcgggcatgggagcggcgaggctctcaggccaagctcct  
gctccagcaacgggaaggatgatgaccctactcacgcagacgcagactgcgcccgagaaccgtggatcgtcg---  
gagaagaggctgagctccgagcggggccaaagaccgcctcaagatgatgctgagatggcctcgccacaaggacaagac  
gcccagaagtcagaggacagcagcccgtggggtcgatcagcaggctgaacgagcagcggggccgagaccctgctccgc  
tgaggcagaagttaccaagacgacggcgtcaacggcaagcggaccctagcgggtgaagagctccaccccgagctcctca  
tcaccaagaagaagctcaacacgaagctcatccacggcatcatggaggccatgccacagctggcgccatctacggcgcg  
gtccgcgtccccgacggacactttcctgaggtcctcgggtatcgtccacgcgcagcggctggcgaagctgaaggacatct  
gcctcgacgacgagatctccatggtgacgcgcggccggcaggctgaaggatagtgacgacgccatggaggacccctcg  
tgctccaacaactcgtccatggacgacggctgtggcgccgggacggcagagagcgcggcccggaagcaggggtgcccga  
cgggaggtcatcaacatcgtcttggcgcgagggtcctcacgctggaggactcggcgagcgggacgagcagagcaaga  
tgttcaagcagcagtcctcagggtgctcgtattgacg-----  
gcgtggtgctcgcactacaac-----  
agcgtggtgctgattgggttgggtgctcgcgctgacgctatgtgtgcttgtttgctttg-----  
ctccttgacagccagcgggtgaactggtgatccaatgaacttgtgcttgtgtt-----

>CML69\_AY106616

-----

ggcggggggcgggagcgtggagatgctcagggagctgctcgacgagtcagcgtgtcgacgtatctcgacatccgtggat  
ccaccgtgctgcatgccgcgctgggagagggcagctgcagggtgagccatccacatttgctactgcttaaatcacatctt  
ctgcaaatgcttattagctgttcttgcgtgtaagagcatcttcaaaagactctttatttttgattctctatttgactcttt  
atttgtcactctataaagattaaactctaaatataacatcttattacaacagactctccaacatgcaagttagcttggct  
agtggaggagtcatttagagagctggatagcttgtcaattttaaaggttagcctggtggagagctattttgcattaaag  
tagctaaaatttagcttgacaagctatttagctagctctcttgttagatgctcctaagcctggatccttacgcgaatgatctt  
tatgtgcaaatgcagttattctg-cggatccctacagtaattgttatt-----  
aaaaaatacatgggaaagtg-----ggagagacatgagatttaccagtgttc-----taaccaaagtgcgcta-  
gcatctccaagagactagctaaatagcttgtgaagctaaatttttagcaacttaattgcataatagctctccaacagacta  
gccatttgaacttctaactctatctggctctctaaatgaactctctcactagttaaatttggctagcaactctcgctagcc  
aagctaacttgcataattggagagctcgttgggaatcaattggttatatatagagtttaataatttatggagatataaataaag  
ggttaaatagagagtcgcaaaaataaaga--  
gtctcttggagatgctcctaacagttgagaagcatctccctcttgaacatgcctttactgtgggatattttaggtgggaca  
ctttcaaatatccagccatttctatatttctagatgcagcgtgccattattattacgacttccatggt-----  
-----  
gactcttatttaggatgattacgtgcttttccggatcctagtttcttctagttcttcatggtggaatgctcagtttagcaa  
ggatctgcgtacagactacagacgatgcatttcatgaaaactactgtgtgcttgtattttctcagctaggttgggtattg  
gaaaggaaattgttctctagaaagtcacctaagatcacttt-gttagttcagaaattccataaagttttttt-  
aaagaacagacacaatgctactgataaaggaaacatcaacaagttttatagttcaatgtcacagtaatacaacttccagat

ggcgaatgttccttgaggggcccgttcgttttttc-----  
-cggaatagaggcatggaacaattcctagccggtttgttct-----  
ctaatttatataagttttgatcagttggaataattcctgggttcattcctggacaaacgaacaagacctta-----  
-----  
gtgattttaatccctggccctgggttatcgtaatcctgcataacagtatattaagccaggggtgctcactgtgacttgttgg  
ccagactttcttatttctatttattgggtatgatactgagcacagttatcagctcacacagttgggtggccataatgggtagg  
tagtttagtttagacataaaaa-----  
gggtggctttggtgccaatcaatatgtccctttccaataacgtgataacagagtgaaatgcttctctggttggttccagttta  
actcacaagat-----  
tcaccagaaagatctagctttttatctacaaaacttcttgggtgatgctatgcagccaaaacatctatccatttctggt  
gatgatacgcagacagctctgttactgttccgtgatgttgcctatgcaaccgctct--tttttgcctactctca--  
gttgtgccaatgaatcggaagtttctctttctatgcctcatggtgtaagcataacctatgcaggttgtcaagtaacct  
gtggcctctttcgacataaatcaattcgactgataatcacgggaacacagcgcctgcatgtagcggcctaccgagggcacca  
acctgtcgtggaagccttgggtgctgctcctcatcaaccttgtcagttgtcaacaacgcgggtgacacggttctccact  
cggcagttacaggattcaggaccccaggattccgacggctcgaccgacctgaggctgatgaggtacctcatacgcgag  
agaaccgcggatataccagaagatcatcaacctgagaaacgacgcgggcttacagctcttcacctggctgtggttggctg  
cgcacaccggatctcgtcgagctactgatggccaccccgctccatcgacctgaacgctgaagacgctaattggcatgaccg  
cgctggcgtgctgaagcagcagctgctcagcgcagctccgaccggctcatcaagcagatcgtctctgcccggaggggtc  
ttgaaactccagcatcctgagaaccgggtcagccatcgcttctcagatcaagatgcagggcggggatcgcgagcagcccgg  
caccactttcaaggtatcggatgctggagatattcctgttctcggcatgggagcggcggagctctctgaggccaagctcct  
gctccagcaacgggaaggatgatgacctactcacgcagacgcagactgcgcccgagaaccgtggatcgtcg---  
gagaagaggctgagctccgcgagccgggccaagaccgctcaagatgatgctgagatggcctcgccacaaggacaagac  
gccaagaagttagaggacagcagcccgctggggctgatcagcaggctgaacgagcagcggggccgagaccctgctccgc  
tgaggcagaagtttaccagaagcagcggcgtcaacggcaagcggaccctagcgggtgaagagctccaccccgagctcctca  
tccaccaagaagaagctcaacacgaagctcatccacggcatcatggaggccatgccacagctggcgccatctacggcgcg  
gtccgcgtccccgacggacactttcctgaggtcctcgggtatcgtccacgcccgcagccgctggcgaagctgaaggacatct  
gcctcgacgacgagatctccatgggtgacgcgcccggcggcaggctgaaggatagtgacgacgccatggaggacccctcg  
tgctccaacaactcgtccatggacgacggctgtggcgccgggacggcagagagcgcggcccggaagcaggggtgcccga  
cgggaggctcatcaacatctgctttggcgcgaggggcctcaccgtggaggactcggcgagcggggcagcagacgagcaaga  
tgttcaagcagcagtgctcagggtgctcctgattgacg-----  
gcgtgggtgctcgcactacaac----  
agcgtgggtgattgggttgggtgctcgcgtgcagctatgtgtgcttggtttggctttg-----  
ctccttgacagccagcgggtgaactgggtgatccaatgaactt-----

>NC350\_AY106616

-----  
gcgtggagatgctcagggagctgctcgacgagctccagcgtgctgcagctatctcgacatccgtggatccaccgtgctgcat  
gccgcgctgggagagggcagctgcaggtgagccatccacatttgctactgcttaaatacacatctctgcaaatgcttat  
tagctgttcttgcgtgtaagagcatcttcaaaagactctttatttttgattctctatctttagctctttatttgtcactctat  
aaagattaaactctaaatataacatcttattacaacagactctccaacatgcaagttagcttggctagtgagggagctcaa  
tttagagagctggatagcttgtcaatttaaatggctagcctggtggagagctattttgctatattaagtagctaaaatttag  
cttgacaagctattttagctagtctcttgttagatgctctaagcctggatccttacgcgaatgattcttatgtgcaaatgca  
gtattctg-cggatccctacagtaattgttatt-----aaaaatacatgggaaagtg-----  
ggagagacatgagatttaccagtggtc-----taaccaaagtgcagcta-  
gcatctccaagagactagctaaatagcttgtgaagctaaattttagcaacttaattgcataatagctctccaacagacta  
gccatttgactttctaactctatctggctctctaaatgaactctctcactagttaaatttggctagcaactctcgctagcc  
aagctaacttgtatattggagagctctgttggaaatcaattggttatatatagagtttaataattttaggagatataaataaag  
ggttaaatagagagctcaaaaataaaga--  
gtctcttggagatgctctaacagttgagaagcatctccctcttgaacatgcctttactgtgggatattgtaggtgggaca  
ctttcaaatatccggccatttctatatttctagatgcagcgtgccattattattacgacttccatggt-----  
-----  
gactcttatttaggatgattacgtgcttttccggatcctaatttctctagttcttcatggtgaaatgctcagtttagcaa  
ggatctgcgtacagactacagacgatgcatttcttgaactactgtgtgcttgtattttctcagctaggttggtagctg  
gaa-ggaaattgttctctagaaagtcacctaagatcacttttggtagttcagaaattccataaagttttttttt-  
aaagaacagacacaatgctactgataaaggagcatcaacaagttttatagttcaatgtgacagtaatacaacttccagat  
ggcgaatgttccttgaggccttggttcatttgtgc-----  
-cggatttgtgggtcggaaacgatttctaaccggattgcttct-----

ctaatttatataaaactttgatttagctgaaatgattccgggtgcaatccgacacaaacgaacaaggcctta-----  
-----gtgatt--  
-----  
aagccaggggtgtcactgtttacttgttggccagactttcttatttcatatttgggtatgatactgagcacagttaccagc  
tcacacagtaggtggccataatgggttaggttagtttagttagacataaaa-----  
gggtggcctttgttggcaatcaatatgtccctttccaataacgtgataacagagtgaaatggttacctggtggtccagttta  
tctcacaagat-----  
tcaccagaaagatctagctttttatatccacaaaacttcttgggtgatgctatgcagccaaaacatctatccatttctggt  
gatgatacgcagacagctctgttactgttccctgatgttgctatgcaaccgtctcttttttggctactctca--  
gttgtgccaatgaatcggaaagtttctctttctatgcctcatggttgaagcataccttatgcaggttgtcaagtaacct  
gtggcctctttcgacataatcaattcgactgataatcacgggaacacagcgtgcatgtagcggcctaccgagggcacca  
acctgctgtaggaagccttgggtgctgctgctccatcaaccttgtcagttgtcaacaacgcgggtgacagtttctccact  
cggcagttacaggattcaggaccaccaggattccgacggctcgaccggcagttggagctcatgaggtacctcatacgcgag  
agaaccgcggatattcagaagatcatcaacctgagaaacgacgcgggccttacagctcttcacctggctgtgggtggctg  
cgcacaccggatctcgtcgagctactgatggccaccctccatcgacctgaacgctgaagacgctaattggcatgaccg  
cgctggcgtgctgaagcagcagctgcttccagcagctccgaccggctcatcaagcagatcgtctctgcccggaggggtc  
ttgaactccagcatcctgagaaccgggtcagccatcgcttctcagatcaagatgcagggcgggatcgcgagcagcccgg  
caccactttcaaggtatcggatgcccggagatattcctgttctccggcatgggagcggcggagttctgaggccaagctcct  
gctccagcaacgggaaggatgatgacctactcacgcagacgcagactgcgcccgagaaccgtggatcgtcg---  
gagaagagggctgagctccgcgagcggggccaaagaccgcctcaagatgatgctgagatggcctcgccacaaggacaagac  
gccaagaagttagaggacagcagcccgtggggctgatcagcaggctgaacgagcagcggggccgagaccctgctccgc  
tgaggcagaagttaccaagacgacggcgtcaacggcaagcggaccctagcgggtgaagagctccaccocgagctcctca  
tccaccaagaagaagctcaacacgaagctcatccacggcatcatggaggccatgccacagctggcgcctctacggcgcg  
gtccgcgtccccgacggacactttcctgaggtcctcgggtatcgtccacgcccagccgtggcgaagctgaaggacatct  
gcctcgacgacgagatctccatggtgacgcccgcggcggcaggtgaaggatagtgacgacgcatggaggaccctcg  
tgctccaacaactcgtccatggacgacggctgtggcgcggggacggcagagagcgcggcccggaagcaggggtgcccga  
cgggaggtcatcaacatctgcttggcgcgagggcctcaccgtggaggactcggcagcggggcagcagacgagcaaga  
tgttcaagcagcagtgctcagggtgctcctgattgacg-----  
gcgtgggtgctcgcactacaac-----  
agcgtgggtgattgggttgggtgctcgcggtgacgctatgtgtgcttgtttgctttg-----  
ctccttgacagccagcgggtgaactgggtgatccaatgaacttgtgc-----

>KUI11\_AY106616

-----  
gcgtgctgacgtatctcgacatccgtggatccaccgtgctgcatgccgcgctgggagagggcagctgcaggtgagccat  
ccacatttgctactgcttaaatcacatcttctgcaaatgcttattagctgttcttctgctgtaagagcatcttcaaaagact  
ctttatttttgatttcttatttgactctttatttgtcactctataaagattaaactctaaatataacatcttattacaac  
agactctccaacatgcaagttagcttggctagtggggagtcaatttagagagctggatagcttgtcaatttaaatggct  
agcctgttggagagctattttgcatttaagttagctaaaatttagcttgacaagctatttagctagtctcttgtagatgct  
ctaagcctggatccttacgcgaatgattcttatgtgcaaatgcagtatctg-cggatccctacagtaattgttatt----  
-----aaaaatacatgggaaagtg-----ggagagacatgagatttaccagtgctc-----  
taaccaaagttagctat-  
gcatctccaagagacttagctaaatagcttgtgaagctaaatttttagcaacttaattgcataatagctctccaacagacta  
gccatttgactttctaactatctggctctctaaatgaactctctcactagttaaatttggctagcaactctcgctagcc  
aagctaaacttgatattggagagctctgttggaaatcaattggttatatatagagtttaatatatttggagatataaataaag  
ggttaaatagagagtcaaaaataaaga--  
gtctcttggagatgctctaacagttgagaagcatctccctcttgaacatgcctttactgtgggatattgtaggtgggaca  
ctttcaaatatccggcatttctatatttctagatgcagcgtgccattattattacgacttccatggt-----  
-----  
gactcttatttaggatgattacgtgcttttccggatcctaatttcttctagttcttcatggtgaaatgctcagtttagcaa  
ggatctgcgtacagactacagacgatgcatttcattgaaaactactgtgtgcttgtattttctcagctaggttggtagc  
gaa-ggaaattgttctctagaaagtcacctaagatcacttttggtagttcagaaattccataaagttttttttt-  
aaagaacagacacaatgctactgataaaggagcatcaacaagttttatagttcaatgtgacagtaatacaacttccagat  
ggcgaatgttcttggaggccttgttcatttgtgc-----  
-cggatttggggcggaaacgatttctaacggattgcttct-----  
ctaatttatataaaactttgatttagctgaaatgattccgggtgcaatccgacacaaacgaacaaggcctta-----  
-----gtgatt--

-----  
aagccaggggtgctactgtttacttgggtggccagacttttctattttcattttattggtatgatactgagcacagttaccagc  
tcacacagtaggtggccataatgggttaggttagtttagtagacataaaa-----  
ggtaggctttggtgccaatcaatatgtccctttccaataacgtgataacagagtgaaatggttacctggtggtccagttta  
tctcacaagat-----  
tcaccagaaagatctagctttttatatccacaaaacttcttgggtgatgctatgcagccaaaacatctatccatttccctggt  
gatgatacgcagacagctctgttactgttccctgatggtgctatgcaaccgtctcttttttggctactctca--  
gttgtgccaatgaatcggaaagtttccctctttctatgcctcatggttgaagcataccttatgcaggttgtcaagtacctt  
gtggcctctttcgacataatcaattcgactgataatcacgggaacacagcgtgcatgtagcggcctaccgagggcacca  
acctgtcgtggaagccttgggtgctgctctccatcaaccttgtcagttgtcaacaacgcgggtgacacggttctccact  
cggcagttacaggattcaggaccccaggattccgacggctcgaccggcagttggagctcatgaggtacctcacaacgcgag  
agaacccggatccagaagatcatcaacctgagaacgcagcgggccttacagctctccacctggctggttggctg  
cgcacaccggatctcgtcgagctactgatggccaccctccatcgacctgaacgctgaacgctaatggcatgaccg  
cgtggcgtgctgaagcagcagctgcttccagcagcgtccgaccggctcatcaagcagatcgtctctgcccggaggggtc  
ttgaactccagcatcctgagaaccgggtcagccatcgcttctcagatcaagatgcagggcgggatcgcgagcagcccgg  
caccactttcaaggtatcggatgcccagatattcctggttctccggcatgggagcggcggagctctcgaggccaagctcct  
gctccagcaacgggaaggatgatgaccctactcacgcagacgcagactgcccggagaaccgtggatcgtcg---  
gagaagagggtgagctccgagcagccgggccaagaccgctcaagatgatgctgagatggcctcgccacaaggacaagac  
gccaagaagttagaggacagcagcccgtgggggtcgatcagcaggctgaacgagcagcggggccgagaccctgctccgc  
tgaggcagaagtttaccagaacgcagcggcgtcaacggcaagcggaccctagcgggtgaagagctccaccccgagctcctca  
tccaccaagaagaagctcaacacgaagctcatccacggcatcatggaggccatgccacagctggcggcctctacggcgcg  
gtccgcgtccccgacggacactttcctgaggtcctcggatcgtccacgcgcagccgctggcgaagctgaaggacatct  
gcctcgacgacgagatctccatgggtgacgcccgcggcggcaggctgaaggatagtgacgacgcatggaggaccctcg  
tgctccaacaactcgtccatggacgacggctgtggcgcgggacggcagagagcgcggcccggaagcaggggtgcccga  
cgggaggtcatcaacatctgctttggcgcgcagggcctcaccgtggaggactcggcagcgggacgagcagcagcaaga  
tgttcaagcagcagtgctcagggtgctcctgattgacg-----  
gcgtgggtgctcgcactacaac----  
agcgtgggtgattgggttgggtgctcgcgtgacgctatgtgtgcttgggttggctttg-----  
ctccttgacagccagcgggtgaactgggtgatccaatgaactt-----

>CML247\_AY106616

-----  
gcgtggagatgctcagggagctgctcgacgagtcagcgtgctcgacgtatctcgacatccgtggatccaccgtgctgcat  
gcccgcgtgggagagggcagctgcaggtgagccatccacatttgetactgcttaaatacacatcttctgcaaatgcttat  
tagctgttcttctgctgtaagagcatcttcaaaagactctttatttttgattctctatctttagactctttatttgtcactctat  
aaagattaaactctaaataaacatcttattacaacagactctccaacatgcaagttagcttggctagtggggaggtcaa  
tttagagagctggatagcttgtcaattttaaaggttagcctggtggagagctattttggctattaagtagctaaaatttag  
cttgacaagctattttagctagtctcttgttagatgctctaagcctggatccttacgcgaatgattcttatgtgcaaatgca  
gtattctg-cggatccctacagtaattgttatt-----aaaaatacatgggaaagtg-----  
ggagagacatgagatttaccagtggtc-----taaccaaagtgcagcta-  
gcatctccaagagactagctaaatagcttgtgaaagctaaatttttagcaacttaattgcataatagctctccaacagacta  
gccatttgactttctaatactatctggctctctaaatgaactctctcactagttaaatttggctagcaactctcgctagcc  
aagctaaactgtatattggagagctggttggaaatcaattggttatatatagagtttaatatatttgagatataaataaag  
ggttaaataagagagtcaaaaataaaga--  
gtctcttggagatgctctaacagttgagaagcatctccctcttgaacatgcctttactgtgggatattgtaggtgggaca  
ctttcaaatatccggccatttctatatttctagatgcagcgtgccattattattacgacttccatggt-----  
-----  
gactcttatttaggatgattacgtgcttttccggatcctaatttcttctagttcttcatggtgaaatgctcagtttagcaa  
ggatctcgtacagactacagacgagtcatttcatgaaaactactgtgtgcttgtatcttctcagctaggttggtagctg  
gaa-ggaaattgttccctctagaaagtcacctaagatcacttttggtagttcagaaattccataaagttttttt-  
aaagaacagacacaatgctactgataaaggagcatcaacaagttttatagttcaatgtgacagtaatacaacttccagat  
ggcgaatgttccctgaggccttgttccatttgtgc-----  
-cggatttgtgggtcggaaagatttctaaccggattgcttct-----  
ctaatttatataaaactttgattagctgaaatgattccgggtgcaatccgacacaaaacgaacaaggcctta-----  
-----gtgattt--  
-----  
aagccaggggtgctactgtttacttgggtggccagacttttctattttcattttattggtatgatactgagcacagttaccagc



tcacacagtaggtggccataatgggtaggtagtttagtttagacataaaa-----  
ggtaggtttggttgccaatcaatatgtccctttccaataacgtgataacagagtgaaatggttacctggtggtccagttta  
tctcacaagat-----  
tcaccagaaagatctagctttttatatccacaaaacttcttgggtgatgctatgcagccaaaacatctatccatttccctggt  
gatgatacgcagacagctctggtactggtccctgatggtgctatgcaaccgtctcttttttggctactctca--  
ggtggtgccaatgaatcggaaagtttccctctttctatgcctcatggttgtaagcataccttatgcagggttgtaagtagcctt  
gtggcctctttcgacataatcaattcgactgataatcacgggaacacagcgtgcatgtagcggcctaccgagggcacca  
acctgctggtggaagccttgggtgctgctcctcaaccttgtcagttgtcaacaacgcgggtgacaggttctcact  
cggcagttacaggattcaggaccccaggattccgacggctcgaccggcagttggagctcatgaggtacctatacgcgag  
agaaccgcggatataccagaagatcatcaacctgagaaaacgacgcgggcttacagctctcactggctggtggtggtg  
cgcacaccggatctcgtcgagctactgatggccaccccgctccatcgacctgaacgctgaagacgctaatggcatgaccg  
cgtggcgctgctgaagcagcagctgcttcagcgcagctccgaccggctcatcaagcagatcgtctctgcccggaggggtc  
ttgactccagatcctgagaaccgggtcagccatcgcttctcagatcaagatgcagggcgggagcgcgagcagccccgg  
caccactttcaaggtatcggatgcggagatattcctggtctcggcatgggagcggcggagctctgaggccaagctcct  
gctccagcaacgggaaggatgatgaccctactcacgcagacgcagactgcgcccagaaacgtggatcgtcg---  
gagaagaggctgagctccgcgagcggggccaaagaccgctcaagatgatgctgagatggcctcgccacaaggacaagac  
gccaagaagttagaggacagcagcccgctggggctgatcagcaggctgaacgagcagcggggccgagaccctgctccgc  
tgaggcagaagtttaccagaagcagcggcgtcaacggcaagcggaccctagcgggtgaagagctccaccccgagctcctca  
tccaccaagaagaagctcaacacgaagctcatccacggcatcatggaggccatgccacagctggcggcctctacggcgcg  
gtccgcgtccccgacggacactttcctgaggtcctcggtatcgtccacgcgcagcgcgtggcgaagctgaaggacatct  
gcctcgacgacgagatctccatggtgacgcgcccgccggcaggctgaaggatagtgacgacgccatggaggaccctcg  
tgctccaacaactcgtccatggacgacggctgtggcgcgggacggcagagagcgcggcccggaagcaggggtgcccga  
cgggaggctcatcaacatctgctttggcgcgcagggcctcaccgtggaggactcggcgcgagggcagcagcagcaaga  
tgttcaagcagcagtgctcagggtgctcctgattgacg-----  
gcgtggtgctcgcactacaac----  
agcgtggtgctgattggtttggtgctcgcgctgagctatggtgcttggttgctttg-----  
ctccttgacagccagcgggtgaactggtgatccaatgaactt-----

>CML322\_AY106616

-----  
gcgtggagatgctcagggagctgctcgacgagtcagcgtgctcgagctatctcgacatccgtggatccaccgtgctgcat  
gccgcgctgggagagggcagctgcagggtgagccatccacatcttctgcaaatgcttat  
tagctggtcttctgctgtaagagcatcttcaaaagactctttatcttctgactctttatcttctgactcttat  
aaagattaaactctaaatataacatcttattacaacagactctccaacatgcaagttagcttggctagttagggaggtcaa  
tttagagagctggatagcttgtcaatctaaatggctagcctggtggagagctatcttctgctatctaaatgtagctaaaat  
cttgacaagctatcttagctagctctcttctgtagatgctcctaagcctggatccttacgcgaatgattcttatgctgcaaatgca  
gtattctg-cggatccctacagtaattgttatt-----aaaaatacatgggaaagt-----  
ggagagacatgagatttaccagtggtc-----taaccaaagttagcta-  
gcatctccaagagactagctaaatagcttgtgaagctaaatcttagcaacttaattgcataatagctctccaacagacta  
gccatttgactttctaatctatctggctctctaaatgaactctctcactagttaaatctggctagcaactctcgctagcc  
aagctaacttgatattggagagctggttggaaatcaattggttatatatagagtttaatatgtaggagatataaataaag  
ggttaaatagagagtcacaaataaaga--  
gtctcttggagatgctcacaagcttgagaagcactcctcctcttgaacatgctttactgtagggatattgtaggtgggaca  
ctttcaaatatccagccatttctatatttctagatgcagcgtgccattattattacgacttccatggt-----  
-----  
gactcttatttaggatgattacgtgcttttccggatcctagtttcttctagttcttcatggtgaaatgctcagtttagcaa  
ggatctgcgtacagactacagacgatgcatcttcttgaactactggtgcttgtatcttctcagctaggttggtattg  
gaaaggaaattgctcctctagaaagtacctaagatcacttt-gttagttcagaaattccataaagttttttt-  
aaagaacagacacaatgctactgataaaggaacatcaacaagttttatagttcaatgtcacagtaatacaactccagat  
ggcgaatggtccttgaggggcccgttctggttttct-----  
-cggaatagaggcatggaacaattcctagccgggttggtttct-----  
ctaatttatataagttttgatcagttggaataattcctggttcattcctggacaaaacgaacaagacctta-----  
-----  
gtgatttttaatccctggccctgggttatcgtaactcctgcataacagctatattaagccaggggtgctcactggtgacttgtgg  
ccagactttcttatttctatttattgggtatgatactgagcacagttatcagctcacacagttgggtggccataatgggtagg  
tagtttagtttagacataaaa-----  
ggtaggtttggttgccaatcaatatgtccctttccaataacgtgataacagagtgaaatgcttccctggtggtccagttta

actcacaagat-----  
tcaccagaaagatctagctttttatatctacaaacttcttgggtgatgctatgcagccaaaacatctatccatttctctgtt  
gatgatacgcagacagctctgttactgttccgctgatgttgctatgcaaccgtct--tttttgctactctca--  
gttgtgccaatgaatcggaaagtttctctttctatgcctcatggttgaagcatacctatgcaggttgtcaagtacctt  
gtggcctctttcgacataatcaattcgactgataatcacgggaacacagcgcctgcatgtagcggcctaccgagggcacca  
acctgtcgtggaagccttgggttgcgtctccatcaaccttgtcagttgtcaacaacgcgggtgacacgtttctccact  
cggcagttacaggattcaggaccccaggattccgacggctcgaccgccagttggagctgatgaggtacctcatacgcgag  
agaaccgcggatatacagaagatcatcaacctgagaaacgacgcgggccttacagctcttcacctggctgtggttggctg  
cgcacaccggatctcgtcgagctactgatggccaccccgctccatcgacctgaacgctgaagacgctaattggcatgaccg  
cgctggcgtgctgaagcagcagctgcgctcagcgcagctccgaccggctcatcaagcagatcgtctctgccggaggggtc  
ttgaactccagcatctgagaaccgggtcagccatcgcttctcagatcaagatgcagggcggggatcgcgagcagccccgg  
caccatttcaaggtatcggatgcggagatattcctgttctccggcatgggagcggcgggatctctgagggcaagctcct  
gctccagcaacgggaaggatgatgaccctactcagcgcagcgcagactgcgcccagagaaccgtggatcgtcg---  
gagaagaggctgagctccgagcgggccaagaccgcctcaagatgatgctgagatggcctcgccacaaggacaagac  
gccaagaagtgcagaggacagcagcccgctggggctgatcagcaggctgaacgagcagggggcgagaccctgctccgc  
tgaggcagaagttaccaagacgacggcgtcaacggcaagcggaccctagcgggtgaagagctccaccccgagctcctca  
tcaccaagaagaagctcaacacgaagctcatccacggcatcatggaggccatgccacagctggcgccatctacggcgcg  
gtccgctccccgacggacactttcctgaggtcctcgggtatcgtccacgcccgcagccgctggcgaagctgaaggacatct  
gcctcgacgacgagatctccatgggtgacgcgcccgccggcaggctgaaggatagtgcgacgcccattggaggaccctcg  
tgctccaacaactcgtccatggacgacggctgtggcgccgggacggcagagagcgcggcccggaagcaggggtgcccga  
cgggaggctcatcaacatctgctttggcgccagggcctcaccgtggaggactcggcgagcgggacgagcagcagcaaga  
tgttcaagcagcagtgctcagggtgtcctgattgacg-----  
gcgtggtgtctcgactacaac----  
agcgtggtgtgattgggttgggtgtctcgcgtgcagctatgtgtgcttgggttggctttg-----  
ctccttgcacagccagcgggtgaactggtgatccaatgaactt-----

>KUI3\_AY106616

-----  
gagcgtggagatgctcagggagctgctcgacgagctccagcgtgtcgacgctatctcgacatccgtggatccaccgtgctgc  
atgccgcgctgggagagggcagctgcaggtgagccatccacatttgctactgcttaaatacacatctctgcaaatgctt  
attagctgttcttgcgtgaagagcatcttcaaaagactctttatttttgattctctatctttagctctttatttgtcactct  
ataaagattaaactctaaatataacatcttattacaacagactctccaacatgcaagttagcttggctagtggggagtc  
aatttagagagctggatagcttgtcaattttaaattggctagcctggtggagagctattttgcattaaagttagctaaaatt  
agcttgacaagctatttagctagtctctttagatgctctaaagcctggatccttacgcgaatgattcttatgtgcaaatg  
cagtatctg-cggatccctacagtaattgttatt-----aaaaatacatgggaaagtg-----  
ggagagacatgagatttaccagtgctc-----taaccaaagtgcgcta-  
gcactctcaagagactagctaaatagcttgtgaagctaaatttttagcaacttaattgcataatagctctccaacagacta  
gccatttgactttctaatctatctggctctctaaatgaactctctcactagttaaatttggctagcaactctcgctagcc  
aagctaacttgtatattggagagctctgttggaaatcaattgttatatatagagtttaatatatttaggagatataaataaag  
ggttaaatagagagtcacaaaataaaga--  
gtctcttggagatgctctaacagttgagaagcatctccctcttgaacatgcctttactgtgggatattgttaggtgggaca  
ctttcaaatatccggccatttctatatttctagatgcagcgtgccattattattacgacttccatgct-----  
-----  
gactcttatttaggatgattacgtgcttttccggatcctaatttcttctagttcttcatggtgaaatgctcagtttagcaa  
ggatctgcgtacagactacagacgatgcatttcattgaaaactactgtgtgcttgtattttctcagctaggttggtagctg  
gaa-ggaaattgttctctagaaagtccactaaagatcacttttggtagttcagaaattccataaagttttttt-  
aaagaacagacacaatgctactgataaaggagcatcaacaagttttatagttcaatgtgacagtaatacaacttccagat  
ggcgaatgttcttggagccttgttcatttgtgc-----  
-cggatttggggcggaacgatttctaaccggattgcttct-----  
ctaatttatataaactttgatttagctgaaatgattccgggtgcaatccgacacaaacgaacaaggcctta-----  
-----gtgattt-  
-----  
aagccaggggtgctcactgtttacttgttggccagactttcttatttctatttgggtatgatactgagcagcttaccagc  
tcacacagtaggtggccataatgggttaggttagtttagttagacataaaa-----  
gggtggctttgttgccaatcaatatgtccctttccaataacgtgataacagagtgaaatggttacctgttgggtccagttta  
tctcacaagat-----  
tcaccagaaagatctagctttttatatccacaaacttcttgggtgatgctatgcagccaaaacatctatccatttctctgtt

gacgatacgcagacagctctgttactgttccctgatgttgctatgcaaccgtct--tttttgcactctca--  
gttgtgccaatgaatcggaaagtttcctctttctatgcctcatgttgtaagcataccttatgcaggttgtcaagtacctt  
gtggcctctttcgacataatcaattcgactgataatcacgggaacacagcgtgcatgtagcggcctaccgagggcacca  
acctgtcgtggaagccttgggttgctgctccatcaacctgtcagttgtcaacaacgccggtgacacgtttctccact  
cggcagttacaggattcaggaccccaggattccgacggctcgaccgccagttggagctgatgaggtacctcatacgcgag  
agaaccgcggatatacagaagatcatcaacctgagaaacgacgcgggccttacagctcttcacctggctgtgggtggctg  
cgcacaccggatctcgtcgagctactgatggccaccccgtccatcgacctgaacgctgaagacgctaattggcatgaccg  
cgctggcgtgctgaagcagcagctgctcagcagcgtccgaccggctcatcaagcagatcgtctctgcccggaggggtc  
ttgaactccagcatcctgagaaccgggtcagccatcgcttctcagatcaagatgcagggcgggatcgcgagcagccccgg  
caccactttcaaggtatcggatgcccagatattcctgttctccggcatgggagcggcggagtctctgaggccaagctcct  
gctccagcaacgggaaggtgatgacctactcacgcagacgcagactgcgcgagaaccgtggatcgtcg---  
gagaagaggctgagctccgcgagccgggccaagaccgctcaagatgatgctgagatggcctcgccacaaggacaagac  
gcccaagaagttagaggacagcagcccgctggggctcgatcagcaggtgaacgagcagcggggccgagacccctgctccgc  
tgaggcagaagttaccaagacgacggcgtcaacggcaagcggaccctagcggggaagagctccacccgagctcctca  
tccaccaagaagaagctcaacacgaagctcatccacggcatcatggaggccatgccacagctggcgccatctacggcgcg  
gtccgcgtccccgacggacactttcctgaggtcctcggatcgtccacgcgcagccgctggcgaagctgaaggacatct  
gcctcgacgacgagatctccatgggtgacgcgcgcgcggcaggctgaaggatagtgacgacgccatggaggacccctcg  
tgctccaacaactcgtccatggacgacggctgtggcgccgggacggcagagagcgcggcccggaagcaggggtgcccga  
cgggaggctcatcaacatctgctttggcgcgaggcctcaccgtggaggactcggcgagcgggcagcagacgagcaaga  
tgttcaagcagcagtgctcagggtgtcctgattgacg-----  
gcgtgggtgtctcgactacaac----  
agcgtgggtgtgattgggttgggtgtctcgcgtgcagctatgtgtgcttggttgctttg-----  
ctccttgacagccagcggggaactgggtgatccaatgaactg-----

>Ky21\_AY106616

-----  
agcgtggagatgctcagggagctgctcgaggagtccagcgtgtcgacgtatctcgacatccgtggatccaccgtgctgca  
tgccgcgctgggagagggcagctgcaggtgagccatccacatttgctactgcttgcatcacatcttctgcaaatgctta  
ttagctgttcttgctgtaag-----  
-----  
-----  
cctggatccttacgcgaatgattcttatgtgcaaatgcagtattctg-  
cggatccctacagtaatgttttttttaaaaaagattaaaaaaatacatttggaagtg-----  
ggagagatatgagatttaccagtgctc-----taaccaaagtcagcta-----  
ttgt-----gggtttca-----tctca-----  
-----  
-----  
taacagttgagaagcatctccctcttgaacatgcctttactgtgggatattgtaggtgggacactttcaaagatccagcc  
atctctatatttctagatgcagcgtgccattattattacgacttccatggt-----  
-----  
gactcttatttaggatgattacgtgcttttcggatcctaatttctcttagttttcatggtgaaatgctcagtttagcaa  
ggatctgcgtacagactacagacgaagcatttcatataaaactactgtgtgcttgatatttctcagctaggttggatg  
gaaaggaaattgttctctagaaagtcacctaagatcacttt-  
gttagttcagcaatcccataagtttttttaagaactgacacaatgctactgataaaggagcatcaacaagttttat  
agttcaatgtgacagtaatacaacttccagatggcgaatgttcccttgag-----tgatttt-----  
-----aatccctggcc-----  
-----ctggtta-----tc-----gtaatcc----tgcataa-----ca-----  
-----  
gatatatt-----  
aagccaggggtgctcactgtgtaactgttggccagactttcttatttctatttattgggtatgatactgagcagcttatcagc  
tcacacagttgggtggccataatgggttaggtagtttagtttagacataaaa-----  
gggtggctttgttgccaatcaatatgtccctttccaataacgtgataacagagtgaaatgcttccctgttggttccagttta  
actcacaagat-----  
tcaccagaaagatctagctttttatctacaaacttcttgggtgatgctatgcagccaaaacatctatccatttctgtt  
gatgatacgcagacagctctgttactgttccctgatgttgctatgcaaccgtct--tttttgcactctca--

gttgtgccaatgaatcggaaagtttctctttctatgcctcatgttgtaagcataccttatgcagggtgtcaagtacctt  
gtggcctctttcgacataatcaattcgactgataatcacgggaacacagcgcctgcatgtagcggcctaccgagggcacca  
acctgtcgtggaagccttgggtgctgctccatcaaccttgtcagttgtcaacaacgccggtgacacgtttctccact  
cggcagttacaggattcaggaccccaggattccgacggctcgaccgccagttggagctgatgaggtacctatacgcgag  
agaaccgcggatattcagaagatcatcaacctgagaaacgacgcgggccttacagctcttcacctggctgtgggtggctg  
cgcacaccggatctcgtcgagctactgatggccaccccgctccatcgacctgaacgctgaagacgctaattggcatgaccg  
cgctggcgtgctgaagcagcagctgcgctcagcagcgtccgaccggctcatcaagcagatcgtctctgccggaggggtc  
ttgaaactccagcatcctgagaaccagggtcagccatcgcttctcagatcaagatgcagggcgggatcgcgagcagcccgg  
caccactttcaaggtatcggatgaggagatattcctgttctcgggcatgggagcggcggagtctctgaggccaagctcct  
gctccagcaacgggaaggatgatgacctactcacgcagacgcagactgcgcccagaaaccgtggatcgtcg---  
gagaagaggctgagctccgcgagccgggccaagaccgctcaagatgatgctgagatggcctcgccacaaggacaagac  
gccaagaagtacaggacagcagcccgcctggggctgatcagcaggctgaacgagcagcggggccgagacccctgctccgc  
tgaggcagaagttaccaagcagcagcggcctcaacggcaagcggaccctagcggggaagagctccaccccagctcctca  
tccaccaagaagaagctcaacacgaagctcatccacggcatcatggaggccatgccacagctggcgcctctacggcgcg  
gtccgcgtccccgacggacactttcctgaggctcctcggatcgtccacgcgcgagccgctggcgaagctgaaggacatct  
gcctcgacgacgagatctccatgggtgacgcgcccgccggcaggctgaaggatagtacgacgcccattggaggacccctcg  
tgctccaacaactcgtccatggacgacggctgtggcgcgggacggcagagagcgcggcccggaagcaggggtgaggcaa  
cgggaggctcatcaacatctgctttggcgcgagggcctcaccgtggaggactcggcgcgagcgggacgacgagcaaga  
tgttcaagcagcagtgctcagggtgtcctgattgacg-----  
gcgtgggtgtctcgactacaac----  
agcgtgggtgattgggttgggtgtctcgcgtgcagctatgtgtgcttggttgctttg-----  
ctccttgacagccagcggatgaactggtgatccaatgaactg-----

>CML333\_AY106616

-----  
aggggcgggagcgtggagatgctcagggagctgctcgaggagctccagcgtgctcgacgtatctcgacatccgtggatccac  
cgtgctgcatgccgccgctgggagagggcagctgcaggtgagccatccacatttgctactgcttgcatcacatcttctac  
aatgcttattagctgttcttgcgtgtaag-----  
-----  
-----

cctggatccttacgcgaatgattcttatgtgcaaatgcagatattctg-cggatccctacagtaatgctatt----  
aaaaaagatttaaaaaatacatgggaaagtg-----ggagagatatgagatttaccagtgctc-----  
taaccaaagtcagcta-----ttgt-----gggtttca-----  
-----ttcta-----  
-----

taacagttgagaagcatctccctcttgaacatgcctttactgtgggatattgttaggtgggacactttcaaatatccggcc  
atctctatatttctagatgcagcgtgccattattattacgacttccatggt-----  
-----

gactcttatttaggatgattacgtgcttttcggatcctaatttccttctagttcttcatggtgaaatgctcagtttagcaa  
ggatctgcgtacagactacagacgatgcatcttattgaaaactactgtgtgcttgtattttctcagctaggttggtagc  
gaa-ggaaattgttctctagaaagtcacctaagatcacttttggtagttcagaaattccataaagttttttttt-  
aaagaacagacacaatgctactgataaaggagcatcaacaagttttatagttcaatgtgacagtaatacaacttccagat  
ggcgaatgttcttgaggccttgttcatcttgc-----  
-cggatttgtgggtcggaaacgatttctaaccggattgcttct-----  
ctaatttatataaaactttgattagctgaaatgattccgggtgcaatccgacacaaacgaacaaggcctta-----  
-----gtgattt--  
-----

aagccaggggtgctactgtttacttgggtggccagactttcttatttcttatttgggtatgatactgagcaggttaccagc  
tcacacagtaggtggccataatgggtaggtagtttagtttagacataaaa-----  
gggtgctttgttgcgaatcaatatgtccctttccaataacgtgataacagagtgaaatggttacctgttgttccagttta  
actcacaagat-----  
tcaccagaaagatctagctttttatataccacaaacttcttgggtgatgctatgcagccaaaacatctatccatttctgct  
gacgatacgcgacagcctctgttactgttccctgatgttgcctatgcaaccgtct--tttttgcctactctca--  
gttgtgccaatgaatcggaaagtttctctttctatgcctcatgttgtaagcataccttatgcagggtgtcaagtacctt  
gtggcctctttcgacataatcaattcgactgataatcacgggaacacagcgcctgcatgtagcggcctaccgagggcacca

acctgtcgtggaagccttgggttgcgtctccatcaaccttgtcagttgtcaacaacgcgggtgacacgtttctccact  
cggcagttacaggattcaggaccccaggattccgacggctcgaccgccagttggagctgatgaggtacctatacgcgag  
agaaccgcggatatacagaagatcatcaacctgagaaacgacgcgggcttacagctcttcacctggctgtgggtggctg  
cgcacaccggatctcgtcgagctactgatggccaccccgtccatcgacctgaacgctgaagacgctaataggcatgaccg  
cgctggcgtgctgaagcagcagctgctcagcagcgtccgaccggctcatcaagcagatcgtctctgccggaggggtc  
ttgaaactccagcatcctgagaaccgggtcagccatcgcttctcagatcaagatgcagggcgggatcgcgagcagccccgg  
caccactttcaaggtatcggatgcggagatattcctgttctccggcatgggagcggcggagtctctgaggccaagctcct  
gctccagcaacgggaaggatgatgaccctactcacgcagacgcagactgcgcccgagaaccgtggatcgtcg---  
gagaagaggctgagctccgcgagccgggccaagaccgctcaagatgatgctgagatggcctcgccacaaggacaagac  
gcccagaagtacaggacagcagccccgctggggctgatcagcaggctgaacgagcagcggggccgagaccctgctccgc  
tgaggcagaagtttaccagaacgacggcgctcaacggcaagcggaccctagcgggtgaagagctccaccccgagctcctca  
tccaccaagaagaagctcaacacgaagctcatccacggcatcatggaggccatgccacagctggcgccatctacggcgcg  
gtccgcgctccccgacggacactttcctgaggtcctcggtatcgtccacgcccagcgcgctggcgaagctgaaggacatct  
gcctcgacgacgagatctccatgggtgacgcgcgcggcggcaggctgaaggatagtgacgacgcatggaggaccctcg  
tgctccaacaactcgtccatggacgacggctgtggcgccgggagcagagagcgcggcccggaagcaggggtgcccga  
cgggaggtcatcaacatctgctttggcgcgagggcctcaccgtggaggactcggcgagcgggacgagcagcagcaaga  
tgttcaagcagcagtgctcaggggtgctcctgattgacg-----  
gcgtgggtgctcgcactacaac----  
agcgtgggtgattgggttgggtgctcgcgctgcagctatgtgtgcttggtttgctttg-----  
ctccttgcacagccagcgggtgaactgggtgatccaatgaact-----

>IL14H\_AY106616

-----  
cgtggagatgctcagggagctgctcgaggagtccagcgtgctcgacgtatctcgacatccgctggatccaccgtgctgcatg  
ccgccgctgggagagggcagctgcaggtgagccatccacatttgcctactgcttgcacatcttctgcaaatgcttatt  
agctgttcttgcgtgtaag-----  
-----

-----  
cctggatccttacgcgaatgattccttatgtgcaaatgcagatattctg-cggatcc-tacagtaatgttatt----  
aaaaaagattaaaaaaatacatgggaaagtgagaggggaagggagagatatgagatttaccagtggtcaagttctaacca  
aagt--g-taa-----gtgt-----tgaagtgt-----taagtggataa-----  
-----acta-----ccttct--cctatc-agct-----taagcttttg----ggttgaact-ggtagtg-  
cgtccact-----ctaa----taca-----aaatcagctattgt-----  
-----gggtttc-----

atctctgtaacagttgagaagcattcctccttgaacatgtctttacagtcggatattgttaggtgggacactttcaaatat  
ccagccatttctatatatttctagatgcagcgtgccattattattatggcttccatgtt-----  
-----

gcctcttatttaggatgattacattatcttccggatcctgatttcttctagttcttcatgttgaatgctcagtttagcaa  
ggatctgcgtacagactacagacgaagcatttcatataaaaactaccgtgtgcttgtatcttctcagctaggttggatg  
gaaaggaaattgttccctctagaaagtcacctaagatcacttt-  
gttagttcagaaatcccataaggttttttttaagaactgacacaatgctactgataaaggagcatcaacaagttttat  
agttcaatgtgacagtaatacaacttccagatggcgaatgttcccttgag-----tgattt-----  
-----aatccctggcc-----  
-----ctggtta-----tc-----gtaatcc----tgcataa-----ca-----  
-----

gtatatt-----  
aagccaggggtgctcactgtgacttgggtggccagactttcttatttcatatttgggtatgatactgagcagcagctatcagc  
tcacacagttgggtggccataatgggtaggtagtttagttagacataaaa-----  
gggtggctttggttccaatcaatatgtccctttccaataacgtgataacagagtgaaatgcttccctgctgttccagttta  
actcacaagat-----  
tcaccagaaagatctagctttttatataccacaaaacttcttgggtgatgctatgcagccaaaacatctatccatttccgtt  
gatgatagcagacagctctgttactgttccgctgatgttgcctatgcaaccgtct--tttttgcctactctca--  
gttgtgccaatgaatcggaaagtttcttcttctatgcctcatgttgaagcataccttatgcaggttgtcaagtaacctt  
gtggcctctttcgacataatcaattcgactgataatcacgggaacacagcgcgtgcatgtagcggcctaccgagggcacca  
acctgtcgtggaagccttgggttgcgtctccatcaaccttgtcagttgtcaacaacgcgggtgacacgtttctccact  
cggcagttacaggattcaggaccccaggattccgacggctcgaccgccagttggagctgatgaggtacctatacgcgag

agaaccgcgatataccagaagatcatcaacctgagaaacgacgcgggcttacagctcttcacctggctgtgggtggctg  
cgcacaccggatctcgtcgagctactgatggccaccccgctccatcgacctgaacgctgaagacgctaataggcatgaccg  
cgctggcgctgctgaagcagcagctgcgctcagcgcgctccgaccggctcatcaagcagatcgtctctgccggaggggtc  
ttgaactccagcatcctgagaaccgggtcagccatcgcttctcagatcaagatgcagggcgggatcgcgagcagccccgg  
caccactttcaaggtatcggatgaggatatactcctgcttctccggcatgggagcggcgaggctctcaggccaagctcct  
gctccagcaacgggaaggatgatgaccctactcacgcagacgcagactgcccggagaaccgtggatcgtcg---  
gagaagaggctgagctccgcgagcggggccaaagaccgcctcaagatgatgctgagatggcctcgccacaaggacaagac  
gcccagaagtcagaggacagcagccccgctggggctgatcagcaggctgaacgagcagcggggccgagaccctgctccgc  
tgaggcagaagtttaccagaacgacggcgctcaacggcaagcggaccctagcgggtgaagagctccaccccgagctcctca  
tccaccaagaagaagctcaacacgaagctcatccacggcatcatggaggccatgccacagctggcgccatctacggcgcg  
gtccgcgtccccgacggacactttcctgaggtcctcggtatcgtccacgcgcagcgcgctggcgaagctgaaggacatct  
gcctcgacgacgagatctccatgggtgacgcgcggccggcggcaggctgaaggatagtgacgacgccatggaggacccctcg  
tgctccaacaactcgtccatggacgacggctgtggcgccgggacggcagagagcgcggcccggaagcaggggtgaggcaa  
cgggaggtcatcaacatctgctttggcgcgaggccctcaccgtggaggactcggcgagcggggcagcagcagagaaga  
tgttcaagcagcagtgctcagggtgctcctgattgacg-----  
gcgtgggtgctcgcactacaac----  
agcgtgggtgattgggttgggtgctcgcgtgacgctatgtgtgcttgggttggcttg-----  
ctccttgacagccagcgggtgaactgggtgatccaatgaacttgtgcttgtgtt-----

>M37W\_AY106616

-----  
gcgggagcgtggagatgctcagggagctgctcgaggagtccagcgtgctgcagctatctcgacatccgtggatccaccgtg  
ctgcatgccgcgctgggagagggcagctgcaggtgagccatccacatttgctactgcttgcatacacatcttctgcaaat  
gcttattagctgttcttggctgtaag-----  
-----

-----  
cctggatccttacgcgaatgattccttatgtgcaaatgcagatctctggcgatccctacagtaatgttatt----  
aaaaaagattaaaaaatacatgggaaagtgcaggggagagagatgatgattaccaggttcaagttcctaacca  
aagt--g-taa-----gtgt-----tgaagtga-----taagtggataa-----  
-----acta-----ccttct--cctatc-agct-----taagcttttg----ggttgaact-ggttagtg-  
cgtccact-----ctaa----taca-----aaatcagctattgt-----  
-----gggtttc-----

attctgtaacagttgagaagcactcctccttgaacatgtctttacagctcggatattgttaggtgggacactttcaaatat  
ccagccatttctatatcttagatgcagcgtgccattattattatggcttccatgtt-----  
-----

gcctcttatttaggatgattacattatcttggatcctgatttcttctagttcttcatggtgaaatgctcagtttagcaa  
ggatctgcgtacagactacagacgaagcatttcatataaaactactgtgtgcttgtatcttctcagctaggttggatag  
gaaaggaaattgttctctagaaagtcacctaagatcacttt-  
gttagttcagaaatcccataagtttttttaagaactgacacaatgctactgataaaggagcatcaacaagttttat  
agttcaatgtgacagtaatacaacttccagatggcgaatgttcccttgag-----tgatttt-----  
-----aatccctggcc-----  
-----ctggtta-----tc-----gtaatcc---tgcataa-----ca-----  
-----

gtatatt-----  
aagccaggggtgctcactgtgacttgggtggccagacttcttatttcatatttggatgatactgagcagcagctatcagc  
tcacacagttgggtggccataatgggtaggttagtttagttagacataaaa-----  
ggtggctttgcttccaatcaatatgtccctttccaataacgtgataaacagagtgaatatgcttctcgtggtccagttta  
actcacaagat-----

tcaccagaagatctagctttttatatccacaaacttcttgggtgatgctatgcagccaaaacatctatccatttctggt  
gatgatacgcagacagctctgttactgttccctgatgttgctatgcaaccgtctcttttttggctactctca--  
gttggtgccaatgaatcggaaagtcttcttctctatgctcctcatggttgtaagcataccttatgcaggttgtaagtaacctt  
gtggcctctttcgacataatcaattcgactgataatcacgggaacacagcgcgtgcatgtagcggcctaccgagggcacca  
acctgtcgtggaagccttgggttggctgctcctcatcaaccttgtcagttgtcaacaacgcgggtgacacgtttctccact  
cggcagttacaggattcaggaccccaggattccgacggctcgaccggcagttggagctcatgaggtacctcatacgcgag  
agaaccgcgatataccagaagatcatcaacctgagaaacgacgcgggcttacagcccttcacctggctgtgggtggctg  
cgcacaccggatctcgtcgagctactgatggccaccccgctccatcgacctgaacgctgaagacgctaataggcatgaccg

cgctggcgctgctgaagcagcagctgcggttcagcgcagctccgaccggctcatcaagcagatcgtctctgcccggaggggtc  
ttgaaactccagcatcctgagaacccggtcagccatcgcttctcagatcaagatgcagggcgggatcgcgagcagccccgg  
caccactttcaaggtatcggatgcccagatattcctgttctccggcatgggagcggcggagtctctgaggccaagctcct  
gctccagcaacgggaaggatgatgaccctactcacgcagacgcagactgcgcccgagaaccgtggatcgtcg---  
gagaagaggctgagctccgcgagccgggccaagaccgcctcaagatgatgctgagatggcctcgccacaaggacaagac  
gccaagaagtgcagaggacagcagccccgctggggctgatcagcaggctgaacgagcagcggggccgagaccctgctccgc  
tgaggcagaagtttaccagacgacggcgtcaacggcaagcggaccctagcgggtgaagagctccaccccgagctcctca  
tccaccaagaagaagctcaacacgaagctcatccacggcatcatggaggccatgccacagctggcgccatctacggcgcg  
gtccgcgtccccgacggacactttcctgaggtcctcggtatcgtccacgcccagcgcgtggcgaagctgaaggacatct  
gcctcgacgacgagatctccatgggtgacgcccggcggcaggctgaaggatagtgcgacgcccagggaccctcg  
tgctccaacaactcgtccatggacgacggctgtggcgcccgggacggcagagagcgcggcccggaagcaggggtgcccga  
cgggaggctcatcaacatctgctttggcgccagggcctcaccgtggaggactcggcgagcggggcagcagacgagcaaga  
tggtcaagcagcagtgctcagggtgctcctgattgacg-----  
gcgtgggtgctcgcactacaac----  
agcgtgggtgattgggtttgggtgctcgcgctgcagctatgtgtgcttgggttggctttg-----  
ctccttgacagccagcgggtgaactgggtgatccaatgaactt-----

>HP301\_AY106616

-----  
ggcgggagcgtggagatgctcagggagctgctcgaggagtccagcgtgctgcagctatctcgacatccgtggatccaccgt  
gctgcatgccgcccgtgggagagggcagctgcaggtgagccatccacatttgcactgcttgcacacatcttctgcaaa  
tgcttattagctgttcttgctgtaag-----  
-----  
-----

cctggatcattacgcgaatgattcttatgtgcaaatgcagtatcttggcggatccctacagtaatgttatt----  
aaaaaataatataaaaaatacatgggaaagtg-----ggagagatatgagatttaccagtgctc-----  
taaccaaaagtcagcta-----ttgtggctgtgggtttca-----  
-----ttcta-----  
-----  
-----

taacagttgagaagcatctccctcttgaacatgcctttactgtgggatattgtaggtgggacactttcaaatatccaacc  
atctctatatttctagatgcagcgtgccattattattacgacttccatggt-----  
-----gactcttatttaggatgattacgtgcttttcggatcctaatttctcttagttcttcat-----  
--

tcagtttagcaaggatctgcgtacagactacagacgatgcatttcatataaaaactactgtgtgcttgtatcttctcagct  
aggttggatattggaaaggaaattgttccctctagaaagtcacctaagatcacttt-  
gttagttcagcaattccataaagttttttt-

aaagaactgacacaatgctattgataaaggagcatcaacaagttttatagttcaatgtgacagtaatacaacttccagat  
ggcgaatgttccctgagggctcgttcatcttgcaggattagaccaggattcattccaacttaggccttgttgcgttctca  
tcggattgggtgggtcggaaacgattcctgaccggattgtttct-----

ctaatttatataaaactttgatttagctggaaccattccgggtgcaatccgacggaaacgaacaaggccttatcaaaactta  
cataaattagagaaacaatccggccaggaaccgttccaggccttcaatccgtgaaaaagaacaggccctgagtgatttta  
atccctggccctgggttatcgtaatcctgcataacagtatattaagccagggtgtcactgtgtacttgttggccagacttt  
cttatttctatttgggtatgatactgagcatagttatcagctcacacagttgggtggccataatgggtaggttagtttagt  
tagacataaaa-----

gggtggcttgggttccaatcaatatgtccctttccaataacgtgataacagagtgaaatgcttccctgttgggtccagttta  
actcacaagat-----

tcaccagaaagatctagctttttatatccacaaaacttcttgggtgatgctatgcagccaaaacatctatccatttccctggt  
gatgatagcagcagcagctctgttactgttccctgatgttgctatgcaaccgtct--tttttgctactctca--

gttgtgccaatgaatcggaaagtttccctcttctctatgcctcatgttgtaagcataccttatgcaggttgtcaagtacctt  
gtggcctctttcgacataatcaattcgactgataatcacgggaacacagcgtgcatgtagcggcctaccgagggcacca  
acctgtcgtggaagccttgggtgctgctcctcatcaaccttgcagttgtcaacaacgcccgtgacaggttctcact  
cggcagttacaggattcaggaccccaggattccgacggctcgaccgcccagttggagctgatgaggtacctacacgcgag

agaaccgaggatatacagaagatcatcaacctgagaaacgacgcgggccttacagctcttccactggctgtgggtggctg  
cgcacaccggatctcgtcgagctactgatggccaccccgctccatcgacctgaacgctgaagacgctaatggcatgaccg  
cgctggcgctgctgaagcagcagctgcgctcagcgcagctccgaccggctcatcaagcagatcgtctctgcccggaggggtc

ttgaactccagcatcctgagaaccaggtcagccatcgcttctcagatcaagatgcagggcgggatcgcgagcagccccgg  
caccactttcaaggtatcggatgctggagatattcctgttctcgggcatgggagcggcggagtctctgaggccaagctcct  
gctccagcaacgggaaggatgatgaccctactcacgcagacgcagactgcgcccgagaaccgtggatcgtcg---  
gagaagaggctgagctccgcgagccgggccaagaccgcctcaagatgatgctgagatggcctcgccacaaggacaagac  
gccaagaagtcaaggacagcagccccgctggggctgatcagcaggctgaacgagcagcggggccgagaccctgctccgc  
tgaggcagaagtttaccagacgacggcgtcaacggcaagcggaccctagcggatgaagagctccaccccgagctcctca  
tccaccaagaagaagctcaacacgaagctcatccacggcatcatggaggccatgccacagctggcgccatctacggcgcg  
gtccgcgtccccgacggacactttcctgaggtcctcggatcgtccacgcccgcagccgtggcgaagctgaaggacatct  
gcctcgacgacgagatctccatgggtgacgcccggcggcaggctgaaggatagtgacgacgccatggaggaccctcg  
tgctccaacaactcgtccatggacgacggctgtggcgcggggacggcagagagcgcggcccggaaagcaggggtcgggcaa  
cgggaggtcatcaacatctgctttggcgcgagggcctcacctggaggactcggcgcgagcgggcagcagacgagcaaga  
tgttcaagcagcagtgctcagggtgctcctgattgacg-----  
gcgtgggtgctcgcactacaac----  
agcgtgggtgattgggttgggtgctcgcgtgcagctatgtggtgcttgtttgctttg-----  
ctccttgacagccagcggatgaactgggtgatccaatgaactt-----

>Oh43\_AY106616

gcgtgctgcagctatctcgcacatccgtggatccaccgtgctgcatgccgcccgtgggagagggcagctgcaggtgagccat  
ccacatttgctactgcttgcatcacatcttctgcaaatgcttattagctggttcttgctgtaag-----

-----  
-----  
-----  
-----cctggatcattacgcgaatgattcttatgtgcaaatgcagatctctggcggatccctacagtaatggttatt----  
aaaaaaaaatataaaaaaaaaatacatgggaaagtg-----ggagagatagatgatttaccagtgctt-----  
taaccaaaagtcagcta-----ttgtggctgtgggtttca-----  
-----ttcta-----  
-----

taacagttgagaagcatctccctcttgaacatgcctttactgtgggatattgtagggtgggacactttcaaatatccaacc  
atctctatattcttagatgacgctgcccattattattacgacttccatggt-----  
-----gactcttatttaggatgattacgtgcttttccgacccaatttcttctagttcttcat-----  
--

tcagtttagcaaggatctgcgtacagactacagacgatgcatttcattaaaaactactgtggtgcttgtatcttctcagct  
aggttggtattggaaaggaaatggttccctctagaaagtcacctaagatcacttt-  
gtagttcagcaattccataaagtttttttt-

aaagaactgacacaatgctattgataaaggagcatcaacaagttttatagttcaatgtgacagtaatacaacttccagat  
ggcgaatggtccttgagggctcgttcatttgctccaggattagaccaggattcattccaacttaggccttgttcggttctta  
tcggattgggtgggtcggaaacgattcctgacccgattggttct-----

ctaatttataataaactttgattagctggaaccattccgggtgcaatccgacggaaacgaacaaggccttatcaaaactta  
cataaattagagaacaatccggccaggaaccgttccaggccttcaatccgtgaaaaagaacaggccctgagtgatthta  
atccctggccctgggtatcgtaatcctgcataacagtatattaagccaggggtgctcactgtgtacttgttggccagacttt  
cttatttctatttgggtatgatactgagcatagttatcagctcacacagttggtggccataatgggtaggttagtttagt  
tagacataaaa-----

gggtggcttgtttccaatcaatatgtccctttccaataacgtgataacagagtgaaatgcttctctgttgttccagttta  
actcacaagat-----

tcaccagaaagatctagctttttatataccacaaacttcttgggtgatgctatgcagccaaacatctatccatttctgtt  
gatgatacgcagacagctctggttactgttccctgatgttgcctatgcaaccgtct--tttttctactctca--

gttgtgccaatgaatcggaaagtttccctcttctctatgctcatggttgaagcatacctatgcaggttgtcaagtaacctt  
gtggcctcttcgacataatcaattcgactgataatcacgggaacacagcgtgcatgtagcggcctaccgagggcacc  
acctgtcgtggaagccttgggttgcgtctccatcaaccttgtcagttgtcaacaacgcgggtgacacggttctccact  
cggcagttacaggattcaggaccccaggattccgacggctcgcacggcaggctggagctgatgaggtacctcatacgcgag

agaaccgcggatatccagaagatcatcaacctgagaaacgacgcccgttccagctcttccctggctgtgggttggctg  
cgcacaccggatctcgtcagactactgatggccaccctccatcgacctgaacgctgaagacgctaatggcatgaccg  
cgctggcgtgctgaagcagcagctgcgctcagcgcagctccgaccggctcatcaagcagatcgtctctcgcggaggggtc

ttgaactccagcatcctgagaaccgggtcagccatcgcttctcagatcaagatgcagggcgggatcgcgagcagccccgg  
caccactttcaaggtatcggatgctggagatattcctgttctcgggcatgggagcggcggagtctctgaggccaagctcct



gctccagcaacgggaaggatgatgaccctactcacgcagacgcagactgcgcccgagaaccgtggatcgtcg---  
gagaagaggctgagctccgcgagccgggccaagaccgcctcaagatgatgctgagatggcctcgccacaaggacaagac  
gccaagaagttagaggacagcagcccgctggggctgatcagcaggctgaacgagcagcggggccgagaccctgctccgc  
tgaggcagaagttaccaagacgacggcgctcaacggcaagcggaccctagcggggaagagctccaccccgagctcctca  
tccaccaagaagaagctcaacacgaagctcatccacggcatcatggaggccatgccacagctggcgccatctacggcgcg  
gtccgcgctccccgacggacactttcctgaggtcctcgggtatcgtccacgcccgcagccgctggcgaagctgaaggacatct  
gcctcgacgacgagatctccatggtgacgcccgcggcaggctgaaggatagtgacgacgccatggaggaccctcg  
tgctccaacaactcgtccatggacgacggctgtggcgccgggacggcagagagcgcggcccggaagcaggggtgcccga  
cgggaggctcatcaacatctgctttggcgcgaggccctcacctggaggactcggcgagcggggcagcagacgagcaaga  
tgttcaagcagcagtgccctcaggggtcctgattgacg-----  
gcgtggtgtctcgactacaac----  
agcgtggtgtgattgggttgggtgtctcgcgtgcagctatgtgtgcttgtttgctttg-----  
ctccttgacagccagcggggaactgggtgatccaatgaacttgctgc-----

>Jalisco\_Benz 967\_AY106616

-----  
tgagcgtggagatgctcagggagctgctcgaggagtccagcgtgtcgacgtatctcgacatccgtggatccaccgtgct  
gcatgccgcccgtgggagagggcagctgcagggtgagccatccacatttgctactgcttgcatcacatcttctacaaatgc  
ttattagctgttcttctgctgtaag-----  
-----  
-----

cctggatccttacgcgaatgattccttatgtgcaaatgcagatattctg-cggatccctacagtaatgctatt----  
aaaaaagatttaaaaaatacatgggaaagtg-----ggagagatatgagatttaccagtgctc-----  
taaccaaaagtcagcta-----ttgtgg-----  
-----  
-----

-----gtttc-----  
attctataacagttgagaagcatctccctcttgaacatgcctttactgtgggatattgtaggtgggacactttcaaatat  
ccggccatttctatatttctagatgcagcgtgccattattattacgacttccatgct-----  
-----

gactcttatttaggatgattacgtgcttttcggatcctaatttccttctagttcttcatggtgaaatgctcagtttagcaa  
ggatctgcgtacagactacagacgatgcatcttcattgaaaactactgtgtgcttgtatcttctcagctaggttggtagc  
gaa-ggaaattgttctctagaaagtcacctaagatcacttttggtagttcagaaattccataaagttttttttt-  
aaagaacagacacaatgctactgataaaggagcatcaacaagttttatagttcaatgtgacagtaatacaacttccagat  
ggcgaatgttcttggaggccttgttcggttctgctc-----  
-cggatttgtgggtcggaaacgatttctaaccggattgcttct-----  
ctaatttatataaaactttgattagctgaaatgattccgggtgcaatccgacacaaacgaacaaggcctta-----  
-----gtgattt-----  
-----

aagccaggggtgctactgtttacttgggtggccagactttcttatttcatatttgggtatgatactgagcaggttaccagc  
tcacacagtaggtggccataatgggtaggttagtttagtagacataaaa-----  
gggtgcttgggtgccaatcaatatgtccctttccaataacgtgataacagagtgaaatggttacctggtggtccagttta  
actcacaagat-----tcaccagaaagatctagctttt-  
atatccacaaacttcttgggtgatgctatgcagccaaaacatctatccatttctggtgacgatacgcagacagctctggt  
actgctccctgatggtgctatgcaaccgctct--tttttgcctactctca--  
gttgtgccaatgaaatcggaaagtttctcttctctatgctcatggttgtaagcacaacctatgcaggttgtcaagtacctt  
gtggcctcttctgacataatcaattcgactgataatcacgggaacacagcgtgcatgtagcggcctaccgagggcacca  
acctgctcgtggaagccttgggtgctgctgctccatcaaccttgtcagttgtcaacaacgcgggtgacacgcttcttctact  
cggcagttacaggattcaggaccccaggattccgacggctcgaccgaggtggagctgatgaggtacctacacgcgag  
agaaccgcggatataccagaagatcatcaacctgagaaacgacgcgggcttacagctcttccactggctggttggctg  
cgcacaccggatctcgtcgagctactgatggccaccccgctccatcgacctgaacgctgaagacgctaatggcatgaccg  
cgctggcgctgctgaagcagcagctgcttcagcagcgtccgaccggctcatcaagcagatcgtctctgcccggaggggtc  
ttgaactccagcatcctgagaaccgggtcagccatcgcttctcagatcaagatgcagggcggggatcgcgagcagccccgg  
caccactttcaaggtatcggatgcggagatattcctgttctcgggcatgggagcggcggagctctctgaggccaagctcct  
gctccagcaacgggaaggatgatgaccctactcacgcagacgcagactgcgcccgagaaccgtggatcgtcg---  
gagaagaggctgagctccgcgagccgggccaagaccgcctcaagatgatgctgagatggcctcgccacaaggacaagac

gccaagaagt cagaggacaacagcccgtggggcgat cagcaggctgaacgagcacggggctgagaccctgctccgc  
tgaggcagaagttaccaagacgacggcgctcaacggcaagcggaccctagcggggaagagctccaccccgagctcctca  
tccaccaagaagaagctcaacacgaagctcatccacggcatcatggaggccatgccacagctggcgccatctacggcgcg  
gtccgggtccccgacggacactttcctgaggtcctcggtatcgtccacgcccagccgctggcgaagctgaaggacatct  
gcctcgacgacgagatctccatgggtgacgcccgcggcaggctgaaggatagtgacgacgccatggaggaccctcg  
tgctccaacaactcgtccatggacgacggctgtggcgccgggacggcagagagcgccggcgggaagcacgggtgcccga  
cgggaggtcatcaacatctgctttggcgcgaggcctcaccgtggaggactcggcgagcgggacgacgagcaaga  
tgttcaagcagcagtgctcagggtgtcctgattgacg-----  
gcgtgggtgtctcgactacaac----  
agcgtgggtgtgattgggttgggtgtctcgcgtgcagctatgtgtgcttgtttgctttg-----  
ctccttgacagccagcgggtgaactgggtgatccaatgaacttgtgcttgtgtt-----

>Balsas\_USDA PI566686\_AY106616

-----  
agcgtggagatgctcagggagctgctcgaggagtccagcgtgtcgacgtatctcgacatccgtggatccaccgtgctgca  
tgccgcccgtgggagagggcagctgcaggtgagccatccacatttgcactgcttgcacacatcttctacaaatgctta  
ttagctgttcttgcgtgaag-----  
-----  
-----

cctggatccttacgcgaatgattcttatgtgcaaatgcagatattctg-cggatccctacagtaatgctatt----  
aaaaaagatttaaaaaatacatgggaaagtg-----ggagagatatgagatttaccagtgctc-----  
taaccaaaagtcagcta-----ttgtgg-----  
-----  
-----

-----gtttc-----  
attctataacagttgagaagcatctccctcttgaacatgcctttactgtgggatattgtaggtgggacactttcaaatat  
ccggccatttctatatttctagatgcagcgtgccattattattacgacttccatgtt-----  
-----

gactcttatttaggatgattacgtgcttttcggatcctaatttcttctagttcttcatgttgaatgctcagtttagcaa  
ggatctgcgtacagactacagacgatgcatttcattgaaaactactgtgtgcttgtattttctcagctaggttggtagc  
gaa-ggaaattgttctctagaaagtcacctaagatcacttttggtagttcagaaattccataaagttttttt-  
aaagaacagacacaatgctactgataaaggagcatcaacaagttttatagttcaatgtgacagtaatacaacttccagat  
ggcgaatgttcttgaggccttgttcatattgtgc-----  
-cggatttgtgggtcggaaagatttctaaccggattgcttct-----  
ctaatttatataaaactttgattagctgaaatgattccgggtgcaatccgacacaaaacgaacaaggcctta-----  
-----gtgattt--  
-----

aagccaggggtgctactgtttacttgttggccagactttcttatttcttatttgggtatgatactgagcacagttaccagc  
tcacacagtaggtggccataatgggtaggtagtttagttagacataaaa-----  
gggtggcttgggtgccaatcaatatgtccctttccaataacgtgataacagagtgaaatggttacctggttccagttta  
actcacaagat-----

tcaccagaaagatctagctttttatataccacaaacttcttgggtgatgctatgcagccaaaacatctatccatttctggt  
gacgatacgcagacagctctgttactgttccctgatgttgcctatgcaaccgtct--tttttgcactctca--  
gttgtgccaatgaatcggaaagtttctcttctatgcctcatgttgtgaagcataccttatgcaggttgtcaagtaacct  
gtggcctctttcgacataatcaattcgactgataatcacgggaacacagcgtgcatgtagcggcctaccgagggcacca  
acctgtcgtggaagccttgggtgctgcgtctccatcaaccttgtcagttgtcaacaacgcgggtgacagtttctccact  
cggcagttacagattcaggacccaggattccgacggctcgaccggcagttggagctcatgaggtacctcatacgcgag  
agaaccgcggatattcagaagatcatcaacctgagaaacgacgcgggccttacagccctcacctggctgtgggtggctg  
cgcacaccggatctcgtcgagctactgatggccaccctccatcgacctgaacgctgaagacgctaagggcatgaccg  
cgctggcgctgctgaagcagcagctgcgctcagcagcgtccgaccggctcatcaagcagatcgtctctgcccggaggggtc  
ttgaactccagcatcctgagaaccgggtcagccatcgttctcagatcaagatgcagggcgggatcgcgagcagccccgg  
caccactttcaaggtatcggatgcggagatattcctgttctccggcatgggagcggcgaggtctctgaggccaagctcct  
gctccagcaacgggaaggatgatgacctactcacgcagacgcagactgcgcccgagaaccgtggatcgtcg---  
gagaagaggctgagctccgcgagccgggccaagaccgcctcaagatgatgctgagatggcctcgccacaaggacaagac  
gccaagaagt cagaggacagcagcccgtggggcgat cagcaggctgaacgagcacggggccgagaccctgctccgc  
tgaggcagaagttaccaagacgacggcgctcaacggcaagcggaccctagcggggaagagctccaccccgagctcctca

tccaccaagaagaagctcaacacgaagctcatccacggcatcatggaggccatgccacagctggcgccatctacggcgcg  
gtcccgctccccgacggacactttcctgaggtcctcggtatcgtccacgcgcagccgctggcgaagctgaaggacatct  
gcctcgacgacgagatctccatggtgacgcccgcggcaggctgaaggatagtgacgacgccatggaggaccctcg  
tgctccaacaactcgtccatggacgacggctgtggcgccgggacggcagagagcgcggcccggaagcacgggtgcgga  
cgggaggctcatcaacatctgctttggcgcgagggcctcaccgtggaggactcggcgagcgggcagcagacgagcaaga  
tgttcaagcagcagtgctcaggggtgctcctgattgacg-----  
gcgtggtgctcgcactacaac----  
agcgtggtgctgattgggttgggtgctcgcgtgacgctatgtgtgcttgtttgctttg-----  
ctccttgacagccagcgggtgaactggtgatccaatgaacttgtgcttgtgtt-----

>Balsas\_CIMMYT\_11355\_AY106616

-----  
gagcgtggagatgctcagggagctactcgaggagtccagcgtgctcgacgtatctcgacatccgtggatccaccgtgctgc  
atgccgcgctgggagagggcagctgcagggtgagccatccacatttgctactgcttaaatacacatcttctgcaaatgctt  
attagctgttcttctgctgtaag-----  
-----  
-----

-----cctggatccttacgcgaatgattcttacg-----  
-----

-----taaccaagtacgcta-----  
-----

ttgtgg-----  
-----  
-----

--gtttc-----  
-----

attctataacagttgagaagcatctccctcttgaacatgcctttgctgtgggatattgtaggtggggcactttcaaatat  
cgggccatttctatatttctagatgcagcgtgccattattattacgacttccatgtt-----  
-----

gactcttatttaggatgattacgtgcttttcggatcctaatttcttctagttcttcatgttgaatgcgcagtttagcaa  
ggatctgcgtacatactacagacgatgcatttcattgaaaactactgtgtgcttgtattttctcagctaggttggtactg  
gaa-ggaaattgttctctagaaagtacctaagatcacttttggtagttcagaaattccataaagttttttt-  
aaagaacagacacaatgctactgataaaggagcatcaacaagttttatagttcaatgtcacagtaatacaacctccagat  
ggcgaatgttcttgaggggcccgttctgtttttt-----  
-cggaatagaggcatggaacaattcctagccggtttgtttct-----  
ctaatttataatgttttgatcaattggaataattcctggttcatctcggacaaaacgaacaaggcctga-----  
-----

gtgattttaatccctggccctgggtatcgtaatcctgcataacagtatattaagccaggggtgctcactgtgacttgttgg  
ccagactttcttatttctatttattgggtatgatactgagcacagttatcagctcacacagttgggtggccataatgggtagg  
tagtttagttagacataaaaataaaaggtggctttgttgccgatcaatatgtccctttccaataacgtgataacagagtga  
atatgtttcctgttgttccagtttaactcaaaagat-----

tcaccagaaagatctagctttttatattccacaaaacttcttgggtgatgctatgcagccaaaacatctatccatcttctggt  
gatgatacgcagacagctctgttactgttccgtgatggtgctatgcaaccgtct--tttttgctactctca--  
tttgtgccaatgaatcggaaagtttctcttctatgcctcatggttgaagcataccttatgcaggttgtcaagtacctt

gtggcctctttcgacataatcaattcgactgataatcacgggaacacagcgtgcatgtagcggcctaccgagggcacca  
acctgtcgtggaagccttgggtgctgctcctcatcaacctgtcagttgtcaacaacgcgggtgacaggtttcttact  
cggcggttacaggattcaggaccccaggattccgacggctcgaccgcccagttggagctgatgaggtacctatacgcgag  
agaaccgcggatataccagaagatcatcaacctgagaaacgacgcgggcttacagctcttccactggctgtggttggctg  
cgcacaccggatctcgtcgagctactgatggccaccccgctccatcgacctgaacgctgaagacgctaatggcatgaccg  
cgtggcgctgctgaagcagcagctgcgttcagcgcagctccgaccggctcatcaagcagatcgtctctgcccggaggggtc  
ttgaactccagatcctgagaaaccggtcagccatcgcttctcagatcaagatgcagggcgggatcgcgagcagccctgg  
caccacttcaaggtatcggatgcggagatattcctgttctcgggcatgggagcggcggagctctgaggccaagctcct  
gctccagcaacgggaaggatgatgacctactcacgcagacgcagactgcgcccgagaaccgtggatcgtcg---  
gagaagaggtgagctccgcgagcggggccaaagaccgctcaagatgatgctgagatggcctcgccacaaggacaagac

gccaagaagtgcagaggacaacagcccgtggggtcgatcagcaggctgaacgagcagcggggctgagaccctgctccgc  
tgaggcagaagtttaccagaacgacggcgctcaacggcaagcggaccctagcgggtgaagagctccaccccgagctcctca  
tccaccaagaagaagctcaacacgaagctcatccacggcatcatggaggccatgccacagctggcgccatctacggcgcg  
gtccgggtccccgacggacactttcctgaggtcctcggtatcgtccacgcgcagccgctggcgaagctgaaggacatct  
gcctcgacgacgagatctccatggtgacgcccgcggcaggctgaaggatagtgacgacgccatggaggaccctcg

tgctccaacaactcgtccatggacgacggctgtggcgccgggacggcagagagcgcgcccggaagcacgggtgcgggcaa  
cgaggagctcatcaacatctgcttggcgcgaggcctcaccgtggaggactcggcgagcgggcagcagacgagcaaga  
tggtcaagcagcagtgctcagggtgtcctgattgacg-----  
gcgtgggtgtctcgactacaaccaacagcgtgggtgtgattggtttcgtgtctcgcgtgcagc-  
atgtgtgcttgtttgctttg-----  
ctccttgacagccagcgggtgaactgggtgatccaatgaacttgtgcttgtgtt-----

>Balsas\_CIMMYT 8783\_AY106616

-----  
gagcgtggagatgctcagggagctgctcgaggagtccagcgtgtcgacgtatctcgacatccgtggatccaccgtgctgc  
atgccgcccgtgggagagggcagctgcaggtgagccatccacatttgcactgcttaaatacacatcttctgcaaagtctt  
attagctgttcttgcgtgtaag-----  
-----  
-----

cctggatccttacgcgaatgattcctatgtgcaaatgcagatattctg-cggatccctacagtaatgttatt----  
aaaaaataatttaaaaaatacatgggaaagtg-----ggagagatatgagatttaccagtgctc-----  
taaccaaagtcagctaa-----ttgtgg-----  
-----  
-----

-----gtttc-----

attctataacagtcgagaagcatctccctcttgaacatgcctttgctgtgggtattgtaggtgggacactttcaaatat  
ccggccatttctatatttctagatgcagcgtgccattattattacgacttccatgtt-----  
-----

gactcttatttaggacgattacgtgcttttcggatcctaatttccttctagttcttcatgttgaatgcgcagtttagcaa  
ggatctgcgtacatactacagacgatgcatcttctgaaaactactgtgtgcttgtatcttctcagctaggttggtagc  
gaa-ggaaattgttctctagaaagtacctaagatcacttttgttagttcagaaattccataaagtttttttt-  
aaagaacagacacaatgctactgataaaggagcatcaacaagttttatagttcaatgtcacagtaatacaacttccagat  
ggcgaatgttcttgaggggctgttcgttttttc-----  
-cggaatagaggcatggaacaattcctagccgggttcttct-----  
ctaatttataatgttttgatcaattggaataattcctgggtcattcctggacaaacgaacaaggcctga-----  
-----

gtgattttaatccctggccctgggtatcgtaatcctgcataacagtatattaagccaggggtgctcactgtgacttgttgg  
ccagactttcttatttcttatttgggtatgatactgagcacagttatcagctcacacagttgggtggccataatgggtagg  
tagtttagtttagacataaaaataaaagggtggcttgggtgccgatcaatatgtccctttccaataacgtgataacagagtga  
atatgttctctgttgttccagtttaactcaaaagat-----

tcaccagaaagatctagctttttatataccacaaacttcttgggtgatgctatgcagccaaaacatctatccatttctgtt  
gatgatacgcagacagctctgttactgttccgtgatgttgcctatgcaaccgtct--tttttgcactctca--

tttgtgccaatgaatcggaaagtttcttcttctatgcctcatgttgaagcataccttatgcaggttgtcaagtacctt  
gtggcctcttctgacataatcaattcgactgataatcacgggaacacagcgtgcatgtagcggcctaccgagggcacca  
acctgtcgtggaagccttgggtgctgctccatcaaccttgtcagttgtcaacaacgccgggtgacacgttcttctact  
cggcggttacaggattcaggaccccaggattccgacggctcgaccgccagttggagctgatgaggtacctcatacgcgag  
agaaccgcggatataccagaagatcatcaacctgagaaacgacgcgggcttacagctcttccactggctgtggttggctg  
cgcacaccggatctcgtcgagctactgatggccaccctgctccatcgacctgaacgctgaagacgctaatggcatgaccg  
cgctggcgctgctgaagcagcagctgcttcagcagcgtccgaccggctcatcaagcagatcgtctctgcccggaggggtc  
ttgaactccagcatcctgagaaccgggtcagccatcgcttctcagatcaagatgcagggcgggatcgcgagcagccctgg  
caccactttcaaggtatcggatgcggagatattcctgttctcgggcatgggagcggcggagtctctgagccaagctcct  
gctccagcaacgggaaggtgatgacctactcacgcagacgcagactgcgcccagaaaccgtggatcgtcg---

gagaagaggctgagctcgcgagccgggccaagaccgctcaagatgatgctgagatggcctcgccacaaggacaagac  
gccaagaagtgcagaggacaacagccgctggggctgatcagcaggctgaacgagcacgggctgagaccctgctccgc  
tgaggcagaagtttaccagacgacggcgctcaacggcaagcggaccctagcgggtgaagagctccaccccgagctcctca  
tcaccaagaagaagctcaacacgaagctcatccacggcatcatggaggccatgccacagctggcgccatctacggcgcg  
gtccgggtccccgacggacactttcctgaggtcctcgggtatcgtccacgcccagcggctggcgaagctgaaggacatct  
gcctcgacgacgagatctccatgggtgacgcccggcggcagggtgaaggatagtgcgacgacctggaggaccctcg  
tgctccaacaactcgtccatggacgacggctgtggcgccgggacggcagagagcgcgcccggaagcacgggtgcgggcaa  
cgaggagctcatcaacatctgcttggcgcgaggcctcaccgtggaggactcggcgagcgggcagcagacgagcaaga  
tggtcaagcagcagtgctcagggtgtcctgattgacg-----

gcgtggtgtctcgactacaaccaacagcgtggtgtgattgggttctcggtgtctcgcggtgcagc-  
atgtgtgcttggtttgctttg-----  
ctccttgacagccagcgggtgaactggtgatccaatgaacttgtgcttgtggt-----

>Balsas\_INIFAP JSG 374\_AY106616

-----  
tggagcgtggagatgctcagggagctgctcgaggagtcacagcgtgtcgacgtatctcgacatccgtggatccaccgtgct  
gcatgccgccgctgggagagggcagctgcaggtgagccatccacatttgctactgcttaaatcacatcttctgcga----

-----  
-----cac-----  
-----

-----  
-tttc-----attctataacagttgagaagcatctcctcttgaacatgtctttactgtgggatattgtaggtgg-  
acactttcaaatatccagccatttctatatttctagatgcagcgtgccattattattacgacttccatggt-----

-----  
gactcttatttaggatgattacgtgcctttcggatcctaatttcttctagttcttcatggtgaatgctcagtttagcaa  
ggatatgcgtacagactacagacgatgcatttcatgaaaactactgtgtgcttgtatcttctcagctaggttggatg  
gaaaggaaattgttctctagaaagtcacctaagatcacttt-gttagttcagcaattccataaagttttttt-  
aaagaactgacacaatgctactgataaaggagcatcaacaagttttatagttcaatgtgacagtaatacaacttccagat  
ggcgaatgttcttgag-----tgatttt-----

-----  
-----aatcctggcc-----ctggtt-----  
atcg-----taatcc-----tgcatt-----aacagtat-----  
-----att-----

-----  
aagccaggggtgctactgtgacttgttggccagacttcttatttcatatttgggtatgatactgagcaggttatcagc  
tcacacagttggtggccataaatgggtaggtagtttagtttagacataaaaataaaaggtggcttgttgccgatcaatatgt  
ccctttccaataacgtgataacagagtgaaatgcttctggttgggtccagtttaactcacaagat-----  
tcaccagaaagatctagctttttatccacaaaacttcttgggtgatgctatgcagccaaaacatctatccatttctggt  
gatgatacgcagacagctctgttactgttccctgatggtgctatgcaaccgtct--tttttgetactctca--  
gttgtgccaatgaatcggaaagtttcttcttctatgcctcatggttgtaagcataccttatgcaggttgtcaagtacctt  
gtggcctcttctcgacataatcaattcgactgataatcacgggaacacagcgtgcatgtagcggcctaccgagggcacca  
acctgtcgtggaagccttgggtgctgctctccatcaaccttgtcagttgtcaacaacgcgggtgacacgttctccact  
cggcagttacaggattcaggaccccaggattccgacggctcgaccgccagttggagctgatgaggtacctatacgcgag  
agaaccgtggatattcagaagatcatcaacctgagaaacgacgcgggccttacagctcttccctggctgtggttggctg  
cgcacaccggatctcgtcgagctactgatggccaccccgtccatcgacctgaacgctgaagacgctaatggcatgaccg  
cgtggcgtgctgaagcagcagctgcgttcagcgcagctccgaccggctcatcaagcagatcgtctctgccggaggggtc  
ttgaactcc-

gcatectgagaaccgggtcagccatcgttctcagatcaagatgcagggcgggatcgcgagcagccccggcaccacttct  
aaggtatcggatgcggagatattcctgttctccggcatgggagcggcggagctctcagggccaagctcctgctccagcaa  
cgggaaggatgatgaccctactcacgaagcgcagactgcgcccagagaaccgtggatcgtcg---

gagaagaggctgagctccgcgagccgggccaagaccgcctcaagatgatgctgagatggcctcgccacaaggacaagac  
gcccagaagtcagaggacagcagcccgctggggtcgatcagcaggctgaacgagcagggggccgagacccctgctccgc  
tgaggcagaagttaccaagcagcggcgtcaacggcaagcggaccctagcgggtgaagagctccaccccgagctcctca  
tccaccaagaagaagctcaacacgaagctcatccacggcatcatggaggccatgccacagctggcgcctctacggcgcg  
gtccgggtccccgacggacacttctgaggtcctcgggtatcgtccacgcgcgagccgctggcgaagctgaaggacatct  
gcctcgacgacgagatctccatggtgacgcccgcggcaggctgaaggatagtgacgacgcatggaggaccctcg  
tgetccaacaactcgtccatggacgacggctgtggcgcgggacggcagagagcgcggcccggaagcaggggtgcccga  
cgggaggctcatcaacatctgcttggcgcgagggcctcacctggaggactcggcgcgagggcagcagacgagcaaga  
tgttcaagcagcagtgctcagggtgtcctgattgacg-----

gcgtggtgtctcgactacaaccaacagcgtggtgtgattgggttctcggtgtctcgcggtgcagctatgtgtgcttgttggctt  
tg-----ctccttgacagccagcgggtgaactggtgatccaatgaacttgtgcttgtggt-----

>Balsas\_INIFAP JSP y Lo5130\_AY106616

-----  
tcagggagctgctcgaggagtcagcgtgtcgacgtatctcgacatccgtggatccaccgtgctgcatgccgcccgtggg  
agagggcagctgcaggtgagccatccacatttgctactgcttgcacatcttctgcaaatgcttattagctgttcttg  
ctgtaag-----  
-----

-----  
cctggatcattacgcgaatgattcttatgtgcaaatgcagatattctggcggatccctacagtaatgttatt----  
aaaaaataatataaaaaatacatgggaaagtg-----ggagagatatgagatttaccagtgttc-----  
taaccaagtgcagctaa-----ttgtggctgtgg-----  
-----

-----gtttc-----  
attctataacagttgagaagcatctccctcttgaacatgcctttactgtgggatattgttaggtgggacactttcaaatat  
ccaaccatttctatatttctagatgcagcgtgccattattattacgacttccatgtt-----  
-----gactcttatttaggatgattacgtgcttttcggatcctaatttcttctagttcttcat-  
-----

tcagtttagcaaggatctgcgtacagactacagacgatgcatttcattaaaaactactgtgtgcttgtattttctcagct  
aggttggatttggaaggaaattgttctctagaaagtcacctaagatcacttt-  
gttagttcagcaattccataaagtttttttt-  
aaagaactgacacaatgctattgataaaggagcatcaacaagttttatagttcaatgtgacagtaatacaacttccagat  
ggcgaatgttccttgagggctcgttcatttgtccaggatttagaccaggattcattccaacttaggccttgttcgtttcta  
tcggattgggtgggtcggaaacgattcctgaccggattgtttct-----  
ctaatttatataaaactttgattagctggaaccattccgggtgcaatccgacggaaacgaacaaggccttatcaaaactta  
cataaattagagaaacaatccggccaggaaccgttccaggccttcaatccgtgaaaaagaacaggccctgagtgatttta  
atccctggccctgggtatcgtaactcctgcataacagtatattaagccagggtgtcactgtgtacttgttggccagacttt  
cttatttctatttattgggtatgatactgagcatagttatcagctcacacagttgggtggccataatgggttaggtagtttagt  
tagacataaaa-----

ggtggcttggtttccaatcaatatgtccctttccaataacgtgataacagagtgaaatgcttctgttggttccagttta  
actcacaagat-----

tcaccagaaagatctagctttttatataccacaaacttcttgggtgatgctatgcagccaaaacatctatccatttctgtt  
gatgatagcagacagctctgttactgttccctgatgttgctatgcaaccgtct--tttttgcactctca--  
gttgtgccaatgaatcggaaagtcttcttctctatgctcatgttgtaagcataccttatgcaggttgtcaagtacctt  
gtggcctcttctgacataatcaattcgactgataatcacgggaacacagcgtgcatgtagcggcctaccgagggcacca  
acctgtcgtggaagcattgggttgcgtctccatcaaccttgtcagttgtcaacaacgcccgtgacacgttctccact  
cggcagttacaggattcaggaccccaggattccgacggctcgaccgccagttggagctgatgaggtacctcacaacgcgag  
agaaccgtggatataccagaagatcatcaacctgagaaacgacgcgggccttacagctcttccctggctgtgggtggctg  
cgcacaccggatctcgtcgagctactgatggccaccccgctccatcgacctgaacgctgaagacgctaatggcatgaccg  
cgctggcgtgctgaagcagcagctgcgttcagcgcagctccgaccggctcatcaagcagatcgtctctgcccggaggggtc  
ttgaaactccagcatcctaagaaccgggtcagccatcgcttctcagatcaagatgcagggcgggatcgcgagcagcccgg  
caccactttcaaggtatcggatgcggagatattcctgttctcgggcatgggagcggcggagtctctgaggccaagctcct  
gctccagcaacgggaaggatgatgacctactcacgcagacgcagactgcgcccagaaaccgtggatcgtcg---  
gagaagaggctgagctccgcgagccgggccaagaccgctcaagatgatgctgagatggcctcgccacaaggacaagac  
gccaagaagtacagggacagcagccgctggggctgatcagcaggctgaacgagcagcggggccgagaccctgctccgc  
tgaggcagaagttaccaagacgacggcgtcaacggcaagcggaccctagcgggtgaagagctccaccccgagctcctca  
tccaccaagaagaagctcaacacgaagctcatccacggcatcatggaggccatgccacagctggcgccatctacggcgcg  
gtccgggtccccgacggacactttcctgaggtctcgggtatcgtccacgcgcagcggctggcgaagctgaaggacatct  
gctcgacgacgagatctccatgggtgacgcggcggcggcggcggcggcggcggcggcggcggcggcggcggcggcggc  
tgctccaacaactcgtccatggacgacggctgtggcggcgggacggcagagagcgcggccgggaagcaggggtgcccga  
cgggaggctcatcaacatctgctttggcgcgcagggcctcacctggaggactcggcgcagcgggacgacgagcaaga  
tgttcaagcagcagtgctcaggggtgctcctgattgacg-----  
gcgtgggtgctcgcactacaac-----  
agcgtgggtgctgattgggttgggtgctcgcggtgcagctatgtgtgcttggtttggctttg-----  
ctccttgcacagccagcgggtgaactgggtgatccaatgaacttgtgcttgggtt-----

>Balsas\_INIFAP JSG 378\_AY106616

-----  
gagcgtggagatgctcagggagctgctcgaggagtccagcgtgctcgacgtatctcgacatccgtggatccaccgtgctgc  
atgccgccgctgggagagggcagctgcaggtgagccatccacatttgctactgcttgcacacatcttctgcaaatgctt  
attagctgttcttgcgtgtaag-----  
-----  
-----

cctggatccttacgcgaatgattccttatgtgcaaatgcagatattctg-cggatcc-tacagtaatggtatt----  
aaaaaagattaaaaaatacatgggaaagtgagaggggaagggagagatatgagatttaccagtgttcaagttctaacca  
aagt--g-taa-----gtgt----tgaagtgta-----taagtggataa-----  
-----acta-----ccttct--cctatc-agct-----taagcttttg----ggttgaact-ggtagtg-  
cgtccact-----ctaa----taca-----aaatcagctattgtgg-----  
-----gtttc-----

attctgtaacagttgagaagcatctccctcctgaaatgctctttacagtcggatattgttaggtgggacactttcaaatat  
ccagccatttctatatttctagatgcagcgtgccattattattatggcttccatggt-----  
-----

gcctcttatttaggatgattacattatcttgcggatcctgatttctcttagtcttctcatggtgaaatgctcagtttagcaa  
ggatctgcgtacagactacagacgaagcatttcttaaaaaactactgtgtgcttgtattttctcagctaggttgggtattg  
gaaaggaaattgttctctagaaagtcacctaagatcacttt-  
gtagttcagaaatcccataagtttttttaagaactgacacaatgctactgataaaggagcatcaacaagttttat  
agttcaatgtgacagtaatacaacttccagatggcgaatgttcttgag-----tgatttt-----  
-----aatccctggcc-----  
-----ctggtt-----atcg-----taatcc----tgcac-----aacagtat-----  
-----

----att-----

aagccaggggtgctactgtgtacttgttggccagacttcttatttctatttattggatgatactgagcacagctatcagc  
tcacacagttgggtggccataatgggtaggtagtttagttagacataaaa-----  
ggtaggtttgtttccaatcaatatgtccctttccaataacgtgataacagagtgaaatgcttctgctgttccagttta  
actcacaagat-----

tcaccagaagatctagctttttatataccacaaacttcttgggtgatgctatgcagccaaaacatctatccatttctggt  
gatgatagcagacagctctgttactgttccctgatgctgctatgcaaccgtct--  
tttttgctactttcacggttgtgccaatgaatcggaaagtcttcttctctatgcctcatggttgaagcataccttatgc  
aggttgtcaagtaccttgtggcctctttcgacataatcaattcgactgatagtcacgggaacacagcgtgcatgtagcg  
gcctaccgagggcaccaacctgtcgtggaagccttgggtgctgcttccatcaaccttgtcagttgtcaacaacgcggy  
tgacacgtttcttactcggcggttacaggattcaggacccaggattccgacggctcgaccgccagttggagctgatga  
ggtagctgatagcgcgagagaaccgaggatccagaagatcatcaacctgagaaacgacgcgggccttacacctcttcc  
ctggctgtggttggctgctgacacccggatctcgtcgagctactgatggccaccccgctccatcgacctgaacgctgaaga  
cgctaatggcatgaccgcgctggcgtgctgaagcagcagctgcttccagcgcgctccgaccggctcatcaagcagatcg  
tctctgcccggaggggtcttgaactccagcatcctgagaacccggctcagccatcgcttctcagatcaagatgcagggcggg  
atcgcgagcagccccggcaccactttcaaggtatcggatgaggagatattcctgttctccggcatgggagcggcggagtc  
tctgaggccaagctcctgctccagcaacgggaaggatgatgatcctactcacgcagacgcagactgcgccgagaaccggtg  
gatcgtcg---

gagaagagggctgagctccgcgagccgggccaagaccgctcaagatgatgctgagatggcctcgccacaaggacaagac  
gcccaagaagtgcagggacagcagcccgctggggtcgatcagcaggctgaacgagcagcggggccgagaccctgctccgc  
tgaggcagaagttaccaagacgacggcgtcaacggcaagcggaccctagcgggtgaagagctccaccccgagctcctcg  
tccaccaagaagaagctcaacacgaagctcatccacggcatcatggaggccatgccacagctggcgccatctacggcgcg  
gtccgggtccccgacggacactttcctgaggtcctcggtatcgtccacgcgcgagccgctggcgaagctgaaggacatct  
gcctcgacgacagatctccatggtgacgcgcccggcggcaggctgaaggatagtgcgacacccatggaggaccctcg  
tgctccaacaactcgtccatggacgagcgtgtggcgcgggagcggcagagagcgcggccgggaagcaggggtgcggcaa  
cgggaggtcatcaacatctgcttggcgcgagggcctcaccgtggaggactcggcgagcgggctgcagacgagcaaga  
tgttcaagcagcagtgctcagggtgtcctgattgacg-----  
gcgtggtgtctcgactacaaccaacagcgtgggtgtgattggtttcgtgtctcgcgtgcagctatgtgtgcttgtttgctt  
tg-----ctccttgcacagccagcgggtgaactgggtgatccaatgaacttgtgcttgtggt-----

>Tripsacum\_MIA\_34597\_haplotype1\_AY106616  
atgagccgggcccgtccacgcccggcgagagggcgggagcgtggagatgctcagggagctgctcgaggagtccagcgtgct  
gacgtatctcgacatccgtggatccaccgtgctgcatgccgcccgtgggagagggcagctgcaggtgagccatccacatt





-----  
-----  
cctggatccttgcgcgaatgattcttat-----  
-----  
-----  
-----  
-----  
-----

-----  
cagttatatgtatgtgcaaatgcagttattctgtggatcgaggagactcttcttttaggatgattacatgcttttcggattc  
tgatttgcttctagttcttcatgctgaatgctcagtttagctaggatctgcgtacagactacagacgatgcatttcatta  
aaaactactgtttgcttgtatcttctcagctaggtaggtagtgagaaggaaattgttcatctagaaagtgcctaaagata  
acttt-gttaattcagcaattccgtaaagttttttt-

aaagaacggacacaatcttactaataaaggagcaccaacaagttctatagttcaatgtgacagtaataacaactccagat  
ggagaacggttctggaa-----tgtattt-----  
-----aatccctggtt-----att-----  
-----gtaatcc---tgcatt-----aacagtat-----  
-----att-----

-----aagccaggggtgctact-----  
tttttatttcatatattgggtatgatactgagcatagttatcagctcatacagttgggtggccataatgggttaggaagttta  
gttagacataaaa-----

ggtagctttgttcccaatcaacatgtccctttccaataatgtgagaacagagtgaaataacttccctggtggtccagttta  
gctcaaaaaaaaaaaaa--tcaccagaaagatctagctttt-

atatccacaaacttcttgggtgatgctatgcagccaaaacttctatccatttccctggtggtgatacgcagacagctctggt  
actggttctttgatggtgctatgcaaccatcatctttttgctacttcca--

gttgtaccaatgaatcggaaagtttctctttctatgcctcatggttctaatacacaacttatgcaggttgtcaagtaacctt  
ctggcctctttcgacataatcaattcgattgataatcacgggaacacagcgtgcacgtagcggcctatcgagggcacca

acctgcccgtggaagcgttgggtgctgctccatcaaccttgtcagctgtcaacaacgcgggtgacacgttctccact  
cggcagttacaggtatcaggaccccaggggtccgacggctcgaccgccaattggagctgatgagataacctcacaacgcgag

agaacgcgagacatccagaagatcatcaatctgaggaacgacgcaggccttacagccctcacctggcgtggttggctg  
cgcacaccggatcttctgagctactgatggccaccctcgatcgacctgaacgctgaagacgctaagggcatgaccg

cgctggcgtgctgaagcagcagctgcttccggcagatccgaccggctcatcaagcagatagctctgcccggaggggtc  
ttgaactccagcatcctgagaaccgatcagccatcgttctcagatcaagatgcagggcggggatcgcaagcagccctgg

caccactttcaaggtatcggatgcccagatattcttgttctcgggcatgggagcggcggagctctcaggccaagctcgt  
gctccagcaacgggaaggatgatgaccctactcacgcagatggagattgcccggagaaccgaggatcgtcatcagagaag

aggctgagctctgcccagccgggccaagaccgtctcaagatgatgctgaggtggcctcgccacaaggacaagacgccc  
gaagacagaggacagcagcccgtgggggtcgatcagcaagctgggagcagcggggccgagaccccgcctccgctgagggc

agaaatttaccagacgacggcgtcaacggcaagcggaccctagcgggtgaagagctccacccaagctcctcgtccacc  
aagaagaagctcaacacgaagctcatacacggcatcatggaggccatgccgcagctggcggccatctacggcgcgggtccgg

gtccccgacggacaggttctgaggtcctcggatcgtccacgcccagccgctggcgaagctcaaggacatctgccttg  
acgacgagatctccatgggtgatgccgcccgcggcaggctcaaggatagcagcagcgcctatggaggacccctcgtgctcc

agc---  
tcgtccgtggacgacggctgtggcgcgggacggcagagagcgcggcccggaagcacgggtgcccgaacgggaggctcat  
caacatctgcttggcgcgcagggcctcaccgtggaggactcggcagcgggacgagcagcaagatggtcaagcagc

agtgctcagggtgctcctgattgacgcccactccaaccaacagcgtgtattgtatcatac-----  
-----

agcgtggtgattgggttctgatatctcgcgtgcagctatgcgtgcttgtttgcttgggtgtgcatgctccttgcacagcc  
agcggatgaactgggtgatccaatgaactgtgcttgtgtaagt-

>B73\_AY107952

gacactccga-----

ctcactccccctccccgcccccaaccgctcgcaatggccgcccgtctccgcagccccgaggccctcgatgcctccccgact

cgcc---ctccgtgccacctcttctcctccgctctccgctcccaatgcgcgcgctccccttactccgcagc-----  
cgcttccgctccttgaccacggcctacgctgtcaagcaggacacggccctctggaccctgcaccctcctccgcatcag  
tgctgccaccgacgacggctccgctcctcatcgccgtcgacctatctgacgccacggacctcgtggactcgtacacga  
accgggccaataacctcctgatccgcgtaccggcgagga-g--  
ctcaagccggcgtacatgggtcatctcctcgccgcctaaagcggggcccggttcgaattcctcgtcaaaagcgtgccggg  
agctaccgccccggcctctgcgccctccgagacggggatggttgaggactcggcgccgtcacggggaaggggttcccc  
tcgacaggataaatccgcccagcgtcgcgacagcctgctcatcttcgcccggggacggggatcaggtcattctcgtcc  
ctt-  
gtttctctactcaatacatctgtccttatatttactccacataaataaatcatataatctacggacgggtctcttcatatt  
tatttaccgtgctgatgcagcacctcttgatgagccgctgtaattgtgtctggttgtaggaagaatgccatcaaaccttc  
ttttcttcattaatcgtttcaaccagccga---  
agaatggacggtggtttaccatcctagagttgggtatgcttaatacaaaaataagaatggacggtggtttaaccatcctcat  
cctggagcagagctagaattagtttcaaccagccgactagctgagctctggtgctgctggaagcagaagccacatct--  
tgctgtcctcattgccatctgcgccgctgcttctgatgattccatttacttccctgccagagtcactctctccgctcag  
tttctgtgta-----  
atgttgggcactggggtagaagggatgggtcgagcccccttgcaataggggtgctcgtatctggttggttattatca  
tggcctcacgtggttcttatgcatctgctcaaggttgagtagcttggaggctccttggtgcatccatttcacgtagtaa  
taaatcaagaaaaagaaagctttcttaataaaaaatgttttgggggttttaaggctcttctccaaattagcaaactacaagt  
tcttttatgggtgcaaccgcagaggtgagat-----gagacaacacatttgaatcg-  
tggacgtcatacgaataatctccggttactattgctaccgtgcctaacagactaccagagcctcctacaagtagttgc  
tgacaacttt-  
gagtttgacaattgacatgctatcaactacctactgcagcaaaaactatgggtcagggactaggtcatccatagatggaa  
atcataatcctcaagaatactatttccagtttccatctgcattgtggctgactagctaattttgcttctactcttaagttt  
tgggctcctctgatctttcccaattaatctcctgtattttgatgcagtgcatcacttatcgagttcgggtt  
cgctgccaaagaaagagctgatgtgaggtttattatgggtgatacaagtctgaaatctatgtcataaccaggttggagaaa  
tttccccatgtactgtatgcaagctcgtgatttgccggagaagcctttagctcacataaaaagatacataattttctg  
tttggcaggaaggcttagtaactgggagtcactggaatataaataataaccagctcttatcacaaccagatgacagctgg  
aaaggtgaacgaggatagttcaggtatacaagaaatgctccaccattggtttgtcttattg-----  
-----  
agacatccttctaataatgacattaatcttgcaggatgctttcttcagaaacaagaacatagtaaatccatcttctacaggag  
ccatacttctgaggaccgaatgaaatgcaggaggtgctgattgtgtgttcaagactcttttgcataactttactatt  
aagcatgctgagcctatgacaaaaatggttctacttgtgagtcgaactgctactgcatcaaacgtgcatgtaaacac  
ttaagtacta---tatat--  
taaaaatggagacctacatccctaaacttactaactgtagcactcctagatcaaaatagttctaataatgagatctggctcact  
atctatttagcatgctgaaatccctaaacctttctacctctggctctcatgcaactcccttctctgacctgcatcaactaac  
cgcaccaccagcttttttc-----  
gtgtggatgcaatgatgaattgatgatactgatgacgctctctactttacaggaactcaccttatcccttgtagcagatg  
gtgtctcacgagacaaaatctaacgaactactgaaa-----  
-----  
-----

>Mo17\_AY107952

gacactccga-----  
ctcactccccctccccgcaccaaccgctcgcaatggccgcccgtctccgcagccccgaggccctcgatgcctccccgact  
cgcc---ctccgtgccacctcttctcctccgctctccgctcccaatgcgcgcgctccccttactccgcagc-----  
cgcttccgctccttgaccacggcctacgctgtcaagcaggacacggccctctggaccctgcaccctcctccgcatcag  
tgctgccaccgacgacggctccgctcctcatcgccgtcgacctatctgacgccacggacctcgtggactcgtacacga  
accgggccaataacctcctgatccgcgtaccggcgagga-g--  
ctcaagccggcgtacatgggtcatctcctcgccgcctaaagcggggcccggttcgaattcctcgtcaaaagcgtgccggg  
agctaccgccccggcctctgcgccctccgagacggggatggttgaggactcggcgccgtcacggggaaggggttcccc  
tcgacaggataaatccgcccagcgtcgcgacagcctgctcatcttcgcccggggacggggatcaggtcattctcgtcc  
ctt-  
gtttctgtactcaatacatctgtccttatatttactccacataaataaatcatataatctacggacgggtctcttcatatt  
tatttaccgtgctgatgcagcacctcccgatgagccgctgtaattgtgtctggttgtaggaagaatgccatcaaaccttc  
ttttcttcattaatcgtttcaaccagccga---  
agaatggacggtggtttaccatcctagagttgggtatgcttaatacaaaaataagaatggacggtggtttaaccatcctcat  
cctggagcagagctagaattagtttcaaccagccgactagctgagctctggtgctgatggaagcagaagccacatct--



tttgacaggaaaggcttagtaactgggagtcactggaattaaaataataaccagtcctatcacaaccagatgacagctgg  
aaaggatgaacgaggatagttcaggtatacaagaaatgctccaccattggtttgtcttattg-----  
-----  
agacatccttctaataatgacattaatcttgcaggatgctttcttcagaaacaagaacatagtaaatccatcttctacaggag  
ccatactttgtggaccgaatgaaatgcaggaggtgtgcattggtgtgtttcaagactctttttgcataactttactatt  
aagcatgctgagcctatgacaaaaattggttgcacttgtgagtcgaactgctactgcatcaaactgtgcatgtaaacac  
ttaagtacta---tatat--  
ttaaaatggagacctacatccctaaacttactaactgtagcatcctagatcaaaatagtcctaatgagatctggctcatc  
atctatcttagcatgctgaatcctaaaacctttctacctctggctctcatgactcccttctctgacctgcatcaactaac  
cgcaccaccagcttttttc-----  
gtgtggatgcaatgatgaattgatgatactgatgacgctctctactttacaggaactcaccttatcccttgta-----  
-----  
-----

>IL14H\_AY107952

gacactccga-----  
ctcactccccctccccgcccccaaccgctcgcaatggcgcgcgtctccgcagccccgaggccctcgatgctccccgact  
cgcc---ctccgtgccacctcttctcctccgcctctccgctcccaatgcgcgcgctccccctactccgcagc-----  
cgcttccgctccttgaccacggcctacgctgtcaagcaggacacggccctctggaccctgacccgctctccgcatcag  
tgctgccaccgacgacggctccgctcctcatcgccgtcgacctatctgacgccacggacctcgtggactcgtacacga  
accgggccaatacctcctgatccgcgtaccggcgagga-g--  
ctcaagccggcgtacatggctcatctctcgcgcgctaaagcggggcccggttcgaattcctcgtcaaaagcgtgcccggg  
agctaccgccccgggctctgccccctccgagacggggatggtgtggagctcggcgcgctcacggggaaggggttcccc  
tcgacaggataaatccgccccgacgtcgcgcgacaccgtgctcatctcgcggcggggacggggatcaggtcattctcgtcc  
ctt-  
gtttctctactcaatacatctgtccttatatttactccacataaataaatcatataatctacggacgggtctcttcatatt  
tatttaccgtgctgatgcagcactccccgatgagccgctgtaattgtgtctgtttgttaggaagaatgccatcaaaccttc  
ttttcttcattaatcgtttcaaccagccga---agaatggacgctggtttaccatcctagagt-  
ggatgcttaatacaaaaataagaatggacgctggttaacctcctcatcctggagcagagctagaattagtttcaacca  
gcccagctagctgagctctgttgcctgagtggaagcagaagccacatct--  
tgctgttctcattggccatctgccccgctgcttctgatgattccatttacttctgccc-  
agagtcactctctcccgtcagtttctgtgta-----  
atgtgtggccactggggtagaagggatggctcgcagcccccttcccaataggggtgctcctgatatctgttgtgggttattatca  
tggactcacgtgttcttatgcatctgctcaaggttgagatggtttgaggtctccttgtgtgcatccatttcacgtagtaa  
taaatcaagaaaaagaaagctttcttaataaaaaatggttttggggctttaaggctcttctccaaattagcaaaactacaagt  
tcttttatgggtgcaaccacagaggtgagat-----gagacaacacatttgaatcg-  
tggacatcatacgaatataatttccggttactattgctaccgtgcttaacagactaccagagcctcctacaagtagttgc  
tgacaacttt-  
gagtttgacaattgacatgctatcaactacctactgcagcaaaaactatgggtcagggactaggtcatccatagatggaa  
atcataatcctcaagaatactatctcagtttccatctgcattgtggctgactagctaattttgcttctactcttaagttt  
tgggctcctctgatctttcccaaatataatctcctgtatttttatgcatgagattcgatcacttattgagttcgggtt  
cgctgccaaaagaaagagctgatgtgaggtttattatgggtgatacaagtctgaaatctatgtcataaccaggttggagaaa  
tttccccatgtactgtatgcaagctcgtgtatgtgcccagagaagcctttagctcacatacaaaagatacataatcttctg  
tttgacaggaaaggcttagtaactgggagtcactggaattaaaataataaccagtcctatcacaaccagatgacagctgg  
aaaggatgaacgaggatagttcaggtatacaagaaatgctccaccattggtttgtcttattg-----  
-----  
agacatccttctaataatgacattaatcttgcaggatgctttcttcagaaacaagaacatagtaaatccatcttctacaggag  
ccatactttgtggaccgaatgaaatgcaggaggtgtgcattggtgtgtttcaagactctttttgcataactttactatt  
aagcatgctgagcctatgacaaaaattggttgcacttgtgagtcgaactgctactgcatcaaactgtgcatgtaaacac  
ttaagtacta---tatat--  
ttaaaatggagacctacatccctaaacttactaactgtagcatcctagatcaaaatagtcctaatgagatctggctcatc  
atctatcttagcatgctgaatcctaaaacctttctacctctggctctcatgactcccttctctgacctgcatcaactaac  
cgcaccaccagcttttttc-----  
gtgtggatgcaatgatgaattgatgatactgatgacgctctctactttacaggaactcaccttatcccttgtagcagatg  
gtgtctcacgagacaaaatcttaacgaactactgaaa-----  
-----

>Oh43\_AY107952

-acactccga-----

ctcactccccctccccgcccccaaccgctcgcaatggccgcccgtctccgcagccccgaggccctcgatgcctccccgact  
cgcc---ctccgtgccacactcttctcctccgcctctccgctcccaatgcccgcgctcccccttactccgcagc-----  
cgcttccgctccttgaccacggcctacgctgtcaagcaggacacggccctctggaccctcgacccgctctccgccatcag  
tgctgccaccgacgacggctccgctcctcatcgccgctcgacctatctgacgccacggacctcgtggactcgtacacga  
accggggccaatacctcctgatccgcgtaccgggagagga-g--

ctcaagccggcgtacatgggtcatctctcgcgcgctaaagcgggggccccgggttcgaattcctcgtcaaaagcgtgccggg  
agctaccgccccgggctctgcccctccgagacggggatgttgtggagctcggcgcgctcacggggaaggggttcccc  
tcgacaggataaatccgcccagcgtcgcgcagaccgtgctcatctcgcggcggggacggggatcaggtcattctcgtcc  
ctt-

gtttcttactcaatacatctgtccttatatttactccacataaataaatcatataatctacggacgggtctcttcatatt  
tatttaccgtgctgatgcagcacctcccgatgagccgctgtaattgtgtctgtttgttaggaagaatgccatcaaaccttc  
ttttcttcattaatcgtttcaaccagccga---agaatggacggtgttttaccatcctagagt-

ggatgcttaatacaaaaataagaatggacggtgtttaaaccatcctcatcctggagcagagctagaattagtttcaacca  
gccgactagctgagctctgttgctgatgtgaagcagaagccacatct--

tgctgttctcattgccatctgcccgtgcttctgatgattccatttacttctcgtcc-

agagtcactctctccgctcagtttctgtgta-----

atgtgtggccactggggtagaagggatgggtcgcagcccccttccaataggggtgtctcgtatctgttgtgggtattatca  
tggactcacgtgttcttatgcatctgctcaaggttgagatgtttgaggtctccttgtgtgcatccatttcacgtagtaa  
taaatcaagaaaaagaaagctttcttaataaaaaatgttttggggctttaaggtcttctccaaattagcaaaactacaagt  
tcttttatgggtgcaaccacagaggtgagat-----gagacaacacatttgaatcg-

tggacatcatacgaataatctccggttactattgctaccgtgcctaacagactaccagagcctcctacaagtagttgc  
tgacaacttt-

gagtttgacaattgacatgctatcaactacctaactgacgcaacaaactatgggtcagggactaggtcatccatagatggaa  
atcataatcctcaagaataactatttcagtttccatctgcatgtgtggctgactagctaattttgcttctactcttaagttt  
tgggctcctctgatctttcccaaatcaatcctctgtattttttatgacgtgcgattcgcacttattgagttcgggtt  
cgctgccaaagaagagctgatgtgaggctttattatgggtgatacaagctgaaatctatgtcataccaggttggagaaa  
tttcccctatgtactgtatgcaagtcggtgtatttgccagagaagcctttagctcacataacaaagatacataatttctg  
tttgacaggaaggttagtaactgggagtcactggaatataataataaccagctcttatcacaaccagatgacagctgg  
aaaggtgaacgaggatattgttcaggttaatacaagaaatgctccaccattgttttgtcttattg-----

agacatccttctaatacattaatcttgcaggatgctttcttcagaaacaagaacatagtaaatccatcttctacaggag  
ccatactttgtggaccgaatgaaatgcaggaggtgtgcatgtgtgtttcaagactctttttgcataactttactatt  
aagcatgctgagcctatgacaaaaatgtttgctacttgtgagtcgaactgctactgcatcaaactgtgcatgtaaacac  
ttaagtacta---tatat--

ttaaaatggagacctacatccctaaacttactaactgtagcatcctagatcaaaattagtctaattgagatctgggtcatc  
atctattttagcatgctgaatcctaaaacctttctacctctggctctcatgcactcccttctctgacctgcatcaactaac  
cgcaccaccagcttttttc-----

gtgtggatgcaatgatgaattgatgatactgatgacgctctctactttacaggaactcaccttatccctttagcagatg  
gtgtctcacgagacaaaatcttaacgaactactgaaa-----

>CML322\_AY107952

gacactccga-----

ctcactccccctccccgcccccaaccgctcgcaatggccgcccgtctccgcagccccgaggccctcgatgcctccccgact  
cgcc---ctccgtgccacactcttctcctccgcctctccgctcccaatgcccgcgctcccccttactccgcagc-----  
cgcttccgctccttgaccacggcctacgctgtcaagcaggacacggccctctggaccctcgacccgctctccgccatcag  
tgctgccaccgacgacggctccgctcctcatcgccgctcgacctatctgacgccacggacctcgtggactcgtacacga  
accggggccaatacctcctgatccgcgtaccgggagagga-g--

ctcaagccggcgtacatgggtcatctcctcgcgcgctaaagcgggggccccgggttcgaattcctcgtcaaaagcgtgccggg  
agctaccgccccgggctctgcccctccgagacggggatgttgtggagctcggcgcgctcacggggaaggggttcccc  
tcgacaggataaatccgcccagcgtcgcgcagaccgtgctcatctcgcggcggggacggggatcaggtcattctcgtcc  
ctt-

gtttctctactcaatacatctgtccttatatttactccacataaataaatcatataatctacggacgggtctcttcatatt  
tatttaccgtgctgatgcagcacctcccgatgagccgctgtaattgtgtctgtttgttaggaagaatgccatcaaaccttc  
ttttcttcattaatcgtttcaaccagccga---  
agaatggacggttgtttgaccatcctagagttggatgcttaatacaaaaataagaatggacggttgtttaaccatcctcat  
cctggagcagagctagaattagtttcaaccagccgactagctgagctctggtgctgctggaagcagaagccacatctct  
tgctgttccctcattgccatctgcgccgctgcttctgatgattccatttacttccctgcc-  
agagtcactctctcccgtcagtttctgtgta-----  
atgtgtggccactggggtagaagggatggtcgcagcccccttccaataggggtgctcgtatctggtgtgggtattatca  
tggcctcacgtgttcttatgcatctgctcaaggttgagtacgtttgaggtctccttgtgtgcatccatttgacgtagtaa  
taaatcaagaaaaagaaagctttcttaataaaaaatgttttggggctttaaggtcttctccaaattagcaaactacaagt  
tcttttatgggtgcaaccgcagaggtgagat-----gagacatcacatttgaatcg-  
tggacatcatacgaataatcttctggttactgttgctaccgtgcctaacagactaccagagcctcctacaagtagttgc  
tgacaacttt-  
gagtttgacaattgacatgctatcagctacactgcaacaaaactatgggtcagggactaggtcatccatagatggaa  
atcataatcctcaagaataactatttcagtttccatctgcattgtggctgactagctaattttgcttctactcttaagttt  
tgggctcctctgatctttcccaaatatctcctgtatttttgatgcagtgcgattcgatcacttatcgagttcggttt  
cgctgccaaagaaagagctgatgtgaggctttattatggtgatacaagctgaaatctatgtcataaccaggttggagaaa  
tttccctatgtactgtatgcaagctcgtgtatttgccggagaagcctttagctcacatacaaaagatacataattttctg  
tttggcaggaaaggttagtaactgggagtcactggaatataaataataaccagctcttatcacaaccagatgacagctgg  
aaaggtgaacgaggatattgttcaggtatacaagaaatgctccaccattgttttgtcttattg-----  
-----  
agacatccttctaatacattaatcttgcaggatgctttctcagaaacaagaacatagtaaatccatcttctacaggag  
ccatactttgtggaccgaatgaaatgcaggaggtgtgcattgttgttgtttcaagactctttttgcataactttactatt  
aagcatgctgagcctatgacaaaaattgtttgctacttgtgagtcgaactgctactgcatcaaactgtgcatgtaaacac  
ttaagtacta---tatat--  
taaaaatggagacctacatccctaaacttactaactgtagcatcctagatcaaaatagctaatgagatctggctcatc  
atctattagcatgctgaatcctaaaacctttctacctctggctctcatgcactcccttctctgacctgcatcaactaac  
cgcaccaccagcttttttc-----  
gtgtggatgcaatgatgaattgatgatactgatgcgctctctactttacaggaactcaccttatcccttgtagcagatg  
gtgtctcacgagacaaaatcttaacgaactactgaaa-----  
-----  
-----

>M37W\_AY107952

gacactccga-----  
ctcactccccctccccgcaccaaccgctcgcaatggccgcccgtctccgcagccccgagggccctcgatgcctccccgact  
cgcc---ctccgtgccacacctcttctcctccgctctccgctcccaatgcgcgcgctccccttactccgcagc-----  
cgcttccgctccttgaccacggcctacgctgtcaagcaggacacggccctctggacccttgcaccctctccgcatcag  
tgctgccaccgacgacggctccgtctcctcatcgccgtcgacctatctgacgccacggacctcgtggactcgtacacga  
accggggcaataacctcctgatccgcgtaccggcgagga-g--  
ctcaagccggcgtacatgggtcatctcttccgcccctaaagcggggccccgggttcgaattcctcgtcaaaagcgtgccggg  
agctaccgccccgggctctgcgccctccgagacggggatgttgtggagctcggcggcgtcacggggaaggggttcccc  
tcgacaggataaaatccgcccagctcgcgcagaccgtgctcatcttccgcccgggggacggggatcaggtcattctcgtcc  
ctt-  
gtttctctactcaatacatctgtccttatatttactccacataaataaatcatataatctacggacgggtctcttcatatt  
tatttaccgtgctgatgcagcacctcccgatgagccgctgtaattgtgtctgtttgttaggaagaatgccatcaaaccttc  
ttttcttcattaatcgtttcaaccagccga---agaatggacggttgttttaccatcctagagt-  
ggatgcttaatacaaaaataagaatggacggttgtttaaccatcctcatcctggagcagagctagaattagtttcaacca  
gccgactagctgagctctgttgctgatgtggaagcagaagccacatct--  
tgctgttccctcattgccatctgcgccgctgcttctgatgattccatttacttccctgcc-  
agagtcactctctcccgtcagtttctgtgta-----  
atgtgtggccactggggtagaagggatggtcgcagcccccttccaataggggtgctcgtatctggtgtgggtattatca  
tggactcacgtgttcttatgcatctgctcaaggttgagtatgtttgaggtctccttgtgtgcatccatttcacgtagtaa  
taaatcaagaaaaagaaagctttcttaataaaaaatgttttggggctttaaggtcttctccaaattagcaaactacaagt  
tcttttatgggtgcaaccacagaggtgagat-----gagacaacacatttgaatcg-  
tggacatcatacgaataatcttccgggttactattgctaccgtgcctaacagactaccagagcctcctacaagtagttgc  
tgacaacttt-

gagtttgacaattgacatgctatcaactacctactgcagcaacaaactatgggtcagggactaggtcatccatagatggaa  
atcataatcctcaagaataactatctcagtttccatctgcattgtggctgactagctaattttgcttctactcttaagttt  
tgggcctcctctgatctttcccaaattaatctcctgtatTTTTTatgcagtgcgattcgatcacttattgagttcggttt  
cgctgccaaagaaagagctgatgtgaggctttattatggtgatacaagtctgaaatctatgtcataaccaggttggagaaa  
tttcccctatgtactgtatgcaagtcgtgtatTTTgccagagaagcctttagctcacataacaaagatacataatTTTctg  
tttgacagggaaaggcttagtaactgggagtcaactggaatTaaataataaccagcttatcacaaccagatgacagctgg  
aaaggtgaacgaggatattgttcaggttaatacaagaaatgctccaccattgttttgtcttattg-----  
-----

agacatccttctaatacattaatcttgcaggatgctttcttcagaaacaagaacatagtaaattccatcttctacaggag  
ccatactttgtggaccgaatgaaatgcaggaggtgtgcatgtgtgtgtttcaagactctttttgcataactttactatt  
aagcatgctgagcctatgacaaaaatgttttgcacttgtgagtcgaactgctactgcatcaaactgtgcatgtaaacac  
ttaagtacta---tatat--  
tTaaatggagacctacatccctaaacttactaactgtagcatcctagatcaaaattagtctaatacagatctggctcatc  
atctatttagcatgctgaatcctaaacctttctacctctggctctcatgcactcccttctctgacctgcatcaactaac  
cgcaccaccagctTTTTTc-----  
gtgtggatgcaatgatgaattgatgatactgatgacgctctctactttacaggaactcaccttatcccttgtagcagatg  
gtgtctcacgagacaaaaatcttaacgaactactgaaa-----  
-----  
-----

>KUI11\_AY107952

gacactccga-----  
ctcactccccctccccgcaccaaccgctcgcaatggcgcgcgctctccgcagccccgaggccctcgatgcctccccgact  
cgcc---ctcctgcccacctcttctcctccgcctctccgctcccaatgcgcgcgctccccctactccgcagc-----  
cgcttccgctccttgaccacggcctacgctgtcaagcaggacacggccctctggaccctcgacccctgacccctctccgcatcag  
tgctgccaccgacgacggctccgctctccctcatcgccgctcgacctatctgacgccacggacctcgtggactcgtacacga  
accgggccaatacctcctgatccgcgtaaccggcgagga-g--  
ctcaagccggcgtacatggctcatctcctcgccgcctaaagcggggccccgggttcgaattcctcgtcaaaagcgtgcccggg  
agctaccgccccgggctctgcgcctccgagacggggatgtgtggagctcggcgcctcagggggaaggggttcccc  
tcgacaggataaatccgcccagcgtcgccgagaccgctgctcatcttcgcccgggggacggggatcaggtcattctcgtcc  
ctt-  
gtttctctactcaatacatctgtccttatatttactccacataaataaatcatataatctacggacgggtctcttcatatt  
tatttaccgtgctgatgcagcacctcttgatgagccgctgtaattgtgtctgTTTTgttaggaagaatgccatcaaaccttc  
TTTTcttcaatacgtttcaaccagccga---  
agaatggacggttgttttaccatcctagagttggatgcttaatacaacaaataagaatggacggttgtttaaccatcctcat  
cctggagcagagctagaattagtttcaaccagccgactagctgagctctggtgctgctggaagcagaagccacatct--  
tgctgttctcattgccatctgcgcgctgcttctgatgattccatttacttctgcccagagtcactctctccgctcag  
tttctgtgta-----  
atTTgtggccactggggtagaagggatgggtcgcagcccccttgcaataggggtgtctcgtatctgttgtgggtatttatca  
tggcctcacgtgttcttatgcatctgctcaaggttgagtacgtttgaggtctccttgtgtgcatccatTTcacgtagtaa  
TaaatcaagaaaaagaaagctttcttaataaaaaatgtTTTTggggTTTTaaggtcttctccaaattagcaaaactacaagt  
tcttttatggttgcaaccgagaggtgagat-----gagacaacacatttgaatcg-  
TggagtcatacgaatTaaatTTccggttactattgctaccgctgcttaacagactaccagagcctcctacaagtagttgc  
tgacaacttt-  
gagtttgacaattgacatgctatcaactacctactgcagcaacaaactatgggtcagggactaggtcatccatagatggaa  
atcataatcctcaagaataactatctcagtttccatctgcattgtggctgactagctaattttgcttctactcttaagttt  
tgggcctcctctgatctttcccaaattaatctcctgtatTTTTTatgcagtgcgattcgatcacttatcgagttcggttt  
cgctgccaaagaaagagctgatgtgaggctttattatggtgatacaagtctgaaatctatgtcataaccaggttggagaaa  
tttcccctatgtactgtatgcaagtcgtgtatTTTgcccggagaagcctttagctcacataacaaagatacataatTTTctg  
tttggcagggaaaggcttagtaactgggagtcaactggaatTaaataataaccagcttatcacaaccagatgacagctgg  
aaaggtgaacgaggatattgttcaggttaatacaagaaatgctccaccattgttttgtcttattg-----  
-----

agacatccttctaatacattaatcttgcaggatgctttcttcagaaacaagaacatagtaaattccatcttctacaggag  
ccatactttgtggaccgaatgaaatgcaggaggtgtgcatgtgtgtgtttcaagactctttttgcataactttactatt  
aagcatgctgagcctatgacaaaaatgttttgcacttgtgagtcgaactgctactgcatcaaactgtgcatgtaaacac  
ttaagtacta---tatat--  
tTaaatggagacctacatccctaaacttactaactgtagcatcctagatcaaaattagtctaatacagatctggctcatc

atctatatttagcatgctgaatcctaaaacctttctacctctggctctcatgcactcccttctctgacctgcatcaactaac  
cgcaccaccagcttttttc-----  
gtgtggatgcaatgatgaattgatgatactgatgacgctctctactttacaggaactcaccttatcccttgttagcagatg  
gtgtctcacgagacaaaatctaacgaactactgaaa-----  
-----  
-----

>CML69\_AY107952

gacactccga-----  
ctcactccccctccccgcccccaaccgctcgcaatggcgcgcgctctccgcagccccgaggccctcgatgcctccccgact  
cgcc---ctccgtgccacactcttctcctccgctctccgctcccaatgcgcgcgctccccctactccgcagc-----  
cgcttccgctccttgaccacggcctacgctgtcaagcaggacacggccctctggaccctgaccccgctctccgcatcag  
tgctgccaccgacgacggctccgctcctcctcatcgccgctcgacctatctgacgccacggacctcgtggactcgtacacga  
accggggccaatacctcctgatccgcgtaccggcgagga-g--  
ctcaagccggcgtacatgggtcatctcctcgccgcctaaagcggggccccgggttcgaattcctcgtcaaaagcgtgccggg  
agctaccgccccggcctctgcgccctccgagacggggatgttgtggagctcggcgcgctcacggggaaggggttcccc  
tcgacaggataaaatccgcccagcgtcgcgcagaccgctgctcatctcgcggcggggacggggatcaggtcattctcgtcc  
ctt-  
gtttctctactcaatacatctgtccttatatttactccacataaataaatacatataatctacggacgggtctcttcatatt  
tatttaccgtgctgatgcagcacctcttgatgagccgctgtaattgtgtctggtttaggaagaatgccatcaaaccttc  
ttttcttcattaatcgtttcaaccagccga---  
agaatggacggttgttttaccatcctagagttgggtatgcttaatcaacaaataagaatggacggttgtttaaccatcctcat  
cctggagcagagctagaattagtttcaaccagccgactagctgagctctggtgctgctgtgaagcagaagccacatct--  
tgctgttccctcattgccatctgcgcgcgctgcttctgatgattccatttacttccctgccagagtcactctctccgctcag  
tttctgtgta-----  
atgtgtggccactggggtagaaggatgggtcgcagcccccttgcaatagggtgctcctgatatctgttgtgggtattatca  
tggcctcacggttcttatgcatctgctcaagggttgagtagcttggaggtctccttgtgtgcatccatttcacgtagtaa  
taaatcaagaaaaaagaagctttcttaataaaaaatgttttgggggttttaaggctctctccaaattagcaaaactacaagt  
tcttttatgggtgcaaccgcagaggtgagat-----gagacaacacatttgaatcg-  
tggacgtcatacgaatataatctccggttactattgctaccgctgcctaacagactaccagagcctcctacaagtagttgc  
tgacaacttt-  
gagtttgacaattgacatgctatcaactacactgacgcaacaaactatgggtcagggactaggtcatccatagatggaa  
atcataatcctcaagaataactatttcagtttccatctgcattgtggctgactagctaattttgcttctactcttaagttt  
tgggctcctctgatctttcccaattaatctcctgtatttttgatgacgtgcatcacttatcgagttcggttt  
cgctgccaaagaaagagctgatgtgaggctttattatgggtgatacaagctctgaaatctatgtcataccaggttggagaaa  
tttccctatgtactgtatgcaagctcgtgtatttgccggagaagcctttagctcacataacaaagatacataattttctg  
tttggcaggaaggcttagtaactgggagctcaactggaatataaataataaccagctcttatcacaaccagatgacagctgg  
aaagggtgaacgaggatattgttcaggtaatacaagaaatgctccaccattgttttgtcttattg-----  
-----  
agacatccttctaataatgacattaatcttgcaggatgctttcttcagaaacaagaacatagtaaatccatcttctacaggag  
ccatactttgtggaccgaatgaaatgcaggaggtgtgcattgttgttgtttcaagactctttttgcataactttactatt  
aagcatgctgagcctatgacaaaaattgtttgctacttgtgagtcgaactgctactgcatcaaactgtgcatgtaaacac  
ttaagtacta---tatat--  
taaaaatggagacctacatccctaaacttactaactgtagcatcctagatcaaaatagctaatgagatctggctcatc  
atctatatttagcatgctgaatcctaaaacctttctacctctggctctcatgcactcccttctctgacctgcatcaactaac  
cgcaccaccagcttttttc-----  
gtgtggatgcaatgatgaattgatgatactgatgacgctctctactttacaggaactcaccttatcccttgttagcagatg  
gtgtctcacgagacaaaatctaacgaactactgaaa-----  
-----  
-----

>KUI3\_AY107952

-acactccga-----  
ctcactccccctccccgcccccaaccgctcgcaatggcgcgcgctctccgcagccccgaggccctcgatgcctccccgact  
cgcc---ctccgtgccacactcttctcctccgctctccgctcccaatgcgcgcgctccccctactccgcagc-----  
cgcttccgctccttgaccacggcctacgctgtcaagcaggacacggccctctggaccctgaccccgctctccgcatcag  
tgctgccaccgacgacggctccgctcctcctcatcgccgctcgacctatctgacgccacggacctcgtggactcgtacacga



acccgggccaatacctcctgatccgcgtacccggcgagga-g--  
ctcaagccggcggtacatgggtcatctcctcgccgcctaaagcggggccccgggttcgaattcctcgtcaaaagcgtgccggg  
agctaccgccccgggctctgcgccctccgagacggggatggtgtggagctcggcgccgtcacggggaaggggttcccc  
tcgacaggataaatccgcccagcgtcgcgcagaccgtgctcatcttcgccccggggacggggatcaggtcattctcgtcc  
ctt-  
gtttctctactcaatacatctgtccttatatttactccacataaaataaatcatataatctacggacgggtctcttcatatt  
tatttaccgtgctgatgcagcacctcttgatgagccgctgtaattgtgtctggtttgtaggaagaatgccatcaaacccttc  
ttttcttcattaatcgtttcaaccagccga---  
agaatggacggttggtttaccatcctagagttgggtatgcttaatacaaaaataagaatggacggttggttaaccatcctcat  
cctggagcagagctagaattagtttcaaccagccgactagctgagctctggtgctgctgtgaagcagaagccacatct--  
tgctgttctcattgcccactctgcgccgctgcttctgatgattccatttacttctgcccagagtcactctctcccgtcag  
ttctgtgta-----  
atltgtggccactggggtagaagggatgggtcgcagcccccttgcaataggggtgtctcgtatctggtgtgggtattatca  
tggcctcacgtgttcttatgcatctgctcaagggttgagtacggttgagggtctccttggtgcatccatttcacgtagtaa  
taaatcaagaaaaagaaagctttcttaataaaaaatgttttgggggttttaagggtcttctccaaattagcaaaactacaagt  
tcttttatggttgcaaccgcagaggtgagat-----gagacaacacatttgaatcg-  
tggacgtcatacgaatlaatttccggttactattgctaccgtgcctaacagactaccagagcctcctacaagtagttgc  
tgacaacttt-  
gagtttgacaattgacatgctatcaactacctactgcagcaaaaactatgggtcagggactaggtcatccatagatggaa  
atcataatcctcaagaataactatttcagtttccatctgcatgtgtggctgactagctaattttgcttctactcttaagttt  
tgggcctcctctgatctttccaaattaatctcctgtattttgatgcagtgcatccgatcacttatcgagttcgggtt  
cgctgccaaagaaagagctgatgtgaggctttatattgggtgatacaagctctgaaatctatgtcataaccaggttggagaaa  
tttcccctatgtactgtatgcaagtcgtgtatttgcccggagaagcctttagctcacataaaaagatacataattttctg  
tttggcaggaaggcttagtaactgggagtcactggaatlaaaaaataaccagctcttatcacaaccagatgcagctgg  
aaagggtgaacgaggatattgttcaggtaatacaagaaatgctccaccattgttttgtcttattg-----  
-----  
agacatccttctaatacattaatcttgcaggatgctttcttcagaaacaagaacatagtaaatccatcttctacaggag  
ccatactttgtggaccgaatgaaatgcaggaggtgtgcatgtgtgtgtttcaagactctttttgcataactttactatt  
aagcatgctgagcctatgacaaaaatgtttgctactgtgagtcgaactgctactgcatcaaactgtgcatgtaaacac  
ttaagtacta---tatat--  
tlaaaatggagacctacatccctaaacttactaactgtagcatcctagatcaaaatagtgtaaatgagatctgggtcatc  
atctatttagcatgctgaatcctaaaacctttctacctctgggtctcatgcaactcccttctctgacctgcatcaactaac  
cgcaccaccagcttttttc-----  
gtgtggatgcaatgatgaattgatgatactgatgacgctctctactttacaggaactcaccttatcccttgtagcagatg  
gtgtctcacgagacaaaaatcttaacgaactactgaaa-----  
-----  
-----

>CML247\_AY107952

--cactccga-----  
ctcactccccctccccgcccccaaccgctcgcaatggccgcccgtctccgcagccccgaggccctcgatgcctccccgact  
cgcc---ctccgtgccacactcttctcctccgcctctccgctcccaatgcgcgcgctccccttactccgcagc-----  
cgcttccgctccttgaccacggcctacgctgtcaagcaggacacggccctctggaccctgacccgctctccgccatcag  
tgctgccaccgacgacggctccgtctccctcatcgcgctcgacctatctgacgccacggacctcgtggactcgtacacga  
acccgggccaatacctcctgatccgcgtacccggcgagga-g--  
ctcaagccggcggtacatgggtcatctcctcgccgcctaaagcggggccccgggttcgaattcctcgtcaaaagcgtgccggg  
agctaccgccccgggctctgcgccctccgagacggggatggtgtggagctcggcgccgtcacggggaaggggttcccc  
tcgacaggataaatccgcccagcgtcgcgcagaccgtgctcatcttcgccccggggacggggatcaggtcattctcgtcc  
ctt-  
gtttctctactcaatacatctgtccttatatttactccacataaaataaatcatataatctacggacgggtctcttcatatt  
tatttaccgtgctgatgcagcacctcttgatgagccgctgtaattgtgtctggtttgtaggaagaatgccatcaaacccttc  
ttttcttcattaatcgtttcaaccagccga---  
agaatggacggttggtttaccatcctagagttgggtatgcttaatacaaaaataagaatggacggttggttaaccatcctcat  
cctggagcagagctagaattagtttcaaccagccgactagctgagctctggtgctgctgtgaagcagaagccacatct--  
tgctgttctcattgcccactctgcgccgctgcttctgatgattccatttacttctgcccagagtcactctctcccgtcag  
ttctgtgta-----  
atltgtggccactggggtagaagggatgggtcgcagcccccttgcaataggggtgtctcatatctggtgtgggtattatca

tggcctcacgtgttcttatgcatctgctcaagggtgagtagctttgaggtctccttgtgtgcatccatctcacgtagtaa  
taaatacaagaaaaagaaagctttcttaataaaaaatgttttgggggttttaagggtcttctccaaatagcaaactacaagt  
tcttttatgggtgcaaccgcagaggtgagat-----gagacaacacatttgaatcg-  
tggacgtcatacgaataaatttccgggtactattgctaccgtgcctaacagactaccagagcctcctacaagtagttgc  
tgacaacttt-  
gagtttgacaattgacatgctatcaactacctactgcagcaacaaactatgggtcagggactaggtcatccatagatggaa  
atcataatcctcaagaataactatctcagtttccatctgcattgtggctgactagctaatcttctactcttaagttt  
tgggctcctctgatctttcccaaatatctcctgtatcttggatgagtgagattcgatcacttatcgagttcggttt  
cgctgccaaagaaagagctgatgtgaggctttattatgggtgatacaagtctgaaatctatgtcataccaggttggagaaa  
tttccctatgtactgtatgcaagtctgtatcttgcgggagaagcctttagctcacataacagagatacataatcttctg  
tttggcaggaaaggcttagtaactgggagtcactggaatataaataataaccagctcttatcacaaccagatgacagctgg  
aaaggtgaacgaggatattgttcaggtaatacaagaaatgctccaccattgttttgtcttattg-----  
-----  
agacatccttctaattgacattaatcttgcaggatgctttctcagaaacaagaacatagtaaatccatcttctacaggag  
ccatacttctgtggaccgaatgaaatgcaggaggtgtgcatgttgttgtttcaagactcttttgcataactttactatt  
aagcatgctgagcctatgacaaaaattgttctacttctgtgagtcgaactgctactgcatcaaacgtgcatgtaaacac  
ttaagtacta---tatat--  
ttaaataaggagacctacatccctaaacttactaactgtagcatcctagatcaaaatagttctaattgagatctggctcatc  
atctatcttagcatgctgaatcctaaaacctttctacctctggctctcatgcactcccttctctgacctgcatcaactaac  
cgcaccaccagcttttttc-----  
gtgtggatgcaatgatgaattgatgatactgatgacgctctctactttacaggaactcaccttatcccttgtagcagatg  
gtgtctcacgagacaaaatctaacgaactactgaaa-----  
-----  
-----

>NC350\_AY107952

gacactccga-----  
ctcactccccctccccgccccccaaccgcgtcgcaatggcgcgcgtctccgcagccccgagggcctcgtatgctccccgact  
cgccgcctcctggtgccacctcttctcctccgcctctccgctcccaatgcgcgcgcctccccctactccgcagc-----  
cgcttccgctccttgaccacggcctacgctgtcaagcaggacacggccctctggaccctgcaccctcctccgcatcag  
tctgcccaccgacagggctccgtctccctcatcgccgtcgacctatctgacgccacggacctcgtggactcgtacacga  
accggggccaatacctcctgatccgcgtaccggcgagga-g--  
ctcaagccggcgtacatgggtcatctcctcgccgcctaaagcggggccccgggtcgaattcctcgtcaaaagcgtgcccgg  
agctaccgccccggcctctgcccctccgagacggggatgttgtggagctcggcgcctcagggggaaggggttcccc  
tcgacaggataaaatccgcccagcgtcgcgcagaccgtgctcatctcgcggcggggacggggatcaggtcattctcgtcc  
ctt-  
gtttctctactcaatacatctgtccttatatttactccacataaataaatcatataatctacggacgggtctcttcatatt  
tatttaccgtgctgatgcagcacctcttgatgagccgctgtaattgtgtctgtttgttaggaagaatgccatcaaaccttc  
ttttcttcatataatcgtttcaaccagccga---  
agaatggacgttgttttaccatcctagagttgggtatgcttaatacaaaaataagaatggacgttgtttaaccatcctcat  
cctggagcagagctagaattagtttcaaccagccgactagctgagctctggtgctgctggaagcagaagccacatct--  
tgcgttccctcattgccatctgcgcgcgtgcttctgatgattccatttacttccctgccagagtcactctctccgctcag  
tttctgtgta-----  
atctgtggccactggggtagaaggatgggtcgcagcccccttgcaataggggtgtctcgtatctgttgtgggtattatca  
tggcctcacgtgttcttatgcatctgctcaagggtgagtagctttgaggtctccttgtgtgcatccatctcacgtagtaa  
taaatacaagaaaaagaaagctttcttaataaaaaatgttttgggggttttaagggtcttctccaaatagcaaactacaagt  
tcttttatgggtgcaaccgcagaggtgagat-----gagacaacacatttgaatcg-  
tggacgtcatacgaataaatttccgggtactattgctaccgtgcctaacagactaccagagcctcctacaagtagttgc  
tgacaacttt-  
gagtttgacaattgacatgctatcaactacctactgcagcaacaaactatgggtcagggactaggtcatccatagatggaa  
atcataatcctcaagaataactatctcagtttccatctgcattgtggctgactagctaatcttctactcttaagttt  
tgggctcctctgatctttcccaaatatctcctgtatcttggatgagtgagattcgatcacttatcgagttcggttt  
cgctgccaaagaaagagctgatgtgaggctttattatgggtgatacaagtctgaaatctatgtcataccaggttggagaaa  
tttccctatgtactgtatgcaagtctgtatcttgcgggagaagcctttagctcacataacaaagatacataatcttctg  
tttggcaggaaaggcttagtaactgggagtcactggaatataaataataaccagctcttatcacaaccagatgacagctgg  
aaaggtgaacgaggatattgttcaggtaatacaagaaatgctccaccattgttttgtcttattg-----  
-----

agacatccttctaataacattccttgcaggatgctttcttcagaaacaagaacatagtaaatccatcttctacaggag  
ccatactttgtggaccgaatgaaatgcaggagggtgcatgtgtgtgtttcaagactctttttgcataactttactatt  
aagcatgctgagcctatgacaaaaattgtttgctacttgtgagtcgaactgctactgcatcaaactgtgcatgtaaacac  
ttaagtacta---tatat--  
ttaaaatggagacctacatccctaaacttactaactgtagcatcctagatcaaaatagtgctaatgagatctggctcatc  
atctatcttagcatgctgaatcctaaaacctttctacctctggctctcatgcactcccttctctgacctgcatcaactaac  
cgcaccaccagcttttttc-----  
gtgtggatgcaatgatgaattgatgatactgatgacgctctctactttacaggaactcaccttatcccttgtagcagatg  
gtgtctcacgagacaaaaatcttaacgaactactgaaa-----  
-----  
-----

>HP301\_AY107952

-acactccga-----  
ctcactccccctccccgcccccaaccgctcgcaatggcgcgcgctctccgcagccccgaggccctcgatgcctccccgact  
cgcc---ctcgcgtgccacactcttctcctccgcctctccgcctcccaatgcgcgcgctccccctactccgcagc-----  
cgcttccgctccttgaccacggcctacgctgtcaagcaggacacggccctctggaccctcgaccctgctccgcatcag  
tgctgccaccgacgacggctccgtctccctcatcgccgtcgacctatctgacgccacggacctcgtggactcgtacacga  
accggggccaatacctcctgatccgcgtaccgggcgagga-g--  
ctcaagcggcgtacatgggtcatctcctcgccgcctaaagcggggcccccgggttcgaattcctcgtcaaaagcgtgcccggg  
agctaccgccccggcctctgcccctccgagacggggatgtgtggagctcggcgcctcacggggaaggggttcccc  
tcgacaggataaatccgcccagcgtcgccgagaccgtgctcatctcgcggcggggacggggatcaggtcatctcgtcc  
ctt-  
gtttctctactcaatacatctgtccttatatttactccacataaaataaatcatataatctacggacgggtctcttcatatt  
tatttacgctgctgatgcagcacctcttgatgagccgctgtaattgtgtctgttttaggaagaatgccatcaaaccttc  
tttcttcatataatcgtttcaaccagccga---  
agaatggacggtgttttaccatcctagagttggatgcttaatacaaaaataagaatggacggtgtttaaccatcctcat  
cctggagcagagctagaattagtttcaaccagccgactagctgagctgctgtgctgctggaagcagaagccacatct--  
tgctgttctcattgcccactctgcccgcgtgcttctgatgattccatttacttctgcccagagtcactctctccgctcag  
ttctgtgta-----  
atltgtggccactggggtagaagggatggctcgcagcccccttgcaataggggtgtctcgatctggtgtgggtattatca  
tggcctcacggtgttcttatgcatctgctcaagggttgagtagcttggaggtctccttgtgtgcatccatctcacgtagtaa  
taaatcaagaaaaagaaagctttcttaataaaaaatgttttgggggttttaaggctcttccaaattagcaaaactacaagt  
tcttttatggttgcaaccgcagaggtgagat-----gagacaacacatttgaatcg-  
tggacgtcatacgaatataatctccggttactattgctaccgtgcctaacagactaccagagcctcctacaagtagttgc  
tgacaacttt-  
gagtttgacaattgacatgctatcaactacctactgcagcaaaaactatgggtcagggactaggtcatccatagatggaa  
atcataatcctcaagaataactatctcagtttccatctgcatgtgtggctgactagctaatcttctactcttaagttt  
tgggcctcctctgatctttcccaatataatctcctgtatcttggatgcagtgcatccatctcaggttccggtt  
cgctgccaaaagaaagagctgatgtgaggctttatattgggtgatacaagctgaaatctatgtcataccaggttggagaaa  
tttccctatgtactgtatgcaagctcgtgtatcttgcgggagaagcctttagctcacataaaaagatacataatcttctg  
tttggcaggaaggcttagtaactgggagtcactggaatataaataataaccagctcttatcacaaccagatgacagctgg  
aaaggtgaacgaggatattgttcaggtaatacaagaaatgctccaccattgttttgtcttattg-----  
-----  
agacatccttctaataacattccttgcaggatgctttcttcagaaacaagaacatagtaaatccatcttctacaggag  
ccatactttgtggaccgaatgaaatgcaggagggtgcatgtgtgtgtttcaagactctttttgcataactttactatt  
aagcatgctgagcctatgacaaaaattgtttgctacttgtgagtcgaactgctactgcatcaaactgtgcatgtaaacac  
ttaagtacta---tatat--  
ttaaaatggagacctacatccctaaacttactaactgtagcatcctagatcaaaatagtgctaatgagatctggctcatc  
atctatcttagcatgctgaatcctaaaacctttctacctctggctctcatgcactcccttctctgacctgcatcaactaac  
cgcaccaccagcttttttc-----  
gtgtggatgcaatgatgaattgatgatactgatgacgctctctactttacaggaactcaccttatcccttgtagcagatg  
gtgtctcacgagacaaaaatcttaacgaactactgaaa-----  
-----  
-----

>Ky21\_AY107952

gacactccga-----  
ctcactccccctccccgcccccaaccgctcgcaatggccgccgctctccgcagccccgagggccctcgatgcctccccgact  
cgcc---ctccgctgcccacctcttctcctccgcctctccgctcccaatgcccgcgctccccctactccgcagc-----  
cgcttccgctccttgaccacggcctacgctgtcaagcaggacacggccctctggaccctcgaccctcgccatcag  
tgctgccaccgacgacggctccgctccctcatcgccgctcgacctatctgacgccacggacctcgtggactcgtacacga  
accggggccaatacctcctgatccgcgtaccggcgagga-g--  
ctcaagccggcgtacatggtcatctcctcgccgcctaaagcggggccccgggttcgaattcctcgtcaaaagcgtgccggg  
agctaccgccccgggctctgcccctccgagacggggatggtgtggagctcggcgccgctcacggggaaggggttcccc  
tcgacaggataaatccgcccgacgtcgccgacacgctgctcatcttccggggggggacgggggatcaggtcattctcgtcc  
ctt-  
gtttctctactcaatacatctgtccttatatttactccacataaataaatcatataatctacggacgggtctcttcatatt  
tatttaccgctgctgatgcagcacctcttgatgagccgctgtaattgtgtctggttgttaggaagaatgccatcaaaccttc  
ttttcttcattaatcgtttcaaccagccga---  
agaatggacggttgttttaccatcctagagttgggtatgcttaatcaacaaataagaatggacggttgtttaaccatcctcat  
cctggagcagagctagaattagtttcaaccagccgactagctgagctctggtgctgctggaagcagaagccacatct--  
tgctgttctcattgccatctgcccgctgcttctgatgattccatttacttctgcccagagtcactctctcccgctcag  
tttctgtgta-----  
atgtgtggccactggggtagaagggatggtcgcagcccccttgcfaataggggtgtctcgtatctggtgtgggtattatca  
tggcctcacggtgttcttatgcatctgctcaaggttgagtacgtttgaggtctccttgtgtgcatccatttccagtagtaa  
taaatcaagaaaaagaaagctttcttaataaaaaatgttttgggggttttaaggtcttctccaaatagcaaaactacaagt  
tcttttatgggttgcaaccgcagaggtgagat-----gagacaacacatttgaatcg-  
tggacgtcatacgaaatlaatttccggttactatgtctaccgtgcctaacagactaccagagcctcctacaagtagttgc  
tgacaacttt-  
gagtttgacaattgacatgctatcaactacctactgcagcaacaaactatgggtcagggactaggtcatccatagatggaa  
atcataatcctcaagaatactatttccagtttccatctgcattgtggctgactagctaattttgccttctactcttaagttt  
tgggctcctctgatctttcccaaatlaactcctctgatttttgatgagctgagattcgatcacttatcgagttcggttt  
cgctgccaaagaaagagctgatgtgaggctttattatgggtgatacaagtctgaaatctatgtcataaccaggttggagaaa  
tttccccctatgtactgtatgcaagtctgtgatttgcgggagaagcctttagctcacataacaaagatacataattttctg  
tttggcaggaaaggttagtaactgggagtcactggaatlaaaataataaccagctcttatcacaaccagatgacagctgg  
aaaggtgaacgaggatagttcaggtlaatacaagaaatgctccaccattggtttgtcttattg-----  
-----  
agacatccttctaatacattaatcttgcaggatgctttcttcagaaacaagaacatagtaaatccatcttctacaggag  
ccatactttgtggaccgaatgaaatgcaggaggtgtgcattgttgttgtttcaagactctttttgcataactttactatt  
aagcatgctgagcctatgacaaaaattgtttgctacttgtgagtcgaactgctactgcatcaaacctgtgcatgtaaacac  
ttaagtacta---tatat--  
tlaaaatggagacctacatccctaaacttactaactgtagcatcctagatcaaaatagttctaatgagatctgggtcatc  
atctatttagcatgctgaaatcctaaaacctttctacctctggctctcatgcactcccttctctgacctgcatcaactaac  
cgcaccaccagcttttttc-----  
gtgtggatgcaatgatgaattgatgatactgatgacgctctctactttacaggaactcaccttatcccttgttagcagatg  
gtgtctcacgagacaaaatctaacgaactactgaaa-----  
-----  
-----

>Balsas\_INIFAP JSP y Lo5130\_AY107952

---actccga-----  
ctcactccccctccccgcccccaaccgctcgcaatggccgccgctctccgcagccccgagggccctcgatgcctccccgact  
cgcc---ctccgctgcccacctcttctcctccgcctctccgctcccaatgcccgcgctccccctactccgcagc-----  
cgcttccgctccttgaccacggcctacgctgtcaagcaggacacggccctctggaccctcgaccctcgccatcag  
tgctgccaccgacgacggctccgctccctcatcgccgctcgacctatctgacgccacggacctcgtggactcgtacacga  
accggggccaatacctcctgatccgcgtaccggcgagga-g--  
ctcaagccggcgtacatggtcatctcctcgccgcctaaagcggggccccgggttcgaattcctcgtcaaaagcgtgccggg  
agctaccgccccgggctctgcccctccgagacggggatggtgtggagctcggcgccgctcacggggaaggggttcccc  
tcgacaggataaatccgcccgacgtcgccgacacgctgctcatcttccggggggggacgggggatcaggtcattctcgtcc  
ctt-  
gtttctgtactcaatacatctgtccttatatttactccacataaataaatcatataatctacggacgggtctcttcatatt  
tatttaccgctgctgatgcagcacctcccgatgagccgctgtaattgtgtctggttgttaggaagaatgccatcaaaccttc  
ttttcttcattaatcgtttcaaccagccga---

agaatggacggttggtttaccatcctagagttggtatgcttaatcaacaaataagaatggacggttggttaaccatcctcat  
cctggagcagagctagaattagtttcaaccagccgactagctgagctctggtgctgatgtgaagcagaagccacatct--  
tgctgttccctcattgccatctgcgccgctgcttctgatgattccatttacttccctgcc-  
agagtcactctctcccgtcagtttctgtgta-----  
atltgtggccactggggtagaagggatggtcgcagcccccttccaataggggtgtctcgatctggttggttattatca  
tggactcacgtgttcttatgcatctgctcaaggttgagatggttgagggtctccttggtgcatccatttcacgtagtaa  
taaatcaagaaaaagaaagctttcttaataaaaaatgttttggggctttaagggtcttctccaaattagcaaactacaagt  
tcttttatggttgcaaccgcagaggtgagat-----gagacaacacatttgaatcg-  
tggacatcatacgaataatltccggttactattgctaccgtgcctaacagactaccagagcctcctacaagtagttgc  
tgacaacttt-  
gagtttgacaattgacatgctatcaactacctactgcagcaacaaactatggtcagggactaggtcatccatagatggaa  
atcataatcctcaagaataactatltcagtttccatctgcattgtggctgactagctaatlttgcttctactcttaagttt  
tgggcctcctctgatctttcccaaatlaactcctctgattttttatgcaagtgcgattcgatcacttattgagttcggttt  
cgctgccaaagaaagagctgatgtgaggctttattatggtgatacaagctgaaatctatgtcataccagggtggagaaa  
tttccctatgtactgtatgcaagctcgtgtatlttgccagagaagcctttagctcacataacaaagatacataatlttctg  
tttgacaggaaggttagtaactgggagtcaactggaatlaaaaaataaccagctcttatcacaaccagatgacagctgg  
aaaggtgaacgaggatattgttcaggtaatacaagaaatgctccaccattgttttcttattg-----  
-----  
agacatccttctaattgacattaatcttgcaggatgctttcttcagaaacaagaacatagtaaatccatcttctacaggag  
ccatactlttgtaggaccgaatgaaatgcaggaggtgtgcatgtgtgtgttcaagactcttttgcataacttactatt  
aagcatgctgagcctatgacaaaaatgtttgctacttgtgagtcgaactgctactgcatcaaactgtgcatgtaaacac  
ttaagtacta---tatat--  
tlaaaatggagacctacatccctaaacttactaactgtagcatcctagatcaaaattagtctaattgagatctggctcatc  
atctatlttagcatgctgaatccctaaaaccttctacctctggctctcatgcactcccttctctgacctgcatcaactaac  
cgcaccaccagctttttt-----  
gtgtggatgcaatgatgaattgatgatactgatgacgctctctactttacaggaactcaccttatcccttgtagcagatg  
gtgtctcacgagacaaaacttlaacgaactactgaaagcgatctccggctctctgatgtatlttatgaccagttaggctc  
aacgtgtaaactlttattgcttaggctggctgtgatgttccagtgatataatgaataaactactgaacttgagacgaggat  
gtaatgttcagtgatataattatgaataa

>Oaxaca\_INIFAP JSG 197\_AY107952

gacactccga-----  
ctcactccccctccccgcaccaaccgctcgcaatggccgcccgtctccgcagccccgaggccctcgatgcctccccgact  
cgcc---ctccgtgcccacctcttctcctcgcctctccgctcccaatgcgcgcgctccccctactccgcagc-----  
cgcttccgctccttgaccacggcctacgctgtcaagcaggacacggccctctggaccctgcaccgctctccgccatcag  
tgctgccaccgacgacggctccgtctccctcatcgccgtcgacctatctgacgccacggacctcgtggactcgtacacga  
accggggccaatacctcctgatccgcgtaccgggcgagga-g--  
ctcaagccggcgtacatggtcatctcctcgccgctaaagcggggcccggttcgaattcctcgtcaaaagcgtgcccggg  
agctaccgccccgggctctgcgccctccgagacggggatgtgtggagctcggcgccgtcacggggaaggggttcccc  
tcgacaggataaatccgcccagcgtcgcgcagaccgtgctcatctcgcggcggggacggggatcaggtcatctcgtcc  
ctt-  
gtttctctactcaatacatctgtccttatatttactccacataaaataaatcatataatctacggacgggtctcttcatatt  
tatttaccgtgctgatgcagcacctcccgatgagccgctgtaattgtgtctggttgtaggaagaatgccatcaaacctt  
tttcttcatlaattcgtttcaaccagccga---  
agaatggacggttggtttaccatcctagagttggtatgcttaatcaacaaataagaatggacggttggttaaccatcctcat  
cctggagcagagctagaattagtttcaaccagccgactagctgagctctggtgctgatgtgaagcagaagccacatct--  
tgctgttccctcattgccatctgcgccgctgcttctgatgattccatttacttccctgcc-  
agagtcactctctcccgtcagtttctgtgta-----  
atltgtggccactggggtagaagggatggtcgcagcccccttccaataggggtgtctcgatctggttggttattatca  
tggactcacgtgttcttatgcatctgctcaaggttgagatggttgagggtctccttggtgcatccatttcacgtagtaa  
taaatcaagaaaaagaaagctttcttaataaaaaatgttttggggctttaagggtcttctccaaattagcaaactacaagt  
tcttttatggttgcaaccgcagaggtgagat-----gagacaacacatttgaatcg-  
tggacatcatacgaataatltccggttactattgctaccgtgcctaacagactaccagagcctcctacaagtagttgc  
tgacaacttt-  
gagtttgacaattgacatgctatcaactacctactgcagcaacaaactatggtcagggactaggtcatccatagatggaa  
atcataatcctcaagaataactatltcagtttccatctgcattgtggctgactagctaatlttgcttctactcttaagttt  
tgggcctcctctgatctttcccaaatlaactcctctgattttttatgcaagtgcgattcgatcacttattgagttcggttt

cgctgccaaagaaagagctgatgtgaggctttattatgggtgatacaagctctgaaatctatgtcataaccagggtggagaaa  
tttcccctatgtactgtatgcaagtcgtgtatgtgcccagagaagcctttagctcacataacaaagatacataattttctg  
tttgacaggaaaggcttagtaactgggagtcactggaatataaataataccagctctatcacaaccagatgacagctgg  
aaaggtgaacgaggatagtgtcaggttaatacaagaaatgctccaccattggtttgtcttattg-----  
-----

agacatccttctaataatgacattaatcttgcaggatgctttcttcagaaacaagaacatagtaaatccatcttctacaggag  
ccatactttgtggaccgaatgaaatgcaggaggtgtgcattgttgttgtttcaagactctttttgcataactttactatt  
aagcatgctgagcctatgacaaaaatgtttgtacttgtgagtcgaactgctactgcatcaaactgtgcatgtaaacac  
ttaagtacta---tatat--  
ttaaaatggagacctacatccctaaacttactaactgtagcatcctagatcaaaattagtctaataatgagatctggctcatc  
atctattttagcatgctgaatcctaaaacctttctacctctggctcttatgcaactcccttctctgacctgcatcaactaac  
cgcaccaccagcttttttc-----  
gtgtggatgcaatgatgaattgatgatactgatgacgctctctactttacaggaactcaccttatcccttgtagcagatg  
gtgtctcagagacaaaatctaacgaactactgaaagcgcctcctcggtctctgatgtattttatgaccagttaggcctc  
aacgtgtaaactttattgtctaggcctggctgtgatgttccagtgatataatgaataaactactgaacttgagacgaggat  
gtaatgttcagtgatataattatataatgaataa

>Balsas\_Wilkes Site 6\_AY107952

gacactccga-----

ctcactccccctccccgcaccaacccgctcgcaatggcgcgcgtctccgcagccccgaggccctcgatgcctccccgact  
cgcc---ctccgtgccacctcttctcctccgcctctccgcctcccaatgcccgcgcgtcccccttactccgcagc-----  
cgcttccgctccttgaccacggcctacgctgtcaagcaggacacggccctctggaccctcgcaccctcctccgcatcag  
tgctgccaccgacgacggctccgctcctctcatcgccgtcgacctatctgacgccacggacctcgtggactcgtacacga  
accggggccaatacctcctgatccgcgtaccggcgagga-g--

ctcaagccggcgtacatggtcatctcctcgcgcctaaagcggggccccgggttcgaattcctcgtcaaaagcgtgcccggg  
agctaccgccccggcgtctgcccctccgagacggggatgttgtggagctcggcgcgcgtcacggggaaggggttcccc  
tcgacaggataaatccgcccagcgtcgcgcagaccgtgctcatcttcgcccgggggacgggggatcaggtcattctcgtcc  
ctt-

gtttctctactcaatacatctgtccttatatttactccacataaataaataatcatataatctacggacgggtctcttcatatt  
tatttaccgtgctgatgcagcacctcttgatgagccgctgtaattgtgtctgtttgttaggaagaatgccatcaaaccttc  
ttttcttcatataatcgtttcaaccagccga---

agaatggacgttgttttaccatcctagagttgggtatgcttaatacaaaaataagaatggacgttgtttaaccatcctcat  
cctggagcagagctagaattagtttcaaccagccgactagctgagctctgttgcgtgctgtaagcagaagccacatct--  
tgctgttctcattgccatctgcgcgcgtgcttctgatgattccatttacttctctgcc-

agagtcactctctcccgtcagtttctgtgta-----

atgtgtggccactggggtagaagggatgggtcgcagcccccttccaataggggtgtctcgtatctgttgtgggtattatca  
tggcctcacgtgttcttatgcatctgctcaaggttgagtacgtttgaggtctccttgtgtgcatccatttcacgtagtaa  
taaatcaagaaaaagaaagctttcttaataaaaatgttttggggcttcaaggtcttctccaaatagcaaaactacaagt  
tctttcatgggtgcaaccgcagaggtgagat-----gagacaacacatttgaatcg-

tggacatcatacgaataatattctgggtactattgctaccgctgcccaacagactaccagagcctcctacaagtagttgc  
tgacaacttt-

gagtttgacaattgacatgctatcagctacctactgcagcaaaaactatgggtcagggactaggtcatccatagatggaa  
atcataatcctcaagaataactatttcagtttccatctgcattgtggctgactagctaattttgccttctactcttaagttt  
tgggcctcctctgatctttcccaaatataatctcctgtattttggatgacagtgcatcacttatcgagttcgggtt  
cgctgccaaagaaagagctgatgtgaggctttattatgggtgatacaagctctgaaatctatgtcataaccagggtggagaaa  
tttcccctatgtactgtatgcaagtcgtgtatgtgcccagagaagcctttagctcacataacaaagatacataattttctg  
tttggcaggaaaggcttagtaactgggagtcactggaatataaataataccagctctatcacaaccagatgacagctgg  
aaaggtgaacgaggatagtgtcaggttaatacaagaaatgctccaccattggtttgtcttattg-----  
-----

agacatccttctaataatgacattaatcttgcaggatgctttcttcagaaacaagaacatagtaaatccatcttctacaggag  
ccatactttgtggaccgaatgaaatgcaggaggtgtgcattgttgttgtttcaagactctttttgcataactttactatt  
aagcatgctgagcctatgacaaaaatgtttgtacttgtgagtcgaactgctactgcatcaaactgtgcatgtaaacac  
ttaagtacta---tatat--

ttaaaatggagacctacatccctaaacttactaactgtagcatcctagatcaaaattagtctaataatgagatctggctcatc  
atctattttagcatgctgaatcctaaaacctttctacctctggctctcatgcaactcccttctctgacctgcatcaactaac  
cgcaccaccagcttttttc-----

gtgtggatgcaatgatgaattgatgatactgatgacgctctctactttacaggaactcaccttatcccttgtagcagatg

gtgtctcacgagacaaaatcttaacgaactactgaaagcgatctccggctctctgatgtatTTTTatgaccagttaggcctc  
aacgtgtaaactTTTatTgcttaggcctggctgtgatgttccagtgatatatgaataaactactgaacttgagacgaggat  
gtaatgttcagtgatatatttatatgaataa

>Balsas\_CIMMYT 11355\_AY107952

---actccga-----

ctcactccccctccccgccecaaccgctcgcaatggccgcgctctccgcagccccgaggccctcgatgcctccccgact  
cgcc---ctccgtgcccacctcttctcctccgcctctccgctcccaatgcgcgcgctccccctactccgcagc-----  
cgcttccgctccttgaccacggcctacgctgtcaagcaggacacggccctctggaccctgcaccgctctccgccatcag  
tgctgccaccgacgacggctccgtctccctcatcgccgtcgacctatctgacgccacggacctcgtggactcgtacacga  
accggggccaatacctcctgatccgcgtaccgggcgagga-g--

ctcaagccggcgtacatggctcatctcctcgccgcctaaagcggggcccggttcgaattcctcgtcaaaagcgtgccggg  
agctaccgccccggcctctgcgccctccgagacggggatgttggagctcggcgccgtcacggggaaggggttcccc  
tcgacaggataaatccgcccagcgtcgcgacagccgtgctcatctcgcggcggggacggggatcaggtcattctcgtcc  
ctt-

gtttctgtactcaatacatctgtccttatatttactccacataaataaatcatataatctacggacggctctctcatatt  
tattaccgtgctgatgcagcacctcccgatgagccgctgtaattgtgtctgtttgtaggaagaatgccatcaaaccctc  
ttttcttcattaatcgtttcaaccagccga---

agaatggacgttgTTTTaccatcctagagtgggtatgcttaatcaacaaataagaatggacgttgTTTaaacctcctcat  
cctggagcagagctagaattagTTTTcaaccagccgactagctgagctctgTTgctgatgtgaagcagaagccacatct--  
tgctgttctcattgccatctgcgccgctgcttctgatgattccatttacttctcgtcc-  
agagtcactctctcccgctcagtttctgtgta-----

atTTgtggccactggggtagaagggatggctcgagcccccttccaataggggtgctcgtatctgTTgtgggtattatca  
tggaactcacgtgTTcttatgcatctgctcaaggttgagatgTTtgaggtctccttgtgtgcatccatttcacgtagtaa  
taaatcaagaaaaagaaagctTTTcttaataaaaaatgTTTTggggctTTaaggtcttctccaaattagcaaaactacaagt  
tctTTtatggttgcaaccgcagaggtgagat-----gagacaacacatttgaatcg-

tggaactcatacgaataatTTTccggttactattgctaccgtgcctaacagactaccagagcctcctacaagtagttgc  
tgacaacttt-

gagtttgacaattgacatgctatcaactacctactgcagcaacaaactatggctcagggactaggtcatccatagatggaa  
atcataactcctcaagaataactatTTcagtttccatctgcattgtggctgactagctaatTTTgcttctactcttaagttt  
tgggcctcctctgatctTTTcccaatTaatctcctgtaTTTTTatgcaagtgcgattcgatcacttatTgagttcggTT  
cgctgccaaagaaagagctgatgtgaggctTTTattatgggtgatacaagctgaaatctatgtcataaccaggttgagaaa  
TTTccccatgtactgtatgcaagctcgtgtaTTTgccagagaagcctTTtagctcacataacaaagatacataatTTTctg  
TTTgacaggaaggttagtaactgggagtcactggaatTaaataataaccagctcttatcacaaccagatgacagctgg  
aaaggtgaaacgaggatagTTTcaggttaatacaagaaatgctccaccattgTTTTgtcttattg-----

-----  
agacatccttctaattgacattaatcttgcaggatgctTTTctcagaaacaagaacatagtaaattccatcttctacaggag  
ccatactTTgtggaccgaatgaaatgcaggaggtgtgcatgTTgtgTTgTTTcaagactctTTTtgcataactTTactatt  
aagcatgctgagcctatgacaaaaatgTTTgctacttgtgagtcgaactgctactgcatcaaactgtgcatgtaaacac  
ttaagtacta---tatat--

tTaaatggagacctacatccctaaacttactaactgtagcatcctagatcaaaattagTctaattgagatctggctcatc  
atctatTTtagcatgctgaatccctaaacctTTTctacctctggctctcatgcactcccttctctgacctgcatcaactaac  
cgcaccaccagctTTTTTc-----

gtgtggatgcaatgatgaattgatgatactgatgacgctctctactTTTtacaggaactcaccttatcccttgtagcagatg  
gtgtctcacgagacaaaatcttaacgaactactgaaagcgatctccggctctctgatgtatTTTTatgaccagttaggcctc  
aacgtgtaaactTTTatTgcttaggcctggctgtgatgttccagtgatatatgaataaactactgaacttgagacgaggat  
gtaatgttcagtgatatatttatatgaataa

>Balsas\_INIFAP JSG y LOS 109\_AY107952

---actccga-----

ctcactccccctccccgccecaaccgctcgcaatggccgcgctctccgcagccccgaggccctcgatgcctccccgact  
cgcc---ctccgtgcccacctcttctcctccgcctctccgctcccaatgcgcgcgctccccctactccgcagc-----  
cgcttccgctccttgaccacggcctacgctgtcaagcaggacacggccctctggaccctgcaccgctctccgccatcag  
tgctgccaccgacgacggctccgtctccctcatcgccgtcgacctatctgacgccacggacctcgtggactcgtacacga  
accggggccaatacctcctgatccgcgtaccgggcgagga-g--

ctcaagccggcgtacatggctcatctcctcgccgcctaaagcggggcccggttcgaattcctcgtcaaaagcgtgccggg  
agctaccgccccggcctctgcgccctccgagacggggatgttggagctcggcgccgtcacggggaaggggttcccc

tgcacaggataaatccgcccagcgtcgcgcagaccgtgctcatcttcgcgccgggggacgggggatcaggtcattctcgtcc  
ctt-  
gtttctgtactcaatacatctgtccttatatttactccacataaataaatcatataatctacggacgggtctcttcatatt  
tatttaccgtgctgatgcagcacctcccgatgagccgctgtaattgtgtctggtttaggaagaatgccatcaaaccctc  
ttttcttcattaatcgtttcaaccagccga---  
agaatggacggttgttttaccatcctagagttggatgcttaatacaaaaataagaatggacggttgtttaaccatcctcat  
cctggagcagagctagaattagtttcaaccagccgactagctgagctctggtgctgatgtgaagcagaagccacatct--  
tgctgttctcattgccatctgcgccgctgcttctgatgattccatttacttctctgcc-  
agagtcactctctcccgtcagtttctgtgta-----  
atltgtggccactggggtagaagggatggcgcagcccccttccaataggggtgtctcgatctggttgtgggtattatca  
tggactcacgtgttcttatgcatctgctcaaggttgagtagtgggttggaggtctccttgtgtgcatccatttccagtagtaa  
taaatcaagaaaaagaaagctttcttaataaaaaatgttttggggctttaaggtcttctccaaatagcaaaactacaagt  
tcttttatgggtgcaaccgcagaggtgagat-----gagacaacacatttgaatcg-  
tggacatcatacgaatataatttccggttactattgctaccgtgcctaacagactaccagagcctcctacaagtagttgc  
tgacaacttt-  
gagtttgacaattgacatgctatcaactacactgagcaacaaactatgggtcagggactaggtcatccatagatggaa  
atcataatcctcaagaataactatttccagtttccatctgcattgtggctgactagctaattttgcttctactcttaagttt  
tgggctcctctgatctttcccaaatatactcctgtatttttatgagtgatccatcttattgagttcgggtt  
cgctgccaaagaaagagctgatgtgaggctttattatggtgatacaagctctgaaatctatgtcataaccaggttggagaaa  
tttccctatgtagtgaagctgtgatttggcagagaagcctttagctcacataacaaagatacataattttctg  
tttgacaggaaggcttagtaactgggagctcaactggaatataataataccagctcttatcacaaccagatgacagctgg  
aaaggtgaacgaggatattgttcaggtaatacaagaaatgctccaccattgttttgtcttattg-----  
-----  
agacatccttctaataatgacattaatcttgcaggatgctttcttcagaaacaagaacatagtaaatccatcttctacaggag  
ccatactttgtggaccgaatgaaatgcaggaggtgtgcattgttgttgtttcaagactctttttgcataactttactatt  
aagcatgctgagcctatgacaaaaatgtttgctacttgtgagtcgaactgctactgcatcaaactgtgcatgtaaacac  
ttaagtacta---tatat--  
ttaaaatggagacctacatccctaaacttactaactgtagcatcctagatcaaaattagtctaataatgagatctggctcatc  
atctatttagcatgctgaatcctaaacctttctacctctggctctcatgcaactcccttctctgacctgcatcaactaac  
cgcaccaccagcttttttc-----  
gtgtggatgcaatgatgaattgatgatactgatgacgctctctactttacaggaactcaccttatcccttgtagcagatg  
gtgtctcacgagacaaaatctaacgaactactgaaagcgcctcctggctctctgatgtattttatgaccagttaggcctc  
aacgtgtaaactttattgcttaggcctggctgtgatgttccagtgatataatgaataaactactgaacttgagacgaggat  
gtaattgtcagtgatataattatataatgaataa

>Balsas\_INIFAP JSG y LOS 119\_AY107952

---actccga-----

ctcactccctctccccgcccccaaccgctcgcaatggccgcgctctccgcagccccgagggcctcgatgcctccccgact  
cgcc---ctccgtgccacctcttctcctccgcctctccgctcccaatgcgcgcgctcccttactccgcagc-----  
cgcctccgctccttgaccacggcctacgctgtcaagcaggacacggccctctggaccctgcaccgctctccgccatcag  
tgctgccaccgacgacggctccgctccctcatcgccgtcgacctatctgacgccacggacctcgtggactcgtacacga  
accggggccaatacctcctgatccgcgtaccgggggagga-g--  
ctcaagccggcgtacatggtcatctcctcgcgcctaaagcggggcccccgggttcgaattcctcgtcaaaagcgtgcccggg  
agctaccgccccggcctctgcgccctccgagacggggatgttgtggagctcggcgcgctcacggggaaggggttcccc  
tcgacaggataaatccgcccagcgtcgcgcagaccgtgctcatcttcgcgccgggggacgggggatcaggtcattctcgtcc  
ctt-  
gtttctctactcaatacatctgtccttatatttactccacataaataaatcatataatctacggacgggtctcttcatatt  
tatttaccgtgctgatgcagcacctcccgatgagccgctgtaattgtgtctggtttaggaagaatgccatcaaaccctc  
ttttcttcattaatcgtttcaaccaaccga---  
agaatggacggttgtttgaccatcctagagttggatgcttaatacaaaaataagaatggacggttgtttaaccatcctcat  
cctggagcagagctagaattagtttcaaccagccgactagctgagctctggtgctgatgtgaagcagaagccacatct--  
tgctgttctcattgccatctgcgccgctgcttctgatgattccatttacttctctgcc-  
agagtcactctctcccgttagtttctgtgta-----  
atltgtggccactggggtagaagggatggcgcagcccccttccaataggggtgtctcgatctggttgtgggtattatca  
tggcctcacgtgttcttatgcatctgctcaaggttgagtagcttggaggtctccttgtgtgcatccatttccagtagtaa  
taaatcaagaaaaagaaagctttcttaataaaaaatgttttggggctttaaggtcttctccaaatagcaaaactacaagt  
tcttttatgggtgcaaccgcagaggtgagat-----gagacaacacatttgaatcg-



tggacatcatacgaataaattttctggttactattgctaccgtgcctaacagactaccagagcctcctacaagtagttgc  
cgacaacttt-  
gagtttgacaattgacatgctatcagctacctactgcagcaacaaactatgggtcagggactaggtcatccatagatggaa  
atcataatcctcaagaataactatctcagtttccatctgcattgtggctgactagctaattttgcttctactcttaagttt  
tgggcctcctctgatctttcccaattaatctcctgtatctttgatgagtgatcgatcacttatcgagttcggttt  
cgctgccaaagaaagagctgatgtgaggctttattatgggtgatacaagctctgaaatctatgtcataaccaggttggagaaa  
tttccctatgtactgtatgcaagtcgtgtatcttggcagagaagcctttagctcacataacaaagatacataatcttctg  
tttggcaggaaggcttagtaactgggagtcactggaatataaataataaccagctcttatcacaaccagatgacagctgg  
aaaggtgaacgaggatattgttcaggtaatacaagaaatgctccaccattgttttgtcttattg-----  
-----

agacatccttctaataatgacattaatcttgcaggatgctttcttcagaaacaagaacatagtaaatccatcttctacaggag  
ccatactttgtggaccgaatgaaatgcaggaggtgtgcattgttgttctcaagactcttttgcataactttactatt  
aagcatgctgagcctatgacaaaaattgtttgctacttgtgagtcgaactgctactgcatcaaactgtgcatgtaaacac  
ttaagtacta---tatat--  
ttaaattggagacctacatccctaaacttactaactgtagcatcctagatcaaaattagctaatgagatctggctcatc  
atctatcttagcatgctgaatcctaaaactttctacctctggctctcatgcactcccttctctgacctgcatcaactaac  
cgcaccaccagcttttttc-----  
gtgtggatgcaatgatgaattgatgatactgatgacgctctctactttacaggaactcaccttatcccttgttagcagatg  
gtgtctcacgagacaaaactctaacgaactactgaaagcagatctccggctctctgatgtatctttatgaccagttaggcctc  
aacgtgtaaactttattgcttaggcctggctgtgatgttccagtgatataatgaataaactactgaacttgagacgaagat  
gtaatgttcagtgatataattatgaataa

>Balsas\_INIFAP JSG 378\_AY107952

-----tccga-----

ctcactccctctccccgcaccaacccgctcgcaatggcgcgctctccgcagccccgagggccctcgatgctccccgact  
cgcc---ctcctgcccacctcttctcctccgctctccgctcccaatgcgcgcgctccccctactccgcagc-----  
cgctccgctccttgaccacggcctacgctgtcaagcaggacacggccctctggaccctgaccccgctctccgccatcag  
tgctgccaccgacgacggctccgctctccctcatcgccgctcgacctatctgacgccacggacctcgtggactcgtacacga  
accggggccaatacctcctgatccgcgtaaccgggcgagga-g--  
ctcaagccggcgtacatggctcatctcctcgccgcctaaagcggggcccggttcgaattcctcgtcaaaagcgtgcccggg  
agctaccgccccgggctctgccccctccgagacggggatgttgtggagctcggcgcgctcacggggaaggggtcccccc  
tcgacaggataaatccgcccagcgtcgcgacagccgctgctcatcttcgccccggggacggggatcaggtcattctcgtcc  
ctt-

gtttctctactcaatacatctgtccttatatttactccacataaataaatacatataatctacggacggctctcttcatatt  
tatttaccgtgctgatgcagcacctcccgatgagccgctgtaattgtgtctgtttgttaggaagaatgccatcaaaccttc  
ttttcttcatataatcgtttcaaccagccga---

agaatggacgctgtttgaccatcctagagttgggtatgcttaatacaaaaataagaatggacgctgttttaaccatcctcat  
cctggagcagagctagaattagtttcaaccagccgactagctgagctctgttgcctgctgtgaagcagaagccacatct--  
tgctgttctcattgccatctgcgccgctgcttctgatgattccatttacttctcctgcc-

agagtcactctctcccgtagtttctgtgta-----

atgtgtggccactggggtagaagggatgggtcgcagcccccttccaataggggtgtctcgtatctgttgtgggtattatca  
tggcctcacgtgttcttatgcatctgctcaaggttgagtagctttgaggtctccttgtgtgcatccatctcacgtagtaa  
taaatcaagaaaaagaaagctttcttaataaaaaatgttttggggctttaaggctcttctccaaattagcaaaactacaagt  
tcttttatggttgcaaccgagaggtgagat-----gagacaacacatttgaatcg-

tggacatcatacgaataaattttctggttactattgctaccgtgcctaacagactaccagagcctcctacaagtagttgc  
tgacaacttt-

gagtttgacaattgacatgctatcagctacctactgcagcaacaaactatgggtcagggactaggtcatccatagatggaa  
atcataatcctcaagaataactatctcagtttccatctgcattgtggctgactagctaattttgcttctactcttaagttt  
tgggcctcctctgatctttcccaattaatctcctgtatctttgatgagtgatcgatcacttatcgagttcggttt  
cgctgccaaagaaagagctgatgtgaggctttattatgggtgatacaagctctgaaatctatgtcataaccaggttggagaaa  
tttccctatgtactgtatgcaagtcgtgtatcttggcggagaagcctttagctcacataacaaagatacataatcttctg  
tttggcaggaaggcttagtaactgggagtcactggaatataaataataaccagctcttatcacaaccagatgacagctgg  
aaaggtgaacgaggatattgttcaggtaatacaagaaatgctccaccattgttttgtcttattg-----  
-----

agacatccttctaataatgacattaatcttgcaggatgctttcttcagaaacaagaacatagtaaatccatcttctacaggag  
ccatactttgtggaccgaatgaaatgcaggaggtgtgcattgttgttctcaagactcttttgcctaactttactatt  
aagcatgctgagcctatgacaaaaattgtttgctacttgtgagtcgaactgctactgcatcaaactgtgcatgtaaacac

ttaagtacta---tatat--ttaaagtggagacctacatccctaaact---  
taactgtagcatcctagatcaaaattagctaatgagatctggctcatcatctatttagcatgctgaatcctaaaacctt  
tctacctctggctctcatgcactcccttctctgacctgcatcaactaaccgcaccaccagcttttttc-----  
gtgtggatgcaatgatgaattgatgatactgatgacgctctctactttacaggaactcaccttatcccttgttagcagatg  
gtgtctcacgagacaaaatctaacgaactactgaaagcgatctccggctctctgatgtattttatgaccagttaggcctc  
aacgtgtaaactttattgcttaggcctggctgtgatgttccagtgatatatgaataaactactgaacttgagacgaggat  
gtaatgttcagtgatatatttatgaataa

>Balsas\_Kato Site 4\_AY107952

----ctccga-----  
ctcactccccctccccgcaccaaccgctcgcaatggcgcgcgctctccgcagccccgaggccctcgatgcctccccgact  
cgcc---ctccgtgccacctcttctcctccgctctccgctcccaatgcgcgcgctccccctactccgcagc-----  
cgcttccgctccttgaccacggcctacgctgtcaagcaggacacggccctctggaccctgcaccgctctccgcatcag  
tgctgccaccgacgacggctccgctcctcatcgccgctcgacctatctgacgccacggacctcgtggactcgtacacga  
accgggccaataacctcctgatccgcgtaccggcgagga-g--  
ctcaagccggcgtacatggtcatctcctcgccgctaaagcggggccccgggttcgaattcctcgtcaaaagcgtgccggg  
agctaccgccccggcctctgccccctccgagacggggatgttgtggagctcggcgcgctcacggggaaggggttcccc  
tcgacaggataaatccgccccgacgtcgccgacaccgctcatcttccggggggggacggggatcaggtcattctcgtcc  
ctt-  
gtttctctactcaatacatctgtccttatatttactccacataaataaatcatataatctacggacgggtctcttcatatt  
tatttaccgtgctgatgcagcacctcccgatgagccgctgtaattgtgtctgtttgttaggaagaatgccatcaaacctc  
ttttcttcatataatcgtttcaaccagccga---  
agaatggacgttgttttaccatcctagagttggatgcttaatcaacaaataagaatggacgttgtttaaccatcctcat  
cctggagcagagctagaattagtttcaaccagccgactagctgagctctggtgctgatgtgaagcagaagccacatct--  
tgctgttctcattgccatctgcgcgctgcttctgatgattccatttacttctctgcc-  
agagtcactctctcccgctcagtttctgtgta-----  
atltgtggccactggggtagaaggatggtcgcagcccccttccaatagggtgtctcgatctggttgtgggttattatca  
tggactcacgtgttcttatgcatctgctcaaggttgagatgtttgaggtctccttgtgtgcatccatttcacgtagtaa  
taaatcaagaaaaaagaagccttcttaataaaaaatgttttggggctttaaaggtcttctccaaatagcaaaactacaagt  
tcttttatggttgcaaccgcagaggtgagat-----gagacaacacatttgaatcg-  
tggacatcatacgaataatctccgggtactattgctaccgtgacctaacagactaccagagcctcctacaagtagttgc  
tgacaacttt-  
gagtttgacaattgacatgctatcaactacactgacgcaacaaactatgggtcagggactaggtcatccatagatggaa  
atcataatcctcaagaataactatctcagtttccatctgcattgtggctgactagctaattttgccttctactcttaagttt  
tgggctcctctgatctttcccaaatatctcctgtatttttatgacgtgcgattcgcacttattgagttcgggtt  
cgctgccaaagaaagagctgatgtgaggctttattatgggtgatacaagctctgaaatctatgtcataaccaggttggagaaa  
tttccccctatgactgtatgcaagctcgtgtatttgccagagaagcctttagctcacataacaaagatacataattttctg  
tttgacaggaaggcttagtaactgggagctcaactggaatataataataaccagctcttatcacaaccagatgacagctgg  
aaaggtgaacgaggatattgttcaggtatacaagaaatgctccaccattgttttgtcttattg-----  
-----  
agacatccttctaataatgacattaatcttgcaggatgctttcttcagaaacaagaacatagtaaatccatcttctacaggag  
ccatactttgtggaccgaatgaaatgcaggaggtgtgcattgttgttgtttcaagactctttttgcataactttactatt  
aagcatgctgagcctat----  
aaaattgtttgctacttgtgagtcgaactgctactgcatcaactgtgcatgtaaacacttaagtacta---tatat--  
ttaaagtggagacctacatccctaaacttactaactgtagcatcctagatcaaaattagctaatgagatctggctcatc  
atctatttagcatgctgaatcctaaaacctttctacctctggctctcatgcactcccttctctgacctgcatcaactaac  
cgcaccaccagcttttttc-----  
gtgtggatgcaatgatgaattgatgatactgatgacgctctctactttacaggaactcaccttatcccttgttagcagatg  
gtgtctcacgagacaaaatctaacgaactactgaaagcgatctccggctctctgatgtattttatgaccagttaggcctc  
aacgtgtaaactttattgcttaggcctggctgtgatgttccagtgatatatgaataaactactgaattt-----  
-----

>Balsas\_CIMMYT 8783\_AY107952

-----tccga-----  
ctcactccccctccccgcaccaaccgctcgcaatggcgcgcgctctccgcagccccgaggccctcgatgcctccccgact  
cgcc---ctccgtgccacctcttctcctccgctctccgctcccaatgcgcgcgctccccctactccgcagc-----  
cgcttccgctccttgaccacggcctacgctgtcaagcaggacacggccctctggaccctgcaccgctctccgcatcag

tgctgccaccgacgacggctccgtctccctcatcgccgtcgacctatctgacgccacggacctcgtggactcgtacacga  
accggggccaatacctcctgatccgcgtaccggcgagga-g--  
ctcaagccggcgtacatgggtcatctcctcgccgcctaaagcggggacccccgggttcgaattcctcgtcaaaagcgtgccggg  
agctaccgccccgggctctgcgccctccgagacggggatggtgtggagctcggcgccgtcacggggaaggggttcccc  
tcgacaggataaatccgcccagcgtcgcgacagaccgtgctcatcttcgccccggggacggggatcaggtcattctcgtcc  
ctt-  
gtttctctactcaatacatctgtccttatatttactccacataaataaatcatataatctacggacgggtctcttcatatt  
tatttaccgtgctgatgcagcacctcccgatgagccgctgtaattgtgtctggtttaggaagaatgccatcaaacccttc  
ttttcttcattaatcgtttcaaccagccga---  
agaatggacggttggtttaccatcctagagtgggtatgcttaatacaaaaataagaatggacggttggttaaccatcctcat  
cctggagcagagctagaattagtttcaaccagccgactagctgagctctggtgctgctggaagcagaagccacatct--  
tgctgttccctcattgccatctgcgccgctgcttctgatgattccatttacttctcgtcc-  
agagtcactctctcccgtcagtttctgtgta-----  
atgtgtggccactggggtagaaggatgggtgagcccccttccaatagggtgctcgtatctggtggttattatca  
tggcctcacgtggttcttatgcacctgctcaagggtgagatggtttaggtctccttggtgcatccatttccagtagtaa  
taaatcaagaaaaagaaagccttcttaataaaaaatgttttggggctttaggtcttctccaaatagcaaaactacaagt  
tcttttatggttgcaaccgcagaggtgagat-----gagacaacacatttgaatcg-  
tggacatcatacgaataatctccgggttactattgctaccgtgcttaacagactaccagagcctcctacaagtagttgc  
tgacaacttt-  
gagtttgacaattgacatgctatcaactacctactgcagcaaaaactatgggtcagggactaggtcatccatagatggaa  
atcataatcctcaagaataactatttccagtttccatctgcattgtggctgactagctaattttgcttctactcttaagttt  
tgggctcctctgatcttcccaaatatctcctgtattttgatgcagtgcatccgatcacttatcgagttcgggtt  
cgctgccaaagaaagagctgatgtgaggctttattatgggtgatacaagtctgaaatctatgtcataaccaggttggagaaa  
tttcccctatgtactgtatgcaagtcggtgattttgcccggagaagcctttagctcacataaaaagatacataattttctg  
tttggcaggaaggcttagtaactgggagtcactggaatataaataataccagctcttatcacaaccagatgacagctgg  
aaaggtgaacgaggatattgttcaggttaatacaagaaatgctccaccattggtttgtcttattg-----  
-----  
agacatccttctaatacattaatcttgcaggatgctttcttcagaacaagaacatagtaaatccatcttctacaggag  
ccatacttggggaccgaatgaaatgcaggaggtgctgcatggtgtgttcaagactcttttgcataacttactatt  
aagcatgctgagcctatggaaaaatggttctgacttgtgagtcgaactgctactgcatcaaactgtgcatgtaaacac  
ttaagtacta---tatat--  
ttaaatggagacctacatccctaaacttgtaactgtagcatcctagatcaaaatagtcataatgagatctgggtcatc  
atctattagcatgctgaatccctaaacttttctacctctggctctcatgcactcccttctctgacctgcatcaactaac  
cgcaccaccagcttttttc-----  
gtgtggatgcaattatgaattgatgatactgatgacgctctctactttacaggaactcaccttatcccttgtagcagatg  
gtgtctcacgagacaaaactttaacgaactactgaaagcgtatctccggctctctgatgtattttatgaccagttaggcctc  
aacgtgtaaaactttatgcttaggcctggctgtgatgttccagtgatataatgaataaactactgaacttgagacgaggat  
gtaatgttcagtgatataattatgaataa

>Balsas\_INIFAP JSG y LOS 161\_AY107952

gacactccgagctcctcgactcactccccctccccgcaccaaccgctcgcaatggccgccgctcctccgacccccgaggcc  
ctcgatgcctccccgactcgcc---  
ctccgtgcccacctcttctcctcgcctctccgctcccaatgcgcgcgctcccccttactccgcagc-----  
cgcttccgctccttgaccacggcctacgctgtcaagcaggacacggccctctggaccctcgcaccgctcctccgcatcag  
tgctgccaccgacgacggctccgtctccctcatcgccgtcgacctatctgacgccacggacctcgtggactcgtacacga  
accggggccaatacctcctgatccgcgtaccggcgagga-g--  
ctcaagccggcgtacatgggtcatctcctcgccgcctaaagcggggccccgggttcgaattcctcgtcaaaagcgtgccggg  
agctaccgccccgggctctgcgccctccgagacggggatggtgtggagctcggcgccgtcacggggaaggggttcccc  
tcgacaggataaatccgcccagcgtcgcgacagaccgtgctcatcttcgccccggggacggggatcaggtcattctcgtcc  
ctt-  
gtttctctactcaatacatctgtccttatatttactccacataaataaatcatataatctacggacgggtctcttcatatt  
tatttaccgtgctgatgcagcacctcccgatgagccgctgtaattgtgtctggtttaggaagaatgccatcaaacccttc  
ttttcttcattaatcgtttcaaccagccga---  
agaatggacggttggtttgaccatcctagagtgggtatgcttaatacaaaaataagaatggacggttggttaaccatcctcat  
cctggagcagagctagaattagtttcaaccagccgactagctgagctctggtgctgctggaagcagaagccacatctct  
tgctgttccctcattgccatctgcgccgctgcttctgatgattccatttacttctcgtcc-  
agagtcactctctcccgtcagtttctgtgta-----

at ttgtggccactggggtagaagggatgggtcgcagcccccttccaataggggtgtctcgtatctgttgtgggtattatca  
tggcctcacgtgttcttatgcatctgctcaaggttgagtacgtttgaggtctccttgtgtgcatccat ttcacgtagtaa  
taaatcaagaaaaagaaagctttcttaataaaaaatgttttggggctttaaggtcttctccaaat tagcaaactacaagt  
tcttttatgggtgcaaccgcagaggtgagatactgagatgagacaacacatttgaatcg-  
tggacatcatacgaat taattcccggttactattgctaccgtgcctaacagactaccagagcctcctacaagtagttgc  
tgacaacttt-  
gagtttgacaattgacatgctatcaactacctactgcagcaacaaactatgggtcagggactaggtcatccatagatggaa  
atcataatcctcaagaatactat ttcagtttccatctgcattgtggctgactagctaat tttgcttctactcttaagttt  
tgggcctcctctgatctttcccaaattaatctcctgtat ttttgatgagtgagattcgatcacttatcgagttcggttt  
cgctgccaaagaaagagctgatgtgaggctttattatgggtgatacaagtctgaaatctatgtcataccaggttggagaaa  
tttccctatgtactgtatgcaagtcgtgtat tttgcccggagaagcctttagctcacataacaaagatacataat tttctg  
tttggcaggaaggcttagtaactgggagtcactggaat taaaataataaccagctcttatcacaaccagatgacagctgg  
aaaggtgaacgaggatattgttcaggttaatacaagaaatgctccaccattgttttgtcttattg-----

agacatccttctaattgacattaatcttgcaggatgctttcttcagaaacaagaacatagtaaatccatcttctacaggag  
ccatactttgtggaccgaatgaaatgcaggaggtgtgcattgttgttgtttcaagactctttttgcataactttactatt  
aagcatgctgagcctatgacaaaaatgttttgcacttgtgagtcgaactgctactgcatcaaactgtgcatgtaaacac  
ttaagtacta---tatat--  
ttaaataaggagacctacatccctaaacttactaactgtagcatcctagatcaaaat tagtctaattgagatctggctcatc  
atctat ttagcatgctgaatcctaaaacctttctacctctggctctcatgcactcccttctctgacctgcatcaactaac  
cgcaccaccagcttttttc-----  
gtgtggatgcaatgatgaattgatgatactgatgacgctctctactttacaggaactcaccttatcccttgttagcagatg  
gtgtctcacgagacaaaatcttaacgaactactgaaagcgcctcctcggtctctgatgtat tttatgaccagttaggcctc  
aacgtgtaaactttattgtcttaggcctggctgtgatgttccagtgatataatgaataaactactgaacttgagacgaggat  
gtaatgttcagtgatataattatgaataa

>Jalisco\_Benz 967\_AY107952

----ctccga-----  
ctcactccccctccccgccccccaaccgcgtcgcaatggccgcgcgtctccgcagccccgagggcctcgtatgcctccccgact  
cgcc---ctccgtgccacctcttctcctccgcctctccgcctcccaatgcgcgcgcgtccccctactccgcagc-----  
cgcttccgctccttgaccacggcctacgctgtcaagcaggacacggccctctggaccctcgcaccgcctccgcctcag  
tgctgccaccgacgacggctccgtctccctcatcgccgtcgacctatctgacgccacggacctcgtggactcgtacacga  
accggggccaataacctcctgatccgcgtaccggcgagga-g--  
ctcaagcggggtacatgggtcatctcctcgccgcctaaagcggggccccgggttcgaattcctcgtcaaaagcgtgcccggg  
agctaccgccccgggctctgcgccctccgagacggggatgttgtggagctcggcgcgcgtcacggggaaggggttcccc  
tcgacaggataaatccgccccgacgtcgccgagaccgtgctcatcttccggggggggacgggggatcaggtcattctcgtcc  
ctt-  
gtttctctactcaatacatctgtccttatatttactccacataaataaatcatataatctacggacgggtctcttcatatt  
tatttacggtgctgatgcagcacctcccgatgagccgctgtaattgtgtctgtttgttaggaagaatgccatcaaaccttc  
ttttcttcat taatcgttttaaccagccga---  
agaatggacgttgtttgaccatcctagagttgggtatgcttaatcaacaaataagaatggacgttgtttaaccatcctcat  
cctggagcagagctagaattagtttcaaccagccgactagctgagctctgttgcctgctgtgaaagcagaagccacatctct  
tgctgttctcattgccatctgcgcgcgtgcttctgatgattccatttacttctctgce-  
agagtcactctctcccgtcagtttctgtgta-----  
at ttgtggccactggggtagaagggatgggtcgcagcccccttccaataggggtgtctcgtatctgttgtgggtattatca  
tggcctcacgtgttcttatgcatctgctcaaggttgagtacgtttgaggtctccttgtgtgcatccat ttcacgtagtaa  
taaatcaagaaaaagaaagctttcttaataaaaaatgttttggggctttaaggtcttctccaaat tagcaaactacaagt  
tcttttatgggtgcaaccgcagaggtgagat-----gagacatcacatttgaatcg-  
tggacatcatacgaat taattctggttactattgctaccgtgcctaacagactaccagagcctcctacaagtagttgc  
tgacaacttt-  
gagtttgacaattgacatgctatcagctacctactgcagcaacaaactatgggtcagggactaggtcatccatagatggaa  
atcataatcctcaagaatactat ttcagtttccatctgcattgtggctgactagctaat tttgcttctactcttaagttt  
tgggcctcctctgatctttcccaaattaatctcctgtat ttttgatgagtgagattcgatcacttatcgagttcggttt  
cgctgccaaagaaagagctgatgtgaggctttattatgggtgatacaagtctgaaatctatgtcataccaggttggagaaa  
tttccctatgtactgtatgcaagtcgtgtat tttgcccggagaagcctttagctcacataacaaagatacataat tttctg  
tttggcaggaaggcttagtaactgggagtcactggaat taaaataataaccagctcttatcacaaccagatgacagctgg  
aaaggtgaacgaggatattgttcaggttaatacaagaaatgctccaccattgttttgtcttattg-----

-----

agacatccttctaataatgacattaatccttgcaggatgctttcttcagaaacaagaacatagtaaatccatccttctacaggag  
ccatactttgtggaccgaatgaaatgcaggaggtgtgcatgtgtgtgtttcaagactccttttgcataactttactatt  
aagcatgctgagcctatgacaaaaattgtttgcacttgtgagtcgaactgctactgcatcaaactgtgcatgtaaacac  
ttaagtacta---tatat--  
ttaaaatggagacctacatccctaaacttactaactgtagcatcctagatcaaaattagtctaataatgagatctggctcatc  
atctatcttagcatgctgaatcctaaaacctttctacctctggctctcatgcactcccttctctgacctgcatcaactaac  
cgcaccaccagcttttttc-----  
gtgtggatgcaatgatgaattgatgatactgatgacgctctctactttacaggaactcaccttatcccttgtagcagatg  
gtgtctcacgagacaaaaatcctaacgaactactgaaa-  
cgatctccggctctctgatgtatcttatgaccagttaggcctcaacgtgtaaaactttattgcttaggcctggctgtgatgt  
tccagtgatataatgaataaactactgaacttgagacgaggatgtaatgttcagtgatataattatgaataa

>Balsas\_USDA PI566686\_AY107952

----ctccga-----

ctcactccccctccccgcaccaaccgctcgcaatggcgcgctctccgcagccccgaggccctcgatgctccccgact  
cgcc---ctccgtgccacctccttctcctccgctctccgctcccaatgcgcgcgctccccctactccgcagc-----  
cgcttccgctccttgaccacggcctacgctgtcaagcaggacacggccctctggaccctgcaccctctccgccatcag  
tgctgccaccgacgacggctccgctcctcatcgccgtcgacctatctgacgccacggacctcgtggactcgtacacga  
accggggccaatacctcctgatccgcgtaccgggagagga-g--  
ctcaagccggcgtacatggctcatctcctcgccgcctaaagcggggcccggttcgaattcctcgtcaaaagcgtgcccggg  
agctaccgccccgggctctgcgccctccgagacggggatgtgtggagctcggcgcctcacggggaaggggttcccc  
tcgacaggataaatccgcccagcgtcgcgcagaccgtgctcatcttcgcccggggacggggatcaggtcattctcgtcc  
ctt-  
gtttctctactcaatacatctgtccttatatttactccacataaaataaatcatataatctacggacggctctctcatatt  
tatttaccgtgctgatgcagcacctcccgatgagccgctgtaattgtgtctgtttgttaggaagaatgccatcaaaccttc  
ttttcttcattaatcgtttcaaccagccga---  
agaatggacggtgtttgaccatcctagagttggatgcttaatacaaaaataagaatggacggtgtttaaccatcctcat  
cctggagcagagctagaattagtttcaaccagccgactagctgagctctgttgcgtgtggaagcagaagccacatctct  
tgctgttccctcattgccatctgcgccgctgcttctgatgattccatttacttctcgtcc-  
agagtcactctctcccgtcagtttctgtgta-----  
atgtgtggccactggggtagaaggatggcgcagcccccttccaatagggtgtctcgatctgttgtgggtattatca  
tggcctcacgtgttcttatgcatctgctcaagggttgagtagctttgaggtctccttgtgtgcatccatctcacgtagtaa  
taaatcaagaaaaagaaagctttcttaataaaaaatgttttggggctttaaggctcttctccaaattagcaaaactacaagt  
tcttttatgggtgcaaccgcagaggtgagat-----gagacatcacatttgaatcg-  
tggacatcatacgaataatcttctgggttactattgctaccgtgcctaacagactaccagagcctcctacaagtagttgc  
tgacaacttt-

-----

agacatccttctaataatgacattaatccttgcaggatgctttcttcagaaacaagaacatagtaaatccatccttctacaggag  
ccatactttgtggaccgaatgaaatgcaggaggtgtgcatgtgtgtgtttcaagactccttttgcataactttactatt  
aagcatgctgagcctatgacaaaaattgtttgcacttgtgagtcgaactgctactgcatcaaactgtgcatgtaaacac  
ttaagtacta---tatat--  
ttaaaatggagacctacatccctaaacttactaactgtagcatcctagatcaaaattagtctaataatgagatctggctcatc  
atctatcttagcatgctgaatcctaaaacctttctacctctggctctcatgcactcccttctctgacctgcatcaactaac  
cgcaccaccagcttttttc-----  
gtgtggatgcaatgatgaattgatgatactgatgacgctctctactttacaggaactcaccttatcccttgtagcagatg  
gtgtctcacgagacaaaaatcctaacgaactactgaaa-  
cgatctccggctctctgatgtatcttatgaccagttaggcctcaacgtgtaaaactttattgcttaggcctggctgtgatgt  
tccagtgatataatgaataaactactgaacttgagacgaggatgtaatgttcagtgatataattatgaataa

>Balsas\_INIFAP JSG 374\_AY107952

--cactccga-----ctcactccc-

ctccccgcgcccaaccgctcgcaatggccgcgctctccgcagccccgagggccctcgatgcctccccgactcgcc---

ctccgctgccacctcttctcctccgcctctccgctcccaatgcgcgcgctccccttactccgcagc-----

cgcttccgctccttgaccacggcctacgctgtcaagcaggacacggccctctggaccctgcaccgctctccgccatcag

tgctgccaccgacgacggctccgctctccctcatcgccgctcgacctatctgacgccacggacctcgtggactcgtacacga

accgggccaatacctcctgatccgcgtaccgggggagga-g--

ctcaagccggcgtacatggtcatctcctcgccgcctaaagcggggcccccgggttcgaattcctcgtcaaaagcgtgccggg

agctaccggggggcggtctgcgcctccgagacggggatggtgtggagctcggcgccgctcacggggaaggggttcccc

tcgacaggataaatccgcccagcgtcgcgcagaccgctgctcatcttcgcccgggggacggggatcaggtcattctcgtcc

cttagtttctctactcaatacatctgtccttatatttactccacataaataaatcatataatctacggacgggtctcttca

tatttaccgctgctgatgcagcacctcccgatgagccgctgtaattgtgtctggttgtaggaagaatgccatcaaac

cttctttcttcattaatcgtttcaaccagcga---

agaatggacggtgtttgaccatcctagagttggtatgcttaatcaacaaataagaatggacggtgtttaaccatcctcat

cctggagcagagctagaattagtttcaaccagcgaactagctgagctctggtgctgctgtaagcagaagccacatct--

tgctgttctcattgccatctgcgcgcgcttctgatgattccatttacttctgccc-

agagtcactctctcccgctcagtttctgtgta-----

atgtgtggccactggggtagaagggatggtcgcagcccccttccaataggggtgtctcgtatctggtgtggttattatca

tggcctcacggtgttcttatgcatctgctcaaggttgagtacgtttgaggtctccttggtgcatccatttcacgtagtaa

taaatcaagaaaaaagaagcttcttaataaaaaatgttttggggctttaaaggtcttctccaaatagcaaaactacaagt

tcttttatgggtgcaaccgcagaggtgagat-----gagacaacacatttgaatcg-

tggacatcatacgaataaatttctggttactatgtctaccgctgcctaacagactaccagagcctcctacaagtagttgc

tgacaacttt-

gagtttgacaattgacatgctatcagctacctactgcagcaacaaactatgggtcagggactaggtcgtccatagatggaa

atcataatcctcaagaataactatctcagtttccatctgcattgtggctgactagctaatgttcttactcttaagttt

tgggctcctctgatctttcccaaatatctcctgtatgttgatgagctgagattcgatcacttatcgagttcggttt

cgctgccaaagaaagagctgatgtgaggttttattatggtgatacaagctgaaatctatgtcataccaggttggagaaa

tttcccctatgtactgtatgcaagctcgtgtatgtgcccggagaagcctttagctcacataacaaagatacataatttctg

tttggcaggaagggcttagtaactgggagtcactggaatataaataataaccagctcttatcacaaccagatgacagctgg

aaaggtgaacgaggatagttcaggtatacaagaaatgctccaccattggtttgtcttattg-----

-----

agacatccttctaatacattaatcttgcaggatgctttcttcagaaacaagaacatagtaaatccatcttctacaggag

ccatactttgtggaccgaatgaaatgcaggaggtgtgcattgttgtttcaagactctttttgcataactttactatt

aagcatgctgagcctatgacaaaaattgttctgacttgtgagtcgaactgctactgcatcaaacctgtgcatgtaaacac

ttaagtacta---tatat--

ttaaaatggagacctacatccctaaacttactaactgtagcatcctagatcaaaatagttctaatacagatctggctcatc

atctattttagcatgctgaatcctaaaacctttctacctctggctctcatgcactcccttctctgacctgcatcaactaac

cgcaccaccagcttttttc-----

gtgtggatgcaatgatgaattgatgatactgatgacgctctctactttacaggaactcaccttatcccttgtagcagatg

gtgtctcacgagacaaaatctaacgaactactgaaagcagatctccggctctctgatgtatttatgaccagttaggcctc

aacgtgtaaacctttattgcttaggcctggctgtgatgttccagtgatataatgaataaacactgaacttgagacgaggat

gtaatgttcagtgatataattatgaataa

>Jalisco\_INIFAP JSG y MAS 264\_AY107952

gacactccga-----

ctcactcctctccccgcgcccaaccgctcgcaatggccgcgctctccgcagccccgagggccctcgatgcctccccgact

cgcc---ctccgctgccacactcttctcctccgcctctccgctcccaatgcgcgcgctccccttactccgcagc-----

cgctccgctccttgaccacggcctacgctgtcaagcaggacacggccctctggaccctgcaccgctctccgccatcag

tgctgccaccgacgacggctccgctctccctcatcgccgctcgacctatctgacgccacggacctcgtggactcgtacacga

accgggccaatacctcctgatccgcgtaccgggggagga-g--

ctcaagccggcgtacatggtcatctcctcgccgcctaaagcggggcccccgggttcgaattcctcgtcaaaagcgtgccggg

agctaccggggggcggtctgcgcctccgagacggggatggtgtggagctcggcgccgctcacggggaaggggttcccc

tcgacaggataaatccgcccagcgtcgcgcagaccgctgctcatcttcgcccgggggacggggatcaggtcattctcgtcc

ctt-

gtttctctactcaatacatctgtccttatatttactccacataaataaatcatataatctacggacgggtctcttcatatt

tatttaccgctgctgatgcagcacctcccgatgagccgctgtaattgtgtctggttgtaggaagaatgccatcaaaccttc

tttcttcatattaatcgtttcaaccagcga---



-----

ctttagctcacataacaaagatatacaatTTTTctgTTtgacaggaaagactcagtaactgggagtgcaactggaattaaaa  
taataccgggtcttatcacaaccagatgacagttggaaaggtgaacgaggatagctcaggtaatac-----  
cattgttttgtcttattgcaggttcgctggtacacacctgagacatccttttactgacattaatcttgcaggatgctttc  
ttgaaaaacaagaacatagtaaatccatcttctacaggagccatactttgtggaccgaatgaaatgcaggaggtgtgcat  
tgTTgTTgTTTcaagattctttt-  
gcataactttactattaagcatgTTgagactatgagaaaaattgTTTgctacttTgTgagccgaactgctactgcatcaaa  
ccgtgcatgtatacacttaagtactacagtatataattaaaaatggagacttacatccctaaactTgctaaccgtagcatc  
ctagatcaaaattattctaagatgatatctggctcatcatctatTTtagcatgctgaatcctaaaacctttctacctctggct  
ctcatgcaactcccttctctgacctgcatcaactaactgcaccaccctTTTTTTTTTTTTTgTgTggatgcaatgatga  
attgatgatactgatgacgacctgtactTTacaggaagtaccttagccctTgtagcagatggTgTctcagcagacaaaa  
tcttaacgaactactgaaagcgatctccattctctgatgtatTTtatgaccgggttaggcctcaactgtaaaactttattc  
cttaggcctggctgcaatgtTccagtgatataatgaataaactactggactTgagacgaggatgtaatgtTcagtgata--  
ttatatgaataa

>Tripsacum\_WW-2120\_haplotype2\_AY107952

-----  
-----

ctccgcctctccgctcccaatgcgcgcgctgccctccctccgcagccgcctccgcctccgctccttgaccacggcctacg  
ctgtcaagcaggaaacggccctctggaccctgcgcccgtctccgccatcagtgctgccaccgacgacggctccatcttc  
ctcatcgccgtcgacctctccgacgccacggacctcgtggactcgtacacgaaccggggccagtacctctgatccgcgt  
accgggggagga-g--  
ctcaagccggcgtacatggctcatctcctcgccgcctaaagcggggcccccggTtcgagttcctcgtcaaaagcgtgcctgg  
ggccaccgccccggcctctgcgccctccgagacggggatgTtTgTggagctcggcgccgtcacggggaacgggttctccc  
tcgacaggataaatccgcccagc---  
cgcagaccgtgctcatcttcgccccggggacggggatcaggtcattctcatgcccttgtttctctactcaatacgtctgt  
tcttatatttacttcacataaataaatcatataatctacagacagctctcatcaaatTTatttaccgTgctgatgcaacac  
ctcagatgagccgctgtaattTgtgctgtctgttaggaagaatgtcaccaaaacttcttttcttcatTaatcgtttcaac  
cagccgactaagaatggacgTtTgttttaccatcctaaagctggtatactTaatcaacaaataagaatggacgTtTgtttta  
ccatcct-----

agagcagagctagaatcagtttcaagcaactgactagctgagctctgTtTgctgctgtgaagcagaagccacatct--  
cgctgttccctcattgccatctgcgccgctgcttctgatgattccatttacttctgcc-----

-----  
-----

-----caga-----  
-----

ttgtggctgactagctaattttgcttctactcttaacttttgggcctcgtctgatcttgccaaattgatctcctgtatt  
tttgatgcagtgcatcgttccacttTgTcagttcggTttTgTgccaatgaaagatctgatgtgaggctttattatggT  
gatacaagtctgcaatctatggcataaccaggtTggagaaatttcccctatgtactgtatgcaaatcgtg-----

-----

ctttagctcacataacaaagatatacaatTTTTctgTTtgacaggaaagactcagtaactgggagtgcaactggaattaaaa  
taataccgggtcttatcacaaccagatgacagttggaaaggtgaacgaggatagctcaggtaatac-----  
cattgttttgtcttattgcaggttcgctggtacacacctgagacatccttttactgacattaatcttgcaggatgctttc  
ttgaaaaacaagaacatagtaaatccatcttctacaggagccatactttgtggaccgaatgaaatgcaggaggtgtgcat  
tgTtTgTtTcaagattctttt-  
gcataactttactattaagcatgTtTgagactatgagaaaaattgTtTgctacttTgTgagccgaactgctactgcatcaaa  
ccgtgcatgtatacacttaagtactacagtatataattaaaaatggagacttacatccctaaactTgctaaccgtagcatc  
ctagatcaaaattattctaagatgatatctggctcatcatctatTTtagcatgctgaatcctaaaacctttctacctctggct  
ctcatgcaactcccttctctgacctgcatcaactaactgcaccaccctTTTTTTTTTTTTT--  
gtTgTggatgcaatgatgaattgatgatactgatgacgacctctactTTacaggaagtaccttagccctTgtagcagatg  
gtTgTctcagcagacaaaaatcttaacgaactactgaaagcgatctccattctctgatgtatTTtatgaccgggttaggcctc  
aacgtgtaaaactttattccttaggcctggctgcaatgtTccagtgatataatgaataaactactggactTgagacgaggat  
gtaatgtTcagtgata--ttatatgaataa



>Tripsacum\_MIA 34597\_AY107952

-----  
-----  
ctccgcctctccgctcccaatgCGCGCGCTGCCCTCCCTCCGCAGCAGC---  
CGCCTCCGCTCCTTGACCACGGCCTACGCTGTCAAGCAGGAGACGGCCCTCTGGACCCCTGCGCCCGTCTCCGCCATCGG  
TGCTGCCAACGACGACGGCACCCTCCTCATCGCGCTCGACCTCTCCGACGCCACGGACCTCGTGGACTCGTACACGA  
ACCCGGGCCAGTACCTCCTGATCCGCGTACCCTGGGGAGGACGACCTCAAGCCGGCGTACATGGTCTCCTCGCCGCT  
AAAGCGGGGCCCGGTTGAGTTCCTCGTCAAATCCGTGCCGGGGCCACCAGCGGGGCGGCTCTGCTCCTCCGAGACGG  
GGATGTTGTGGAGCTCGGCGCCGTACGGGGAAACGGGTTCCCTCGACAAGATAAATCCGCCGACGCCGCGCAGACCG  
TGCTCATCTTCGCGGGCGGGGACGGGGATCAGGTCACTTCTCATCCCTT-  
GTTTCTGTCTCAATACACCTGTTCTTATATTTACTTACATAAATAAACCATATAATCTACGGACAGTC--  
ATCAAATTTATTTACCCTGATGATGCAGCACCTCCCGATGAGCCGCTGTAATTGTGCCTGTTGTGGAGAAGTGCATC  
ACATCTATTTTCTTCAATTAATCGTTTCAACCAGCTGACTAAGAATGGACGTTGTTTTGCCATCCTAGAGCTGGTATGCT  
TAATCAACAATAAGAATGGACGTTGTTTAAACCATCCT-----  
GGAGCAGAGCTAGAATTAGTTTCAACCAGCCGACTAGCTGAGCTCTGTTGCTGCTGTGAAGCAGAAGCCACATCT--  
TGCTGTTCTCATTGCCATCTGCGCCGCTGCTTCTGATGATTCATTTACTTCTGCTAGATTCCTCCCCCTTCAG  
TTTTGTGTAGGTAGTCACTTGTGGCCACTGGGGTAGAAGGCATGGTGCAGCCCCCTTCCAATAGGGTGTCTCGTATC  
TGTTGTGGTTATTATCATGGCCTCACGTGTTCTTATGCATCTGCTCAAAGTTTAGTACGTTTGAGGTTTCTTGTGTGCA  
TCCATTTACATAGTAATAAATCAAGAAAAAGAAAGTTTTCTTAATAAAAAATG-  
TTTTGGAGCTTTAAGGTCTTCTCCAATTAGCAAACCTACAAGTTCTTTTATGGTTGCAACCGCAGAGGTGAGAT-----  
--  
GAGACAACACATTTGAATCGCTGGACATCATACGAAATTAATTTTTCGGTTACTATTGCTACCCTGCCTAACAGACTACCA  
GAGCCTCCTACAAGTAGTTGCTGACAACTTTTGAGTTTGACAATTGACATGCTATCAACTACCTACTGGAGCAACAACT  
ATGGTCAGGGACTAGGTCACTCATAGATGGAAATCATAATCCTCAAGAATGCTATTTTCAGTTTTCATCTGTATTGTGGCT  
GACTAGCTAATTTGCTTCTACTCTTAAGTTTTGGGCTCCTCTGATCTTCCCAAATTAATCTCCTGTATTTTGTATGC  
AGTGCATTCTGTTCACTTATTGAGTTCCGTTTTGCTGCCAAAGAAAGAGCTGATGTGAGGCTTTATTATGGTGATAAAG  
TCTGAAATCTATGTCATACCAGGTTGGAGAAATCTCCCTATGTACTGAATGCAAATCGTGTATTTGCCGGAGAAGCCTT  
TAGCTCCATAACAAAGATATAACAATTTTTGTTTGACAGGAAAGACTCAGTAACTGGGAGTCAACTGGAATTAATAA  
TACCAGCTTATCACACCAGATGACAGTTGGAAAGGTGAGCAAGGATATGTCAGGTAATAACAAGAAATACTCCGCCAT  
TGTTTTGTCTTATTGCAGGTTGCTGGTACACACCTGAGACATCCTTCTAATGACATTAATCTTGCAAGGATGCTTCTTC  
AGAACAAGAACATAGTAAATCCATCTTCTACAGGAGCCATACTTTGTGGACCGAATGAAATGCAGGAGGTGTGCATGCT  
TGTTGTTTCAAGATTTCTTT-  
GCATAACTTTACTATTAAGCATGTTGAGCCTATGAGAAAAATGTTTGATACTTGTGAGTGAAGTACTGCTACTGCATCAAA  
CCGTGCAT-----AAGTACTA---TATAT--  
TAAAAATGGAGACCTACATCCCTAAACTTGCTAACCGTAGCATCCTAGATCAAAATATTCTAATGATATCTGGCTCATC  
ATCTATTTAGCATGCTGAATCCTAAAACCTTTCTACCTCTGGCTCTCATGCCTCCTTCTCTGATCTGCGTCAACTAAC  
TGCACCCACTTTTTTCT-----  
GTGTGGGTGCAATGATGAATTGATGATACTAATGACGCCATCTACTTTACAGGAACCTCACCTTATCCTTGTAGCAGATG  
GTGCTCACGAGACAAAATCTAACGAACCTACTGAAAGCGATCTCCGGTCT--  
GATGATTTTATGACCAGTTAGGCCTCAACGTGTAACCTTATTCCTTAGGCCTGGCTGTAATGTTCCAGTGATATATGA  
ATAAATACTGAACCTGAGACGAGGATGTAATGTTCCAGTGATA--TTATATGAATAA

>B73\_AY106371

aattaagaacaagagccaattaagtCAGTACCTAAAGGCACACCCTGGAGGCCCTGCTGTTTCAGAGTTTGATTGGGGAA  
CTGGTAGATACCTTGGACTACCATCT--  
GTTATTTCTTTAGATCTTTGGCTCTAATAACAATGTGGATGGCTTTAGAAGTCTTGTCTTCTCCATCTAAAATGCTTTGC  
AAACAGGTGATACCCCAAGGCGTTCTGCTCGTATTAGCGAGAAAGTCAAGGTATTTGATAGCCAGAGGGCGAGAAGATC  
CCGAAGCGCAGCAGGAACCTCCAGTGGTAGGAAGGGTAAGCAGGGGAAGAAGGAAACCCCTGAGACCAGAAGCCAAAGA  
TGCTGAAACTGGCAAGGAGGACAGGAGGCCCCAAGCGAAGATGCCGCAAAGGAGACTGATGTGGAGATGAAGCCTGCTG  
AAGAGGTGAAGGGGGCCTCTGCTGAAACAGAAGATGCTGACATGGCTGATGCTCCTGCACCAGCACCAATGGAAGAAGAT  
AAGAAACAAACTGAAGAAGTGGCAGAAGCTATTGCAGCTCCTCCTGTGCCATCGGAGGAGAAGAAAGA---  
TGTCAAGCCAGCTGAGCCTGAAGCTGCAGCAAGCAACCCAACTGAGGATTCGGCCCTGCTCCTGCTGAACCTGCTGATG  
TTGCTGCTCCAGCTGCTGAGCCCAATCAGACGCCAAACCTGCTGCTGTTGCTGCTCCAGTGCTGAGACCAATCAGAC

gcccagcctgctgctgttgctgctccagcgcctgagaccaaatacagacgctgagcctgctgctgttgctgctccagctcc  
tgagaccaaatacagtagccgagcctgctgctgttgctgctccagcgcctgagaccaaatacagatgccgagcctgctgctg  
ttgctgctccagtgctgctgagaccaaatacagatgccgagcctgctgctgttgctgctccagtgctgctgaaacgaaatacagat  
gctgagcctgctgctgatgctgctccagttcctgagatgaaatacagagtcgagcctgctgctgttgctgctccagcgtc  
tgaaaccaaatacagacgccgagcctgctgcccgttgctgctccagcgcctgagaccaaatacagatgccgagcctgctgctg  
ctgctgctccagtgctgctggaaccaactcagatgctgctgctactgatccagcacctggaaccaagcc---  
cactgccgcccgatccagcacctggagctccagcagagaactccaccgacaaagacggaagccaggagagccagcccgtga  
acaatggacagctgccgcactcgacggtgaagtgcacctgaagccgcaacgcggaacccctgaacccctccggcgcc  
gtgatctcatttaggaacaaacattcgcattcgcattcacattgttatcagttaaaaagtctatggaacggtaagcatg  
ttaattagtcagctctgacgctgctgggtgacaggttggttaattaggtctgcatcttagctgttttgatggctgctgctg  
ccgccatacatgtatcatcttctgtggttgatggtacctaaccgcgtaaacatggttaaccttaggccatgtattaatt  
actccgctctaattggttgatgctgattgtcaaaccttgacagaaccagttgcatgcatgaaaaataat

>Mo17\_AY106371

aattaagaacaagaggcaattaagtcagtagcctaaaggcacaccctggaggccctgctgtttcagagtttgattggggaa  
ctggtagatacctttgactaccattct--  
gttatttcttttagatctttggctctaatacaaatgtggatggcttttagaagtcttgtcttctccatctaaaatgctttgc  
aaacaggtgataccccaaggcgttctgctcgtattagcagagaaagtcaaggatattgatagccagagggcgagaagatc  
ccgaagcgcagcaggaactccagtggttaggaagggtaagcaggggaagaaggaaacccctgagaccgaagaagccaaaga  
tgctgaaactggcaaggaggcagaggaggccccaagcgaagatgccgcaaaggagactgatgtggagatgaagcctgctg  
aagaggtgaagggggcctctgctgaaacagaagatgctgacatggctgatgctcctgcaccagcaccaatggaagaagat  
aagaacaaaactgaagaactggcagaagctattgcagctcctcctgtgccatcggaggagaagaaga---  
tgtcaagccagctgagcctgaagctgcagcaagcaaccactgaggattcggcccctgctcctgctgaacctgctgatg  
ttgctgctccagctgctgagaccaaatacagacgccaaacctgctgctgttgctgctccagtgctgctgagaccaaatacagac  
gccgagcctgctgctgttgctgctccagcgcctgagaccaaatacagacgctgagcctgctgctgttgctgctccagctcc  
tgagaccaaatacagtagccgagcctgctgctgttgctgctccagcgcctgagaccaaatacagatgccgagcctgctgctg  
ttgctgctccagtgctgctgagaccaaatacagatgccgagcctgctgctgttgctgctccagtgctgctgaaacgaaatacagat  
gctgagcctgctgctgatgctgctccagttcctgagatgaaatacagagtcgagcctgctgctgttgctgctccagcgtc  
tgaaaccaaatacagacgccgagcctgctgcccgttgctgctccagcgcctgagaccaaatacagatgccgagcctgctgctg  
ctgctgctccagtgctgctggaaccaactcagatgctgctgctactgatccagcacctggaaccaagcc---  
cactgccgcccgatccagcacctggagctccagcagagaactccaccgacaaagacggaagccaggagagccagcccgtga  
acaatggacagctgccgcactcgacggtgaagtgcacctgaagccgcaacgcggaacccctgaacccctccggcgcc  
gtgatctcatttaggaacaaacattcgcattcgcattcacattgttatcagttaaaaagtctatggaacggtaagcatg  
ttaattagtcagctctgacgctgctgggtgacaggttggttaattaggtctgcatcttagctgttttgatggctgctgctg  
ccgccatacatgtatcatcttctgtggttgatggtacctaaccgcgtaaacatggttaaccttaggccatgtattaatt  
actccgctctaattggttgatgctgattgtcaaaccttgacagaaccagttgcatgcatgaaaaataat

>Ky21\_AY106371

aattaagaacaagaggcaattaagtcagtagcctaaaggcacaccctggaggccctgctgtttcagagtttgattggggaa  
ctggtagatacctttgactaccattct--  
gttatttcttttagatctttggctctaatacaaatgtggatggcttttagaagtcttgtcttctccatctaaaatgctttgc  
aaacaggtgataccccaaggcgttctgctcgtattagcagagaaagtcaaggatattgatagccagagggcgagaagatc  
ccgaagcgcagcaggaactccagtggttaggaagggtaagcaggggaagaaggaaacccctgagaccgaagaagccaaaga  
tgctgaaactggcaaggaggcagaggaggccccaagcgaagatgccgcaaaggagactgatgtggagatgaagcctgctg  
aagaggtgaagggggcctctgctgaaacagaagatgctgacatggctgatgctcctgcaccagcaccaatggaagaagat  
aagaacaaaactgaagaactggcagaagctattgcagctcctcctgtgccatcggaggagaagaaga---  
tgtcaagccagctgagcctgaagctgcagcaagcaaccactgaggattcggcccctgctcctgctgaacctgctgatg  
ttgctgctccagctgctgagaccaaatacagacgccaaacctgctgctgttgctgctccagtgctgctgagaccaaatacagac  
gccgagcctgctgctgttgctgctccagcgcctgagaccaaatacagacgctgagcctgctgctgttgctgctccagctcc  
tgagaccaaatacagtagccgagcctgctgctgttgctgctccagcgcct-----  
-----  
gagaccaaatacagatgccgagcctgctgctgttgctgctccagtgctgaaacgaaatacagatgctgagcctgctgctga  
tgctgctccagttcctgagatgaaatacagagtcgagcctgctgctgttgctgctccagcgtctgaaaccaaatacagacg  
ccgagcctgctgcccgttgctgctccagcgcctgagaccaaatacagatgccgagcctgctgctgctgctgctccagtgct  
ggaaccaactcagatgctgctgctactgatccagcacctggaaccaagcc---  
cactgccgcccgatccagcacctggagctccagcagagaactccaccgacaaagacggaagccaggagagccagcccgtga  
acaatggacagctgccgcactcgacggtgaagtgcacctgaagccgcaacgcggaacccctgaacccctccggcgcc

gtgtatctcatttaggaacaaacatttcgcatctcgcatctcacattggttatcagttaaaaagtctatggaacggtaagcatg  
ttaattagtcagtcctgacgctgctgggtgacaggttggttaattaggctctgcatttagctgttttgatggctgctgtcg  
ccgccatacatgtatcatcttcttgtgggttgatggtacctaaccgcgtaaacatgtaaccttaggccatgtattaatt  
actccgctctaattggttgatgtgtattgtcaaacttgcagaaccagttgcatgcatgaaaaataat

>IL14H\_AY106371

-----

gaggcaattaagtcagtacctaagggcacaccctggaggccctgctgtttcagagtttgattggggaactggtagataacc  
tttgactaccattct--

gttatttcttttagatctttggctctaatacaaatgtggatggcttttagaagtcttgtcttctccatctaaaatgctttgc  
aaacaggtgataccccaagggcgttctgctcgtattagcgagaaagtcaaggtatttgatagccagagggcgagaagatc  
ccgaagcgcagcaggaactccagtggttaggaagggtaagcaggggaagaaggaaaccctgagaccgaagaagccaaaga  
tgctgaaactggcaaggaggcagaggaggcccaagcgaagatgcccgaaggagactgatgtggagatgaagcctgctg  
aagaggtgaagggggcctctgctgaaacagaagatgctgacatggctgatgctcctgcaccagcaccaatggaagaagat  
aagaaacaaactgaagaactggcagaagctattgcagctcctcctgtgccatcggaggagaagaaaga---

tgtcaagccagctgagcctgaagctgcagcaagcaaccaaactgaggattcggcccctgctcctgctgaacctgctgatg  
ttgctgctccagctgctgagaccaaactcagacgccaaacctgctgctggtgctgctccagtgctgagaccaaactcagac  
gccgagcctgctgctggtgctgctccagcgcctgagaccaaactcagacgctgagcctgctgctggtgctgctccagctcc  
tgagaccaaactcagtagccgagcctgctgctggtgctgctccagcgcct-----

-----

gagaccaaactcagatgccgagcctgctgctggtgctgctccagtgctgaaacgaaattagatgctgagcctgctgctga  
tgctgctccagttcctgagatgaaatcagagtcagagcctgctgctggtgctgctccagcgtctgaaaccaaactcagacg  
ccgagcctgctgcccgttgctgctccagcgcctgagaccaaactcagatgccgagcctgctgctgctgctgctccagtgct  
ggaaccaactcagatgctgctgctactgatccagcacctggaaccaaggg---

cactgccgcccgatccagcacctggagctccagcagagaactccaccgacaaagacggaagccaggagagccagcccgtga  
acaatggacagctgccgcactcgacggtgaagtgacactgaagccgcaacgcggaaaaacctgaacccttccggcgcc  
gtgtatctcatttaggaacaaacatttcgcatctcgcatctcacattggttatcagttaaaaagtctatggaacggtaagcatg  
ttaattagtcagtcctgacgctgctgggtgacaggttggttaattaggctctgcatttagctgttttgatggctgctgtcg  
ccgccatacatgtatcatcttcttgtgggttgatggtacctaaccgcgtaaacatgtaaccttaggccatgtattaatt  
actccgctctaattggttgatgtgtattgtcaaacttgcagaaccagttgcatgcatgaaaaataat

>CML322\_AY106371

aattaagaacaagaggcaattaagtcagtacctaaggtacaccctggaggccctgctgtttcagagtttgattggggaa  
ctggtagatacctttgactaccattct--

gttatttcttttagatctttggctctaatacaaatgtggatggcttttagaagtcttgtcttctccatctaaaatgctttgc  
aaacaggtgataccccaagggcgttctgctcgtattagcgagaaagtcaaggtatttgatagccagagggcgagaagatc  
ccgaagcgcagcaggaactccagtggttaggaagggtaagcaggggaagaaggaaaccctgagaccgaagaagccaaaga  
tgctgaaactggcaaggaggcagaggaggcccaagcgaagatgcccgaaggagactgatgtggagatgaagcctgctg  
aagaggtgaagggggcctctgctgaaacagaagatgctgacatggctgatgctcctgcaccagcaccaatggaagaagat  
aagaaacaaactgaagaactggcagaagctattgcagctcctcctgtgccatcggaggagaagaaaga---

tgtcaagccagctgagcctgaagctgcagcaagcaaccaaactgaggattcggcccctgctcctgctgaacctgctgatg  
ttgctgctccagctgctgagaccaaactcagacgccaaacctgctgctggtgctgctccagtgctgagaccaaactcagac  
gccgagcctgctgctggtgctgctccagcgcctgagaccaaactcagacgctgagcctgctgctggtgctgctccagctcc  
tgagaccaaactcagtagccgagcctgctgctggtgctgctccagcgcct-----

-----

gagaccaaactcagatgccgagcctgctgctggtgctgctccagtgctgaaacgaaattagatgctgagcctgctgctga  
tgctgctccagttcctgagatgaaatcagagtcagagcctgctgctggtgctgctccagcgtctgaaaccaaactcagacg  
ccgagcctgctgcccgttgctgctccagcgcctgagaccaaactcagatgccgagcctgctgctgctgctgctccagtgct  
ggaaccaactcagatgctgctgctactgatccagcacctggaaccaaggg---

cactgccgcccgatccagcacctggagctccagcagagaactccaccgacaaagacggaagccaggagagccagcccgtga  
acaatggacagctgccgcactcgacggtgaagtgacactgaagccgcaacgcggaaaaacctgaacccttccggcgcc  
gtgtatctcatttaggaacaaacatttcgcatctcgcatctcacattggttatcagttaaaaagtctatggaacggtaagcatg  
ttaattagtcagtcctgacgctgctgggtgacaggttggttaattaggctctgcatttagctgttttgatggctgctgtcg  
ccgccatacatgtatcatcttcttgtgggttgatggtacctaaccgcgtaaacatgtaaccttaggccatgtattaatt  
actccgctctaattggttgatgtgtattgtcaaacttgcagaaccagttgcatgcatgaaaaataat

>M37W\_AY106371

aattaagaacaagaggcaattaagt cagtacctaagggcacaccctggaggccctgctgtttcagagtttgattggggaa  
ctggtagatacctttgactaccattct--  
gttatttcttttagatcctttggctctaatacaaatgtggatggcttttagaagtcttgtcttctccatctaaaatgctttgc  
aaacaggtgataccccaagggcgttctgctcgtattagcgagaaagtcaaggtatttgatagccagagggcgagaagatc  
ccgaagcgcagcaggaactccagtggttaggaagggtaagcaggggaagaaggaaaccctgagaccgaagaagccaaaga  
tgctgaaactggcaaggaggcagaggaggccccaagcgaagatgccgcaaaggagactgatgtggagatgaagcctgctg  
aagaggtgaagggggcctctgctgaaacagaagatgctgacatggctgatgctcctgcaccagcaccaatggaagaagat  
aagaaacaaactgaagaactggcagaagctattgcagctcctcctgtgccatcggaggagaagaaaga---  
tgtcaagccagctgagcctgaagctgcagcaagcaaccaaactgaggattcggccctgctcctgctgaacctgctgatg  
ttgctgctccagctgctgagaccaaactcagacgccaaacctgctgctgttgctgctccagtgctgagaccaaactcagac  
gccgagcctgctgctgttgctgctccagcgcctgagaccaaactcagacgctgagcctgctgctgttgctgctccagctcc  
tgagaccaaactcagtagccgagcctgctgctgttgctgctccagcgcct-----  
-----  
gagaccaaactcagatgccgagcctgctgctgttgctgctccagtgctgaaacgaaattagatgctgagcctgctgctga  
tgctgctccagttcctgagatgaaatcagagtcgagcctgctgctgttgctgctccagcgtctgaaaccaaactcagacg  
ccgagcctgctgccgttgctgctccagcgcctgagaccaaactcagatgccgagcctgctgctgctgctccagtgct  
ggaaccaactcagatgctgctgctactgatccagcacctggaaccaagggc---  
cactgccgccgatccagcacctggagctccagcagagaactccaccgacaaagacggaagccaggagagccagcccgtga  
acaatggacagctgccgcactcgacggtagagtgacactgaagccgcaacgcggaaaaacctgaacctctccggcgcc  
gtgtatctcatttaggaacaaacattcgcattcgcattcacattgttatcagttaaaaagtctatggaacggtaagcatg  
ttaattagtcagctctgacgctgctgggtgacaggttggtaattaggctctgcatttagctgttttgatggctgctgtcg  
ccgccatacatgtatcatcttcttggttggtatggtacctaaccgcgtaaacatgtaaccttaggccatgtattaatt  
actccgctctaattgtttgtatgtgtattgtcaaaccttgacagaaccagttgcatgcatgaaaaataat

>KUI11\_AY106371

aattaagaacaagaggcaattaagt cagtacctaagggcacaccctggaggccctgctgtttcagagtttgattggggaa  
ctggtagatacctttgactaccattct--  
gttatttcttttagatcctttggctctaatacaaatgtggatggcttttagaagtcttgtcttctccatctaaaatgctttgc  
aaacaggtgataccccaagggcgttctgctcgtattagcgagaaagtcaaggtatttgatagccagagggcgagaagatc  
ccgaagcgcagcaggaactccagtggttaggaagggtaagcaggggaagaaggaaaccctgagaccgaagaagccaaaga  
tgctgaaactggcaaggaggcagaggaggccccaagcgaagatgccgcaaaggagactgatgtggagatgaagcctgctg  
aagaggtgaagggggcctctgctgaaacagaagatgctgacatggctgatgctcctgcaccagcaccaatggaagaagat  
aagaaacaaactgaagaactggcagaagctattgcagctcctcctgtgccatcggaggagaagaaaga---  
tgtcaagccagctgagcctgaagctgcagcaagcaaccaaactgaggattcggccctgctcctgctgaacctgctgatg  
ttgctgctccagctgctgagaccaaactcagacgccaaacctgctgctgttgctgctccagtgctgagaccaaactcagac  
gccgagcctgctgctgttgctgctccagcgcctgagaccaaactcagacgctgagcctgctgctgttgctgctccagctcc  
tgagaccaaactcagtagccgagcctgctgctgttgctgctccagcgcct-----  
-----  
gagaccaaactcagatgccgagcctgctgctgttgctgctccagtgctgaaacgaaattagatgctgagcctgctgctga  
tgctgctccagttcctgagatgaaatcagagtcgagcctgctgctgttgctgctccagcgtctgaaaccaaactcagacg  
ccgagcctgctgccgttgctgctccagcgcctgagaccaaactcagatgccgagcctgctgctgctgctccagtgct  
ggaaccaactcagatgctgctgctactgatccagcacctggaaccaagggc---  
cactgccgccgatccagcacctggagctccagcagagaactccaccgacaaagacggaagccaggagagccagcccgtga  
acaatggacagctgccgcactcgacggtagagtgacactgaagccgcaacgcggaaaaacctgaacctctccggcgcc  
gtgtatctcatttaggaacaaacattcgcattcgcattcacattgttatcagttaaaaagtctatggaacggtaagcatg  
ttaattagtcagctctgacgctgctgggtgacaggttggtaattaggctctgcatttagctgttttgatggctgctgtcg  
ccgccatacatgtatcatcttcttggttggtatggtacctaaccgcgtaaacatgtaaccttaggccatgtattaatt  
actccgctctaattgtttgtatgtgtattgtca-----

>KUI3\_AY106371

-----  
gaggcaattaagt cagtacctaagggcacaccctggaggccctgctgtttcagagtttgattggggaaactggtagatacc  
ttgactaccattct--  
gttatttcttttagatcctttggctctaatacaaatgtggatggcttttagaagtcttgtcttctccatctaaaatgctttgc  
aaacaggtgataccccaagggcgttctgctcgtattagcgagaaagtcaaggtatttgatagccagagggcgagaagatc  
ccgaagcgcagcaggaactccagtggttaggaagggtaagcaggggaagaaggaaaccctgagaccgaagaagccaaaga  
tgctgaaactggcaaggaggcagaggaggccccaagcgaagatgccgcaaaggagactgatgtggagatgaagcctgctg

aagaggtgaaggggctctgctgaaacagaagatgctgacatggctgatgctcctgcaccagcaccaatggaagaagat  
aagaaacaaactgaagaactggcagaagctattgcagctcctcctgtgccatcggaggagaagaaaga---  
tgtcaagccagctgagcctgaagctgcagcaagcaaccaaactgaggattcggccctgctcctgctgaacctgctgatg  
ttgctgctccagctgctgagaccaaactcagacgcacaaacctgctgctggtgctgctccagtgctgagaccaaactcagac  
gccgagcctgctgctggtgctgctccagcgcctgagaccaaactcagacgctgagcctgctgctggtgctgctccagctcc  
tgagaccaaactcagtagccgagcctgctgctggtgctgctccagcgcct-----  
-----

gagaccaaactcagatgccgagcctgctgctggtgctgctccagtgctgaaacgaaatcagatgctgagcctgctgctga  
tgctgctccagttcctgagatgaaatcagagtcgagcctgctgctggtgctgctccagcgtctgaaaccaaactcagacg  
ccgagcctgctgccgttctgctgctccagcgcctgagaccaaactcagatgccgagcctgctgctgctgctgctccagtgct  
ggaaccaaactcagatgctgctgctactgatccagcacctggaaccaaggc---  
cactgccgccgatccagcacctggagctccagcagagaactccaccgacaaagacggaagccaggagagccagcccgatga  
acaatggacagctgccgactcgacggtgaagtgcacctgaagccgcaacgcccggaaaaacctgaaccccttccggcgcc  
gtgtatctcatttaggaacaaactcgcattcgcattcacattggtatcagttaaaaagtctatggaacggtaagcatg  
ttaattagtcagctctgacgctgctgggtgacaggttggttaattaggctctgcatttagctgttttgatggctgctgctg  
ccgccatacatgtatcatcttcttgggttgatggtacctaaccgctaaacatgtaaccttaggccatgtattaatt  
actccgctctaattggttgatggtattgtcaaaccttgacagaaccagttgcatgcatgaaaaataat

>NC350\_AY106371

aattaagaacaagaggcaattaagtcagtagcctaagggcacaccctggaggccctgctggttccagagtttgattggggaa  
ctggtagatacctttgactaccattct--  
gttatttcttttagatctttggctctaatacaaatgtggatggctttagaagtcctgtcttctccatctaaaatgctttgc  
aaacaggtgataccccaaggcgttctgctcgtattagcgagaaagtcaaggtatttgatagccagagggcgagaagatc  
ccgaagcgcagcaggaactccagtggttaggaagggtaagcaggggaagaaggaaacccctgagaccgaagaagccaaaga  
tgctgaaactggcaaggaggcagaggaggccccaagcgaagatgccgcaaaggagactgatgtggagatgaagcctgctg  
aagaggtgaaggggctctgctgaaacagaagatgctgacatggctgatgctcctgcaccagcaccaatggaagaagat  
aagaaacaaactgaagaactggcagaagctattgcagctcctcctgtgccatcggaggagaagaaaga---  
tgtcaagccagctgagcctgaagctgcagcaagcaaccaaactgaggattcggccctgctcctgctgaacctgctgatg  
ttgctgctccagctgctgagaccaaactcagacgcacaaacctgctgctggtgctgctccagtgctgagaccaaactcagac  
gccgagcctgctgctggtgctgctccagcgcctgagaccaaactcagacgctgagcctgctgctgctccagctcc  
tgagaccaaactcagtagccgagcctgctgctggtgctgctccagcgcctgagaccaaactcagatgccgagcctgctgctg  
ttgctgctccagtgctgagaccaaactcagatgccgagcctgctgctggtgctgctccagtgctgaaacgaaatcagat  
gctgagcctgctgctgatgctgctccagttcctgagatgaaatcagagtcgagcctgctgctggtgctgctccagcgtc  
tgaaaccaaactcagacgcgagcctgctgctggtgctgctccagcgcctgagaccaaactcagatgccgagcctgctgctg  
ctgctgctccagtgctggaaccaaactcagatgctgctgctactgatccagcacctggaaccaaggc---  
cactgccgccgatccagcacctggagctccagcagagaactccaccgacaaagacggaagccaggagagccagcccgatga  
acaatggacagctgccgactcgacggtgaagtgcacctgaagccgcaacgcccggaaaaacctgaaccccttccggcgcc  
gtgtatctcatttaggaacaaactcgcattcgcattcacattggtatcagttaaaaagtctatggaacggtaagcatg  
ttaattagtcagctctgacgctgctgggtgacaggttggttaattaggctctgcatttagctgttttgatggctgctgctg  
ccgccatacatgtatcatcttcttgggttgatggtacctaaccgctaaacatgtaaccttaggccatgtattaatt  
actccgctctaattggttgatggtattgtcaaaccttgacagaaccagttgcatgcatgaaaaataat

>HP301\_AY106371

aattaagaacaagaggcaattaagtcagtagcctaagggcacaccctggaggccctgctggttccagagtttgattggggaa  
ctggtagatacctttgactaccattct--  
gttatttcttttagatctttggctctaatacaaatgtggatggctttagaagtcctgtcttctccatctaaaatgctttgc  
aaacaggtgataccccaaggcgttctgctcgtattagcgagaaagtcaaggtatttgatagccagagggcgagaagatc  
ccgaagcgcagcaggaactccagtggttaggaagggtaagcaggggaagaaggaaacccctgagaccgaagaagccaaaga  
tgctgaaactggcaaggaggcagaggaggccccaagcgaagatgccgcaaaggagactgatgtggagatgaagcctgctg  
aagaggtgaaggggctctgctgaaacagaagatgctgacatggctgatgctcctgcaccagcaccaatggaagaagat  
aagaaacaaactgaagaactggcagaagctattgcagctcctcctgtgccatcggaggagaagaaaga---  
tgtcaagccagctgagcctgaagctgcagcaagcaaccaaactgaggattcggccctgctcctgctgaacctgctgatg  
ttgctgctccagctgctgagaccaaactcagacgcacaaacctgctgctggtgctgctccagtgctgagaccaaactcagac  
gccgagcctgctgctggtgctgctccagcgcctgagaccaaactcagacgctgagcctgctgctggtgctgctccagctcc  
tgagaccaaactcagtagccgagcctgctgctggtgctgctccagcgcct-----  
-----

gagaccaaactcagatgccgagcctgctgctggtgctgctccagtgctgaaacgaaattagatgctgagcctgctgctga



ccgccatacatgtatcatcttcttgtgggttgtatggtacctaaccgcgtaaacatgttaaccttaggccatgtattaatt  
actccgctctaattgtttgtatgtgtattgtcaaacttgcagaaccagttgcatgcatgaaaaataat

>Oh43\_AY106371

aattaagaacaagaggcaattaagtcagtacctaaggcacaccctggaggccctgctgtttcagagtttgattggggaa  
ctggtagatacctttgactaccattct--  
gttatttcttttagatctttggctctaatacaaatgtggatggctttagaagtcttgtcttctccatctaaaatgctttgc  
aaacaggtgataccccaaggcgttctgctcgtattagcagagaaagtcaaggatattgatagccagagggcgagaagatc  
ccgaagcgcagcaggaactccagtggttaggaagggtaagcaggggaagaaggaaaccctgagaccgaagaagccaaaga  
tgctgaaactggcaaggaggcagaggaggccccaagcgaagatgccgcaaaggagactgatgtggagatgaagcctgctg  
aagaggtgaagggggcctctgctgaaacagaagatgctgacatggctgatgctcctgcaccagcaccaatggaagaagat  
aagaacaaaactgaagaactggcagaagctattgcagctcctcctgtgccatcggaggagaagaaga---  
tgtcaagccagctgagcctgaagctgcagcaagcaaccaaactgaggattcggccctgctcctgctgaacctgctgatg  
ttgctgctccagctgctgagaccaaactcagacgccaaactgctgctggtgctgctccagtgctgagaccaaactcagac  
gccgagcctgctgctggtgctgctccagcgcctgagaccaaactcagacgctgagcctgctgctggtgctgctccagctcc  
tgagaccaaactcagtagccgagcctgctgctggtgctgctccagcgcct-----  
-----

gagaccaaactcagatgccgagcctgctgctggtgctgctccagtgctgaaacgaaattagatgctgagcctgctgctga  
tgctgctccagttcctgagatgaaatcagagtcagcgcctgctgctggtgctgctccagcgtctgaaaccaaactcagacg  
ccgagcctgctgccgttctgctgctccagcgcctgagaccaaactcagatgccgagcctgctgctgctgctgctccagtgct  
ggaaccaactcagatgctgctgctactgatccagcacctggaaccaaggc---  
cactgccgccgatccagcacctggagctccagcagagaactccaccgacaaagacggaagccaggagagccagcccgtga  
acaatggacagctgccgcactcgacggtgaagtgcacctgaagccgcaacgcggaaaaacctgaacccttccggcgcc  
gtgtatctcatttaggaacaaacattcgcattcgcattcacattgttatcagttaaaaagtctatggaacggtaagcatg  
ttaattagtcagctctgacgctgctgggtgacaggttggttaattaggtctgcatcttagctgttttgtatggctgctgctg  
ccgccatacatgtatcatcttcttgtgggttgtatggtacctaaccgcgtaaacatgttaaccttaggccatgtattaatt  
actccgctctaattgtttgtatgtgtattgtcaaacttgcagaaccagttgcatgcatgaaaaataat

>CML333\_AY106371

-----  
gaggcaattaagtcagtacctaaggcacaccctggaggccctgctgtttcagagtttgattggggaaactggttagatacc  
tttgactaccattct--  
gttatttcttttagatctttggctctaatacaaatgtggatggctttagaagtcttgtcttctccatctaaaatgctttgc  
aaacaggtgataccccaaggcgttctgctcgtattagcagagaaagtcaaggatattgatagccagagggcgagaagatc  
ccgaagcgcagcaggaactccagtggttaggaagggtaagcaggggaagaaggaaaccctgagaccgaagaagccaaaga  
tgctgaaactggcaaggaggcagaggaggccccaagcgaagatgccgcaaaggagactgatgtggagatgaagcctgctg  
aagaggtgaagggggcctctgctgaaacagaagatgctgacatggctgatgctcctgcaccagcaccaatggaagaagat  
aagaacaaaactgaagaactggcagaagctattgcagctcctcctgtgccatcggaggagaagaaga---  
tgtcaagccagctgagcctgaagctgcagcaagcaaccaaactgaggattcggccctgctcctgctgaacctgctgatg  
ttgctgctccagctgctgagaccaaactcagacgccaaactgctgctggtgctgctccagtgctgagaccaaactcagac  
gccgagcctgctgctggtgctgctccagcgcctgagaccaaactcagacgctgagcctgctgctggtgctgctccagctcc  
tgagaccaaactcagtagccgagcctgctgctggtgctgctccagcgcct-----  
-----

gagaccaaactcagatgccgagcctgctgctggtgctgctccagtgctgaaacgaaattagatgctgagcctgctgctga  
tgctgctccagttcctgagatgaaatcagagtcagcgcctgctgctggtgctgctccagcgtctgaaaccaaactcagacg  
ccgagcctgctgccgttctgctgctccagcgcctgagaccaaactcagatgccgagcctgctgctgctgctgctccagtgct  
ggaaccaactcagatgctgctgctactgatccagcacctggaaccaaggc---  
cactgccgccgatccagcacctggagctccagcagagaactccaccgacaaagacggaagccaggagagccagcccgtga  
acaatggacagctgccgcactcgacggtgaagtgcacctgaagccgcaacgcggaaaaacctgaacccttccggcgcc  
gtgtatctcatttaggaacaaacattcgcattcgcattcacattgttatcagttaaaaagtctatggaacggtaagcatg  
ttaattagtcagctctgacgctgctgggtgacaggttggttaattaggtctgcatcttagctgttttgtatggctgctgctg  
ccgccatacatgtatcatcttcttgtgggttgtatggtacctaaccgcgtaaacatgttaaccttaggccatgtattaatt  
actccgctctaattgtttgtatgtgtattgtcaaacttgcagaaccagttgcatgcatgaaaaataat

>Balsas\_Kato Site 4\_AY106371

aattaagaacaagaggcaattaagtcagtacctaaggcacaccctggaggccctgctgtttcagagtttgattggggaa  
ctggttagatacctttgactaccattct--

gttatttcttttagatctttggctctaatacaaatgtggatggcttttagaagtcttgtcttctccatctaaaatgctttgc  
aaacaggtgataccccaaggcgttctgctcgtattagcagagaaagtcaaggtatttgatagccagagggcgagaagatc  
ccgaagcgcagcaggaactccagtggttaggaagggtaagcaggggaagaaggaaaccctgagaccgaagaagccaaaga  
tgctgaaactggcaaggaggcagaggaggccccaagcgaagatgccgcaaaggagactgatgtggagatgaagcctgctg  
aagaggtgaagggggcctctgctgaaacagaagatgctgacatggctgatgctcctgcaccagcaccaatggaagaagat  
aagaaacaaactgaagaactggcagaagctattgcagctcctcctgtgccatcggaggagaagaaaga---  
tgtcaagccagctgagcctgaagctgcagcaagcaaccactgaggattcggcccctgctcctgctgaacctgctgatg  
ttgctgctccagctgctgagaccaaactcagacgccaaacctgctgctggtgctgctccagtgctgagaccaaactcagac  
gccgagcctgctgctggtgctgctccagcgcctgagaccaaactcagacgctgagcctgctgctggtgctgctccagctcc  
tgagaccaaactcagtagccgagcctgctgctggtgctgctccagcgcct-----

gagaccaaactcagatgccgagcctgctgctggtgctgctccagtgctgaaacgaaatcagatgctgagcctgctggtga  
tgctgctccagttcctgagatgaaatcagagtcagcgcctgctgctggtgctgctccagcgtctgaaaccaaactcagacg  
ccgagcctgctgccgttgctgctccagcgcctgagaccaaactcagatgccgagcctgctgctgctgctgctccagtgct  
ggaaccaactcagatgctgctgctactgatccagcacctggaaccaaggc---  
cactgccgccgatccagcacctggagctccagcagagaactccaccgacaaagacggaagccaggagagccagcccgtga  
acaatggacagctgccgcactcgacggtgaagtgacactgaagccgcaacgcggaaaaacctgaacccatccggcgcc  
gtgtatctcatttaggaacaaacattcgcattcgcattcacattgttatcagttaaaaagtctatggaacggtaagcatg  
ttaattagtcagctctgacgctgctgggtgacaggttggttaattaggctctgcatttagctgttttgatggctgctgctg  
ccgccatacatgtatcatcttcttgtggttgatggtaacctaacccgctaacaatggttaaccttaggccatgtattaatt  
actccgctctaattgtttgtatgtgtattgtcaaacttgcagaaccagttgcatgcatgaaaaataat

>Balsas\_USDA PI566686\_AY106371

aattaagaacaagaggcaattaagtcagtagcctaaaggcacaccctggaggccctgctgtttcagagtttgattggggaa  
ctggttagatacctttgactaccattct--  
gttatttcttttagatctttggctctaatacaaatgtggatggcttttagaagtcttgtcttctccatctaaaatgctttgc  
aaacaggtgataccccaaggcgttctgctcgtattagcagagaaagtcaaggtatttgatagccagagggcgagaagatc  
ccgaagcgcagcaggaactccagtggttaggaagggtaagcaggggaagaaggaaaccctgagaccgaagaagccaaaga  
tgctgaaactggcaaggaggcagaggaggccccaagcgaagatgccgcaaaggagactgatgtggagatgaagcctgctg  
aagaggtgaagggggcctctgctgaaacagaagatgctgacatggctgatgctcctgcaccagcaccaatggaagaagat  
aagaaacaaactgaagaactggcagaagctattgcagctcctcctgtgccatcggaggagaagaaaga---  
tgtcaagccagctgagcctgaagctgcagcaagcaaccactgaggattcggcccctgctcctgctgaacctgctgatg  
ttgctgctccagctgctgagaccaaactcagacgccaaacctgctgctggtgctgctccagtgctgagaccaaactcagac  
gccgagcctgctgctggtgctgctccagcgcctgagaccaaactcagacgctgagcctgctgctggtgctgctccagctcc  
tgagaccaaactcagtagccgagcctgctgctggtgctgctccagcgcct-----

gagaccaaactcagatgccgagcctgctgctggtgctgctccagtgctgaaacgaaatcagatgctgagcctgctgctga  
tgctgctccagttcctgagatgaaatcagagtcagcgcctgctgctggtgctgctccagcgtctgaaaccaaactcagacg  
ccgagcctgctgccgttgctgctccagcgcctgagaccaaactcagatgccgagcctgctgctgctgctgctccagtgct  
ggaaccaactcagatgctgctgctactgatccagcacctggaaccaaggc---  
cactgccgccgatccagcacctggagctccagcagagaactccaccgacaaagacggaagccaggagagccagcccgtga  
acaatggacagctgccgcactcgacggtgaagtgacactgaagccgcaacgcggaaaaacctgaacccctccggcgcc  
gtgtatctcatttaggaacaaacattcgcattcgcattcacattgttatcagttaaaaagtctatggaacggtaagcatg  
ttaattagtcagctctgacgctgctgggtgacaggttggttaattaggctctgcatttagctgttttgatggctgctgctg  
ccgccatacatgtatcatcttcttgtggttgatggtaacctaacccgctaacaatggttaaccttaggccatgtattaatt  
actccgctctaattgtttgtatgtgtattgtcaaacttgcagaaccagttgcatgcatgaaaaataat

>Oaxaca\_INIFAP JSG 197\_AY106371

aattaagaacaagaggcaattaagtcagtagcctaaaggcacaccctggaggccctgctgtttcagagtttgattggggaa  
ctggttagatacctttgactaccattct--  
gttatttcttttagatctttggctctaatacaaatgtggatggcttttagaagtcttgtcttctccatctaaaatgctttgc  
aaacaggtgataccccaaggcgttctgctcgtattagcagagaaagtcaaggtatttgatagccagagggcgagaagatc  
ccgaagcgcagcaggaactccagtggttaggaagggtaagcaggggaagaaggaaaccctgagaccgaagaagccaaaga  
tgctgaaactggcaaggaggcagaggaggccccaagcgaagatgccgcaaaggagactgatgtggagatgaagcctgctg  
aagaggtgaagggggcctctgctgaaacagaagatgctgacatggctgatgctcctgcaccagcaccaatggaagaagat  
aagaaacaaactgaagaactggcagaagctattgcagctcctcctgtgccatcggaggagaagaaaga---  
tgtcaagccagctgagcctgaagctgcagcaagcaaccactgaggattcggcccctgctcctgctgaacctgctgatg



ttgctgctccagctgctgagaccaaatacagacgccaaacctgctgctgttgctgctccagtgctgagaccaaatacagac  
gccgagcctgctgctgttgctgctccagcgcctgagaccaaatacagacgctgagcctgctgctgttgctgctccagctcc  
tgagaccaaatacagtagccgagcctgctgctgttgctgctccagcgcctaagaccaaatacagatgccgagcctgctgctg  
ttgctgctccagtgctgagaccaaatacagatgccgagcctgctgctgttgctgctccagtgctgaaacgaaatacagat  
gctgagcctgctgctgatgctgctccagttcctgagatgaaatacagagtcgagcctgctgctgttgctgctccagcgtc  
tgaaaccaaatacagacgccgagcctgctgcccgttgctgctccagcgcctgagaccaaatacagatgccgagcctgctgctg  
ctgctgctccagtgctggaaccaactcagatgctgctgctactgatccagcacctggaaccaaggc---  
cactgccgccgatccagcacctggagctccagcagagaactccaccgacaaagacggaagccaggagagccagcccgtga  
acaatggacagctgccgcactcgacggtgaagtgcacctgaagccgcaacgccggaacccctgaacccctccggcgcc  
gtgtatctcatttaggaacaaacattcgcattcgcattcacattgttatcagttaaaaagtctatggaacggtaagcatg  
ttaattagtcagctctgacgctgctgggtgacaggttggttaattaggctctgcatttagctgttttgatggctgctgctg  
ccgccatacatgtatcatcttcttggttgatggtaacctaacccgctaacaatggttaaccttaggccatgtattaatt  
actccgctctaattggttgatggtattgtcaaaccttgacagaaccagttgcatgcatgaaaaataat

>Balsas\_Wilkes Site 6\_AY106371

aattaagaacaagaggcaattaagtcagtagcctaaaggcacaccctggaggccctgctgtttcagagtttgattggggaa  
ctggtagatacctttgactaccattct--  
gttatttcttttagatctttggctctaatacaaatgtggatggctttagaagcttcttccatctaaaatgctttgc  
aaacaggtgataccccaaggcgttctgctcgtattagcagagaaagtcagggtatttgatagccagagggcgagaagatc  
ccgaagcgcagcaggaactccagtggttaggaagggtaagcaggggaagaaggaaacccctgagaccgaagaagccaaaga  
tgctgaaactggcaaggaggcagaggaggcccaagcgaagatgccgcaaaggagactgatgtggagatgaagcctgctg  
aagaggtgaagggggcctctgctgaaacagaagatgctgacatggctgatgctcctgcaccagcaccaatggaagaagat  
aagaacaaaactgaagaactggcagaagctattgcagctcctcctgtgccatcggaggagaagaaga---  
tgtcaagccagctgagcctgaagctgcagcaagcaacccaactgaggattcggcccctgctcctgctgaacctgctgatg  
ttgctgctccagctgctgagaccaaatacagacgccaaacctgctgctgttgctgctccagtgctgagaccaaatacagac  
gccgagcctgctgctgttgctgctccagcgcctgagaccaaatacagacgctgagcctgctgctgttgctgctccagctcc  
tgagaccaaatacagtagccgagcctgctgctgttgctgctccagcgcctgagaccaaatacagatgccgagcctgctgctg  
ttgctgctccagtgctgagaccaaatacagatgccgagcctgctgctgttgctgctccagtgctgaaacgaaatacagat  
gctgagcctgctgctgatgctgctccagttcctgagatgaaatacagagtcgagcctgctgctgttgctgctccagcgtc  
tgaaaccaaatacagacgccgagcctgctgcccgttgctgctccagcgcctgagaccaaatacagatgccgagcctgctgctg  
ctgctgctccagtgctggaaccaactcagatgctgctgctactgatccagcacctggaaccaaggc---  
cactgccgccgatccagcacctggagctccagcagagaactccaccgacaaagacggaagccaggagagccagcccgtga  
acaatggacagctgccgcactcgacggtgaagtgcacctgaagccgcaacgccggaacccctgaacccctccggcgcc  
gtgtatctcatttaggaacaaacattcgcattcgcattcacattgttatcagttaaaaagtctatggaacggtaagcatg  
ttaattagtcagctctgacgctgctgggtgacaggttggttaattaggctctgcatttagctgttttgatggctgctgctg  
ccgccatacatgtatcatcttcttggttgatggtaacctaacccgctaacaatggttaaccttaggccatgtattaatt  
actccgctctaattggttgatggtattgtcaaaccttgacagaaccagttgcatgcatgaaaaataat

>Jalisco\_Benz 967\_AY106371

aattaagaacaagaggcaattaagtcagtagcctaaaggcacaccctggaggccctgctgtttcagagtttgattggggaa  
ctggtagatacctttgactaccattct--  
gttatttcttttagatctttggctctaatacaaatgtggatggctttagaagcttcttccatctaaaatgctttgc  
aaacaggtgataccccaaggcgttctgctcgtattagcagagaaagtcagggtatttgatagccagagggcgagaagatc  
ccgaagcgcagcaggaactccagtggttaggaagggtaagcaggggaagaaggaaacccctgagaccgaagaagccaaaga  
tgctgaaactggcaaggaggcagaggaggcccaagcgaagatgccgcaaaggagactgatgtggagatgaagcctgctg  
aagaggtgaagggggcctctgctgaaacagaagatgctgacatggctgatgctcctgcaccagcaccaatggaagaagat  
aagaacaaaactgaagaactggcagaagctattgcagctcctcctgtgccatcggaggagaagaaga---  
tgtcaagccagctgagcctgaagctgcagcaagcaacccaactgaggattcggcccctgctcctgctgaacctgctgatg  
ttgctgctccagtgctgagaccaaatacagacgccaaacctgctgctgttgctgctccagtgctgagaccaaatacagac  
gccgagcctgctgctgttgctgctccagcgcctgagaccaaatacagacgctgagcctgctgctgttgctgctccagctcc  
tgagaccaaatacagtagccgagcctgctgctgttgctgctccagcgcct-----  
-----  
gagaccaaatacagatgccgagcctgctgctgttgctgctccagtgctgaaacgaaatacagatgctgagcctgctgctga  
tgctgctccagttcctgagatgaaaccagagtcgagcctgctgctgttgctgctccagcgtctgaaaccaaatacagacg  
ccgagcctgctgcccgttgctgctccagcgcctgagaccaaatacagatgccgagcctgctgctgctgctccagtgct  
ggaaccaactcagatgctgctgctactgatccagcacctggaaccaaggc---  
cactgccgccgatccagcacctggagctccagcagagaactccaccgacaaagacggaagccaggagagccagcccgtga

acaatggacagctgccgcactcgacgggtgaagtgcacctgaagccgcaacgccggaaaaaacctgaacccttccggcgcc  
gtgtatctcatttaggaacaaacatttcgatttcgattcacattgttatcagttaaaaagtctatggaacggtaagcatg  
ttaattagtcagctctgacgctgctgggtgacagggttggaattaggctctgcatttagctgttttgatggctgctgctg  
ccgccatacatgtatcatcttcttgtggttgatggtacctaacccgctaacaatgtaaccttaggccatgtattaatt  
actccgctctaattggttgatgtgtattgtcaaacttgcagaaccagttgcatgcatgaaaaataat

>Jalisco\_INIFAP JSG y MAS 401\_AY106371

aattaagaacaagaggcaattaagtcagtacctaaaggcacaccctggaggccctgctgtttcagagtttgattggggaa  
ctggtagatacctttgactaccattct--

gttatttcttttagatctttggctctaatacaaatgtggatggctttagaagctctgtcttctccatctaaaatgctttgc  
aaacaggtgataccccaaggcgttctgctcgtattagcgagaaagtcaaggtatttgatagccagagggcgagaagatc  
ccgaagcgcagcaggaactccagtggttaggaagggttaagcaggggaagaaggaaaccctgagaccgaagaagccaaaga  
tgctgaaactggcaaggaggcagaggaggcccaagcgaagatgccgcaaaggagactgatgtggagatgaagcctgctg  
aagaggtgaagggggcctctgctgaaacagaagatgctgacatggctgatgctcctgcaccagcaccaatggaagaagat  
aagaaacaaactgaagaactggcagaagctattgcagctcctcctgtgccatcggaggagaagaaaga---  
tgtcaagccagctgagcctgaagctgcagcaagcaaccctgaggattcggccctgctcctgctgaacctgctgatg  
ttgctgctccagctgctgagaccaaactcagacgccaaacctgctgctggtgctgctccagtgctgagaccaaactcagac  
gccgagcctgctgctggtgctgctccagcgcctgagaccaaactcagacgctgagcctgctgctggtgctgctccagctcc  
tgagaccaaactcagtagccgagcctgctgctggtgctgctccagcgcct-----  
-----

gagaccaaactcagatgccgagcctgctgctggtgctgctccagtgctgaaacgaaatcagatgctgagcctgctgctga  
tgctgctccagttcctgagatgaaaccagagtcagagcctgctgctggtgctgctccagcgtctgaaaccaaactcagacg  
ccgagcctgctgccgttgctgctccagcgcctgagaccaaactcagatgccgagcctgctgctgctgctgctccagtgct  
ggaaccaactcagatgctgctgctactgatccagcacctggaaccaaggc---  
cactgccgccgatccagcacctggagctccagcagagaactccaccgacaaagacggaagccaggagagccagcccgtga  
acaatggacagctgccgcactcgacgggtgaagtgcacctgaagccgcaacgccggaaaaaacctgaacccttccggcgcc  
gtgtatctcatttaggaacaaacatttcgatttcgattcacattgttatcagttaaaaagtctatggaacggtaagcatg  
ttaattagtcagctctgacgctgctgggtgacagggttggaattaggctctgcatttagctgttttgatggctgctgctg  
ccgccatacatgtatcatcttcttgtggttgatggtacctaacccgctaacaatgtaaccttaggccatgtattaatt  
actccgctctaattggttgatgtgtattgtcaaacttgcagaaccagttgcatgcatgaaaaataat

>Balsas\_CIMMYT 8783\_AY106371

aattaagaacaagaggcaattaagtcagtacctaaaggcacaccctggaggccctgctgtttcagagtttgattggggaa  
ctggtagatacctttgactaccattct--

gttatttcttttagatctttggctctaatacaaatgtggatggctttagaagctctgtcttctccatctaaaatgctttgc  
aaacaggtgataccccaaggcgttctgctcgtattagcgagaaagtcaaggtatttgatagccagagggcgagaagatc  
ccgaagcgcagcaggaactccagtggttaggaagggttaagcaggggaagaaggaaaccctgagaccgaagaagccaaaga  
tgctgaaactggcaaggaggcagaggaggcccaagcgaagatgccgcaaaggagactgatgtggagatgaagcctgctg  
aagaggtgaagggggcctctgctgaaacagaagatgctgacatggctgatgctcctgcaccagcaccaatggaagaagat  
aagaaacaaactgaagaactggcagaagctattgcagctcctcctgtgccatcggaggagaagaaaga---  
tgtcaagccagctgagcctgaagctgcagcaagcaaccctgaggattcggccctgctcctgctgaacctgctgatg  
ttgctgctccagctgctgagaccaaactcagacgccaaacctgctgctggtgctgctccagtgctgagaccaaactcagac  
gccgagcctgctgctggtgctgctccagcgcctgagaccaaactcagacgctgagcctgctgctggtgctgctccagctcc  
tgagaccaaactcagtagccgagcctgctgctggtgctgctccagcgcct-----  
-----

gagaccaaactcagatgccgagcctgctgctggtgctgctccagtgctgaaacgaaatcagatgctgagcctgctgctga  
tgctgctccagttcctgagatgaaactcagagtcagagcctgctgctggtgctgctccagcgtctgaaaccaaactcagacg  
ccgagcctgctgccgttgctgctccagcgcctgagaccaaactcagatgccgagcctgctgctgctgctgctccagtgct  
ggaaccaactcagatgctgctgctactgatccagcacctggaaccaaggc---  
cactgccgccgatccagcacctggagctccagcagagaactccaccgacaaagacggaagccaggagagccagcccgtga  
acaatggacagctgccgcactcgacgggtgaagtgcacctgaagccgcaacgccggaaaaaacctgaacccttccggcgcc  
gtgtatctcatttaggaacaaacatttcgatttcgattcacattgttatcagttaaaaagtctatggaacggtaagcatg  
ttaattagtcagctctgacgctgctgggtgacagggttggaattaggctctgcatttagctgttttgatggctgctgctg  
ccgccatacatgtatcatcttcttgtggttgatggtacctaacccgctaacaatgtaaccttaggccatgtattaatt  
actccgctctaattggttgatgtgtattgtcaaacttgcagaaccagttgcatgcatgaaaaataat

>Balsas\_CIMMYT 11355\_AY106371

aattaagaacaagaggcaattaagtcagtacctaagggcacaccctggaggccctgctgtttcagagtttgattggggaa  
ctggtagatacctttgactaccattct--  
gttatttcttttagatctttggctctaatacaaatgtggatggcttttagaagtcttgtcttctccatctaaaatgctttgc  
aaacaggtgatacccaagggcgttctgctcgtattagcgagaaagtcaaggtatttgatagccagagggcgagaagatc  
ccgaagcgcagcaggaactccagtggttaggaagggtaagcaggggaagaaggaaaccctgagaccgaagaagccaaaga  
tgctgaaactggcaaggaggcagaggaggcccaagcgaagatgccgcaaaggagactgatgtggagatgaagcctgctg  
aagaggtgaagggggcctctgctgaaacagaagatgctgacatggctgatgctcctgcaccagcaccaatggaagaagat  
aagaaacaaactgaagaactggcagaagctattgcagctcctcctgtgccatcggaggagaagaaaga---  
tgtcaagccagctgagcctgaagctgcagcaagcaaccctgaggattcggccctgctcctgctgaacctgctgatg  
ttgctgctccagctgctgagaccaaactcagacgccaaacctgctgctgttgctgctccagtgctgagaccaaactcagac  
gccgagcctgctgctgttgctgctccagcgcctgagaccaaactcagacgctgagcctgctgctgttgctgctccagctcc  
tgagaccaaactcagtagccgagcctgctgctgttgctgctccagcgcct-----  
-----  
gagaccaaactcagatgccgagcctgctgctgttgctgctccagtgctgaaacgaaactcagatgctgagcctgctgctga  
tgctgctccagttcctgagatgaaactcagagtcgagcctgctgctgttgctgctccagcgtctgaaaccaaactcagacg  
ccgagcctgctgccgttgctgctccagcgcctgagaccaaactcagatgccgagcctgctgctgctgctgctccagtgct  
ggaaccaactcagatgctgctgctactgatccagcacctggaaccaagggc---  
cactgccgccgatccagcacctggagctccagcagagaactccaccgacaaagacggaagccaggagagccagcccgta  
acaatggacagctgccgcactcgacggtagagtgacactgaagccgcaacgcggaaaaacctgaacccttccggcgcc  
gtgtatctcatttaggaacaaacattcg-----  
cattcacattgttatcagttaaaaagtctatggaacggtaagcatgttaattagtcagctctgacgctgctgggtgacagg  
ttggtaataggctctgcatttagctgttttgatggctgctgctgcgccatacatgtatcatcttcttggtgtgat  
ggtacctaacgcgtaaacatggttaaccttaggccatgtattaactccgctctaattgtttgatgtgtattgtcaaa  
cttgacagaactagttgcatgcatgaaaaataat

>Balsas\_INIFAP JSP y Lo5130\_AY106371

aattaagaacaagaggcaattaagtcagtacctaagggcacaccctggaggccctgctgtttcagagtttgattggggaa  
ctggtagatacctttgactaccattct--  
gttatttcttttagatctttggctctaatacaaatgtggatggcttttagaagtcttgtcttctccatctaaaatgctttgc  
aaacaggtgatacccaagggcgttctgctcgtattagcgagaaagtcaaggtatttgatagccagagggcgagaagatc  
ccgaagcgcagcaggaactccagtggttaggaagggtaagcaggggaagaaggaaaccctgagaccgaagaagccaaaga  
tgctgaaactggcaaggaggcagaggaggcccaagcgaagatgccgcaaaggagactgatgtggagatgaagcctgctg  
aagaggtgaagggggcctctgctgaaacagaagatgctgacatggctgatgctcctgcaccagcaccaatggaagaagat  
aagaaacaaactgaagaactggcagaagctattgcagctcctcctgtgccatcggaggagaagaaaga---  
tgtcaagccagctgagcctgaagctgcagcaagcaaccctgaggattcggccctgctcctgctgaacctgctgatg  
ttgctgctccagctgctgagaccaaactcagacgccaaacctgctgctgttgctgctccagtgctgagaccaaactcagac  
gccgagcctgctgctgttgctgctccagcgcctgagaccaaactcagacgctgagcctgctgctgttgctgctccagctcc  
tgagaccaaactcagtagccgagcctgctgctgttgctgctccagcgcct-----  
-----  
gagaccaaactcagatgccgagcctgctgctgttgctgctccagtgctgaaacgaaactcagatgctgagcctgctgctga  
tgctgctccagttcctgagatgaaactcagagtcgagcctgctgctgttgctgctccagcgtctgaaaccaaactcagacg  
ccgagcctgctgccgttgctgctccagcgcctgagaccaaactcagacgccgagcctgctgctgctgctgctccagtgct  
ggaaccaactcagatgctgctgctactgatccagcacctggaaccaagggc---  
cactgccgccgatccagcacctggagctccagcagagaactccaccgacaaagacggaagccaggagagccagcccgta  
acaatggacagctgccgcactcgacggtagagtgacactgaagccgcaacgcggaaaaacctgaacccttccggcgcc  
gtgtatctcatttaggaacaaacattcgattcgcattcacattgttatcagttaaaaagtctatggaacggtaagcatg  
ttaattagtcagctctgacgctgctgggtgacaggttggtaataggctctgcatttagctgttttgatggctgctgctg  
ccgccatacatgtatcatcttcttggtgtgatggtacctaacgcgtaaacatggttaaccttaggccatgtattaatt  
actccgctctaattgtttgatgtgtattgtcaaaccttgacagaactagttgcatgcatgaaaaataat

>Balsas\_INIFAP JSG 378\_AY106371

aattaagaacaagaggcaattaagtcagtacctaagggcacaccctggaggccctgctgtttcagagtttgattggggaa  
ctggtagatacctttgactaccattct--  
gttatttcttttagatctctggctctaatacaaatgtggatggcttttagaagtcttgtcttctccatctaaaatgctttgc  
aaacaggtgatacccaagggcgttctgctcgtattagcgagaaagtcaaggtatttgatagccagagggcgagaagatc  
ccgaagcgcagcaggaactccagtggttaggaagggtaagcaggggaagaaggaaaccctgagaccgaagaagccaaaga  
tgctgaaactggcaaggaggcagaggaggcccaagcgaagatgcccaaaaggagactgatgtggagatgaagcctgctg

aacaggtgaaggggctctgctgaaacagaagatgggtgacatggctgatgctcctgcaccagcaccaatggaagaagat  
aagaaacaaactgaagaactggcagaagctattgcagctcctcctgtgccatcggaggagaagaaagaagatgtcaagcc  
agctgagcctgaagctgcagcaagcaaccaactgaggattcggccctgctcctgctgaacctgctgatgttgctgctc  
cagctgctgagaccaaactcagacgccaacactgctgctgttgctgctccagcgcctgagaccaaactcagacgcccagcct  
gctgctgttgctgctccagcgcctgagaccaaactcagacgctgagcctgctgctgttgctgctccagcttctgagaccaa  
atcagtagccgagcctgctgctgttgctgctccagcgcct-----  
-----

gagaccaaactcagacgcccagcctgctgctgttgctgctccagtgctgaaacgaaactcagatgctgagcctgctgctga  
tgctgctccagttcctgagatgaaactcagagtcgagcctgctgctgttgctgctcaagcgtctgaaaccaaactcagatg  
ccgagcctgctgcccgttgctgctccagcgcctgagaccaaactcagatgcccagcctgctgctgctgctgctccagtgct  
ggaaccaactcagatgctgctgctactgatccagcacctggaaccaagcc---  
cactgccgcccgatccagcacctggagctccagcagagaactccaccgacaaagacggaagccaggagagccagcccgtga  
acaatggacagctgccgcactcgacggtgaagtgcacctgaagcgcgaacgcggaaaaaacctgaacccttccggcgc  
gtgtatctcatttaggaacaaacattcg-----  
cattcacattgttatcagttaaaaagtctatggaacggtaagcatgttaattagtcagctctgacgctgctgggtgacagg  
ttggttaattagcctctgcatttagctgttttgatggctgctgtcgcgccatacatgtatcatcttcttggttgat  
ggtacctaaccgctaaacatgttaaccttaggccatgtattaactccgctctaattgtttgtatgtgtattgtcaaa  
cttgacagaactagttgcatgcatgaaaaataat

>Balsas\_INIFAP JSG 374\_AY106371

aattaagaacaagaggcaattaagtcagtagcctaaaggcacaccctggaggccctgctgtttcagagtttgattggggaa  
ctggtagatacctttgactaccattct--  
gttatttcttttagatctttggctctaataaaaaatgtggatggctttagaagtcttgctcatctccatctaaaatgctttgc  
aaacaggtgataccccaaggcgttctgctcgtattagcagagaaagtcaaggtatgtgatagccagagggcgagaagatc  
ccgaagcgcagcaggaactccagtggttaggaagggtaagcaggggaagaaggaacccctgagaccgaagaagccaaaga  
tgctgaaactggcaaggaggcagaggaggccccaagcgaagatgccgcaaaggagactgatgtggagatgaagcctgctg  
aagaggcgaagggggcctctgctgaaacagaagatgctgacatggctgatgctcctgcaccagcaccaatggaagaagat  
aagaaacaaactgaagaaccggcagaagctattgcagctcctcctgtgccatcggaggataaagaaagaagatgtcaagcc  
agctgagcctgaagctgcagcaagcaaccaactgaggatttggccctgctcctgctgaacctgctgctgttgctgctc  
cagctgctgagaccaaactcagacgccaacactgctgctgttgctgctccagtgctgagaccaaactcagaagccgagcct  
gctgctgttgctgctccagcgcctgagaccaaactcagacgcccagcctgctgctgttgctgctccagtgctgagaccaa  
atcagacgcccgaacctgctgctgttgctgctccagcgcct-----  
-----

gagaccaaactcagacgcccagcctgctgctgttgctgctccagtgctgaaacgaaactcagatgctgagcctgctgctga  
tgctgctccagttcctgagatgaaactcagagtcgagcctgctgctgttgccgctccagcgtctgaaaccaaactcagacg  
ccgagcctgctgcccgttgctgctccagcgcctgagaccaaactcagatgcccagcctgctgttgctgctgctccagtgct  
ggaaccaactcagatgcccactgctactgatccagcatctggaaccaagcc---  
cactgccgcccgatccagcacctggagctccagcagagaactccaccgacaaagacggaagccaggagagccagcccgtga  
acaatggacagctgccgcactcgacggtgaagtgcacctgaagcgcgaacgcggaaaaaacctgaacccttccggcgc  
gtgtatctcatttaggaacaaacattcc-----  
cattcgcattgttatcagttaaaaagtctatggaacggtaagcatgttaattagtcagctctgacgctgctgggtgacagg  
ttggttaattagcctctgcatttagctgttttgatggctgctgtcgcgccatacatgtatcatcttcttggttgat  
ggtacctaaccgctaaacatgttaaccttaggccatgtattaacttactccgctctaattgtttgtatgtgtattgtcaaa  
cttgacagaaccagttgcatgcatgaaaaataat

>Jalisco\_INIFAP JSG y MAS 264\_AY106371

aattaagaacaagaggcaattaagtcagtagcctaaaggcacaccctggaggccctgctgtttcagagtttgattggggaa  
ctggtagatacctttgactaccattct--  
gttatttcttttagatctttggctctaataaaaaatgtggatggctttagaagtcttgctcatctccatctaaaatgctttgc  
aaacaggtgataccccaaggcgttctgctcgtattagcagagaaagtcaaggtatgtgatagccagagggcgagaagatc  
ccgaagcgcagcaggaactccagtggttaggaagggtaagcaggggaagaaggaacccctgagaccgaagaagccaaaga  
tgctgaaactggcaaggaggcagaggaggccccaagcgaagatgccgcaaaggagactgatgtggagatgaagcctgctg  
aagaggcgaagggggcctctgctgaaacagaagatgctgacatggctgatgctcctgcaccagcaccaatggaagaagat  
aagaaacaaactgaagaaccggcagaagctattgcagctcctcctgtgccatcggaggataaagaaagaagatgtcaagcc  
agctgagcctgaagctgcagcaagcaaccaactgaggatttggccctgctcctgctgaacctgctgctgttgctgctc  
cagctgctgagaccaaactcagacgccaacactgctgctgttgctgctccagtgctgagaccaaactcagaagccgagcct  
gctgctgttgctgctccagcgcctgagaccaaactcagacgcccagcctgctgctgttgctgctccagtgctgagaccaa

atcagacgccgaacctgctgctggtgctgctccagtgct-----  
-----  
gagaccaaatacagacgccgagcctgctgctggtgctgctccagtgctgaaacgaaatacagatgctgagcctgctgctga  
tgctgctccagttcctgagatgaaatacagagctgagcctgctgctggtgcccgtccagcgtctgaaaccaaatacagacg  
ccgagcctgctgcccgttgctgctccagcgcctgagaccaaatacagatgccgagcctgctggtgctgctgctccagtgct  
ggaaccaactcagatgccactgctactgatccagcatctggaaccaagggc---  
cactgccgcccgatccagcacctggagctccagcagagaactccaccgacaaagacggaagccaggagagccagcccgtga  
acaatggacagctgccgcactcgacggtgaagtgcacctgaagctgcaacgccggaaaaaacctgaacccttccggcgcc  
gtgtatctcatttaggaacaaacattcc-----  
cattcgcattgttatcagttaaaaagtctatggaacggtaagcatggttaattagtcagctctgacgctgctgggtgacagg  
ttggtaattaggctctgcatttagctgttttgatggctgctgtgcccgcatacatgtatcatcttcttggtggtgtat  
ggtacctaaccgctgaagcatattaaccttaggccatgtattaattactctgctctaattggttgatgtgtattgtcaaa  
cttgcacaactagttgcatgcatgaaaaataat

>Balsas\_Beadle & Kato Site 4\_AY106371

aattaagaacaagaggcaattaagtcagtacctaaaggcacaccctgggtggccctgctggttcagagtttgattggggaa  
ctggtagatacctttgactaccattct--  
gttatttcttttagatctctggctctaatacaaatgtggatggctttagaagctctgtcatctccatctaaaatgctttgc  
aaacaggtgataccccaagggcttctgctcgtattagcagagaaagtcagggtatttgatagcccagagggcgagaagatc  
ccgaagcgcagcaggaactccagtggttaggaagggtaagcaggggaagaaggaaacccctgagaccgaagaagccaaaga  
tgctgaaactggcaaggaggcagaggaggcccaagcgaagatgccgcaaaggagactgatgtggagatgaagcctgctg  
aagaggcgaagggggcctctgctgaaacagaagatgctgacatggctgatgctcctgcaccagcaccaatggaagaagat  
aagaacaaaactgaagaaccggcagaagctattgcagctcctcctgtgccatcggaggagaagaagaagaatgtcaagcc  
agctgagcctgaagctgcagcaaacacccaactgaggattcggccccctgctcctgctgaacctgctgctggtgctgctc  
cagctgctgagaccaaatacagacgccaaacctgctgctggtgctgctccaatgctgagaccaaatacagacgccgagcct  
gctgctggtgctgctccagcgcctgagaccaaatacagacgccgagactgctgctggtgctgctccagtgctgagaccaa  
atcagacgccgagcctgctgctggtgctgctccagcgcct-----  
-----

gagaccaaatacagatgccgagcctgctgctggtgctgctccagtgctgaaacgaaatacagatgctgagcgtgctgctga  
tgctgctccagttcctgagatgaaatacagcgtccgagcctgctgctggtgcccgtccagtgctgaaaccaaatacagacg  
ccgagcctgctgcccgttgctgctccagcgcctgagaccaaatacagatgccgagcctgctgctgctgctgctccagtgct  
ggaaccaactcagatgccactgctactgatccagcatctggaaccaagggc---  
cactgccgcccgatccagcacctggagctccagcagagaactccaccgacaaagacggaagccaggagagccagcccgtga  
acaatggacagctgccgcactcgacggtgaagtgcacctgaagcgcgaacgccggaaaaaacctgaacccttccggcgcc  
gtgtatctcatttaggaacaaacattcg-----  
cattggcattgttatcagttaaaaagtctatggaacggtaagcatggttaattagtcagctctgacgctgctgggtgacagg  
ttggtaattaggctctgcatttagctgttttgatggctgctgtgcccgcatacatgtatcatcttcttggtggtgtat  
ggtacctaaccgctgaagcatattaaccttaggccatgtattaattactctgctctaattggttgatgtgtattgtcaaa  
cttgcagaactagttgcatgcatgaaaaataat

>Balsas\_INIFAP JSG y LOS 119\_AY106371

aattaagaacaagaggcaattaagtcagtacctaaaggcacaccctgggtggccctgctggttcagagtttgattggggaa  
ctggtagatacctttgactaccattct--  
gttatttcttttagatctctggctctaatacaaatgtggatggctttagaagctctgtcatctccatctaaaatgctttgc  
aaacaggtgataccccaagggcttctgctcgtattagcagagaaagtcagggtatttgatagcccagagggcgagaagatc  
ccgaagcgcagcaggaactccagtggttaggaagggtaagcaggggaagaaggaaacccctgagaccgaagaagccaaaga  
tgctgaaactggcaaggaggcagaggaggcccaagcgaagatgccgcaaaggagactgatgtggagatgaagcctgctg  
aagaggcgaagggggcctctgctgaaacagaagatgctgacatggctgatgctcatgcaccagcaccaatggaagaagat  
aagaacaaaactgaagaaccggcagaagctattgcagctcctcctgtgccatcggaggagaagaagaagaatgtcaagcc  
ggctgagcctgaagctgcagcaagcaacccaactgaggattcggccccctcctcctgctgaacctgctgctggtgctgctc  
cagctgctgagaccaaatacagacgccaaacctgctgctggtgctgctccagtgctgagaccaaatacagacgccgagcct  
gctgctggtgctgctccagcgcctgagaccaaatacagacgccgagcctgctgctggtgctgctccagtgctgagaccaa  
atcagacgccgagcctgctgctggtgctgctccagcgcct-----  
-----

gagaccaaatacagatgccgagcctgctgctggtgctgctccagtgctgaaacgaaatacagatgctgagcctgctgctga  
tgctgctccagttcctgagatgaaatacagagctccgagcctgctgctggtgcccgtccagcgtctgaaaccaaatacagacg  
ccgagcctgctgcccgttgctgctccagcgcctgagaccaaatacagatgccgagcctgctgctgctgctgctccagtgct

ggaaccaactcagatgccactgctactgatccagcatctggaaccaagggc---  
cgctgctgccgatccagcacctggagctccagcagagaactccaccgacaaagacggaagccaggagagccagcccgtga  
acaatggacagctgccacactcgacggggaagtgcacctgaagccgcaacgcggaaaaacctgaacccttccggcgcc  
gtgtatctcatttaggaacaaacattcg-----  
cattcgcatgttatcagttaaaaagtctatggaacggtaagcatgttaattagtcagtcctgacgctgctgggtgacagg  
ttggtaattaggctctgcatcttagctgttttgtatggctgctgtcgccgccatacatgtatcatcttctgtgggtgtat  
ggtacctaaccgctgaagcatattaaccttaggccatgtattaactccgctctaattgtttgtatgtgtattgtcaaa  
cttgacagaactagttgcatgcatgaaaaataat

>Balsas\_INIFAP JSG y LOS 161\_AY106371

aattaagaacaagaggcaattaagtcagtacctaagggcacaccctggggcctgctgtttcagagtttgattggggaa  
ctggtagatacctttgactaccattct--  
gttatttctttagatctctggctctaatacaaatgtggatggctttagaagcttctgcatctccatctaaaatgctttgc  
aaacaggtgataccccaagggcttctgctcgtattagcgagaaagtcaaggtatttgatagccagagggcgagaagatc  
ccgaagcgcagcaggaactccagtggttaggaagggtaagcaggggaagaaggaaaccctgagaccgaagaagccaaaga  
tgctgaaactggcaaggaggcagaggaggcccaagcgaagatgcccgaaggagactgatgtggagatgaagcctgctg  
aagaggcgaagggggcctctgctgaaacagaagatgctgacatggctgatgctcatgaccagcaccatggaagaagat  
aagaaacaaactgaagaaccggcagaagctattgcagctcctcctgtgccatcggaggagaagaagaagatgtcaagcc  
ggctgagcctgaagctgcagcaagcaacccaactgaggattcggccctgctcctgctgaacctgctgctgttctgctc  
cagctgctgagaccaaactcagacgccaacctgctgctgttctgctcagtgctgagaccaaactcagacgcccagcct  
gctgctgttctgctcagcgcctgagaccaaactcagacgcccagcctgctgctgttctgctcagtgctgagaccaa  
atcagacgcccagcctgctgctgttctgctcagcgcct-----  
-----

gagaccaaactcagatgccagcctgctgctgttctgctcagtgccctgaaacgaaatcagatgctgagcctgctgctga  
tgctgctccagtttctgagatgaaatcagagtcagcgcctgctgctgttgcgctccagcgtctgaaaccaaactcagacg  
ccgagcctgctgccgttctgctcagcgcctgagaccaaactcagatgccagcctgctgctgctgctcagtgctc  
ggaaccaactcagatgccactgctactgatccagcatctggaaccaagggc---  
cgctgctgccgatccagcacctggagctccagcagagaactccaccgacaaagacggaagccaggagagccagcccgtga  
acaatggacagctgccacactcgacggggaagtgcacctgaagccgcaacgcggaaaaacctgaacccttccggcgcc  
gtgtatctcatttaggaacaaacattcg-----  
cattcgcatgttatcagttaaaaagtctatggaacggtaagcatgttaattagtcagtcctgacgctgctgggtgacagg  
ttggtaattaggctctgcatcttagctgttttgtatggctgctgtcgccgccatacatgtatcatcttctgtgggtgtat  
ggtacctaaccgctgaagcatattaaccttaggccatgtattaactccgctctaattgtttgtatgtgtattgtcaaa  
cttgacacaactagttgcatgcatgaaaaataat

>Tripsacum\_WW-2120\_haplotype1\_AY106371

aattaagaacaagaggcaactaagtcagtacctaagggcacaccctggaggcctgctgcttccagagtttgattggggaa  
ctggtagatacctttgactaccactctttgttatttcttttagatctctggctctaatacaaatgtggatggctttagaag  
tcttcttctccgctctaaaatgctttgcaaacaggtgataccccaagggcgttctgctcgtattagcgagaaagtcaagg  
tatttgatagccagagggcgagaagatcccgaacgcagcaggaactccagtggttaggaagggtaagcaggggaagaag  
gaagcccctgaaaccgaagaagccaaagatgctgaaactggcaaggaggcagaggaggcccaagcgaagatgccgcaaa  
ggagactgatgtggagatgaagcttctgctgaagaggcgaagggggccctgctgaaactgaagatactgacatggctgatg  
ctcctgcaccagcaccatggaagaagataagaaagaaactgaggaaccagctgaagctgttgcagctcctctgtgcc  
tcggaggcgaagaagaagatgccaagccagctgagcctgaagctgcagcaagcaacccaactgagaactcggccctgc  
tctgcccagcctgctgctattgctgctgcagcgcctgagaccaaactcagacgcccagcctgctgctgatgctgctccag  
cgctgagaccaaactcagacgcccagcctgctgctgttctgctcagcgcctgagaccaaactcagacaccgagcctgct  
gctgttctgctcagcgcctgagatcaaatcagatgccagcctgctgctgatgctgctcagcgcctgagaccaaactc  
agatgccagcctgctgctgttgcgctccagtgctgagaccaaactcagatgccagcctgctgctgttgcgctccag  
cgctgagcctcaaatcagatgccagcctgctgctgttgcgccccagcgcctgaggccaaactcagatgctgagcctgct  
gctgttgcgctccagctcccgaaccaaactcagacgccaagggctgctgctgttctgctcagcgcctgaaaccaaactc  
agatgcagagcctgctgctgctgctcagcgcctgaaaccaaactcagatgctgctgctactgatccagcgcctggaa  
ccaaggtgcccgcgcccgatccagcacctggagctccagtagagaactccaccgacaaagacggaagccaggagagc  
cagctcgtgaacaacgggcagctgccgactcaacggggaagtgcacctgaagctggaacgcggaaaaagcctgaaccct  
tccggcgccgtgtatctcatttaggaacaaacattcg-----  
cattcgcatgttatcagttaaaaagtctatgggtcggtgaagcatgttaattagtcagtcctgacgctgctgcat-----  
-----ttag-cttt-----

ttgtatggctgctgtcgccgccatacatgtatcatcttctgtgggtgtgttctgacctaaccgctgaagcatattaacc
